# Supplementary material for: The morphology and biochemistry of nanostructures provide evidence for synthesis and signaling functions in human cerebrospinal fluid
Source: PubMed Central journal article supplement (PMC2746175; doi:10.1186/1743-8454-6-10), 2009-09-07
Supplement: 1743-8454-6-10-S1.pdf [file 1743-8454-6-10-S1.pdf]

**Supplementary Table 1. Proteins from Total CSF from repeated analyses of two independent samples (Data 1 and Data 2).**

The two CSF samples were obtained from two different participants with Alzheimer's disease, as described in the Methods and Table. CSF proteins were prepared, treated with trypsin, fractionated, and analyzed using different formats of mass spectrometry in order to get as many different proteins confidently identified as possible, as described in the Methods. Proteins are ordered by Sample 1 followed by Sample 2, and within each sample, they are ordered by the protein GO component assignment in alphabetical order

| Uniprot number | Data 1 Protein Name                                                                                                                                                          | Component_CATEGORY |
|----------------|------------------------------------------------------------------------------------------------------------------------------------------------------------------------------|--------------------|
| Q02224         | Centromeric protein E (CENP-E).                                                                                                                                              | Chromosomal        |
| Q12948         | [Forkhead box protein C1 (Forkhead-related protein FKHL7) (Forkhead-, related transcription factor 3) (FREAC-3).]                                                            | Chromosomal        |
| Q93077         | Histone H2A type 1-C.                                                                                                                                                        | Chromosomal        |
| P06400         | Retinoblastoma-associated protein (PP110) (P105-RB) (RB).                                                                                                                    | Chromosomal        |
| P46100         | [Transcriptional regulator ATRX (EC 3.6.1.-) (ATP-dependent helicase, ATRX) (X-linked helicase II) (X-linked nuclear protein) (XNP) (Znf-, HX).]                             | Chromosomal        |
| Q13112         | [Chromatin assembly factor 1 subunit B (CAF-1 subunit B) (Chromatin, assembly factor I p60 subunit) (CAF-I 60 kDa subunit) (CAF-Ip60) (M-, phase phosphoprotein 7).]         | Chromosomal        |
| P03372         | Estrogen receptor (ER) (Estradiol receptor) (ER-alpha).                                                                                                                      | Chromosomal        |
| P49736         | [DNA replication licensing factor MCM2 (Minichromosome maintenance, protein 2 homolog) (Nuclear protein BM28).]                                                              | Chromosomal        |
| Q13111         | [Chromatin assembly factor 1 subunit A (CAF-1 subunit A) (Chromatin, assembly factor I p150 subunit) (CAF-I 150 kDa subunit) (CAF-Ip150).]                                   | Chromosomal        |
| P07199         | Major centromere autoantigen B (Centromere protein B) (CENP-B).                                                                                                              | Chromosomal        |
| O14757         | Serine/threonine-protein kinase Chk1 (EC 2.7.11.1).                                                                                                                          | Chromosomal        |
| P33993         | DNA replication licensing factor MCM7 (CDC47 homolog) (P1.1-MCM3).                                                                                                           | Chromosomal        |
| Q92900         | [Regulator of nonsense transcripts 1 (EC 3.6.1.-) (ATP-dependent, helicase RENT1) (Nonsense mRNA reducing factor 1) (NORF1) (Up-, frameshift suppressor 1 homolog) (hUpf1).] | Chromosomal        |
| P02730         | [Band 3 anion transport protein (Anion exchange protein 1) (AE 1), (Solute carrier family 4 member 1) (CD233 antigen).]                                                      | Cytoskeletal       |
| P80723         | [Brain acid soluble protein 1 (BASP1 protein) (Neuronal axonal membrane, protein NAP-22) (22 kDa neuronal tissue-enriched acidic protein).]                                  | Cytoskeletal       |
| O00499         | [Myc box-dependent-interacting protein 1 (Bridging integrator 1), (Amphiphysin-like protein) (Amphiphysin II) (Box-dependent myc-, interacting protein 1).]                  | Cytoskeletal       |
| Q13939         | Calicin.                                                                                                                                                                     | Cytoskeletal       |
| Q9Y696         | [Chloride intracellular channel protein 4 (Intracellular chloride ion, channel protein p64H1).]                                                                              | Cytoskeletal       |
| Q9UQ03         | Coronin-2B (Coronin-like protein C) (Clipin-C) (Protein FC96).                                                                                                               | Cytoskeletal       |
| P53355         | Death-associated protein kinase 1 (EC 2.7.11.1) (DAP kinase 1).                                                                                                              | Cytoskeletal       |
| Q16658         | Fascin (Singed-like protein) (55 kDa actin-bundling protein) (p55).                                                                                                          | Cytoskeletal       |
| P54840         | Glycogen [starch] synthase, liver (EC 2.4.1.11).                                                                                                                             | Cytoskeletal       |

|               |                                                                                                                                                                                                                           |              |
|---------------|---------------------------------------------------------------------------------------------------------------------------------------------------------------------------------------------------------------------------|--------------|
| <b>O00291</b> | Huntingtin-interacting protein 1 (HIP-1).                                                                                                                                                                                 | Cytoskeletal |
| <b>Q9Y573</b> | Actin-binding protein IPP (MIPP protein) (Kelch-like protein 27).                                                                                                                                                         | Cytoskeletal |
| <b>Q9COH6</b> | Kelch-like protein 4.                                                                                                                                                                                                     | Cytoskeletal |
| <b>P29966</b> | [Myristoylated alanine-rich C-kinase substrate (MARCKS) (Protein kinase, C substrate, 80 kDa protein, light chain) (PKCSL) (80K-L protein).]                                                                              | Cytoskeletal |
| <b>P11137</b> | Microtubule-associated protein 2 (MAP 2) (MAP-2).                                                                                                                                                                         | Cytoskeletal |
| <b>Q13459</b> | Myosin-IXb (Unconventional myosin-9b).                                                                                                                                                                                    | Cytoskeletal |
| <b>P19338</b> | Nucleolin (Protein C23).                                                                                                                                                                                                  | Cytoskeletal |
| <b>P07437</b> | Tubulin beta chain (Tubulin beta-5 chain).                                                                                                                                                                                | Cytoskeletal |
| <b>P46939</b> | Utrophin (Dystrophin-related protein 1) (DRP1) (DRP).                                                                                                                                                                     | Cytoskeletal |
| <b>O75366</b> | Advillin (p92).                                                                                                                                                                                                           | Cytoskeletal |
| <b>P62330</b> | ADP-ribosylation factor 6.                                                                                                                                                                                                | Cytoskeletal |
| <b>O00423</b> | Echinoderm microtubule-associated protein-like 1 (EMAP-1) (HuEMAP-1).                                                                                                                                                     | Cytoskeletal |
| <b>P06396</b> | [Gelsolin precursor (Actin-depolymerizing factor) (ADF) (Brevin), (AGEL).]                                                                                                                                                | Cytoskeletal |
| <b>Q13576</b> | Ras GTPase-activating-like protein IQGAP2.                                                                                                                                                                                | Cytoskeletal |
| <b>O95198</b> | Kelch-like protein 2 (Actin-binding protein Mayven).                                                                                                                                                                      | Cytoskeletal |
| <b>P78559</b> | [Microtubule-associated protein 1A (MAP 1A) (Proliferation-related, protein p80) [Contains: MAP1 light chain LC2].]                                                                                                       | Cytoskeletal |
| <b>P55083</b> | Microfibril-associated glycoprotein 4 precursor.                                                                                                                                                                          | Cytoskeletal |
| <b>P26038</b> | Moesin (Membrane-organizing extension spike protein).                                                                                                                                                                     | Cytoskeletal |
| <b>Q9UM54</b> | Myosin-VI (Unconventional myosin VI).                                                                                                                                                                                     | Cytoskeletal |
| <b>P20929</b> | Nebulin.                                                                                                                                                                                                                  | Cytoskeletal |
| <b>P53814</b> | Smoothelin.                                                                                                                                                                                                               | Cytoskeletal |
| <b>O95793</b> | Double-stranded RNA-binding protein Staufin homolog 1.                                                                                                                                                                    | Cytoskeletal |
| <b>Q9UBN4</b> | [Short transient receptor potential channel 4 (TrpC4) (Trp-related, protein 4) (hTrp-4) (hTrp4).]                                                                                                                         | Cytoskeletal |
| <b>O15195</b> | Villin-like protein.                                                                                                                                                                                                      | Cytoskeletal |
| <b>O43516</b> | [WAS/WASL-interacting protein family member 1 (Wiskott-Aldrich syndrome, protein-interacting protein) (WASP-interacting protein) (PRPL-2, protein).]                                                                      | Cytoskeletal |
| <b>P42768</b> | Wiskott-Aldrich syndrome protein (WASp).                                                                                                                                                                                  | Cytoskeletal |
| <b>Q9Y6U3</b> | Adseverin (Scinderin).                                                                                                                                                                                                    | Cytoskeletal |
| <b>Q05682</b> | Caldesmon (CDM).                                                                                                                                                                                                          | Cytoskeletal |
| <b>Q14118</b> | [Dystroglycan precursor (Dystrophin-associated glycoprotein 1), [Contains: Alpha-dystroglycan (Alpha-DG); Beta-dystroglycan (Beta-, DG)].]                                                                                | Cytoskeletal |
| <b>O95834</b> | Echinoderm microtubule-associated protein-like 2 (EMAP-2) (HuEMAP-2).                                                                                                                                                     | Cytoskeletal |
| <b>P58107</b> | Epiplakin (450 kDa epidermal antigen).                                                                                                                                                                                    | Cytoskeletal |
| <b>P46821</b> | [Microtubule-associated protein 1B (MAP 1B) [Contains: MAP1 light chain, LC1].]                                                                                                                                           | Cytoskeletal |
| <b>P10916</b> | [Myosin regulatory light chain 2, ventricular/cardiac muscle isoform, (MLC-2) (MLC-2v).]                                                                                                                                  | Cytoskeletal |
| <b>P35580</b> | [Myosin-10 (Myosin heavy chain 10) (Myosin heavy chain, nonmuscle IIb), (Nonmuscle myosin heavy chain IIb) (NMMHC II-b) (NMMHC-IIb) (Cellular, myosin heavy chain, type B) (Nonmuscle myosin heavy chain-B) (NMMHC-, B).] | Cytoskeletal |

|               |                                                                                                                                                                                                                                                            |              |
|---------------|------------------------------------------------------------------------------------------------------------------------------------------------------------------------------------------------------------------------------------------------------------|--------------|
| <b>Q15121</b> | [Astrocytic phosphoprotein PEA-15 (Phosphoprotein enriched in diabetes), (PED).]                                                                                                                                                                           | Cytoskeletal |
| <b>Q16825</b> | [Tyrosine-protein phosphatase non-receptor type 21 (EC 3.1.3.48), (Protein-tyrosine phosphatase D1).]                                                                                                                                                      | Cytoskeletal |
| <b>Q07283</b> | Trichohyalin.                                                                                                                                                                                                                                              | Cytoskeletal |
| <b>P50552</b> | Vasodilator-stimulated phosphoprotein (VASP).                                                                                                                                                                                                              | Cytoskeletal |
| <b>Q9Y6W5</b> | [Wiskott-Aldrich syndrome protein family member 2 (WASP-family protein, member 2) (Protein WAVE-2) (Verprolin homology domain-containing, protein 2).]                                                                                                     | Cytoskeletal |
| <b>P63104</b> | [14-3-3 protein zeta/delta (Protein kinase C inhibitor protein 1), (KCIP-1).]                                                                                                                                                                              | Cytosolic    |
| <b>P18848</b> | [Cyclic AMP-dependent transcription factor ATF-4 (Activating, transcription factor 4) (DNA-binding protein TAXREB67) (Cyclic AMP, response element-binding protein 2) (CREB2).]                                                                            | Cytosolic    |
| <b>P26641</b> | Elongation factor 1-gamma (EF-1-gamma) (eEF-1B gamma).                                                                                                                                                                                                     | Cytosolic    |
| <b>P06733</b> | [Alpha-enolase (EC 4.2.1.11) (2-phospho-D-glycerate hydro-lyase) (Non-, neural enolase) (NNE) (Enolase 1) (Phosphopyruvate hydratase) (C-myc, promoter-binding protein) (MBP-1) (MPB-1) (Plasminogen-binding, protein).]                                   | Cytosolic    |
| <b>Q14978</b> | [Nucleolar phosphoprotein p130 (Nucleolar 130 kDa protein) (140 kDa, nucleolar phosphoprotein) (Nopp140) (Nucleolar and coiled-body, phosphoprotein 1).]                                                                                                   | Cytosolic    |
| <b>P06733</b> | [Alpha-enolase (EC 4.2.1.11) (2-phospho-D-glycerate hydro-lyase) (Non-, neural enolase) (NNE) (Enolase 1) (Phosphopyruvate hydratase) (C-myc, promoter-binding protein) (MBP-1) (MPB-1) (Plasminogen-binding, protein).]                                   | Cytosolic    |
| <b>O95704</b> | [Amyloid beta A4 precursor protein-binding family B member 3 (Fe65-like, protein 2) (Fe65L2).]                                                                                                                                                             | Cytosolic    |
| <b>P41227</b> | [N-terminal acetyltransferase complex ARD1 subunit homolog A, (EC 2.3.1.88) (EC 2.3.1.-).]                                                                                                                                                                 | Cytosolic    |
| <b>Q01814</b> | [Plasma membrane calcium-transporting ATPase 2 (EC 3.6.3.8) (PMCA2), (Plasma membrane calcium pump isoform 2) (Plasma membrane calcium, ATPase isoform 2).]                                                                                                | Cytosolic    |
| <b>P56945</b> | [Breast cancer anti-estrogen resistance protein 1 (CRK-associated, substrate) (p130cas).]                                                                                                                                                                  | Cytosolic    |
| <b>Q14201</b> | [Protein BTG3 (Tob5 protein) (Abundant in neuroepithelium area, protein).]                                                                                                                                                                                 | Cytosolic    |
| <b>P07858</b> | [Cathepsin B precursor (EC 3.4.22.1) (Cathepsin B1) (APP secretase), (APPS) [Contains: Cathepsin B light chain; Cathepsin B heavy chain].]                                                                                                                 | Cytosolic    |
| <b>Q92793</b> | CREB-binding protein (EC 2.3.1.48).                                                                                                                                                                                                                        | Cytosolic    |
| <b>Q08499</b> | [cAMP-specific 3',5'-cyclic phosphodiesterase 4D (EC 3.1.4.17) (DPDE3), (PDE43).]                                                                                                                                                                          | Cytosolic    |
| <b>P06850</b> | [Corticoliberin precursor (Corticotropin-releasing factor) (CRF), (Corticotropin-releasing hormone).]                                                                                                                                                      | Cytosolic    |
| <b>P27797</b> | Calreticulin precursor (CRP55) (Calregulin) (HACBP) (ERp60) (grp60).                                                                                                                                                                                       | Cytosolic    |
| <b>Q9Y5K3</b> | [Choline-phosphate cytidyltransferase B (EC 2.7.7.15), (Phosphorylcholine transferase B) (CTP:phosphocholine, cytidyltransferase B) (CT B) (CCT B) (CCT-beta).]                                                                                            | Cytosolic    |
| <b>O00273</b> | [DNA fragmentation factor subunit alpha (DNA fragmentation factor 45, kDa subunit) (DFF-45) (Inhibitor of CAD) (ICAD).]                                                                                                                                    | Cytosolic    |
| <b>P00352</b> | [Retinal dehydrogenase 1 (EC 1.2.1.36) (RalDH1) (RALDH 1) (Aldehyde, dehydrogenase family 1 member A1) (Aldehyde dehydrogenase, cytosolic), (ALHDII) (ALDH-E1).]                                                                                           | Cytosolic    |
| <b>O43237</b> | [Cytoplasmic dynein 1 light intermediate chain 2 (Dynein light, intermediate chain 2, cytosolic) (LIC53/55) (LIC-2).]                                                                                                                                      | Cytosolic    |
| <b>O00418</b> | [Elongation factor 2 kinase (EC 2.7.11.20) (eEF-2 kinase) (eEF-2K), (Calcium/calmodulin-dependent eukaryotic elongation factor 2 kinase).]                                                                                                                 | Cytosolic    |
| <b>P14625</b> | [Endoplasmic precursor (Heat shock protein 90 kDa beta member 1) (94, kDa glucose-regulated protein) (GRP94) (gp96 homolog) (Tumor rejection, antigen 1).]                                                                                                 | Cytosolic    |
| <b>Q14289</b> | [Protein tyrosine kinase 2 beta (EC 2.7.10.2) (Focal adhesion kinase 2), (FADK 2) (Proline-rich tyrosine kinase 2) (Cell adhesion kinase beta), (CAK beta) (Calcium-dependent tyrosine kinase) (CADTK) (Related, adhesion focal tyrosine kinase) (RAFTK).] | Cytosolic    |

|               |                                                                                                                                                                                                                                                                  |           |
|---------------|------------------------------------------------------------------------------------------------------------------------------------------------------------------------------------------------------------------------------------------------------------------|-----------|
| <b>Q43524</b> | [Forkhead box protein O3A (Forkhead in rhabdomyosarcoma-like 1) (AF6q21, protein).]                                                                                                                                                                              | Cytosolic |
| <b>P04406</b> | Glyceraldehyde-3-phosphate dehydrogenase (EC 1.2.1.12) (GAPDH).                                                                                                                                                                                                  | Cytosolic |
| <b>P29992</b> | [Guanine nucleotide-binding protein subunit alpha-11 (G alpha-11), (Guanine nucleotide-binding protein G(y) subunit alpha).]                                                                                                                                     | Cytosolic |
| <b>P15170</b> | [G1 to S phase transition protein 1 homolog (GTP-binding protein GST1-, HS).]                                                                                                                                                                                    | Cytosolic |
| <b>Q92769</b> | Histone deacetylase 2 (HD2).                                                                                                                                                                                                                                     | Cytosolic |
| <b>P07900</b> | [Heat shock protein HSP 90-alpha (HSP 86) (Renal carcinoma antigen NY-, REN-38).]                                                                                                                                                                                | Cytosolic |
| <b>Q05084</b> | [Islet cell autoantigen 1 (69 kDa islet cell autoantigen) (ICA69) (p69), (Islet cell autoantigen p69) (ICAp69).]                                                                                                                                                 | Cytosolic |
| <b>Q92985</b> | Interferon regulatory factor 7 (IRF-7).                                                                                                                                                                                                                          | Cytosolic |
| <b>P13861</b> | cAMP-dependent protein kinase type II-alpha regulatory subunit.                                                                                                                                                                                                  | Cytosolic |
| <b>P19838</b> | [Nuclear factor NF-kappa-B p105 subunit (DNA-binding factor KBF1) (EBP-, 1) [Contains: Nuclear factor NF-kappa-B p50 subunit].]                                                                                                                                  | Cytosolic |
| <b>Q9NR64</b> | Kelch-like protein 1.                                                                                                                                                                                                                                            | Cytosolic |
| <b>P14618</b> | [Pyruvate kinase isozymes M1/M2 (EC 2.7.1.40) (Pyruvate kinase muscle, isozyme) (Pyruvate kinase 2/3) (Cytosolic thyroid hormone-binding, protein) (CTHBP) (THBP1).]                                                                                             | Cytosolic |
| <b>P07195</b> | [L-lactate dehydrogenase B chain (EC 1.1.1.27) (LDH-B) (LDH heart, subunit) (LDH-H) (Renal carcinoma antigen NY-REN-46).]                                                                                                                                        | Cytosolic |
| <b>O60318</b> | 80 kDa MCM3-associated protein (GANP protein).                                                                                                                                                                                                                   | Cytosolic |
| <b>Q9H000</b> | Makorin-2 (RING finger protein 62).                                                                                                                                                                                                                              | Cytosolic |
| <b>O14733</b> | [Dual specificity mitogen-activated protein kinase kinase 7, (EC 2.7.12.2) (MAP kinase kinase 7) (MAPKK 7) (MAPK/ERK kinase 7), (JNK-activating kinase 2) (c-Jun N-terminal kinase kinase 2) (JNK, kinase 2) (JNKK 2).]                                          | Cytosolic |
| <b>Q9Y411</b> | [Myosin-Va (Dilute myosin heavy chain, non-muscle) (Myosin-12) (Myosin, heavy chain 12) (Myoxin).]                                                                                                                                                               | Cytosolic |
| <b>Q9NX02</b> | [NACHT, LRR and PYD domains-containing protein 2 (PYRIN domain and, NACHT domain-containing protein 1) (PYRIN-containing APAF1-like, protein 2) (Nucleotide-binding site protein 1).]                                                                            | Cytosolic |
| <b>Q15080</b> | [Neutrophil cytosol factor 4 (NCF-4) (Neutrophil NADPH oxidase factor, 4) (p40-phox) (p40phox) (SH3 and PX domain-containing protein 4).]                                                                                                                        | Cytosolic |
| <b>Q9Y6K9</b> | [NF-kappa-B essential modulator (NEMO) (NF-kappa-B essential modifier), (Inhibitor of nuclear factor kappa-B kinase subunit gamma) (Ikb kinase, subunit gamma) (I-kappa-B kinase gamma) (IKK-gamma) (IKKG) (Ikb, kinase-associated protein 1) (IKKAP1) (FIP-3).] | Cytosolic |
| <b>O95757</b> | [Heat shock 70 kDa protein 4L (Osmotic stress protein 94) (Heat shock, 70-related protein APG-1).]                                                                                                                                                               | Cytosolic |
| <b>Q04671</b> | [P protein (Melanocyte-specific transporter protein) (Pink-eyed, dilution protein homolog).]                                                                                                                                                                     | Cytosolic |
| <b>P51003</b> | [Poly(A) polymerase alpha (EC 2.7.7.19) (PAP) (Polynucleotide, adenylyltransferase alpha).]                                                                                                                                                                      | Cytosolic |
| <b>Q15366</b> | Poly(rC)-binding protein 2 (Alpha-CP2) (hnRNP-E2).                                                                                                                                                                                                               | Cytosolic |
| <b>P32119</b> | [Peroxioredoxin-2 (EC 1.11.1.15) (Thioredoxin peroxidase 1), (Thioredoxin-dependent peroxide reductase 1) (Thiol-specific, antioxidant protein) (TSA) (PRP) (Natural killer cell-enhancing factor, B) (NKEF-B).]                                                 | Cytosolic |
| <b>Q9NQ66</b> | [1-phosphatidylinositol-4,5-bisphosphate phosphodiesterase beta 1, (EC 3.1.4.11) (Phosphoinositide phospholipase C) (Phospholipase C-, beta-1) (PLC-beta-1) (PLC-I) (PLC-154).]                                                                                  | Cytosolic |
| <b>P19174</b> | [1-phosphatidylinositol-4,5-bisphosphate phosphodiesterase gamma 1, (EC 3.1.4.11) (Phosphoinositide phospholipase C) (PLC-gamma-1), (Phospholipase C-gamma-1) (PLC-II) (PLC-148).]                                                                               | Cytosolic |
| <b>P29590</b> | [Probable transcription factor PML (Tripartite motif-containing protein, 19) (RING finger protein 71).]                                                                                                                                                          | Cytosolic |
| <b>P35998</b> | [26S protease regulatory subunit 7 (Proteasome 26S subunit ATPase 2), (Protein MSS1).]                                                                                                                                                                           | Cytosolic |
| <b>P35236</b> | [Tyrosine-protein phosphatase non-receptor type 7 (EC 3.1.3.48), (Protein-tyrosine phosphatase LC-PTP) (Hematopoietic protein-tyrosine, phosphatase) (HEPTP).]                                                                                                   | Cytosolic |

|               |                                                                                                                                                                                                                                                                                                                                                                                                |           |
|---------------|------------------------------------------------------------------------------------------------------------------------------------------------------------------------------------------------------------------------------------------------------------------------------------------------------------------------------------------------------------------------------------------------|-----------|
| <b>O95825</b> | [Quinone oxidoreductase-like 1 (EC 1.-.-) (QOH-1) (Zeta-crystallin, homolog) (4P11).]                                                                                                                                                                                                                                                                                                          | Cytosolic |
| <b>P82980</b> | Retinol-binding protein III, cellular (CRBP-III) (HRBPiso).                                                                                                                                                                                                                                                                                                                                    | Cytosolic |
| <b>P62888</b> | 60S ribosomal protein L30.                                                                                                                                                                                                                                                                                                                                                                     | Cytosolic |
| <b>P15880</b> | 40S ribosomal protein S2 (S4) (LLRep3 protein).                                                                                                                                                                                                                                                                                                                                                | Cytosolic |
| <b>P20936</b> | [Ras GTPase-activating protein 1 (GTPase-activating protein) (GAP) (Ras, p21 protein activator) (p120GAP) (RasGAP).]                                                                                                                                                                                                                                                                           | Cytosolic |
| <b>Q15436</b> | Protein transport protein Sec23A (SEC23-related protein A).                                                                                                                                                                                                                                                                                                                                    | Cytosolic |
| <b>P57772</b> | [Selenocysteine-specific elongation factor (Elongation factor sec), (Eukaryotic elongation factor, selenocysteine-tRNA-specific).]                                                                                                                                                                                                                                                             | Cytosolic |
| <b>Q9BT40</b> | [Skeletal muscle and kidney-enriched inositol phosphatase, (EC 3.1.3.56).]                                                                                                                                                                                                                                                                                                                     | Cytosolic |
| <b>O60493</b> | Sorting nexin-3 (Protein SDP3).                                                                                                                                                                                                                                                                                                                                                                | Cytosolic |
| <b>P08294</b> | [Extracellular superoxide dismutase [Cu-Zn] precursor (EC 1.15.1.1), (EC-SOD).]                                                                                                                                                                                                                                                                                                                | Cytosolic |
| <b>Q9NSD9</b> | [Phenylalanyl-tRNA synthetase beta chain (EC 6.1.1.20) (Phenylalanine--, tRNA ligase beta chain) (PheRS).]                                                                                                                                                                                                                                                                                     | Cytosolic |
| <b>P54136</b> | [Arginyl-tRNA synthetase, cytoplasmic (EC 6.1.1.19) (Arginine--tRNA, ligase) (ArgRS).]                                                                                                                                                                                                                                                                                                         | Cytosolic |
| <b>P54577</b> | [Tyrosyl-tRNA synthetase, cytoplasmic (EC 6.1.1.1) (Tyrosyl--tRNA, ligase) (TyrRS).]                                                                                                                                                                                                                                                                                                           | Cytosolic |
| <b>Q03519</b> | [Antigen peptide transporter 2 (APT2) (ATP-binding cassette sub-family, B member 3) (Peptide transporter TAP2) (Peptide transporter PSF2), (Peptide supply factor 2) (PSF-2) (Peptide transporter involved in, antigen processing 2).]                                                                                                                                                         | Cytosolic |
| <b>P78371</b> | T-complex protein 1 subunit beta (TCP-1-beta) (CCT-beta).                                                                                                                                                                                                                                                                                                                                      | Cytosolic |
| <b>P55072</b> | [Transitional endoplasmic reticulum ATPase (TER ATPase) (15S Mg(2+)-, ATPase p97 subunit) (Valosin-containing protein) (VCP).]                                                                                                                                                                                                                                                                 | Cytosolic |
| <b>P49815</b> | Tuberin (Tuberous sclerosis 2 protein).                                                                                                                                                                                                                                                                                                                                                        | Cytosolic |
| <b>Q13432</b> | Unc-119 protein homolog (Retinal protein 4) (HRG4).                                                                                                                                                                                                                                                                                                                                            | Cytosolic |
| <b>P40337</b> | Von Hippel-Lindau disease tumor suppressor (pVHL) (Protein G7).                                                                                                                                                                                                                                                                                                                                | Cytosolic |
| <b>O75436</b> | [Vacuolar protein sorting-associated protein 26A (Vesicle protein, sorting 26A) (hVPS26).]                                                                                                                                                                                                                                                                                                     | Cytosolic |
| <b>Q9NRL3</b> | Striatin-4 (Zinedin).                                                                                                                                                                                                                                                                                                                                                                          | Cytosolic |
| <b>Q16537</b> | [Serine/threonine-protein phosphatase 2A 56 kDa regulatory subunit, epsilon isoform (PP2A, B subunit, B' epsilon isoform) (PP2A, B, subunit, B56 epsilon isoform) (PP2A, B subunit, PR61 epsilon isoform), (PP2A, B subunit, R5 epsilon isoform).]                                                                                                                                             | Cytosolic |
| <b>P53582</b> | [Methionine aminopeptidase 1 (EC 3.4.11.18) (MetAP 1) (MAP 1), (Peptidase M 1).]                                                                                                                                                                                                                                                                                                               | Cytosolic |
| <b>Q99873</b> | [Protein arginine N-methyltransferase 1 (EC 2.1.1.-) (Interferon, receptor 1-bound protein 4).]                                                                                                                                                                                                                                                                                                | Cytosolic |
| <b>P02649</b> | Apolipoprotein E precursor (Apo-E).                                                                                                                                                                                                                                                                                                                                                            | Cytosolic |
| <b>P25098</b> | [Beta-adrenergic receptor kinase 1 (EC 2.7.11.15) (Beta-ARK-1) (G-, protein coupled receptor kinase 2).]                                                                                                                                                                                                                                                                                       | Cytosolic |
| <b>P49407</b> | Beta-arrestin-1 (Arrestin beta 1).                                                                                                                                                                                                                                                                                                                                                             | Cytosolic |
| <b>O00192</b> | Armadillo repeat protein deleted in velo-cardio-facial syndrome.                                                                                                                                                                                                                                                                                                                               | Cytosolic |
| <b>O95817</b> | [BAG family molecular chaperone regulator 3 (Bcl-2-associated, athanogene 3) (BAG-3) (Bcl-2-binding protein Bis) (Docking protein, CAIR-1).]                                                                                                                                                                                                                                                   | Cytosolic |
| <b>P19835</b> | [Bile salt-activated lipase precursor (EC 3.1.1.3) (EC 3.1.1.13) (BAL), (Bile salt-stimulated lipase) (BSSL) (Carboxyl ester lipase) (Sterol, esterase) (Cholesterol esterase) (Pancreatic lysophospholipase).]                                                                                                                                                                                | Cytosolic |
| <b>P50747</b> | [Biotin--protein ligase (EC 6.3.4.-) (Biotin apo-protein ligase), [Includes: Biotin--[methylmalonyl-CoA-carboxytransferase] ligase, (EC 6.3.4.9); Biotin--[propionyl-CoA-carboxylase [ATP-hydrolyzing]], ligase (EC 6.3.4.10) (Holocarboxylase synthetase) (HCS); Biotin--, [methylcrotonoyl-CoA-carboxylase] ligase (EC 6.3.4.11); Biotin--, [acetyl-CoA-carboxylase] ligase (EC 6.3.4.15)].] | Cytosolic |
| <b>P35070</b> | Probetacellulin precursor [Contains: Betacellulin (BTC)].                                                                                                                                                                                                                                                                                                                                      | Cytosolic |

|               |                                                                                                                                                                                                                                                                                                                                                                                                      |           |
|---------------|------------------------------------------------------------------------------------------------------------------------------------------------------------------------------------------------------------------------------------------------------------------------------------------------------------------------------------------------------------------------------------------------------|-----------|
| <b>Q14511</b> | [Enhancer of filamentation 1 (HEF1) (CRK-associated substrate-related, protein) (CAS-L) (CasL) (p105) (Protein NEDD9) (Renal carcinoma, antigen NY-REN-12) [Contains: Enhancer of filamentation 1 p55].]                                                                                                                                                                                             | Cytosolic |
| <b>P49454</b> | [Centromere protein F (Kinetochore protein CENP-F) (Mitotin) (AH, antigen).]                                                                                                                                                                                                                                                                                                                         | Cytosolic |
| <b>Q16280</b> | [Cyclic nucleotide-gated olfactory channel (Cyclic nucleotide-gated, cation channel 2) (CNG channel 2) (CNG-2) (CNG2).]                                                                                                                                                                                                                                                                              | Cytosolic |
| <b>P45877</b> | [Peptidyl-prolyl cis-trans isomerase C (EC 5.2.1.8) (PPIase) (Rotamase), (Cyclophilin C).]                                                                                                                                                                                                                                                                                                           | Cytosolic |
| <b>P16989</b> | [DNA-binding protein A (Cold shock domain-containing protein A), (Single-strand DNA-binding protein NF-GMB).]                                                                                                                                                                                                                                                                                        | Cytosolic |
| <b>Q9UMR2</b> | [ATP-dependent RNA helicase DDX19B (EC 3.6.1.-) (DEAD box protein 19B), (DEAD box RNA helicase DEAD5).]                                                                                                                                                                                                                                                                                              | Cytosolic |
| <b>Q08211</b> | [ATP-dependent RNA helicase A (EC 3.6.1.-) (Nuclear DNA helicase II), (NDH II) (DEAH box protein 9).]                                                                                                                                                                                                                                                                                                | Cytosolic |
| <b>Q12882</b> | [Dihydropyrimidine dehydrogenase [NADP+] precursor (EC 1.3.1.2) (DPD), (DHPDHase) (Dihydrouracil dehydrogenase) (Dihydrothymine, dehydrogenase).]                                                                                                                                                                                                                                                    | Cytosolic |
| <b>P54259</b> | Atrophin-1 (Dentatorubral-pallidoluysian atrophy protein).                                                                                                                                                                                                                                                                                                                                           | Cytosolic |
| <b>Q16828</b> | [Dual specificity protein phosphatase 6 (EC 3.1.3.48) (EC 3.1.3.16), (Mitogen-activated protein kinase phosphatase 3) (MAP kinase, phosphatase 3) (MKP-3) (Dual specificity protein phosphatase PYST1).]                                                                                                                                                                                             | Cytosolic |
| <b>Q14204</b> | [Dynein heavy chain, cytosolic (DYHC) (Cytoplasmic dynein heavy chain, 1) (DHC1) (Dynein heavy chain 1, cytoplasmic 1).]                                                                                                                                                                                                                                                                             | Cytosolic |
| <b>Q14203</b> | [Dynactin subunit 1 (150 kDa dynein-associated polypeptide) (DP-150), (DAP-150) (p150-glued) (p135).]                                                                                                                                                                                                                                                                                                | Cytosolic |
| <b>Q9HBU6</b> | Ethanolamine kinase 1 (EC 2.7.1.82) (EKI 1).                                                                                                                                                                                                                                                                                                                                                         | Cytosolic |
| <b>P62495</b> | [Eukaryotic peptide chain release factor subunit 1 (eRF1) (Eukaryotic, release factor 1) (TB3-1) (Protein C11).]                                                                                                                                                                                                                                                                                     | Cytosolic |
| <b>O00519</b> | [Fatty-acid amide hydrolase 1 (EC 3.1.-.-) (Oleamide hydrolase 1), (Anandamide amidohydrolase 1).]                                                                                                                                                                                                                                                                                                   | Cytosolic |
| <b>Q00597</b> | Fanconi anemia group C protein (Protein FACC).                                                                                                                                                                                                                                                                                                                                                       | Cytosolic |
| <b>Q92636</b> | [Protein FAN (Factor associated with N-SMase activation) (Factor, associated with neutral sphingomyelinase activation).]                                                                                                                                                                                                                                                                             | Cytosolic |
| <b>Q13630</b> | [GDP-L-fucose synthetase (EC 1.1.1.271) (Protein FX) (Red cell NADP(H)-, binding protein) (GDP-4-keto-6-deoxy-D-mannose-3,5-epimerase-4-, reductase).]                                                                                                                                                                                                                                               | Cytosolic |
| <b>P49771</b> | [SL cytokine precursor (Fms-related tyrosine kinase 3 ligand) (Flt3, ligand) (Flt3L).]                                                                                                                                                                                                                                                                                                               | Cytosolic |
| <b>P04066</b> | [Tissue alpha-L-fucosidase precursor (EC 3.2.1.51) (Alpha-L-fucosidase, I) (Alpha-L-fucoside fucohydrolase).]                                                                                                                                                                                                                                                                                        | Cytosolic |
| <b>O95749</b> | [Geranylgeranyl pyrophosphate synthetase (GGPP synthetase) (GGPPSase), (Geranylgeranyl diphosphate synthase) [Includes:, Dimethylallyltranstransferase (EC 2.5.1.1); Geranyltranstransferase, (EC 2.5.1.10); Farnesyltranstransferase (EC 2.5.1.29)].]                                                                                                                                               | Cytosolic |
| <b>P10071</b> | Zinc finger protein GLI3.                                                                                                                                                                                                                                                                                                                                                                            | Cytosolic |
| <b>P09211</b> | Glutathione S-transferase P (EC 2.5.1.18) (GST class-pi) (GSTP1-1).                                                                                                                                                                                                                                                                                                                                  | Cytosolic |
| <b>Q92598</b> | [Heat shock protein 105 kDa (Heat shock 110 kDa protein) (Antigen NY-, CO-25).]                                                                                                                                                                                                                                                                                                                      | Cytosolic |
| <b>Q9UQL6</b> | Histone deacetylase 5 (HD5) (Antigen NY-CO-9).                                                                                                                                                                                                                                                                                                                                                       | Cytosolic |
| <b>P51610</b> | [Host cell factor (HCF) (HCF-1) (C1 factor) (VP16 accessory protein), (VCAF) (CFF) [Contains: HCF N-terminal chain 1; HCF N-terminal chain, 2; HCF N-terminal chain 3; HCF N-terminal chain 4; HCF N-terminal, chain 5; HCF N-terminal chain 6; HCF C-terminal chain 1; HCF C-, terminal chain 2; HCF C-terminal chain 3; HCF C-terminal chain 4; HCF, C-terminal chain 5; HCF C-terminal chain 6].] | Cytosolic |
| <b>Q9H2X6</b> | Homeodomain-interacting protein kinase 2 (EC 2.7.11.1) (hHIPk2).                                                                                                                                                                                                                                                                                                                                     | Cytosolic |
| <b>P34913</b> | [Epoxide hydrolase 2 (EC 3.3.2.10) (Soluble epoxide hydrolase) (SEH), (Epoxide hydratase) (Cytosolic epoxide hydrolase) (CEH).]                                                                                                                                                                                                                                                                      | Cytosolic |
| <b>O00221</b> | [NF-kappa-B inhibitor epsilon (NF-kappa-BIE) (I-kappa-B-epsilon), (IkappaBepsilon) (IKB-epsilon) (IKBE).]                                                                                                                                                                                                                                                                                            | Cytosolic |
| <b>P52292</b> | [Importin subunit alpha-2 (Karyopherin subunit alpha-2) (SRP1-alpha), (RAG cohort protein 1).]                                                                                                                                                                                                                                                                                                       | Cytosolic |
| <b>P48200</b> | [Iron-responsive element-binding protein 2 (IRE-BP 2) (Iron regulatory, protein 2) (IRP2).]                                                                                                                                                                                                                                                                                                          | Cytosolic |

|               |                                                                                                                                                                                                                           |           |
|---------------|---------------------------------------------------------------------------------------------------------------------------------------------------------------------------------------------------------------------------|-----------|
| <b>P05783</b> | [Keratin, type I cytoskeletal 18 (Cytokeratin-18) (CK-18) (Keratin-18), (K18) (Cell proliferation-inducing gene 46 protein).]                                                                                             | Cytosolic |
| <b>O75912</b> | [Diacylglycerol kinase iota (EC 2.7.1.107) (Diglyceride kinase iota), (DGK-iota) (DAG kinase iota).]                                                                                                                      | Cytosolic |
| <b>Q92876</b> | [Kallikrein-6 precursor (EC 3.4.21.-) (Protease M) (Neurosin) (Zyme), (SP59) (Serine protease 9) (Serine protease 18).]                                                                                                   | Cytosolic |
| <b>Q15139</b> | [Serine/threonine-protein kinase D1 (EC 2.7.11.13) (nPKC-D1) (Protein, kinase D) (Protein kinase C mu type) (nPKC-mu).]                                                                                                   | Cytosolic |
| <b>P31749</b> | [RAC-alpha serine/threonine-protein kinase (EC 2.7.11.1) (RAC-PK-alpha), (Protein kinase B) (PKB) (C-AKT).]                                                                                                               | Cytosolic |
| <b>Q05469</b> | Hormone-sensitive lipase (EC 3.1.1.79) (HSL).                                                                                                                                                                             | Cytosolic |
| <b>P40925</b> | [Malate dehydrogenase, cytoplasmic (EC 1.1.1.37) (Cytosolic malate, dehydrogenase).]                                                                                                                                      | Cytosolic |
| <b>Q9UBF1</b> | [Melanoma-associated antigen C2 (MAGE-C2 antigen) (MAGE-E1 antigen), (Hepatocellular carcinoma-associated antigen 587) (Cancer-testis, antigen 10) (CT10).]                                                               | Cytosolic |
| <b>P53778</b> | [Mitogen-activated protein kinase 12 (EC 2.7.11.24) (Extracellular, signal-regulated kinase 6) (ERK-6) (ERK5) (Stress-activated protein, kinase 3) (Mitogen-activated protein kinase p38 gamma) (MAP kinase p38, gamma).] | Cytosolic |
| <b>P58340</b> | Myeloid leukemia factor 1 (Myelodysplasia-myeloid leukemia factor 1).                                                                                                                                                     | Cytosolic |
| <b>P06733</b> | [Alpha-enolase (EC 4.2.1.11) (2-phospho-D-glycerate hydro-lyase) (Non-, neural enolase) (NNE) (Enolase 1) (Phosphopyruvate hydratase) (C-myc, promoter-binding protein) (MBP-1) (MPB-1) (Plasminogen-binding, protein).]  | Cytosolic |
| <b>Q14764</b> | Major vault protein (MVP) (Lung resistance-related protein).                                                                                                                                                              | Cytosolic |
| <b>P16333</b> | [Cytoplasmic protein NCK1 (NCK adaptor protein 1) (SH2/SH3 adaptor, protein NCK-alpha).]                                                                                                                                  | Cytosolic |
| <b>Q13469</b> | [Nuclear factor of activated T-cells, cytoplasmic 2 (T-cell, transcription factor NFAT1) (NFAT pre-existing subunit) (NF-ATp).]                                                                                           | Cytosolic |
| <b>Q13287</b> | N-myc-interactor (Nmi) (N-myc and STAT interactor).                                                                                                                                                                       | Cytosolic |
| <b>O15130</b> | [FMRFamide-related peptides precursor [Contains: Neuropeptide SF, (NPSF); Neuropeptide FF (NPFF); Neuropeptide AF (NPAF)].]                                                                                               | Cytosolic |
| <b>P00973</b> | [2'-5'-oligoadenylate synthetase 1 (EC 2.7.7.-) ((2-5')oligo(A), synthetase 1) (2-5A synthetase 1) (p46/p42 OAS) (E18/E16).]                                                                                              | Cytosolic |
| <b>O15294</b> | [UDP-N-acetylglucosamine--peptide N-acetylglucosaminyltransferase 110, kDa subunit (EC 2.4.1.-) (O-GlcNAc transferase subunit p110) (O-linked, N-acetylglucosamine transferase 110 kDa subunit).]                         | Cytosolic |
| <b>P04637</b> | [Cellular tumor antigen p53 (Tumor suppressor p53) (Phosphoprotein p53), (Antigen NY-CO-13).]                                                                                                                             | Cytosolic |
| <b>Q99471</b> | Prefoldin subunit 5 (C-myc-binding protein Mm-1) (Myc modulator 1).                                                                                                                                                       | Cytosolic |
| <b>P62195</b> | [26S protease regulatory subunit 8 (Proteasome 26S subunit ATPase 5), (Proteasome subunit p45) (p45/SUG) (Thyroid hormone receptor-, interacting protein 1) (TRIP1).]                                                     | Cytosolic |
| <b>P55786</b> | Puromycin-sensitive aminopeptidase (EC 3.4.11.-) (PSA).                                                                                                                                                                   | Cytosolic |
| <b>Q03431</b> | [Parathyroid hormone/parathyroid hormone-related peptide receptor, precursor (PTH/PTHr receptor) (PTH/PTHrP type I receptor).]                                                                                            | Cytosolic |
| <b>P15151</b> | [Poliovirus receptor precursor (Nectin-like protein 5) (Necl-5) (CD155, antigen).]                                                                                                                                        | Cytosolic |
| <b>Q07020</b> | 60S ribosomal protein L18.                                                                                                                                                                                                | Cytosolic |
| <b>P05388</b> | 60S acidic ribosomal protein P0 (L10E).                                                                                                                                                                                   | Cytosolic |
| <b>P09651</b> | [Heterogeneous nuclear ribonucleoprotein A1 (Helix-destabilizing, protein) (Single-strand RNA-binding protein) (hnRNP core protein A1).]                                                                                  | Cytosolic |
| <b>Q9NQT5</b> | [Exosome complex exonuclease RRP40 (EC 3.1.13.-) (Ribosomal RNA-, processing protein 40) (Exosome component 3) (p10).]                                                                                                    | Cytosolic |
| <b>P62841</b> | 40S ribosomal protein S15 (RIG protein).                                                                                                                                                                                  | Cytosolic |
| <b>P23396</b> | 40S ribosomal protein S3.                                                                                                                                                                                                 | Cytosolic |
| <b>Q15019</b> | Septin-2 (Protein NEDD5).                                                                                                                                                                                                 | Cytosolic |
| <b>O95219</b> | Sorting nexin-4.                                                                                                                                                                                                          | Cytosolic |

|               |                                                                                                                                                                                                                   |           |
|---------------|-------------------------------------------------------------------------------------------------------------------------------------------------------------------------------------------------------------------|-----------|
| <b>Q9NRS6</b> | Sorting nexin-15.                                                                                                                                                                                                 | Cytosolic |
| <b>Q9NYA1</b> | Sphingosine kinase 1 (EC 2.7.1.-) (SK 1) (SPK 1).                                                                                                                                                                 | Cytosolic |
| <b>Q15528</b> | [Mediator of RNA polymerase II transcription subunit 22 (Mediator, complex subunit 22) (Surfeit locus protein 5).]                                                                                                | Cytosolic |
| <b>P14868</b> | [Aspartyl-tRNA synthetase, cytoplasmic (EC 6.1.1.12) (Aspartate--tRNA, ligase) (AspRS) (Cell proliferation-inducing gene 40 protein).]                                                                            | Cytosolic |
| <b>P41250</b> | Glycyl-tRNA synthetase (EC 6.1.1.14) (Glycine--tRNA ligase) (GlyRS).                                                                                                                                              | Cytosolic |
| <b>P26640</b> | [Valyl-tRNA synthetase (EC 6.1.1.9) (Valine--tRNA ligase) (ValRS), (Protein G7a).]                                                                                                                                | Cytosolic |
| <b>Q12815</b> | Trophinin-associated protein (Tastin) (Trophinin-assisting protein).                                                                                                                                              | Cytosolic |
| <b>O75347</b> | [Tubulin-specific chaperone A (Tubulin-folding cofactor A) (CFA) (TCP1-, chaperonin cofactor A).]                                                                                                                 | Cytosolic |
| <b>P50990</b> | [T-complex protein 1 subunit theta (TCP-1-theta) (CCT-theta) (Renal, carcinoma antigen NY-REN-15).]                                                                                                               | Cytosolic |
| <b>Q9Y6MO</b> | [Testisin precursor (EC 3.4.21.-) (Serine protease 21) (Eosinophil, serine protease 1) (ESP-1).]                                                                                                                  | Cytosolic |
| <b>Q04206</b> | Transcription factor p65 (Nuclear factor NF-kappa-B p65 subunit).                                                                                                                                                 | Cytosolic |
| <b>P29144</b> | [Tripeptidyl-peptidase 2 (EC 3.4.14.10) (Tripeptidyl-peptidase II), (TPP-II) (Tripeptidyl aminopeptidase).]                                                                                                       | Cytosolic |
| <b>P26651</b> | [Tristetraproline (TTP) (Zinc finger protein 36 homolog) (Zfp-36), (Protein TIS11A) (TIS11) (Growth factor-inducible nuclear protein, NUP475) (G0/G1 switch regulatory protein 24).]                              | Cytosolic |
| <b>P40126</b> | [L-dopachrome tautomerase precursor (EC 5.3.3.12) (DT) (DCT) (L-, dopachrome Delta-isomerase) (Tyrosinase-related protein 2) (TRP-2), (TRP2).]                                                                    | Cytosolic |
| <b>P52758</b> | [Ribonuclease UK114 (EC 3.1.-.-) (14.5 kDa translational inhibitor, protein) (p14.5) (UK114 antigen homolog).]                                                                                                    | Cytosolic |
| <b>P30153</b> | [Serine/threonine-protein phosphatase 2A 65 kDa regulatory subunit A, alpha isoform (PP2A, subunit A, PR65-alpha isoform) (PP2A, subunit A,, R1-alpha isoform) (Medium tumor antigen-associated 61 kDa protein).] | Cytosolic |
| <b>Q9Y6B7</b> | [AP-4 complex subunit beta-1 (Adapter-related protein complex 4 beta 1, subunit) (Beta subunit of AP-4) (AP-4 adapter complex subunit beta).]                                                                     | Cytosolic |
| <b>P61163</b> | [Alpha-centractin (Centractin) (Centrosome-associated actin homolog), (Actin-RPV) (ARP1).]                                                                                                                        | Cytosolic |
| <b>P00326</b> | [Alcohol dehydrogenase 1C (EC 1.1.1.1) (Alcohol dehydrogenase gamma, subunit).]                                                                                                                                   | Cytosolic |
| <b>P50579</b> | [Methionine aminopeptidase 2 (EC 3.4.11.18) (MetAP 2) (Peptidase M 2), (Initiation factor 2-associated 67 kDa glycoprotein) (p67) (p67eIF2).]                                                                     | Cytosolic |
| <b>P10275</b> | Androgen receptor (Dihydrotestosterone receptor).                                                                                                                                                                 | Cytosolic |
| <b>Q15052</b> | [Rho guanine nucleotide exchange factor 6 (Rac/Cdc42 guanine nucleotide, exchange factor 6) (PAK-interacting exchange factor alpha) (Alpha-Pix), (COOL-2).]                                                       | Cytosolic |
| <b>O43681</b> | [Arsenical pump-driving ATPase (EC 3.6.3.16) (Arsenite-translocating, ATPase) (Arsenical resistance ATPase) (Arsenite-transporting ATPase), (ARSA) (ASNA-I).]                                                     | Cytosolic |
| <b>P00918</b> | [Carbonic anhydrase 2 (EC 4.2.1.1) (Carbonic anhydrase II) (Carbonate, dehydratase II) (CA-II) (Carbonic anhydrase C).]                                                                                           | Cytosolic |
| <b>P35520</b> | [Cystathionine beta-synthase (EC 4.2.1.22) (Serine sulfhydrase) (Beta-, thionase).]                                                                                                                               | Cytosolic |
| <b>P27815</b> | [cAMP-specific 3',5'-cyclic phosphodiesterase 4A (EC 3.1.4.17) (DPDE2), (PDE46).]                                                                                                                                 | Cytosolic |
| <b>P02511</b> | [Alpha-crystallin B chain (Alpha(B)-crystallin) (Rosenthal fiber, component) (Heat shock protein beta-5) (HspB5) (Renal carcinoma, antigen NY-REN-27).]                                                           | Cytosolic |
| <b>P46108</b> | Proto-oncogene C-crk (p38) (Adapter molecule crk).                                                                                                                                                                | Cytosolic |
| <b>P41240</b> | [Tyrosine-protein kinase CSK (EC 2.7.10.2) (C-SRC kinase) (Protein-, tyrosine kinase CYL).]                                                                                                                       | Cytosolic |



|               |                                                                                                                                                                                                                                                                                       |           |
|---------------|---------------------------------------------------------------------------------------------------------------------------------------------------------------------------------------------------------------------------------------------------------------------------------------|-----------|
| <b>P49585</b> | [Choline-phosphate cytidyltransferase A (EC 2.7.7.15), (Phosphorylcholine transferase A) (CTP:phosphocholine, cytidyltransferase A) (CT A) (CCT A) (CCT-alpha).]                                                                                                                      | Cytosolic |
| <b>P62937</b> | [Peptidyl-prolyl cis-trans isomerase A (EC 5.2.1.8) (PPIase A), (Rotamase A) (Cyclophilin A) (Cyclosporin A-binding protein).]                                                                                                                                                        | Cytosolic |
| <b>Q99259</b> | [Glutamate decarboxylase 1 (EC 4.1.1.15) (Glutamate decarboxylase 67, kDa isoform) (GAD-67) (67 kDa glutamic acid decarboxylase).]                                                                                                                                                    | Cytosolic |
| <b>Q9UHI6</b> | [Probable ATP-dependent RNA helicase DDX20 (EC 3.6.1.-) (DEAD box, protein 20) (DEAD box protein DP 103) (Component of gems 3) (Gemin-3).]                                                                                                                                            | Cytosolic |
| <b>O00571</b> | [ATP-dependent RNA helicase DDX3X (EC 3.6.1.-) (DEAD box protein 3, X-, chromosomal) (Helicase-like protein 2) (HLP2) (DEAD box, X isoform).]                                                                                                                                         | Cytosolic |
| <b>P06746</b> | DNA polymerase beta (EC 2.7.7.7) (EC 4.2.99.-).                                                                                                                                                                                                                                       | Cytosolic |
| <b>O14640</b> | [Segment polarity protein dishevelled homolog DVL-1 (Dishevelled-1), (DSH homolog 1).]                                                                                                                                                                                                | Cytosolic |
| <b>P06733</b> | [Alpha-enolase (EC 4.2.1.11) (2-phospho-D-glycerate hydro-lyase) (Non-, neural enolase) (NNE) (Enolase 1) (Phosphopyruvate hydratase) (C-myc, promoter-binding protein) (MBP-1) (MPB-1) (Plasminogen-binding, protein).]                                                              | Cytosolic |
| <b>Q92990</b> | [Glomulin (FKBP-associated protein) (FK506-binding protein-associated, protein) (FAP).]                                                                                                                                                                                               | Cytosolic |
| <b>P14314</b> | [Glucosidase 2 subunit beta precursor (Glucosidase II subunit beta), (Protein kinase C substrate, 60.1 kDa protein, heavy chain) (PKCSH), (80K-H protein).]                                                                                                                           | Cytosolic |
| <b>O60547</b> | [GDP-mannose 4,6 dehydratase (EC 4.2.1.47) (GDP-D-mannose dehydratase), (GMD).]                                                                                                                                                                                                       | Cytosolic |
| <b>Q12849</b> | G-rich sequence factor 1 (GRSF-1).                                                                                                                                                                                                                                                    | Cytosolic |
| <b>Q9Y2T3</b> | [Guanine deaminase (EC 3.5.4.3) (Guanase) (Guanine aminase) (Guanine, aminohydrolase) (GAH) (p51-nedasin).]                                                                                                                                                                           | Cytosolic |
| <b>Q30201</b> | Hereditary hemochromatosis protein precursor (HLA-H).                                                                                                                                                                                                                                 | Cytosolic |
| <b>O95163</b> | [Elongator complex protein 1 (ELP1) (IkappaB kinase complex-associated, protein) (IKK complex-associated protein) (p150).]                                                                                                                                                            | Cytosolic |
| <b>Q13418</b> | [Integrin-linked protein kinase (EC 2.7.11.1) (ILK-1) (ILK-2) (59 kDa, serine/threonine-protein kinase) (p59ILK).]                                                                                                                                                                    | Cytosolic |
| <b>Q14974</b> | [Importin subunit beta-1 (Karyopherin subunit beta-1) (Nuclear factor, P97) (Importin 90).]                                                                                                                                                                                           | Cytosolic |
| <b>Q15181</b> | [Inorganic pyrophosphatase (EC 3.6.1.1) (Pyrophosphate phospho-, hydrolase) (PPase).]                                                                                                                                                                                                 | Cytosolic |
| <b>Q16760</b> | [Diacylglycerol kinase delta (EC 2.7.1.107) (Diglyceride kinase delta), (DGK-delta) (DAG kinase delta) (130 kDa diacylglycerol kinase).]                                                                                                                                              | Cytosolic |
| <b>O95239</b> | Chromosome-associated kinesin KIF4A (Chromokinesin A).                                                                                                                                                                                                                                | Cytosolic |
| <b>P53667</b> | LIM domain kinase 1 (EC 2.7.11.1) (LIMK-1).                                                                                                                                                                                                                                           | Cytosolic |
| <b>P48163</b> | NADP-dependent malic enzyme (EC 1.1.1.40) (NADP-ME) (Malic enzyme 1).                                                                                                                                                                                                                 | Cytosolic |
| <b>P14209</b> | [CD99 antigen precursor (T-cell surface glycoprotein E2) (E2 antigen), (Protein MIC2) (12E7).]                                                                                                                                                                                        | Cytosolic |
| <b>Q9NPJ1</b> | [McKusick-Kaufman/Bardet-Biedl syndromes putative chaperonin (Bardet-, Biedl syndrome 6 protein).]                                                                                                                                                                                    | Cytosolic |
| <b>Q13402</b> | Myosin-VIIa.                                                                                                                                                                                                                                                                          | Cytosolic |
| <b>P14598</b> | [Neutrophil cytosol factor 1 (NCF-1) (Neutrophil NADPH oxidase factor, 1) (47 kDa neutrophil oxidase factor) (p47-phox) (NCF-47K) (47 kDa, autosomal chronic granulomatous disease protein) (Nox organizer 2), (Nox-organizing protein 2) (SH3 and PX domain-containing protein 1A).] | Cytosolic |
| <b>P30990</b> | [Neurotensin/neuromedin N precursor [Contains: Large neuromedin N (NmN-, 125); Neuromedin N (NmN) (NN); Neurotensin (NT); Tail peptide].]                                                                                                                                             | Cytosolic |
| <b>P08949</b> | Neuromedin-B precursor [Contains: Neuromedin-B-32; Neuromedin-B].]                                                                                                                                                                                                                    | Cytosolic |
| <b>P37198</b> | Nuclear pore glycoprotein p62 (62 kDa nucleoporin).                                                                                                                                                                                                                                   | Cytosolic |

|               |                                                                                                                                                                                                 |           |
|---------------|-------------------------------------------------------------------------------------------------------------------------------------------------------------------------------------------------|-----------|
| <b>P51810</b> | G-protein coupled receptor 143 (Ocular albinism type 1 protein).                                                                                                                                | Cytosolic |
| <b>Q9BXW6</b> | [Oxysterol-binding protein-related protein 1 (OSBP-related protein 1), (ORP-1).]                                                                                                                | Cytosolic |
| <b>Q12888</b> | [Tumor suppressor p53-binding protein 1 (p53-binding protein 1), (p53BP1) (53BP1).]                                                                                                             | Cytosolic |
| <b>Q13153</b> | [Serine/threonine-protein kinase PAK 1 (EC 2.7.11.1) (p21-activated, kinase 1) (PAK-1) (p65-PAK) (Alpha-PAK).]                                                                                  | Cytosolic |
| <b>O15530</b> | 3-phosphoinositide-dependent protein kinase 1 (EC 2.7.11.1) (hPDK1).                                                                                                                            | Cytosolic |
| <b>Q13608</b> | [Peroxisome assembly factor 2 (PAF-2) (Peroxisomal-type ATPase 1), (Peroxin-6) (Peroxisomal biogenesis factor 6).]                                                                              | Cytosolic |
| <b>P35354</b> | [Prostaglandin G/H synthase 2 precursor (EC 1.14.99.1) (Cyclooxygenase-, 2) (COX-2) (Prostaglandin-endoperoxide synthase 2) (Prostaglandin H2, synthase 2) (PGH synthase 2) (PGHS-2) (PHS II).] | Cytosolic |
| <b>P51178</b> | [1-phosphatidylinositol-4,5-bisphosphate phosphodiesterase delta 1, (EC 3.1.4.11) (Phosphoinositide phospholipase C) (PLC-delta-1), (Phospholipase C-delta-1) (PLC-III).]                       | Cytosolic |
| <b>O00750</b> | [Phosphatidylinositol-4-phosphate 3-kinase C2 domain-containing beta, polypeptide (EC 2.7.1.154) (Phosphoinositide 3-Kinase-C2-beta), (PtdIns-3-kinase C2 beta) (PI3K-C2beta) (C2-PI3K).]       | Cytosolic |
| <b>P13796</b> | [Plastin-2 (L-plastin) (Lymphocyte cytosolic protein 1) (LCP-1), (LC64P).]                                                                                                                      | Cytosolic |
| <b>Q05209</b> | [Tyrosine-protein phosphatase non-receptor type 12 (EC 3.1.3.48), (Protein-tyrosine phosphatase G1) (PTPG1) (PTP-PEST).]                                                                        | Cytosolic |
| <b>P53801</b> | [Pituitary tumor-transforming gene 1 protein-interacting protein, precursor (Pituitary tumor-transforming gene protein-binding factor), (PTTG-binding factor) (PBF).]                           | Cytosolic |
| <b>O15067</b> | [Phosphoribosylformylglycinamide synthase (EC 6.3.5.3) (FGAM, synthase) (FGAMS) (Formylglycinamide ribotide amidotransferase), (FGARAT) (Formylglycinamide ribotide synthetase).]               | Cytosolic |
| <b>P61106</b> | Ras-related protein Rab-14.                                                                                                                                                                     | Cytosolic |
| <b>Q02543</b> | 60S ribosomal protein L18a.                                                                                                                                                                     | Cytosolic |
| <b>P62269</b> | 40S ribosomal protein S18 (Ke-3) (Ke3).                                                                                                                                                         | Cytosolic |
| <b>P62241</b> | 40S ribosomal protein S8.                                                                                                                                                                       | Cytosolic |
| <b>P23526</b> | [Adenosylhomocysteinase (EC 3.3.1.1) (S-adenosyl-L-homocysteine, hydrolase) (AdoHcyase).]                                                                                                       | Cytosolic |
| <b>P48594</b> | Serpin B4 (Squamous cell carcinoma antigen 2) (SCCA-2) (Leupin).                                                                                                                                | Cytosolic |
| <b>P55822</b> | [SH3 domain-binding glutamic acid-rich protein (SH3BGR protein) (21-, glutamic acid-rich protein) (21-GARP).]                                                                                   | Cytosolic |
| <b>O14893</b> | [Survival of motor neuron protein-interacting protein 1 (SMN-, interacting protein 1) (Component of gems 2) (Gemin-2).]                                                                         | Cytosolic |
| <b>P57059</b> | [Serine/threonine-protein kinase SNF1-like kinase 1 (EC 2.7.11.1), (Serine/threonine-protein kinase SNF1LK) (SIK1).]                                                                            | Cytosolic |
| <b>O60749</b> | Sorting nexin-2 (Transformation-related gene 9 protein) (TRG-9).                                                                                                                                | Cytosolic |
| <b>P42224</b> | [Signal transducer and activator of transcription 1-alpha/beta, (Transcription factor ISGF-3 components p91/p84).]                                                                              | Cytosolic |
| <b>P07814</b> | [Bifunctional aminoacyl-tRNA synthetase [Includes: Glutamyl-tRNA, synthetase (EC 6.1.1.17) (Glutamate--tRNA ligase); Prolyl-tRNA, synthetase (EC 6.1.1.15) (Proline--tRNA ligase)].]            | Cytosolic |
| <b>P41252</b> | [Isoleucyl-tRNA synthetase, cytoplasmic (EC 6.1.1.5) (Isoleucine--tRNA, ligase) (IleRS) (IRS).]                                                                                                 | Cytosolic |
| <b>P26639</b> | [Threonyl-tRNA synthetase, cytoplasmic (EC 6.1.1.3) (Threonine--tRNA, ligase) (ThrRS).]                                                                                                         | Cytosolic |
| <b>P23381</b> | [Tryptophanyl-tRNA synthetase, cytoplasmic (EC 6.1.1.2) (Tryptophan--, tRNA ligase) (TrpRS) (Interferon-induced protein 53) (IFP53) (hWRS).]                                                    | Cytosolic |
| <b>Q99593</b> | T-box transcription factor TBX5 (T-box protein 5).                                                                                                                                              | Cytosolic |
| <b>P17987</b> | T-complex protein 1 subunit alpha (TCP-1-alpha) (CCT-alpha).                                                                                                                                    | Cytosolic |
| <b>P22105</b> | Tenascin-X precursor (TN-X) (Hexabrachion-like protein).                                                                                                                                        | Cytosolic |
| <b>P12270</b> | Nucleoprotein TPR.                                                                                                                                                                              | Cytosolic |

|               |                                                                                                                                                                                                                                                     |           |
|---------------|-----------------------------------------------------------------------------------------------------------------------------------------------------------------------------------------------------------------------------------------------------|-----------|
| <b>P08670</b> | Vimentin.                                                                                                                                                                                                                                           | Cytosolic |
| <b>Q99871</b> | [UCHL5-interacting protein (26S proteasome-associated UCH37-interacting, protein 1) (X-linked protein STS1769).]                                                                                                                                    | Cytosolic |
| <b>Q14684</b> | RRP1-like protein B.                                                                                                                                                                                                                                | Cytosolic |
| <b>Q9UBR2</b> | Cathepsin Z precursor (EC 3.4.22.-) (Cathepsin X) (Cathepsin P).                                                                                                                                                                                    | ER        |
| <b>P20813</b> | Cytochrome P450 2B6 (EC 1.14.14.1) (CYP11B6) (P450 I1B1).                                                                                                                                                                                           | ER        |
| <b>P49184</b> | [Deoxyribonuclease I-like 1 precursor (EC 3.1.21.-) (DNase I-like 1), (Muscle-specific DNase I-like) (DNase X) (XIB).]                                                                                                                              | ER        |
| <b>P33908</b> | [Mannosyl-oligosaccharide 1,2-alpha-mannosidase IA (EC 3.2.1.113), (Processing alpha-1,2-mannosidase IA) (Alpha-1,2-mannosidase IA), (Mannosidase alpha class 1A member 1) (Man9)-alpha-mannosidase), (Man9-mannosidase).]                          | ER        |
| <b>P16435</b> | NADPH--cytochrome P450 reductase (EC 1.6.2.4) (CPR) (P450R).                                                                                                                                                                                        | ER        |
| <b>Q13087</b> | Protein disulfide-isomerase A2 precursor (EC 5.3.4.1) (PD1p).                                                                                                                                                                                       | ER        |
| <b>P22061</b> | [Protein-L-isoaspartate(D-aspartate) O-methyltransferase (EC 2.1.1.77), (Protein-beta-aspartate methyltransferase) (PIMT) (Protein L-, isoaspartyl/D-aspartyl methyltransferase) (L-isoaspartyl protein, carboxyl methyltransferase).]              | ER        |
| <b>PO4156</b> | [Major prion protein precursor (PrP) (PrP27-30) (PrP33-35C) (ASCR), (CD230 antigen).]                                                                                                                                                               | ER        |
| <b>P10619</b> | [Lysosomal protective protein precursor (EC 3.4.16.5) (Cathepsin A), (Carboxypeptidase C) (Protective protein for beta-galactosidase), [Contains: Lysosomal protective protein 32 kDa chain; Lysosomal, protective protein 20 kDa chain].]          | ER        |
| <b>PO4275</b> | [von Willebrand factor precursor (vWF) [Contains: von Willebrand, antigen 2 (von Willebrand antigen II)].]                                                                                                                                          | ER        |
| <b>O43264</b> | Centromere/kinetochore protein zw10 homolog.                                                                                                                                                                                                        | ER        |
| <b>Q99541</b> | Adipophilin (Adipose differentiation-related protein) (ADRP).                                                                                                                                                                                       | ER        |
| <b>PO4114</b> | [Apolipoprotein B-100 precursor (Apo B-100) [Contains: Apolipoprotein, B-48 (Apo B-48)].]                                                                                                                                                           | ER        |
| <b>PO2654</b> | Apolipoprotein C-I precursor (Apo-CI) (ApoC-I).                                                                                                                                                                                                     | ER        |
| <b>Q9Y2C3</b> | [Beta-1,3-galactosyltransferase 5 (EC 2.4.1.-) (Beta-1,3-GalTase 5), (Beta3Gal-T5) (b3Gal-T5) (UDP-galactose:beta-N-acetylglucosamine beta-, 1,3-galactosyltransferase 5) (UDP-Gal:beta-GlcNAc beta-1,3-, galactosyltransferase 5) (Beta-3-Gx-T5).] | ER        |
| <b>O43852</b> | Calumenin precursor (Crocabin) (IEF SSP 9302).                                                                                                                                                                                                      | ER        |
| <b>Q9Y6A2</b> | [Cytochrome P450 46A1 (EC 1.14.13.98) (Cholesterol 24-hydroxylase), (CH24H).]                                                                                                                                                                       | ER        |
| <b>Q15392</b> | [24-dehydrocholesterol reductase precursor (EC 1.3.1.-) (3-beta-, hydroxysterol delta-24-reductase) (Seladin-1) (Diminuto/dwarf1, homolog).]                                                                                                        | ER        |
| <b>P49257</b> | [Protein ERGIC-53 precursor (ER-Golgi intermediate compartment 53 kDa, protein) (Lectin mannose-binding 1) (Gp58) (Intracellular mannose-, specific lectin MR60).]                                                                                  | ER        |
| <b>Q13724</b> | [Mannosyl-oligosaccharide glucosidase (EC 3.2.1.106) (Processing A-, glucosidase I).]                                                                                                                                                               | ER        |
| <b>O60725</b> | [Protein-S-isoprenylcysteine O-methyltransferase (EC 2.1.1.100), (Isoprenylcysteine carboxylmethyltransferase) (Prenylcysteine carboxyl, methyltransferase) (pcCMT) (Prenylated protein carboxyl, methyltransferase) (PPMT).]                       | ER        |
| <b>Q14643</b> | [Inositol 1,4,5-trisphosphate receptor type 1 (Type 1 inositol 1,4,5-, trisphosphate receptor) (Type 1 InsP3 receptor) (IP3 receptor isoform, 1) (InsP3R1) (IP3R).]                                                                                 | ER        |
| <b>Q99828</b> | [Calcium and integrin-binding protein 1 (Calmyrin) (DNA-PKcs-, interacting protein) (Kinase-interacting protein) (KIP) (CIB) (SNK-, interacting protein 2-28) (SIP2-28).]                                                                           | ER        |
| <b>O15118</b> | Niemann-Pick C1 protein precursor.                                                                                                                                                                                                                  | ER        |
| <b>P30101</b> | [Protein disulfide-isomerase A3 precursor (EC 5.3.4.1) (Disulfide, isomerase ER-60) (ERp60) (58 kDa microsomal protein) (p58) (ERp57) (58, kDa glucose-regulated protein).]                                                                         | ER        |
| <b>Q16799</b> | Reticulon-1 (Neuroendocrine-specific protein).                                                                                                                                                                                                      | ER        |

|               |                                                                                                                                                                                                                                                                                                                     |               |
|---------------|---------------------------------------------------------------------------------------------------------------------------------------------------------------------------------------------------------------------------------------------------------------------------------------------------------------------|---------------|
| <b>Q12770</b> | [Sterol regulatory element-binding protein cleavage-activating protein, (SREBP cleavage-activating protein) (SCAP).]                                                                                                                                                                                                | ER            |
| <b>P43307</b> | [Translocon-associated protein subunit alpha precursor (TRAP-alpha), (Signal sequence receptor subunit alpha) (SSR-alpha).]                                                                                                                                                                                         | ER            |
| <b>P08842</b> | [Steryl-sulfatase precursor (EC 3.1.6.2) (Steroid sulfatase) (Steryl-, sulfate sulfohydrolase) (Arylsulfatase C) (ASC).]                                                                                                                                                                                            | ER            |
| <b>O14975</b> | [Very long-chain acyl-CoA synthetase (EC 6.2.1.-) (VLCS) (Very long-, chain-fatty-acid-CoA ligase) (VLACS) (THCA-CoA ligase) (Fatty-acid-, coenzyme A ligase, very long-chain 1) (Long-chain-fatty-acid--CoA, ligase) (EC 6.2.1.3) (Fatty acid transport protein 2) (FATP-2) (Solute, carrier family 27 member 2).] | ER            |
| <b>P27695</b> | [DNA-(apurinic or apyrimidinic site) lyase (EC 4.2.99.18) (AP, endonuclease 1) (APEX nuclease) (APEN) (Protein REF-1).]                                                                                                                                                                                             | ER            |
| <b>P16615</b> | [Sarcoplasmic/endoplasmic reticulum calcium ATPase 2 (EC 3.6.3.8), (Calcium pump 2) (SERCA2) (SR Ca(2+)-ATPase 2) (Calcium-transporting, ATPase sarcoplasmic reticulum type, slow twitch skeletal muscle, isoform) (Endoplasmic reticulum class 1/2 Ca(2+) ATPase).]                                                | ER            |
| <b>P27824</b> | [Calnexin precursor (Major histocompatibility complex class I antigen-, binding protein p88) (p90) (IP90).]                                                                                                                                                                                                         | ER            |
| <b>O75503</b> | Ceroid-lipofuscinosis neuronal protein 5 (Protein CLN5).                                                                                                                                                                                                                                                            | ER            |
| <b>P05093</b> | [Cytochrome P450 17A1 (EC 1.14.99.9) (CYPXVII) (P450-C17) (P450c17), (Steroid 17-alpha-monooxygenase) (Steroid 17-alpha-hydroxylase/17,20, lyase).]                                                                                                                                                                 | ER            |
| <b>Q14571</b> | [Inositol 1,4,5-trisphosphate receptor type 2 (Type 2 inositol 1,4,5-, trisphosphate receptor) (Type 2 InsP3 receptor) (IP3 receptor isoform, 2) (InsP3R2).]                                                                                                                                                        | ER            |
| <b>O43896</b> | Kinesin-like protein KIF1C.                                                                                                                                                                                                                                                                                         | ER            |
| <b>Q92581</b> | [Sodium/hydrogen exchanger 6 (Na(+)/H(+) exchanger 6) (NHE-6) (Solute, carrier family 9 member 6).]                                                                                                                                                                                                                 | ER            |
| <b>O60238</b> | [BCL2/adenovirus E1B 19 kDa protein-interacting protein 3-like (NIP3L), (NIP3-like protein X) (BCL2/adenovirus E1B 19 kDa protein-interacting, protein 3A) (Adenovirus E1B19K-binding protein B5).]                                                                                                                 | ER            |
| <b>Q9Y4L1</b> | [Hypoxia up-regulated protein 1 precursor (150 kDa oxygen-regulated, protein) (Orp150).]                                                                                                                                                                                                                            | ER            |
| <b>P13667</b> | [Protein disulfide-isomerase A4 precursor (EC 5.3.4.1) (Protein ERp-72), (ERp72).]                                                                                                                                                                                                                                  | ER            |
| <b>O00469</b> | [Procollagen-lysine,2-oxoglutarate 5-dioxygenase 2 precursor, (EC 1.14.11.4) (Lysyl hydroxylase 2) (LH2).]                                                                                                                                                                                                          | ER            |
| <b>Q9NQC3</b> | [Reticulon-4 (Neurite outgrowth inhibitor) (Nogo protein) (Foocen), (Neuroendocrine-specific protein) (NSP) (Neuroendocrine-specific, protein C homolog) (RTN-x) (Reticulon-5).]                                                                                                                                    | ER            |
| <b>Q01105</b> | [Protein SET (Phosphatase 2A inhibitor I2PP2A) (I-2PP2A) (Template-, activating factor I) (TAF-I) (HLA-DR-associated protein II) (PHAPII), (Inhibitor of granzyme A-activated DNase) (IGAAD).]                                                                                                                      | ER            |
| <b>Q9UHB9</b> | Signal recognition particle 68 kDa protein (SRP68).                                                                                                                                                                                                                                                                 | ER            |
| <b>P57727</b> | [Transmembrane protease, serine 3 (EC 3.4.21.-) (Serine protease TADG-, 12) (Tumor-associated differentially-expressed gene 12 protein).]                                                                                                                                                                           | ER            |
| <b>P36222</b> | [Chitinase-3-like protein 1 precursor (Cartilage glycoprotein 39) (GP-, 39) (39 kDa synovial protein) (HCgp-39) (YKL-40).]                                                                                                                                                                                          | Extracellular |
| <b>PO1133</b> | [Pro-epidermal growth factor precursor (EGF) [Contains: Epidermal, growth factor (Urogastrone)].]                                                                                                                                                                                                                   | Extracellular |
| <b>P36222</b> | [Chitinase-3-like protein 1 precursor (Cartilage glycoprotein 39) (GP-, 39) (39 kDa synovial protein) (HCgp-39) (YKL-40).]                                                                                                                                                                                          | Extracellular |
| <b>P19652</b> | Alpha-1-acid glycoprotein 2 precursor (AGP 2) (Orosomucoid-2) (OMD 2).                                                                                                                                                                                                                                              | Extracellular |
| <b>PO4217</b> | Alpha-1B-glycoprotein precursor (Alpha-1-B glycoprotein).                                                                                                                                                                                                                                                           | Extracellular |
| <b>PO8697</b> | [Alpha-2-antiplasmin precursor (Alpha-2-plasmin inhibitor) (Alpha-2-PI), (Alpha-2-AP).]                                                                                                                                                                                                                             | Extracellular |
| <b>PO2765</b> | [Alpha-2-HS-glycoprotein precursor (Fetuin-A) (Alpha-2-Z-globulin) (Ba-, alpha-2-glycoprotein) [Contains: Alpha-2-HS-glycoprotein chain A;, Alpha-2-HS-glycoprotein chain B].]                                                                                                                                      | Extracellular |
| <b>P35858</b> | [Insulin-like growth factor-binding protein complex acid labile chain, precursor (ALS).]                                                                                                                                                                                                                            | Extracellular |

|               |                                                                                                                                                                                                                                               |               |
|---------------|-----------------------------------------------------------------------------------------------------------------------------------------------------------------------------------------------------------------------------------------------|---------------|
| <b>P02760</b> | [AMBP protein precursor [Contains: Alpha-1-microglobulin (Protein HC), (Complex-forming glycoprotein heterogeneous in charge) (Alpha-1, microglycoprotein); Inter-alpha-trypsin inhibitor light chain (ITI-LC), (Bikunin) (HI-30)].]          | Extracellular |
| <b>P16860</b> | [Natriuretic peptides B precursor [Contains: Gamma-brain natriuretic, peptide; Brain natriuretic peptide 32 (BNP-32)].]                                                                                                                       | Extracellular |
| <b>P06727</b> | Apolipoprotein A-IV precursor (Apo-AIV) (ApoA-IV).                                                                                                                                                                                            | Extracellular |
| <b>P02656</b> | Apolipoprotein C-III precursor (Apo-CIII) (ApoC-III).                                                                                                                                                                                         | Extracellular |
| <b>O75882</b> | Attractin precursor (Mahogany homolog) (DPPT-L).                                                                                                                                                                                              | Extracellular |
| <b>Q15582</b> | [Transforming growth factor-beta-induced protein ig-h3 precursor (Beta, ig-h3) (Kerato-epithelin) (RGD-containing collagen-associated protein), (RGD-CAP).]                                                                                   | Extracellular |
| <b>P04003</b> | [C4b-binding protein alpha chain precursor (C4bp) (Proline-rich, protein) (PRP).]                                                                                                                                                             | Extracellular |
| <b>P07711</b> | [Cathepsin L precursor (EC 3.4.22.15) (Major excreted protein) (MEP), [Contains: Cathepsin L heavy chain; Cathepsin L light chain].]                                                                                                          | Extracellular |
| <b>P00450</b> | Ceruloplasmin precursor (EC 1.16.3.1) (Ferroxidase).                                                                                                                                                                                          | Extracellular |
| <b>P08603</b> | Complement factor H precursor (H factor 1).                                                                                                                                                                                                   | Extracellular |
| <b>Q9UBP4</b> | Dickkopf-related protein 3 precursor (Dkk-3) (Dickkopf-3) (hDkk-3).                                                                                                                                                                           | Extracellular |
| <b>Q16610</b> | Extracellular matrix protein 1 precursor (Secretory component p85).                                                                                                                                                                           | Extracellular |
| <b>P13727</b> | [Bone-marrow proteoglycan precursor (BMPG) (Proteoglycan 2) [Contains: Eosinophil granule major basic protein (EMBP) (MBP) (Pregnancy-, associated major basic protein)].]                                                                    | Extracellular |
| <b>P00488</b> | [Coagulation factor XIII A chain precursor (EC 2.3.2.13) (Coagulation, factor XIIIa) (Protein-glutamine gamma-glutamyltransferase A chain), (Transglutaminase A chain).]                                                                      | Extracellular |
| <b>P00748</b> | [Coagulation factor XII precursor (EC 3.4.21.38) (Hageman factor) (HAF), [Contains: Coagulation factor XIIa heavy chain; Beta-factor XIIa part, 1; Beta-factor XIIa part 2; Coagulation factor XIIa light chain].]                            | Extracellular |
| <b>P00451</b> | [Coagulation factor VIII precursor (Procoagulant component), (Antihemophilic factor) (AHF) [Contains: Factor VIIIa heavy chain, 200, kDa isoform; Factor VIIIa heavy chain, 92 kDa isoform; Factor VIII B, chain; Factor VIIIa light chain].] | Extracellular |
| <b>Q12805</b> | [EGF-containing fibulin-like extracellular matrix protein 1 precursor, (Fibulin-3) (FIBL-3) (Fibrillin-like protein) (Extracellular protein, S1-5).]                                                                                          | Extracellular |
| <b>P35556</b> | Fibrillin-2 precursor.                                                                                                                                                                                                                        | Extracellular |
| <b>Q9GZV9</b> | [Fibroblast growth factor 23 precursor (FGF-23) (Tumor-derived, hypophosphatemia-inducing factor).]                                                                                                                                           | Extracellular |
| <b>P13284</b> | [Gamma-interferon-inducible lysosomal thiol reductase precursor (Gamma-, interferon-inducible protein IP-30).]                                                                                                                                | Extracellular |
| <b>P05546</b> | [Heparin cofactor 2 precursor (Heparin cofactor II) (HC-II) (Protease, inhibitor leuserpin 2) (HLS2).]                                                                                                                                        | Extracellular |
| <b>P06326</b> | Ig heavy chain V-I region Mot.                                                                                                                                                                                                                | Extracellular |
| <b>P01772</b> | Ig heavy chain V-III region KOL.                                                                                                                                                                                                              | Extracellular |
| <b>P01780</b> | Ig heavy chain V-III region JON.                                                                                                                                                                                                              | Extracellular |
| <b>P05155</b> | [Plasma protease C1 inhibitor precursor (C1 Inh) (C1Inh) (C1 esterase, inhibitor) (C1-inhibiting factor).]                                                                                                                                    | Extracellular |
| <b>P09529</b> | Inhibin beta B chain precursor (Activin beta-B chain).                                                                                                                                                                                        | Extracellular |
| <b>P19823</b> | [Inter-alpha-trypsin inhibitor heavy chain H2 precursor (ITI heavy, chain H2) (Inter-alpha-inhibitor heavy chain 2) (Inter-alpha-trypsin, inhibitor complex component II) (Serum-derived hyaluronan-associated, protein) (SHAP).]             | Extracellular |
| <b>P23352</b> | [Anosmin-1 precursor (Kallmann syndrome protein) (Adhesion molecule-, like X-linked).]                                                                                                                                                        | Extracellular |
| <b>Q9UKQ9</b> | [Kallikrein-9 precursor (EC 3.4.21.-) (Kallikrein-like protein 3) (KLK-, L3).]                                                                                                                                                                | Extracellular |
| <b>P01607</b> | Ig kappa chain V-I region Rei.                                                                                                                                                                                                                | Extracellular |
| <b>P04431</b> | Ig kappa chain V-I region Walker precursor.                                                                                                                                                                                                   | Extracellular |

|               |                                                                                                                                                                                                                                                                                                                                                                                                                        |               |
|---------------|------------------------------------------------------------------------------------------------------------------------------------------------------------------------------------------------------------------------------------------------------------------------------------------------------------------------------------------------------------------------------------------------------------------------|---------------|
| <b>P06310</b> | Ig kappa chain V-II region RPMI 6410 precursor.                                                                                                                                                                                                                                                                                                                                                                        | Extracellular |
| <b>P18136</b> | Ig kappa chain V-III region HIC precursor.                                                                                                                                                                                                                                                                                                                                                                             | Extracellular |
| <b>P04180</b> | [Phosphatidylcholine-sterol acyltransferase precursor (EC 2.3.1.43), (Lecithin-cholesterol acyltransferase) (Phospholipid-cholesterol, acyltransferase).]                                                                                                                                                                                                                                                              | Extracellular |
| <b>P06888</b> | Ig lambda chain V-I region EPS.                                                                                                                                                                                                                                                                                                                                                                                        | Extracellular |
| <b>P80748</b> | Ig lambda chain V-III region LOI.                                                                                                                                                                                                                                                                                                                                                                                      | Extracellular |
| <b>Q16820</b> | [Meprin A subunit beta precursor (EC 3.4.24.18) (Endopeptidase-2) (N-, benzoyl-L-tyrosyl-P-amino-benzoic acid hydrolase subunit beta) (PABA, peptide hydrolase) (PPH beta).]                                                                                                                                                                                                                                           | Extracellular |
| <b>P08253</b> | [72 kDa type IV collagenase precursor (EC 3.4.24.24) (72 kDa, gelatinase) (Matrix metalloproteinase-2) (MMP-2) (Gelatinase A) (TBE-, 1).]                                                                                                                                                                                                                                                                              | Extracellular |
| <b>P09238</b> | [Stromelysin-2 precursor (EC 3.4.24.22) (Matrix metalloproteinase-10), (MMP-10) (Transin-2) (SL-2).]                                                                                                                                                                                                                                                                                                                   | Extracellular |
| <b>O95460</b> | Matrilin-4 precursor.                                                                                                                                                                                                                                                                                                                                                                                                  | Extracellular |
| <b>Q02505</b> | Mucin-3A precursor (Intestinal mucin-3A).                                                                                                                                                                                                                                                                                                                                                                              | Extracellular |
| <b>P36955</b> | [Pigment epithelium-derived factor precursor (PEDF) (Serpin-F1) (EPC-, 1).]                                                                                                                                                                                                                                                                                                                                            | Extracellular |
| <b>P41222</b> | [Prostaglandin-H2 D-isomerase precursor (EC 5.3.99.2) (Lipocalin-type, prostaglandin-D synthase) (Glutathione-independent PGD synthetase), (Prostaglandin-D2 synthase) (PGD2 synthase) (PGDS2) (PGDS) (Beta-trace, protein) (Cerebrin-28).]                                                                                                                                                                            | Extracellular |
| <b>P55058</b> | Phospholipid transfer protein precursor (Lipid transfer protein II).                                                                                                                                                                                                                                                                                                                                                   | Extracellular |
| <b>P35542</b> | [Serum amyloid A-4 protein precursor (Constitutively expressed serum, amyloid A protein) (C-SAA).]                                                                                                                                                                                                                                                                                                                     | Extracellular |
| <b>P02743</b> | [Serum amyloid P-component precursor (SAP) (9.5S alpha-1-glycoprotein), [Contains: Serum amyloid P-component(1-203).]                                                                                                                                                                                                                                                                                                  | Extracellular |
| <b>P13521</b> | [Secretogranin-2 precursor (Secretogranin II) (SgII) (Chromogranin-C), [Contains: Secretoneurin (SN)].]                                                                                                                                                                                                                                                                                                                | Extracellular |
| <b>Q13275</b> | Semaphorin-3F precursor (Semaphorin IV) (Sema IV) (Sema III/F).                                                                                                                                                                                                                                                                                                                                                        | Extracellular |
| <b>O00626</b> | [Small-inducible cytokine A22 precursor (CCL22) (Macrophage-derived, chemokine) (MDC(1-69)) (Stimulated T-cell chemotactic protein 1) (CC, chemokine STCP-1) [Contains: MDC(3-69); MDC(5-69); MDC(7-69)].]                                                                                                                                                                                                             | Extracellular |
| <b>P13693</b> | [Translationally-controlled tumor protein (TCTP) (p23) (Histamine-, releasing factor) (HRF) (Fortilin).]                                                                                                                                                                                                                                                                                                               | Extracellular |
| <b>P00734</b> | [Prothrombin precursor (EC 3.4.21.5) (Coagulation factor II) [Contains: Activation peptide fragment 1; Activation peptide fragment 2; Thrombin, light chain; Thrombin heavy chain].]                                                                                                                                                                                                                                   | Extracellular |
| <b>P01033</b> | [Metalloproteinase inhibitor 1 precursor (TIMP-1) (Erythroid-, potentiating activity) (EPA) (Tissue inhibitor of metalloproteinases), (Fibroblast collagenase inhibitor) (Collagenase inhibitor).]                                                                                                                                                                                                                     | Extracellular |
| <b>O14788</b> | [Tumor necrosis factor ligand superfamily member 11 (Receptor activator, of nuclear factor kappa B ligand) (RANKL) (TNF-related activation-, induced cytokine) (TRANCE) (Osteoprotegerin ligand) (OPGL) (Osteoclast, differentiation factor) (ODF) (CD254 antigen) [Contains: Tumor, necrosis factor ligand superfamily member 11, membrane form; Tumor, necrosis factor ligand superfamily member 11, soluble form].] | Extracellular |
| <b>P07996</b> | Thrombospondin-1 precursor.                                                                                                                                                                                                                                                                                                                                                                                            | Extracellular |
| <b>P02766</b> | Transthyretin precursor (Prealbumin) (TBPA) (TTR) (ATTR).                                                                                                                                                                                                                                                                                                                                                              | Extracellular |
| <b>P17948</b> | [Vascular endothelial growth factor receptor 1 precursor (EC 2.7.10.1), (VEGFR-1) (Vascular permeability factor receptor) (Tyrosine-protein, kinase receptor FLT) (Flt-1) (Tyrosine-protein kinase FRT) (Fms-like, tyrosine kinase 1).]                                                                                                                                                                                | Extracellular |
| <b>P01009</b> | [Alpha-1-antitrypsin precursor (Alpha-1 protease inhibitor) (Alpha-1-, antiproteinase).]                                                                                                                                                                                                                                                                                                                               | Extracellular |
| <b>P01019</b> | [Angiotensinogen precursor (SerpA8) [Contains: Angiotensin-1, (Angiotensin I) (Ang I); Angiotensin-2 (Angiotensin II) (Ang II);, Angiotensin-3 (Angiotensin III) (Ang III) (Des-Asp[1]-angiotensin, II)].]                                                                                                                                                                                                             | Extracellular |
| <b>P02647</b> | [Apolipoprotein A-I precursor (Apo-AI) (ApoA-I) [Contains: Apolipoprotein A-I(1-242)].]                                                                                                                                                                                                                                                                                                                                | Extracellular |

|               |                                                                                                                                                                                                                                                                                                                                                                                 |               |
|---------------|---------------------------------------------------------------------------------------------------------------------------------------------------------------------------------------------------------------------------------------------------------------------------------------------------------------------------------------------------------------------------------|---------------|
| <b>P02749</b> | [Beta-2-glycoprotein 1 precursor (Beta-2-glycoprotein I), (Apolipoprotein H) (Apo-H) (B2GPI) (Beta(2)GPI) (Activated protein C-, binding protein) (APC inhibitor) (Anticardiolipin cofactor).]                                                                                                                                                                                  | Extracellular |
| <b>O15072</b> | [ADAMTS-3 precursor (EC 3.4.24.-) (A disintegrin and metalloproteinase, with thrombospondin motifs 3) (ADAM-TS 3) (ADAM-TS3) (Procollagen II, amino propeptide-processing enzyme) (Procollagen II N-proteinase) (PC, II-NP).]                                                                                                                                                   | Extracellular |
| <b>P36222</b> | [Chitinase-3-like protein 1 precursor (Cartilage glycoprotein 39) (GP-, 39) (39 kDa synovial protein) (HCgp-39) (YKL-40).]                                                                                                                                                                                                                                                      | Extracellular |
| <b>PO7339</b> | [Cathepsin D precursor (EC 3.4.23.5) [Contains: Cathepsin D light, chain; Cathepsin D heavy chain].]                                                                                                                                                                                                                                                                            | Extracellular |
| <b>P22792</b> | [Carboxypeptidase N subunit 2 precursor (Carboxypeptidase N polypeptide, 2) (Carboxypeptidase N 83 kDa chain) (Carboxypeptidase N regulatory, subunit) (Carboxypeptidase N large subunit).]                                                                                                                                                                                     | Extracellular |
| <b>P15169</b> | [Carboxypeptidase N catalytic chain precursor (EC 3.4.17.3) (CPN), (Carboxypeptidase N polypeptide 1) (Carboxypeptidase N small subunit), (Lysine carboxypeptidase) (Arginine carboxypeptidase) (Kininase-1), (Serum carboxypeptidase N) (SCPN) (Anaphylatoxin inactivator) (Plasma, carboxypeptidase B).]                                                                      | Extracellular |
| <b>PO6276</b> | [Cholinesterase precursor (EC 3.1.1.8) (Acylcholine acylhydrolase), (Choline esterase II) (Butyrylcholine esterase), (Pseudocholinesterase).]                                                                                                                                                                                                                                   | Extracellular |
| <b>P10909</b> | [Clusterin precursor (Complement-associated protein SP-40,40), (Complement cytotoxicity inhibitor) (CLI) (NA1/NA2) (Apolipoprotein J), (Apo-J) (Testosterone-repressed prostate message 2) (TRPM-2), [Contains: Clusterin beta chain (ApoJalpha) (Complement cytotoxicity, inhibitor a chain); Clusterin alpha chain (ApoJbeta) (Complement, cytotoxicity inhibitor b chain)].] | Extracellular |
| <b>PO1031</b> | [Complement C5 precursor [Contains: Complement C5 beta chain;, Complement C5 alpha chain; C5a anaphylatoxin; Complement C5 alpha', chain].]                                                                                                                                                                                                                                     | Extracellular |
| <b>PO7357</b> | [Complement component C8 alpha chain precursor (Complement component 8, subunit alpha).]                                                                                                                                                                                                                                                                                        | Extracellular |
| <b>P15502</b> | Elastin precursor (Tropoelastin).                                                                                                                                                                                                                                                                                                                                               | Extracellular |
| <b>PO5305</b> | [Endothelin-1 precursor (Preproendothelin-1) (PPET1) [Contains:, Endothelin-1 (ET-1); Big endothelin-1].]                                                                                                                                                                                                                                                                       | Extracellular |
| <b>PO5160</b> | [Coagulation factor XIII B chain precursor (Protein-glutamine gamma-, glutamyltransferase B chain) (Transglutaminase B chain) (Fibrin-, stabilizing factor B subunit).]                                                                                                                                                                                                         | Extracellular |
| <b>P23142</b> | Fibulin-1 precursor.                                                                                                                                                                                                                                                                                                                                                            | Extracellular |
| <b>Q9UBX5</b> | [Fibulin-5 precursor (FIBL-5) (Developmental arteries and neural crest, EGF-like protein) (Dance) (Urine p50 protein) (UP50).]                                                                                                                                                                                                                                                  | Extracellular |
| <b>PO8620</b> | [Fibroblast growth factor 4 precursor (FGF-4) (Heparin secretory-, transforming protein) (HST-1) (HST) (Transforming protein KS3) (HBGF-, 4).]                                                                                                                                                                                                                                  | Extracellular |
| <b>Q02985</b> | [Complement factor H-related protein 3 precursor (FHR-3) (H factor-like, protein 3) (DOWN16).]                                                                                                                                                                                                                                                                                  | Extracellular |
| <b>Q06136</b> | [3-ketodihydrosphingosine reductase precursor (EC 1.1.1.102) (3-, dehydrosphinganine reductase) (KDS reductase) (Follicular variant, translocation protein 1) (FVT-1).]                                                                                                                                                                                                         | Extracellular |
| <b>PO1824</b> | Ig heavy chain V-II region WAH.                                                                                                                                                                                                                                                                                                                                                 | Extracellular |
| <b>PO1777</b> | Ig heavy chain V-III region TEI.                                                                                                                                                                                                                                                                                                                                                | Extracellular |
| <b>PO1782</b> | Ig heavy chain V-III region DOB.                                                                                                                                                                                                                                                                                                                                                | Extracellular |
| <b>Q06033</b> | [Inter-alpha-trypsin inhibitor heavy chain H3 precursor (ITI heavy, chain H3) (Inter-alpha-inhibitor heavy chain 3) (Serum-derived, hyaluronan-associated protein) (SHAP).]                                                                                                                                                                                                     | Extracellular |
| <b>O43240</b> | [Kallikrein-10 precursor (EC 3.4.21.-) (Protease serine-like 1) (Normal, epithelial cell-specific 1).]                                                                                                                                                                                                                                                                          | Extracellular |
| <b>PO1042</b> | [Kininogen-1 precursor (Alpha-2-thiol proteinase inhibitor) [Contains:, Kininogen-1 heavy chain; Bradykinin (Kallidin I); Lysyl-bradykinin, (Kallidin II); Kininogen-1 light chain; Low molecular weight growth-, promoting factor].]                                                                                                                                           | Extracellular |
| <b>PO1594</b> | Ig kappa chain V-I region AU.                                                                                                                                                                                                                                                                                                                                                   | Extracellular |
| <b>PO1612</b> | Ig kappa chain V-I region Mev.                                                                                                                                                                                                                                                                                                                                                  | Extracellular |

|               |                                                                                                                                                                                                                                                                                                                                                                                                |               |
|---------------|------------------------------------------------------------------------------------------------------------------------------------------------------------------------------------------------------------------------------------------------------------------------------------------------------------------------------------------------------------------------------------------------|---------------|
| <b>P80362</b> | Ig kappa chain V-I region WAT.                                                                                                                                                                                                                                                                                                                                                                 | Extracellular |
| <b>P04207</b> | Ig kappa chain V-III region CLL precursor (Rheumatoid factor).                                                                                                                                                                                                                                                                                                                                 | Extracellular |
| <b>P01625</b> | Ig kappa chain V-IV region Len.                                                                                                                                                                                                                                                                                                                                                                | Extracellular |
| <b>P54317</b> | Pancreatic lipase-related protein 2 precursor (EC 3.1.1.3).                                                                                                                                                                                                                                                                                                                                    | Extracellular |
| <b>Q9Y4K0</b> | [Lysyl oxidase homolog 2 precursor (EC 1.4.3.-) (Lysyl oxidase-like, protein 2) (Lysyl oxidase-related protein 2) (Lysyl oxidase-related, protein WS9-14).]                                                                                                                                                                                                                                    | Extracellular |
| <b>P01705</b> | Ig lambda chain V-II region NEI.                                                                                                                                                                                                                                                                                                                                                               | Extracellular |
| <b>P06318</b> | Ig lambda chain V-VI region WLT.                                                                                                                                                                                                                                                                                                                                                               | Extracellular |
| <b>P19875</b> | [Macrophage inflammatory protein 2-alpha precursor (MIP2-alpha) (CXCL2), (Growth-regulated protein beta) (Gro-beta) [Contains: GRO-beta(5-73), (GRO-beta-T) (SB-251353) (Hematopoietic synergistic factor) (HSF)].]                                                                                                                                                                            | Extracellular |
| <b>P08254</b> | [Stromelysin-1 precursor (EC 3.4.24.17) (Matrix metalloproteinase-3), (MMP-3) (Transin-1) (SL-1).]                                                                                                                                                                                                                                                                                             | Extracellular |
| <b>Q99435</b> | [Protein kinase C-binding protein NELL2 precursor (NEL-like protein 2), (Nel-related protein 2).]                                                                                                                                                                                                                                                                                              | Extracellular |
| <b>P10451</b> | [Osteopontin precursor (Bone sialoprotein 1) (Secreted phosphoprotein, 1) (SPP-1) (Urinary stone protein) (Nephropontin) (Uropontin).]                                                                                                                                                                                                                                                         | Extracellular |
| <b>P13611</b> | [Versican core protein precursor (Large fibroblast proteoglycan), (Chondroitin sulfate proteoglycan core protein 2) (PG-M) (Glial, hyaluronate-binding protein) (GHAP).]                                                                                                                                                                                                                       | Extracellular |
| <b>P02776</b> | Platelet factor 4 precursor (PF-4) (CXCL4) (Oncostatin A) (Iroplact).                                                                                                                                                                                                                                                                                                                          | Extracellular |
| <b>P00747</b> | [Plasminogen precursor (EC 3.4.21.7) [Contains: Plasmin heavy chain A,; Activation peptide; Angiostatin; Plasmin heavy chain A, short form,; Plasmin light chain B].]                                                                                                                                                                                                                          | Extracellular |
| <b>P27169</b> | [Serum paraoxonase/arylesterase 1 (EC 3.1.1.2) (EC 3.1.8.1) (PON 1), (Serum aryldialkylphosphatase 1) (A-esterase 1) (Aromatic esterase 1), (K-45).]                                                                                                                                                                                                                                           | Extracellular |
| <b>P07225</b> | Vitamin K-dependent protein S precursor.                                                                                                                                                                                                                                                                                                                                                       | Extracellular |
| <b>P02753</b> | [Plasma retinol-binding protein precursor (PRBP) (RBP) [Contains: Plasma retinol-binding protein(1-182); Plasma retinol-binding, protein(1-181); Plasma retinol-binding protein(1-179); Plasma retinol-, binding protein(1-176)].]                                                                                                                                                             | Extracellular |
| <b>P07602</b> | [Proactivator polypeptide precursor [Contains: Saposin-A (Protein A),; Saposin-B-Val; Saposin-B (Sphingolipid activator protein 1) (SAP-1), (Cerebroside sulfate activator) (CSAct) (Dispersin) (Sulfatide/GM1, activator); Saposin-C (Co-beta-glucosidase) (A1 activator), (Glucosylceramidase activator) (Sphingolipid activator protein 2), (SAP-2); Saposin-D (Protein C) (Component C)].] | Extracellular |
| <b>P49908</b> | Selenoprotein P precursor (SeP).                                                                                                                                                                                                                                                                                                                                                               | Extracellular |
| <b>P09486</b> | [SPARC precursor (Secreted protein acidic and rich in cysteine), (Osteonectin) (ON) (Basement-membrane protein 40) (BM-40).]                                                                                                                                                                                                                                                                   | Extracellular |
| <b>O43278</b> | [Kunitz-type protease inhibitor 1 precursor (Hepatocyte growth factor, activator inhibitor type 1) (HAI-1).]                                                                                                                                                                                                                                                                                   | Extracellular |
| <b>P01266</b> | Thyroglobulin precursor.                                                                                                                                                                                                                                                                                                                                                                       | Extracellular |
| <b>P35443</b> | Thrombospondin-4 precursor.                                                                                                                                                                                                                                                                                                                                                                    | Extracellular |
| <b>P02774</b> | [Vitamin D-binding protein precursor (DBP) (Group-specific component), (Gc-globulin) (VDB).]                                                                                                                                                                                                                                                                                                   | Extracellular |
| <b>Q93097</b> | Protein Wnt-2b precursor (Wnt-13).                                                                                                                                                                                                                                                                                                                                                             | Extracellular |
| <b>P25311</b> | [Zinc-alpha-2-glycoprotein precursor (Zn-alpha-2-glycoprotein) (Zn-, alpha-2-GP).]                                                                                                                                                                                                                                                                                                             | Extracellular |
| <b>P02763</b> | Alpha-1-acid glycoprotein 1 precursor (AGP 1) (Orosomucoid-1) (OMD 1).                                                                                                                                                                                                                                                                                                                         | Extracellular |
| <b>P02750</b> | Leucine-rich alpha-2-glycoprotein precursor (LRG).                                                                                                                                                                                                                                                                                                                                             | Extracellular |
| <b>P01023</b> | Alpha-2-macroglobulin precursor (Alpha-2-M).                                                                                                                                                                                                                                                                                                                                                   | Extracellular |



|               |                                                                                                                                                                                                 |               |
|---------------|-------------------------------------------------------------------------------------------------------------------------------------------------------------------------------------------------|---------------|
| <b>P01011</b> | [Alpha-1-antichymotrypsin precursor (ACT) (Cell growth-inhibiting gene, 24/25 protein) [Contains: Alpha-1-antichymotrypsin His-Pro-less].]                                                      | Extracellular |
| <b>P43652</b> | Afamin precursor (Alpha-albumin) (Alpha-Alb).                                                                                                                                                   | Extracellular |
| <b>P02768</b> | Serum albumin precursor.                                                                                                                                                                        | Extracellular |
| <b>P01008</b> | Antithrombin-III precursor (ATIII).                                                                                                                                                             | Extracellular |
| <b>P02652</b> | [Apolipoprotein A-II precursor (ApoA-II) (ApoA-II) [Contains:, Apolipoprotein A-II(1-76)].]                                                                                                     | Extracellular |
| <b>P02655</b> | Apolipoprotein C-II precursor (ApoC-II) (ApoC-II).                                                                                                                                              | Extracellular |
| <b>P00736</b> | [Complement C1r subcomponent precursor (EC 3.4.21.41) (Complement, component 1, r subcomponent) [Contains: Complement C1r subcomponent, heavy chain; Complement C1r subcomponent light chain].] | Extracellular |
| <b>Q15782</b> | [Chitinase-3-like protein 2 precursor (YKL-39) (Chondrocyte protein, 39).]                                                                                                                      | Extracellular |
| <b>P02462</b> | Collagen alpha-1(IV) chain precursor (Arresten).                                                                                                                                                | Extracellular |
| <b>P12110</b> | Collagen alpha-2(VI) chain precursor.                                                                                                                                                           | Extracellular |
| <b>P06681</b> | [Complement C2 precursor (EC 3.4.21.43) (C3/C5 convertase) [Contains:, Complement C2b fragment; Complement C2a fragment].]                                                                      | Extracellular |
| <b>P49747</b> | Cartilage oligomeric matrix protein precursor (COMP).                                                                                                                                           | Extracellular |
| <b>P54108</b> | Cysteine-rich secretory protein 3 precursor (CRISP-3) (SGP28 protein).                                                                                                                          | Extracellular |
| <b>O00548</b> | [Delta-like protein 1 precursor (Drosophila Delta homolog 1) (Delta1), (H-Delta-1).]                                                                                                            | Extracellular |
| <b>P08218</b> | Elastase-2B precursor (EC 3.4.21.71).                                                                                                                                                           | Extracellular |
| <b>P12259</b> | [Coagulation factor V precursor (Activated protein C cofactor), [Contains: Coagulation factor V heavy chain; Coagulation factor V, light chain].]                                               | Extracellular |
| <b>P98095</b> | Fibulin-2 precursor.                                                                                                                                                                            | Extracellular |
| <b>O75072</b> | [Fukutin (EC 2.-.-.-) (Fukuyama-type congenital muscular dystrophy, protein).]                                                                                                                  | Extracellular |
| <b>Q9UGM5</b> | Fetuin-B precursor (Gugu) (IRL685) (16G2).                                                                                                                                                      | Extracellular |
| <b>Q03591</b> | [Complement factor H-related protein 1 precursor (FHR-1) (H factor-like, protein 1) (H-factor-like 1) (H36).]                                                                                   | Extracellular |
| <b>Q12841</b> | Follistatin-related protein 1 precursor (Follistatin-like 1).                                                                                                                                   | Extracellular |
| <b>P36222</b> | [Chitinase-3-like protein 1 precursor (Cartilage glycoprotein 39) (GP-, 39) (39 kDa synovial protein) (HCgp-39) (YKL-40).]                                                                      | Extracellular |
| <b>P22352</b> | [Glutathione peroxidase 3 precursor (EC 1.11.1.9) (GSHPx-3) (GPx-3), (Plasma glutathione peroxidase) (GSHPx-P) (Extracellular glutathione, peroxidase) (GPx-P).]                                | Extracellular |
| <b>P02790</b> | Hemopexin precursor (Beta-1B-glycoprotein).                                                                                                                                                     | Extracellular |
| <b>P00738</b> | [Haptoglobin precursor [Contains: Haptoglobin alpha chain; Haptoglobin, beta chain].]                                                                                                           | Extracellular |
| <b>P04196</b> | [Histidine-rich glycoprotein precursor (Histidine-proline-rich, glycoprotein) (HPRG).]                                                                                                          | Extracellular |
| <b>P01767</b> | Ig heavy chain V-III region BUT.                                                                                                                                                                | Extracellular |
| <b>P01779</b> | Ig heavy chain V-III region TUR.                                                                                                                                                                | Extracellular |
| <b>P80419</b> | Ig heavy chain V-III region GAR.                                                                                                                                                                | Extracellular |
| <b>Q14627</b> | [Interleukin-13 receptor alpha-2 chain precursor (Interleukin-13-, binding protein) (CD213a2 antigen).]                                                                                         | Extracellular |
| <b>P14735</b> | [Insulin-degrading enzyme (EC 3.4.24.56) (Insulysin) (Insulinase), (Insulin protease).]                                                                                                         | Extracellular |
| <b>Q14116</b> | [Interleukin-18 precursor (IL-18) (Interferon-gamma-inducing factor), (IFN-gamma-inducing factor) (Interleukin-1 gamma) (IL-1 gamma), (Iboctadekin).]                                           | Extracellular |
| <b>P08887</b> | [Interleukin-6 receptor alpha chain precursor (IL-6R-alpha) (IL-6R 1), (Membrane glycoprotein 80) (gp80) (CD126 antigen).]                                                                      | Extracellular |

|               |                                                                                                                                                                                                                                                                                                                                                                                           |               |
|---------------|-------------------------------------------------------------------------------------------------------------------------------------------------------------------------------------------------------------------------------------------------------------------------------------------------------------------------------------------------------------------------------------------|---------------|
| <b>P19827</b> | [Inter-alpha-trypsin inhibitor heavy chain H1 precursor (ITI heavy, chain H1) (Inter-alpha-inhibitor heavy chain 1) (Inter-alpha-trypsin, inhibitor complex component III) (Serum-derived hyaluronan-associated, protein) (SHAP).]                                                                                                                                                        | Extracellular |
| <b>Q14624</b> | [Inter-alpha-trypsin inhibitor heavy chain H4 precursor (ITI heavy, chain H4) (Inter-alpha-inhibitor heavy chain 4) (Inter-alpha-trypsin, inhibitor family heavy chain-related protein) (IHRP) (Plasma, kallikrein sensitive glycoprotein 120) (PK-120) (GP120) [Contains: 70, kDa inter-alpha-trypsin inhibitor heavy chain H4; 35 kDa inter-alpha-, trypsin inhibitor heavy chain H4].] | Extracellular |
| <b>P03952</b> | [Plasma kallikrein precursor (EC 3.4.21.34) (Plasma prekallikrein), (Kininogenin) (Fletcher factor) [Contains: Plasma kallikrein heavy, chain; Plasma kallikrein light chain].]                                                                                                                                                                                                           | Extracellular |
| <b>Q9POG3</b> | [Kallikrein-14 precursor (EC 3.4.21.-) (Kallikrein-like protein 6), (KLK-L6).]                                                                                                                                                                                                                                                                                                            | Extracellular |
| <b>P01606</b> | Ig kappa chain V-I region OU.                                                                                                                                                                                                                                                                                                                                                             | Extracellular |
| <b>P01613</b> | Ig kappa chain V-I region Ni.                                                                                                                                                                                                                                                                                                                                                             | Extracellular |
| <b>P06309</b> | Ig kappa chain V-II region GM607 precursor (Fragment).                                                                                                                                                                                                                                                                                                                                    | Extracellular |
| <b>P04433</b> | Ig kappa chain V-III region VG precursor (Fragment).                                                                                                                                                                                                                                                                                                                                      | Extracellular |
| <b>P18428</b> | Lipopolysaccharide-binding protein precursor (LBP).                                                                                                                                                                                                                                                                                                                                       | Extracellular |
| <b>P58215</b> | [Lysyl oxidase homolog 3 precursor (EC 1.4.3.-) (Lysyl oxidase-like, protein 3).]                                                                                                                                                                                                                                                                                                         | Extracellular |
| <b>P01700</b> | Ig lambda chain V-I region HA.                                                                                                                                                                                                                                                                                                                                                            | Extracellular |
| <b>P01706</b> | Ig lambda chain V-II region BOH.                                                                                                                                                                                                                                                                                                                                                          | Extracellular |
| <b>Q16819</b> | [Meprin A subunit alpha precursor (EC 3.4.24.18) (Endopeptidase-2) (N-, benzoyl-L-tyrosyl-P-amino-benzoic acid hydrolase subunit alpha) (PABA, peptide hydrolase) (PPH alpha).]                                                                                                                                                                                                           | Extracellular |
| <b>P14780</b> | [Matrix metalloproteinase-9 precursor (EC 3.4.24.35) (MMP-9) (92 kDa, type IV collagenase) (92 kDa gelatinase) (Gelatinase B) (GELB), [Contains: 67 kDa matrix metalloproteinase-9; 82 kDa matrix, metalloproteinase-9].]                                                                                                                                                                 | Extracellular |
| <b>Q9H239</b> | [Matrix metalloproteinase-28 precursor (EC 3.4.24.-) (MMP-28), (Epilysin).]                                                                                                                                                                                                                                                                                                               | Extracellular |
| <b>O00339</b> | Matrilin-2 precursor.                                                                                                                                                                                                                                                                                                                                                                     | Extracellular |
| <b>P16519</b> | [Neuroendocrine convertase 2 precursor (EC 3.4.21.94) (NEC 2) (PC2), (Prohormone convertase 2) (Proprotein convertase 2) (KEX2-like, endoprotease 2).]                                                                                                                                                                                                                                    | Extracellular |
| <b>P56975</b> | [Pro-neuregulin-3, membrane-bound isoform precursor (Pro-NRG3), [Contains: Neuregulin-3 (NRG-3)].]                                                                                                                                                                                                                                                                                        | Extracellular |
| <b>P10915</b> | [Hyaluronan and proteoglycan link protein 1 precursor (Proteoglycan, link protein) (Cartilage link protein) (LP).]                                                                                                                                                                                                                                                                        | Extracellular |
| <b>P20742</b> | Pregnancy zone protein precursor.                                                                                                                                                                                                                                                                                                                                                         | Extracellular |
| <b>Q13123</b> | Protein Red (Protein RER) (IK factor) (Cytokine IK).                                                                                                                                                                                                                                                                                                                                      | Extracellular |
| <b>Q02383</b> | Semenogelin-2 precursor (Semenogelin II) (SGII).                                                                                                                                                                                                                                                                                                                                          | Extracellular |
| <b>Q14563</b> | Semaphorin-3A precursor (Semaphorin III) (Sema III).                                                                                                                                                                                                                                                                                                                                      | Extracellular |
| <b>P78556</b> | [Small-inducible cytokine A20 precursor (CCL20) (Macrophage, inflammatory protein 3 alpha) (MIP-3-alpha) (Liver and activation-, regulated chemokine) (CC chemokine LARC) (Beta chemokine exodus-1), [Contains: CCL20(1-67); CCL20(1-64); CCL20(2-70)].]                                                                                                                                  | Extracellular |
| <b>P05452</b> | [Tetranectin precursor (TN) (C-type lectin domain family 3 member B), (Plasminogen kringle 4-binding protein).]                                                                                                                                                                                                                                                                           | Extracellular |
| <b>P05543</b> | [Thyroxine-binding globulin precursor (T4-binding globulin) (Serpine, A7).]                                                                                                                                                                                                                                                                                                               | Extracellular |
| <b>P07477</b> | [Trypsin-1 precursor (EC 3.4.21.4) (Trypsin I) (Cationic trypsinogen), (Serine protease 1).]                                                                                                                                                                                                                                                                                              | Extracellular |
| <b>P04004</b> | [Vitronectin precursor (Serum-spreading factor) (S-protein) (V75), [Contains: Vitronectin V65 subunit; Vitronectin V10 subunit;, Somatomedin B].]                                                                                                                                                                                                                                         | Extracellular |
| <b>P41221</b> | Protein Wnt-5a precursor.                                                                                                                                                                                                                                                                                                                                                                 | Extracellular |
| <b>Q9Y6F9</b> | Protein Wnt-6 precursor.                                                                                                                                                                                                                                                                                                                                                                  | Extracellular |

|               |                                                                                                                                                                                                                                                                     |                        |
|---------------|---------------------------------------------------------------------------------------------------------------------------------------------------------------------------------------------------------------------------------------------------------------------|------------------------|
| <b>O15442</b> | [Metallophosphoesterase domain-containing protein 1 (Adult brain, protein 239) (239AB).]                                                                                                                                                                            | Go Component not found |
| <b>P30154</b> | [Serine/threonine-protein phosphatase 2A 65 kDa regulatory subunit A, beta isoform (PP2A, subunit A, PR65-beta isoform) (PP2A, subunit A., R1-beta isoform).]                                                                                                       | Go Component not found |
| <b>Q9UPM8</b> | [AP-4 complex subunit epsilon-1 (Adapter-related protein complex 4, subunit epsilon-1) (Epsilon subunit of AP-4) (AP-4 adapter complex, subunit epsilon).]                                                                                                          | Go Component not found |
| <b>O60423</b> | [Probable phospholipid-transporting ATPase IK (EC 3.6.3.1) (ATPase, class I type 8B member 3).]                                                                                                                                                                     | Go Component not found |
| <b>Q9UGI9</b> | [5'-AMP-activated protein kinase subunit gamma-3 (AMPK gamma-3 chain), (AMPK gamma3).]                                                                                                                                                                              | Go Component not found |
| <b>P16219</b> | [Short-chain specific acyl-CoA dehydrogenase, mitochondrial precursor, (EC 1.3.99.2) (SCAD) (Butyryl-CoA dehydrogenase).]                                                                                                                                           | Go Component not found |
| <b>P11766</b> | [Alcohol dehydrogenase class-3 (EC 1.1.1.1) (Alcohol dehydrogenase, class-III) (Alcohol dehydrogenase class chi chain) (S-, (hydroxymethyl)glutathione dehydrogenase) (EC 1.1.1.284) (Glutathione-, dependent formaldehyde dehydrogenase) (FDH).]                   | Go Component not found |
| <b>P55198</b> | Protein AF-17.                                                                                                                                                                                                                                                      | Go Component not found |
| <b>Q9Y2D5</b> | [A-kinase anchor protein 2 (Protein kinase A-anchoring protein 2), (PRKA2) (AKAP-2) (AKAP-KL).]                                                                                                                                                                     | Go Component not found |
| <b>P01876</b> | Ig alpha-1 chain C region.                                                                                                                                                                                                                                          | Go Component not found |
| <b>Q16671</b> | [Anti-Muellerian hormone type-2 receptor precursor (EC 2.7.11.30), (Anti-Muellerian hormone type II receptor) (AMH type II receptor) (MIS, type II receptor) (MISRII) (MRII).]                                                                                      | Go Component not found |
| <b>Q01484</b> | Ankyrin-2 (Brain ankyrin) (Ankyrin-B) (Ankyrin, nonerythroid).                                                                                                                                                                                                      | Go Component not found |
| <b>P51164</b> | [Potassium-transporting ATPase subunit beta (Proton pump beta chain), (Gastric H(+)/K(+) ATPase beta subunit).]                                                                                                                                                     | Go Component not found |
| <b>O95450</b> | [ADAMTS-2 precursor (EC 3.4.24.14) (A disintegrin and metalloproteinase, with thrombospondin motifs 2) (ADAM-TS 2) (ADAM-TS2) (Procollagen I/II, amino propeptide-processing enzyme) (Procollagen I N-proteinase) (PC, I-NP) (Procollagen N-endopeptidase) (pNPI).] | Go Component not found |
| <b>Q9UP79</b> | [ADAMTS-8 precursor (EC 3.4.24.-) (A disintegrin and metalloproteinase, with thrombospondin motifs 8) (ADAM-TS 8) (ADAM-TS8) (METH-2) (METH-, 8).]                                                                                                                  | Go Component not found |
| <b>P61769</b> | [Beta-2-microglobulin precursor [Contains: Beta-2-microglobulin form pl, 5.3].]                                                                                                                                                                                     | Go Component not found |
| <b>P54132</b> | [Bloom syndrome protein (EC 3.6.1.-) (RecQ protein-like 3) (DNA, helicase, RecQ-like type 2).]                                                                                                                                                                      | Go Component not found |
| <b>P13497</b> | [Bone morphogenetic protein 1 precursor (EC 3.4.24.19) (BMP-1), (Procollagen C-proteinase) (PCP) (Mammalian tolloid protein) (mTld).]                                                                                                                               | Go Component not found |
| <b>P25440</b> | Bromodomain-containing protein 2 (Protein RING3) (O27.1.1).                                                                                                                                                                                                         | Go Component not found |
| <b>Q9ULD4</b> | Bromodomain and PHD finger-containing protein 3.                                                                                                                                                                                                                    | Go Component not found |

|               |                                                                                                                                                                                    |                        |
|---------------|------------------------------------------------------------------------------------------------------------------------------------------------------------------------------------|------------------------|
| <b>P09871</b> | [Complement C1s subcomponent precursor (EC 3.4.21.42) (C1 esterase), [Contains: Complement C1s subcomponent heavy chain; Complement C1s, subcomponent light chain].]               | Go Component not found |
| <b>P02458</b> | [Collagen alpha-1(II) chain precursor (Alpha-1 type II collagen), [Contains: Chondrocalcin].]                                                                                      | Go Component not found |
| <b>P29377</b> | [Protein S100-G (S100 calcium-binding protein G) (Vitamin D-dependent, calcium-binding protein, intestinal) (CABP) (Calbindin-D9k).]                                               | Go Component not found |
| <b>P19022</b> | [Cadherin-2 precursor (Neural-cadherin) (N-cadherin) (CD325 antigen), (CDw325).]                                                                                                   | Go Component not found |
| <b>P55290</b> | [Cadherin-13 precursor (Truncated-cadherin) (T-cadherin) (T-cad), (Heart-cadherin) (H-cadherin) (P105).]                                                                           | Go Component not found |
| <b>P07451</b> | [Carbonic anhydrase 3 (EC 4.2.1.1) (Carbonic anhydrase III) (Carbonate, dehydratase III) (CA-III).]                                                                                | Go Component not found |
| <b>P32004</b> | Neural cell adhesion molecule L1 precursor (N-CAM L1) (CD171 antigen).                                                                                                             | Go Component not found |
| <b>Q9UMQ6</b> | [Calpain-11 (EC 3.4.22.-) (Calcium-activated neutral proteinase 11), (CANP 11).]                                                                                                   | Go Component not found |
| <b>Q01518</b> | Adenylyl cyclase-associated protein 1 (CAP 1).                                                                                                                                     | Go Component not found |
| <b>Q9UN75</b> | Protocadherin alpha 12 precursor (PCDH-alpha12).                                                                                                                                   | Go Component not found |
| <b>P51959</b> | Cyclin-G1 (Cyclin-G).                                                                                                                                                              | Go Component not found |
| <b>Q9NSE2</b> | [Cytokine-inducible SH2-containing protein (CIS) (CIS-1) (Suppressor of, cytokine signaling) (SOCS) (Protein G18).]                                                                | Go Component not found |
| <b>P51788</b> | Chloride channel protein 2 (ClC-2).                                                                                                                                                | Go Component not found |
| <b>Q14123</b> | [Calcium/calmodulin-dependent 3',5'-cyclic nucleotide phosphodiesterase, 1C (EC 3.1.4.17) (Cam-PDE 1C) (hCam-3).]                                                                  | Go Component not found |
| <b>Q14432</b> | [cGMP-inhibited 3',5'-cyclic phosphodiesterase A (EC 3.1.4.17) (Cyclic, GMP-inhibited phosphodiesterase A) (CGI-PDE A).]                                                           | Go Component not found |
| <b>Q99829</b> | Copine-1 (Copine I).                                                                                                                                                               | Go Component not found |
| <b>O43924</b> | [Retinal rod rhodopsin-sensitive cGMP 3',5'-cyclic phosphodiesterase, subunit delta (EC 3.1.4.17) (GMP-PDE delta) (p17 protein).]                                                  | Go Component not found |
| <b>POCOL5</b> | [Complement C4-B precursor (Basic complement C4) [Contains: Complement, C4 beta chain; Complement C4-B alpha chain; C4a anaphylatoxin; C4b-B;, C4d-B; Complement C4 gamma chain].] | Go Component not found |
| <b>P07360</b> | Complement component C8 gamma chain precursor.                                                                                                                                     | Go Component not found |
| <b>O00763</b> | [Acetyl-CoA carboxylase 2 (EC 6.4.1.2) (ACC-beta) [Includes: Biotin, carboxylase (EC 6.3.4.14)].]                                                                                  | Go Component not found |
| <b>P00395</b> | [Cytochrome c oxidase subunit 1 (EC 1.9.3.1) (Cytochrome c oxidase, polypeptide I).]                                                                                               | Go Component not found |

|               |                                                                                                                                                                                                                                                                                                                                                                                                                      |                        |
|---------------|----------------------------------------------------------------------------------------------------------------------------------------------------------------------------------------------------------------------------------------------------------------------------------------------------------------------------------------------------------------------------------------------------------------------|------------------------|
| <b>P22680</b> | [Cytochrome P450 7A1 (Cholesterol 7-alpha-monooxygenase) (CYPVII), (EC 1.14.13.17) (Cholesterol 7-alpha-hydroxylase).]                                                                                                                                                                                                                                                                                               | Go Component not found |
| <b>P10635</b> | [Cytochrome P450 2D6 (EC 1.14.14.1) (CYP1D6) (P450-DB1) (Debrisoquine, 4-hydroxylase).]                                                                                                                                                                                                                                                                                                                              | Go Component not found |
| <b>P48740</b> | [Complement-activating component of Ra-reactive factor precursor, (EC 3.4.21.-) (Ra-reactive factor serine protease p100) (RaRF), (Mannan-binding lectin serine protease 1) (Mannose-binding protein-, associated serine protease) (MASP-1) (Serine protease 5) [Contains:, Complement-activating component of Ra-reactive factor heavy chain;, Complement-activating component of Ra-reactive factor light chain].] | Go Component not found |
| <b>P82279</b> | Crumbs homolog 1 precursor.                                                                                                                                                                                                                                                                                                                                                                                          | Go Component not found |
| <b>Q9Y6H8</b> | Gap junction alpha-3 protein (Connexin-46) (Cx46).                                                                                                                                                                                                                                                                                                                                                                   | Go Component not found |
| <b>Q14094</b> | Cyclin-I.                                                                                                                                                                                                                                                                                                                                                                                                            | Go Component not found |
| <b>P33402</b> | Guanylate cyclase soluble subunit alpha-2 (EC 4.6.1.2) (GCS-alpha-2).                                                                                                                                                                                                                                                                                                                                                | Go Component not found |
| <b>Q08752</b> | [40 kDa peptidyl-prolyl cis-trans isomerase (EC 5.2.1.8) (PPIase), (Rotamase) (Cyclophilin-40) (CYP-40) (Cyclophilin-related protein).]                                                                                                                                                                                                                                                                              | Go Component not found |
| <b>P62940</b> | [Peptidyl-prolyl cis-trans isomerase A (EC 5.2.1.8) (PPIase A), (Rotamase A) (Cyclophilin A) (Cyclosporin A-binding protein).]                                                                                                                                                                                                                                                                                       | Go Component not found |
| <b>P04080</b> | Cystatin-B (Stefin-B) (Liver thiol proteinase inhibitor) (CPI-B).                                                                                                                                                                                                                                                                                                                                                    | Go Component not found |
| <b>P19113</b> | Histidine decarboxylase (EC 4.1.1.22) (HDC).                                                                                                                                                                                                                                                                                                                                                                         | Go Component not found |
| <b>Q92466</b> | [DNA damage-binding protein 2 (Damage-specific DNA-binding protein 2), (DDB p48 subunit) (DDBb) (UV-damaged DNA-binding protein 2) (UV-DDB, 2).]                                                                                                                                                                                                                                                                     | Go Component not found |
| <b>Q01524</b> | Defensin-6 precursor (Defensin, alpha 6).                                                                                                                                                                                                                                                                                                                                                                            | Go Component not found |
| <b>O75828</b> | [Carbonyl reductase [NADPH] 3 (EC 1.1.1.184) (NADPH-dependent carbonyl, reductase 3).]                                                                                                                                                                                                                                                                                                                               | Go Component not found |
| <b>Q9UNQ2</b> | [Probable dimethyladenosine transferase (EC 2.1.1.-) (S-, adenosylmethionine-6-N',N'-adenosyl(rRNA) dimethyltransferase) (18S, rRNA dimethylase) (DIM1 dimethyladenosine transferase 1-like).]                                                                                                                                                                                                                       | Go Component not found |
| <b>P25686</b> | [DnaJ homolog subfamily B member 2 (Heat shock 40 kDa protein 3) (DnaJ, protein homolog 1) (HSJ-1).]                                                                                                                                                                                                                                                                                                                 | Go Component not found |
| <b>P49917</b> | [DNA ligase 4 (EC 6.5.1.1) (DNA ligase IV) (Polydeoxyribonucleotide, synthase [ATP] 4).]                                                                                                                                                                                                                                                                                                                             | Go Component not found |
| <b>Q9C005</b> | Dpy-30-like protein.                                                                                                                                                                                                                                                                                                                                                                                                 | Go Component not found |
| <b>O60673</b> | DNA polymerase zeta catalytic subunit (EC 2.7.7.7) (hREV3).                                                                                                                                                                                                                                                                                                                                                          | Go Component not found |
| <b>O14531</b> | [Dihydropyrimidinase-related protein 4 (DRP-4) (Collapsin response, mediator protein 3) (CRMP-3) (UNC33-like phosphoprotein 4) (ULIP4, protein).]                                                                                                                                                                                                                                                                    | Go Component not found |

|               |                                                                                                                                                                                                                                                                       |                        |
|---------------|-----------------------------------------------------------------------------------------------------------------------------------------------------------------------------------------------------------------------------------------------------------------------|------------------------|
| <b>P55039</b> | Developmentally-regulated GTP-binding protein 2 (DRG 2).                                                                                                                                                                                                              | Go Component not found |
| <b>Q05193</b> | Dynamin-1 (EC 3.6.5.5).                                                                                                                                                                                                                                               | Go Component not found |
| <b>Q05639</b> | [Elongation factor 1-alpha 2 (EF-1-alpha-2) (Elongation factor 1 A-2), (eEF1A-2) (Statin S1).]                                                                                                                                                                        | Go Component not found |
| <b>P13929</b> | [Beta-enolase (EC 4.2.1.11) (2-phospho-D-glycerate hydro-lyase), (Muscle-specific enolase) (MSE) (Skeletal muscle enolase) (Enolase 3).]                                                                                                                              | Go Component not found |
| <b>P53602</b> | [Diphosphomevalonate decarboxylase (EC 4.1.1.33) (Mevalonate, pyrophosphate decarboxylase) (Mevalonate (diphospho)decarboxylase).]                                                                                                                                    | Go Component not found |
| <b>Q03468</b> | [DNA excision repair protein ERCC-6 (EC 3.6.1.-) (ATP-dependent, helicase ERCC6) (Cockayne syndrome protein CSB).]                                                                                                                                                    | Go Component not found |
| <b>P41161</b> | ETS translocation variant 5 (Ets-related protein ERM).                                                                                                                                                                                                                | Go Component not found |
| <b>P30042</b> | [ES1 protein homolog, mitochondrial precursor (Protein KNP-I) (Protein, GT335).]                                                                                                                                                                                      | Go Component not found |
| <b>P41212</b> | [Transcription factor ETV6 (ETS-related protein Tel1) (Tel) (ETS, translocation variant 6).]                                                                                                                                                                          | Go Component not found |
| <b>P57679</b> | Ellis-van Creveld syndrome protein (DWF-1).                                                                                                                                                                                                                           | Go Component not found |
| <b>O43909</b> | [Exostosin-like 3 (EC 2.4.1.223) (Glucuronyl-galactosyl-proteoglycan 4-, alpha-N-acetylglucosaminyltransferase) (Putative tumor suppressor, protein EXTL3) (Multiple exostosin-like protein 3) (Hereditary, multiple exostosin gene isolog) (EXT-related protein 1).] | Go Component not found |
| <b>O60825</b> | [6-phosphofructo-2-kinase/fructose-2,6-bisphosphatase 2 (6PF-2-K/Fru-, 2,6-P2ASE heart-type isozyme) (PFK-2/FBPase-2) [Includes: 6-, phosphofructo-2-kinase (EC 2.7.1.105); Fructose-2,6-bisphosphatase, (EC 3.1.3.46)].]                                             | Go Component not found |
| <b>P07332</b> | Proto-oncogene tyrosine-protein kinase Fes/Fps (EC 2.7.10.2) (C-Fes).                                                                                                                                                                                                 | Go Component not found |
| <b>P36980</b> | [Complement factor H-related protein 2 precursor (FHR-2) (H factor-like, protein 2) (H factor-like 3) (DDESK59).]                                                                                                                                                     | Go Component not found |
| <b>Q14318</b> | [FK506-binding protein 8 (EC 5.2.1.8) (Peptidyl-prolyl cis-trans, isomerase) (PPlase) (Rotamase) (38 kDa FK506-binding protein), (FKBPR38) (hFKBP38).]                                                                                                                | Go Component not found |
| <b>P30043</b> | [Flavin reductase (EC 1.5.1.30) (FR) (NADPH-dependent diaphorase), (NADPH-flavin reductase) (FLR) (Biliverdin reductase B) (EC 1.3.1.24), (BVR-B) (Biliverdin-IX beta-reductase) (Green heme-binding protein), (GHBP).]                                               | Go Component not found |
| <b>P51816</b> | [AF4/FMR2 family member 2 (Fragile X mental retardation 2 protein), (Protein FMR-2) (FMR2P) (Protein Ox19) (Fragile X E mental retardation, syndrome protein).]                                                                                                       | Go Component not found |
| <b>O75891</b> | [10-formyltetrahydrofolate dehydrogenase (EC 1.5.1.6) (10-FTHFDH), (Aldehyde dehydrogenase 1 family member L1).]                                                                                                                                                      | Go Component not found |
| <b>O00591</b> | [Gamma-aminobutyric-acid receptor subunit pi precursor (GABA(A), receptor subunit pi).]                                                                                                                                                                               | Go Component not found |
| <b>O14976</b> | Cyclin G-associated kinase (EC 2.7.11.1).                                                                                                                                                                                                                             | Go Component not found |
| <b>P78537</b> | [Biogenesis of lysosome-related organelles complex-1 subunit 1 (BLOC-1, subunit 1) (GCN5-like protein 1) (RT14 protein).]                                                                                                                                             | Go Component not found |

|               |                                                                                                                                                                                                                                                              |                        |
|---------------|--------------------------------------------------------------------------------------------------------------------------------------------------------------------------------------------------------------------------------------------------------------|------------------------|
| <b>Q14397</b> | Glucokinase regulatory protein (Glucokinase regulator).                                                                                                                                                                                                      | Go Component not found |
| <b>Q9NR23</b> | Growth/differentiation factor 3 precursor (GDF-3).                                                                                                                                                                                                           | Go Component not found |
| <b>P52306</b> | [Rap1 GTPase-GDP dissociation stimulator 1 (SMG P21 stimulatory GDP/GTP, exchange protein) (SMG GDS protein) (Exchange factor smgGDS).]                                                                                                                      | Go Component not found |
| <b>Q13070</b> | G antigen 6 (GAGE-6).                                                                                                                                                                                                                                        | Go Component not found |
| <b>P04062</b> | [Glucosylceramidase precursor (EC 3.2.1.45) (Beta-glucocerebrosidase), (Acid beta-glucosidase) (D-glucosyl-N-acylsphingosine glucohydrolase), (Alglucerase) (Imiglucerase).]                                                                                 | Go Component not found |
| <b>P10070</b> | Zinc finger protein GLI2 (Tax helper protein).                                                                                                                                                                                                               | Go Component not found |
| <b>Q12967</b> | Ral guanine nucleotide dissociation stimulator (RalGEF) (RalGDS).                                                                                                                                                                                            | Go Component not found |
| <b>Q9NYM4</b> | [Probable G-protein coupled receptor 83 precursor (G-protein coupled, receptor 72).]                                                                                                                                                                         | Go Component not found |
| <b>Q14451</b> | [Growth factor receptor-bound protein 7 (GRB7 adapter protein), (Epidermal growth factor receptor GRB-7) (B47).]                                                                                                                                             | Go Component not found |
| <b>Q08117</b> | [Amino-terminal enhancer of split (Amino enhancer of split) (GRG, protein) (Protein ESP1) (Gp130-associated protein GAM).]                                                                                                                                   | Go Component not found |
| <b>O00178</b> | GTP-binding protein 1 (G-protein 1) (GP-1) (GP1).                                                                                                                                                                                                            | Go Component not found |
| <b>P30712</b> | Glutathione S-transferase theta-2 (EC 2.5.1.18) (GST class-theta-2).                                                                                                                                                                                         | Go Component not found |
| <b>P84243</b> | Histone H3.3.                                                                                                                                                                                                                                                | Go Component not found |
| <b>O60229</b> | [Kalirin (Huntingtin-associated protein-interacting protein) (Protein, Duo).]                                                                                                                                                                                | Go Component not found |
| <b>P05537</b> | HLA class II histocompatibility antigen, DQ(W3) beta chain precursor.                                                                                                                                                                                        | Go Component not found |
| <b>P61921</b> | [Hemoglobin subunit gamma-2 (Hemoglobin gamma-2 chain) (Gamma-2-globin), (Hemoglobin gamma-G chain).]                                                                                                                                                        | Go Component not found |
| <b>P69891</b> | [Hemoglobin subunit gamma-1 (Hemoglobin gamma-1 chain) (Gamma-1-globin), (Hemoglobin gamma-A chain) (Hb F Agamma).]                                                                                                                                          | Go Component not found |
| <b>Q9Y5J3</b> | [Hairy/enhancer-of-split related with YRPW motif protein 1 (Hairy and, enhancer of split-related protein 1) (HESR-1) (Hairy-related, transcription factor 1) (hHRT1) (Cardiovascular helix-loop-helix, factor 2) (CHF-2) (HES-related repressor protein 1).] | Go Component not found |
| <b>P10074</b> | [Zinc finger and BTB domain-containing protein 48 (Krueppel-related, zinc finger protein 3) (Protein HKR3).]                                                                                                                                                 | Go Component not found |
| <b>P09067</b> | Homeobox protein Hox-B5 (Hox-2A) (HHO.C10) (HU-1).                                                                                                                                                                                                           | Go Component not found |
| <b>P30519</b> | Heme oxygenase 2 (EC 1.14.99.3) (HO-2).                                                                                                                                                                                                                      | Go Component not found |

|               |                                                                                                                                                                                                                                       |                        |
|---------------|---------------------------------------------------------------------------------------------------------------------------------------------------------------------------------------------------------------------------------------|------------------------|
| <b>P00739</b> | Haptoglobin-related protein precursor.                                                                                                                                                                                                | Go Component not found |
| <b>P17066</b> | Heat shock 70 kDa protein 6 (Heat shock 70 kDa protein B').                                                                                                                                                                           | Go Component not found |
| <b>Q03933</b> | [Heat shock factor protein 2 (HSF 2) (Heat shock transcription factor, 2) (HSTF 2).]                                                                                                                                                  | Go Component not found |
| <b>O43364</b> | Homeobox protein Hox-A2.                                                                                                                                                                                                              | Go Component not found |
| <b>P31271</b> | Homeobox protein Hox-A13 (Hox-1J).                                                                                                                                                                                                    | Go Component not found |
| <b>P31274</b> | Homeobox protein Hox-C9 (Hox-3B).                                                                                                                                                                                                     | Go Component not found |
| <b>P31275</b> | Homeobox protein Hox-C12 (Hox-3F).                                                                                                                                                                                                    | Go Component not found |
| <b>P19367</b> | [Hexokinase-1 (EC 2.7.1.1) (Hexokinase type I) (HK I) (Brain form, hexokinase).]                                                                                                                                                      | Go Component not found |
| <b>P07099</b> | [Epoxide hydrolase 1 (EC 3.3.2.9) (Microsomal epoxide hydrolase), (Epoxide hydratase).]                                                                                                                                               | Go Component not found |
| <b>P29466</b> | [Caspase-1 precursor (EC 3.4.22.36) (CASP-1) (Interleukin-1 beta, convertase) (IL-1BC) (IL-1 beta-converting enzyme) (ICE) (Interleukin-, 1 beta-converting enzyme) (p45) [Contains: Caspase-1 subunit p20;, Caspase-1 subunit p10].] | Go Component not found |
| <b>Q01101</b> | Insulinoma-associated protein 1 (Zinc finger protein IA-1).                                                                                                                                                                           | Go Component not found |
| <b>P18065</b> | [Insulin-like growth factor-binding protein 2 precursor (IGFBP-2) (IBP-, 2) (IGF-binding protein 2).]                                                                                                                                 | Go Component not found |
| <b>P31944</b> | [Caspase-14 precursor (EC 3.4.22.-) (CASP-14) [Contains: Caspase-14, subunit 1; Caspase-14 subunit 2].]                                                                                                                               | Go Component not found |
| <b>O75821</b> | [Eukaryotic translation initiation factor 3 subunit 4 (eIF-3 delta), (eIF3 p44) (eIF-3 RNA-binding subunit) (eIF3 p42) (eIF3g).]                                                                                                      | Go Component not found |
| <b>PO1344</b> | [Insulin-like growth factor II precursor (IGF-II) (Somatomedin A), [Contains: Insulin-like growth factor II Ala-25 Del].]                                                                                                             | Go Component not found |
| <b>Q15653</b> | [NF-kappa-B inhibitor beta (NF-kappa-BIB) (I-kappa-B-beta), (IkappaBbeta) (IKB-beta) (IKB-B) (Thyroid receptor-interacting protein, 9) (TRIP-9) (TR-interacting protein 9).]                                                          | Go Component not found |
| <b>P20839</b> | [Inosine-5'-monophosphate dehydrogenase 1 (EC 1.1.1.205) (IMP, dehydrogenase 1) (IMPDH-I) (IMPD 1).]                                                                                                                                  | Go Component not found |
| <b>P49441</b> | Inositol polyphosphate 1-phosphatase (EC 3.1.3.57) (IPPase) (IPP).                                                                                                                                                                    | Go Component not found |
| <b>P27987</b> | [Inositol-trisphosphate 3-kinase B (EC 2.7.1.127) (Inositol 1,4,5-, trisphosphate 3-kinase B) (IP3K B) (IP3 3-kinase B) (IP3K-B).]                                                                                                    | Go Component not found |
| <b>P10745</b> | [Interphotoreceptor retinoid-binding protein precursor (IRBP), (Interstitial retinol-binding protein).]                                                                                                                               | Go Component not found |
| <b>Q14653</b> | Interferon regulatory factor 3 (IRF-3).                                                                                                                                                                                               | Go Component not found |



|               |                                                                                                                                                                                                                                                                                                                                                                                   |                        |
|---------------|-----------------------------------------------------------------------------------------------------------------------------------------------------------------------------------------------------------------------------------------------------------------------------------------------------------------------------------------------------------------------------------|------------------------|
| <b>Q9Y4H2</b> | Insulin receptor substrate 2 (IRS-2).                                                                                                                                                                                                                                                                                                                                             | Go Component not found |
| <b>Q13683</b> | [Integrin alpha-7 precursor [Contains: Integrin alpha-7 heavy chain;, Integrin alpha-7 light chain].]                                                                                                                                                                                                                                                                             | Go Component not found |
| <b>Q08881</b> | [Tyrosine-protein kinase ITK/TSK (EC 2.7.10.2) (T-cell-specific kinase), (Tyrosine-protein kinase Lyk) (Kinase EMT).]                                                                                                                                                                                                                                                             | Go Component not found |
| <b>P35527</b> | [Keratin, type I cytoskeletal 9 (Cytokeratin-9) (CK-9) (Keratin-9), (K9).]                                                                                                                                                                                                                                                                                                        | Go Component not found |
| <b>O76014</b> | Keratin, type I cuticular Ha7 (Hair keratin, type I Ha7).                                                                                                                                                                                                                                                                                                                         | Go Component not found |
| <b>P51812</b> | [Ribosomal protein S6 kinase alpha-3 (EC 2.7.11.1) (S6K-alpha 3) (90, kDa ribosomal protein S6 kinase 3) (p90-RSK 3) (Ribosomal S6 kinase 2), (RSK-2) (pp90RSK2) (Insulin-stimulated protein kinase 1) (ISPK-1) (MAP, kinase-activated protein kinase 1b) (MAPKAPK1B).]                                                                                                           | Go Component not found |
| <b>P01834</b> | Ig kappa chain C region.                                                                                                                                                                                                                                                                                                                                                          | Go Component not found |
| <b>P52824</b> | [Diacylglycerol kinase theta (EC 2.7.1.107) (Diglyceride kinase theta), (DGK-theta) (DAG kinase theta).]                                                                                                                                                                                                                                                                          | Go Component not found |
| <b>O75840</b> | Krueppel-like factor 7 (Ubiquitous krueppel-like factor).                                                                                                                                                                                                                                                                                                                         | Go Component not found |
| <b>P06870</b> | [Kallikrein-1 precursor (EC 3.4.21.35) (Tissue kallikrein), (Kidney/pancreas/salivary gland kallikrein).]                                                                                                                                                                                                                                                                         | Go Component not found |
| <b>P24723</b> | Protein kinase C eta type (EC 2.7.11.13) (nPKC-eta) (PKC-L).                                                                                                                                                                                                                                                                                                                      | Go Component not found |
| <b>P01842</b> | Ig lambda chain C regions.                                                                                                                                                                                                                                                                                                                                                        | Go Component not found |
| <b>O60488</b> | [Long-chain-fatty-acid--CoA ligase 4 (EC 6.2.1.3) (Long-chain acyl-CoA, synthetase 4) (LACS 4).]                                                                                                                                                                                                                                                                                  | Go Component not found |
| <b>P81274</b> | G-protein-signaling modulator 2 (Mosaic protein LGN).                                                                                                                                                                                                                                                                                                                             | Go Component not found |
| <b>Q8WWY8</b> | [Lipase member H precursor (EC 3.1.1.-) (Membrane-associated, phosphatidic acid-selective phospholipase A1-alpha) (mPA-PLA1 alpha), (LPD lipase-related protein) (Phospholipase A1 member B).]                                                                                                                                                                                    | Go Component not found |
| <b>O15230</b> | Laminin subunit alpha-5 precursor.                                                                                                                                                                                                                                                                                                                                                | Go Component not found |
| <b>Q9UQQ2</b> | [SH2B adapter protein 3 (Lymphocyte-specific adapter protein Lnk), (Signal transduction protein Lnk) (Lymphocyte adapter protein).]                                                                                                                                                                                                                                               | Go Component not found |
| <b>O60711</b> | Leupaxin.                                                                                                                                                                                                                                                                                                                                                                         | Go Component not found |
| <b>O00754</b> | [Lysosomal alpha-mannosidase precursor (EC 3.2.1.24) (Mannosidase, alpha B) (Lysosomal acid alpha-mannosidase) (Laman) (Mannosidase alpha, class 2B member 1) [Contains: Lysosomal alpha-mannosidase A peptide;, Lysosomal alpha-mannosidase B peptide; Lysosomal alpha-mannosidase C, peptide; Lysosomal alpha-mannosidase D peptide; Lysosomal alpha-, mannosidase E peptide].] | Go Component not found |

|               |                                                                                                                                                                                                                                                                                          |                        |
|---------------|------------------------------------------------------------------------------------------------------------------------------------------------------------------------------------------------------------------------------------------------------------------------------------------|------------------------|
| <b>Q13233</b> | [Mitogen-activated protein kinase kinase kinase 1 (EC 2.7.11.25), (MAPK/ERK kinase kinase 1) (MEK kinase 1) (MEKK 1).]                                                                                                                                                                   | Go Component not found |
| <b>O43318</b> | [Mitogen-activated protein kinase kinase kinase 7 (EC 2.7.11.25), (Transforming growth factor-beta-activated kinase 1) (TGF-beta-, activated kinase 1).]                                                                                                                                 | Go Component not found |
| <b>P43363</b> | Melanoma-associated antigen 10 (MAGE-10 antigen).                                                                                                                                                                                                                                        | Go Component not found |
| <b>O00187</b> | [Mannan-binding lectin serine protease 2 precursor (EC 3.4.21.104), (Mannose-binding protein-associated serine protease 2) (MASP-2) (MBL-, associated serine protease 2) [Contains: Mannan-binding lectin serine, protease 2 A chain; Mannan-binding lectin serine protease 2 B chain].] | Go Component not found |
| <b>P61244</b> | Protein max (Myc-associated factor X).                                                                                                                                                                                                                                                   | Go Component not found |
| <b>Q9UI95</b> | [Mitotic spindle assembly checkpoint protein MAD2B (MAD2-like 2), (hREV7).]                                                                                                                                                                                                              | Go Component not found |
| <b>O15320</b> | [Cutaneous T-cell lymphoma-associated antigen 5 (cTAGE-5 protein), (cTAGE family member 5) (Meningioma-expressed antigen 6/11).]                                                                                                                                                         | Go Component not found |
| <b>O00470</b> | Homeobox protein Meis1.                                                                                                                                                                                                                                                                  | Go Component not found |
| <b>Q99707</b> | [Methionine synthase (EC 2.1.1.13) (5-methyltetrahydrofolate-, homocysteine methyltransferase) (Methionine synthase, vitamin-B12, dependent) (MS).]                                                                                                                                      | Go Component not found |
| <b>O43451</b> | [Maltase-glucoamylase, intestinal [Includes: Maltase (EC 3.2.1.20), (Alpha-glucosidase); Glucoamylase (EC 3.2.1.3) (Glucan 1,4-alpha-, glucosidase).]                                                                                                                                    | Go Component not found |
| <b>P28482</b> | [Mitogen-activated protein kinase 1 (EC 2.7.11.24) (Extracellular, signal-regulated kinase 2) (ERK-2) (Mitogen-activated protein kinase, 2) (MAP kinase 2) (MAPK 2) (p42-MAPK) (ERT1).]                                                                                                  | Go Component not found |
| <b>P53779</b> | [Mitogen-activated protein kinase 10 (EC 2.7.11.24) (Stress-activated, protein kinase JNK3) (c-Jun N-terminal kinase 3) (MAP kinase p49, 3F12).]                                                                                                                                         | Go Component not found |
| <b>Q99583</b> | Max-binding protein MNT (Protein ROX) (Myc antagonist MNT).                                                                                                                                                                                                                              | Go Component not found |
| <b>P50221</b> | Homeobox protein MOX-1 (Mesenchyme homeobox 1).                                                                                                                                                                                                                                          | Go Component not found |
| <b>P42898</b> | Methylenetetrahydrofolate reductase (EC 1.5.1.20).                                                                                                                                                                                                                                       | Go Component not found |
| <b>Q9Y216</b> | Myotubularin-related protein 7 (EC 3.1.3.-).                                                                                                                                                                                                                                             | Go Component not found |
| <b>P12882</b> | [Myosin-1 (Myosin heavy chain 1) (Myosin heavy chain 2x) (MyHC-2x), (Myosin heavy chain, skeletal muscle, adult 1) (Myosin heavy chain, IIx/d) (MyHC-IIx/d).]                                                                                                                            | Go Component not found |
| <b>Q9Y623</b> | [Myosin-4 (Myosin heavy chain 4) (Myosin heavy chain 2b) (MyHC-2b), (Myosin heavy chain, skeletal muscle, fetal) (Myosin heavy chain IIb), (MyHC-IIb).]                                                                                                                                  | Go Component not found |
| <b>O14732</b> | [Inositol monophosphatase 2 (EC 3.1.3.25) (IMPase 2) (IMP 2) (Inositol-, 1(or 4)-monophosphatase 2) (Myo-inositol monophosphatase A2).]                                                                                                                                                  | Go Component not found |
| <b>Q00872</b> | [Myosin-binding protein C, slow-type (Slow MyBP-C) (C-protein, skeletal, muscle slow isoform).]                                                                                                                                                                                          | Go Component not found |

|               |                                                                                                                                                         |                        |
|---------------|---------------------------------------------------------------------------------------------------------------------------------------------------------|------------------------|
| <b>Q9UPR5</b> | [Sodium/calcium exchanger 2 precursor (Na <sup>+</sup> )/Ca <sup>2+</sup> -exchange protein, 2).]                                                       | Go Component not found |
| <b>P17050</b> | [Alpha-N-acetylgalactosaminidase precursor (EC 3.2.1.49) (Alpha-, galactosidase B).]                                                                    | Go Component not found |
| <b>Q15784</b> | [Neurogenic differentiation factor 2 (NeuroD2) (NeuroD-related factor), (NDRF).]                                                                        | Go Component not found |
| <b>O76041</b> | Nebulette (Actin-binding Z-disk protein).                                                                                                               | Go Component not found |
| <b>Q92832</b> | [Protein kinase C-binding protein NELL1 precursor (NEL-like protein 1), (Nel-related protein 1).]                                                       | Go Component not found |
| <b>Q92686</b> | Neurogranin (Ng) (RC3).                                                                                                                                 | Go Component not found |
| <b>Q14938</b> | [Nuclear factor 1 X-type (Nuclear factor 1/X) (NF1-X) (NFI-X) (NF-I/X), (CCAAT-box-binding transcription factor) (CTF) (TGGCA-binding, protein).]       | Go Component not found |
| <b>Q16236</b> | [Nuclear factor erythroid 2-related factor 2 (NF-E2-related factor 2), (NFE2-related factor 2) (Nuclear factor, erythroid derived 2, like 2), (HEBP1).] | Go Component not found |
| <b>Q9UJF2</b> | Ras GTPase-activating protein nGAP (RAS protein activator-like 1).                                                                                      | Go Component not found |
| <b>Q99784</b> | [Noelin precursor (Neuronal olfactomedin-related ER localized protein), (Olfactomedin-1).]                                                              | Go Component not found |
| <b>Q99743</b> | [Neuronal PAS domain-containing protein 2 (Neuronal PAS2) (Member of, PAS protein 4) (Basic-helix-loop-helix-PAS protein MOP4).]                        | Go Component not found |
| <b>Q9NQX5</b> | [Neural proliferation differentiation and control protein 1 precursor, (NPDC-1).]                                                                       | Go Component not found |
| <b>Q9Y466</b> | [Orphan nuclear receptor NR2E1 (Nuclear receptor TLX) (Tailless, homolog) (TII) (hTII).]                                                                | Go Component not found |
| <b>Q9GZK3</b> | Olfactory receptor 2B2 (Olfactory receptor 6-1) (OR6-1) (Hs6M1-10).                                                                                     | Go Component not found |
| <b>O95222</b> | [Olfactory receptor 6A2 (Olfactory receptor OR11-83) (Olfactory, receptor 11-55) (OR11-55) (hP2 olfactory receptor).]                                   | Go Component not found |
| <b>Q9H209</b> | Olfactory receptor 10A4 (HP2) (Olfactory receptor-like protein JCG5).                                                                                   | Go Component not found |
| <b>Q02509</b> | Otoconin 90 precursor (Oc90) (Phospholipase A2 homolog).                                                                                                | Go Component not found |
| <b>Q12889</b> | [Oviduct-specific glycoprotein precursor (Oviductal glycoprotein), (Oviductin) (Estrogen-dependent oviduct protein) (Mucin-9).]                         | Go Component not found |
| <b>O95948</b> | [One cut domain family member 2 (Transcription factor ONECUT-2) (OC-2), (Hepatocyte nuclear factor 6-beta) (HNF-6-beta).]                               | Go Component not found |
| <b>Q9UBL9</b> | P2X purinoceptor 2 (ATP receptor) (P2X2) (Purinerbic receptor).                                                                                         | Go Component not found |

|               |                                                                                                                                                                                                                                                                                                                              |                        |
|---------------|------------------------------------------------------------------------------------------------------------------------------------------------------------------------------------------------------------------------------------------------------------------------------------------------------------------------------|------------------------|
| <b>P54886</b> | [Delta-1-pyrroline-5-carboxylate synthetase (P5CS) (Aldehyde, dehydrogenase 18 family member A1) [Includes: Glutamate 5-kinase, (EC 2.7.2.11) (Gamma-glutamyl kinase) (GK); Gamma-glutamyl phosphate, reductase (GPR) (EC 1.2.1.41) (Glutamate-5-semialdehyde dehydrogenase), (Glutamyl-gamma-semialdehyde dehydrogenase).]] | Go Component not found |
| <b>O00459</b> | [Phosphatidylinositol 3-kinase regulatory subunit beta (PI3-kinase p85, subunit beta) (PtdIns-3-kinase p85-beta).]                                                                                                                                                                                                           | Go Component not found |
| <b>Q02962</b> | Paired box protein Pax-2.                                                                                                                                                                                                                                                                                                    | Go Component not found |
| <b>P42785</b> | [Lysosomal Pro-X carboxypeptidase precursor (EC 3.4.16.2), (Prolylcarboxypeptidase) (PRCP) (Proline carboxypeptidase), (Angiotensinase C) (Lysosomal carboxypeptidase C).]                                                                                                                                                   | Go Component not found |
| <b>Q16342</b> | [Programmed cell death protein 2 (Zinc finger protein Rp-8) (Zinc, finger MYND domain-containing protein 7).]                                                                                                                                                                                                                | Go Component not found |
| <b>Q9Y2J8</b> | [Protein-arginine deiminase type-2 (EC 3.5.3.15) (Protein-arginine, deiminase type II) (Peptidylarginine deiminase II) (PAD-H19).]                                                                                                                                                                                           | Go Component not found |
| <b>O15055</b> | [Period circadian protein homolog 2 (Circadian clock protein PERIOD 2), (hPER2).]                                                                                                                                                                                                                                            | Go Component not found |
| <b>P16112</b> | [Aggrecan core protein precursor (Cartilage-specific proteoglycan core, protein) (CSPCP) (Chondroitin sulfate proteoglycan core protein 1), [Contains: Aggrecan core protein 2].]                                                                                                                                            | Go Component not found |
| <b>P00439</b> | [Phenylalanine-4-hydroxylase (EC 1.14.16.1) (PAH) (Phe-4-, monooxygenase).]                                                                                                                                                                                                                                                  | Go Component not found |
| <b>Q9H0N5</b> | [Pterin-4-alpha-carbinolamine dehydratase 2 (EC 4.2.1.96) (PHS 2) (4-, alpha-hydroxy-tetrahydropterin dehydratase 2) (DcoH-like protein, DCoHm) (Dimerization cofactor of hepatocyte nuclear factor 1 from, muscle) (HNF1-alpha dimerization cofactor).]                                                                     | Go Component not found |
| <b>P08567</b> | Pleckstrin (Platelet p47 protein).                                                                                                                                                                                                                                                                                           | Go Component not found |
| <b>Q9HCL2</b> | [Glycerol-3-phosphate acyltransferase, mitochondrial precursor, (EC 2.3.1.15) (GPAT).]                                                                                                                                                                                                                                       | Go Component not found |
| <b>Q15155</b> | Nodal modulator 1 precursor (pM5).                                                                                                                                                                                                                                                                                           | Go Component not found |
| <b>P10266</b> | [HERV-K_5q33.3 provirus ancestral Pol protein (HERV-K10 Pol protein), (HERV-K107 Pol protein) [Includes: Reverse transcriptase (RT), (EC 2.7.7.49); Ribonuclease H (EC 3.1.26.4) (RNase H); Integrase, (IN)].]                                                                                                               | Go Component not found |
| <b>Q9BZG2</b> | Testicular acid phosphatase precursor (EC 3.1.3.2).                                                                                                                                                                                                                                                                          | Go Component not found |
| <b>O14830</b> | [Serine/threonine-protein phosphatase with EF-hands 2 (EC 3.1.3.16), (PPEF-2).]                                                                                                                                                                                                                                              | Go Component not found |
| <b>Q92674</b> | [Centromere protein I (CENP-I) (Interphase centromere complex protein, 19) (Follicle-stimulating hormone primary response protein) (FSH, primary response protein 1) (Leucine-rich primary response protein 1).]                                                                                                             | Go Component not found |
| <b>P02812</b> | [Basic salivary proline-rich protein 2 (Salivary proline-rich protein), (Con1 glycoprotein) [Contains: Basic peptide P-F] (Fragment).]                                                                                                                                                                                       | Go Component not found |
| <b>P20472</b> | Parvalbumin alpha.                                                                                                                                                                                                                                                                                                           | Go Component not found |
| <b>Q13046</b> | Pregnancy-specific beta-1-glycoprotein 7 precursor (PSBG-7).                                                                                                                                                                                                                                                                 | Go Component not found |

|               |                                                                                                                                                                                                                                                       |                        |
|---------------|-------------------------------------------------------------------------------------------------------------------------------------------------------------------------------------------------------------------------------------------------------|------------------------|
| <b>P22234</b> | [Multifunctional protein ADE2 [Includes: Phosphoribosylaminoimidazole-, succinocarboxamide synthase (EC 6.3.2.6) (SAICAR synthetase);, Phosphoribosylaminoimidazole carboxylase (EC 4.1.1.21) (AIR, carboxylase) (AIRC)].]                            | Go Component not found |
| <b>P11172</b> | [Uridine 5'-monophosphate synthase (UMP synthase) [Includes: Orotate, phosphoribosyltransferase (EC 2.4.2.10) (OPRTase); Orotidine 5'-, phosphate decarboxylase (EC 4.1.1.23) (OMPdecase)].]                                                          | Go Component not found |
| <b>P62820</b> | Ras-related protein Rab-1A (YPT1-related protein).                                                                                                                                                                                                    | Go Component not found |
| <b>Q92930</b> | Ras-related protein Rab-8B.                                                                                                                                                                                                                           | Go Component not found |
| <b>P28749</b> | [Retinoblastoma-like protein 1 (107 kDa retinoblastoma-associated, protein) (PRB1) (P107).]                                                                                                                                                           | Go Component not found |
| <b>Q92781</b> | 11-cis retinol dehydrogenase (EC 1.1.1.105) (11-cis RDH).                                                                                                                                                                                             | Go Component not found |
| <b>P04090</b> | Prorelaxin H2 precursor [Contains: Relaxin B chain; Relaxin A chain].                                                                                                                                                                                 | Go Component not found |
| <b>P22670</b> | MHC class II regulatory factor RFX1 (RFX) (Enhancer factor C) (EF-C).                                                                                                                                                                                 | Go Component not found |
| <b>O15211</b> | [Ral guanine nucleotide dissociation stimulator-like 2 (RalGDS-like, factor) (RAS-associated protein RAB2L).]                                                                                                                                         | Go Component not found |
| <b>O43566</b> | Regulator of G-protein signaling 14 (RGS14).                                                                                                                                                                                                          | Go Component not found |
| <b>P61587</b> | [Rho-related GTP-binding protein RhoE precursor (Rho family GTPase 3), (Rnd3) (Rho8) (MemB protein).]                                                                                                                                                 | Go Component not found |
| <b>P18621</b> | 60S ribosomal protein L17 (L23).                                                                                                                                                                                                                      | Go Component not found |
| <b>P28067</b> | [HLA class II histocompatibility antigen, DM alpha chain precursor (MHC, class II antigen DMA).]                                                                                                                                                      | Go Component not found |
| <b>P51449</b> | [Nuclear receptor ROR-gamma (Retinoid-related orphan receptor-gamma), (Nuclear receptor RZR-gamma).]                                                                                                                                                  | Go Component not found |
| <b>Q9UET6</b> | [Putative ribosomal RNA methyltransferase 1 (EC 2.1.1.-) (rRNA, (uridine-2'-O-)-methyltransferase).]                                                                                                                                                  | Go Component not found |
| <b>Q9UI43</b> | [Putative ribosomal RNA methyltransferase 2 (EC 2.1.1.-) (rRNA, (uridine-2'-O-)-methyltransferase).]                                                                                                                                                  | Go Component not found |
| <b>Q96F10</b> | [Diamine acetyltransferase 2 (EC 2.3.1.57) (Spermidine/spermine N(1)-, acetyltransferase 2) (Polyamine N-acetyltransferase 2).]                                                                                                                       | Go Component not found |
| <b>P51172</b> | [Amiloride-sensitive sodium channel subunit delta (Epithelial Na(+), channel subunit delta) (Delta ENaC) (Nonvoltage-gated sodium channel 1, subunit delta) (SCNED) (Delta NaCH).]                                                                    | Go Component not found |
| <b>P55809</b> | [Succinyl-CoA:3-ketoacid-coenzyme A transferase 1, mitochondrial, precursor (EC 2.8.3.5) (Somatic-type succinyl CoA:3-oxoacid CoA-, transferase) (Scot-S).]                                                                                           | Go Component not found |
| <b>Q14141</b> | Septin-6.                                                                                                                                                                                                                                             | Go Component not found |
| <b>P23246</b> | [Splicing factor, proline- and glutamine-rich (Polypyrimidine tract-, binding protein-associated-splicing factor) (PTB-associated-splicing, factor) (PSF) (DNA-binding p52/p100 complex, 100 kDa subunit) (100 kDa, DNA-pairing protein) (hPOMp100).] | Go Component not found |

|               |                                                                                                                                                  |                        |
|---------------|--------------------------------------------------------------------------------------------------------------------------------------------------|------------------------|
| <b>Q12872</b> | [Splicing factor, arginine/serine-rich 8 (Suppressor of white apricot, protein homolog).]                                                        | Go Component not found |
| <b>O95905</b> | SGT1 protein (hSGT1) (Ecdysoneless homolog) (Suppressor of GCR2).                                                                                | Go Component not found |
| <b>Q14190</b> | Single-minded homolog 2.                                                                                                                         | Go Component not found |
| <b>Q9H3T3</b> | Semaphorin-6B precursor (Semaphorin Z) (Sema Z).                                                                                                 | Go Component not found |
| <b>Q9BY66</b> | [Histone demethylase JARID1D (EC 1.14.11.-) (Jumonji/ARID domain-, containing protein 1D) (Protein SmcY) (Histocompatibility Y antigen), (H-Y).] | Go Component not found |
| <b>P54920</b> | [Alpha-soluble NSF attachment protein (SNAP-alpha) (N-ethylmaleimide-, sensitive factor attachment protein, alpha).]                             | Go Component not found |
| <b>Q9Y5W8</b> | [Sorting nexin-13 (RGS domain- and PHOX domain-containing protein), (RGS-PX1).]                                                                  | Go Component not found |
| <b>P51688</b> | [N-sulphoglucosamine sulphohydrolase precursor (EC 3.10.1.1), (Sulfoglucosamine sulfamidase) (Sulphamidase).]                                    | Go Component not found |
| <b>P52788</b> | [Spermine synthase (EC 2.5.1.22) (Spermidine aminopropyltransferase), (SPMSY).]                                                                  | Go Component not found |
| <b>P12931</b> | [Proto-oncogene tyrosine-protein kinase Src (EC 2.7.10.2) (p60-Src) (c-, Src) (pp60c-src).]                                                      | Go Component not found |
| <b>P61266</b> | Syntaxin-1B (Syntaxin-1B1) (Syntaxin-1B2).                                                                                                       | Go Component not found |
| <b>Q9BXU1</b> | [Serine/threonine-protein kinase 31 (EC 2.7.11.1) (Serine/threonine-, protein kinase NYD-SPK) (Sugen kinase 396).]                               | Go Component not found |
| <b>P42226</b> | Signal transducer and activator of transcription 6 (IL-4 Stat).                                                                                  | Go Component not found |
| <b>O76039</b> | [Cyclin-dependent kinase-like 5 (EC 2.7.11.22) (Serine/threonine-, protein kinase 9).]                                                           | Go Component not found |
| <b>Q13277</b> | Syntaxin-3.                                                                                                                                      | Go Component not found |
| <b>P51687</b> | Sulfite oxidase, mitochondrial precursor (EC 1.8.3.1).                                                                                           | Go Component not found |
| <b>O95416</b> | Transcription factor SOX-14.                                                                                                                     | Go Component not found |
| <b>O43426</b> | [Synaptojanin-1 (EC 3.1.3.36) (Synaptic inositol-1,4,5-trisphosphate 5-, phosphatase 1).]                                                        | Go Component not found |
| <b>P17600</b> | Synapsin-1 (Synapsin I) (Brain protein 4.1).                                                                                                     | Go Component not found |
| <b>Q16143</b> | Beta-synuclein.                                                                                                                                  | Go Component not found |
| <b>Q9Y6Q2</b> | Stonin-1 (Stoned B-like factor).                                                                                                                 | Go Component not found |

|               |                                                                                                                                                                                                                                 |                        |
|---------------|---------------------------------------------------------------------------------------------------------------------------------------------------------------------------------------------------------------------------------|------------------------|
| <b>P13984</b> | [Transcription initiation factor IIF subunit beta (EC 3.6.1.-) (TFIIF-, beta) (ATP-dependent helicase GTF2F2) (General transcription factor, IIF subunit 2) (Transcription initiation factor RAP30).]                           | Go Component not found |
| <b>P62079</b> | [Tetraspanin-5 (Tspan-5) (Transmembrane 4 superfamily member 9), (Tetraspan NET-4).]                                                                                                                                            | Go Component not found |
| <b>Q9HD45</b> | [Transmembrane 9 superfamily protein member 3 precursor (SM-11044-, binding protein) (EP70-P-iso).]                                                                                                                             | Go Component not found |
| <b>P17542</b> | [T-cell acute lymphocytic leukemia protein 1 (TAL-1) (Stem cell, protein) (T-cell leukemia/lymphoma protein 5).]                                                                                                                | Go Component not found |
| <b>P68368</b> | [Tubulin alpha-4A chain (Tubulin alpha-4 chain) (Alpha-tubulin 4), (Alpha-tubulin isotype M-alpha-4).]                                                                                                                          | Go Component not found |
| <b>Q9Y4P3</b> | [Transducin beta-like 2 protein (WS beta-transducin repeats protein), (WS-betaTRP) (Williams-Beuren syndrome chromosome region 13 protein).]                                                                                    | Go Component not found |
| <b>P37275</b> | [Zinc finger E-box-binding homeobox 1 (Transcription factor 8) (NIL-2-A, zinc finger protein) (Negative regulator of IL2).]                                                                                                     | Go Component not found |
| <b>Q9BXT4</b> | Tudor domain-containing protein 1.                                                                                                                                                                                              | Go Component not found |
| <b>Q92664</b> | Transcription factor IIIA (Factor A) (TFIIIA).                                                                                                                                                                                  | Go Component not found |
| <b>Q13888</b> | [TFIIH basal transcription factor complex p44 subunit (Basic, transcription factor 2 44 kDa subunit) (BTF2-p44) (General, transcription factor IIH polypeptide 2).]                                                             | Go Component not found |
| <b>P31483</b> | [Nucleolysin TIA-1 isoform p40 (RNA-binding protein TIA-1) (p40-TIA-1), [Contains: Nucleolysin TIA-1 isoform p15 (p15-TIA-1)].]                                                                                                 | Go Component not found |
| <b>P47974</b> | [Butyrate response factor 2 (Protein TIS11D) (EGF-response factor 2), (ERF-2).]                                                                                                                                                 | Go Component not found |
| <b>P82094</b> | TATA element modulatory factor (TMF).                                                                                                                                                                                           | Go Component not found |
| <b>P50616</b> | Protein Tob1 (Transducer of erbB-2 1).                                                                                                                                                                                          | Go Component not found |
| <b>P00750</b> | [Tissue-type plasminogen activator precursor (EC 3.4.21.68) (tPA) (t-, PA) (t-plasminogen activator) (Alteplase) (Retelase) [Contains: Tissue-type plasminogen activator chain A; Tissue-type plasminogen, activator chain B].] | Go Component not found |
| <b>Q12931</b> | [Heat shock protein 75 kDa, mitochondrial precursor (HSP 75) (Tumor, necrosis factor type 1 receptor-associated protein) (TRAP-1) (TNFR-, associated protein 1).]                                                               | Go Component not found |
| <b>Q9UMR3</b> | T-box transcription factor TBX20 (T-box protein 20).                                                                                                                                                                            | Go Component not found |
| <b>P19971</b> | [Thymidine phosphorylase precursor (EC 2.4.2.4) (TdRPase) (TP), (Platelet-derived endothelial cell growth factor) (PD-ECGF), (Gliostatin).]                                                                                     | Go Component not found |
| <b>P51784</b> | [Ubiquitin carboxyl-terminal hydrolase 11 (EC 3.1.2.15) (Ubiquitin, thioesterase 11) (Ubiquitin-specific-processing protease 11), (Deubiquitinating enzyme 11).]                                                                | Go Component not found |
| <b>Q9Y2K6</b> | [Ubiquitin carboxyl-terminal hydrolase 20 (EC 3.1.2.15) (Ubiquitin, thioesterase 20) (Ubiquitin-specific-processing protease 20), (Deubiquitinating enzyme 20).]                                                                | Go Component not found |
| <b>O75534</b> | [Cold shock domain-containing protein E1 (UNR protein) (N-ras upstream, gene protein).]                                                                                                                                         | Go Component not found |

|               |                                                                                                                                                                                                                                                                     |                        |
|---------------|---------------------------------------------------------------------------------------------------------------------------------------------------------------------------------------------------------------------------------------------------------------------|------------------------|
| <b>P00749</b> | [Urokinase-type plasminogen activator precursor (EC 3.4.21.73) (uPA), (U-plasminogen activator) [Contains: Urokinase-type plasminogen, activator long chain A; Urokinase-type plasminogen activator short, chain A; Urokinase-type plasminogen activator chain B].] | Go Component not found |
| <b>P21281</b> | [Vacuolar ATP synthase subunit B, brain isoform (EC 3.6.3.14) (V-ATPase, subunit B 2) (Vacuolar proton pump subunit B 2) (Endomembrane proton, pump 58 kDa subunit) (HO57).]                                                                                        | Go Component not found |
| <b>Q9UKW4</b> | Protein vav-3.                                                                                                                                                                                                                                                      | Go Component not found |
| <b>P37235</b> | [Hippocalcin-like protein 1 (Visinin-like protein 3) (VILIP-3), (Calcium-binding protein BDR-1) (HLP2).]                                                                                                                                                            | Go Component not found |
| <b>Q9UPY6</b> | [Wiskott-Aldrich syndrome protein family member 3 (WASP-family protein, member 3) (Protein WAVE-3) (Verprolin homology domain-containing, protein 3).]                                                                                                              | Go Component not found |
| <b>Q9NNW5</b> | WD repeat-containing protein 6.                                                                                                                                                                                                                                     | Go Component not found |
| <b>Q9GZT5</b> | Protein Wnt-10a precursor.                                                                                                                                                                                                                                          | Go Component not found |
| <b>Q93098</b> | Protein Wnt-8b precursor.                                                                                                                                                                                                                                           | Go Component not found |
| <b>Q15051</b> | IQ calmodulin-binding motif-containing protein 1 (Nephrocystin-5).                                                                                                                                                                                                  | Go Component not found |
| <b>Q14156</b> | Protein EFR3-like.                                                                                                                                                                                                                                                  | Go Component not found |
| <b>Q14687</b> | Genetic suppressor element 1.                                                                                                                                                                                                                                       | Go Component not found |
| <b>Q12768</b> | Strumpellin.                                                                                                                                                                                                                                                        | Go Component not found |
| <b>Q92618</b> | Zinc finger protein 516.                                                                                                                                                                                                                                            | Go Component not found |
| <b>Q92561</b> | [Phytanoyl-CoA hydroxylase-interacting protein (Phytanoyl-CoA, hydroxylase-associated protein 1) (PAHXAP1) (PAHX-AP1).]                                                                                                                                             | Go Component not found |
| <b>O15040</b> | Uncharacterized protein KIAA0329/KIAA0297.                                                                                                                                                                                                                          | Go Component not found |
| <b>O43313</b> | Uncharacterized protein KIAA0431.                                                                                                                                                                                                                                   | Go Component not found |
| <b>O60269</b> | G protein-regulated inducer of neurite outgrowth 2 (GRIN2).                                                                                                                                                                                                         | Go Component not found |
| <b>O94819</b> | [Kelch repeat and BTB domain-containing protein 11 (Kelch domain-, containing protein 7B).]                                                                                                                                                                         | Go Component not found |
| <b>O94933</b> | SLIT and NTRK-like protein 3 precursor.                                                                                                                                                                                                                             | Go Component not found |
| <b>Q9Y2K5</b> | R3H domain-containing protein 2.                                                                                                                                                                                                                                    | Go Component not found |



|               |                                                                                                                                                                                                                                                                      |                        |
|---------------|----------------------------------------------------------------------------------------------------------------------------------------------------------------------------------------------------------------------------------------------------------------------|------------------------|
| <b>Q9UPW6</b> | [DNA-binding protein SATB2 (Special AT-rich sequence-binding protein, 2).]                                                                                                                                                                                           | Go Component not found |
| <b>Q9P2Q2</b> | FERM domain-containing protein 4A.                                                                                                                                                                                                                                   | Go Component not found |
| <b>P52740</b> | Zinc finger protein 132.                                                                                                                                                                                                                                             | Go Component not found |
| <b>P52747</b> | Zinc finger protein 143 (SPH-binding factor).                                                                                                                                                                                                                        | Go Component not found |
| <b>Q9ULX5</b> | [Zinc finger protein 179 (Brain finger protein) (RING finger protein, 112).]                                                                                                                                                                                         | Go Component not found |
| <b>O14771</b> | [Zinc finger protein 213 (Putative transcription factor CR53) (Zinc, finger protein with KRAB and SCAN domains 21).]                                                                                                                                                 | Go Component not found |
| <b>Q9UK11</b> | Zinc finger protein 223.                                                                                                                                                                                                                                             | Go Component not found |
| <b>Q14588</b> | Zinc finger protein 234 (Zinc finger protein HZF4).                                                                                                                                                                                                                  | Go Component not found |
| <b>O43296</b> | Zinc finger protein 264.                                                                                                                                                                                                                                             | Go Component not found |
| <b>O94822</b> | Zinc finger protein 294 (RING finger protein 160).                                                                                                                                                                                                                   | Go Component not found |
| <b>O43716</b> | GatC-like protein (Protein 15E1.2).                                                                                                                                                                                                                                  | Go Component not found |
| <b>P28335</b> | [5-hydroxytryptamine 2C receptor (5-HT-2C) (Serotonin receptor 2C) (5-, HT2C) (5-HTR2C) (5HT-1C).]                                                                                                                                                                   | Go Component not found |
| <b>P13994</b> | Coiled-coil domain-containing protein 130 (9 kDa protein).                                                                                                                                                                                                           | Go Component not found |
| <b>P63010</b> | [AP-2 complex subunit beta-1 (Adapter-related protein complex 2 beta-1, subunit) (Beta-adaptin) (Plasma membrane adaptor HA2/AP2 adaptin beta, subunit) (Clathrin assembly protein complex 2 beta large chain), (AP105B).]                                           | Go Component not found |
| <b>Q96CW1</b> | [AP-2 complex subunit mu-1 (Adaptin mu-1) (AP-2 mu-2 chain) (Clathrin, coat assembly protein AP50) (Clathrin coat-associated protein AP50), (Plasma membrane adaptor AP-2 50 kDa protein) (HA2 50 kDa subunit), (Clathrin assembly protein complex 2 medium chain).] | Go Component not found |
| <b>P17174</b> | [Aspartate aminotransferase, cytoplasmic (EC 2.6.1.1) (Transaminase A), (Glutamate oxaloacetate transaminase 1).]                                                                                                                                                    | Go Component not found |
| <b>PO7108</b> | [Acyl-CoA-binding protein (ACBP) (Diazepam-binding inhibitor) (DBI), (Endozepine) (EP).]                                                                                                                                                                             | Go Component not found |
| <b>O14525</b> | Astrotactin-1 precursor.                                                                                                                                                                                                                                             | Go Component not found |
| <b>Q06278</b> | Aldehyde oxidase (EC 1.2.3.1).                                                                                                                                                                                                                                       | Go Component not found |
| <b>O43572</b> | [A kinase anchor protein 10, mitochondrial precursor (Protein kinase A-, anchoring protein 10) (PRKA10) (Dual specificity A kinase-anchoring, protein 2) (D-AKAP-2).]                                                                                                | Go Component not found |

|               |                                                                                                                                                                                                                                              |                        |
|---------------|----------------------------------------------------------------------------------------------------------------------------------------------------------------------------------------------------------------------------------------------|------------------------|
| <b>O75969</b> | [A-kinase anchor protein 3 (Protein kinase A-anchoring protein 3), (PRKA3) (A-kinase anchor protein 110 kDa) (AKAP 110) (Sperm oocyte-, binding protein) (Fibrousheathin-1) (Fibrousheathin I) (Fibrous sheath, protein of 95 kDa) (FSP95).] | Go Component not found |
| <b>P57078</b> | [Receptor-interacting serine/threonine-protein kinase 4 (EC 2.7.11.1), (Ankyrin repeat domain protein 3) (PKC-delta-interacting protein, kinase).]                                                                                           | Go Component not found |
| <b>P28039</b> | [Acyloxyacyl hydrolase precursor (EC 3.1.1.77) [Contains: Acyloxyacyl, hydrolase small subunit; Acyloxyacyl hydrolase large subunit].]                                                                                                       | Go Component not found |
| <b>Q15041</b> | [ARL-6-interacting protein 1 (ADP-ribosylation-like factor 6-, interacting protein 1) (Aip-1).]                                                                                                                                              | Go Component not found |
| <b>O75185</b> | [Calcium-transporting ATPase type 2C member 2 (EC 3.6.3.8) (ATPase, 2C2).]                                                                                                                                                                   | Go Component not found |
| <b>P17544</b> | [Cyclic AMP-dependent transcription factor ATF-7 (Activating, transcription factor 7) (Transcription factor ATF-A).]                                                                                                                         | Go Component not found |
| <b>Q13315</b> | [Serine-protein kinase ATM (EC 2.7.11.1) (Ataxia telangiectasia, mutated) (A-T, mutated).]                                                                                                                                                   | Go Component not found |
| <b>P17735</b> | [Tyrosine aminotransferase (EC 2.6.1.5) (L-tyrosine:2-oxoglutarate, aminotransferase) (TAT).]                                                                                                                                                | Go Component not found |
| <b>P48634</b> | Large proline-rich protein BAT2 (HLA-B-associated transcript 2).                                                                                                                                                                             | Go Component not found |
| <b>O75363</b> | [Breast carcinoma amplified sequence 1 (Novel amplified in breast, cancer 1) (Amplified and overexpressed in breast cancer).]                                                                                                                | Go Component not found |
| <b>Q14457</b> | [Beclin-1 (Coiled-coil myosin-like BCL2-interacting protein) (Protein, GT197).]                                                                                                                                                              | Go Component not found |
| <b>P08236</b> | Beta-glucuronidase precursor (EC 3.2.1.31) (Beta-G1).                                                                                                                                                                                        | Go Component not found |
| <b>Q13075</b> | [Baculoviral IAP repeat-containing protein 1 (Neuronal apoptosis, inhibitory protein).]                                                                                                                                                      | Go Component not found |
| <b>P55107</b> | [Bone morphogenetic protein 3b precursor (BMP-3b), (Growth/differentiation factor 10) (GDF-10) (Bone-inducing protein), (BIP).]                                                                                                              | Go Component not found |
| <b>P18075</b> | [Bone morphogenetic protein 7 precursor (BMP-7) (Osteogenic protein 1), (OP-1) (Eptotermin alfa).]                                                                                                                                           | Go Component not found |
| <b>Q9H583</b> | HEAT repeat-containing protein 1 (Protein BAP28).                                                                                                                                                                                            | Go Component not found |
| <b>P25440</b> | Bromodomain-containing protein 2 (Protein RING3) (O27.1.1).                                                                                                                                                                                  | Go Component not found |
| <b>Q99622</b> | Protein C10.                                                                                                                                                                                                                                 | Go Component not found |
| <b>Q13740</b> | CD166 antigen precursor (Activated leukocyte cell adhesion molecule).                                                                                                                                                                        | Go Component not found |
| <b>P29377</b> | [Protein S100-G (S100 calcium-binding protein G) (Vitamin D-dependent, calcium-binding protein, intestinal) (CABP) (Calbindin-D9k).]                                                                                                         | Go Component not found |
| <b>P05937</b> | [Calbindin (Vitamin D-dependent calcium-binding protein, avian-type), (Calbindin D28) (D-28K).]                                                                                                                                              | Go Component not found |

|               |                                                                                                                                                                                                                                            |                        |
|---------------|--------------------------------------------------------------------------------------------------------------------------------------------------------------------------------------------------------------------------------------------|------------------------|
| <b>P22223</b> | Cadherin-3 precursor (Placental-cadherin) (P-cadherin).                                                                                                                                                                                    | Go Component not found |
| <b>P55286</b> | Cadherin-8 precursor.                                                                                                                                                                                                                      | Go Component not found |
| <b>P00915</b> | [Carbonic anhydrase 1 (EC 4.2.1.1) (Carbonic anhydrase I) (Carbonate, dehydratase I) (CA-I).]                                                                                                                                              | Go Component not found |
| <b>P23280</b> | [Carbonic anhydrase 6 precursor (EC 4.2.1.1) (Carbonic anhydrase VI), (Carbonate dehydratase VI) (CA-VI) (Secreted carbonic anhydrase), (Salivary carbonic anhydrase).]                                                                    | Go Component not found |
| <b>P07384</b> | [Calpain-1 catalytic subunit (EC 3.4.22.52) (Calpain-1 large subunit), (Calcium-activated neutral proteinase 1) (CANP 1) (Calpain mu-type), (muCANP) (Micromolar-calpain).]                                                                | Go Component not found |
| <b>P04632</b> | [Calpain small subunit 1 (CSS1) (Calcium-dependent protease small, subunit 1) (Calcium-dependent protease small subunit) (CDPS) (Calpain, regulatory subunit) (Calcium-activated neutral proteinase small, subunit) (CANP small subunit).] | Go Component not found |
| <b>P40123</b> | Adenylyl cyclase-associated protein 2 (CAP 2).                                                                                                                                                                                             | Go Component not found |
| <b>P43234</b> | Cathepsin O precursor (EC 3.4.22.42).                                                                                                                                                                                                      | Go Component not found |
| <b>P06307</b> | [Cholecystokinins precursor (CCK) [Contains: Cholecystokinin 58, (CCK58); Cholecystokinin 39 (CCK39); Cholecystokinin 33 (CCK33);, Cholecystokinin 12 (CCK12); Cholecystokinin 8 (CCK8)].]                                                 | Go Component not found |
| <b>Q13319</b> | [Cyclin-dependent kinase 5 activator 2 precursor (CDK5 activator 2), (Cyclin-dependent kinase 5 regulatory subunit 2) (P39) (P39)].]                                                                                                       | Go Component not found |
| <b>Q15744</b> | CCAAT/enhancer-binding protein epsilon (C/EBP epsilon).                                                                                                                                                                                    | Go Component not found |
| <b>P00751</b> | [Complement factor B precursor (EC 3.4.21.47) (C3/C5 convertase), (Properdin factor B) (Glycine-rich beta glycoprotein) (GBG) (PBF2), [Contains: Complement factor B Ba fragment; Complement factor B Bb, fragment].]                      | Go Component not found |
| <b>P05156</b> | [Complement factor I precursor (EC 3.4.21.45) (C3B/C4B inactivator), [Contains: Complement factor I heavy chain; Complement factor I light, chain].]                                                                                       | Go Component not found |
| <b>Q13495</b> | Protein CG1 (F18).                                                                                                                                                                                                                         | Go Component not found |
| <b>Q16589</b> | Cyclin-G2.                                                                                                                                                                                                                                 | Go Component not found |
| <b>O14646</b> | [Chromodomain-helicase-DNA-binding protein 1 (EC 3.6.1.-) (ATP-, dependent helicase CHD1) (CHD-1).]                                                                                                                                        | Go Component not found |
| <b>Q14839</b> | [Chromodomain-helicase-DNA-binding protein 4 (EC 3.6.1.-) (ATP-, dependent helicase CHD4) (CHD-4) (Mi-2 autoantigen 218 kDa protein), (Mi2 beta).]                                                                                         | Go Component not found |
| <b>Q14524</b> | [Sodium channel protein type 5 subunit alpha (Sodium channel protein, type V subunit alpha) (Voltage-gated sodium channel subunit alpha, Nav1.5) (Sodium channel protein cardiac muscle subunit alpha) (HH1).]                             | Go Component not found |
| <b>Q9Y2U2</b> | Potassium channel subfamily K member 7.                                                                                                                                                                                                    | Go Component not found |
| <b>P22676</b> | Calretinin (CR) (29 kDa calbindin).                                                                                                                                                                                                        | Go Component not found |
| <b>P49759</b> | [Dual specificity protein kinase CLK1 (EC 2.7.12.1) (CDC-like kinase, 1).]                                                                                                                                                                 | Go Component not found |

|               |                                                                                                                                                                                                                                                                                                                                   |                        |
|---------------|-----------------------------------------------------------------------------------------------------------------------------------------------------------------------------------------------------------------------------------------------------------------------------------------------------------------------------------|------------------------|
| <b>P10645</b> | [Chromogranin-A precursor (CgA) (Pituitary secretory protein I) (SP-I), [Contains: Vasostatin-1 (Vasostatin I); Vasostatin-2 (Vasostatin II);, EA-92; ES-43; Pancreastatin; SS-18; WA-8; WE-14; LF-19; AL-11; GV-19; GR-44; ER-37].]                                                                                              | Go Component not found |
| <b>O00408</b> | [cGMP-dependent 3',5'-cyclic phosphodiesterase (EC 3.1.4.17) (Cyclic, GMP-stimulated phosphodiesterase) (CGS-PDE) (cGSPDE).]                                                                                                                                                                                                      | Go Component not found |
| <b>Q13370</b> | [cGMP-inhibited 3',5'-cyclic phosphodiesterase B (EC 3.1.4.17) (Cyclic, GMP-inhibited phosphodiesterase B) (CGI-PDE B) (CGIPDE1) (CGIP1).]                                                                                                                                                                                        | Go Component not found |
| <b>O76074</b> | [cGMP-specific 3',5'-cyclic phosphodiesterase (EC 3.1.4.35) (CGB-PDE), (cGMP-binding cGMP-specific phosphodiesterase).]                                                                                                                                                                                                           | Go Component not found |
| <b>P01024</b> | [Complement C3 precursor [Contains: Complement C3 beta chain; Complement C3 alpha chain; C3a anaphylatoxin; Complement C3b alpha' chain; Complement C3c alpha' chain fragment 1; Complement C3dg, fragment; Complement C3g fragment; Complement C3d fragment; Complement, C3f fragment; Complement C3c alpha' chain fragment 2].] | Go Component not found |
| <b>Q9Y281</b> | Cofilin-2 (Cofilin, muscle isoform).                                                                                                                                                                                                                                                                                              | Go Component not found |
| <b>P14406</b> | [Cytochrome c oxidase polypeptide VIIa-liver/heart, mitochondrial, precursor (EC 1.9.3.1) (Cytochrome c oxidase subunit VIIa-L) (VIIaL).]                                                                                                                                                                                         | Go Component not found |
| <b>O75881</b> | [Cytochrome P450 7B1 (EC 1.14.13.100) (25-hydroxycholesterol 7-alpha-, hydroxylase) (Oxysterol 7-alpha-hydroxylase).]                                                                                                                                                                                                             | Go Component not found |
| <b>P33260</b> | Cytochrome P450 2C18 (EC 1.14.14.1) (CYPIIC18) (P450-6B/29C).                                                                                                                                                                                                                                                                     | Go Component not found |
| <b>P05181</b> | Cytochrome P450 2E1 (EC 1.14.14.1) (CYPIIE1) (P450-J).                                                                                                                                                                                                                                                                            | Go Component not found |
| <b>P05813</b> | [Beta-crystallin A3 [Contains: Beta-crystallin A3, isoform A1, Delta4, form; Beta-crystallin A3, isoform A1, Delta7 form; Beta-crystallin A3,, isoform A1, Delta8 form].]                                                                                                                                                         | Go Component not found |
| <b>P22914</b> | Beta-crystallin S (Gamma-crystallin S) (Gamma-S crystallin).                                                                                                                                                                                                                                                                      | Go Component not found |
| <b>P07320</b> | Gamma-crystallin D (Gamma-D crystallin) (Gamma-crystallin 4).                                                                                                                                                                                                                                                                     | Go Component not found |
| <b>P52943</b> | Cysteine-rich protein 2 (CRP2) (Protein ESP1).                                                                                                                                                                                                                                                                                    | Go Component not found |
| <b>Q13618</b> | Cullin-3 (CUL-3).                                                                                                                                                                                                                                                                                                                 | Go Component not found |
| <b>P58304</b> | Homeobox protein CHX10 (Ceh-10 homeodomain-containing homolog).                                                                                                                                                                                                                                                                   | Go Component not found |
| <b>O43306</b> | [Adenylate cyclase type 6 (EC 4.6.1.1) (Adenylate cyclase type VI) (ATP, pyrophosphate-lyase 6) (Adenylyl cyclase 6) (Ca(2+)-inhibitable, adenylyl cyclase).]                                                                                                                                                                     | Go Component not found |
| <b>O75909</b> | Cyclin-K.                                                                                                                                                                                                                                                                                                                         | Go Component not found |
| <b>P62941</b> | [Peptidyl-prolyl cis-trans isomerase A (EC 5.2.1.8) (PPIase A), (Rotamase A) (Cyclophilin A) (Cyclosporin A-binding protein).]                                                                                                                                                                                                    | Go Component not found |
| <b>P01034</b> | [Cystatin-C precursor (Cystatin-3) (Neuroendocrine basic polypeptide), (Gamma-trace) (Post-gamma-globulin).]                                                                                                                                                                                                                      | Go Component not found |

|               |                                                                                                                                                                                                                                                                                                                                                 |                        |
|---------------|-------------------------------------------------------------------------------------------------------------------------------------------------------------------------------------------------------------------------------------------------------------------------------------------------------------------------------------------------|------------------------|
| <b>Q92499</b> | [ATP-dependent RNA helicase DDX1 (EC 3.6.1.-) (DEAD box protein 1), (DEAD box protein retinoblastoma) (DBP-RB).]                                                                                                                                                                                                                                | Go Component not found |
| <b>Q07507</b> | Dermatopontin precursor (Tyrosine-rich acidic matrix protein) (TRAMP).                                                                                                                                                                                                                                                                          | Go Component not found |
| <b>O60443</b> | [Non-syndromic hearing impairment protein 5 (Inversely correlated with, estrogen receptor expression 1) (ICERE-1).]                                                                                                                                                                                                                             | Go Component not found |
| <b>O94788</b> | [Retinal dehydrogenase 2 (EC 1.2.1.36) (RalDH2) (RALDH 2) (RALDH(II)), (Retinaldehyde-specific dehydrogenase type 2) (Aldehyde dehydrogenase, family 1 member A2).]                                                                                                                                                                             | Go Component not found |
| <b>P49448</b> | Glutamate dehydrogenase 2, mitochondrial precursor (EC 1.4.1.3) (GDH).                                                                                                                                                                                                                                                                          | Go Component not found |
| <b>Q00796</b> | Sorbitol dehydrogenase (EC 1.1.1.14) (L-iditol 2-dehydrogenase).                                                                                                                                                                                                                                                                                | Go Component not found |
| <b>Q9UBT3</b> | [Dickkopf-related protein 4 precursor (Dkk-4) (Dickkopf-4) (hDkk-4), [Contains: Dickkopf-related protein 4 short form].]                                                                                                                                                                                                                        | Go Component not found |
| <b>Q9Y5R6</b> | [Doublesex- and mab-3-related transcription factor 1 (DM domain, expressed in testis protein 1).]                                                                                                                                                                                                                                               | Go Component not found |
| <b>P56282</b> | [DNA polymerase epsilon subunit 2 (EC 2.7.7.7) (DNA polymerase II, subunit 2) (DNA polymerase epsilon subunit B).]                                                                                                                                                                                                                              | Go Component not found |
| <b>P27487</b> | [Dipeptidyl peptidase 4 (EC 3.4.14.5) (Dipeptidyl peptidase IV) (DPP, IV) (T-cell activation antigen CD26) (TP103) (Adenosine deaminase, complexing protein 2) (ADABP) [Contains: Dipeptidyl peptidase 4, membrane form (Dipeptidyl peptidase IV membrane form); Dipeptidyl, peptidase 4 soluble form (Dipeptidyl peptidase IV soluble form)].] | Go Component not found |
| <b>P56555</b> | [Down syndrome critical region protein 4 (Down syndrome critical region, protein B).]                                                                                                                                                                                                                                                           | Go Component not found |
| <b>P28324</b> | [ETS domain-containing protein Elk-4 (Serum response factor accessory, protein 1) (SAP-1).]                                                                                                                                                                                                                                                     | Go Component not found |
| <b>P09104</b> | [Gamma-enolase (EC 4.2.1.11) (2-phospho-D-glycerate hydro-lyase), (Neural enolase) (Neuron-specific enolase) (NSE) (Enolase 2).]                                                                                                                                                                                                                | Go Component not found |
| <b>P61550</b> | [HERV-T_19q13.11 provirus ancestral Env polyprotein precursor (Envelope, polyprotein) (HERV-T Env protein) [Includes: Surface protein (SU);, Transmembrane protein (TM)].]                                                                                                                                                                      | Go Component not found |
| <b>O15197</b> | [Ephrin type-B receptor 6 precursor (Tyrosine-protein kinase-defective, receptor EPH-6) (HEP).]                                                                                                                                                                                                                                                 | Go Component not found |
| <b>O95718</b> | [Steroid hormone receptor ERR2 (Estrogen-related receptor, beta) (ERR-, beta) (Estrogen receptor-like 2) (ERR beta-2).]                                                                                                                                                                                                                         | Go Component not found |
| <b>P22794</b> | [EVI2A protein precursor (Ecotropic viral integration site 2A protein, homolog) (EVI-2A).]                                                                                                                                                                                                                                                      | Go Component not found |
| <b>Q16875</b> | [6-phosphofructo-2-kinase/fructose-2,6-biphosphatase 3 (6PF-2-K/Fru-, 2,6-P2ASE brain/placenta-type isozyme) (iPFK-2) (Renal carcinoma, antigen NY-REN-56) [Includes: 6-phosphofructo-2-kinase (EC 2.7.1.105);, Fructose-2,6-bisphosphatase (EC 3.1.3.46)].]                                                                                    | Go Component not found |
| <b>P49913</b> | [Cathelicidin antimicrobial peptide precursor (18 kDa cationic, antimicrobial protein) (CAP-18) (hCAP-18) [Contains: Antibacterial, protein FALL-39 (FALL-39 peptide antibiotic); Antibacterial protein, LL-37].]                                                                                                                               | Go Component not found |
| <b>Q9UKT8</b> | [F-box/WD repeat-containing protein 2 (F-box and WD-40 domain-, containing protein 2) (Protein MD6).]                                                                                                                                                                                                                                           | Go Component not found |

|               |                                                                                                                                                                                                                                              |                        |
|---------------|----------------------------------------------------------------------------------------------------------------------------------------------------------------------------------------------------------------------------------------------|------------------------|
| <b>P02771</b> | [Alpha-fetoprotein precursor (Alpha-fetoglobulin) (Alpha-1-, fetoprotein).]                                                                                                                                                                  | Go Component not found |
| <b>Q9POK8</b> | Forkhead box protein J2 (Fork head homologous X).                                                                                                                                                                                            | Go Component not found |
| <b>P06744</b> | [Glucose-6-phosphate isomerase (EC 5.3.1.9) (GPI) (Phosphoglucose, isomerase) (PGI) (Phosphohexose isomerase) (PHI) (Neuroleukin) (NLK), (Sperm antigen 36) (SA-36).]                                                                        | Go Component not found |
| <b>Q03113</b> | Guanine nucleotide-binding protein alpha-12 subunit (G alpha-12).                                                                                                                                                                            | Go Component not found |
| <b>P32455</b> | [Interferon-induced guanylate-binding protein 1 (GTP-binding protein 1), (Guanine nucleotide-binding protein 1) (GBP-1) (HuGBP-1).]                                                                                                          | Go Component not found |
| <b>P52951</b> | [Homeobox protein GBX-2 (Gastrulation and brain-specific homeobox, protein 2).]                                                                                                                                                              | Go Component not found |
| <b>P43080</b> | [Guanylyl cyclase-activating protein 1 (GCAP 1) (Guanylate cyclase, activator 1A).]                                                                                                                                                          | Go Component not found |
| <b>P36915</b> | Guanine nucleotide-binding protein-like 1 (GTP-binding protein HSR1).                                                                                                                                                                        | Go Component not found |
| <b>P43304</b> | [Glycerol-3-phosphate dehydrogenase, mitochondrial precursor, (EC 1.1.99.5) (GPD-M) (GPDH-M) (mtGPD).]                                                                                                                                       | Go Component not found |
| <b>Q14449</b> | Growth factor receptor-bound protein 14 (GRB14 adapter protein).                                                                                                                                                                             | Go Component not found |
| <b>O14653</b> | [Golgi SNAP receptor complex member 2 (27 kDa Golgi SNARE protein), (Membrin).]                                                                                                                                                              | Go Component not found |
| <b>P07203</b> | [Glutathione peroxidase 1 (EC 1.11.1.9) (GSHPx-1) (GPx-1) (Cellular, glutathione peroxidase).]                                                                                                                                               | Go Component not found |
| <b>P11169</b> | [Solute carrier family 2, facilitated glucose transporter member 3, (Glucose transporter type 3, brain) (GLUT-3).]                                                                                                                           | Go Component not found |
| <b>P49915</b> | [GMP synthase [glutamine-hydrolyzing] (EC 6.3.5.2) (Glutamine, amidotransferase) (GMP synthetase).]                                                                                                                                          | Go Component not found |
| <b>P98176</b> | Histone H2A-Bbd (H2A Barr body-deficient) (H2A.Bbd).                                                                                                                                                                                         | Go Component not found |
| <b>P01916</b> | HLA class II histocompatibility antigen, SB beta chain (Fragment).                                                                                                                                                                           | Go Component not found |
| <b>P69892</b> | [Hemoglobin subunit gamma-2 (Hemoglobin gamma-2 chain) (Gamma-2-globin), (Hemoglobin gamma-G chain) (Hb F Ggamma).]                                                                                                                          | Go Component not found |
| <b>P26927</b> | [Hepatocyte growth factor-like protein precursor (Macrophage, stimulatory protein) (MSP) (Macrophage-stimulating protein) [Contains: Hepatocyte growth factor-like protein alpha chain; Hepatocyte growth, factor-like protein beta chain].] | Go Component not found |
| <b>P17693</b> | [HLA class I histocompatibility antigen, alpha chain G precursor (HLA G, antigen).]                                                                                                                                                          | Go Component not found |
| <b>Q03014</b> | [Homeobox protein PRH (Hematopoietically-expressed homeobox) (Homeobox, protein HEX).]                                                                                                                                                       | Go Component not found |
| <b>Q13442</b> | [28 kDa heat- and acid-stable phosphoprotein (PDGF-associated protein), (PAP) (PDGFA-associated protein 1) (PAP1).]                                                                                                                          | Go Component not found |

|               |                                                                                                                                                                                    |                        |
|---------------|------------------------------------------------------------------------------------------------------------------------------------------------------------------------------------|------------------------|
| <b>P83110</b> | [Probable serine protease HTRA3 precursor (EC 3.4.21.-) (High-, temperature requirement factor A3) (Pregnancy-related serine, protease).]                                          | Go Component not found |
| <b>P17066</b> | Heat shock 70 kDa protein 6 (Heat shock 70 kDa protein B').                                                                                                                        | Go Component not found |
| <b>O14558</b> | [Heat shock protein beta-6 (HspB6) (Heat shock 20 kDa-like protein, p20).]                                                                                                         | Go Component not found |
| <b>P57058</b> | [Hormonally up-regulated neu tumor-associated kinase (EC 2.7.11.1), (Serine/threonine-protein kinase MAK-V) (B19).]                                                                | Go Component not found |
| <b>P31267</b> | Homeobox protein Hox-A6 (Hox-1B).                                                                                                                                                  | Go Component not found |
| <b>P14651</b> | Homeobox protein Hox-B3 (Hox-2G) (Hox-2.7).                                                                                                                                        | Go Component not found |
| <b>Q9NYD6</b> | Homeobox protein Hox-C10.                                                                                                                                                          | Go Component not found |
| <b>P22692</b> | [Insulin-like growth factor-binding protein 4 precursor (IGFBP-4) (IBP-, 4) (IGF-binding protein 4).]                                                                              | Go Component not found |
| <b>P20810</b> | Calpastatin (Calpain inhibitor) (Sperm BS-17 component).                                                                                                                           | Go Component not found |
| <b>P27352</b> | Gastric intrinsic factor precursor (Intrinsic factor) (IF) (INF).                                                                                                                  | Go Component not found |
| <b>Q12894</b> | Interferon-related developmental regulator 2 (SKMC15 protein).                                                                                                                     | Go Component not found |
| <b>P05019</b> | [Insulin-like growth factor IB precursor (IGF-IB) (Somatomedin C), (Mechano growth factor) (MGF).]                                                                                 | Go Component not found |
| <b>P58166</b> | Inhibin beta E chain precursor (Activin beta-E chain).                                                                                                                             | Go Component not found |
| <b>P16871</b> | [Interleukin-7 receptor alpha chain precursor (IL-7R-alpha) (CD127, antigen) (CDw127).]                                                                                            | Go Component not found |
| <b>O15225</b> | Putative inactivation escape 1 protein.                                                                                                                                            | Go Component not found |
| <b>Q9C010</b> | cAMP-dependent protein kinase inhibitor beta (PKI-beta).                                                                                                                           | Go Component not found |
| <b>P41236</b> | Protein phosphatase inhibitor 2 (IPP-2).                                                                                                                                           | Go Component not found |
| <b>Q14500</b> | [ATP-sensitive inward rectifier potassium channel 12 (Potassium, channel, inwardly rectifying subfamily J member 12) (Inward rectifier, K(+)<br>channel Kir2.2) (Kir2.2v) (IRK2).] | Go Component not found |
| <b>Q9BZ11</b> | [Iroquois-class homeodomain protein IRX-2 (Iroquois homeobox protein 2), (Homeodomain protein IRXA2).]                                                                             | Go Component not found |
| <b>P13612</b> | [Integrin alpha-4 precursor (Integrin alpha-IV) (VLA-4) (CD49d, antigen).]                                                                                                         | Go Component not found |
| <b>O60674</b> | Tyrosine-protein kinase JAK2 (EC 2.7.10.2) (Janus kinase 2) (JAK-2).                                                                                                               | Go Component not found |

|               |                                                                                                                                                                                                                                                                                     |                        |
|---------------|-------------------------------------------------------------------------------------------------------------------------------------------------------------------------------------------------------------------------------------------------------------------------------------|------------------------|
| <b>Q14525</b> | Keratin, type I cuticular Ha3-II (Hair keratin, type I Ha3-II).                                                                                                                                                                                                                     | Go Component not found |
| <b>Q9UBSO</b> | [Ribosomal protein S6 kinase beta-2 (EC 2.7.11.1) (S6K2) (70 kDa, ribosomal protein S6 kinase 2) (p70-S6KB) (p70 ribosomal S6 kinase, beta) (p70 S6Kbeta) (p70 S6 kinase beta) (S6K-beta) (p70-beta) (S6, kinase-related kinase) (SRK) (Serine/threonine-protein kinase 14, beta).] | Go Component not found |
| <b>P29622</b> | [Kallistatin precursor (Serp1n A4) (Kallikrein inhibitor) (Protease, inhibitor 4).]                                                                                                                                                                                                 | Go Component not found |
| <b>P31323</b> | cAMP-dependent protein kinase type II-beta regulatory subunit.                                                                                                                                                                                                                      | Go Component not found |
| <b>Q14012</b> | [Calcium/calmodulin-dependent protein kinase type 1 (EC 2.7.11.17) (CaM, kinase I) (CaM-KI) (CaM kinase I alpha) (CaMKI-alpha).]                                                                                                                                                    | Go Component not found |
| <b>Q9UGI6</b> | [Small conductance calcium-activated potassium channel protein 3 (SK3), (SKCa3).]                                                                                                                                                                                                   | Go Component not found |
| <b>Q9Y6T7</b> | [Diacylglycerol kinase beta (EC 2.7.1.107) (Diglyceride kinase beta), (DGK-beta) (DAG kinase beta) (90 kDa diacylglycerol kinase).]                                                                                                                                                 | Go Component not found |
| <b>P46013</b> | Antigen KI-67.                                                                                                                                                                                                                                                                      | Go Component not found |
| <b>Q93100</b> | [Phosphorylase b kinase regulatory subunit beta (Phosphorylase kinase, subunit beta).]                                                                                                                                                                                              | Go Component not found |
| <b>O60662</b> | [Kelch repeat and BTB domain-containing protein 10 (Kelch-related, protein 1) (Kel-like protein 23) (Sarcosin).]                                                                                                                                                                    | Go Component not found |
| <b>P52954</b> | Transcription factor LBX1 (Ladybird homeobox protein homolog 1).                                                                                                                                                                                                                    | Go Component not found |
| <b>O15270</b> | [Serine palmitoyltransferase 2 (EC 2.3.1.50) (Long chain base, biosynthesis protein 2) (LCB 2) (Serine-palmitoyl-CoA transferase 2), (SPT 2).]                                                                                                                                      | Go Component not found |
| <b>Q9ULC5</b> | [Long-chain-fatty-acid--CoA ligase 5 (EC 6.2.1.3) (Long-chain acyl-CoA, synthetase 5) (LACS 5).]                                                                                                                                                                                    | Go Component not found |
| <b>O43900</b> | LIM domain only protein 6 (Triple LIM domain protein 6).                                                                                                                                                                                                                            | Go Component not found |
| <b>P16050</b> | [Arachidonate 15-lipoxygenase (EC 1.13.11.33) (Arachidonate omega-6, lipoxygenase) (15-LOX).]                                                                                                                                                                                       | Go Component not found |
| <b>Q16706</b> | [Alpha-mannosidase 2 (EC 3.2.1.114) (Alpha-mannosidase II) (Mannosyl-, oligosaccharide 1,3-1,6-alpha-mannosidase) (MAN II) (Golgi alpha-, mannosidase II) (Mannosidase alpha class 2A member 1).]                                                                                   | Go Component not found |
| <b>Q9Y2E5</b> | [Epididymis-specific alpha-mannosidase precursor (EC 3.2.1.24), (Mannosidase alpha class 2B member 2).]                                                                                                                                                                             | Go Component not found |
| <b>Q9Y6R4</b> | [Mitogen-activated protein kinase kinase kinase 4 (EC 2.7.11.25), (MAPK/ERK kinase kinase 4) (MEK kinase 4) (MEKK 4) (MAP three kinase, 1).]                                                                                                                                        | Go Component not found |
| <b>P80192</b> | [Mitogen-activated protein kinase kinase kinase 9 (EC 2.7.11.25) (Mixed, lineage kinase 1).]                                                                                                                                                                                        | Go Component not found |
| <b>P20916</b> | Myelin-associated glycoprotein precursor (Siglec-4a).                                                                                                                                                                                                                               | Go Component not found |



|               |                                                                                                                                                                                                                                            |                        |
|---------------|--------------------------------------------------------------------------------------------------------------------------------------------------------------------------------------------------------------------------------------------|------------------------|
| <b>P43365</b> | Melanoma-associated antigen 12 (MAGE-12 antigen) (MAGE12F).                                                                                                                                                                                | Go Component not found |
| <b>P34949</b> | [Mannose-6-phosphate isomerase (EC 5.3.1.8) (Phosphomannose isomerase), (PMI) (Phosphohexomutase).]                                                                                                                                        | Go Component not found |
| <b>P23368</b> | [NAD-dependent malic enzyme, mitochondrial precursor (EC 1.1.1.38), (NAD-ME) (Malic enzyme 2).]                                                                                                                                            | Go Component not found |
| <b>P36952</b> | Serpin B5 precursor (Maspin) (Protease inhibitor 5).                                                                                                                                                                                       | Go Component not found |
| <b>P02686</b> | [Myelin basic protein (MBP) (Myelin A1 protein) (Myelin membrane, encephalitogenic protein).]                                                                                                                                              | Go Component not found |
| <b>Q06413</b> | Myocyte-specific enhancer factor 2C.                                                                                                                                                                                                       | Go Component not found |
| <b>P52888</b> | Thimet oligopeptidase (EC 3.4.24.15) (Endopeptidase 24.15) (MP78).                                                                                                                                                                         | Go Component not found |
| <b>P43366</b> | [Melanoma-associated antigen B1 (MAGE-B1 antigen) (MAGE-XP antigen), (DSS-AHC critical interval MAGE superfamily 10) (DAM10).]                                                                                                             | Go Component not found |
| <b>P60602</b> | Protein MGR2 homolog.                                                                                                                                                                                                                      | Go Component not found |
| <b>P27361</b> | [Mitogen-activated protein kinase 3 (EC 2.7.11.24) (Extracellular, signal-regulated kinase 1) (ERK-1) (Insulin-stimulated MAP2 kinase), (MAP kinase 1) (MAPK 1) (p44-ERK1) (ERT2) (p44-MAPK) (Microtubule-, associated protein 2 kinase).] | Go Component not found |
| <b>O15234</b> | [Protein CASC3 (Cancer susceptibility candidate gene 3 protein), (Metastatic lymph node protein 51) (Protein MLN 51) (Protein barentsz), (Btz).]                                                                                           | Go Component not found |
| <b>Q10571</b> | Probable tumor suppressor protein MN1.                                                                                                                                                                                                     | Go Component not found |
| <b>P50222</b> | [Homeobox protein MOX-2 (Mesenchyme homeobox 2) (Growth arrest-specific, homeobox).]                                                                                                                                                       | Go Component not found |
| <b>P47224</b> | Guanine nucleotide exchange factor MSS4 (Rab-interacting factor).                                                                                                                                                                          | Go Component not found |
| <b>Q13496</b> | Myotubularin (EC 3.1.3.48).                                                                                                                                                                                                                | Go Component not found |
| <b>Q9Y2Z2</b> | Protein MTO1 homolog, mitochondrial precursor.                                                                                                                                                                                             | Go Component not found |
| <b>O43795</b> | Myosin-Ib (Myosin I alpha) (MMI-alpha) (MMIa) (MYH-1c).                                                                                                                                                                                    | Go Component not found |
| <b>Q9NQX4</b> | Myosin-Vc.                                                                                                                                                                                                                                 | Go Component not found |
| <b>P57103</b> | [Sodium/calcium exchanger 3 precursor (Na <sup>+</sup> )/Ca <sup>2+</sup> -exchange protein, 3).]                                                                                                                                          | Go Component not found |
| <b>O75376</b> | Nuclear receptor corepressor 1 (N-CoR1) (N-CoR).                                                                                                                                                                                           | Go Component not found |
| <b>Q92597</b> | [Protein NDRG1 (N-myc downstream-regulated gene 1 protein), (Differentiation-related gene 1 protein) (DRG-1) (Reducing agents and, tunicamycin-responsive protein) (RTP) (Nickel-specific induction, protein Cap43) (Rit42).]              | Go Component not found |

|               |                                                                                                                                                                                                                                |                        |
|---------------|--------------------------------------------------------------------------------------------------------------------------------------------------------------------------------------------------------------------------------|------------------------|
| <b>Q99574</b> | Neuroserpin precursor (Serp11) (Protease inhibitor 12).                                                                                                                                                                        | Go Component not found |
| <b>Q15818</b> | Neuronal pentraxin-1 precursor (NP1) (Neuronal pentraxin I) (NP-I).                                                                                                                                                            | Go Component not found |
| <b>Q16656</b> | [Nuclear respiratory factor 1 (NRF-1) (Alpha palindromic-binding, protein) (Alpha-pal).]                                                                                                                                       | Go Component not found |
| <b>Q9Y5Y2</b> | Nucleotide-binding protein 2 (NBP 2).                                                                                                                                                                                          | Go Component not found |
| <b>O43869</b> | [Olfactory receptor 2T1 (Olfactory receptor OR1-61) (Olfactory receptor, 1-25) (OR1-25).]                                                                                                                                      | Go Component not found |
| <b>Q9GZM6</b> | Olfactory receptor 8D2 (Olfactory receptor-like protein JCG2).                                                                                                                                                                 | Go Component not found |
| <b>P56715</b> | [Oxygen-regulated protein 1 (Retinitis pigmentosa RP1 protein), (Retinitis pigmentosa 1 protein).]                                                                                                                             | Go Component not found |
| <b>P42336</b> | [Phosphatidylinositol-4,5-bisphosphate 3-kinase catalytic subunit alpha, isoform (EC 2.7.1.153) (PI3-kinase p110 subunit alpha) (PtdIns-3-, kinase p110) (PI3K).]                                                              | Go Component not found |
| <b>O15350</b> | [Tumor protein p73 (p53-like transcription factor) (p53-related, protein).]                                                                                                                                                    | Go Component not found |
| <b>P05120</b> | [Plasminogen activator inhibitor 2 precursor (PAI-2) (Placental, plasminogen activator inhibitor) (Monocyte Arg-serpin) (Urokinase, inhibitor).]                                                                               | Go Component not found |
| <b>P23760</b> | Paired box protein Pax-3 (HUP2).                                                                                                                                                                                               | Go Component not found |
| <b>P57723</b> | Poly(rC)-binding protein 4 (Alpha-CP4).                                                                                                                                                                                        | Go Component not found |
| <b>Q9Y6G1</b> | Transmembrane protein 14A.                                                                                                                                                                                                     | Go Component not found |
| <b>Q9ULW8</b> | [Protein-arginine deiminase type-3 (EC 3.5.3.15) (Protein-arginine, deiminase type III) (Peptidylarginine deiminase III).]                                                                                                     | Go Component not found |
| <b>P30048</b> | [Thioredoxin-dependent peroxide reductase, mitochondrial precursor, (EC 1.11.1.15) (Peroxiredoxin-3) (PRX III) (Antioxidant protein 1), (AOP-1) (Protein MER5 homolog) (HBC189).]                                              | Go Component not found |
| <b>P30086</b> | [Phosphatidylethanolamine-binding protein 1 (PEBP-1) (Prostatic-binding, protein) (HCNPPp) (Neuropolypeptide h3) (Raf kinase inhibitor protein), (RKIP) [Contains: Hippocampal cholinergic neurostimulating peptide, (HCNP)].] | Go Component not found |
| <b>P01210</b> | [Proenkephalin A precursor [Contains: Synenkephalin; Met-enkephalin, (Opioid growth factor) (OGF); Met-enkephalin-Arg-Gly-Leu; Leu-, enkephalin; Met-enkephalin-Arg-Phe].]                                                     | Go Component not found |
| <b>P28328</b> | [Peroxisome assembly factor 1 (PAF-1) (Peroxin-2) (Peroxisomal membrane, protein 3) (35 kDa peroxisomal membrane protein) (RING finger protein, 72).]                                                                          | Go Component not found |
| <b>P80108</b> | [Phosphatidylinositol-glycan-specific phospholipase D precursor, (EC 3.1.4.50) (PI-G PLD) (Glycoprotein phospholipase D) (Glycosyl-, phosphatidylinositol-specific phospholipase D).]                                          | Go Component not found |
| <b>Q15147</b> | [1-phosphatidylinositol-4,5-bisphosphate phosphodiesterase beta 4, (EC 3.1.4.11) (Phosphoinositide phospholipase C) (Phospholipase C-, beta-4) (PLC-beta-4).]                                                                  | Go Component not found |
| <b>P16885</b> | [1-phosphatidylinositol-4,5-bisphosphate phosphodiesterase gamma 2, (EC 3.1.4.11) (Phosphoinositide phospholipase C) (PLC-gamma-2), (Phospholipase C-gamma-2) (PLC-IV).]                                                       | Go Component not found |

|               |                                                                                                                                                                                                                                  |                        |
|---------------|----------------------------------------------------------------------------------------------------------------------------------------------------------------------------------------------------------------------------------|------------------------|
| <b>Q14155</b> | [Rho guanine nucleotide exchange factor 7 (PAK-interacting exchange, factor beta) (Beta-Pix) (COOL-1) (p85).]                                                                                                                    | Go Component not found |
| <b>P51817</b> | [Serine/threonine-protein kinase PRKX (EC 2.7.11.1) (Protein kinase, PKX1).]                                                                                                                                                     | Go Component not found |
| <b>Q14651</b> | Plastin-1 (I-plastin) (Intestine-specific plastin).                                                                                                                                                                              | Go Component not found |
| <b>P11086</b> | [Phenylethanolamine N-methyltransferase (EC 2.1.1.28) (PNMTase), (Noradrenaline N-methyltransferase).]                                                                                                                           | Go Component not found |
| <b>P35558</b> | [Phosphoenolpyruvate carboxykinase, cytosolic [GTP] (EC 4.1.1.32), (Phosphoenolpyruvate carboxylase) (PEPCK-C).]                                                                                                                 | Go Component not found |
| <b>Q00169</b> | [Phosphatidylinositol transfer protein alpha isoform (PtdIns transfer, protein alpha) (PtdInsTP) (PI-TP-alpha).]                                                                                                                 | Go Component not found |
| <b>Q9UKN5</b> | PR domain zinc finger protein 4 (PR domain-containing protein 4).                                                                                                                                                                | Go Component not found |
| <b>P78527</b> | [DNA-dependent protein kinase catalytic subunit (EC 2.7.11.1) (DNA-PK, catalytic subunit) (DNA-PKcs) (DNPK1) (p460).]                                                                                                            | Go Component not found |
| <b>P24158</b> | [Myeloblastin precursor (EC 3.4.21.76) (Leukocyte proteinase 3) (PR-3), (PR3) (AGP7) (Wegener autoantigen) (P29) (C-ANCA antigen) (Neutrophil, proteinase 4) (NP-4).]                                                            | Go Component not found |
| <b>P81277</b> | [Prolactin-releasing peptide precursor (PrRP) (Prolactin-releasing, hormone) [Contains: Prolactin-releasing peptide PrRP31; Prolactin-, releasing peptide PrRP20].]                                                              | Go Component not found |
| <b>Q13882</b> | [Tyrosine-protein kinase 6 (EC 2.7.10.2) (Breast tumor kinase), (Tyrosine-protein kinase BRK).]                                                                                                                                  | Go Component not found |
| <b>Q06124</b> | [Tyrosine-protein phosphatase non-receptor type 11 (EC 3.1.3.48), (Protein-tyrosine phosphatase 2C) (PTP-2C) (PTP-1D) (SH-PTP3) (SH-, PTP2) (SHP-2) (Shp2).]                                                                     | Go Component not found |
| <b>Q12923</b> | [Tyrosine-protein phosphatase non-receptor type 13 (EC 3.1.3.48), (Protein-tyrosine phosphatase 1E) (PTP-E1) (hPTPE1) (PTP-BAS), (Protein-tyrosine phosphatase PTPL1) (Fas-associated protein-tyrosine, phosphatase 1) (FAP-1).] | Go Component not found |
| <b>Q06203</b> | [Amidophosphoribosyltransferase precursor (EC 2.4.2.14) (Glutamine, phosphoribosylpyrophosphate amidotransferase) (ATase) (GPAT).]                                                                                               | Go Component not found |
| <b>P11498</b> | [Pyruvate carboxylase, mitochondrial precursor (EC 6.4.1.1) (Pyruvic, carboxylase) (PCB).]                                                                                                                                       | Go Component not found |
| <b>P17812</b> | [CTP synthase 1 (EC 6.3.4.2) (UTP--ammonia ligase 1) (CTP synthetase, 1).]                                                                                                                                                       | Go Component not found |
| <b>Q16769</b> | [Glutaminy-peptide cyclotransferase precursor (EC 2.3.2.5) (QC), (Glutaminyl-tRNA cyclotransferase) (Glutaminy cyclase) (Glutamyl, cyclase) (EC).]                                                                               | Go Component not found |
| <b>Q9Y5P3</b> | Retinoic acid-induced protein 2.                                                                                                                                                                                                 | Go Component not found |
| <b>P51157</b> | Ras-related protein Rab-28 (Rab-26).                                                                                                                                                                                             | Go Component not found |
| <b>P20338</b> | Ras-related protein Rab-4A.                                                                                                                                                                                                      | Go Component not found |
| <b>Q08999</b> | [Retinoblastoma-like protein 2 (130 kDa retinoblastoma-associated, protein) (PRB2) (P130) (RBR-2).]                                                                                                                              | Go Component not found |

|               |                                                                                                                                                        |                        |
|---------------|--------------------------------------------------------------------------------------------------------------------------------------------------------|------------------------|
| <b>P35243</b> | Recoverin (Cancer-associated retinopathy protein) (Protein CAR).                                                                                       | Go Component not found |
| <b>Q01201</b> | Transcription factor RelB (I-Rel).                                                                                                                     | Go Component not found |
| <b>P48378</b> | DNA-binding protein RFX2.                                                                                                                              | Go Component not found |
| <b>P47736</b> | Rap1 GTPase-activating protein 1 (Rap1GAP).                                                                                                            | Go Component not found |
| <b>P41220</b> | [Regulator of G-protein signaling 2 (RGS2) (G0/G1 switch regulatory, protein 8).]                                                                      | Go Component not found |
| <b>Q9UGC6</b> | Regulator of G-protein signaling 17 (RGS17).                                                                                                           | Go Component not found |
| <b>P07998</b> | [Ribonuclease pancreatic precursor (EC 3.1.27.5) (RNase 1) (RNase A), (RNase Upl-1) (RIB-1) (HP-RNase).]                                               | Go Component not found |
| <b>Q9H9Y6</b> | [DNA-directed RNA polymerase I subunit RPA2 (EC 2.7.7.6) (RNA, polymerase I subunit 2) (DNA-directed RNA polymerase I 135 kDa, polypeptide) (RPA135).] | Go Component not found |
| <b>Q9UI43</b> | [Putative ribosomal RNA methyltransferase 2 (EC 2.1.1.-) (rRNA, (uridine-2'-O-)-methyltransferase).]                                                   | Go Component not found |
| <b>O95294</b> | RasGAP-activating-like protein 1.                                                                                                                      | Go Component not found |
| <b>P48443</b> | Retinoic acid receptor RXR-gamma (Retinoid X receptor gamma).                                                                                          | Go Component not found |
| <b>Q9NZJ4</b> | Saccin.                                                                                                                                                | Go Component not found |
| <b>Q15431</b> | Synaptonemal complex protein 1 (SCP-1).                                                                                                                | Go Component not found |
| <b>O43175</b> | D-3-phosphoglycerate dehydrogenase (EC 1.1.1.95) (3-PGDH).                                                                                             | Go Component not found |
| <b>Q13242</b> | [Splicing factor, arginine/serine-rich 9 (Pre-mRNA-splicing factor, SRp30C).]                                                                          | Go Component not found |
| <b>Q99962</b> | [SH3-containing GRB2-like protein 2 (EC 2.3.1.-) (Endophilin-1), (Endophilin-A1) (SH3 domain protein 2A) (EEN-B1).]                                    | Go Component not found |
| <b>Q15466</b> | [Nuclear receptor 0B2 (Orphan nuclear receptor SHP) (Small heterodimer, partner).]                                                                     | Go Component not found |
| <b>Q9BPZ7</b> | [Stress-activated map kinase-interacting protein 1 (SAPK-interacting, protein 1) (Putative Ras inhibitor JC310).]                                      | Go Component not found |
| <b>O95343</b> | Homeobox protein SIX3 (Sine oculis homeobox homolog 3).                                                                                                | Go Component not found |
| <b>Q92854</b> | [Semaphorin-4D precursor (Leukocyte activation antigen CD100) (BB18), (A8) (GR3).]                                                                     | Go Component not found |
| <b>Q9H3T2</b> | Semaphorin-6C precursor (Semaphorin Y) (Sema Y).                                                                                                       | Go Component not found |

|               |                                                                                                                                                                                                                                              |                        |
|---------------|----------------------------------------------------------------------------------------------------------------------------------------------------------------------------------------------------------------------------------------------|------------------------|
| <b>O15105</b> | [Mothers against decapentaplegic homolog 7 (SMAD 7) (Mothers against, DPP homolog 7) (Smad7) (hSMAD7).]                                                                                                                                      | Go Component not found |
| <b>P23327</b> | [Sarcoplasmic reticulum histidine-rich calcium-binding protein, precursor.]                                                                                                                                                                  | Go Component not found |
| <b>O75844</b> | [CAAX prenyl protease 1 homolog (EC 3.4.24.84) (Prenyl protein-specific, endoprotease 1) (Farnesylated proteins-converting enzyme 1) (FACE-1), (Zinc metalloproteinase Ste24 homolog).]                                                      | Go Component not found |
| <b>P51692</b> | Signal transducer and activator of transcription 5B.                                                                                                                                                                                         | Go Component not found |
| <b>Q06520</b> | [Bile salt sulfotransferase (EC 2.8.2.14) (Hydroxysteroid, Sulfotransferase) (HST) (Dehydroepiandrosterone sulfotransferase), (DHEA-ST) (ST2) (ST2A3).]                                                                                      | Go Component not found |
| <b>O15467</b> | [Small-inducible cytokine A16 precursor (CCL16) (IL-10-inducible, chemokine) (Chemokine LEC) (Liver-expressed chemokine) (Monotactin-1), (MTN-1) (Chemokine CC-4) (HCC-4) (NCC-4) (Lymphocyte and monocyte, chemoattractant) (LMC) (LCC-1).] | Go Component not found |
| <b>O15056</b> | [Synaptojanin-2 (EC 3.1.3.36) (Synaptic inositol-1,4,5-trisphosphate 5-, phosphatase 2).]                                                                                                                                                    | Go Component not found |
| <b>P02778</b> | [Small-inducible cytokine B10 precursor (CXCL10) (10 kDa interferon-, gamma-induced protein) (Gamma-IP10) (IP-10) [Contains: CXCL10(1-73)].]                                                                                                 | Go Component not found |
| <b>P48775</b> | [Tryptophan 2,3-dioxygenase (EC 1.13.11.11) (TO) (Tryptophan pyrrolase), (Tryptophanase) (Tryptophan oxygenase) (Tryptamin 2,3-dioxygenase), (TRPO).]                                                                                        | Go Component not found |
| <b>Q92917</b> | [G patch domain and KOW motifs-containing protein (G patch domain-, containing protein 5) (Protein MOS2 homolog) (Protein T54).]                                                                                                             | Go Component not found |
| <b>Q01995</b> | [Transgelin (Smooth muscle protein 22-alpha) (SM22-alpha) (WS3-10) (22, kDa actin-binding protein).]                                                                                                                                         | Go Component not found |
| <b>Q16559</b> | T-cell acute lymphocytic leukemia protein 2 (TAL-2).                                                                                                                                                                                         | Go Component not found |
| <b>P68366</b> | [Tubulin alpha-4A chain (Tubulin alpha-1 chain) (Alpha-tubulin 1), (Testis-specific alpha-tubulin) (Tubulin H2-alpha).]                                                                                                                      | Go Component not found |
| <b>Q16650</b> | T-brain-1 protein (T-box brain protein 1) (TBR-1) (TES-56).                                                                                                                                                                                  | Go Component not found |
| <b>O95988</b> | [T-cell leukemia/lymphoma protein 1B (Oncogene TCL1B), (Syncytiotrophoblast-specific protein) (SYN-1).]                                                                                                                                      | Go Component not found |
| <b>P24821</b> | [Tenascin precursor (TN) (Tenascin-C) (TN-C) (Hexabrachion), (Cytotactin) (Neuronectin) (GMEM) (JI) (Myotendinous antigen) (Glioma-, associated-extracellular matrix antigen) (GP 150-225).]                                                 | Go Component not found |
| <b>P10646</b> | [Tissue factor pathway inhibitor precursor (TFPI) (Lipoprotein-, associated coagulation inhibitor) (LACI) (Extrinsic pathway inhibitor), (EPI).]                                                                                             | Go Component not found |
| <b>P10827</b> | [Thyroid hormone receptor alpha (C-erbA-alpha) (c-erbA-1) (EAR-7), (EAR7).]                                                                                                                                                                  | Go Component not found |
| <b>P10599</b> | [Thioredoxin (Trx) (ATL-derived factor) (ADF) (Surface-associated, sulphhydryl protein) (SASP).]                                                                                                                                             | Go Component not found |
| <b>Q13009</b> | [T-lymphoma invasion and metastasis-inducing protein 1 (TIAM-1, protein).]                                                                                                                                                                   | Go Component not found |
| <b>P16035</b> | [Metalloproteinase inhibitor 2 precursor (TIMP-2) (Tissue inhibitor of, metalloproteinases 2) (CSC-21K).]                                                                                                                                    | Go Component not found |

|               |                                                                                                                                                                              |                        |
|---------------|------------------------------------------------------------------------------------------------------------------------------------------------------------------------------|------------------------|
| <b>Q06643</b> | [Lymphotoxin-beta (LT-beta) (Tumor necrosis factor C) (TNF-C) (Tumor, necrosis factor ligand superfamily member 3).]                                                         | Go Component not found |
| <b>P60174</b> | [Triosephosphate isomerase (EC 5.3.1.1) (TIM) (Triose-phosphate, isomerase).]                                                                                                | Go Component not found |
| <b>P02788</b> | [Lactotransferrin precursor (EC 3.4.21.-) (Lactoferrin), (Talakalactoferrin alfa) [Contains: Kaliocin-1; Lactoferroxin A; Lactoferroxin B; Lactoferroxin C].]                | Go Component not found |
| <b>P13805</b> | [Troponin T, slow skeletal muscle (TnTs) (Slow skeletal muscle troponin, T) (sTnT).]                                                                                         | Go Component not found |
| <b>Q16881</b> | [Thioredoxin reductase 1, cytoplasmic precursor (EC 1.8.1.9) (TR), (TR1).]                                                                                                   | Go Component not found |
| <b>P98066</b> | [Tumor necrosis factor-inducible protein TSG-6 precursor (TNF-, stimulated gene 6 protein) (Tumor necrosis factor, alpha-induced, protein 6) (Hyaluronate-binding protein).] | Go Component not found |
| <b>Q9BXU0</b> | Testis-expressed sequence 12 protein.                                                                                                                                        | Go Component not found |
| <b>P07101</b> | Tyrosine 3-monooxygenase (EC 1.14.16.2) (Tyrosine 3-hydroxylase) (TH).                                                                                                       | Go Component not found |
| <b>P22314</b> | Ubiquitin-activating enzyme E1 (A1S9 protein).                                                                                                                               | Go Component not found |
| <b>P40818</b> | [Ubiquitin carboxyl-terminal hydrolase 8 (EC 3.1.2.15) (Ubiquitin, thioesterase 8) (Ubiquitin-specific-processing protease 8), (Deubiquitinating enzyme 8) (hUBPy).]         | Go Component not found |
| <b>Q9UPU5</b> | [Ubiquitin carboxyl-terminal hydrolase 24 (EC 3.1.2.15) (Ubiquitin, thioesterase 24) (Ubiquitin-specific-processing protease 24), (Deubiquitinating enzyme 24).]             | Go Component not found |
| <b>P54855</b> | [UDP-glucuronosyltransferase 2B15 precursor (EC 2.4.1.17) (UDPGT), (UDPGTh-3) (HLUG4).]                                                                                      | Go Component not found |
| <b>Q15853</b> | [Upstream stimulatory factor 2 (Upstream transcription factor 2) (FOS-, interacting protein) (FIP) (Major late transcription factor 2).]                                     | Go Component not found |
| <b>O14607</b> | [Ubiquitously transcribed Y chromosome tetratricopeptide repeat protein, (Ubiquitously transcribed TPR protein on the Y chromosome).]                                        | Go Component not found |
| <b>Q93034</b> | [Cullin-5 (CUL-5) (Vasopressin-activated calcium-mobilizing receptor), (VACM-1).]                                                                                            | Go Component not found |
| <b>O95498</b> | [Vascular non-inflammatory molecule 2 precursor (Vanin-2), (Glycosylphosphatidyl inositol-anchored protein GPI-80) (Protein FOAP-, 4).]                                      | Go Component not found |
| <b>Q9Y4E6</b> | [WD repeat-containing protein 7 (TGF-beta resistance-associated protein, TRAG) (Rabconnectin-3 beta).]                                                                       | Go Component not found |
| <b>P04628</b> | Proto-oncogene protein Wnt-1 precursor.                                                                                                                                      | Go Component not found |
| <b>Q15884</b> | Uncharacterized protein C9orf61 (Protein X123).                                                                                                                              | Go Component not found |
| <b>Q02040</b> | [Splicing factor, arginine/serine-rich 17A (Protein XE7) (B-lymphocyte, antigen) (721P).]                                                                                    | Go Component not found |
| <b>P28715</b> | [DNA-repair protein complementing XP-G cells (Xeroderma pigmentosum, group G-complementing protein) (DNA excision repair protein ERCC-5).]                                   | Go Component not found |

|               |                                                                                                                                                                                                                                                         |                        |
|---------------|---------------------------------------------------------------------------------------------------------------------------------------------------------------------------------------------------------------------------------------------------------|------------------------|
| <b>P42331</b> | Rho GTPase-activating protein 25.                                                                                                                                                                                                                       | Go Component not found |
| <b>Q14699</b> | [Raftlin (Raft-linking protein) (Cell migration-inducing gene 2, protein).]                                                                                                                                                                             | Go Component not found |
| <b>Q14165</b> | Uncharacterized protein KIAA0152 precursor.                                                                                                                                                                                                             | Go Component not found |
| <b>Q14689</b> | Disco-interacting protein 2 homolog A.                                                                                                                                                                                                                  | Go Component not found |
| <b>Q92599</b> | Septin-8.                                                                                                                                                                                                                                               | Go Component not found |
| <b>Q92628</b> | Uncharacterized protein KIAA0232.                                                                                                                                                                                                                       | Go Component not found |
| <b>O15016</b> | Tripartite motif-containing protein 66.                                                                                                                                                                                                                 | Go Component not found |
| <b>O15084</b> | Ankyrin repeat domain-containing protein 28.                                                                                                                                                                                                            | Go Component not found |
| <b>Q9NUA8</b> | Zinc finger and BTB domain-containing protein 40.                                                                                                                                                                                                       | Go Component not found |
| <b>O94876</b> | Transmembrane and coiled-coil domains protein 1.                                                                                                                                                                                                        | Go Component not found |
| <b>O94967</b> | WD repeat-containing protein 47.                                                                                                                                                                                                                        | Go Component not found |
| <b>O60810</b> | PRAME family member 4.                                                                                                                                                                                                                                  | Go Component not found |
| <b>Q9ULJ7</b> | Ankyrin repeat domain-containing protein 50.                                                                                                                                                                                                            | Go Component not found |
| <b>P07947</b> | [Proto-oncogene tyrosine-protein kinase Yes (EC 2.7.10.2) (p61-Yes) (c-, Yes).]                                                                                                                                                                         | Go Component not found |
| <b>O15231</b> | Zinc finger protein 185 (LIM domain protein ZNF185) (P1-A).                                                                                                                                                                                             | Go Component not found |
| <b>Q9UJU3</b> | Zinc finger protein 228.                                                                                                                                                                                                                                | Go Component not found |
| <b>Q14202</b> | Zinc finger MYM-type protein 3 (Zinc finger protein 261).                                                                                                                                                                                               | Go Component not found |
| <b>Q14586</b> | Zinc finger protein 267 (Zinc finger protein HZF2).                                                                                                                                                                                                     | Go Component not found |
| <b>P17097</b> | [Zinc finger protein 7 (Zinc finger protein KOX4) (Zinc finger protein, HF.16).]                                                                                                                                                                        | Go Component not found |
| <b>P16190</b> | [HLA class I histocompatibility antigen, A-33 alpha chain precursor, (MHC class I antigen A*33) (Aw-33) (Aw-19).]                                                                                                                                       | Go Component not found |
| <b>Q10567</b> | [AP-1 complex subunit beta-1 (Adapter-related protein complex 1 beta-1, subunit) (Beta-adaptin 1) (Adaptor protein complex AP-1 beta-1, subunit) (Golgi adaptor HA1/AP1 adaptin beta subunit) (Clathrin, assembly protein complex 1 beta large chain).] | Go Component not found |

|               |                                                                                                                                                                                                |                        |
|---------------|------------------------------------------------------------------------------------------------------------------------------------------------------------------------------------------------|------------------------|
| <b>P98198</b> | [Probable phospholipid-transporting ATPase ID (EC 3.6.3.1) (ATPase, class I type 8B member 2).]                                                                                                | Go Component not found |
| <b>P42684</b> | [Tyrosine-protein kinase ABL2 (EC 2.7.10.2) (Abelson murine leukemia, viral oncogene homolog 2) (Abelson-related gene protein) (Tyrosine, kinase ARG).]                                        | Go Component not found |
| <b>O43506</b> | [ADAM 20 precursor (EC 3.4.24.-) (A disintegrin and metalloproteinase, domain 20).]                                                                                                            | Go Component not found |
| <b>P55197</b> | Protein AF-10.                                                                                                                                                                                 | Go Component not found |
| <b>Q9Y4K1</b> | Absent in melanoma 1 protein.                                                                                                                                                                  | Go Component not found |
| <b>Q9UKA4</b> | [A-kinase anchor protein 11 (Protein kinase A-anchoring protein 11), (PRKA11) (A kinase anchor protein 220 kDa) (AKAP 220) (hAKAP220).]                                                        | Go Component not found |
| <b>P09972</b> | Fructose-bisphosphate aldolase C (EC 4.1.2.13) (Brain-type aldolase).                                                                                                                          | Go Component not found |
| <b>Q01432</b> | [AMP deaminase 3 (EC 3.5.4.6) (AMP deaminase isoform E) (Erythrocyte, AMP deaminase).]                                                                                                         | Go Component not found |
| <b>O75106</b> | [Retina-specific copper amine oxidase precursor (EC 1.4.3.6) (RAO), (Amine oxidase [copper-containing]).]                                                                                      | Go Component not found |
| <b>Q99767</b> | [Amyloid beta A4 precursor protein-binding family A member 2 (Neuron-, specific X11L protein) (Neuronal Munc18-1-interacting protein 2), (Mint-2) (Adapter protein X11beta).]                  | Go Component not found |
| <b>P35626</b> | [Beta-adrenergic receptor kinase 2 (EC 2.7.11.15) (Beta-ARK-2) (G-, protein-coupled receptor kinase 3).]                                                                                       | Go Component not found |
| <b>P17405</b> | [Sphingomyelin phosphodiesterase precursor (EC 3.1.4.12) (Acid, sphingomyelinase) (aSMase).]                                                                                                   | Go Component not found |
| <b>Q99766</b> | [ATP synthase subunit s, mitochondrial precursor (ATP synthase-coupling, factor B) (Mitochondrial ATP synthase regulatory component factor B).]                                                | Go Component not found |
| <b>Q9UHI8</b> | [ADAMTS-1 precursor (EC 3.4.24.-) (A disintegrin and metalloproteinase, with thrombospondin motifs 1) (ADAM-TS 1) (ADAM-TS1) (METH-1).]                                                        | Go Component not found |
| <b>Q9UKP4</b> | [ADAMTS-7 precursor (EC 3.4.24.-) (A disintegrin and metalloproteinase, with thrombospondin motifs 7) (ADAM-TS 7) (ADAM-TS7).]                                                                 | Go Component not found |
| <b>Q9Y679</b> | Ancient ubiquitous protein 1 precursor.                                                                                                                                                        | Go Component not found |
| <b>P46379</b> | [Large proline-rich protein BAT3 (HLA-B-associated transcript 3), (Protein G3).]                                                                                                               | Go Component not found |
| <b>Q9Y6D6</b> | [Brefeldin A-inhibited guanine nucleotide-exchange protein 1 (Brefeldin, A-inhibited GEP 1) (p200 ARF-GEP1) (p200 ARF guanine nucleotide, exchange factor).]                                   | Go Component not found |
| <b>Q9NR09</b> | [Baculoviral IAP repeat-containing protein 6 (Ubiquitin-conjugating BIR, domain enzyme apollon).]                                                                                              | Go Component not found |
| <b>O00327</b> | [Aryl hydrocarbon receptor nuclear translocator-like protein 1 (Brain, and muscle ARNT-like 1) (Member of PAS protein 3) (Basic-helix-loop-, helix-PAS protein MOP3) (bHLH-PAS protein JAP3).] | Go Component not found |
| <b>P25440</b> | Bromodomain-containing protein 2 (Protein RING3) (O27.1.1).                                                                                                                                    | Go Component not found |



|               |                                                                                                                                                                                                                                                                                                                                                                                                                                                                                           |                        |
|---------------|-------------------------------------------------------------------------------------------------------------------------------------------------------------------------------------------------------------------------------------------------------------------------------------------------------------------------------------------------------------------------------------------------------------------------------------------------------------------------------------------|------------------------|
| <b>O60885</b> | Bromodomain-containing protein 4 (HUNK1 protein).                                                                                                                                                                                                                                                                                                                                                                                                                                         | Go Component not found |
| <b>Q9UMQ3</b> | Homeobox protein BarH-like 2.                                                                                                                                                                                                                                                                                                                                                                                                                                                             | Go Component not found |
| <b>P43251</b> | Biotinidase precursor (EC 3.5.1.12).                                                                                                                                                                                                                                                                                                                                                                                                                                                      | Go Component not found |
| <b>Q15332</b> | 13.2 kDa protein in chromosome 11.                                                                                                                                                                                                                                                                                                                                                                                                                                                        | Go Component not found |
| <b>P08123</b> | Collagen alpha-2(I) chain precursor (Alpha-2 type I collagen).                                                                                                                                                                                                                                                                                                                                                                                                                            | Go Component not found |
| <b>Q9NP86</b> | Calcium-binding protein 5 (CaBP5).                                                                                                                                                                                                                                                                                                                                                                                                                                                        | Go Component not found |
| <b>O75309</b> | Cadherin-16 precursor (Kidney-specific cadherin) (Ksp-cadherin).                                                                                                                                                                                                                                                                                                                                                                                                                          | Go Component not found |
| <b>O75493</b> | [Carbonic anhydrase-related protein 11 precursor (CA-XI) (CARP XI) (CA-, RP XI) (Carbonic anhydrase-related protein 2) (CARP-2) (CA-RP II).]                                                                                                                                                                                                                                                                                                                                              | Go Component not found |
| <b>Q9Y6Q1</b> | Calpain-6 (Calpamodulin) (CalpM) (Calpain-like protease X-linked).                                                                                                                                                                                                                                                                                                                                                                                                                        | Go Component not found |
| <b>P56202</b> | Cathepsin W precursor (EC 3.4.22.-) (Lymphopain).                                                                                                                                                                                                                                                                                                                                                                                                                                         | Go Component not found |
| <b>P08185</b> | [Corticosteroid-binding globulin precursor (CBG) (Transcortin) (Serpine, A6).]                                                                                                                                                                                                                                                                                                                                                                                                            | Go Component not found |
| <b>Q9NTU7</b> | Cerebellin-4 precursor (Cerebellin-like glycoprotein 1).                                                                                                                                                                                                                                                                                                                                                                                                                                  | Go Component not found |
| <b>P00746</b> | [Complement factor D precursor (EC 3.4.21.46) (C3 convertase activator), (Properdin factor D) (Adipsin).]                                                                                                                                                                                                                                                                                                                                                                                 | Go Component not found |
| <b>O15519</b> | [CASP8 and FADD-like apoptosis regulator precursor (Cellular FLICE-like, inhibitory protein) (c-FLIP) (Caspase-eight-related protein) (Casper), (Caspase-like apoptosis regulatory protein) (CLARP) (MACH-related, inducer of toxicity) (MRIT) (Caspase homolog) (CASH) (Inhibitor of, FLICE) (I-FLICE) (FADD-like antiapoptotic molecule 1) (FLAME-1), (Usurpin) [Contains: CASP8 and FADD-like apoptosis regulator subunit, p43; CASP8 and FADD-like apoptosis regulator subunit p12].] | Go Component not found |
| <b>O96020</b> | G1/S-specific cyclin-E2.                                                                                                                                                                                                                                                                                                                                                                                                                                                                  | Go Component not found |
| <b>Q16880</b> | [2-hydroxyacylsphingosine 1-beta-galactosyltransferase precursor, (EC 2.4.1.45) (UDP-galactose-ceramide galactosyltransferase) (Ceramide, UDP-galactosyltransferase) (Cerebroside synthase).]                                                                                                                                                                                                                                                                                             | Go Component not found |
| <b>O14647</b> | [Chromodomain-helicase-DNA-binding protein 2 (EC 3.6.1.-) (ATP-, dependent helicase CHD2) (CHD-2).]                                                                                                                                                                                                                                                                                                                                                                                       | Go Component not found |
| <b>Q9NYG8</b> | [Potassium channel subfamily K member 4 (TWIK-related arachidonic acid-, stimulated potassium channel protein) (TRAAK) (Two pore K(+) channel, KT4.1).]                                                                                                                                                                                                                                                                                                                                   | Go Component not found |
| <b>P57789</b> | [Potassium channel subfamily K member 10 (Outward rectifying potassium, channel protein TREK-2) (TREK-2 K(+) channel subunit).]                                                                                                                                                                                                                                                                                                                                                           | Go Component not found |
| <b>P51798</b> | Chloride channel protein 7 (ClC-7).                                                                                                                                                                                                                                                                                                                                                                                                                                                       | Go Component not found |

|               |                                                                                                                                                                                                        |                        |
|---------------|--------------------------------------------------------------------------------------------------------------------------------------------------------------------------------------------------------|------------------------|
| <b>P53675</b> | Clathrin heavy chain 2 (CLH-2).                                                                                                                                                                        | Go Component not found |
| <b>Q01064</b> | [Calcium/calmodulin-dependent 3',5'-cyclic nucleotide phosphodiesterase, 1B (EC 3.1.4.17) (Cam-PDE 1B) (63 kDa Cam-PDE).]                                                                              | Go Component not found |
| <b>P09543</b> | [2',3'-cyclic-nucleotide 3'-phosphodiesterase (EC 3.1.4.37) (CNP), (CNPase).]                                                                                                                          | Go Component not found |
| <b>O95263</b> | [High affinity cAMP-specific and IBMX-insensitive 3',5'-cyclic, phosphodiesterase 8B (EC 3.1.4.17) (HSPDE8B).]                                                                                         | Go Component not found |
| <b>P35913</b> | [Rod cGMP-specific 3',5'-cyclic phosphodiesterase subunit beta, precursor (EC 3.1.4.35) (GMP-PDE beta).]                                                                                               | Go Component not found |
| <b>POCOL4</b> | [Complement C4-A precursor (Acidic complement C4) [Contains: Complement, C4 beta chain; Complement C4-A alpha chain; C4a anaphylatoxin; C4b-A;, C4d-A; Complement C4 gamma chain].]                    | Go Component not found |
| <b>P13671</b> | Complement component C6 precursor.                                                                                                                                                                     | Go Component not found |
| <b>Q13085</b> | [Acetyl-CoA carboxylase 1 (EC 6.4.1.2) (ACC-alpha) [Includes: Biotin, carboxylase (EC 6.3.4.14)].]                                                                                                     | Go Component not found |
| <b>Q16850</b> | [Cytochrome P450 51A1 (EC 1.14.13.70) (CYPLI) (P450LI) (Sterol 14-alpha, demethylase) (Lanosterol 14-alpha demethylase) (LDM) (P450-14DM), (P45014DM).]                                                | Go Component not found |
| <b>Q9UNU6</b> | [Cytochrome P450 8B1 (EC 1.14.13.95) (CYPVIIIB1) (7-alpha-, hydroxycholest-4-en-3-one 12-alpha-hydroxylase) (Sterol 12-alpha-, hydroxylase) (7-alpha-hydroxy-4-cholesten-3-one 12-alpha-hydroxylase).] | Go Component not found |
| <b>P98187</b> | Cytochrome P450 4F8 (EC 1.14.14.1) (CYPIVF8).                                                                                                                                                          | Go Component not found |
| <b>P53673</b> | Beta-crystallin A4 (Beta-A4 crystallin).                                                                                                                                                               | Go Component not found |
| <b>P23508</b> | Colorectal mutant cancer protein (Protein MCC).                                                                                                                                                        | Go Component not found |
| <b>O14578</b> | [Citron Rho-interacting kinase (EC 2.7.11.1) (CRIK) (Rho-interacting,, serine/threonine-protein kinase 21).]                                                                                           | Go Component not found |
| <b>P39880</b> | Homeobox protein cut-like 1 (CCAAT displacement protein) (CDP).                                                                                                                                        | Go Component not found |
| <b>Q14093</b> | Cylicin-2 (Cylicin II) (Multiple-band polypeptide II).                                                                                                                                                 | Go Component not found |
| <b>P62938</b> | [Peptidyl-prolyl cis-trans isomerase A (EC 5.2.1.8) (PPIase A), (Rotamase A) (Cyclophilin A) (Cyclosporin A-binding protein).]                                                                         | Go Component not found |
| <b>O76096</b> | [Cystatin-F precursor (Leukocystatin) (Cystatin-7) (Cystatin-like, metastasis-associated protein) (CMAP).]                                                                                             | Go Component not found |
| <b>PO6132</b> | Uroporphyrinogen decarboxylase (EC 4.1.1.37) (URO-D) (UPD).                                                                                                                                            | Go Component not found |
| <b>O15523</b> | [ATP-dependent RNA helicase DDX3Y (EC 3.6.1.-) (DEAD box protein 3, Y-, chromosomal).]                                                                                                                 | Go Component not found |
| <b>P30837</b> | [Aldehyde dehydrogenase X, mitochondrial precursor (EC 1.2.1.3), (Aldehyde dehydrogenase family 1 member B1) (ALDH class 2).]                                                                          | Go Component not found |

|               |                                                                                                                                                                                                                                                                                       |                        |
|---------------|---------------------------------------------------------------------------------------------------------------------------------------------------------------------------------------------------------------------------------------------------------------------------------------|------------------------|
| <b>P80365</b> | [Corticosteroid 11-beta-dehydrogenase isozyme 2 (EC 1.1.1.-) (11-DH2), (11-beta-hydroxysteroid dehydrogenase type 2) (11-beta-HSD2) (NAD-, dependent 11-beta-hydroxysteroid dehydrogenase).]                                                                                          | Go Component not found |
| <b>P31689</b> | [DnaJ homolog subfamily A member 1 (Heat shock 40 kDa protein 4) (DnaJ, protein homolog 2) (HDJ-2) (HSJ-2) (HSDJ).]                                                                                                                                                                   | Go Component not found |
| <b>Q16555</b> | [Dihydropyrimidinase-related protein 2 (DRP-2) (Collapsin response, mediator protein 2) (CRMP-2) (N2A3).]                                                                                                                                                                             | Go Component not found |
| <b>Q13609</b> | [Deoxyribonuclease gamma precursor (EC 3.1.21.-) (DNase gamma), (Deoxyribonuclease I-like 3) (DNase I homolog protein DHP2) (Liver and, spleen DNase) (LS-DNase) (LSD).]                                                                                                              | Go Component not found |
| <b>Q02487</b> | [Desmocollin-2 precursor (Desmosomal glycoprotein II and III), (Desmocollin-3).]                                                                                                                                                                                                      | Go Component not found |
| <b>P63172</b> | [Dynein light chain Tctex-type 1 (T-complex testis-specific protein 1, homolog) (Protein CW-1).]                                                                                                                                                                                      | Go Component not found |
| <b>P00374</b> | Dihydrofolate reductase (EC 1.5.1.3).                                                                                                                                                                                                                                                 | Go Component not found |
| <b>Q13201</b> | [Multimerin-1 precursor (Endothelial cell multimerin 1) (EMILIN-4), (Elastin microfibril interface located protein 4) (Elastin microfibril, interfacier 4).]                                                                                                                          | Go Component not found |
| <b>P13639</b> | Elongation factor 2 (EF-2).                                                                                                                                                                                                                                                           | Go Component not found |
| <b>P55199</b> | [RNA polymerase II elongation factor ELL (Eleven-nineteen lysine-rich, leukemia protein).]                                                                                                                                                                                            | Go Component not found |
| <b>Q12926</b> | [ELAV-like protein 2 (Hu-antigen B) (HuB) (ELAV-like neuronal protein, 1) (Nervous system-specific RNA-binding protein Hel-N1).]                                                                                                                                                      | Go Component not found |
| <b>Q05524</b> | [Alpha-enolase, lung specific (EC 4.2.1.11) (2-phospho-D-glycerate, hydro-lyase) (Non-neural enolase) (NNE) (Phosphopyruvate hydratase), (HLE1).]                                                                                                                                     | Go Component not found |
| <b>P62508</b> | [Estrogen-related receptor gamma (Estrogen receptor-related protein 3), (ERR gamma-2).]                                                                                                                                                                                               | Go Component not found |
| <b>P23141</b> | [Liver carboxylesterase 1 precursor (EC 3.1.1.1) (Acyl coenzyme, A:cholesterol acyltransferase) (ACAT) (Monocyte/macrophage serine, esterase) (HMSE) (Serine esterase 1) (Brain carboxylesterase hBr1), (Triacylglycerol hydrolase) (TGH) (Egasyn) (Retinyl ester hydrolase), (REH).] | Go Component not found |
| <b>P49640</b> | Homeobox even-skipped homolog protein 1 (EVX-1).                                                                                                                                                                                                                                      | Go Component not found |
| <b>O00757</b> | [Fructose-1,6-bisphosphatase isozyme 2 (EC 3.1.3.11) (D-fructose-1,6-, bisphosphate 1-phosphohydrolase 2) (FBPase 2).]                                                                                                                                                                | Go Component not found |
| <b>Q16877</b> | [6-phosphofructo-2-kinase/fructose-2,6-bisphosphatase 4 (6PF-2-K/Fru-, 2,6-P2ASE testis-type isozyme) [Includes: 6-phosphofructo-2-kinase, (EC 2.7.1.105); Fructose-2,6-bisphosphatase (EC 3.1.3.46)].]                                                                               | Go Component not found |
| <b>O75844</b> | [CAAX prenyl protease 1 homolog (EC 3.4.24.84) (Prenyl protein-specific, endoprotease 1) (Farnesylated proteins-converting enzyme 1) (FACE-1), (Zinc metalloproteinase Ste24 homolog).]                                                                                               | Go Component not found |
| <b>O00507</b> | [Probable ubiquitin carboxyl-terminal hydrolase FAF-Y (EC 3.1.2.15), (Ubiquitin thioesterase FAF-Y) (Ubiquitin-specific-processing protease, FAF-Y) (Deubiquitinating enzyme FAF-Y) (Fat facets protein-related, Y-, linked) (Ubiquitin-specific protease 9, Y chromosome).]          | Go Component not found |
| <b>Q14296</b> | Fas-activated serine/threonine kinase (EC 2.7.11.8) (FAST kinase).                                                                                                                                                                                                                    | Go Component not found |

|               |                                                                                                                                                                                                                                                                                             |                        |
|---------------|---------------------------------------------------------------------------------------------------------------------------------------------------------------------------------------------------------------------------------------------------------------------------------------------|------------------------|
| <b>P21781</b> | [Keratinocyte growth factor precursor (KGF) (Fibroblast growth factor, 7) (FGF-7) (HBGF-7).]                                                                                                                                                                                                | Go Component not found |
| <b>Q99518</b> | [Dimethylaniline monooxygenase [N-oxide-forming] 2 (EC 1.14.13.8), (Pulmonary flavin-containing monooxygenase 2) (FMO 2) (Dimethylaniline, oxidase 2) (FMO 1B1).]                                                                                                                           | Go Component not found |
| <b>Q9Y297</b> | [F-box/WD repeat-containing protein 1A (F-box and WD repeats protein, beta-TrCP) (E3RSIkappaB) (plkappaBalpha-E3 receptor subunit).]                                                                                                                                                        | Go Component not found |
| <b>Q08050</b> | [Forkhead box protein M1 (Forkhead-related protein FKHL16) (Hepatocyte, nuclear factor 3 forkhead homolog 11) (HNF-3/fork-head homolog 11), (HFH-11) (Winged-helix factor from INS-1 cells) (M-phase, phosphoprotein 2) (MPM-2 reactive phosphoprotein 2) (Transcription, factor Trident).] | Go Component not found |
| <b>P34059</b> | [N-acetylgalactosamine-6-sulfatase precursor (EC 3.1.6.4) (N-, acetylgalactosamine-6-sulfate sulfatase) (Galactose-6-sulfate, sulfatase) (GalNAc6S sulfatase) (Chondroitinsulfatase), (Chondroitinase).]                                                                                    | Go Component not found |
| <b>P87889</b> | [HERV-K_5q33.3 provirus ancestral Gag polyprotein (Gag polyprotein), (HERV-K10 Gag protein) (HERV-K107 Gag protein) [Contains: Matrix, protein; Capsid protein; Nucleocapsid protein].]                                                                                                     | Go Component not found |
| <b>P38405</b> | [Guanine nucleotide-binding protein G(olf) subunit alpha (Adenylate, cyclase-stimulating G alpha protein, olfactory type).]                                                                                                                                                                 | Go Component not found |
| <b>P32456</b> | [Interferon-induced guanylate-binding protein 2 (GTP-binding protein 2), (Guanine nucleotide-binding protein 2) (GBP-2) (HuGBP-2).]                                                                                                                                                         | Go Component not found |
| <b>Q9UK05</b> | [Growth/differentiation factor 2 precursor (GDF-2) (Bone morphogenetic, protein 9) (BMP-9).]                                                                                                                                                                                                | Go Component not found |
| <b>P15586</b> | [N-acetylglucosamine-6-sulfatase precursor (EC 3.1.6.14) (G6S), (Glucosamine-6-sulfatase).]                                                                                                                                                                                                 | Go Component not found |
| <b>Q04446</b> | [1,4-alpha-glucan-branching enzyme (EC 2.4.1.18) (Glycogen-branching, enzyme) (Brancher enzyme).]                                                                                                                                                                                           | Go Component not found |
| <b>P57057</b> | [Glycerol-3-phosphate transporter (G-3-P transporter) (G-3-P permease), (Solute carrier family 37 member 1).]                                                                                                                                                                               | Go Component not found |
| <b>P46926</b> | [Glucosamine-6-phosphate isomerase (EC 3.5.99.6) (Glucosamine-6-, phosphate deaminase) (GNPDA) (GlcN6P deaminase) (Oscillin).]                                                                                                                                                              | Go Component not found |
| <b>P48506</b> | [Glutamate--cysteine ligase catalytic subunit (EC 6.3.2.2) (Gamma-, glutamylcysteine synthetase) (Gamma-ECS) (GCS heavy chain).]                                                                                                                                                            | Go Component not found |
| <b>P98176</b> | Histone H2A-Bbd (H2A Barr body-deficient) (H2A.Bbd).                                                                                                                                                                                                                                        | Go Component not found |
| <b>P61920</b> | [Hemoglobin subunit gamma-1 (Hemoglobin gamma-1 chain) (Gamma-1-globin), (Hemoglobin gamma-A chain).]                                                                                                                                                                                       | Go Component not found |
| <b>Q14469</b> | [Transcription factor HES-1 (Hairy and enhancer of split 1) (Hairy-, like) (HHL) (Hairy homolog).]                                                                                                                                                                                          | Go Component not found |
| <b>P46597</b> | [Hydroxyindole O-methyltransferase (EC 2.1.1.4) (HIOMT), (Acetylserotonin O-methyltransferase) (ASMT).]                                                                                                                                                                                     | Go Component not found |
| <b>P50135</b> | Histamine N-methyltransferase (EC 2.1.1.8) (HMT).                                                                                                                                                                                                                                           | Go Component not found |
| <b>P20823</b> | [Hepatocyte nuclear factor 1-alpha (HNF-1A) (Liver-specific, transcription factor LF-B1) (LFB1) (Transcription factor 1) (TCF-1).]                                                                                                                                                          | Go Component not found |

|               |                                                                                                                                                         |                        |
|---------------|---------------------------------------------------------------------------------------------------------------------------------------------------------|------------------------|
| <b>P34931</b> | [Heat shock 70 kDa protein 1L (Heat shock 70 kDa protein 1-like) (Heat, shock 70 kDa protein 1-Hom) (HSP70-Hom).]                                       | Go Component not found |
| <b>P25092</b> | [Heat-stable enterotoxin receptor precursor (EC 4.6.1.2) (GC-C), (Intestinal guanylate cyclase) (STA receptor) (hSTAR).]                                | Go Component not found |
| <b>P42357</b> | Histidine ammonia-lyase (EC 4.3.1.3) (Histidase).                                                                                                       | Go Component not found |
| <b>P31260</b> | Homeobox protein Hox-A10 (Hox-1H) (Hox-1.8) (PL).                                                                                                       | Go Component not found |
| <b>Q00444</b> | Homeobox protein Hox-C5 (Hox-3D) (CP11).                                                                                                                | Go Component not found |
| <b>O43248</b> | Homeobox protein Hox-C11.                                                                                                                               | Go Component not found |
| <b>P35453</b> | Homeobox protein Hox-D13 (Hox-4I).                                                                                                                      | Go Component not found |
| <b>P24592</b> | [Insulin-like growth factor-binding protein 6 precursor (IGFBP-6) (IBP-, 6) (IGF-binding protein 6).]                                                   | Go Component not found |
| <b>P51878</b> | [Caspase-5 precursor (EC 3.4.22.58) (CASP-5) (ICH-3 protease) (TY, protease) (ICE(rel)-III) [Contains: Caspase-5 subunit p20; Caspase-5, subunit p10].] | Go Component not found |
| <b>O60841</b> | [Eukaryotic translation initiation factor 5B (eIF-5B) (Translation, initiation factor IF-2).]                                                           | Go Component not found |
| <b>P49895</b> | [Type I iodothyronine deiodinase (EC 1.97.1.10) (Type-I 5'-deiodinase), (DIOI) (Type 1 DI) (5DI).]                                                      | Go Component not found |
| <b>Q9Y2B9</b> | cAMP-dependent protein kinase inhibitor gamma (PKI-gamma).                                                                                              | Go Component not found |
| <b>P10914</b> | Interferon regulatory factor 1 (IRF-1).                                                                                                                 | Go Component not found |
| <b>O14896</b> | Interferon regulatory factor 6 (IRF-6).                                                                                                                 | Go Component not found |
| <b>P52333</b> | [Tyrosine-protein kinase JAK3 (EC 2.7.10.2) (Janus kinase 3) (JAK-3), (Leukocyte janus kinase) (L-JAK).]                                                | Go Component not found |
| <b>P13646</b> | [Keratin, type I cytoskeletal 13 (Cytokeratin-13) (CK-13) (Keratin-13), (K13).]                                                                         | Go Component not found |
| <b>P78368</b> | Casein kinase I isoform gamma-2 (EC 2.7.11.1) (CKI-gamma 2).                                                                                            | Go Component not found |
| <b>Q16566</b> | [Calcium/calmodulin-dependent protein kinase type IV (EC 2.7.11.17), (CAM kinase-GR) (CaMK IV).]                                                        | Go Component not found |
| <b>P52824</b> | [Diacylglycerol kinase theta (EC 2.7.1.107) (Diglyceride kinase theta), (DGK-theta) (DAG kinase theta).]                                                | Go Component not found |
| <b>Q13237</b> | [cGMP-dependent protein kinase 2 (EC 2.7.11.12) (CGK 2) (cGKII) (Type, II cGMP-dependent protein kinase).]                                              | Go Component not found |
| <b>Q9UH77</b> | Kelch-like protein 3.                                                                                                                                   | Go Component not found |

|               |                                                                                                                                                                                                                                                                      |                        |
|---------------|----------------------------------------------------------------------------------------------------------------------------------------------------------------------------------------------------------------------------------------------------------------------|------------------------|
| <b>Q15726</b> | [Metastasis-suppressor KiSS-1 precursor (Kisspeptin-1) [Contains: Metastin (Kisspeptin-54); Kisspeptin-14; Kisspeptin-13; Kisspeptin-, 10].]                                                                                                                         | Go Component not found |
| <b>Q9Y4X4</b> | Krueppel-like factor 12 (Transcriptional repressor AP-2rep).                                                                                                                                                                                                         | Go Component not found |
| <b>P49862</b> | [Kallikrein-7 precursor (EC 3.4.21.117) (hK7) (Stratum corneum, chymotryptic enzyme) (hSCCE) (Serine protease 6).]                                                                                                                                                   | Go Component not found |
| <b>P46020</b> | [Phosphorylase b kinase regulatory subunit alpha, skeletal muscle, isoform (Phosphorylase kinase alpha M subunit).]                                                                                                                                                  | Go Component not found |
| <b>P11908</b> | [Ribose-phosphate pyrophosphokinase II (EC 2.7.6.1) (Phosphoribosyl, pyrophosphate synthetase II) (PRS-II) (PPRibP).]                                                                                                                                                | Go Component not found |
| <b>Q13449</b> | Limbic system-associated membrane protein precursor (LSAMP).                                                                                                                                                                                                         | Go Component not found |
| <b>P33121</b> | [Long-chain-fatty-acid--CoA ligase 1 (EC 6.2.1.3) (Long-chain acyl-CoA, synthetase 1) (LACS 1) (Palmitoyl-CoA ligase 1) (Long-chain fatty acid, CoA ligase 2) (Long-chain acyl-CoA synthetase 2) (LACS 2) (Acyl-CoA, synthetase 1) (ACS1) (Palmitoyl-CoA ligase 2).] | Go Component not found |
| <b>P48357</b> | [Leptin receptor precursor (LEP-R) (OB receptor) (OB-R) (HuB219) (CD295, antigen).]                                                                                                                                                                                  | Go Component not found |
| <b>P07098</b> | [Gastric triacylglycerol lipase precursor (EC 3.1.1.3) (Gastric lipase), (GL).]                                                                                                                                                                                      | Go Component not found |
| <b>P09917</b> | Arachidonate 5-lipoxygenase (EC 1.13.11.34) (5-lipoxygenase) (5-LO).                                                                                                                                                                                                 | Go Component not found |
| <b>Q14596</b> | [Next to BRCA1 gene 1 protein (Neighbor of BRCA1 gene 1 protein), (Membrane component, chromosome 17, surface marker 2) (1A1-3B).]                                                                                                                                   | Go Component not found |
| <b>Q99683</b> | [Mitogen-activated protein kinase kinase kinase 5 (EC 2.7.11.25), (MAPK/ERK kinase kinase 5) (MEK kinase 5) (MEKK 5) (Apoptosis signal-, regulating kinase 1) (ASK-1).]                                                                                              | Go Component not found |
| <b>P43360</b> | Melanoma-associated antigen 6 (MAGE-6 antigen) (MAGE3B).                                                                                                                                                                                                             | Go Component not found |
| <b>P20794</b> | [Serine/threonine-protein kinase MAK (EC 2.7.11.22) (Male germ cell-, associated kinase).]                                                                                                                                                                           | Go Component not found |
| <b>O00462</b> | [Beta-mannosidase precursor (EC 3.2.1.25) (Lysosomal beta A, mannosidase) (Mannanase) (Mannase).]                                                                                                                                                                    | Go Component not found |
| <b>P08235</b> | Mineralocorticoid receptor (MR).                                                                                                                                                                                                                                     | Go Component not found |
| <b>Q14814</b> | Myocyte-specific enhancer factor 2D.                                                                                                                                                                                                                                 | Go Component not found |
| <b>Q08431</b> | [Lactadherin precursor (Milk fat globule-EGF factor 8) (MFG-E8) (HMFG), (Breast epithelial antigen BA46) (MFGM) [Contains: Lactadherin short, form; Medin].]                                                                                                         | Go Component not found |
| <b>O15479</b> | [Melanoma-associated antigen B2 (MAGE-B2 antigen) (DSS-AHC critical, interval MAGE superfamily 6) (DAM6) (MAGE XP-2).]                                                                                                                                               | Go Component not found |
| <b>Q9UJ55</b> | MAGE-like protein 2 (Necdin-like protein 1) (Protein nM15).                                                                                                                                                                                                          | Go Component not found |

|               |                                                                                                                                                                                                                                                                       |                        |
|---------------|-----------------------------------------------------------------------------------------------------------------------------------------------------------------------------------------------------------------------------------------------------------------------|------------------------|
| <b>P31152</b> | [Mitogen-activated protein kinase 4 (EC 2.7.11.24) (Extracellular, signal-regulated kinase 4) (ERK-4) (MAP kinase isoform p63) (p63-, MAPK).]                                                                                                                         | Go Component not found |
| <b>P41218</b> | Myeloid cell nuclear differentiation antigen.                                                                                                                                                                                                                         | Go Component not found |
| <b>P46734</b> | [Dual specificity mitogen-activated protein kinase kinase 3, (EC 2.7.12.2) (MAP kinase kinase 3) (MAPKK 3) (MAPK/ERK kinase 3).]                                                                                                                                      | Go Component not found |
| <b>Q06455</b> | [Protein CBFA2T1 (Protein MTG8) (Protein ETO) (Eight twenty one, protein) (Cyclin-D-related protein) (Zinc finger MYND domain-, containing protein 2).]                                                                                                               | Go Component not found |
| <b>Q13613</b> | Myotubularin-related protein 1 (EC 3.1.3.-).                                                                                                                                                                                                                          | Go Component not found |
| <b>Q02817</b> | Mucin-2 precursor (Intestinal mucin-2).                                                                                                                                                                                                                               | Go Component not found |
| <b>Q9UKN7</b> | Myosin-XV (Unconventional myosin-15).                                                                                                                                                                                                                                 | Go Component not found |
| <b>P11055</b> | [Myosin-3 (Myosin heavy chain 3) (Myosin heavy chain, fast skeletal, muscle, embryonic) (Muscle embryonic myosin heavy chain) (SMHCE).]                                                                                                                               | Go Component not found |
| <b>P54296</b> | [Myomesin-2 (M-protein) (165 kDa titin-associated protein) (165 kDa, connectin-associated protein).]                                                                                                                                                                  | Go Component not found |
| <b>Q15274</b> | [Nicotinate-nucleotide pyrophosphorylase [carboxylating] (EC 2.4.2.19), (Quinolate phosphoribosyltransferase [decarboxylating]) (QAPRTase), (QPRTase).]                                                                                                               | Go Component not found |
| <b>Q9Y2A7</b> | [Nck-associated protein 1 (NAP 1) (p125Nap1) (Membrane-associated, protein HEM-2).]                                                                                                                                                                                   | Go Component not found |
| <b>P62166</b> | [Neuronal calcium sensor 1 (NCS-1) (Frequenin homolog) (Frequenin-like, protein) (Frequenin-like ubiquitous protein).]                                                                                                                                                | Go Component not found |
| <b>Q9ULJ8</b> | [Neurabin-1 (Neurabin-I) (Neural tissue-specific F-actin-binding, protein I) (Protein phosphatase 1 regulatory subunit 9A).]                                                                                                                                          | Go Component not found |
| <b>Q92832</b> | [Protein kinase C-binding protein NELL1 precursor (NEL-like protein 1), (Nel-related protein 1).]                                                                                                                                                                     | Go Component not found |
| <b>P56730</b> | [Neurotrypsin precursor (EC 3.4.21.-) (Serine protease 12) (Motopsin), (Leydin).]                                                                                                                                                                                     | Go Component not found |
| <b>Q14934</b> | [Nuclear factor of activated T-cells, cytoplasmic 4 (NF-ATc4) (NFATc4), (T-cell transcription factor NFAT3) (NF-AT3).]                                                                                                                                                | Go Component not found |
| <b>P08651</b> | [Nuclear factor 1 C-type (Nuclear factor 1/C) (NF1-C) (NFI-C) (NF-I/C), (CCAAT-box-binding transcription factor) (CTF) (TGGCA-binding, protein).]                                                                                                                     | Go Component not found |
| <b>Q14494</b> | [Nuclear factor erythroid 2-related factor 1 (NF-E2-related factor 1), (NFE2-related factor 1) (Nuclear factor, erythroid derived 2, like 1), (Transcription factor 11) (Transcription factor HBZ17) (Transcription, factor LCR-F1) (Locus control region-factor 1).] | Go Component not found |
| <b>Q99742</b> | [Neuronal PAS domain-containing protein 1 (Neuronal PAS1) (Member of, PAS protein 5) (Basic-helix-loop-helix-PAS protein MOP5).]                                                                                                                                      | Go Component not found |
| <b>P61916</b> | [Epididymal secretory protein E1 precursor (Niemann-Pick disease type, C2 protein) (hE1).]                                                                                                                                                                            | Go Component not found |
| <b>P47972</b> | Neuronal pentraxin-2 precursor (NP2) (Neuronal pentraxin II) (NP-II).                                                                                                                                                                                                 | Go Component not found |

|               |                                                                                                                                                                                                                                                                                                                           |                        |
|---------------|---------------------------------------------------------------------------------------------------------------------------------------------------------------------------------------------------------------------------------------------------------------------------------------------------------------------------|------------------------|
| <b>O14786</b> | [Neuropilin-1 precursor (Vascular endothelial cell growth factor 165, receptor) (CD304 antigen).]                                                                                                                                                                                                                         | Go Component not found |
| <b>Q9BS92</b> | Protein NipSnap3B (SNAP1).                                                                                                                                                                                                                                                                                                | Go Component not found |
| <b>Q14249</b> | Endonuclease G, mitochondrial precursor (EC 3.1.30.-) (Endo G).                                                                                                                                                                                                                                                           | Go Component not found |
| <b>P53370</b> | [Nucleoside diphosphate-linked moiety X motif 6 (Nudix motif 6), (Protein GFG) (GFG-1) (Antisense basic fibroblast growth factor).]                                                                                                                                                                                       | Go Component not found |
| <b>Q9P2S2</b> | Neurexin-2-alpha precursor (Neurexin II-alpha).                                                                                                                                                                                                                                                                           | Go Component not found |
| <b>Q13606</b> | [Olfactory receptor 5I1 (Olfactory receptor OR11-159) (Olfactory, receptor-like protein OLF1).]                                                                                                                                                                                                                           | Go Component not found |
| <b>Q16633</b> | [POU domain class 2-associating factor 1 (B-cell-specific coactivator, OBF-1) (OCT-binding factor 1) (BOB-1) (OCA-B).]                                                                                                                                                                                                    | Go Component not found |
| <b>Q02218</b> | [2-oxoglutarate dehydrogenase E1 component, mitochondrial precursor, (EC 1.2.4.2) (Alpha-ketoglutarate dehydrogenase).]                                                                                                                                                                                                   | Go Component not found |
| <b>O94826</b> | [Mitochondrial precursor proteins import receptor (Translocase of outer, membrane TOM70).]                                                                                                                                                                                                                                | Go Component not found |
| <b>Q9NRC9</b> | [Otoraplin precursor (Fibrocyte-derived protein) (Melanoma inhibitory, activity-like protein).]                                                                                                                                                                                                                           | Go Component not found |
| <b>Q10472</b> | [Polypeptide N-acetylgalactosaminyltransferase 1 (EC 2.4.1.41), (Protein-UDP acetylgalactosaminyltransferase 1) (UDP-, GalNAc:polypeptide N-acetylgalactosaminyltransferase 1) (Polypeptide, GalNAc transferase 1) (GalNAc-T1) (pp-GaNTase 1) [Contains:, Polypeptide N-acetylgalactosaminyltransferase 1 soluble form].] | Go Component not found |
| <b>P15863</b> | Paired box protein Pax-1 (HUP48).                                                                                                                                                                                                                                                                                         | Go Component not found |
| <b>P23759</b> | Paired box protein Pax-7 (HUP1).                                                                                                                                                                                                                                                                                          | Go Component not found |
| <b>P40425</b> | [Pre-B-cell leukemia transcription factor 2 (Homeobox protein PBX2), (Protein G17).]                                                                                                                                                                                                                                      | Go Component not found |
| <b>Q15113</b> | [Procollagen C-endopeptidase enhancer 1 precursor (Procollagen COOH-, terminal proteinase enhancer 1) (Procollagen C-proteinase enhancer 1), (PCPE-1) (Type I procollagen COOH-terminal proteinase enhancer) (Type, 1 procollagen C-proteinase enhancer protein).]                                                        | Go Component not found |
| <b>Q9ULC6</b> | [Protein-arginine deiminase type-1 (EC 3.5.3.15) (Protein-arginine, deiminase type I) (Peptidylarginine deiminase I).]                                                                                                                                                                                                    | Go Component not found |
| <b>O15534</b> | [Period circadian protein homolog 1 (Circadian clock protein PERIOD 1), (Circadian pacemaker protein Rigi) (hPER1).]                                                                                                                                                                                                      | Go Component not found |
| <b>P98160</b> | [Basement membrane-specific heparan sulfate proteoglycan core protein, precursor (HSPG) (Perlecan) (PLC).]                                                                                                                                                                                                                | Go Component not found |
| <b>P07585</b> | Decorin precursor (Bone proteoglycan II) (PG-S2) (PG40).                                                                                                                                                                                                                                                                  | Go Component not found |
| <b>P06737</b> | Glycogen phosphorylase, liver form (EC 2.4.1.1).                                                                                                                                                                                                                                                                          | Go Component not found |



|               |                                                                                                                                                                                      |                        |
|---------------|--------------------------------------------------------------------------------------------------------------------------------------------------------------------------------------|------------------------|
| <b>Q9UHT4</b> | Putative protein PRO1854.                                                                                                                                                            | Go Component not found |
| <b>P07738</b> | [Bisphosphoglycerate mutase (EC 5.4.2.4) (2,3-bisphosphoglycerate, mutase, erythrocyte) (2,3-bisphosphoglycerate synthase) (BPGM), (EC 5.4.2.1) (EC 3.1.3.13) (BPG-dependent PGAM).] | Go Component not found |
| <b>P00491</b> | [Purine nucleoside phosphorylase (EC 2.4.2.1) (Inosine phosphorylase), (PNP).]                                                                                                       | Go Component not found |
| <b>Q15165</b> | [Serum paraoxonase/arylesterase 2 (EC 3.1.1.2) (EC 3.1.8.1) (PON 2), (Serum aryldialkylphosphatase 2) (A-esterase 2) (Aromatic esterase 2).]                                         | Go Component not found |
| <b>Q9NQV6</b> | PR domain zinc finger protein 10 (PR domain-containing protein 10).                                                                                                                  | Go Component not found |
| <b>P49643</b> | [DNA primase large subunit (EC 2.7.7.-) (DNA primase 58 kDa subunit), (p58).]                                                                                                        | Go Component not found |
| <b>Q99935</b> | [Proline-rich protein 1 precursor (PRL1) (Basic proline-rich lacrimal, protein).]                                                                                                    | Go Component not found |
| <b>P07737</b> | Profilin-1 (Profilin I).                                                                                                                                                             | Go Component not found |
| <b>P22891</b> | Vitamin K-dependent protein Z precursor.                                                                                                                                             | Go Component not found |
| <b>Q6S8J3</b> | Prostate, ovary, testis-expressed protein on chromosome 2 (Fragment).                                                                                                                | Go Component not found |
| <b>P26045</b> | [Tyrosine-protein phosphatase non-receptor type 3 (EC 3.1.3.48), (Protein-tyrosine phosphatase H1) (PTP-H1).]                                                                        | Go Component not found |
| <b>P27708</b> | [CAD protein [Includes: Glutamine-dependent carbamoyl-phosphate, synthase (EC 6.3.5.5); Aspartate carbamoyltransferase (EC 2.1.3.2);, Dihydroorotase (EC 3.5.2.3)].]                 | Go Component not found |
| <b>P54725</b> | UV excision repair protein RAD23 homolog A (hHR23A).                                                                                                                                 | Go Component not found |
| <b>P55042</b> | GTP-binding protein RAD (RAS associated with diabetes) (RAD1).                                                                                                                       | Go Component not found |
| <b>Q13702</b> | [43 kDa receptor-associated protein of the synapse (RAPsyn), (Acetylcholine receptor-associated 43 kDa protein) (43 kDa, postsynaptic protein) (RING finger protein 205).]           | Go Component not found |
| <b>Q13636</b> | Ras-related protein Rab-31 (Rab-22B).                                                                                                                                                | Go Component not found |
| <b>P51148</b> | Ras-related protein Rab-5C (RAB5L) (L1880).                                                                                                                                          | Go Component not found |
| <b>P98179</b> | Putative RNA-binding protein 3 (RNA-binding motif protein 3) (RNPL).                                                                                                                 | Go Component not found |
| <b>Q9NZL6</b> | Ral guanine nucleotide dissociation stimulator-like 1 (RalGDS-like 1).                                                                                                               | Go Component not found |
| <b>P49802</b> | Regulator of G-protein signaling 7 (RGS7).                                                                                                                                           | Go Component not found |
| <b>Q15835</b> | [Rhodopsin kinase precursor (EC 2.7.11.14) (RK) (G protein-coupled, receptor kinase 1).]                                                                                             | Go Component not found |

|               |                                                                                                                                                                                             |                        |
|---------------|---------------------------------------------------------------------------------------------------------------------------------------------------------------------------------------------|------------------------|
| <b>P83111</b> | [Serine beta-lactamase-like protein LACTB, mitochondrial precursor, (EC 3.4.-.-).]                                                                                                          | Go Component not found |
| <b>P35398</b> | [Nuclear receptor ROR-alpha (Retinoid-related orphan receptor-alpha), (Nuclear receptor RZR-alpha).]                                                                                        | Go Component not found |
| <b>Q92766</b> | [RAS-responsive element-binding protein 1 (RREB-1) (Raf-responsive zinc, finger protein LZ321) (Zinc finger motif-enhancer binding-protein 1), (Zep-1) (Finger protein in nuclear bodies).] | Go Component not found |
| <b>Q9UET6</b> | [Putative ribosomal RNA methyltransferase 1 (EC 2.1.1.-) (rRNA, (uridine-2'-O-)-methyltransferase).]                                                                                        | Go Component not found |
| <b>Q92545</b> | Transmembrane protein 131 (Protein RW1).                                                                                                                                                    | Go Component not found |
| <b>P61619</b> | [Protein transport protein Sec61 subunit alpha isoform 1 (Sec61 alpha-, 1).]                                                                                                                | Go Component not found |
| <b>Q13228</b> | Selenium-binding protein 1 (56 kDa selenium-binding protein) (SP56).                                                                                                                        | Go Component not found |
| <b>Q14141</b> | Septin-6.                                                                                                                                                                                   | Go Component not found |
| <b>Q13247</b> | [Splicing factor, arginine/serine-rich 6 (Pre-mRNA-splicing factor, SRP55).]                                                                                                                | Go Component not found |
| <b>P05060</b> | [Secretogranin-1 precursor (Secretogranin I) (Sgl) (Chromogranin-B), (CgB) [Contains: GAWK peptide; CCB peptide].]                                                                          | Go Component not found |
| <b>P81133</b> | Single-minded homolog 1.                                                                                                                                                                    | Go Component not found |
| <b>Q13591</b> | Semaphorin-5A precursor (Semaphorin F) (Sema F).                                                                                                                                            | Go Component not found |
| <b>O75326</b> | [Semaphorin-7A precursor (Semaphorin L) (Sema L) (Semaphorin K1) (Sema, K1) (John-Milton-Hargen human blood group Ag) (JMh blood group, antigen) (CD108 antigen) (CDw108).]                 | Go Component not found |
| <b>P41229</b> | [Histone demethylase JARID1C (EC 1.14.11.-) (Jumonji/ARID domain-, containing protein 1C) (Protein SmcX) (Protein Xe169).]                                                                  | Go Component not found |
| <b>Q9UNH6</b> | Sorting nexin-7.                                                                                                                                                                            | Go Component not found |
| <b>Q07890</b> | Son of sevenless homolog 2 (SOS-2).                                                                                                                                                         | Go Component not found |
| <b>Q9BY50</b> | [Signal peptidase complex catalytic subunit SEC11C (EC 3.4.-.-) (SEC11, homolog C) (SEC11-like protein 3) (Microsomal signal peptidase 21 kDa, subunit) (SPase 21 kDa subunit) (SPC21).]    | Go Component not found |
| <b>Q15513</b> | Protein SPHAR (S-phase response protein).                                                                                                                                                   | Go Component not found |
| <b>Q99611</b> | [Selenide, water dikinase 2 (EC 2.7.9.3) (Selenophosphate synthetase 2), (Selenium donor protein 2).]                                                                                       | Go Component not found |
| <b>Q9Y6E0</b> | [Serine/threonine-protein kinase 24 (EC 2.7.11.1) (STE20-like kinase, MST3) (MST-3) (Mammalian STE20-like protein kinase 3).]                                                               | Go Component not found |
| <b>Q9UN79</b> | [SOX-13 protein (Type 1 diabetes autoantigen ICA12) (Islet cell antigen, 12).]                                                                                                              | Go Component not found |

|               |                                                                                                                                                                                                                                                                 |                        |
|---------------|-----------------------------------------------------------------------------------------------------------------------------------------------------------------------------------------------------------------------------------------------------------------|------------------------|
| <b>Q15031</b> | [Probable leucyl-tRNA synthetase, mitochondrial precursor (EC 6.1.1.4), (Leucine--tRNA ligase) (LeuRS).]                                                                                                                                                        | Go Component not found |
| <b>P47897</b> | [Glutamyl-tRNA synthetase (EC 6.1.1.18) (Glutamine--tRNA ligase), (GlnRS).]                                                                                                                                                                                     | Go Component not found |
| <b>P52655</b> | [Transcription initiation factor IIA subunit 1 (General transcription, factor IIA1) (TFIIA-42) (TFIIAL) [Contains: Transcription initiation, factor IIA alpha chain (TFIIA p35 subunit); Transcription initiation, factor IIA beta chain (TFIIA p19 subunit)].] | Go Component not found |
| <b>O43657</b> | [Tetraspanin-6 (Tspan-6) (Transmembrane 4 superfamily member 6) (T245, protein) (Tetraspanin TM4-D) (A15 homolog).]                                                                                                                                             | Go Component not found |
| <b>O95359</b> | [Transforming acidic coiled-coil-containing protein 2 (Anti Zuai-1), (AZU-1).]                                                                                                                                                                                  | Go Component not found |
| <b>P17542</b> | [T-cell acute lymphocytic leukemia protein 1 (TAL-1) (Stem cell, protein) (T-cell leukemia/lymphoma protein 5).]                                                                                                                                                | Go Component not found |
| <b>Q92844</b> | [TRAF family member-associated NF-kappa-B activator (TRAF-interacting, protein) (I-TRAF).]                                                                                                                                                                      | Go Component not found |
| <b>P68367</b> | [Tubulin alpha-4A chain (Tubulin alpha-1 chain) (Alpha-tubulin 1), (Testis-specific alpha-tubulin).]                                                                                                                                                            | Go Component not found |
| <b>Q92526</b> | [T-complex protein 1 subunit zeta-2 (TCP-1-zeta-2) (CCT-zeta-2) (TCP-1-, zeta-like) (CCT-zeta-like) (Testis-specific Tcp20) (Testis-specific, protein TSA303).]                                                                                                 | Go Component not found |
| <b>P19532</b> | Transcription factor E3.                                                                                                                                                                                                                                        | Go Component not found |
| <b>Q99969</b> | [Retinoic acid receptor responder protein 2 precursor (Tazarotene-, induced gene 2 protein) (RAR-responsive protein TIG2).]                                                                                                                                     | Go Component not found |
| <b>Q07352</b> | [Butyrate response factor 1 (Protein TIS11B) (EGF-response factor 1), (ERF-1).]                                                                                                                                                                                 | Go Component not found |
| <b>P56847</b> | Protein TNG2.                                                                                                                                                                                                                                                   | Go Component not found |
| <b>P40225</b> | [Thrombopoietin precursor (Megakaryocyte colony-stimulating factor), (Myeloproliferative leukemia virus oncogene ligand) (C-mpl ligand), (ML) (Megakaryocyte growth and development factor) (MGDF).]                                                            | Go Component not found |
| <b>P13056</b> | Orphan nuclear receptor TR2 (Testicular receptor 2).                                                                                                                                                                                                            | Go Component not found |
| <b>O75962</b> | [Triple functional domain protein (EC 2.7.11.1) (PTPRF-interacting, protein).]                                                                                                                                                                                  | Go Component not found |
| <b>P45378</b> | [Troponin T, fast skeletal muscle (TnTf) (Fast skeletal muscle troponin, T) (fTnT) (Beta TnTF).]                                                                                                                                                                | Go Component not found |
| <b>Q99598</b> | Translin-associated protein X (Translin-associated factor X).                                                                                                                                                                                                   | Go Component not found |
| <b>P53804</b> | [Tetratricopeptide repeat protein 3 (TPR repeat protein 3) (TPR repeat, protein D) (RING finger protein 105).]                                                                                                                                                  | Go Component not found |
| <b>O60806</b> | [T-box transcription factor TBX19 (T-box protein 19) (T-box factor,, pituitary).]                                                                                                                                                                               | Go Component not found |
| <b>P29597</b> | Non-receptor tyrosine-protein kinase TYK2 (EC 2.7.10.2).                                                                                                                                                                                                        | Go Component not found |

|               |                                                                                                                                                                  |                        |
|---------------|------------------------------------------------------------------------------------------------------------------------------------------------------------------|------------------------|
| <b>P04818</b> | Thymidylate synthase (EC 2.1.1.45) (TS) (TSase).                                                                                                                 | Go Component not found |
| <b>O00762</b> | [Ubiquitin-conjugating enzyme E2 C (EC 6.3.2.19) (Ubiquitin-protein, ligase C) (Ubiquitin carrier protein C) (UbcH10).]                                          | Go Component not found |
| <b>O14978</b> | [Zinc finger protein 263 (Zinc finger protein FPM315) (Zinc finger, protein with KRAB and SCAN domains 12).]                                                     | Go Component not found |
| <b>O15015</b> | Zinc finger protein 646.                                                                                                                                         | Go Component not found |
| <b>O15027</b> | SEC16 homolog A.                                                                                                                                                 | Go Component not found |
| <b>O43301</b> | Heat shock 70 kDa protein 12A.                                                                                                                                   | Go Component not found |
| <b>O60299</b> | Uncharacterized protein KIAA0552.                                                                                                                                | Go Component not found |
| <b>O60813</b> | PRAME family member 11.                                                                                                                                          | Go Component not found |
| <b>O75069</b> | Transmembrane and coiled-coil domains protein 2 (Cerebral protein 11).                                                                                           | Go Component not found |
| <b>O75385</b> | [Serine/threonine-protein kinase ULK1 (EC 2.7.11.1) (Unc-51-like kinase, 1).]                                                                                    | Go Component not found |
| <b>O94889</b> | Kelch-like protein 18.                                                                                                                                           | Go Component not found |
| <b>O95409</b> | Zinc finger protein ZIC 2 (Zinc finger protein of the cerebellum 2).                                                                                             | Go Component not found |
| <b>O95522</b> | PRAME family member 12.                                                                                                                                          | Go Component not found |
| <b>O96014</b> | Protein Wnt-11 precursor.                                                                                                                                        | Go Component not found |
| <b>P15498</b> | Proto-oncogene vav.                                                                                                                                              | Go Component not found |
| <b>P78381</b> | [UDP-galactose translocator (UDP-galactose transporter) (UGT) (UDP-Gal-, Tr) (Solute carrier family 35 member A2).]                                              | Go Component not found |
| <b>Q12767</b> | Uncharacterized protein KIAA0195 (Transmembrane protein 94).                                                                                                     | Go Component not found |
| <b>Q14146</b> | Uncharacterized protein KIAA0133.                                                                                                                                | Go Component not found |
| <b>Q14694</b> | [Ubiquitin carboxyl-terminal hydrolase 10 (EC 3.1.2.15) (Ubiquitin, thioesterase 10) (Ubiquitin-specific-processing protease 10), (Deubiquitinating enzyme 10).] | Go Component not found |
| <b>Q15776</b> | [Zinc finger protein 192 (LD5-1) (Zinc finger protein with KRAB and, SCAN domains 8).]                                                                           | Go Component not found |
| <b>Q15928</b> | Zinc finger protein 141.                                                                                                                                         | Go Component not found |

|               |                                                                                                                                                                                                                                                                                                                                                                                                                                                                                                                         |                        |
|---------------|-------------------------------------------------------------------------------------------------------------------------------------------------------------------------------------------------------------------------------------------------------------------------------------------------------------------------------------------------------------------------------------------------------------------------------------------------------------------------------------------------------------------------|------------------------|
| <b>Q92610</b> | Zinc finger protein 592.                                                                                                                                                                                                                                                                                                                                                                                                                                                                                                | Go Component not found |
| <b>Q93073</b> | Uncharacterized protein KIAA0256.                                                                                                                                                                                                                                                                                                                                                                                                                                                                                       | Go Component not found |
| <b>Q9HC78</b> | [Zinc finger and BTB domain-containing protein 20 (Zinc finger protein, 288) (Dendritic-derived BTB/POZ zinc finger protein).]                                                                                                                                                                                                                                                                                                                                                                                          | Go Component not found |
| <b>Q9NY84</b> | Vascular non-inflammatory molecule 3 precursor (Vanin-3).                                                                                                                                                                                                                                                                                                                                                                                                                                                               | Go Component not found |
| <b>Q9NZL3</b> | [Zinc finger protein 224 (Zinc finger protein 27) (Zinc finger protein, 233) (Zinc finger protein 255) (Bone marrow zinc finger 2) (BMZF-2), (Zinc finger protein KOX22).]                                                                                                                                                                                                                                                                                                                                              | Go Component not found |
| <b>Q9UIE0</b> | Zinc finger protein 230 (Zinc finger protein FDZF2).                                                                                                                                                                                                                                                                                                                                                                                                                                                                    | Go Component not found |
| <b>Q9UK13</b> | Zinc finger protein 221.                                                                                                                                                                                                                                                                                                                                                                                                                                                                                                | Go Component not found |
| <b>Q9ULK2</b> | Ataxin-7-like protein 1 (Fragment).                                                                                                                                                                                                                                                                                                                                                                                                                                                                                     | Go Component not found |
| <b>Q9Y473</b> | Zinc finger protein 175 (Zinc finger protein OTK18).                                                                                                                                                                                                                                                                                                                                                                                                                                                                    | Go Component not found |
| <b>P98194</b> | [Calcium-transporting ATPase type 2C member 1 (EC 3.6.3.8) (ATPase 2C1), (ATP-dependent Ca(2+) pump PMR1).]                                                                                                                                                                                                                                                                                                                                                                                                             | Golgi                  |
| <b>P98194</b> | [Calcium-transporting ATPase type 2C member 1 (EC 3.6.3.8) (ATPase 2C1), (ATP-dependent Ca(2+) pump PMR1).]                                                                                                                                                                                                                                                                                                                                                                                                             | Golgi                  |
| <b>P45844</b> | [ATP-binding cassette sub-family G member 1 (White protein homolog), (ATP-binding cassette transporter 8).]                                                                                                                                                                                                                                                                                                                                                                                                             | Golgi                  |
| <b>P98194</b> | [Calcium-transporting ATPase type 2C member 1 (EC 3.6.3.8) (ATPase 2C1), (ATP-dependent Ca(2+) pump PMR1).]                                                                                                                                                                                                                                                                                                                                                                                                             | Golgi                  |
| <b>Q9UBV7</b> | [Beta-1,4-galactosyltransferase 7 (EC 2.4.1.-) (Beta-1,4-GalTase 7), (Beta4Gal-T7) (b4Gal-T7) (UDP-galactose:beta-N-acetylglucosamine beta-, 1,4-galactosyltransferase 7) (UDP-Gal:beta-GlcNAc beta-1,4-, galactosyltransferase 7) [Includes: Xylosylprotein 4-beta-, galactosyltransferase (EC 2.4.1.133) (UDP-galactose:beta-xylose beta-, 1,4-galactosyltransferase) (Xylosylprotein beta-1,4-, galactosyltransferase) (XGPT) (Proteoglycan UDP-galactose:beta-xylose, beta1,4-galactosyltransferase I) (XGalT-1)].] | Golgi                  |
| <b>P56750</b> | Claudin-17.                                                                                                                                                                                                                                                                                                                                                                                                                                                                                                             | Golgi                  |
| <b>P98174</b> | [FYVE, RhoGEF and PH domain-containing protein 1 (Faciogenital, dysplasia 1 protein) (Zinc finger FYVE domain-containing protein 3), (Rho/Rac guanine nucleotide exchange factor FGD1) (Rho/Rac GEF).]                                                                                                                                                                                                                                                                                                                  | Golgi                  |
| <b>P19526</b> | [Galactoside 2-alpha-L-fucosyltransferase 1 (EC 2.4.1.69) (GDP-L-, fucose:beta-D-galactoside 2-alpha-L-fucosyltransferase 1), (Alpha(1,2)FT 1) (Fucosyltransferase 1) (Blood group H alpha 2-, fucosyltransferase).]                                                                                                                                                                                                                                                                                                    | Golgi                  |
| <b>Q92538</b> | [Golgi-specific brefeldin A-resistance guanine nucleotide exchange, factor 1 (BFA-resistant GEF 1).]                                                                                                                                                                                                                                                                                                                                                                                                                    | Golgi                  |
| <b>Q13439</b> | [Golgin subfamily A member 4 (Trans-Golgi p230) (256 kDa golgin), (Golgin-245) (Protein 72.1).]                                                                                                                                                                                                                                                                                                                                                                                                                         | Golgi                  |
| <b>P31948</b> | [Stress-induced-phosphoprotein 1 (ST11) (Hsc70/Hsp90-organizing, protein) (Hop) (Transformation-sensitive protein IEF SSP 3521) (NY-, REN-11 antigen).]                                                                                                                                                                                                                                                                                                                                                                 | Golgi                  |
| <b>Q99550</b> | M-phase phosphoprotein 9.                                                                                                                                                                                                                                                                                                                                                                                                                                                                                               | Golgi                  |
| <b>Q01968</b> | [Inositol polyphosphate 5-phosphatase OCRL-1 (EC 3.1.3.36) (Lowe, oculocerebrorenal syndrome protein).]                                                                                                                                                                                                                                                                                                                                                                                                                 | Golgi                  |
| <b>Q16549</b> | [Proprotein convertase subtilisin/kexin type 7 precursor (EC 3.4.21.-), (Proprotein convertase PC7) (Subtilisin/kexin-like protease PC7), (Prohormone convertase PC7) (PC8) (hPC8) (Lymphoma proprotein, convertase).]                                                                                                                                                                                                                                                                                                  | Golgi                  |
| <b>Q9Y2D2</b> | [UDP-N-acetylglucosamine transporter (Golgi UDP-GlcNAc transporter), (Solute carrier family 35 member A3).]                                                                                                                                                                                                                                                                                                                                                                                                             | Golgi                  |

|               |                                                                                                                                                                                                                                                                 |           |
|---------------|-----------------------------------------------------------------------------------------------------------------------------------------------------------------------------------------------------------------------------------------------------------------|-----------|
| <b>P15144</b> | [Aminopeptidase N (EC 3.4.11.2) (hAPN) (Alanyl aminopeptidase), (Microsomal aminopeptidase) (Aminopeptidase M) (gp150) (Myeloid plasma, membrane glycoprotein CD13) (CD13 antigen).]                                                                            | Golgi     |
| <b>Q16394</b> | [Exostosin-1 (EC 2.4.1.224) (EC 2.4.1.225) (Glucuronosyl-N-, acetylglucosaminyl-proteoglycan/N-acetylglucosaminyl-proteoglycan 4-, alpha-N-acetylglucosaminyltransferase) (Putative tumor suppressor, protein EXT1) (Multiple exostoses protein 1).]            | Golgi     |
| <b>Q92896</b> | [Golgi apparatus protein 1 precursor (Golgi sialoglycoprotein MG-160), (E-selectin ligand 1) (ESL-1) (Cysteine-rich fibroblast growth factor, receptor) (CFR-1).]                                                                                               | Golgi     |
| <b>Q02818</b> | Nucleobindin-1 precursor (CALNUC).                                                                                                                                                                                                                              | Golgi     |
| <b>P42356</b> | [Phosphatidylinositol 4-kinase alpha (EC 2.7.1.67) (PI4-kinase alpha), (PtdIns-4-kinase alpha) (PI4K-alpha).]                                                                                                                                                   | Golgi     |
| <b>P49755</b> | [Transmembrane emp24 domain-containing protein 10 precursor, (Transmembrane protein Tmp21) (21 kDa transmembrane-trafficking, protein) (p24delta) (S3111125) (S311125) (Tmp-21-I).]                                                                             | Golgi     |
| <b>O60763</b> | [General vesicular transport factor p115 (Transcytosis-associated, protein) (TAP) (Vesicle docking protein).]                                                                                                                                                   | Golgi     |
| <b>P36406</b> | [GTP-binding protein ARD-1 (ADP-ribosylation factor domain-containing, protein 1) (Tripartite motif-containing protein 23) (RING finger, protein 46).]                                                                                                          | Golgi     |
| <b>P98194</b> | [Calcium-transporting ATPase type 2C member 1 (EC 3.6.3.8) (ATPase 2C1), (ATP-dependent Ca(2+) pump PMR1).]                                                                                                                                                     | Golgi     |
| <b>P22460</b> | [Potassium voltage-gated channel subfamily A member 5 (Voltage-gated, potassium channel subunit Kv1.5) (HK2) (HPCN1).]                                                                                                                                          | Golgi     |
| <b>P02751</b> | [Fibronectin precursor (FN) (Cold-insoluble globulin) (CIG) [Contains:, Ugl-Y1; Ugl-Y2; Ugl-Y3].]                                                                                                                                                               | Golgi     |
| <b>P09958</b> | [Furin precursor (EC 3.4.21.75) (Paired basic amino acid residue, cleaving enzyme) (PACE) (Dibasic-processing enzyme).]                                                                                                                                         | Golgi     |
| <b>Q9NZ52</b> | [ADP-ribosylation factor-binding protein GGA3 (Golgi-localized, gamma, ear-containing, ARF-binding protein 3).]                                                                                                                                                 | Golgi     |
| <b>Q09328</b> | [Alpha-1,6-mannosylglycoprotein 6-beta-N-acetylglucosaminyltransferase, A (EC 2.4.1.155) (Mannoside acetylglucosaminyltransferase 5) (Alpha-, mannoside beta-1,6-N-acetylglucosaminyltransferase) (N-, acetylglucosaminyl-transferase V) (GNT-V) (GlcNAc-T V).] | Golgi     |
| <b>P42858</b> | Huntingtin (Huntington disease protein) (HD protein).                                                                                                                                                                                                           | Golgi     |
| <b>P49641</b> | [Alpha-mannosidase IIx (EC 3.2.1.114) (Mannosyl-oligosaccharide 1,3-, 1,6-alpha-mannosidase) (MAN IIx) (Mannosidase alpha class 2A member, 2).]                                                                                                                 | Golgi     |
| <b>O15258</b> | Protein RER1.                                                                                                                                                                                                                                                   | Golgi     |
| <b>Q92834</b> | X-linked retinitis pigmentosa GTPase regulator.                                                                                                                                                                                                                 | Golgi     |
| <b>Q9Y2T2</b> | [AP-3 complex subunit mu-1 (Adapter-related protein complex 3 mu-1, subunit) (Mu-adaptin 3A) (AP-3 adapter complex mu3A subunit).]                                                                                                                              | Lysosomal |
| <b>P15848</b> | [Arylsulfatase B precursor (EC 3.1.6.12) (ASB) (N-acetylgalactosamine-, 4-sulfatase) (G4S).]                                                                                                                                                                    | Lysosomal |
| <b>P10253</b> | [Lysosomal alpha-glucosidase precursor (EC 3.2.1.20) (Acid maltase), (Aglucosidase alfa) [Contains: 76 kDa lysosomal alpha-glucosidase; 70, kDa lysosomal alpha-glucosidase].]                                                                                  | Lysosomal |
| <b>Q99519</b> | [Sialidase-1 precursor (EC 3.2.1.18) (Lysosomal sialidase) (N-acetyl-, alpha-neuraminidase 1) (Acetylneuraminyl hydrolase) (G9 sialidase).]                                                                                                                     | Lysosomal |
| <b>O14773</b> | [Tripeptidyl-peptidase 1 precursor (EC 3.4.14.9) (Tripeptidyl-peptidase, I) (TPP-1) (TPP-I) (Tripeptidyl aminopeptidase) (Lysosomal pepstatin, insensitive protease) (LPIC) (Cell growth-inhibiting gene 1 protein).]                                           | Lysosomal |
| <b>P54803</b> | [Galactocerebrosidase precursor (EC 3.2.1.46) (GALCERase), (Galactosylceramidase) (Galactosylceramide beta-galactosidase), (Galactocerebroside beta-galactosidase).]                                                                                            | Lysosomal |
| <b>Q9UHG3</b> | [Prenylcysteine oxidase 1 precursor (EC 1.8.3.5) (Prenylcysteine, lyase).]                                                                                                                                                                                      | Lysosomal |
| <b>P05164</b> | [Myeloperoxidase precursor (EC 1.11.1.7) (MPO) [Contains: 89 kDa, myeloperoxidase; 84 kDa myeloperoxidase; Myeloperoxidase light chain;, Myeloperoxidase heavy chain].]                                                                                         | Lysosomal |

|               |                                                                                                                                                                                                          |               |
|---------------|----------------------------------------------------------------------------------------------------------------------------------------------------------------------------------------------------------|---------------|
| <b>Q9UBX1</b> | Cathepsin F precursor (EC 3.4.22.41) (CATSF).                                                                                                                                                            | Lysosomal     |
| <b>P98164</b> | [Low-density lipoprotein receptor-related protein 2 precursor (Megalin), (Glycoprotein 330) (gp330).]                                                                                                    | Lysosomal     |
| <b>P17900</b> | [Ganglioside GM2 activator precursor (GM2-AP) (Cerebroside sulfate, activator protein) (Shingolipid activator protein 3) (SAP-3), [Contains: Ganglioside GM2 activator isoform short].]                  | Lysosomal     |
| <b>Q01085</b> | Nucleolysin TIAR (TIA-1-related protein).                                                                                                                                                                | Lysosomal     |
| <b>P12236</b> | [ADP/ATP translocase 3 (Adenine nucleotide translocator 2) (ANT 3), (ADP,ATP carrier protein 3) (Solute carrier family 25 member 6), (ADP,ATP carrier protein, isoform T2).]                             | Mitochondrial |
| <b>P10809</b> | [60 kDa heat shock protein, mitochondrial precursor (Hsp60) (60 kDa, chaperonin) (CPN60) (Heat shock protein 60) (HSP-60) (Mitochondrial, matrix protein P1) (P60 lymphocyte protein) (HuCHA60).]        | Mitochondrial |
| <b>O76031</b> | [ATP-dependent Clp protease ATP-binding subunit clpX-like,, mitochondrial precursor.]                                                                                                                    | Mitochondrial |
| <b>Q9Y6N1</b> | Cytochrome c oxidase assembly protein COX11, mitochondrial precursor.                                                                                                                                    | Mitochondrial |
| <b>Q92523</b> | [Carnitine O-palmitoyltransferase I, muscle isoform (EC 2.3.1.21) (CPT, I) (CPTI-M) (Carnitine palmitoyltransferase 1B) (Carnitine, palmitoyltransferase I-like protein).]                               | Mitochondrial |
| <b>P21912</b> | [Succinate dehydrogenase [ubiquinone] iron-sulfur subunit,, mitochondrial precursor (EC 1.3.5.1) (Ip) (Iron-sulfur subunit of, complex II).]                                                             | Mitochondrial |
| <b>P38117</b> | Electron transfer flavoprotein subunit beta (Beta-ETF).                                                                                                                                                  | Mitochondrial |
| <b>P48728</b> | [Aminomethyltransferase, mitochondrial precursor (EC 2.1.2.10) (Glycine, cleavage system T protein) (GCVT).]                                                                                             | Mitochondrial |
| <b>Q9UI32</b> | [Glutaminase liver isoform, mitochondrial precursor (EC 3.5.1.2) (GLS), (L-glutamine amidohydrolase) (L-glutaminase).]                                                                                   | Mitochondrial |
| <b>P36969</b> | [Phospholipid hydroperoxide glutathione peroxidase, mitochondrial, precursor (EC 1.11.1.12) (PHGPx) (GPX-4).]                                                                                            | Mitochondrial |
| <b>P22557</b> | [5-aminolevulinic acid synthase, erythroid-specific, mitochondrial, precursor (EC 2.3.1.37) (5-aminolevulinic acid synthase) (Delta-, aminolevulinic acid synthase) (Delta-ALA synthetase) (ALAS-E).]    | Mitochondrial |
| <b>P54868</b> | [Hydroxymethylglutaryl-CoA synthase, mitochondrial precursor, (EC 2.3.3.10) (HMG-CoA synthase) (3-hydroxy-3-methylglutaryl coenzyme, A synthase).]                                                       | Mitochondrial |
| <b>P12532</b> | [Creatine kinase, ubiquitous mitochondrial precursor (EC 2.7.3.2) (U-, MtCK) (Mia-CK) (Acidic-type mitochondrial creatine kinase).]                                                                      | Mitochondrial |
| <b>Q02252</b> | [Methylmalonate-semialdehyde dehydrogenase [acylating], mitochondrial, precursor (EC 1.2.1.27) (MMSDH) (Malonate-semialdehyde dehydrogenase, [acylating]) (EC 1.2.1.18).]                                | Mitochondrial |
| <b>P22033</b> | [Methylmalonyl-CoA mutase, mitochondrial precursor (EC 5.4.99.2) (MCM), (Methylmalonyl-CoA isomerase).]                                                                                                  | Mitochondrial |
| <b>P03923</b> | [NADH-ubiquinone oxidoreductase chain 6 (EC 1.6.5.3) (NADH, dehydrogenase subunit 6).]                                                                                                                   | Mitochondrial |
| <b>O00217</b> | [NADH dehydrogenase [ubiquinone] iron-sulfur protein 8, mitochondrial, precursor (EC 1.6.5.3) (EC 1.6.99.3) (NADH-ubiquinone oxidoreductase, 23 kDa subunit) (Complex I-23kD) (CI-23kD) (TYKY subunit).] | Mitochondrial |
| <b>P51970</b> | [NADH dehydrogenase [ubiquinone] 1 alpha subcomplex subunit 8, (EC 1.6.5.3) (EC 1.6.99.3) (NADH-ubiquinone oxidoreductase 19 kDa, subunit) (Complex I-19kD) (CI-19kD) (Complex I-PGIV) (CI-PGIV).]       | Mitochondrial |
| <b>P49753</b> | [Acyl-coenzyme A thioesterase 2, mitochondrial precursor (EC 3.1.2.2), (Acyl-CoA thioesterase 2) (Acyl-coenzyme A thioester hydrolase 2a), (Long-chain acyl-coA thioesterase 2) (ZAP128) (CTE-Ia).]      | Mitochondrial |
| <b>O00411</b> | [DNA-directed RNA polymerase, mitochondrial precursor (EC 2.7.7.6), (MtRPOL).]                                                                                                                           | Mitochondrial |
| <b>P82650</b> | Mitochondrial 28S ribosomal protein S22 (S22mt) (MRP-S22).                                                                                                                                               | Mitochondrial |
| <b>P55851</b> | Mitochondrial uncoupling protein 2 (UCP 2) (UCPH).                                                                                                                                                       | Mitochondrial |
| <b>Q9Y4W6</b> | AFG3-like protein 2 (EC 3.4.24.-) (Paraplegin-like protein).                                                                                                                                             | Mitochondrial |
| <b>P25705</b> | ATP synthase subunit alpha, mitochondrial precursor (EC 3.6.3.14).                                                                                                                                       | Mitochondrial |

|               |                                                                                                                                                                                                                                                      |               |
|---------------|------------------------------------------------------------------------------------------------------------------------------------------------------------------------------------------------------------------------------------------------------|---------------|
| <b>P11586</b> | [C-1-tetrahydrofolate synthase, cytoplasmic (C1-THF synthase), [Includes: Methylenetetrahydrofolate dehydrogenase (EC 1.5.1.5);, Methenyltetrahydrofolate cyclohydrolase (EC 3.5.4.9);, Formyltetrahydrofolate synthetase (EC 6.3.4.3)].]            | Mitochondrial |
| <b>P31327</b> | [Carbamoyl-phosphate synthase [ammonia], mitochondrial precursor, (EC 6.3.4.16) (Carbamoyl-phosphate synthetase I) (CPSase I).]                                                                                                                      | Mitochondrial |
| <b>P30084</b> | [Enoyl-CoA hydratase, mitochondrial precursor (EC 4.2.1.17) (Short, chain enoyl-CoA hydratase) (SCEH) (Enoyl-CoA hydratase 1).]                                                                                                                      | Mitochondrial |
| <b>P34897</b> | [Serine hydroxymethyltransferase, mitochondrial precursor (EC 2.1.2.1), (Serine methylase) (Glycine hydroxymethyltransferase) (SHMT).]                                                                                                               | Mitochondrial |
| <b>Q16836</b> | [Hydroxyacyl-coenzyme A dehydrogenase, mitochondrial precursor, (EC 1.1.1.35) (Short chain 3-hydroxyacyl-CoA dehydrogenase) (HCDH), (Medium and short chain L-3-hydroxyacyl-coenzyme A dehydrogenase).]                                              | Mitochondrial |
| <b>P36551</b> | [Coproporphyrinogen III oxidase, mitochondrial precursor (EC 1.3.3.3), (Coproporphyrinogenase) (Coprogen oxidase) (COX).]                                                                                                                            | Mitochondrial |
| <b>P52789</b> | [Hexokinase-2 (EC 2.7.1.1) (Hexokinase type II) (HK II) (Muscle form, hexokinase).]                                                                                                                                                                  | Mitochondrial |
| <b>P46199</b> | [Translation initiation factor IF-2, mitochondrial precursor (IF-2Mt), (IF2(mt)) (IF-2(Mt)).]                                                                                                                                                        | Mitochondrial |
| <b>Q10713</b> | [Mitochondrial-processing peptidase alpha subunit, mitochondrial, precursor (EC 3.4.24.64) (Alpha-MPP) (P-55).]                                                                                                                                      | Mitochondrial |
| <b>O75431</b> | Metaxin-2.                                                                                                                                                                                                                                           | Mitochondrial |
| <b>O95182</b> | [NADH dehydrogenase [ubiquinone] 1 alpha subcomplex subunit 7, (EC 1.6.5.3) (EC 1.6.99.3) (NADH-ubiquinone oxidoreductase subunit, B14.5a) (Complex I-B14.5a) (CI-B14.5a).]                                                                          | Mitochondrial |
| <b>O15239</b> | [NADH dehydrogenase [ubiquinone] 1 alpha subcomplex subunit 1, (EC 1.6.5.3) (EC 1.6.99.3) (NADH-ubiquinone oxidoreductase MWFE, subunit) (Complex I-MWFE) (CI-MWFE).]                                                                                | Mitochondrial |
| <b>O75306</b> | [NADH dehydrogenase [ubiquinone] iron-sulfur protein 2, mitochondrial, precursor (EC 1.6.5.3) (EC 1.6.99.3) (NADH-ubiquinone oxidoreductase, 49 kDa subunit) (Complex I-49kD) (CI-49kD).]                                                            | Mitochondrial |
| <b>PO4181</b> | [Ornithine aminotransferase, mitochondrial precursor (EC 2.6.1.13), (Ornithine--oxo-acid aminotransferase) [Contains: Ornithine, aminotransferase, hepatic form; Ornithine aminotransferase, renal, form].]                                          | Mitochondrial |
| <b>Q9UQ90</b> | Paraplegin (EC 3.4.24.-) (Spastic paraplegia protein 7).                                                                                                                                                                                             | Mitochondrial |
| <b>P51649</b> | [Succinate semialdehyde dehydrogenase, mitochondrial precursor, (EC 1.2.1.24) (NAD(+)-dependent succinic semialdehyde dehydrogenase), (Aldehyde dehydrogenase family 5 member A1).]                                                                  | Mitochondrial |
| <b>O95847</b> | [Mitochondrial uncoupling protein 4 (UCP 4) (Solute carrier family 25, member 27).]                                                                                                                                                                  | Mitochondrial |
| <b>P45954</b> | [Short/branched chain specific acyl-CoA dehydrogenase, mitochondrial, precursor (EC 1.3.99.-) (SBCAD) (2-methyl branched chain acyl-CoA, dehydrogenase) (2-MEBCAD) (2-methylbutyryl-coenzyme A dehydrogenase), (2-methylbutyryl-CoA dehydrogenase).] | Mitochondrial |
| <b>Q99798</b> | [Aconitate hydratase, mitochondrial precursor (EC 4.2.1.3) (Citrate, hydro-lyase) (Aconitase).]                                                                                                                                                      | Mitochondrial |
| <b>Q9UHK6</b> | [Alpha-methylacyl-CoA racemase (EC 5.1.99.4) (2-methylacyl-CoA, racemase).]                                                                                                                                                                          | Mitochondrial |
| <b>O14874</b> | [[[3-methyl-2-oxobutanoate dehydrogenase [lipoamide]] kinase, mitochondrial precursor (EC 2.7.11.4) (Branched-chain alpha-ketoacid, dehydrogenase kinase) (BCKDHKIN) (BCKD-kinase).]                                                                 | Mitochondrial |
| <b>Q9Y305</b> | [Acyl-coenzyme A thioesterase 9 (EC 3.1.2.-) (Acyl-CoA thioesterase 9), (Acyl-CoA thioester hydrolase 9).]                                                                                                                                           | Mitochondrial |
| <b>Q12887</b> | [Protoheme IX farnesyltransferase, mitochondrial precursor (EC 2.5.1.-), (Heme O synthase).]                                                                                                                                                         | Mitochondrial |
| <b>Q16854</b> | Deoxyguanosine kinase, mitochondrial precursor (EC 2.7.1.113) (dGK).                                                                                                                                                                                 | Mitochondrial |
| <b>P54098</b> | [DNA polymerase subunit gamma-1 (EC 2.7.7.7) (Mitochondrial DNA, polymerase catalytic subunit) (PolG-alpha).]                                                                                                                                        | Mitochondrial |
| <b>O75879</b> | [Probable glutamyl-tRNA(Gln) amidotransferase subunit B, mitochondrial, precursor (EC 6.3.5.-) (Glu-ADT subunit B) (Cytochrome oxidase, assembly factor PET112 homolog).]                                                                            | Mitochondrial |
| <b>Q92947</b> | [Glutaryl-CoA dehydrogenase, mitochondrial precursor (EC 1.3.99.7), (GCD).]                                                                                                                                                                          | Mitochondrial |
| <b>P17540</b> | [Creatine kinase, sarcomeric mitochondrial precursor (EC 2.7.3.2) (S-, MtCK) (Mib-CK) (Basic-type mitochondrial creatine kinase).]                                                                                                                   | Mitochondrial |
| <b>PO4049</b> | [RAF proto-oncogene serine/threonine-protein kinase (EC 2.7.11.1) (Raf-, 1) (C-RAF) (cRaf).]                                                                                                                                                         | Mitochondrial |



|               |                                                                                                                                                                                                                                                      |               |
|---------------|------------------------------------------------------------------------------------------------------------------------------------------------------------------------------------------------------------------------------------------------------|---------------|
| <b>O43678</b> | [NADH dehydrogenase [ubiquinone] 1 alpha subcomplex subunit 2, (EC 1.6.5.3) (EC 1.6.99.3) (NADH-ubiquinone oxidoreductase B8 subunit), (Complex I-B8) (CI-B8).]                                                                                      | Mitochondrial |
| <b>Q16822</b> | [Phosphoenolpyruvate carboxykinase [GTP], mitochondrial precursor, (EC 4.1.1.32) (Phosphoenolpyruvate carboxylase) (PEPCK-M).]                                                                                                                       | Mitochondrial |
| <b>O75570</b> | Peptide chain release factor 1, mitochondrial precursor (MRF-1).                                                                                                                                                                                     | Mitochondrial |
| <b>P82914</b> | 28S ribosomal protein S15, mitochondrial precursor (S15mt) (MRP-S15).                                                                                                                                                                                | Mitochondrial |
| <b>P22695</b> | [Ubiquinol-cytochrome-c reductase complex core protein 2, mitochondrial, precursor (EC 1.10.2.2) (Core protein II) (Complex III subunit II).]                                                                                                        | Mitochondrial |
| <b>Q16352</b> | [Alpha-interneixin (Alpha-Inx) (66 kDa neurofilament protein), (Neurofilament-66) (NF-66).]                                                                                                                                                          | Neural        |
| <b>O43497</b> | [Voltage-dependent T-type calcium channel subunit alpha-1G (Voltage-, gated calcium channel subunit alpha Cav3.1) (Cav3.1c) (NBR13).]                                                                                                                | Neural        |
| <b>Q00535</b> | [Cell division protein kinase 5 (EC 2.7.11.22) (Cyclin-dependent kinase, 5) (Tau protein kinase II catalytic subunit) (TPKII catalytic subunit), (Serine/threonine-protein kinase PSSALRE).]                                                         | Neural        |
| <b>Q9NYC9</b> | Ciliary dynein heavy chain 9 (Axonemal beta dynein heavy chain 9).                                                                                                                                                                                   | Neural        |
| <b>P48549</b> | [G protein-activated inward rectifier potassium channel 1 (GIRK1), (Potassium channel, inwardly rectifying subfamily J member 3) (Inward, rectifier K(+) channel Kir3.1).]                                                                           | Neural        |
| <b>P21359</b> | [Neurofibromin (Neurofibromatosis-related protein NF-1) [Contains:, Neurofibromin truncated].]                                                                                                                                                       | Neural        |
| <b>Q01668</b> | [Voltage-dependent L-type calcium channel subunit alpha-1D (Voltage-, gated calcium channel subunit alpha Cav1.3) (Calcium channel, L type,, alpha-1 polypeptide, isoform 2).]                                                                       | Neural        |
| <b>Q13698</b> | [Voltage-dependent L-type calcium channel subunit alpha-1S (Voltage-, gated calcium channel subunit alpha Cav1.1) (Calcium channel, L type,, alpha-1 polypeptide, isoform 3, skeletal muscle).]                                                      | Neural        |
| <b>Q09470</b> | [Potassium voltage-gated channel subfamily A member 1 (Voltage-gated, potassium channel subunit Kv1.1) (HUKI) (HBK1).]                                                                                                                               | Neural        |
| <b>P48048</b> | [ATP-sensitive inward rectifier potassium channel 1 (Potassium channel,, inwardly rectifying subfamily J member 1) (ATP-regulated potassium, channel ROM-K) (Kir1.1).]                                                                               | Neural        |
| <b>P12036</b> | [Neurofilament heavy polypeptide (NF-H) (Neurofilament triplet H, protein) (200 kDa neurofilament protein).]                                                                                                                                         | Neural        |
| <b>P07196</b> | [Neurofilament light polypeptide (NF-L) (Neurofilament triplet L, protein) (68 kDa neurofilament protein).]                                                                                                                                          | Neural        |
| <b>P07197</b> | [Neurofilament medium polypeptide (NF-M) (Neurofilament triplet M, protein) (160 kDa neurofilament protein) (Neurofilament 3).]                                                                                                                      | Neural        |
| <b>Q00975</b> | [Voltage-dependent N-type calcium channel subunit alpha-1B (Voltage-, gated calcium channel subunit alpha Cav2.2) (Calcium channel, L type,, alpha-1 polypeptide isoform 5) (Brain calcium channel III) (BIII).]                                     | Neural        |
| <b>Q9Y698</b> | [Voltage-dependent calcium channel gamma-2 subunit (Neuronal voltage-, gated calcium channel gamma-2 subunit).]                                                                                                                                      | Neural        |
| <b>P54289</b> | [Voltage-dependent calcium channel subunit alpha-2/delta-1 precursor, (Voltage-gated calcium channel subunit alpha-2/delta-1) [Contains:, Voltage-dependent calcium channel subunit alpha-2-1; Voltage-dependent, calcium channel subunit delta-1].] | Neural        |
| <b>O43525</b> | [Potassium voltage-gated channel subfamily KQT member 3 (Voltage-gated, potassium channel subunit Kv7.3) (Potassium channel subunit alpha, KvLQT3) (KQT-like 3).]                                                                                    | Neural        |
| <b>Q9H2C0</b> | Gigaxonin (Kelch-like protein 16).                                                                                                                                                                                                                   | Neural        |
| <b>O60928</b> | [Inward rectifier potassium channel 13 (Potassium channel, inwardly, rectifying subfamily J member 13) (Inward rectifier K(+) channel, Kir7.1).]                                                                                                     | Neural        |
| <b>P10636</b> | [Microtubule-associated protein tau (Neurofibrillary tangle protein), (Paired helical filament-tau) (PHF-tau).]                                                                                                                                      | Neural        |
| <b>P61812</b> | [Transforming growth factor beta-2 precursor (TGF-beta-2), (Glioblastoma-derived T-cell suppressor factor) (G-TSF) (BSC-1 cell, growth inhibitor) (Polyergin) (Cetermin).]                                                                           | Neural        |

|               |                                                                                                                                                                                                                                                                                                                        |         |
|---------------|------------------------------------------------------------------------------------------------------------------------------------------------------------------------------------------------------------------------------------------------------------------------------------------------------------------------|---------|
| <b>Q9Y6J0</b> | Calcineurin-binding protein Cabin 1 (Calcineurin inhibitor) (CAIN).                                                                                                                                                                                                                                                    | Nuclear |
| <b>P46087</b> | [Putative RNA methyltransferase NOL1 (EC 2.1.1.-) (Proliferating-cell, nucleolar antigen p120) (Proliferation-associated nucleolar protein, p120).]                                                                                                                                                                    | Nuclear |
| <b>Q9Y6J0</b> | Calcineurin-binding protein Cabin 1 (Calcineurin inhibitor) (CAIN).                                                                                                                                                                                                                                                    | Nuclear |
| <b>P46087</b> | [Putative RNA methyltransferase NOL1 (EC 2.1.1.-) (Proliferating-cell, nucleolar antigen p120) (Proliferation-associated nucleolar protein, p120).]                                                                                                                                                                    | Nuclear |
| <b>Q9Y2G3</b> | [Probable phospholipid-transporting ATPase IF (EC 3.6.3.1) (ATPase, class I type 11B) (ATPase IR).]                                                                                                                                                                                                                    | Nuclear |
| <b>Q09666</b> | [Neuroblast differentiation-associated protein AHNAK (Desmoyokin), (Fragments).]                                                                                                                                                                                                                                       | Nuclear |
| <b>Q13023</b> | [A-kinase anchor protein 6 (Protein kinase A-anchoring protein 6), (PRKA6) (A-kinase anchor protein 100 kDa) (AKAP 100) (mAKAP).]                                                                                                                                                                                      | Nuclear |
| <b>P05549</b> | [Transcription factor AP-2 alpha (AP2-alpha) (Activating enhancer-, binding protein 2 alpha) (AP-2 transcription factor) (Activator, protein 2) (AP-2).]                                                                                                                                                               | Nuclear |
| <b>P56559</b> | [ADP-ribosylation factor-like protein 4C (ADP-ribosylation factor-like, protein 7) (ADP-ribosylation factor-like protein LAK).]                                                                                                                                                                                        | Nuclear |
| <b>Q9Y2T1</b> | [Axin-2 (Axis inhibition protein 2) (Conductin) (Axin-like protein), (Axil).]                                                                                                                                                                                                                                          | Nuclear |
| <b>Q81XQ6</b> | [Poly [ADP-ribose] polymerase 9 (EC 2.4.2.30) (PARP-9) (B aggressive, lymphoma protein).]                                                                                                                                                                                                                              | Nuclear |
| <b>Q9Y6J0</b> | Calcineurin-binding protein Cabin 1 (Calcineurin inhibitor) (CAIN).                                                                                                                                                                                                                                                    | Nuclear |
| <b>Q09161</b> | [Nuclear cap-binding protein subunit 1 (80 kDa nuclear cap-binding, protein) (NCBP 80 kDa subunit) (CBP80).]                                                                                                                                                                                                           | Nuclear |
| <b>P14635</b> | G2/mitotic-specific cyclin-B1.                                                                                                                                                                                                                                                                                         | Nuclear |
| <b>Q12873</b> | [Chromodomain-helicase-DNA-binding protein 3 (EC 3.6.1.-) (ATP-, dependent helicase CHD3) (CHD-3) (Mi-2 autoantigen 240 kDa protein), (Mi2 alpha) (Zinc finger helicase) (hZFH).]                                                                                                                                      | Nuclear |
| <b>Q9NYV4</b> | [Cell division cycle 2-related protein kinase 7 (EC 2.7.11.22) (CDC2-, related protein kinase 7) (Cdc2-related kinase, arginine/serine-rich), (CrkRS).]                                                                                                                                                                | Nuclear |
| <b>Q05048</b> | [Cleavage stimulation factor 50 kDa subunit (CSTF 50 kDa subunit) (CF-1, 50 kDa subunit) (CstF-50).]                                                                                                                                                                                                                   | Nuclear |
| <b>Q92879</b> | [CUG-BP- and ETR-3-like factor 1 (CELF-1) (Bruno-like protein 2) (RNA-, binding protein BRUNOL-2) (CUG triplet repeat RNA-binding protein 1), (CUG-BP1) (Deadenylation factor CUG-BP) (50 kDa nuclear polyadenylated, RNA-binding protein) (Embryo deadenylation element-binding protein, homolog) (EDEN-BP homolog).] | Nuclear |
| <b>Q14529</b> | Homeobox protein cut-like 2 (Homeobox protein Cux-2) (Cut-like 2).                                                                                                                                                                                                                                                     | Nuclear |
| <b>O60231</b> | [Putative pre-mRNA-splicing factor ATP-dependent RNA helicase DHX16, (EC 3.6.1.-) (DEAH-box protein 16) (ATP-dependent RNA helicase #3).]                                                                                                                                                                              | Nuclear |
| <b>Q14181</b> | DNA polymerase subunit alpha B (DNA polymerase alpha 70 kDa subunit).                                                                                                                                                                                                                                                  | Nuclear |
| <b>Q07864</b> | [DNA polymerase epsilon catalytic subunit A (EC 2.7.7.7) (DNA, polymerase II subunit A).]                                                                                                                                                                                                                              | Nuclear |
| <b>O43781</b> | [Dual specificity tyrosine-phosphorylation-regulated kinase 3, (EC 2.7.12.1) (Regulatory erythroid kinase) (REDK).]                                                                                                                                                                                                    | Nuclear |
| <b>P19419</b> | ETS domain-containing protein Elk-1.                                                                                                                                                                                                                                                                                   | Nuclear |
| <b>P15408</b> | Fos-related antigen 2.                                                                                                                                                                                                                                                                                                 | Nuclear |
| <b>Q16665</b> | [Hypoxia-inducible factor 1 alpha (HIF-1 alpha) (HIF1 alpha) (ARNT-, interacting protein) (Member of PAS protein 1) (Basic-helix-loop-, helix-PAS protein MOP1).]                                                                                                                                                      | Nuclear |
| <b>P41235</b> | [Hepatocyte nuclear factor 4-alpha (HNF-4-alpha) (Transcription factor, HNF-4) (Transcription factor 14).]                                                                                                                                                                                                             | Nuclear |
| <b>Q03164</b> | Zinc finger protein HRX (ALL-1) (Trithorax-like protein).                                                                                                                                                                                                                                                              | Nuclear |
| <b>Q99081</b> | [Transcription factor 12 (Transcription factor HTF-4) (E-box-binding, protein) (DNA-binding protein HTF4).]                                                                                                                                                                                                            | Nuclear |

|               |                                                                                                                                                                                                                                                                                                                                     |         |
|---------------|-------------------------------------------------------------------------------------------------------------------------------------------------------------------------------------------------------------------------------------------------------------------------------------------------------------------------------------|---------|
| <b>P13010</b> | [ATP-dependent DNA helicase 2 subunit 2 (EC 3.6.1.-) (ATP-dependent DNA, helicase II 80 kDa subunit) (Lupus Ku autoantigen protein p86) (Ku86), (Ku80) (86 kDa subunit of Ku antigen) (Thyroid-lupus autoantigen), (TLAA) (CTC box-binding factor 85 kDa subunit) (CTCBF) (CTC85), (Nuclear factor IV) (DNA-repair protein XRCC5).] | Nuclear |
| <b>Q14739</b> | [Lamin-B receptor (Integral nuclear envelope inner membrane protein), (LMN2R).]                                                                                                                                                                                                                                                     | Nuclear |
| <b>Q9Y2U8</b> | Inner nuclear membrane protein Man1 (LEM domain-containing protein 3).                                                                                                                                                                                                                                                              | Nuclear |
| <b>P33991</b> | DNA replication licensing factor MCM4 (CDC21 homolog) (P1-CDC21).                                                                                                                                                                                                                                                                   | Nuclear |
| <b>O15151</b> | [Mdm4 protein (p53-binding protein Mdm4) (Mdm2-like p53-binding, protein) (Mdmx protein) (Double minute 4 protein).]                                                                                                                                                                                                                | Nuclear |
| <b>P49959</b> | [Double-strand break repair protein MRE11A (MRE11 homolog 1) (MRE11, meiotic recombination 11 homolog A).]                                                                                                                                                                                                                          | Nuclear |
| <b>Q9Y618</b> | [Nuclear receptor corepressor 2 (N-CoR2) (Silencing mediator of, retinoic acid and thyroid hormone receptor) (SMRT) (SMRTE) (Thyroid-, retinoic-acid-receptor-associated corepressor) (T3 receptor-, associating factor) (TRAC) (CTG repeat protein 26) (SMAP270).]                                                                 | Nuclear |
| <b>Q14995</b> | [Orphan nuclear receptor NR1D2 (Rev-erb-beta) (EAR-1R) (Orphan nuclear, hormone receptor BD73).]                                                                                                                                                                                                                                    | Nuclear |
| <b>O43929</b> | Origin recognition complex subunit 4.                                                                                                                                                                                                                                                                                               | Nuclear |
| <b>Q09472</b> | [Histone acetyltransferase p300 (EC 2.3.1.48) (E1A-associated protein, p300).]                                                                                                                                                                                                                                                      | Nuclear |
| <b>P55771</b> | Paired box protein Pax-9.                                                                                                                                                                                                                                                                                                           | Nuclear |
| <b>P54278</b> | PMS1 protein homolog 2 (DNA mismatch repair protein PMS2).                                                                                                                                                                                                                                                                          | Nuclear |
| <b>P53041</b> | [Serine/threonine-protein phosphatase 5 (EC 3.1.3.16) (PP5) (Protein, phosphatase T) (PP-T) (PPT).]                                                                                                                                                                                                                                 | Nuclear |
| <b>Q9HAZ2</b> | [PR domain zinc finger protein 16 (PR domain-containing protein 16), (Transcription factor MEL1).]                                                                                                                                                                                                                                  | Nuclear |
| <b>Q00577</b> | [Transcriptional activator protein Pur-alpha (Purine-rich single-, stranded DNA-binding protein alpha).]                                                                                                                                                                                                                            | Nuclear |
| <b>Q13610</b> | [Periodic tryptophan protein 1 homolog (Keratinocyte protein IEF SSP, 9502).]                                                                                                                                                                                                                                                       | Nuclear |
| <b>P54727</b> | [UV excision repair protein RAD23 homolog B (hHR23B) (XP-C repair-, complementing complex 58 kDa protein) (p58).]                                                                                                                                                                                                                   | Nuclear |
| <b>P38159</b> | [Heterogeneous nuclear ribonucleoprotein G (hnRNP G) (RNA-binding motif, protein, X chromosome) (Glycoprotein p43) [Contains: Processed, heterogeneous nuclear ribonucleoprotein G].]                                                                                                                                               | Nuclear |
| <b>O95602</b> | [DNA-directed RNA polymerase I subunit RPA1 (EC 2.7.7.6) (DNA-directed, RNA polymerase I largest subunit) (RNA polymerase I 194 kDa subunit), (RPA194) (A190).]                                                                                                                                                                     | Nuclear |
| <b>P24928</b> | [DNA-directed RNA polymerase II subunit RPB1 (EC 2.7.7.6) (RNA, polymerase II subunit B1) (DNA-directed RNA polymerase II subunit A), (DNA-directed RNA polymerase III largest subunit).]                                                                                                                                           | Nuclear |
| <b>P28702</b> | Retinoic acid receptor RXR-beta (Retinoid X receptor beta).                                                                                                                                                                                                                                                                         | Nuclear |
| <b>Q16181</b> | Septin-7 (CDC10 protein homolog).                                                                                                                                                                                                                                                                                                   | Nuclear |
| <b>O60315</b> | [Zinc finger E-box-binding homeobox 2 (Zinc finger homeobox protein 1b), (Smad-interacting protein 1) (SMADIP1).]                                                                                                                                                                                                                   | Nuclear |
| <b>P28370</b> | [Probable global transcription activator SNF2L1 (EC 3.6.1.-), (Nucleosome-remodeling factor subunit SNF2L) (ATP-dependent helicase, SMARCA1) (SWI/SNF-related matrix-associated actin-dependent regulator, of chromatin subfamily A member 1).]                                                                                     | Nuclear |
| <b>O00570</b> | SOX-1 protein.                                                                                                                                                                                                                                                                                                                      | Nuclear |
| <b>Q01082</b> | [Spectrin beta chain, brain 1 (Spectrin, non-erythroid beta chain 1), (Beta-II spectrin) (Fodrin beta chain).]                                                                                                                                                                                                                      | Nuclear |
| <b>O14981</b> | [TATA-binding protein-associated factor 172 (EC 3.6.1.-) (ATP-dependent, helicase BTAF1) (TBP-associated factor 172) (TAF-172) (TAF(II)170) (B-, TFIID transcription factor-associated 170 kDa subunit).]                                                                                                                           | Nuclear |
| <b>Q9UMN6</b> | [WW domain-binding protein 7 (Myeloid/lymphoid or mixed-lineage, leukemia protein 4) (Trithorax homolog 2).]                                                                                                                                                                                                                        | Nuclear |
| <b>P17480</b> | [Nucleolar transcription factor 1 (Upstream-binding factor 1) (UBF-1), (Autoantigen NOR-90).]                                                                                                                                                                                                                                       | Nuclear |
| <b>P30291</b> | Wee1-like protein kinase (EC 2.7.10.2) (Wee1A kinase) (WEE1hu).                                                                                                                                                                                                                                                                     | Nuclear |

|               |                                                                                                                                                                                                                       |         |
|---------------|-----------------------------------------------------------------------------------------------------------------------------------------------------------------------------------------------------------------------|---------|
| <b>Q14191</b> | Werner syndrome ATP-dependent helicase (EC 3.6.1.-).                                                                                                                                                                  | Nuclear |
| <b>P23025</b> | [DNA-repair protein complementing XP-A cells (Xeroderma pigmentosum, group A-complementing protein).]                                                                                                                 | Nuclear |
| <b>O14628</b> | Zinc finger protein 195.                                                                                                                                                                                              | Nuclear |
| <b>Q9Y2Q1</b> | Zinc finger protein 257 (Bone marrow zinc finger 4) (BMZF-4).                                                                                                                                                         | Nuclear |
| <b>Q9Y2X9</b> | [Zinc finger protein 281 (Zinc finger DNA-binding protein 99), (Transcription factor ZBP-99) (GC-box-binding zinc finger protein 1).]                                                                                 | Nuclear |
| <b>Q9Y5A6</b> | [Zinc finger and SCAN domain-containing protein 21 (Zinc finger protein, 38 homolog) (Zfp-38) (Renal carcinoma antigen NY-REN-21).]                                                                                   | Nuclear |
| <b>P17029</b> | [Zinc finger protein with KRAB and SCAN domains 1 (Zinc finger protein, 36) (Zinc finger protein KOX18).]                                                                                                             | Nuclear |
| <b>P51523</b> | Zinc finger protein 84 (Zinc finger protein HPF2).                                                                                                                                                                    | Nuclear |
| <b>P00519</b> | [Proto-oncogene tyrosine-protein kinase ABL1 (EC 2.7.10.2) (p150) (c-, ABL) (Abelson murine leukemia viral oncogene homolog 1).]                                                                                      | Nuclear |
| <b>P35869</b> | Aryl hydrocarbon receptor precursor (Ah receptor) (AhR).                                                                                                                                                              | Nuclear |
| <b>O95696</b> | Bromodomain-containing protein 1 (BR140-like protein).                                                                                                                                                                | Nuclear |
| <b>P52298</b> | [Nuclear cap-binding protein subunit 2 (20 kDa nuclear cap-binding, protein) (NCBP 20 kDa subunit) (CBP20) (NCBP-interacting protein 1), (NIP1) (Cell proliferation-inducing gene 55 protein).]                       | Nuclear |
| <b>O60583</b> | Cyclin-T2 (CycT2).                                                                                                                                                                                                    | Nuclear |
| <b>P24864</b> | G1/S-specific cyclin-E1.                                                                                                                                                                                              | Nuclear |
| <b>P49711</b> | [Transcriptional repressor CTCF (CCCTC-binding factor) (CTCFL paralog), (11-zinc finger protein).]                                                                                                                    | Nuclear |
| <b>O60832</b> | [H/ACA ribonucleoprotein complex subunit 4 (EC 5.4.99.-) (Dyskerin), (Nucleolar protein family A member 4) (snoRNP protein DKC1) (Nopp140-, associated protein of 57 kDa) (Nucleolar protein NAP57) (CBF5, homolog).] | Nuclear |
| <b>Q92988</b> | Homeobox protein DLX-4 (DLX-7) (DLX-8) (Beta protein 1).                                                                                                                                                              | Nuclear |
| <b>P26358</b> | [DNA (cytosine-5)-methyltransferase 1 (EC 2.1.1.37) (Dnmt1) (DNA, methyltransferase Hsal) (DNA MTase Hsal) (MCMT) (M.Hsal).]                                                                                          | Nuclear |
| <b>P09884</b> | DNA polymerase alpha catalytic subunit (EC 2.7.7.7).                                                                                                                                                                  | Nuclear |
| <b>Q9UGP5</b> | [DNA polymerase lambda (EC 2.7.7.7) (EC 4.2.99.-) (Pol Lambda) (DNA, polymerase kappa) (DNA polymerase beta-2) (Pol beta2).]                                                                                          | Nuclear |
| <b>Q99856</b> | [AT-rich interactive domain-containing protein 3A (ARID domain-, containing protein 3A) (Dead ringer-like protein 1) (Bright) (E2F-, binding protein 1).]                                                             | Nuclear |
| <b>Q13627</b> | [Dual specificity tyrosine-phosphorylation-regulated kinase 1A, (EC 2.7.12.1) (Protein kinase minibrain homolog) (MNBH) (HP86) (Dual, specificity YAK1-related kinase) (hMNB).]                                       | Nuclear |
| <b>O14682</b> | [Ectoderm-neural cortex protein 1 (ENC-1) (p53-induced gene 10 protein), (Nuclear matrix protein NRP/B).]                                                                                                             | Nuclear |
| <b>P41162</b> | [ETS translocation variant 3 (ETS domain transcriptional repressor PE1), (PE-1) (Mitogenic Ets transcriptional suppressor).]                                                                                          | Nuclear |
| <b>Q16676</b> | [Forkhead box protein D1 (Forkhead-related protein FKHL8) (Forkhead-, related transcription factor 4) (FREAC-4).]                                                                                                     | Nuclear |
| <b>Q14161</b> | [ARF GTPase-activating protein GIT2 (G protein-coupled receptor kinase-, interactor 2) (GRK-interacting protein 2) (Cool-interacting tyrosine-, phosphorylated protein 2) (CAT2) (CAT-2).]                            | Nuclear |
| <b>Q9UGU5</b> | High mobility group protein 2-like 1 (Protein HMGBCG).                                                                                                                                                                | Nuclear |
| <b>Q9UBCO</b> | Hepatocyte nuclear factor 6 (HNF-6) (One cut domain family member 1).                                                                                                                                                 | Nuclear |
| <b>P31277</b> | Homeobox protein Hox-D11 (Hox-4F).                                                                                                                                                                                    | Nuclear |
| <b>Q15306</b> | [Interferon regulatory factor 4 (IRF-4) (Lymphocyte-specific interferon, regulatory factor) (LSIRF) (NF-EM5) (Multiple myeloma oncogene 1).]                                                                          | Nuclear |
| <b>Q13118</b> | [Krueppel-like factor 10 (Transforming growth factor-beta-inducible, early growth response protein 1) (TGFB-inducible early growth response, protein 1) (TIEG-1) (EGR-alpha).]                                        | Nuclear |

|               |                                                                                                                                                                                                                                  |         |
|---------------|----------------------------------------------------------------------------------------------------------------------------------------------------------------------------------------------------------------------------------|---------|
| <b>P51826</b> | [AF4/FMR2 family member 3 (Protein LAF-4) (Lymphoid nuclear protein, related to AF4).]                                                                                                                                           | Nuclear |
| <b>P10242</b> | Myb proto-oncogene protein (C-myb).                                                                                                                                                                                              | Nuclear |
| <b>Q01538</b> | [Myelin transcription factor 1 (MyT1) (MyTI) (Proteolipid protein-, binding protein) (PLPB1).]                                                                                                                                   | Nuclear |
| <b>Q15596</b> | [Nuclear receptor coactivator 2 (NCoA-2) (Transcriptional intermediary, factor 2).]                                                                                                                                              | Nuclear |
| <b>Q13823</b> | Nucleolar GTP-binding protein 2 (Autoantigen NGP-1).                                                                                                                                                                             | Nuclear |
| <b>P46087</b> | [Putative RNA methyltransferase NOL1 (EC 2.1.1.-) (Proliferating-cell, nucleolar antigen p120) (Proliferation-associated nucleolar protein, p120).]                                                                              | Nuclear |
| <b>O00482</b> | [Orphan nuclear receptor NR5A2 (Alpha-1-fetoprotein transcription, factor) (Hepatocytic transcription factor) (B1-binding factor) (hB1F), (CYP7A promoter-binding factor) (Liver receptor homolog 1) (LRH-1).]                   | Nuclear |
| <b>Q06518</b> | [Nitric oxide synthase, inducible (EC 1.14.13.39) (NOS type II), (Inducible NO synthase) (Inducible NOS) (iNOS).]                                                                                                                | Nuclear |
| <b>P40424</b> | [Pre-B-cell leukemia transcription factor 1 (Homeobox protein PBX1), (Homeobox protein PRL).]                                                                                                                                    | Nuclear |
| <b>Q01780</b> | [Exosome component 10 (Polymyositis/scleroderma autoantigen 2), (Autoantigen PM/Sc1 2) (Polymyositis/scleroderma autoantigen 100 kDa), (PM/Sc1-100) (P100 polymyositis-scleroderma overlap syndrome-, associated autoantigen).]  | Nuclear |
| <b>Q07869</b> | Peroxisome proliferator-activated receptor alpha (PPAR-alpha).                                                                                                                                                                   | Nuclear |
| <b>Q9HCU5</b> | [Prolactin regulatory element-binding protein (Mammalian guanine, nucleotide exchange factor mSec12).]                                                                                                                           | Nuclear |
| <b>P26599</b> | [Polypyrimidine tract-binding protein 1 (PTB) (Heterogeneous nuclear, ribonucleoprotein I) (hnRNP I) (57 kDa RNA-binding protein PPTB-1).]                                                                                       | Nuclear |
| <b>P43351</b> | DNA repair protein RAD52 homolog.                                                                                                                                                                                                | Nuclear |
| <b>Q9Y2P8</b> | RNA 3'-terminal phosphate cyclase-like protein.                                                                                                                                                                                  | Nuclear |
| <b>P48552</b> | [Nuclear receptor-interacting protein 1 (Nuclear factor RIP140), (Receptor-interacting protein 140).]                                                                                                                            | Nuclear |
| <b>P31943</b> | Heterogeneous nuclear ribonucleoprotein H (hnRNP H).                                                                                                                                                                             | Nuclear |
| <b>Q00839</b> | [Heterogeneous nuclear ribonucleoprotein U (hnRNP U) (Scaffold, attachment factor A) (SAF-A) (p120) (pp120).]                                                                                                                    | Nuclear |
| <b>O14802</b> | [DNA-directed RNA polymerase III subunit RPC1 (EC 2.7.7.6) (RNA, polymerase III subunit C1) (DNA-directed RNA polymerase III subunit A), (DNA-directed RNA polymerase III largest subunit) (RPC155) (C160).]                     | Nuclear |
| <b>Q01130</b> | [Splicing factor, arginine/serine-rich 2 (Splicing factor SC35) (SC-35), (Splicing component, 35 kDa) (Protein PR264).]                                                                                                          | Nuclear |
| <b>P51531</b> | [Probable global transcription activator SNF2L2 (EC 3.6.1.-) (ATP-, dependent helicase SMARCA2) (SNF2-alpha) (SWI/SNF-related matrix-, associated actin-dependent regulator of chromatin subfamily A member, 2) (hBRM).]         | Nuclear |
| <b>P48436</b> | Transcription factor SOX-9.                                                                                                                                                                                                      | Nuclear |
| <b>Q02447</b> | Transcription factor Sp3 (SPR-2).                                                                                                                                                                                                | Nuclear |
| <b>Q12962</b> | [Transcription initiation factor TFIID subunit 10 (Transcription, initiation factor TFIID 30 kDa subunit) (TAF(II)30) (TAFII-30), (TAFII30) (STAF28).]                                                                           | Nuclear |
| <b>Q16890</b> | Tumor protein D53 (hD53) (Tumor protein D52-like 1).                                                                                                                                                                             | Nuclear |
| <b>P11388</b> | [DNA topoisomerase 2-alpha (EC 5.99.1.3) (DNA topoisomerase II, alpha, isozyme).]                                                                                                                                                | Nuclear |
| <b>Q15695</b> | [U2 small nuclear ribonucleoprotein auxiliary factor 35 kDa subunit-, related protein 1 (U2(RNU2) small nuclear RNA auxiliary factor 1-like, 1) (CCCH type zinc finger, RNA-binding motif and serine/arginine rich, protein 1).] | Nuclear |
| <b>P62988</b> | Ubiquitin.                                                                                                                                                                                                                       | Nuclear |
| <b>O60287</b> | Nucleolar preribosomal-associated protein 1 (Fragment).                                                                                                                                                                          | Nuclear |
| <b>P52742</b> | Zinc finger protein 135 (Zinc finger protein 61).                                                                                                                                                                                | Nuclear |

|               |                                                                                                                                                                                                                                                         |         |
|---------------|---------------------------------------------------------------------------------------------------------------------------------------------------------------------------------------------------------------------------------------------------------|---------|
| <b>Q05516</b> | [Zinc finger and BTB domain-containing protein 16 (Zinc finger protein, PLZF) (Promyelocytic leukemia zinc finger protein) (Zinc finger, protein 145).]                                                                                                 | Nuclear |
| <b>P98182</b> | Zinc finger protein 200.                                                                                                                                                                                                                                | Nuclear |
| <b>Q9UL59</b> | [Zinc finger protein 214 (BWSCR2-associated zinc finger protein 1) (BAZ, 1).]                                                                                                                                                                           | Nuclear |
| <b>Q9UL36</b> | Zinc finger protein 236.                                                                                                                                                                                                                                | Nuclear |
| <b>Q9UDV7</b> | Zinc finger protein 282 (HTLV-I U5RE-binding protein 1) (HUB-1).                                                                                                                                                                                        | Nuclear |
| <b>Q9Y2L8</b> | [Zinc finger protein with KRAB and SCAN domains 5 (Zinc finger protein, 95 homolog) (Zfp-95).]                                                                                                                                                          | Nuclear |
| <b>P17038</b> | [Zinc finger protein 43 (Zinc protein HTF6) (Zinc finger protein, KOX27).]                                                                                                                                                                              | Nuclear |
| <b>P35789</b> | [Zinc finger protein 93 (Zinc finger protein 505) (Zinc finger protein, HTF34).]                                                                                                                                                                        | Nuclear |
| <b>P98168</b> | Zinc finger X-linked protein ZXDA.                                                                                                                                                                                                                      | Nuclear |
| <b>O75478</b> | Transcriptional adapter 2-like (ADA2-like protein).                                                                                                                                                                                                     | Nuclear |
| <b>Q01954</b> | Zinc finger protein basonuclin-1.                                                                                                                                                                                                                       | Nuclear |
| <b>Q9Y6J0</b> | Calcineurin-binding protein Cabin 1 (Calcineurin inhibitor) (CAIN).                                                                                                                                                                                     | Nuclear |
| <b>P11802</b> | [Cell division protein kinase 4 (EC 2.7.11.22) (Cyclin-dependent kinase, 4) (PSK-J3).]                                                                                                                                                                  | Nuclear |
| <b>Q9ULW0</b> | [Targeting protein for Xklp2 (Restricted expression proliferation-, associated protein 100) (p100) (Differentially expressed in cancerous, and noncancerous lung cells 2) (DIL-2) (Protein fls353), (Hepatocellular carcinoma-associated antigen 519).] | Nuclear |
| <b>Q9UBC3</b> | [DNA (cytosine-5)-methyltransferase 3B (EC 2.1.1.37) (Dnmt3b) (DNA, methyltransferase HsaIIIB) (DNA MTase HsaIIIB) (M.HsaIIIB).]                                                                                                                        | Nuclear |
| <b>P49916</b> | [DNA ligase 3 (EC 6.5.1.1) (DNA ligase III) (Polydeoxyribonucleotide, synthase [ATP] 3).]                                                                                                                                                               | Nuclear |
| <b>O75417</b> | DNA polymerase theta (EC 2.7.7.7) (DNA polymerase eta).                                                                                                                                                                                                 | Nuclear |
| <b>Q9Y463</b> | [Dual specificity tyrosine-phosphorylation-regulated kinase 1B, (EC 2.7.12.1) (Mirk protein kinase) (Minibrain-related kinase).]                                                                                                                        | Nuclear |
| <b>P43268</b> | [ETS translocation variant 4 (Adenovirus E1A enhancer-binding protein), (E1A-F).]                                                                                                                                                                       | Nuclear |
| <b>P42685</b> | [Tyrosine-protein kinase FRK (EC 2.7.10.2) (FYN-related kinase), (Nuclear tyrosine protein kinase RAK).]                                                                                                                                                | Nuclear |
| <b>O00358</b> | [Forkhead box protein E1 (Thyroid transcription factor 2) (TTF-2), (Forkhead-related protein FKHL15).]                                                                                                                                                  | Nuclear |
| <b>Q9UKS7</b> | Zinc finger protein Helios (Ikaros family zinc finger protein 2).                                                                                                                                                                                       | Nuclear |
| <b>P54198</b> | Protein HIRA (TUP1-like enhancer of split protein 1).                                                                                                                                                                                                   | Nuclear |
| <b>Q16534</b> | Hepatic leukemia factor.                                                                                                                                                                                                                                | Nuclear |
| <b>Q13049</b> | [Tripartite motif-containing protein 32 (EC 6.3.2.-) (Zinc finger, protein HT2A) (72 kDa Tat-interacting protein).]                                                                                                                                     | Nuclear |
| <b>Q16666</b> | [Gamma-interferon-inducible protein Irf-16 (Interferon-inducible, myeloid differentiation transcriptional activator) (IFI 16).]                                                                                                                         | Nuclear |
| <b>Q15349</b> | [Ribosomal protein S6 kinase alpha-2 (EC 2.7.11.1) (S6K-alpha 2) (90, kDa ribosomal protein S6 kinase 2) (p90-RSK 2) (Ribosomal S6 kinase 3), (RSK-3) (pp90RSK3) (MAP kinase-activated protein kinase 1c), (MAPKAPK1C).]                                | Nuclear |
| <b>Q13342</b> | [Nuclear body protein SP140 (Nuclear autoantigen Sp-140) (Speckled 140, kDa) (LYSp100 protein) (Lymphoid-restricted homolog of Sp100).]                                                                                                                 | Nuclear |
| <b>P43243</b> | Matrin-3.                                                                                                                                                                                                                                               | Nuclear |
| <b>P25205</b> | [DNA replication licensing factor MCM3 (DNA polymerase alpha, holoenzyme-associated protein P1) (RLF subunit beta) (P102 protein), (P1-MCM3).]                                                                                                          | Nuclear |
| <b>Q00987</b> | [E3 ubiquitin-protein ligase Mdm2 (EC 6.3.2.-) (p53-binding protein, Mdm2) (Oncoprotein Mdm2) (Double minute 2 protein) (Hdm2).]                                                                                                                        | Nuclear |
| <b>Q92794</b> | [Histone acetyltransferase MYST3 (EC 2.3.1.48) (EC 2.3.1.-) (MYST, protein 3) (MOZ, YBF2/SAS3, SAS2 and TIP60 protein 3) (Runt-related, transcription factor-binding protein 2) (Monocytic leukemia zinc, finger protein) (Zinc finger protein 220).]   | Nuclear |

|               |                                                                                                                                                                                                                                                                                                          |         |
|---------------|----------------------------------------------------------------------------------------------------------------------------------------------------------------------------------------------------------------------------------------------------------------------------------------------------------|---------|
| <b>O15457</b> | MutS protein homolog 4.                                                                                                                                                                                                                                                                                  | Nuclear |
| <b>O60682</b> | Musculin (Activated B-cell factor 1) (ABF-1).                                                                                                                                                                                                                                                            | Nuclear |
| <b>P10243</b> | Myb-related protein A (A-Myb).                                                                                                                                                                                                                                                                           | Nuclear |
| <b>O94916</b> | [Nuclear factor of activated T-cells 5 (T-cell transcription factor, NFAT5) (NF-AT5) (Tonicity-responsive enhancer-binding protein) (TonE-, binding protein) (TonEBP).]                                                                                                                                  | Nuclear |
| <b>P46087</b> | [Putative RNA methyltransferase NOL1 (EC 2.1.1.-) (Proliferating-cell, nucleolar antigen p120) (Proliferation-associated nucleolar protein, p120).]                                                                                                                                                      | Nuclear |
| <b>Q15233</b> | [Non-POU domain-containing octamer-binding protein (NonO protein) (54, kDa nuclear RNA- and DNA-binding protein) (p54(nrb)) (p54nrb) (55 kDa, nuclear protein) (NMT55) (DNA-binding p52/p100 complex, 52 kDa, subunit).]                                                                                 | Nuclear |
| <b>Q13416</b> | Origin recognition complex subunit 2.                                                                                                                                                                                                                                                                    | Nuclear |
| <b>P54277</b> | PMS1 protein homolog 1 (DNA mismatch repair protein PMS1).                                                                                                                                                                                                                                               | Nuclear |
| <b>Q03181</b> | [Peroxisome proliferator-activated receptor delta (PPAR-delta) (PPAR-, beta) (Nuclear hormone receptor 1) (NUC1) (NUC1).]                                                                                                                                                                                | Nuclear |
| <b>P09874</b> | [Poly [ADP-ribose] polymerase 1 (EC 2.4.2.30) (PARP-1) (ADPRT) (NAD(+), ADP-ribosyltransferase 1) (Poly[ADP-ribose] synthetase 1).]                                                                                                                                                                      | Nuclear |
| <b>P17980</b> | [26S protease regulatory subunit 6A (Proteasome 26S subunit ATPase 3), (Tat-binding protein 1) (TBP-1) (Proteasome subunit P50).]                                                                                                                                                                        | Nuclear |
| <b>P25786</b> | [Proteasome subunit alpha type-1 (EC 3.4.25.1) (Proteasome component, C2) (Macropain subunit C2) (Multicatalytic endopeptidase complex, subunit C2) (Proteasome nu chain) (30 kDa prosomal protein) (PROS-30).]                                                                                          | Nuclear |
| <b>Q06330</b> | [Recombining binding protein suppressor of hairless (J kappa-, recombination signal-binding protein) (RBP-J kappa) (RBP-J) (RBP-JK), (CBF-1) (Renal carcinoma antigen NY-REN-30).]                                                                                                                       | Nuclear |
| <b>P46063</b> | ATP-dependent DNA helicase Q1 (EC 3.6.1.-) (DNA-dependent ATPase Q1).                                                                                                                                                                                                                                    | Nuclear |
| <b>P52597</b> | [Heterogeneous nuclear ribonucleoprotein F (hnRNP F) (Nucleolin-like, protein mcs94-1).]                                                                                                                                                                                                                 | Nuclear |
| <b>P55795</b> | Heterogeneous nuclear ribonucleoprotein H' (hnRNP H') (FTP-3).                                                                                                                                                                                                                                           | Nuclear |
| <b>O15160</b> | [DNA-directed RNA polymerases I and III subunit RPAC1 (RNA polymerases, I and III subunit AC1) (DNA-directed RNA polymerase I subunit C) (DNA-, directed RNA polymerases I and III 40 kDa polypeptide) (RPA40) (RPA39), (RPC40) (AC40).]                                                                 | Nuclear |
| <b>P12755</b> | Ski oncogene (C-ski).                                                                                                                                                                                                                                                                                    | Nuclear |
| <b>P51532</b> | [Probable global transcription activator SNF2L4 (EC 3.6.1.-) (ATP-, dependent helicase SMARCA4) (SNF2-beta) (BRG-1 protein) (Mitotic, growth and transcription activator) (Brahma protein homolog 1), (SWI/SNF-related matrix-associated actin-dependent regulator of, chromatin subfamily A member 4).] | Nuclear |
| <b>P08047</b> | Transcription factor Sp1.                                                                                                                                                                                                                                                                                | Nuclear |
| <b>Q9H254</b> | [Spectrin beta chain, brain 3 (Spectrin, non-erythroid beta chain 3), (Beta-IV spectrin).]                                                                                                                                                                                                               | Nuclear |
| <b>P11831</b> | Serum response factor (SRF).                                                                                                                                                                                                                                                                             | Nuclear |
| <b>Q13569</b> | G/T mismatch-specific thymine DNA glycosylase (EC 3.2.2.-).                                                                                                                                                                                                                                              | Nuclear |
| <b>P42166</b> | [Lamina-associated polypeptide 2 isoform alpha (Thymopoietin isoform, alpha) (TP alpha) (Thymopoietin-related peptide isoform alpha) (TPRP, isoform alpha) [Contains: Thymopoietin (TP) (Splenin); Thymopentin, (TP5)].]                                                                                 | Nuclear |
| <b>O95985</b> | [DNA topoisomerase 3-beta-1 (EC 5.99.1.2) (DNA topoisomerase III beta-, 1).]                                                                                                                                                                                                                             | Nuclear |
| <b>O75386</b> | Tubby-related protein 3 (Tubby-like protein 3).                                                                                                                                                                                                                                                          | Nuclear |
| <b>O94782</b> | [Ubiquitin carboxyl-terminal hydrolase 1 (EC 3.1.2.15) (Ubiquitin, thioesterase 1) (Ubiquitin-specific-processing protease 1), (Deubiquitinating enzyme 1) (hUBP).]                                                                                                                                      | Nuclear |
| <b>Q9UMW8</b> | [Ubl carboxyl-terminal hydrolase 18 (EC 3.1.2.-) (Ubl thioesterase 18), (ISG15-specific-processing protease) (43 kDa ISG15-specific protease), (hUBP43).]                                                                                                                                                | Nuclear |

|               |                                                                                                                                                                                                                                    |                          |
|---------------|------------------------------------------------------------------------------------------------------------------------------------------------------------------------------------------------------------------------------------|--------------------------|
| <b>Q9UNX4</b> | WD repeat-containing protein 3.                                                                                                                                                                                                    | Nuclear                  |
| <b>Q9NSI6</b> | [Bromodomain and WD repeat-containing protein 1 (WD repeat-containing, protein 9).]                                                                                                                                                | Nuclear                  |
| <b>Q15398</b> | [Disks large-associated protein DLG7 (Discs large homolog 7) (Hepatoma, up-regulated protein) (HURP).]                                                                                                                             | Nuclear                  |
| <b>P42695</b> | [Condensin-II complex subunit D3 (Non-SMC condensin II complex subunit, D3) (hCAP-D3).]                                                                                                                                            | Nuclear                  |
| <b>Q9UDV6</b> | Zinc finger protein 212 (Zinc finger protein C2H2-150).                                                                                                                                                                            | Nuclear                  |
| <b>Q9NRM2</b> | Zinc finger protein 277.                                                                                                                                                                                                           | Nuclear                  |
| <b>P15822</b> | [Zinc finger protein 40 (Human immunodeficiency virus type I enhancer-, binding protein 1) (HIV-EP1) (Major histocompatibility complex-binding, protein 1) (MBP-1) (Positive regulatory domain II-binding factor 1), (PRDII-BF1).] | Nuclear                  |
| <b>P17098</b> | Zinc finger protein 8 (Zinc finger protein HF.18).                                                                                                                                                                                 | Nuclear                  |
| <b>P51815</b> | Zinc finger protein 75 (Zinc finger protein 82).                                                                                                                                                                                   | Nuclear                  |
| <b>P35658</b> | [Nuclear pore complex protein Nup214 (Nucleoporin Nup214) (214 kDa, nucleoporin) (CAN protein).]                                                                                                                                   | Nuclear Membrane         |
| <b>P49792</b> | [E3 SUMO-protein ligase RanBP2 (Ran-binding protein 2) (Nuclear pore, complex protein Nup358) (Nucleoporin Nup358) (358 kDa nucleoporin), (p270).]                                                                                 | Nuclear Membrane         |
| <b>P37802</b> | Transgelin-2 (SM22-alpha homolog).                                                                                                                                                                                                 | Nuclear Membrane         |
| <b>P49790</b> | [Nuclear pore complex protein Nup153 (Nucleoporin Nup153) (153 kDa, nucleoporin).]                                                                                                                                                 | Nuclear Membrane         |
| <b>P52594</b> | [Nucleoporin-like protein RIP (HIV-1 Rev-binding protein) (Rev-, interacting protein) (Rev/Rex activation domain-binding protein).]                                                                                                | Nuclear Membrane         |
| <b>Q9H2T7</b> | Ran-binding protein 17.                                                                                                                                                                                                            | Nuclear Membrane         |
| <b>P35609</b> | [Alpha-actinin-2 (Alpha-actinin skeletal muscle isoform 2) (F-actin, cross-linking protein).]                                                                                                                                      | Other Filament or Tubule |
| <b>P47756</b> | F-actin-capping protein subunit beta (CapZ beta).                                                                                                                                                                                  | Other Filament or Tubule |
| <b>P47755</b> | F-actin-capping protein subunit alpha-2 (CapZ alpha-2).                                                                                                                                                                            | Other Filament or Tubule |
| <b>P30260</b> | Cell division cycle protein 27 homolog (CDC27Hs) (H-NUC).                                                                                                                                                                          | Other Filament or Tubule |
| <b>P46940</b> | Ras GTPase-activating-like protein IQGAP1 (p195).                                                                                                                                                                                  | Other Filament or Tubule |
| <b>P08779</b> | [Keratin, type I cytoskeletal 16 (Cytokeratin-16) (CK-16) (Keratin-16), (K16).]                                                                                                                                                    | Other Filament or Tubule |
| <b>P04264</b> | [Keratin, type II cytoskeletal 1 (Cytokeratin-1) (CK-1) (Keratin-1), (K1) (67 kDa cytokeratin) (Hair alpha protein).]                                                                                                              | Other Filament or Tubule |
| <b>P48668</b> | [Keratin, type II cytoskeletal 6C (Cytokeratin-6C) (CK 6C) (K6c, keratin) (Cytokeratin-6E) (CK 6E) (Keratin K6h).]                                                                                                                 | Other Filament or Tubule |
| <b>P53350</b> | [Serine/threonine-protein kinase PLK1 (EC 2.7.11.21) (Polo-like kinase, 1) (PLK-1) (Serine/threonine-protein kinase 13) (STPK13).]                                                                                                 | Other Filament or Tubule |
| <b>Q08043</b> | [Alpha-actinin-3 (Alpha-actinin skeletal muscle isoform 3) (F-actin, cross-linking protein).]                                                                                                                                      | Other Filament or Tubule |
| <b>P68133</b> | Actin, alpha skeletal muscle (Alpha-actin-1).                                                                                                                                                                                      | Other Filament or Tubule |



|               |                                                                                                                                                                                                                                                                                                                      |                          |
|---------------|----------------------------------------------------------------------------------------------------------------------------------------------------------------------------------------------------------------------------------------------------------------------------------------------------------------------|--------------------------|
| <b>Q99996</b> | [A-kinase anchor protein 9 (Protein kinase A-anchoring protein 9), (PRKA9) (A-kinase anchor protein 450 kDa) (AKAP 450) (A-kinase anchor, protein 350 kDa) (AKAP 350) (hgAKAP 350) (AKAP 120-like protein), (Protein hyperion) (Protein yotiao) (Centrosome- and Golgi-localized, PKN-associated protein) (CG-NAP).] | Other Filament or Tubule |
| <b>O43903</b> | Growth-arrest-specific protein 2 (GAS-2).                                                                                                                                                                                                                                                                            | Other Filament or Tubule |
| <b>P13645</b> | [Keratin, type I cytoskeletal 10 (Cytokeratin-10) (CK-10) (Keratin-10), (K10).]                                                                                                                                                                                                                                      | Other Filament or Tubule |
| <b>P12035</b> | [Keratin, type II cytoskeletal 3 (Cytokeratin-3) (CK-3) (Keratin-3), (K3) (65 kDa cytokeratin).]                                                                                                                                                                                                                     | Other Filament or Tubule |
| <b>P35908</b> | [Keratin, type II cytoskeletal 2 epidermal (Cytokeratin-2e) (K2e) (CK, 2e) (keratin-2).]                                                                                                                                                                                                                             | Other Filament or Tubule |
| <b>P48681</b> | Nestin.                                                                                                                                                                                                                                                                                                              | Other Filament or Tubule |
| <b>Q13515</b> | [Phakinin (Beaded filament structural protein 2) (Lens fiber cell, beaded filament protein CP 49) (CP49) (49 kDa cytoskeletal protein), (CP 47) (CP47) (Lens intermediate filament-like light) (LIFL-L).]                                                                                                            | Other Filament or Tubule |
| <b>P52907</b> | F-actin-capping protein subunit alpha-1 (CapZ alpha-1).                                                                                                                                                                                                                                                              | Other Filament or Tubule |
| <b>P15311</b> | Ezrin (p81) (Cytovillin) (Villin-2).                                                                                                                                                                                                                                                                                 | Other Filament or Tubule |
| <b>P35900</b> | [Keratin, type I cytoskeletal 20 (Cytokeratin-20) (CK-20) (Keratin-20), (K20) (Protein IT).]                                                                                                                                                                                                                         | Other Filament or Tubule |
| <b>Q01546</b> | [Keratin, type II cytoskeletal 2 oral (Cytokeratin-2P) (K2P) (CK 2P), (Keratin-76).]                                                                                                                                                                                                                                 | Other Filament or Tubule |
| <b>P13647</b> | [Keratin, type II cytoskeletal 5 (Cytokeratin-5) (CK-5) (Keratin-5), (K5) (58 kDa cytokeratin).]                                                                                                                                                                                                                     | Other Filament or Tubule |
| <b>Q9UJT1</b> | Tubulin delta chain (Delta-tubulin).                                                                                                                                                                                                                                                                                 | Other Filament or Tubule |
| <b>P05408</b> | [Neuroendocrine protein 7B2 precursor (Secretogranin-5) (Secretogranin, V) (Secretory granule endocrine protein I) (Pituitary polypeptide), [Contains: N-terminal peptide; C-terminal peptide].]                                                                                                                     | Other Go Component       |
| <b>P30926</b> | Neuronal acetylcholine receptor subunit beta-4 precursor.                                                                                                                                                                                                                                                            | Other Go Component       |
| <b>P10323</b> | [Acrosin precursor (EC 3.4.21.10) [Contains: Acrosin light chain;, Acrosin heavy chain].]                                                                                                                                                                                                                            | Other Go Component       |
| <b>O43684</b> | Mitotic checkpoint protein BUB3.                                                                                                                                                                                                                                                                                     | Other Go Component       |
| <b>P20908</b> | Collagen alpha-1(V) chain precursor.                                                                                                                                                                                                                                                                                 | Other Go Component       |
| <b>P12107</b> | Collagen alpha-1(XI) chain precursor.                                                                                                                                                                                                                                                                                | Other Go Component       |
| <b>Q07092</b> | Collagen alpha-1(XVI) chain precursor.                                                                                                                                                                                                                                                                               | Other Go Component       |
| <b>P08572</b> | Collagen alpha-2(IV) chain precursor [Contains: Canstatin].                                                                                                                                                                                                                                                          | Other Go Component       |
| <b>P13942</b> | Collagen alpha-2(XI) chain precursor.                                                                                                                                                                                                                                                                                | Other Go Component       |
| <b>Q14031</b> | Collagen alpha-6(IV) chain precursor.                                                                                                                                                                                                                                                                                | Other Go Component       |
| <b>P08575</b> | [Leukocyte common antigen precursor (EC 3.1.3.48) (L-CA) (T200) (CD45, antigen).]                                                                                                                                                                                                                                    | Other Go Component       |
| <b>Q15517</b> | Corneodesmosin precursor (S protein).                                                                                                                                                                                                                                                                                | Other Go Component       |

|               |                                                                                                                                                                                                                                                                |                    |
|---------------|----------------------------------------------------------------------------------------------------------------------------------------------------------------------------------------------------------------------------------------------------------------|--------------------|
| <b>O96017</b> | Serine/threonine-protein kinase Chk2 (EC 2.7.11.1) (Cds1).                                                                                                                                                                                                     | Other Go Component |
| <b>P57739</b> | Claudin-2 (SP82).                                                                                                                                                                                                                                              | Other Go Component |
| <b>P32927</b> | [Cytokine receptor common beta chain precursor (GM-CSF/IL-3/IL-5, receptor common beta-chain) (CD131 antigen) (CDw131).]                                                                                                                                       | Other Go Component |
| <b>Q14562</b> | [ATP-dependent RNA helicase DHX8 (EC 3.6.1.-) (DEAH box protein 8) (RNA, helicase HRH1).]                                                                                                                                                                      | Other Go Component |
| <b>P11532</b> | Dystrophin.                                                                                                                                                                                                                                                    | Other Go Component |
| <b>PO5198</b> | [Eukaryotic translation initiation factor 2 subunit 1 (Eukaryotic, translation initiation factor 2 subunit alpha) (eIF-2-alpha) (EIF-, 2alpha) (EIF-2A).]                                                                                                      | Other Go Component |
| <b>Q14573</b> | [Inositol 1,4,5-trisphosphate receptor type 3 (Type 3 inositol 1,4,5-, trisphosphate receptor) (Type 3 InsP3 receptor) (IP3 receptor isoform, 3) (InsP3R3).]                                                                                                   | Other Go Component |
| <b>Q13557</b> | [Calcium/calmodulin-dependent protein kinase type II delta chain, (EC 2.7.11.17) (CaM-kinase II delta chain) (CaM kinase II subunit, delta) (CaMK-II subunit delta).]                                                                                          | Other Go Component |
| <b>P55268</b> | Laminin subunit beta-2 precursor (S-laminin) (Laminin B1s chain).                                                                                                                                                                                              | Other Go Component |
| <b>P23490</b> | Loricrin.                                                                                                                                                                                                                                                      | Other Go Component |
| <b>Q9HC15</b> | [Melanoma-associated antigen E1 (MAGE-E1 antigen) (Hepatocellular, carcinoma-associated protein 1).]                                                                                                                                                           | Other Go Component |
| <b>PO9012</b> | [U1 small nuclear ribonucleoprotein A (U1 snRNP protein A) (U1A, protein) (U1-A).]                                                                                                                                                                             | Other Go Component |
| <b>Q12874</b> | [Splicing factor 3A subunit 3 (Spliceosome-associated protein 61) (SAP, 61) (SF3a60).]                                                                                                                                                                         | Other Go Component |
| <b>P23497</b> | [Nuclear autoantigen Sp-100 (Speckled 100 kDa) (Nuclear dot-associated, Sp100 protein) (Lysp100b).]                                                                                                                                                            | Other Go Component |
| <b>PO2549</b> | Spectrin alpha chain, erythrocyte (Erythroid alpha-spectrin).                                                                                                                                                                                                  | Other Go Component |
| <b>Q15654</b> | [Thyroid receptor-interacting protein 6 (TRIP-6) (OPA-interacting, protein 1) (Zyxin-related protein 1) (ZRP-1).]                                                                                                                                              | Other Go Component |
| <b>O75643</b> | [U5 small nuclear ribonucleoprotein 200 kDa helicase (EC 3.6.1.-) (U5, snRNP-specific 200 kDa protein) (U5-200KD) (Activating signal, cointegrator 1 complex subunit 3-like 1) (BRR2 homolog).]                                                                | Other Go Component |
| <b>P61421</b> | [Vacuolar ATP synthase subunit d 1 (EC 3.6.3.14) (V-ATPase subunit d 1), (Vacuolar proton pump subunit d 1) (V-ATPase AC39 subunit) (V-ATPase, 40 kDa accessory protein) (P39) (32 kDa accessory protein).]                                                    | Other Go Component |
| <b>P18206</b> | Vinculin (Metavinculin).                                                                                                                                                                                                                                       | Other Go Component |
| <b>Q07001</b> | Acetylcholine receptor subunit delta precursor.                                                                                                                                                                                                                | Other Go Component |
| <b>P19021</b> | [Peptidyl-glycine alpha-amidating monooxygenase precursor (PAM), [Includes: Peptidylglycine alpha-hydroxylating monooxygenase, (EC 1.14.17.3) (PHM); Peptidyl-alpha-hydroxyglycine alpha-amidating, lyase (EC 4.3.2.5) (Peptidylamidoglycolate lyase) (PAL)].] | Other Go Component |
| <b>PO2461</b> | Collagen alpha-1(III) chain precursor.                                                                                                                                                                                                                         | Other Go Component |
| <b>P12109</b> | Collagen alpha-1(VI) chain precursor.                                                                                                                                                                                                                          | Other Go Component |
| <b>Q99715</b> | Collagen alpha-1(XII) chain precursor.                                                                                                                                                                                                                         | Other Go Component |
| <b>P39060</b> | Collagen alpha-1(XVIII) chain precursor [Contains: Endostatin].                                                                                                                                                                                                | Other Go Component |
| <b>PO5997</b> | Collagen alpha-2(V) chain precursor.                                                                                                                                                                                                                           | Other Go Component |
| <b>Q01955</b> | [Collagen alpha-3(IV) chain precursor (Goodpasture antigen) [Contains:, Tumstatin].]                                                                                                                                                                           | Other Go Component |
| <b>Q9NZU7</b> | Calcium-binding protein 1 (CaBP1) (Calbrain).                                                                                                                                                                                                                  | Other Go Component |
| <b>O00555</b> | [Voltage-dependent P/Q-type calcium channel subunit alpha-1A (Voltage-, gated calcium channel subunit alpha Cav2.1) (Calcium channel, L type,, alpha-1 polypeptide isoform 4) (Brain calcium channel I) (BI).]                                                 | Other Go Component |
| <b>P56747</b> | Claudin-6 (Skullin 2).                                                                                                                                                                                                                                         | Other Go Component |
| <b>P56856</b> | Claudin-18.                                                                                                                                                                                                                                                    | Other Go Component |
| <b>P98082</b> | Disabled homolog 2 (Differentially-expressed protein 2) (DOC-2).                                                                                                                                                                                               | Other Go Component |

|               |                                                                                                                                                                                                                        |                    |
|---------------|------------------------------------------------------------------------------------------------------------------------------------------------------------------------------------------------------------------------|--------------------|
| <b>Q92817</b> | [Envoplakin (210 kDa paraneoplastic pemphigus antigen) (p210) (210 kDa, cornified envelope precursor protein).]                                                                                                        | Other Go Component |
| <b>O75955</b> | Flotillin-1.                                                                                                                                                                                                           | Other Go Component |
| <b>Q9Y217</b> | [FYVE finger-containing phosphoinositide kinase (EC 2.7.1.68) (1-, phosphatidylinositol-4-phosphate 5-kinase) (Phosphatidylinositol-3-, phosphate 5-kinase type III) (PIP5K) (PtdIns(4)P-5-kinase) (PIKfyve), (p235).] | Other Go Component |
| <b>P12544</b> | [Granzyme A precursor (EC 3.4.21.78) (Cytotoxic T-lymphocyte proteinase, 1) (Hanukkah factor) (H factor) (HF) (Granzyme-1) (CTL tryptase), (Fragmentin-1).]                                                            | Other Go Component |
| <b>P07476</b> | Involucrin.                                                                                                                                                                                                            | Other Go Component |
| <b>P51884</b> | [Lumican precursor (Keratan sulfate proteoglycan lumican) (KSPG, lumican).]                                                                                                                                            | Other Go Component |
| <b>O00255</b> | Menin.                                                                                                                                                                                                                 | Other Go Component |
| <b>P51153</b> | Ras-related protein Rab-13 (Cell growth-inhibiting gene 4 protein).                                                                                                                                                    | Other Go Component |
| <b>P09661</b> | U2 small nuclear ribonucleoprotein A' (U2 snRNP-A').                                                                                                                                                                   | Other Go Component |
| <b>O75533</b> | [Splicing factor 3B subunit 1 (Spliceosome-associated protein 155) (SAP, 155) (SF3b155) (Pre-mRNA-splicing factor SF3b 155 kDa subunit).]                                                                              | Other Go Component |
| <b>O15020</b> | [Spectrin beta chain, brain 2 (Spectrin, non-erythroid beta chain 2), (Beta-III spectrin).]                                                                                                                            | Other Go Component |
| <b>P12814</b> | [Alpha-actinin-1 (Alpha-actinin cytoskeletal isoform) (Non-muscle, alpha-actinin-1) (F-actin cross-linking protein).]                                                                                                  | Other Go Component |
| <b>P43681</b> | Neuronal acetylcholine receptor subunit alpha-4 precursor.                                                                                                                                                             | Other Go Component |
| <b>Q05901</b> | Neuronal acetylcholine receptor subunit beta-3 precursor.                                                                                                                                                              | Other Go Component |
| <b>O43683</b> | [Mitotic checkpoint serine/threonine-protein kinase BUB1 (EC 2.7.11.1), (hBUB1) (BUB1A).]                                                                                                                              | Other Go Component |
| <b>P39059</b> | [Collagen alpha-1(XV) chain precursor [Contains: Endostatin, (Endostatin-XV) (Restin) (Related to endostatin)].]                                                                                                       | Other Go Component |
| <b>P12111</b> | Collagen alpha-3(VI) chain precursor.                                                                                                                                                                                  | Other Go Component |
| <b>P15088</b> | [Mast cell carboxypeptidase A precursor (EC 3.4.17.1) (MC-CPA), (Carboxypeptidase A3).]                                                                                                                                | Other Go Component |
| <b>P56746</b> | Claudin-15.                                                                                                                                                                                                            | Other Go Component |
| <b>P01040</b> | Cystatin-A (Stefin-A) (Cystatin-AS).                                                                                                                                                                                   | Other Go Component |
| <b>P15924</b> | Desmoplakin (DP) (250/210 kDa paraneoplastic pemphigus antigen).                                                                                                                                                       | Other Go Component |
| <b>P09172</b> | [Dopamine beta-hydroxylase precursor (EC 1.14.17.1) (Dopamine beta-, monooxygenase).]                                                                                                                                  | Other Go Component |
| <b>Q16643</b> | Drebrin (Developmentally-regulated brain protein).                                                                                                                                                                     | Other Go Component |
| <b>Q02413</b> | [Desmoglein-1 precursor (Desmosomal glycoprotein 1) (DG1) (DGI), (Pemphigus foliaceus antigen).]                                                                                                                       | Other Go Component |
| <b>P01880</b> | Ig delta chain C region.                                                                                                                                                                                               | Other Go Component |
| <b>Q9UI46</b> | [Dynein intermediate chain 1, axonemal (Axonemal dynein intermediate, chain 1).]                                                                                                                                       | Other Go Component |
| <b>Q9P0M6</b> | Core histone macro-H2A.2 (Histone macroH2A2) (mH2A2).                                                                                                                                                                  | Other Go Component |
| <b>P06239</b> | [Proto-oncogene tyrosine-protein kinase LCK (EC 2.7.10.2) (p56-LCK), (Lymphocyte cell-specific protein-tyrosine kinase) (LSK) (T cell-, specific protein-tyrosine kinase).]                                            | Other Go Component |
| <b>Q16363</b> | Laminin subunit alpha-4 precursor.                                                                                                                                                                                     | Other Go Component |
| <b>Q05586</b> | [Glutamate [NMDA] receptor subunit zeta-1 precursor (N-methyl-D-, aspartate receptor subunit NR1).]                                                                                                                    | Other Go Component |
| <b>Q92730</b> | [Rho-related GTP-binding protein Rho6 precursor (Rho family GTPase 1), (Rnd1).]                                                                                                                                        | Other Go Component |
| <b>Q15459</b> | [Splicing factor 3 subunit 1 (Spliceosome-associated protein 114) (SAP, 114) (SF3a120).]                                                                                                                               | Other Go Component |
| <b>P00441</b> | Superoxide dismutase [Cu-Zn] (EC 1.15.1.1).                                                                                                                                                                            | Other Go Component |
| <b>P14410</b> | [Sucrase-isomaltase, intestinal [Contains: Sucrase (EC 3.2.1.48);, Isomaltase (EC 3.2.1.10)].]                                                                                                                         | Other Go Component |

|               |                                                                                                                                                                                                                                                                                                                   |                    |
|---------------|-------------------------------------------------------------------------------------------------------------------------------------------------------------------------------------------------------------------------------------------------------------------------------------------------------------------|--------------------|
| <b>Q15696</b> | [U2 small nuclear ribonucleoprotein auxiliary factor 35 kDa subunit-, related protein 2 (U2(RNU2) small nuclear RNA auxiliary factor 1-like, 2) (CCCH type zinc finger, RNA-binding motif and serine/arginine rich, protein 2) (Renal carcinoma antigen NY-REN-20).]                                              | Other Go Component |
| <b>Q9ULB5</b> | Cadherin-7 precursor.                                                                                                                                                                                                                                                                                             | Other Membrane     |
| <b>P12830</b> | [Epithelial-cadherin precursor (E-cadherin) (Uvomorulin) (Cadherin-1), (CAM 120/80) (CD324 antigen) [Contains: E-Cad/CTF1; E-Cad/CTF2; E-, Cad/CTF3].]                                                                                                                                                            | Other Membrane     |
| <b>O15259</b> | Nephrocystin-1 (Juvenile nephronophthisis 1 protein).                                                                                                                                                                                                                                                             | Other Membrane     |
| <b>P26439</b> | [3 beta-hydroxysteroid dehydrogenase/Delta 5-->4-isomerase type II (3-, beta-HSD II) [Includes: 3-beta-hydroxy-Delta(5)-steroid dehydrogenase, (EC 1.1.1.145) (3-beta-hydroxy-5-ene steroid dehydrogenase), (Progesterone reductase); Steroid Delta-isomerase (EC 5.3.3.1) (Delta-, 5-3-ketosteroid isomerase)].] | Other Membrane     |
| <b>Q99758</b> | [ATP-binding cassette sub-family A member 3 (ATP-binding cassette, transporter 3) (ATP-binding cassette 3) (ABC-C transporter).]                                                                                                                                                                                  | Other Membrane     |
| <b>Q9P0K1</b> | [ADAM 22 precursor (A disintegrin and metalloproteinase domain 22), (Metalloproteinase-like, disintegrin-like, and cysteine-rich protein, 2) (Metalloproteinase-disintegrin ADAM22-3).]                                                                                                                           | Other Membrane     |
| <b>P51693</b> | Amyloid-like protein 1 precursor (APLP) (APLP-1) [Contains: C30].                                                                                                                                                                                                                                                 | Other Membrane     |
| <b>Q10588</b> | [ADP-ribosyl cyclase 2 precursor (EC 3.2.2.5) (Cyclic ADP-ribose, hydrolase 2) (cADPr hydrolase 2) (Bone marrow stromal antigen 1) (BST-, 1) (CD157 antigen).]                                                                                                                                                    | Other Membrane     |
| <b>Q9Y6N8</b> | Cadherin-10 precursor (T2-cadherin).                                                                                                                                                                                                                                                                              | Other Membrane     |
| <b>Q9H159</b> | Cadherin-19 precursor.                                                                                                                                                                                                                                                                                            | Other Membrane     |
| <b>Q00973</b> | [Beta-1,4 N-acetylgalactosaminyltransferase 1 (EC 2.4.1.92) ((N-, acetylneuraminy)-galactosylglucosylceramide) (GM2/GD2 synthase), (GalNAc-T).]                                                                                                                                                                   | Other Membrane     |
| <b>Q9ULX7</b> | [Carbonic anhydrase 14 precursor (EC 4.2.1.1) (Carbonic anhydrase XIV), (Carbonate dehydratase XIV) (CA-XIV).]                                                                                                                                                                                                    | Other Membrane     |
| <b>Q13936</b> | [Voltage-dependent L-type calcium channel subunit alpha-1C (Voltage-, gated calcium channel subunit alpha Cav1.2) (Calcium channel, L type,., alpha-1 polypeptide, isoform 1, cardiac muscle).]                                                                                                                   | Other Membrane     |
| <b>P13987</b> | [CD59 glycoprotein precursor (Membrane attack complex inhibition, factor) (MACIF) (MAC-inhibitory protein) (MAC-IP) (Protectin) (MEM43, antigen) (Membrane inhibitor of reactive lysis) (MIRL) (20 kDa, homologous restriction factor) (HRF-20) (HRF20) (1F5 antigen).]                                           | Other Membrane     |
| <b>Q9Y5E1</b> | Protocadherin beta 9 precursor (PCDH-beta9) (Protocadherin 3H).                                                                                                                                                                                                                                                   | Other Membrane     |
| <b>Q9Y5E9</b> | Protocadherin beta 14 precursor (PCDH-beta14).                                                                                                                                                                                                                                                                    | Other Membrane     |
| <b>P10643</b> | Complement component C7 precursor.                                                                                                                                                                                                                                                                                | Other Membrane     |
| <b>Q12860</b> | [Contactin-1 precursor (Neural cell surface protein F3) (Glycoprotein, gp135).]                                                                                                                                                                                                                                   | Other Membrane     |
| <b>Q9NYJ7</b> | Delta-like protein 3 precursor (Drosophila Delta homolog 3).                                                                                                                                                                                                                                                      | Other Membrane     |
| <b>P43003</b> | [Excitatory amino acid transporter 1 (Solute carrier family 1 member 3), (Sodium-dependent glutamate/aspartate transporter 1) (GLAST-1).]                                                                                                                                                                         | Other Membrane     |
| <b>PO1859</b> | Ig gamma-2 chain C region.                                                                                                                                                                                                                                                                                        | Other Membrane     |
| <b>PO4233</b> | [HLA class II histocompatibility antigen gamma chain (HLA-DR antigens-, associated invariant chain) (Ia antigen-associated invariant chain), (Ii) (p33) (CD74 antigen).]                                                                                                                                          | Other Membrane     |
| <b>P15814</b> | [Immunoglobulin lambda-like polypeptide 1 precursor (Immunoglobulin-, related protein 14.1) (Immunoglobulin omega polypeptide) (Ig lambda-5), (CD179b antigen).]                                                                                                                                                  | Other Membrane     |
| <b>Q92504</b> | [Zinc transporter SLC39A7 (Solute carrier family 39 member 7), (Histidine-rich membrane protein Ke4).]                                                                                                                                                                                                            | Other Membrane     |
| <b>PO8922</b> | [Proto-oncogene tyrosine-protein kinase ROS precursor (EC 2.7.10.1) (c-, ros-1).]                                                                                                                                                                                                                                 | Other Membrane     |
| <b>P24043</b> | [Laminin subunit alpha-2 precursor (Laminin M chain) (Merosin heavy, chain).]                                                                                                                                                                                                                                     | Other Membrane     |

|               |                                                                                                                                                                                                                     |                |
|---------------|---------------------------------------------------------------------------------------------------------------------------------------------------------------------------------------------------------------------|----------------|
| <b>P53985</b> | [Monocarboxylate transporter 1 (MCT 1) (Solute carrier family 16 member, 1).]                                                                                                                                       | Other Membrane |
| <b>P01871</b> | Ig mu chain C region.                                                                                                                                                                                               | Other Membrane |
| <b>P13591</b> | [Neural cell adhesion molecule 1, 140 kDa isoform precursor (N-CAM 140), (NCAM-140) (CD56 antigen).]                                                                                                                | Other Membrane |
| <b>Q14112</b> | Nidogen-2 precursor (NID-2) (Osteonidogen).                                                                                                                                                                         | Other Membrane |
| <b>P29475</b> | [Nitric-oxide synthase, brain (EC 1.14.13.39) (NOS type I) (Neuronal, NOS) (N-NOS) (nNOS) (Constitutive NOS) (NC-NOS) (bNOS).]                                                                                      | Other Membrane |
| <b>O60462</b> | [Neuropilin-2 precursor (Vascular endothelial cell growth factor 165, receptor 2).]                                                                                                                                 | Other Membrane |
| <b>P46531</b> | [Neurogenic locus notch homolog protein 1 precursor (Notch 1) (hN1), (Translocation-associated notch protein TAN-1) [Contains: Notch 1, extracellular truncation; Notch 1 intracellular domain].]                   | Other Membrane |
| <b>P43657</b> | [P2Y purinoceptor 5 (P2Y5) (Purinergic receptor 5) (RB intron encoded, G-protein coupled receptor).]                                                                                                                | Other Membrane |
| <b>O75381</b> | [Peroxisomal membrane protein PEX14 (Peroxin-14) (Peroxisomal membrane, anchor protein PEX14) (PTS1 receptor docking protein).]                                                                                     | Other Membrane |
| <b>P13686</b> | [Tartrate-resistant acid phosphatase type 5 precursor (EC 3.1.3.2) (TR-, AP) (Tartrate-resistant acid ATPase) (TrATPase) (Acid phosphatase 5, tartrate resistant).]                                                 | Other Membrane |
| <b>P29350</b> | [Tyrosine-protein phosphatase non-receptor type 6 (EC 3.1.3.48), (Protein-tyrosine phosphatase 1C) (PTP-1C) (Hematopoietic cell, protein-tyrosine phosphatase) (SH-PTP1) (Protein-tyrosine phosphatase, SHP-1).]    | Other Membrane |
| <b>Q15286</b> | Ras-related protein Rab-35 (Rab-1C) (GTP-binding protein RAY).                                                                                                                                                      | Other Membrane |
| <b>O95487</b> | Protein transport protein Sec24B (SEC24-related protein B).                                                                                                                                                         | Other Membrane |
| <b>Q9NRC6</b> | [Spectrin beta chain, brain 4 (Spectrin, non-erythroid beta chain 4), (Beta-V spectrin) (BSPECV).]                                                                                                                  | Other Membrane |
| <b>P08240</b> | [Signal recognition particle receptor subunit alpha (SR-alpha) (Docking, protein alpha) (DP-alpha).]                                                                                                                | Other Membrane |
| <b>P56180</b> | [Putative tyrosine-protein phosphatase TPTE (EC 3.1.3.48), (Transmembrane phosphatase with tensin homology) (Protein BJ-HCC-5).]                                                                                    | Other Membrane |
| <b>Q9UPY5</b> | [Cystine/glutamate transporter (Amino acid transport system xc-) (xCT), (Calcium channel blocker resistance protein CCB1).]                                                                                         | Other Membrane |
| <b>Q9Y2Q0</b> | [Probable phospholipid-transporting ATPase IA (EC 3.6.3.1) (Chromaffin, granule ATPase II) (ATPase class I type 8A member 1).]                                                                                      | Other Membrane |
| <b>P28288</b> | [ATP-binding cassette sub-family D member 3 (70 kDa peroxisomal, membrane protein) (PMP70).]                                                                                                                        | Other Membrane |
| <b>P12821</b> | [Angiotensin-converting enzyme, somatic isoform precursor (EC 3.4.15.1), (Dipeptidyl carboxypeptidase I) (Kininase II) (CD143 antigen), [Contains: Angiotensin-converting enzyme, somatic isoform, soluble, form].] | Other Membrane |
| <b>Q9GZZ6</b> | [Neuronal acetylcholine receptor subunit alpha-10 precursor (Nicotinic, acetylcholine receptor subunit alpha 10) (NACHR alpha 10).]                                                                                 | Other Membrane |
| <b>Q9UKF2</b> | [ADAM 30 precursor (EC 3.4.24.-) (A disintegrin and metalloproteinase, domain 30).]                                                                                                                                 | Other Membrane |
| <b>P01877</b> | Ig alpha-2 chain C region.                                                                                                                                                                                          | Other Membrane |
| <b>Q06481</b> | [Amyloid-like protein 2 precursor (Amyloid protein homolog) (APPH), (CDEI box-binding protein) (CDEBP).]                                                                                                            | Other Membrane |
| <b>P04920</b> | [Anion exchange protein 2 (Non-erythroid band 3-like protein) (AE2, anion exchanger) (Solute carrier family 4 member 2) (BND3L).]                                                                                   | Other Membrane |
| <b>P32247</b> | Bombesin receptor subtype-3 (BRS-3).                                                                                                                                                                                | Other Membrane |
| <b>P55287</b> | Cadherin-11 precursor (Osteoblast-cadherin) (OB-cadherin) (OSF-4).                                                                                                                                                  | Other Membrane |
| <b>Q9HBT6</b> | Cadherin-20 precursor.                                                                                                                                                                                              | Other Membrane |
| <b>Q03135</b> | Caveolin-1.                                                                                                                                                                                                         | Other Membrane |
| <b>Q9Y5E4</b> | Protocadherin beta 5 precursor (PCDH-beta5).                                                                                                                                                                        | Other Membrane |
| <b>Q9UN67</b> | Protocadherin beta 10 precursor (PCDH-beta10).                                                                                                                                                                      | Other Membrane |
| <b>O95069</b> | [Potassium channel subfamily K member 2 (Outward rectifying potassium, channel protein TREK-1) (TREK-1 K(+)) (channel subunit) (Two pore, potassium channel TPKC1) (Two pore domain potassium channel TREK-1).]     | Other Membrane |

|               |                                                                                                                                                                                                                                                                                                                 |                |
|---------------|-----------------------------------------------------------------------------------------------------------------------------------------------------------------------------------------------------------------------------------------------------------------------------------------------------------------|----------------|
| <b>P26992</b> | Ciliary neurotrophic factor receptor alpha precursor (CNTFR alpha).                                                                                                                                                                                                                                             | Other Membrane |
| <b>P09603</b> | [Macrophage colony-stimulating factor 1 precursor (CSF-1) (MCSF) (M-, CSF) (Lanimostim) [Contains: Processed macrophage colony-stimulating, factor 1].]                                                                                                                                                         | Other Membrane |
| <b>O00341</b> | [Excitatory amino acid transporter 5 (Solute carrier family 1 member 7), (Retinal glutamate transporter).]                                                                                                                                                                                                      | Other Membrane |
| <b>P42345</b> | [FKBP12-rapamycin complex-associated protein (FK506-binding protein 12-, rapamycin complex-associated protein 1) (Rapamycin target protein), (RAPT1) (Mammalian target of rapamycin) (mTOR).]                                                                                                                   | Other Membrane |
| <b>P23945</b> | [Follicle-stimulating hormone receptor precursor (FSH-R) (Follitropin, receptor).]                                                                                                                                                                                                                              | Other Membrane |
| <b>Q99928</b> | [Gamma-aminobutyric-acid receptor subunit gamma-3 precursor (GABA(A), receptor subunit gamma-3).]                                                                                                                                                                                                               | Other Membrane |
| <b>P01860</b> | Ig gamma-3 chain C region (Heavy chain disease protein) (HDC).                                                                                                                                                                                                                                                  | Other Membrane |
| <b>P26572</b> | [Alpha-1,3-mannosyl-glycoprotein 2-beta-N-acetylglucosaminyltransferase, (EC 2.4.1.101) (N-glycosyl-oligosaccharide-glycoprotein N-, acetylglucosaminyltransferase I) (GNT-I) (GlcNAc-T I).]                                                                                                                    | Other Membrane |
| <b>P52849</b> | [Bifunctional heparan sulfate N-deacetylase/N-sulfotransferase 2, (EC 2.8.2.8) (Glucosaminyl N-deacetylase/N-sulfotransferase 2) (NDST-, 2) (N-heparan sulfate sulfotransferase 2) (N-HSST 2) [Includes:, Heparan sulfate N-deacetylase 2 (EC 3.-.-.-); Heparan sulfate N-, sulfotransferase 2 (EC 2.8.2.-).].] | Other Membrane |
| <b>Q16787</b> | [Laminin subunit alpha-3 precursor (Epiligrin 170 kDa subunit) (E170), (Nicein subunit alpha).]                                                                                                                                                                                                                 | Other Membrane |
| <b>P35410</b> | Mas-related G-protein coupled receptor MRG (MAS-R) (MAS1-like).                                                                                                                                                                                                                                                 | Other Membrane |
| <b>P04220</b> | Ig mu heavy chain disease protein (BOT).                                                                                                                                                                                                                                                                        | Other Membrane |
| <b>P19634</b> | [Sodium/hydrogen exchanger 1 (Na(+)/H(+) exchanger 1) (NHE-1) (Solute, carrier family 9 member 1) (Na(+)/H(+) antiporter, amiloride-, sensitive) (APNH).]                                                                                                                                                       | Other Membrane |
| <b>Q9Y5P0</b> | Olfactory receptor 51B4 (Odorant receptor HOR5'beta1).                                                                                                                                                                                                                                                          | Other Membrane |
| <b>P51805</b> | Plexin-A3 precursor (Plexin-4) (Semaphorin receptor SEX).                                                                                                                                                                                                                                                       | Other Membrane |
| <b>Q15437</b> | Protein transport protein Sec23B (SEC23-related protein B).                                                                                                                                                                                                                                                     | Other Membrane |
| <b>Q02223</b> | [Tumor necrosis factor receptor superfamily member 17 (B-cell, maturation protein) (CD269 antigen).]                                                                                                                                                                                                            | Other Membrane |
| <b>Q13061</b> | Triadin.                                                                                                                                                                                                                                                                                                        | Other Membrane |
| <b>Q16864</b> | [Vacuolar ATP synthase subunit F (EC 3.6.3.14) (V-ATPase subunit F), (Vacuolar proton pump subunit F) (V-ATPase 14 kDa subunit).]                                                                                                                                                                               | Other Membrane |
| <b>O76024</b> | Wolframin.                                                                                                                                                                                                                                                                                                      | Other Membrane |
| <b>O14524</b> | Uncharacterized membrane protein KIAA0286.                                                                                                                                                                                                                                                                      | Other Membrane |
| <b>Q9P241</b> | Probable phospholipid-transporting ATPase VD (EC 3.6.3.1) (ATPVD).                                                                                                                                                                                                                                              | Other Membrane |
| <b>P78363</b> | [Retinal-specific ATP-binding cassette transporter (ATP-binding, cassette sub-family A member 4) (RIM ABC transporter) (RIM protein), (RmP) (Stargardt disease protein).]                                                                                                                                       | Other Membrane |
| <b>O14983</b> | [Sarcoplasmic/endoplasmic reticulum calcium ATPase 1 (EC 3.6.3.8), (Calcium pump 1) (SERCA1) (SR Ca(2+)-ATPase 1) (Calcium-transporting, ATPase sarcoplasmic reticulum type, fast twitch skeletal muscle, isoform) (Endoplasmic reticulum class 1/2 Ca(2+) ATPase).]                                            | Other Membrane |
| <b>O60242</b> | Brain-specific angiogenesis inhibitor 3 precursor.                                                                                                                                                                                                                                                              | Other Membrane |
| <b>Q03001</b> | [Bullous pemphigoid antigen 1, isoforms 1/2/3/4/5/8 (230 kDa bullous, pemphigoid antigen) (BPA) (Hemidesmosomal plaque protein) (Dystonia, musculorum protein) (Dystonin) (Fragment).]                                                                                                                          | Other Membrane |
| <b>O15165</b> | Uncharacterized protein C18orf1.                                                                                                                                                                                                                                                                                | Other Membrane |
| <b>Q02388</b> | [Collagen alpha-1(VII) chain precursor (Long-chain collagen) (LC, collagen).]                                                                                                                                                                                                                                   | Other Membrane |

|               |                                                                                                                                                                                                                                                                                              |                |
|---------------|----------------------------------------------------------------------------------------------------------------------------------------------------------------------------------------------------------------------------------------------------------------------------------------------|----------------|
| <b>P33151</b> | [Cadherin-5 precursor (Vascular endothelial-cadherin) (VE-cadherin), (7B4 antigen) (CD144 antigen).]                                                                                                                                                                                         | Other Membrane |
| <b>Q9ULB4</b> | Cadherin-9 precursor.                                                                                                                                                                                                                                                                        | Other Membrane |
| <b>P55289</b> | [Cadherin-12 precursor (Brain-cadherin) (BR-cadherin) (N-cadherin 2), (Neural type cadherin 2).]                                                                                                                                                                                             | Other Membrane |
| <b>Q9H251</b> | Cadherin-23 precursor (Otocadherin).                                                                                                                                                                                                                                                         | Other Membrane |
| <b>O60840</b> | [Voltage-dependent L-type calcium channel subunit alpha-1F (Voltage-, gated calcium channel subunit alpha Cav1.4).]                                                                                                                                                                          | Other Membrane |
| <b>Q9Y5E2</b> | Protocadherin beta 7 precursor (PCDH-beta7).                                                                                                                                                                                                                                                 | Other Membrane |
| <b>O95674</b> | [Phosphatidate cytidyltransferase 2 (EC 2.7.7.41) (CDP-diglyceride, synthetase 2) (CDP-diglyceride pyrophosphorylase 2) (CDP-, diacylglycerol synthase 2) (CDS 2) (CTP:phosphatidate, cytidyltransferase 2) (CDP-DAG synthase 2) (CDP-DG synthetase 2).]                                     | Other Membrane |
| <b>O75746</b> | [Calcium-binding mitochondrial carrier protein Aralar1 (Mitochondrial, aspartate glutamate carrier 1) (Solute carrier family 25 member 12).]                                                                                                                                                 | Other Membrane |
| <b>P07358</b> | [Complement component C8 beta chain precursor (Complement component 8, subunit beta).]                                                                                                                                                                                                       | Other Membrane |
| <b>P81408</b> | Protein COTE1.                                                                                                                                                                                                                                                                               | Other Membrane |
| <b>P51843</b> | [Nuclear receptor 0B1 (Nuclear receptor DAX-1) (DSS-AHC critical region, on the X chromosome protein 1).]                                                                                                                                                                                    | Other Membrane |
| <b>Q99848</b> | [Probable rRNA-processing protein EBP2 (EBNA1-binding protein 2), (Nucleolar protein p40).]                                                                                                                                                                                                  | Other Membrane |
| <b>P35555</b> | Fibrillin-1 precursor.                                                                                                                                                                                                                                                                       | Other Membrane |
| <b>P01857</b> | Ig gamma-1 chain C region.                                                                                                                                                                                                                                                                   | Other Membrane |
| <b>P01861</b> | Ig gamma-4 chain C region.                                                                                                                                                                                                                                                                   | Other Membrane |
| <b>P48146</b> | Neuropeptides B/W receptor type 2 (G-protein coupled receptor 8).                                                                                                                                                                                                                            | Other Membrane |
| <b>O95528</b> | [Solute carrier family 2, facilitated glucose transporter member 10, (Glucose transporter type 10) (GLUT-10).]                                                                                                                                                                               | Other Membrane |
| <b>P11166</b> | [Solute carrier family 2, facilitated glucose transporter member 1, (Glucose transporter type 1, erythrocyte/brain) (GLUT-1) (HepG2, glucose transporter).]                                                                                                                                  | Other Membrane |
| <b>Q9H3N8</b> | [Histamine H4 receptor (HH4R) (GPRv53) (G-protein coupled receptor 105), (SP9144) (AXOR35).]                                                                                                                                                                                                 | Other Membrane |
| <b>P52790</b> | Hexokinase-3 (EC 2.7.1.1) (Hexokinase type III) (HK III).                                                                                                                                                                                                                                    | Other Membrane |
| <b>P32019</b> | [Type II inositol-1,4,5-trisphosphate 5-phosphatase precursor, (EC 3.1.3.36) (Phosphoinositide 5-phosphatase) (5PTase) (75 kDa, inositol polyphosphate-5-phosphatase).]                                                                                                                      | Other Membrane |
| <b>Q14773</b> | [Intercellular adhesion molecule 4 precursor (ICAM-4) (Landsteiner-, Wiener blood group glycoprotein) (LW blood group protein) (CD242, antigen).]                                                                                                                                            | Other Membrane |
| <b>Q14954</b> | [Killer cell immunoglobulin-like receptor 2DS1 precursor (MHC class I, NK cell receptor Eb6 ActI) (CD158h antigen).]                                                                                                                                                                         | Other Membrane |
| <b>P17252</b> | Protein kinase C alpha type (EC 2.7.11.13) (PKC-alpha) (PKC-A).                                                                                                                                                                                                                              | Other Membrane |
| <b>P12956</b> | [ATP-dependent DNA helicase 2 subunit 1 (ATP-dependent DNA helicase II, 70 kDa subunit) (Lupus Ku autoantigen protein p70) (Ku70) (70 kDa, subunit of Ku antigen) (Thyroid-lupus autoantigen) (TLAA) (CTC box-, binding factor 75 kDa subunit) (CTCBF) (CTC75) (DNA-repair protein, XRCC6).] | Other Membrane |
| <b>Q16873</b> | [Leukotriene C4 synthase (EC 4.4.1.20) (Leukotriene-C(4) synthase), (LTC4 synthase).]                                                                                                                                                                                                        | Other Membrane |
| <b>Q13491</b> | Neuronal membrane glycoprotein M6-b (M6b).                                                                                                                                                                                                                                                   | Other Membrane |
| <b>Q15049</b> | Membrane protein MLC1.                                                                                                                                                                                                                                                                       | Other Membrane |
| <b>Q9NZW5</b> | MAGUK p55 subfamily member 6 (Veli-associated MAGUK 1) (VAM-1).                                                                                                                                                                                                                              | Other Membrane |
| <b>Q93070</b> | [Ecto-ADP-ribosyltransferase 4 precursor (EC 2.4.2.31) (NAD(P)(+)-, arginine ADP-ribosyltransferase 4) (Mono(ADP-ribosyl)transferase 4), (Dombrock blood group carrier molecule) (CD297 antigen).]                                                                                           | Other Membrane |
| <b>O15394</b> | Neural cell adhesion molecule 2 precursor (N-CAM 2).                                                                                                                                                                                                                                         | Other Membrane |

|               |                                                                                                                                                                                                                                                                                                                                                                                  |                 |
|---------------|----------------------------------------------------------------------------------------------------------------------------------------------------------------------------------------------------------------------------------------------------------------------------------------------------------------------------------------------------------------------------------|-----------------|
| <b>Q9Y585</b> | [Olfactory receptor 1A2 (Olfactory receptor OR17-10) (Olfactory, receptor 17-6) (OR17-6).]                                                                                                                                                                                                                                                                                       | Other Membrane  |
| <b>P29728</b> | [2'-5'-oligoadenylate synthetase 2 (EC 2.7.7.-) ((2-5')oligo(A), synthetase 2) (2-5A synthetase 2) (p69 OAS / p71 OAS) (p69OAS / , p71OAS).]                                                                                                                                                                                                                                     | Other Membrane  |
| <b>P09131</b> | P3 protein (Solute carrier family 10 member 3).                                                                                                                                                                                                                                                                                                                                  | Other Membrane  |
| <b>Q13258</b> | Prostaglandin D2 receptor (Prostanoid DP receptor) (PGD receptor).                                                                                                                                                                                                                                                                                                               | Other Membrane  |
| <b>Q9UBV2</b> | Sel-1 homolog precursor (Suppressor of lin-12-like protein) (Sel-1L).                                                                                                                                                                                                                                                                                                            | Other Membrane  |
| <b>Q13813</b> | [Spectrin alpha chain, brain (Spectrin, non-erythroid alpha chain), (Alpha-II spectrin) (Fodrin alpha chain).]                                                                                                                                                                                                                                                                   | Other Membrane  |
| <b>Q9UKR8</b> | [Tetraspanin-16 (Tspan-16) (Transmembrane 4 superfamily member 16), (Tetraspanin TM4-B).]                                                                                                                                                                                                                                                                                        | Other Membrane  |
| <b>Q9UKP6</b> | Urotensin II receptor (UR-II-R) (G-protein coupled receptor 14).                                                                                                                                                                                                                                                                                                                 | Other Membrane  |
| <b>P54219</b> | [Chromaffin granule amine transporter (Vesicular amine transporter 1), (VAT1) (Solute carrier family 18 member 1).]                                                                                                                                                                                                                                                              | Other Membrane  |
| <b>P55808</b> | Glycoprotein Xg precursor (Protein PBDX).                                                                                                                                                                                                                                                                                                                                        | Other Membrane  |
| <b>P49447</b> | Cytochrome b561 (Cytochrome b-561).                                                                                                                                                                                                                                                                                                                                              | Plasma Membrane |
| <b>P21453</b> | [Sphingosine 1-phosphate receptor Edg-1 (Sphingosine 1-phosphate, receptor 1) (S1P1).]                                                                                                                                                                                                                                                                                           | Plasma Membrane |
| <b>Q13368</b> | MAGUK p55 subfamily member 3 (Protein MPP3) (Discs large homolog 3).                                                                                                                                                                                                                                                                                                             | Plasma Membrane |
| <b>P20648</b> | [Potassium-transporting ATPase alpha chain 1 (EC 3.6.3.10) (Proton, pump) (Gastric H(+)/K(+) ATPase subunit alpha).]                                                                                                                                                                                                                                                             | Plasma Membrane |
| <b>P21453</b> | [Sphingosine 1-phosphate receptor Edg-1 (Sphingosine 1-phosphate, receptor 1) (S1P1).]                                                                                                                                                                                                                                                                                           | Plasma Membrane |
| <b>Q14542</b> | [Equilibrative nucleoside transporter 2 (Equilibrative, nitrobenzylmercaptapurine riboside-insensitive nucleoside transporter), (Equilibrative NBMPR-insensitive nucleoside transporter) (Nucleoside, transporter, ei-type) (Solute carrier family 29 member 2) (36 kDa, nucleolar protein HNP36) (Hydrophobic nucleolar protein, 36 kDa), (Delayed-early response protein 12).] | Plasma Membrane |
| <b>O15552</b> | Free fatty acid receptor 2 (G-protein coupled receptor 43).                                                                                                                                                                                                                                                                                                                      | Plasma Membrane |
| <b>P41595</b> | 5-hydroxytryptamine 2B receptor (5-HT-2B) (Serotonin receptor 2B).                                                                                                                                                                                                                                                                                                               | Plasma Membrane |
| <b>P11230</b> | Acetylcholine receptor subunit beta precursor.                                                                                                                                                                                                                                                                                                                                   | Plasma Membrane |
| <b>P08172</b> | Muscarinic acetylcholine receptor M2.                                                                                                                                                                                                                                                                                                                                            | Plasma Membrane |
| <b>Q99965</b> | [ADAM 2 precursor (A disintegrin and metalloproteinase domain 2), (Fertilin subunit beta) (PH-30) (PH30).]                                                                                                                                                                                                                                                                       | Plasma Membrane |
| <b>Q07075</b> | [Glutamyl aminopeptidase (EC 3.4.11.7) (EAP) (Aminopeptidase A) (APA), (Differentiation antigen gp160) (CD249 antigen).]                                                                                                                                                                                                                                                         | Plasma Membrane |
| <b>P20594</b> | [Atrial natriuretic peptide receptor B precursor (ANP-B) (ANPRB) (GC-B), (Guanylate cyclase B) (EC 4.6.1.2) (NPR-B) (Atrial natriuretic peptide, B-type receptor).]                                                                                                                                                                                                              | Plasma Membrane |
| <b>O76027</b> | Annexin A9 (Annexin-9) (Annexin-31) (Annexin XXXI) (Pemphaxin).                                                                                                                                                                                                                                                                                                                  | Plasma Membrane |
| <b>P35414</b> | [Apelin receptor (G-protein coupled receptor APJ) (Angiotensin, receptor-like 1) (HG11).]                                                                                                                                                                                                                                                                                        | Plasma Membrane |
| <b>Q04656</b> | [Copper-transporting ATPase 1 (EC 3.6.3.4) (Copper pump 1) (Menkes, disease-associated protein).]                                                                                                                                                                                                                                                                                | Plasma Membrane |
| <b>Q9UN42</b> | [X/potassium-transporting ATPase subunit beta-m (X,K-ATPase beta-m, subunit).]                                                                                                                                                                                                                                                                                                   | Plasma Membrane |
| <b>Q16515</b> | [Amiloride-sensitive cation channel 1, neuronal (Amiloride-sensitive, brain sodium channel) (Amiloride-sensitive cation channel neuronal 1), (Acid-sensing ion channel 2) (ASIC2) (Brain sodium channel 1) (BNaC1), (BNC1) (Mammalian degenerin homolog).]                                                                                                                       | Plasma Membrane |
| <b>P17213</b> | Bactericidal permeability-increasing protein precursor (BPI) (CAP 57).                                                                                                                                                                                                                                                                                                           | Plasma Membrane |
| <b>P48509</b> | [CD151 antigen (Platelet-endothelial tetraspan antigen 3) (PETA-3), (GP27) (Membrane glycoprotein SFA-1) (Tetraspanin-24) (Tspan-24).]                                                                                                                                                                                                                                           | Plasma Membrane |
| <b>Q16581</b> | C3a anaphylatoxin chemotactic receptor (C3a-R) (C3AR).                                                                                                                                                                                                                                                                                                                           | Plasma Membrane |



|               |                                                                                                                                                                                                                |                 |
|---------------|----------------------------------------------------------------------------------------------------------------------------------------------------------------------------------------------------------------|-----------------|
| <b>P16870</b> | [Carboxypeptidase E precursor (EC 3.4.17.10) (CPE) (Carboxypeptidase H), (CPH) (Enkephalin convertase) (Prohormone-processing, carboxypeptidase).]                                                             | Plasma Membrane |
| <b>Q9UBN1</b> | [Voltage-dependent calcium channel gamma-4 subunit (Neuronal voltage-, gated calcium channel gamma-4 subunit).]                                                                                                | Plasma Membrane |
| <b>P51677</b> | [C-C chemokine receptor type 3 (C-C CKR-3) (CC-CKR-3) (CCR-3) (CCR3), (CKR3) (Eosinophil eotaxin receptor) (CD193 antigen).]                                                                                   | Plasma Membrane |
| <b>PO6126</b> | [T-cell surface glycoprotein CD1a precursor (CD1a antigen) (T-cell, surface antigen T6/Leu-6) (hTa1 thymocyte antigen).]                                                                                       | Plasma Membrane |
| <b>Q01151</b> | [CD83 antigen precursor (Cell surface protein HB15) (B-cell activation, protein).]                                                                                                                             | Plasma Membrane |
| <b>Q9Y5H9</b> | Protocadherin alpha 2 precursor (PCDH-alpha2).                                                                                                                                                                 | Plasma Membrane |
| <b>Q9Y5H7</b> | Protocadherin alpha 5 precursor (PCDH-alpha5).                                                                                                                                                                 | Plasma Membrane |
| <b>P13569</b> | [Cystic fibrosis transmembrane conductance regulator (CFTR) (cAMP-, dependent chloride channel) (ATP-binding cassette transporter sub-, family C member 7).]                                                   | Plasma Membrane |
| <b>P51801</b> | Chloride channel protein CIC-Kb (Chloride channel Kb) (CIC-K2).                                                                                                                                                | Plasma Membrane |
| <b>Q99250</b> | [Sodium channel protein type 2 subunit alpha (Sodium channel protein, type II subunit alpha) (Voltage-gated sodium channel subunit alpha, Nav1.2) (Sodium channel protein, brain II subunit alpha) (HBSC II).] | Plasma Membrane |
| <b>O95279</b> | [Potassium channel subfamily K member 5 (Acid-sensitive potassium, channel protein TASK-2) (TWIK-related acid-sensitive K(+) channel 2).]                                                                      | Plasma Membrane |
| <b>O00590</b> | [Chemokine-binding protein 2 (Chemokine-binding protein D6) (C-C, chemokine receptor D6) (Chemokine receptor CCR-9) (Chemokine receptor, CCR-10).]                                                             | Plasma Membrane |
| <b>P51686</b> | [C-C chemokine receptor type 9 (C-C CKR-9) (CC-CKR-9) (CCR-9) (GPR-9-6), (G-protein coupled receptor 28) (CDw199 antigen).]                                                                                    | Plasma Membrane |
| <b>Q9UJS0</b> | [Calcium-binding mitochondrial carrier protein Aralar2 (Mitochondrial, aspartate glutamate carrier 2) (Solute carrier family 25 member 13), (Citrin).]                                                         | Plasma Membrane |
| <b>Q9NYX4</b> | D1 dopamine receptor-interacting protein calcyon.                                                                                                                                                              | Plasma Membrane |
| <b>P21918</b> | [D(1B) dopamine receptor (D(5) dopamine receptor) (D1beta dopamine, receptor).]                                                                                                                                | Plasma Membrane |
| <b>Q14574</b> | Desmocollin-3 precursor (Desmocollin-4) (HT-CP).                                                                                                                                                               | Plasma Membrane |
| <b>Q14126</b> | Desmoglein-2 precursor (HDGC).                                                                                                                                                                                 | Plasma Membrane |
| <b>Q16570</b> | [Duffy antigen/chemokine receptor (Fy glycoprotein) (GpFy), (Glycoprotein D) (Plasmodium vivax receptor) (CD234 antigen).]                                                                                     | Plasma Membrane |
| <b>P17813</b> | Endoglin precursor (CD105 antigen).                                                                                                                                                                            | Plasma Membrane |
| <b>Q14246</b> | [EGF-like module-containing mucin-like hormone receptor-like 1, precursor (Cell surface glycoprotein EMR1) (EMR1 hormone receptor).]                                                                           | Plasma Membrane |
| <b>P29317</b> | [Ephrin type-A receptor 2 precursor (EC 2.7.10.1) (Tyrosine-protein, kinase receptor ECK) (Epithelial cell kinase).]                                                                                           | Plasma Membrane |
| <b>P54753</b> | [Ephrin type-B receptor 3 precursor (EC 2.7.10.1) (Tyrosine-protein, kinase receptor HEK-2) (Tyrosine-protein kinase TYRO6).]                                                                                  | Plasma Membrane |
| <b>Q15303</b> | [Receptor tyrosine-protein kinase erbB-4 precursor (EC 2.7.10.1), (p180erbB4) (Tyrosine kinase-type cell surface receptor HER4).]                                                                              | Plasma Membrane |
| <b>Q9Y256</b> | [CAAX prenyl protease 2 (EC 3.4.22.-) (Prenyl protein-specific, endoprotease 2) (Farnesylated proteins-converting enzyme 2) (FACE-2), (hRCE1).]                                                                | Plasma Membrane |
| <b>Q14517</b> | [Cadherin-related tumor suppressor homolog precursor (Protein fat, homolog).]                                                                                                                                  | Plasma Membrane |
| <b>Q01362</b> | [High affinity immunoglobulin epsilon receptor subunit beta (FcERI), (IgE Fc receptor subunit beta) (Fc epsilon receptor I beta-chain), (Membrane-spanning 4-domains subfamily A member 2).]                   | Plasma Membrane |
| <b>P14867</b> | [Gamma-aminobutyric-acid receptor subunit alpha-1 precursor (GABA(A), receptor subunit alpha-1).]                                                                                                              | Plasma Membrane |
| <b>P18507</b> | [Gamma-aminobutyric-acid receptor subunit gamma-2 precursor (GABA(A), receptor subunit gamma-2).]                                                                                                              | Plasma Membrane |
| <b>P24046</b> | [Gamma-aminobutyric-acid receptor subunit rho-1 precursor (GABA(A), receptor subunit rho-1).]                                                                                                                  | Plasma Membrane |

|               |                                                                                                                                                                                                                                           |                 |
|---------------|-------------------------------------------------------------------------------------------------------------------------------------------------------------------------------------------------------------------------------------------|-----------------|
| <b>O75899</b> | [Gamma-aminobutyric acid type B receptor subunit 2 precursor (GABA-B, receptor 2) (GABA-B-R2) (Gb2) (GABABR2) (G-protein coupled receptor, 51) (HG20).]                                                                                   | Plasma Membrane |
| <b>Q13003</b> | [Glutamate receptor, ionotropic kainate 3 precursor (Glutamate receptor, 7) (GluR-7) (GluR7) (Excitatory amino acid receptor 5) (EAA5).]                                                                                                  | Plasma Membrane |
| <b>P42261</b> | [Glutamate receptor 1 precursor (GluR-1) (GluR-A) (GluR-K1) (Glutamate, receptor ionotropic, AMPA 1) (AMPA-selective glutamate receptor 1).]                                                                                              | Plasma Membrane |
| <b>Q13972</b> | [Guanine nucleotide-releasing protein (GNRP) (Ras-specific nucleotide, exchange factor CDC25) (Ras-specific guanine nucleotide-releasing, factor).]                                                                                       | Plasma Membrane |
| <b>O14842</b> | Free fatty acid receptor 1 (G-protein coupled receptor 40).                                                                                                                                                                               | Plasma Membrane |
| <b>P78333</b> | Glypican-5 precursor.                                                                                                                                                                                                                     | Plasma Membrane |
| <b>P46089</b> | Probable G-protein coupled receptor 3 (ACCA orphan receptor).                                                                                                                                                                             | Plasma Membrane |
| <b>P40197</b> | Platelet glycoprotein V precursor (GPV) (CD42D antigen).                                                                                                                                                                                  | Plasma Membrane |
| <b>P11168</b> | [Solute carrier family 2, facilitated glucose transporter member 2, (Glucose transporter type 2, liver) (GLUT-2).]                                                                                                                        | Plasma Membrane |
| <b>P14778</b> | [Interleukin-1 receptor type I precursor (IL-1R-1) (IL-1RT1) (IL-1R-, alpha) (p80) (CD121a antigen).]                                                                                                                                     | Plasma Membrane |
| <b>P40189</b> | [Interleukin-6 receptor subunit beta precursor (IL-6R-beta), (Interleukin-6 signal transducer) (Membrane glycoprotein 130) (gp130), (Oncostatin-M receptor alpha subunit) (CD130 antigen) (CDw130).]                                      | Plasma Membrane |
| <b>P26006</b> | [Integrin alpha-3 precursor (Galactoprotein B3) (GAPB3) (VLA-3 alpha, chain) (FRP-2) (CD49c antigen) [Contains: Integrin alpha-3 heavy, chain; Integrin alpha-3 light chain].]                                                            | Plasma Membrane |
| <b>P08514</b> | [Integrin alpha-IIb precursor (Platelet membrane glycoprotein IIb), (GPalpha IIb) (GPIIb) (CD41 antigen) [Contains: Integrin alpha-IIb, heavy chain; Integrin alpha-IIb light chain, form 1; Integrin alpha-, IIb light chain, form 2].]  | Plasma Membrane |
| <b>Q9UKX5</b> | Integrin alpha-11 precursor.                                                                                                                                                                                                              | Plasma Membrane |
| <b>P20702</b> | [Integrin alpha-X precursor (Leukocyte adhesion glycoprotein p150,95, alpha chain) (Leukocyte adhesion receptor p150,95) (Leu M5) (CD11c, antigen).]                                                                                      | Plasma Membrane |
| <b>P16144</b> | Integrin beta-4 precursor (GP150) (CD104 antigen).                                                                                                                                                                                        | Plasma Membrane |
| <b>P43632</b> | [Killer cell immunoglobulin-like receptor 2DS4 precursor (MHC class I, NK cell receptor) (Natural killer-associated transcript 8) (NKAT-8), (P58 natural killer cell receptor clone CL-39) (p58 NK receptor) (CL-, 17) (CD158i antigen).] | Plasma Membrane |
| <b>P07333</b> | [Macrophage colony-stimulating factor 1 receptor precursor, (EC 2.7.10.1) (CSF-1-R) (Fms proto-oncogene) (c-fms) (CD115 antigen).]                                                                                                        | Plasma Membrane |
| <b>P29376</b> | [Leukocyte tyrosine kinase receptor precursor (EC 2.7.10.1) (Protein, tyrosine kinase 1).]                                                                                                                                                | Plasma Membrane |
| <b>P11279</b> | [Lysosome-associated membrane glycoprotein 1 precursor (LAMP-1) (CD107a, antigen).]                                                                                                                                                       | Plasma Membrane |
| <b>P16581</b> | [E-selectin precursor (Endothelial leukocyte adhesion molecule 1), (ELAM-1) (Leukocyte-endothelial cell adhesion molecule 2) (LECAM2), (CD62E antigen).]                                                                                  | Plasma Membrane |
| <b>P22897</b> | Macrophage mannose receptor 1 precursor (MMR) (CD206 antigen).                                                                                                                                                                            | Plasma Membrane |
| <b>Q13255</b> | Metabotropic glutamate receptor 1 precursor (mGluR1).                                                                                                                                                                                     | Plasma Membrane |
| <b>O00222</b> | Metabotropic glutamate receptor 8 precursor (mGluR8).                                                                                                                                                                                     | Plasma Membrane |
| <b>O15438</b> | [Canalicular multispecific organic anion transporter 2 (ATP-binding, cassette sub-family C member 3) (Multidrug resistance-associated, protein 3) (Multi-specific organic anion transporter-D) (MOAT-D).]                                 | Plasma Membrane |
| <b>Q01726</b> | [Melanocyte-stimulating hormone receptor (MSH-R) (Melanotropin, receptor) (Melanocortin receptor 1) (MC1-R).]                                                                                                                             | Plasma Membrane |
| <b>Q9UBC5</b> | [Myosin-Ia (Brush border myosin I) (BBM-I) (BBMI) (Myosin I heavy, chain) (MIHC).]                                                                                                                                                        | Plasma Membrane |

|               |                                                                                                                                                                                                                                                                                                                         |                 |
|---------------|-------------------------------------------------------------------------------------------------------------------------------------------------------------------------------------------------------------------------------------------------------------------------------------------------------------------------|-----------------|
| <b>Q9Y5X5</b> | [Neuropeptide FF receptor 2 (Neuropeptide G-protein coupled receptor), (G-protein coupled receptor 74) (G-protein coupled receptor HLWAR77).]                                                                                                                                                                           | Plasma Membrane |
| <b>P26715</b> | [NKG2-A/NKG2-B type II integral membrane protein (NKG2-A/B-activating, NK receptor) (NK cell receptor A) (CD159a antigen).]                                                                                                                                                                                             | Plasma Membrane |
| <b>Q13224</b> | [Glutamate [NMDA] receptor subunit epsilon-2 precursor (N-methyl D-, aspartate receptor subtype 2B) (NR2B) (NMDAR2B) (N-methyl-D-aspartate, receptor subunit 3) (NR3) (hNR3).]                                                                                                                                          | Plasma Membrane |
| <b>Q14916</b> | [Sodium-dependent phosphate transport protein 1 (Sodium/phosphate, cotransporter 1) (Na(+)/Pi cotransporter 1) (Solute carrier family 17, member 1) (Renal sodium-dependent phosphate transport protein 1), (Renal sodium-phosphate transport protein 1) (Renal Na(+)-dependent, phosphate cotransporter 1) (Na/Pi-4).] | Plasma Membrane |
| <b>P49279</b> | Natural resistance-associated macrophage protein 1 (NRAMP 1).                                                                                                                                                                                                                                                           | Plasma Membrane |
| <b>Q9Y4C0</b> | Neurexin-3-alpha precursor (Neurexin III-alpha).                                                                                                                                                                                                                                                                        | Plasma Membrane |
| <b>O43613</b> | Orexin receptor type 1 (Ox1r) (Hypocretin receptor type 1).                                                                                                                                                                                                                                                             | Plasma Membrane |
| <b>P43115</b> | [Prostaglandin E2 receptor EP3 subtype (Prostanoid EP3 receptor) (PGE, receptor, EP3 subtype) (PGE2-R).]                                                                                                                                                                                                                | Plasma Membrane |
| <b>P78562</b> | [Phosphate-regulating neutral endopeptidase (EC 3.4.24.-), (Metalloendopeptidase homolog PEX) (X-linked hypophosphatemia protein), (HYP) (Vitamin D-resistant hypophosphatemic rickets protein).]                                                                                                                       | Plasma Membrane |
| <b>P98161</b> | [Polycystin-1 precursor (Autosomal dominant polycystic kidney disease, protein 1).]                                                                                                                                                                                                                                     | Plasma Membrane |
| <b>P23467</b> | [Receptor-type tyrosine-protein phosphatase beta precursor, (EC 3.1.3.48) (Protein-tyrosine phosphatase beta) (R-PTP-beta).]                                                                                                                                                                                            | Plasma Membrane |
| <b>P23470</b> | [Receptor-type tyrosine-protein phosphatase gamma precursor, (EC 3.1.3.48) (Protein-tyrosine phosphatase gamma) (R-PTP-gamma).]                                                                                                                                                                                         | Plasma Membrane |
| <b>Q16849</b> | [Receptor-type tyrosine-protein phosphatase-like N precursor (R-PTP-N), (PTP IA-2) (Islet cell antigen 512) (ICA 512) (Islet cell autoantigen, 3).]                                                                                                                                                                     | Plasma Membrane |
| <b>P23471</b> | [Receptor-type tyrosine-protein phosphatase zeta precursor, (EC 3.1.3.48) (R-PTP-zeta).]                                                                                                                                                                                                                                | Plasma Membrane |
| <b>Q08116</b> | [Regulator of G-protein signaling 1 (RGS1) (Early response protein, 1R20) (B-cell activation protein BL34).]                                                                                                                                                                                                            | Plasma Membrane |
| <b>Q03395</b> | [Rod outer segment membrane protein 1 (ROSP1) (Tetraspanin-23) (Tspan-, 23).]                                                                                                                                                                                                                                           | Plasma Membrane |
| <b>P29353</b> | [SHC-transforming protein 1 (SH2 domain protein C1) (Src homology 2, domain-containing-transforming protein C1).]                                                                                                                                                                                                       | Plasma Membrane |
| <b>P32745</b> | Somatostatin receptor type 3 (SS3R) (SSR-28).                                                                                                                                                                                                                                                                           | Plasma Membrane |
| <b>P36897</b> | [TGF-beta receptor type-1 precursor (EC 2.7.11.30) (TGF-beta receptor, type I) (TGFR-1) (TGF-beta type I receptor) (Transforming growth, factor-beta receptor type I) (TbetaR-I) (Serine/threonine-protein, kinase receptor R4) (SKR4) (Activin receptor-like kinase 5) (ALK-5).]                                       | Plasma Membrane |
| <b>Q9UKU6</b> | [Thyrotropin-releasing hormone-degrading ectoenzyme (EC 3.4.19.6) (TRH-, degrading ectoenzyme) (TRH-DE) (TRH-specific aminopeptidase), (Thyroliberinase) (Pyroglutamyl-peptidase II) (PAP-II).]                                                                                                                         | Plasma Membrane |
| <b>P35590</b> | Tyrosine-protein kinase receptor Tie-1 precursor (EC 2.7.10.1).                                                                                                                                                                                                                                                         | Plasma Membrane |
| <b>PO4629</b> | [High affinity nerve growth factor receptor precursor (EC 2.7.10.1), (Neurotrophic tyrosine kinase receptor type 1) (TRK1-transforming, tyrosine kinase protein) (p140-TrkA) (Trk-A).]                                                                                                                                  | Plasma Membrane |
| <b>Q12816</b> | Trophinin (MAGE-D3 antigen).                                                                                                                                                                                                                                                                                            | Plasma Membrane |
| <b>Q9Y210</b> | Short transient receptor potential channel 6 (TrpC6).                                                                                                                                                                                                                                                                   | Plasma Membrane |
| <b>PO1737</b> | T-cell receptor alpha chain V region PY14 precursor.                                                                                                                                                                                                                                                                    | Plasma Membrane |
| <b>Q05940</b> | [Synaptic vesicular amine transporter (Monoamine transporter), (Vesicular amine transporter 2) (VAT2) (Solute carrier family 18, member 2).]                                                                                                                                                                            | Plasma Membrane |
| <b>O15078</b> | Centrosomal protein Cep290 (Nephrocystin-6) (Tumor antigen se2-2).                                                                                                                                                                                                                                                      | Plasma Membrane |
| <b>P28221</b> | [5-hydroxytryptamine 1D receptor (5-HT-1D) (Serotonin receptor 1D) (5-, HT-1D-alpha).]                                                                                                                                                                                                                                  | Plasma Membrane |

|               |                                                                                                                                                                                                                                                                                                                                                                                                                                                                                                                                                                                                                                                                                                                        |                 |
|---------------|------------------------------------------------------------------------------------------------------------------------------------------------------------------------------------------------------------------------------------------------------------------------------------------------------------------------------------------------------------------------------------------------------------------------------------------------------------------------------------------------------------------------------------------------------------------------------------------------------------------------------------------------------------------------------------------------------------------------|-----------------|
| <b>P25100</b> | [Alpha-1D adrenergic receptor (Alpha 1D-adrenoceptor) (Alpha 1D-, adrenoceptor) (Alpha-1A adrenergic receptor) (Alpha-adrenergic, receptor 1a).]                                                                                                                                                                                                                                                                                                                                                                                                                                                                                                                                                                       | Plasma Membrane |
| <b>P05067</b> | [Amyloid beta A4 protein precursor (APP) (ABPP) (Alzheimer disease, amyloid protein) (Cerebral vascular amyloid peptide) (CVAP) (Protease, nexin-II) (PN-II) (APPI) (PreA4) [Contains: Soluble APP-alpha (S-APP-, alpha); Soluble APP-beta (S-APP-beta); C99; Beta-amyloid protein 42, (Beta-APP42); Beta-amyloid protein 40 (Beta-APP40); C83; P3(42);, P3(40); Gamma-CTF(59) (Gamma-secretase C-terminal fragment 59), (Amyloid intracellular domain 59) (AID(59)) (AICD-59); Gamma-CTF(57), (Gamma-secretase C-terminal fragment 57) (Amyloid intracellular domain, 57) (AID(57)) (AICD-57); Gamma-CTF(50) (Gamma-secretase C-terminal, fragment 50) (Amyloid intracellular domain 50) (AID(50)) (AICD-50);, C31].] | Plasma Membrane |
| <b>P29275</b> | Adenosine A2b receptor.                                                                                                                                                                                                                                                                                                                                                                                                                                                                                                                                                                                                                                                                                                | Plasma Membrane |
| <b>O95477</b> | [ATP-binding cassette sub-family A member 1 (ATP-binding cassette, transporter 1) (ATP-binding cassette 1) (ABC-1) (Cholesterol efflux, regulatory protein).]                                                                                                                                                                                                                                                                                                                                                                                                                                                                                                                                                          | Plasma Membrane |
| <b>P78325</b> | [ADAM 8 precursor (EC 3.4.24.-) (A disintegrin and metalloproteinase, domain 8) (Cell surface antigen MS2) (CD156a antigen) (CD156).]                                                                                                                                                                                                                                                                                                                                                                                                                                                                                                                                                                                  | Plasma Membrane |
| <b>P35670</b> | [Copper-transporting ATPase 2 (EC 3.6.3.4) (Copper pump 2) (Wilson, disease-associated protein) [Contains: WND/140 kDa].]                                                                                                                                                                                                                                                                                                                                                                                                                                                                                                                                                                                              | Plasma Membrane |
| <b>P23634</b> | [Plasma membrane calcium-transporting ATPase 4 (EC 3.6.3.8) (PMCA4), (Plasma membrane calcium pump isoform 4) (Plasma membrane calcium, ATPase isoform 4) (Matrix-remodeling-associated protein 1).]                                                                                                                                                                                                                                                                                                                                                                                                                                                                                                                   | Plasma Membrane |
| <b>Q02246</b> | [Contactin-2 precursor (Axonin-1) (Axonal glycoprotein TAG-1), (Transient axonal glycoprotein 1) (TAX-1).]                                                                                                                                                                                                                                                                                                                                                                                                                                                                                                                                                                                                             | Plasma Membrane |
| <b>P55291</b> | Cadherin-15 precursor (Muscle-cadherin) (M-cadherin) (Cadherin-14).                                                                                                                                                                                                                                                                                                                                                                                                                                                                                                                                                                                                                                                    | Plasma Membrane |
| <b>P29017</b> | T-cell surface glycoprotein CD1c precursor (CD1c antigen).                                                                                                                                                                                                                                                                                                                                                                                                                                                                                                                                                                                                                                                             | Plasma Membrane |
| <b>P06127</b> | [T-cell surface glycoprotein CD5 precursor (Lymphocyte antigen T1/Leu-, 1).]                                                                                                                                                                                                                                                                                                                                                                                                                                                                                                                                                                                                                                           | Plasma Membrane |
| <b>P21926</b> | [CD9 antigen (p24) (Leukocyte antigen MIC3) (Motility-related protein), (MRP-1) (Tetraspanin-29) (Tspan-29).]                                                                                                                                                                                                                                                                                                                                                                                                                                                                                                                                                                                                          | Plasma Membrane |
| <b>Q9Y5H8</b> | Protocadherin alpha 3 precursor (PCDH-alpha3).                                                                                                                                                                                                                                                                                                                                                                                                                                                                                                                                                                                                                                                                         | Plasma Membrane |
| <b>Q9Y5H6</b> | Protocadherin alpha 8 precursor (PCDH-alpha8).                                                                                                                                                                                                                                                                                                                                                                                                                                                                                                                                                                                                                                                                         | Plasma Membrane |
| <b>Q9Y5E8</b> | Protocadherin beta 15 precursor (PCDH-beta15).                                                                                                                                                                                                                                                                                                                                                                                                                                                                                                                                                                                                                                                                         | Plasma Membrane |
| <b>P32246</b> | [C-C chemokine receptor type 1 (C-C CKR-1) (CC-CKR-1) (CCR-1) (CCR1), (Macrophage inflammatory protein 1-alpha receptor) (MIP-1alpha-R), (RANTES-R) (HM145) (LD78 receptor) (CD191 antigen).]                                                                                                                                                                                                                                                                                                                                                                                                                                                                                                                          | Plasma Membrane |
| <b>P51795</b> | Chloride channel protein 5 (ClC-5).                                                                                                                                                                                                                                                                                                                                                                                                                                                                                                                                                                                                                                                                                    | Plasma Membrane |
| <b>P02748</b> | [Complement component C9 precursor [Contains: Complement component C9a;, Complement component C9b].]                                                                                                                                                                                                                                                                                                                                                                                                                                                                                                                                                                                                                   | Plasma Membrane |
| <b>Q9Y5Q5</b> | [Atrial natriuretic peptide-converting enzyme (EC 3.4.21.-) (pro-ANP-, converting enzyme) (Corin) (Heart-specific serine proteinase ATC2), (Transmembrane protease, serine 10).]                                                                                                                                                                                                                                                                                                                                                                                                                                                                                                                                       | Plasma Membrane |
| <b>P17927</b> | [Complement receptor type 1 precursor (C3b/C4b receptor) (CD35, antigen).]                                                                                                                                                                                                                                                                                                                                                                                                                                                                                                                                                                                                                                             | Plasma Membrane |
| <b>P30825</b> | [High affinity cationic amino acid transporter 1 (CAT-1) (CAT1) (System, Y+ basic amino acid transporter) (Ecotropic retroviral leukemia, receptor homolog) (ERR) (Ecotropic retrovirus receptor homolog).]                                                                                                                                                                                                                                                                                                                                                                                                                                                                                                            | Plasma Membrane |
| <b>P35212</b> | Gap junction alpha-4 protein (Connexin-37) (Cx37).                                                                                                                                                                                                                                                                                                                                                                                                                                                                                                                                                                                                                                                                     | Plasma Membrane |
| <b>Q02846</b> | [Retinal guanylyl cyclase 1 precursor (EC 4.6.1.2) (Guanylate cyclase, 2D, retinal) (RETGC-1) (Rod outer segment membrane guanylate cyclase), (ROS-GC).]                                                                                                                                                                                                                                                                                                                                                                                                                                                                                                                                                               | Plasma Membrane |
| <b>P31785</b> | [Cytokine receptor common gamma chain precursor (Gamma-C) (Interleukin-, 2 receptor gamma chain) (IL-2R gamma chain) (p64) (CD132 antigen).]                                                                                                                                                                                                                                                                                                                                                                                                                                                                                                                                                                           | Plasma Membrane |
| <b>O60469</b> | Down syndrome cell adhesion molecule precursor (CHD2).                                                                                                                                                                                                                                                                                                                                                                                                                                                                                                                                                                                                                                                                 | Plasma Membrane |
| <b>P21453</b> | [Sphingosine 1-phosphate receptor Edg-1 (Sphingosine 1-phosphate, receptor 1) (S1P1).]                                                                                                                                                                                                                                                                                                                                                                                                                                                                                                                                                                                                                                 | Plasma Membrane |

|               |                                                                                                                                                                                                                                                                                                                                                                              |                 |
|---------------|------------------------------------------------------------------------------------------------------------------------------------------------------------------------------------------------------------------------------------------------------------------------------------------------------------------------------------------------------------------------------|-----------------|
| <b>P52799</b> | [Ephrin-B2 precursor (EPH-related receptor tyrosine kinase ligand 5), (LERK-5) (HTK ligand) (HTK-L).]                                                                                                                                                                                                                                                                        | Plasma Membrane |
| <b>P29320</b> | [Ephrin type-A receptor 3 precursor (EC 2.7.10.1) (Tyrosine-protein, kinase receptor ETK1) (HEK) (HEK4) (Tyrosine-protein kinase TYRO4).]                                                                                                                                                                                                                                    | Plasma Membrane |
| <b>P21802</b> | [Fibroblast growth factor receptor 2 precursor (EC 2.7.10.1) (FGFR-2), (Keratinocyte growth factor receptor 2) (CD332 antigen).]                                                                                                                                                                                                                                             | Plasma Membrane |
| <b>Q04609</b> | [Glutamate carboxypeptidase 2 (EC 3.4.17.21) (Glutamate, carboxypeptidase II) (Membrane glutamate carboxypeptidase) (mGCP) (N-, acetylated-alpha-linked acidic dipeptidase I) (NAALADase I), (Pteroylpoly-gamma-glutamate carboxypeptidase) (Folylpoly-gamma-, glutamate carboxypeptidase) (FGCP) (Folate hydrolase 1) (Prostate-, specific membrane antigen) (PSMA) (PSM).] | Plasma Membrane |
| <b>P48169</b> | [Gamma-aminobutyric-acid receptor subunit alpha-4 precursor (GABA(A), receptor subunit alpha-4).]                                                                                                                                                                                                                                                                            | Plasma Membrane |
| <b>Q9UN88</b> | [Gamma-aminobutyric-acid receptor subunit theta precursor (GABA(A), receptor subunit theta).]                                                                                                                                                                                                                                                                                | Plasma Membrane |
| <b>P50395</b> | [Rab GDP dissociation inhibitor beta (Rab GDI beta) (Guanosine, diphosphate dissociation inhibitor 2) (GDI-2).]                                                                                                                                                                                                                                                              | Plasma Membrane |
| <b>Q16099</b> | [Glutamate receptor, ionotropic kainate 4 precursor (Glutamate receptor, KA-1) (KA1) (Excitatory amino acid receptor 1) (EAA1).]                                                                                                                                                                                                                                             | Plasma Membrane |
| <b>P42262</b> | [Glutamate receptor 2 precursor (GluR-2) (GluR-B) (GluR-K2) (Glutamate, receptor ionotropic, AMPA 2) (AMPA-selective glutamate receptor 2).]                                                                                                                                                                                                                                 | Plasma Membrane |
| <b>O43194</b> | Probable G-protein coupled receptor 39.                                                                                                                                                                                                                                                                                                                                      | Plasma Membrane |
| <b>O15529</b> | Putative G-protein coupled receptor 42.                                                                                                                                                                                                                                                                                                                                      | Plasma Membrane |
| <b>P07359</b> | [Platelet glycoprotein Ib alpha chain precursor (Glycoprotein Ibalpha), (GP-Ib alpha) (GPIbA) (GPIb-alpha) (Antigen CD42b-alpha) (CD42b, antigen) [Contains: Glycocalicin].]                                                                                                                                                                                                 | Plasma Membrane |
| <b>P46093</b> | Probable G-protein coupled receptor 4 (G-protein coupled receptor 19).                                                                                                                                                                                                                                                                                                       | Plasma Membrane |
| <b>P05536</b> | HLA class II histocompatibility antigen, DQ(W3) alpha chain precursor.                                                                                                                                                                                                                                                                                                       | Plasma Membrane |
| <b>Q92839</b> | [Hyaluronan synthase 1 (EC 2.4.1.212) (Hyaluronate synthase 1), (Hyaluronic acid synthase 1) (HA synthase 1) (HuHAS1).]                                                                                                                                                                                                                                                      | Plasma Membrane |
| <b>P05981</b> | [Serine protease hepsin (EC 3.4.21.106) (Transmembrane protease, serine, 1) [Contains: Serine protease hepsin non-catalytic chain; Serine, protease hepsin catalytic chain].]                                                                                                                                                                                                | Plasma Membrane |
| <b>P11142</b> | Heat shock cognate 71 kDa protein (Heat shock 70 kDa protein 8).                                                                                                                                                                                                                                                                                                             | Plasma Membrane |
| <b>P42701</b> | [Interleukin-12 receptor beta-1 chain precursor (IL-12R-beta1), (Interleukin-12 receptor beta) (IL-12 receptor beta component) (IL-, 12RB1) (CD212 antigen).]                                                                                                                                                                                                                | Plasma Membrane |
| <b>Q9UII2</b> | ATPase inhibitor, mitochondrial precursor.                                                                                                                                                                                                                                                                                                                                   | Plasma Membrane |
| <b>P05362</b> | [Intercellular adhesion molecule 1 precursor (ICAM-1) (Major group, rhinovirus receptor) (CD54 antigen).]                                                                                                                                                                                                                                                                    | Plasma Membrane |
| <b>P01589</b> | [Interleukin-2 receptor alpha chain precursor (IL-2 receptor alpha, subunit) (IL-2-RA) (IL2-RA) (p55) (TAC antigen) (CD25 antigen).]                                                                                                                                                                                                                                         | Plasma Membrane |
| <b>P53708</b> | [Integrin alpha-8 precursor [Contains: Integrin alpha-8 heavy chain;, Integrin alpha-8 light chain].]                                                                                                                                                                                                                                                                        | Plasma Membrane |
| <b>Q13349</b> | [Integrin alpha-D precursor (Leukointegrin alpha D) (ADB2) (CD11d, antigen).]                                                                                                                                                                                                                                                                                                | Plasma Membrane |
| <b>P20701</b> | [Integrin alpha-L precursor (Leukocyte adhesion glycoprotein LFA-1, alpha chain) (LFA-1A) (Leukocyte function-associated molecule 1 alpha, chain) (CD11a antigen).]                                                                                                                                                                                                          | Plasma Membrane |
| <b>P05556</b> | [Integrin beta-1 precursor (Fibronectin receptor subunit beta), (Integrin VLA-4 subunit beta) (CD29 antigen).]                                                                                                                                                                                                                                                               | Plasma Membrane |
| <b>P18564</b> | Integrin beta-6 precursor.                                                                                                                                                                                                                                                                                                                                                   | Plasma Membrane |
| <b>P43630</b> | [Killer cell immunoglobulin-like receptor 3DL2 precursor (MHC class I, NK cell receptor) (Natural killer-associated transcript 4) (NKAT-4), (p70 natural killer cell receptor clone CL-5) (CD158k antigen).]                                                                                                                                                                 | Plasma Membrane |
| <b>Q01650</b> | [Large neutral amino acids transporter small subunit 1 (L-type amino, acid transporter 1) (4F2 light chain) (4F2 LC) (4F2LC) (CD98 light, chain) (Integral membrane protein E16) (hLAT1).]                                                                                                                                                                                   | Plasma Membrane |
| <b>P01130</b> | Low-density lipoprotein receptor precursor (LDL receptor).                                                                                                                                                                                                                                                                                                                   | Plasma Membrane |

|               |                                                                                                                                                                                                                                                                                                                                                                                                                                  |                 |
|---------------|----------------------------------------------------------------------------------------------------------------------------------------------------------------------------------------------------------------------------------------------------------------------------------------------------------------------------------------------------------------------------------------------------------------------------------|-----------------|
| <b>P16109</b> | [P-selectin precursor (Granule membrane protein 140) (GMP-140) (PADGEM), (Leukocyte-endothelial cell adhesion molecule 3) (LECAM3) (CD62P, antigen).]                                                                                                                                                                                                                                                                            | Plasma Membrane |
| <b>P42702</b> | [Leukemia inhibitory factor receptor precursor (LIF receptor) (LIF-R), (CD118 antigen).]                                                                                                                                                                                                                                                                                                                                         | Plasma Membrane |
| <b>Q07954</b> | [Prolow-density lipoprotein receptor-related protein 1 precursor (LRP), (Alpha-2-macroglobulin receptor) (A2MR) (Apolipoprotein E receptor), (APOER) (CD91 antigen) [Contains: Low-density lipoprotein receptor-, related protein 1 85 kDa subunit (LRP-85); Low-density lipoprotein, receptor-related protein 1 515 kDa subunit (LRP-515); Low-density, lipoprotein receptor-related protein 1 intracellular domain (LRPICD)].] | Plasma Membrane |
| <b>P15529</b> | [Membrane cofactor protein precursor (Trophoblast leukocyte common, antigen) (TLX) (CD46 antigen).]                                                                                                                                                                                                                                                                                                                              | Plasma Membrane |
| <b>P08183</b> | [Multidrug resistance protein 1 (EC 3.6.3.44) (ATP-binding cassette, sub-family B member 1) (P-glycoprotein 1) (CD243 antigen).]                                                                                                                                                                                                                                                                                                 | Plasma Membrane |
| <b>P51512</b> | [Matrix metalloproteinase-16 precursor (EC 3.4.24.-) (MMP-16), (Membrane-type matrix metalloproteinase 3) (MT-MMP 3) (MTMMP3), (Membrane-type-3 matrix metalloproteinase) (MT3-MMP) (MT3MMP) (MMP-, X2).]                                                                                                                                                                                                                        | Plasma Membrane |
| <b>O60669</b> | [Monocarboxylate transporter 2 (MCT 2) (Solute carrier family 16 member, 7).]                                                                                                                                                                                                                                                                                                                                                    | Plasma Membrane |
| <b>O95255</b> | [Multidrug resistance-associated protein 6 (ATP-binding cassette sub-, family C member 6) (Anthracycline resistance-associated protein), (Multi-specific organic anion transporter-E) (MOAT-E).]                                                                                                                                                                                                                                 | Plasma Membrane |
| <b>P15941</b> | [Mucin-1 precursor (MUC-1) (Polymorphic epithelial mucin) (PEM) (PEMT), (Episialin) (Tumor-associated mucin) (Carcinoma-associated mucin), (Tumor-associated epithelial membrane antigen) (EMA) (H23AG) (Peanut-, reactive urinary mucin) (PUM) (Breast carcinoma-associated antigen, DF3) (CD227 antigen).]                                                                                                                     | Plasma Membrane |
| <b>Q13508</b> | [Ecto-ADP-ribosyltransferase 3 precursor (EC 2.4.2.31) (NAD(P)(+)-, arginine ADP-ribosyltransferase 3) (Mono(ADP-ribosyl)transferase 3).]                                                                                                                                                                                                                                                                                        | Plasma Membrane |
| <b>Q92859</b> | Neogenin precursor.                                                                                                                                                                                                                                                                                                                                                                                                              | Plasma Membrane |
| <b>P49281</b> | [Natural resistance-associated macrophage protein 2 (NRAMP 2) (Divalent, metal transporter 1) (DMT1).]                                                                                                                                                                                                                                                                                                                           | Plasma Membrane |
| <b>O95665</b> | [Neurotensin receptor type 2 (NT-R-2) (Levocabastine-sensitive, neurotensin receptor) (NTR2 receptor).]                                                                                                                                                                                                                                                                                                                          | Plasma Membrane |
| <b>P49757</b> | Protein numb homolog (h-Numb) (Protein S171).                                                                                                                                                                                                                                                                                                                                                                                    | Plasma Membrane |
| <b>Q9ULB1</b> | Neurexin-1-alpha precursor (Neurexin I-alpha).                                                                                                                                                                                                                                                                                                                                                                                   | Plasma Membrane |
| <b>P50391</b> | [Neuropeptide Y receptor type 4 (NPY4-R) (Pancreatic polypeptide, receptor 1) (PP1).]                                                                                                                                                                                                                                                                                                                                            | Plasma Membrane |
| <b>Q16625</b> | Occludin.                                                                                                                                                                                                                                                                                                                                                                                                                        | Plasma Membrane |
| <b>Q14982</b> | [Opioid-binding protein/cell adhesion molecule precursor (OBCAM), (Opioid-binding cell adhesion molecule) (OPCML).]                                                                                                                                                                                                                                                                                                              | Plasma Membrane |
| <b>Q14444</b> | [Caprin-1 (Cytoplasmic activation- and proliferation-associated protein, 1) (GPI-anchored membrane protein 1) (GPI-anchored protein p137), (p137GPI) (Membrane component chromosome 11 surface marker 1).]                                                                                                                                                                                                                       | Plasma Membrane |
| <b>O15547</b> | [P2X purinoceptor 6 (ATP receptor) (P2X6) (Purinerbic receptor) (P2XM), (Purinerbic receptor P2X-like 1).]                                                                                                                                                                                                                                                                                                                       | Plasma Membrane |
| <b>Q15077</b> | P2Y purinoceptor 6 (P2Y6).                                                                                                                                                                                                                                                                                                                                                                                                       | Plasma Membrane |
| <b>P41586</b> | [Pituitary adenylate cyclase-activating polypeptide type I receptor, precursor (PACAP type I receptor) (PACAP-R-1).]                                                                                                                                                                                                                                                                                                             | Plasma Membrane |
| <b>O00254</b> | [Proteinase-activated receptor 3 precursor (PAR-3) (Thrombin receptor-, like 2) (Coagulation factor II receptor-like 2).]                                                                                                                                                                                                                                                                                                        | Plasma Membrane |
| <b>P07237</b> | [Protein disulfide-isomerase precursor (EC 5.3.4.1) (PDI) (Prolyl 4-, hydroxylase subunit beta) (Cellular thyroid hormone-binding protein), (p55).]                                                                                                                                                                                                                                                                              | Plasma Membrane |
| <b>O43490</b> | [Prominin-1 precursor (Prominin-like protein 1) (Antigen AC133) (CD133, antigen).]                                                                                                                                                                                                                                                                                                                                               | Plasma Membrane |
| <b>P23468</b> | [Receptor-type tyrosine-protein phosphatase delta precursor, (EC 3.1.3.48) (Protein-tyrosine phosphatase delta) (R-PTP-delta).]                                                                                                                                                                                                                                                                                                  | Plasma Membrane |
| <b>Q15262</b> | [Receptor-type tyrosine-protein phosphatase kappa precursor, (EC 3.1.3.48) (Protein-tyrosine phosphatase kappa) (R-PTP-kappa).]                                                                                                                                                                                                                                                                                                  | Plasma Membrane |

|               |                                                                                                                                                                                                                                                                 |                 |
|---------------|-----------------------------------------------------------------------------------------------------------------------------------------------------------------------------------------------------------------------------------------------------------------|-----------------|
| <b>Q92729</b> | [Receptor-type tyrosine-protein phosphatase U precursor (EC 3.1.3.48), (R-PTP-U) (Protein-tyrosine phosphatase J) (PTP-J) (Pancreatic, carcinoma phosphatase 2) (PCP-2).]                                                                                       | Plasma Membrane |
| <b>Q13671</b> | [Ras and Rab interactor 1 (Ras interaction/interference protein 1) (Ras, inhibitor JC99).]                                                                                                                                                                      | Plasma Membrane |
| <b>Q04912</b> | [Macrophage-stimulating protein receptor precursor (EC 2.7.10.1) (MSP, receptor) (p185-Ron) (CD136 antigen) (CDw136) [Contains: Macrophage-, stimulating protein receptor alpha chain; Macrophage-stimulating, protein receptor beta chain].]                   | Plasma Membrane |
| <b>P43007</b> | [Neutral amino acid transporter A (SATT) (Solute carrier family 1, member 4) (Alanine/serine/cysteine/ threonine transporter) (ASCT1).]                                                                                                                         | Plasma Membrane |
| <b>O43556</b> | Epsilon-sarcoglycan precursor (Epsilon-SG).                                                                                                                                                                                                                     | Plasma Membrane |
| <b>Q9Y289</b> | [Sodium-dependent multivitamin transporter (Na(+)-dependent, multivitamin transporter).]                                                                                                                                                                        | Plasma Membrane |
| <b>Q92673</b> | [Sortilin-related receptor precursor (Sorting protein-related receptor, containing LDLR class A repeats) (SorLA) (SorLA-1) (Low-density, lipoprotein receptor relative with 11 ligand-binding repeats) (LDLR, relative with 11 ligand-binding repeats) (LR11).] | Plasma Membrane |
| <b>P48230</b> | [Transmembrane 4 L6 family member 4 (Intestine and liver tetraspan, membrane protein) (IL-TMP).]                                                                                                                                                                | Plasma Membrane |
| <b>P21731</b> | Thromboxane A2 receptor (TXA2-R) (Prostanoid TP receptor).                                                                                                                                                                                                      | Plasma Membrane |
| <b>Q02763</b> | [Angiopoietin-1 receptor precursor (EC 2.7.10.1) (Tyrosine-protein, kinase receptor TIE-2) (hTIE2) (Tyrosine-protein kinase receptor TEK), (p140 TEK) (Tunica interna endothelial cell kinase) (CD202b antigen).]                                               | Plasma Membrane |
| <b>O15393</b> | [Transmembrane protease, serine 2 precursor (EC 3.4.21.-) (Serine, protease 10) [Contains: Transmembrane protease, serine 2 non-catalytic, chain; Transmembrane protease, serine 2 catalytic chain].]                                                           | Plasma Membrane |
| <b>Q16620</b> | [BDNF/NT-3 growth factors receptor precursor (EC 2.7.10.1), (Neurotrophic tyrosine kinase receptor type 2) (TrkB tyrosine kinase), (GP145-TrkB) (Trk-B).]                                                                                                       | Plasma Membrane |
| <b>Q03405</b> | [Urokinase plasminogen activator surface receptor precursor (uPAR) (U-, PAR) (Monocyte activation antigen Mo3) (CD87 antigen).]                                                                                                                                 | Plasma Membrane |
| <b>P38606</b> | [Vacuolar ATP synthase catalytic subunit A (EC 3.6.3.14) (V-ATPase, subunit A) (Vacuolar proton pump subunit alpha) (V-ATPase 69 kDa, subunit) (Vacuolar ATPase isoform VA68).]                                                                                 | Plasma Membrane |
| <b>P35968</b> | [Vascular endothelial growth factor receptor 2 precursor (EC 2.7.10.1), (VEGFR-2) (Kinase insert domain receptor) (Protein-tyrosine kinase, receptor Flk-1) (CD309 antigen).]                                                                                   | Plasma Membrane |
| <b>P32241</b> | [Vasoactive intestinal polypeptide receptor 1 precursor (VIP-R-1), (Pituitary adenylate cyclase-activating polypeptide type II receptor), (PACAP type II receptor) (PACAP-R-2).]                                                                                | Plasma Membrane |
| <b>P30939</b> | 5-hydroxytryptamine 1F receptor (5-HT-1F) (Serotonin receptor 1F).                                                                                                                                                                                              | Plasma Membrane |
| <b>P46098</b> | [5-hydroxytryptamine 3 receptor precursor (5-HT-3) (Serotonin-gated ion, channel receptor) (5-HT3R).]                                                                                                                                                           | Plasma Membrane |
| <b>O95342</b> | Bile salt export pump (ATP-binding cassette sub-family B member 11).                                                                                                                                                                                            | Plasma Membrane |
| <b>P24588</b> | [A-kinase anchor protein 5 (A-kinase anchor protein 79 kDa) (AKAP 79), (cAMP-dependent protein kinase regulatory subunit II high affinity-, binding protein) (H21).]                                                                                            | Plasma Membrane |
| <b>P16157</b> | Ankyrin-1 (Erythrocyte ankyrin) (Ankyrin-R).                                                                                                                                                                                                                    | Plasma Membrane |
| <b>P16066</b> | [Atrial natriuretic peptide receptor A precursor (ANP-A) (ANPRA) (GC-A), (Guanylate cyclase) (EC 4.6.1.2) (NPR-A) (Atrial natriuretic peptide, A-type receptor).]                                                                                               | Plasma Membrane |
| <b>O95445</b> | Apolipoprotein M (Apo-M) (ApoM) (Protein G3a).                                                                                                                                                                                                                  | Plasma Membrane |
| <b>Q13796</b> | Protein Shroom2 (Apical-like protein) (Protein APXL).                                                                                                                                                                                                           | Plasma Membrane |
| <b>P48751</b> | [Anion exchange protein 3 (Neuronal band 3-like protein) (Solute, carrier family 4 member 3) (Cardiac/brain band 3-like protein), (CAE3/BAE3).]                                                                                                                 | Plasma Membrane |

|               |                                                                                                                                                                                                                                                                                                                                                                                                                                |                 |
|---------------|--------------------------------------------------------------------------------------------------------------------------------------------------------------------------------------------------------------------------------------------------------------------------------------------------------------------------------------------------------------------------------------------------------------------------------|-----------------|
| <b>Q9Y2A9</b> | [UDP-GlcNAc:betaGal beta-1,3-N-acetylglucosaminyltransferase 3, (EC 2.4.1.-) (Beta3Gn-T3) (BGnT-3) (Core 1 extending beta-1,3-N-, acetylglucosaminyltransferase) (Core1-beta3GlcNAcT) (Beta-1,3-, galactosyltransferase 8) (Beta-1,3-GalTase 8) (Beta3Gal-T8) (b3Gal-T8), (UDP galactose:beta-N-acetylglucosamine beta-1,3-galactosyltransferase, 8) (UDP-Gal:beta-GlcNAc beta-1,3-galactosyltransferase 8) (Beta-3-Gx-, T8).] | Plasma Membrane |
| <b>O00238</b> | [Bone morphogenetic protein receptor type IB precursor (EC 2.7.11.30), (CDw293 antigen).]                                                                                                                                                                                                                                                                                                                                      | Plasma Membrane |
| <b>P04839</b> | [Cytochrome b-245 heavy chain (p22 phagocyte B-cytochrome) (Neutrophil, cytochrome b 91 kDa polypeptide) (CGD91-phox) (gp91-phox) (gp91-1), (Heme-binding membrane glycoprotein gp91phox) (Cytochrome b(558), subunit beta) (Cytochrome b558 subunit beta) (Superoxide-generating, NADPH oxidase heavy chain subunit) (NADPH oxidase 2).]                                                                                      | Plasma Membrane |
| <b>P41180</b> | [Extracellular calcium-sensing receptor precursor (CaSR) (Parathyroid, Cell calcium-sensing receptor).]                                                                                                                                                                                                                                                                                                                        | Plasma Membrane |
| <b>P34972</b> | Cannabinoid receptor 2 (CB2) (CB-2) (CX5).                                                                                                                                                                                                                                                                                                                                                                                     | Plasma Membrane |
| <b>P32238</b> | [Cholecystokinin type A receptor (CCK-A receptor) (CCK-AR), (Cholecystokinin-1 receptor) (CCK1-R).]                                                                                                                                                                                                                                                                                                                            | Plasma Membrane |
| <b>P08571</b> | [Monocyte differentiation antigen CD14 precursor (Myeloid cell-specific, leucine-rich glycoprotein) [Contains: Monocyte differentiation antigen, CD14, urinary form; Monocyte differentiation antigen CD14, membrane-, bound form].]                                                                                                                                                                                           | Plasma Membrane |
| <b>P16070</b> | [CD44 antigen precursor (Phagocytic glycoprotein I) (PGP-1) (HUTCH-I), (Extracellular matrix receptor-III) (ECMR-III) (GP90 lymphocyte, homing/adhesion receptor) (Hermes antigen) (Hyaluronate receptor), (Heparan sulfate proteoglycan) (Epican) (CDw44).]                                                                                                                                                                   | Plasma Membrane |
| <b>P31358</b> | [CAMPATH-1 antigen precursor (Cambridge pathology 1 antigen), (Epididymal secretory protein E5) (CD52 antigen) (CDw52).]                                                                                                                                                                                                                                                                                                       | Plasma Membrane |
| <b>Q9Y513</b> | Protocadherin alpha 1 precursor (PCDH-alpha1).                                                                                                                                                                                                                                                                                                                                                                                 | Plasma Membrane |
| <b>Q9UN74</b> | Protocadherin alpha 4 precursor (PCDH-alpha4).                                                                                                                                                                                                                                                                                                                                                                                 | Plasma Membrane |
| <b>Q9Y511</b> | Protocadherin alpha 11 precursor (PCDH-alpha11).                                                                                                                                                                                                                                                                                                                                                                               | Plasma Membrane |
| <b>Q9Y5F1</b> | Protocadherin beta 12 precursor (PCDH-beta12).                                                                                                                                                                                                                                                                                                                                                                                 | Plasma Membrane |
| <b>P51684</b> | [C-C chemokine receptor type 6 (C-C CKR-6) (CC-CKR-6) (CCR-6) (LARC, receptor) (GPR-CY4) (GPCRY4) (Chemokine receptor-like 3) (CKR-L3), (DRY6) (G-protein coupled receptor 29) (CD196 antigen).]                                                                                                                                                                                                                               | Plasma Membrane |
| <b>P35523</b> | [Chloride channel protein, skeletal muscle (Chloride channel protein 1), (ClC-1).]                                                                                                                                                                                                                                                                                                                                             | Plasma Membrane |
| <b>O60503</b> | [Adenylate cyclase type 9 (EC 4.6.1.1) (Adenylate cyclase type IX) (ATP, pyrophosphate-lyase 9) (Adenylyl cyclase 9).]                                                                                                                                                                                                                                                                                                         | Plasma Membrane |
| <b>O94907</b> | [Dickkopf-related protein 1 precursor (Dkk-1) (Dickkopf-1) (hDkk-1), (SK).]                                                                                                                                                                                                                                                                                                                                                    | Plasma Membrane |
| <b>P21453</b> | [Sphingosine 1-phosphate receptor Edg-1 (Sphingosine 1-phosphate, receptor 1) (S1P1).]                                                                                                                                                                                                                                                                                                                                         | Plasma Membrane |
| <b>P54762</b> | [Ephrin type-B receptor 1 precursor (EC 2.7.10.1) (Tyrosine-protein, kinase receptor EPH-2) (NET) (HEK6) (ELK).]                                                                                                                                                                                                                                                                                                               | Plasma Membrane |
| <b>P21860</b> | [Receptor tyrosine-protein kinase erbB-3 precursor (EC 2.7.10.1) (c-, erbB3) (Tyrosine kinase-type cell surface receptor HER3).]                                                                                                                                                                                                                                                                                               | Plasma Membrane |
| <b>P25101</b> | [Endothelin-1 receptor precursor (Endothelin A receptor) (ET-A) (hET-, AR) (ETA-R).]                                                                                                                                                                                                                                                                                                                                           | Plasma Membrane |
| <b>P34910</b> | [EVI2B protein precursor (Ecotropic viral integration site 2B protein, homolog) (EVI-2B).]                                                                                                                                                                                                                                                                                                                                     | Plasma Membrane |
| <b>P24071</b> | [Immunoglobulin alpha Fc receptor precursor (IgA Fc receptor) (CD89, antigen).]                                                                                                                                                                                                                                                                                                                                                | Plasma Membrane |
| <b>P41440</b> | [Folate transporter 1 (Solute carrier family 19 member 1) (Placental, folate transporter) (FOLT) (Reduced folate carrier protein) (RFC), (Intestinal folate carrier) (IFC-1).]                                                                                                                                                                                                                                                 | Plasma Membrane |
| <b>P31644</b> | [Gamma-aminobutyric-acid receptor subunit alpha-5 precursor (GABA(A), receptor subunit alpha-5).]                                                                                                                                                                                                                                                                                                                              | Plasma Membrane |
| <b>Q99062</b> | [Granulocyte colony-stimulating factor receptor precursor (G-CSF-R), (CD114 antigen).]                                                                                                                                                                                                                                                                                                                                         | Plasma Membrane |
| <b>P10912</b> | [Growth hormone receptor precursor (GH receptor) (Somatotropin, receptor) [Contains: Growth hormone-binding protein (GH-binding, protein) (GHBP) (Serum-binding protein)].]                                                                                                                                                                                                                                                    | Plasma Membrane |



|               |                                                                                                                                                                                                                                                              |                 |
|---------------|--------------------------------------------------------------------------------------------------------------------------------------------------------------------------------------------------------------------------------------------------------------|-----------------|
| <b>Q13002</b> | [Glutamate receptor, ionotropic kainate 2 precursor (Glutamate receptor, 6) (GluR-6) (GluR6) (Excitatory amino acid receptor 4) (EAA4).]                                                                                                                     | Plasma Membrane |
| <b>P48058</b> | [Glutamate receptor 4 precursor (GluR-4) (GluR4) (GluR-D) (Glutamate, receptor ionotropic, AMPA 4) (AMPA-selective glutamate receptor 4).]                                                                                                                   | Plasma Membrane |
| <b>P51654</b> | Glypican-3 precursor (Intestinal protein OCI-5) (GTR2-2) (MXR7).                                                                                                                                                                                             | Plasma Membrane |
| <b>P46091</b> | Probable G-protein coupled receptor 1.                                                                                                                                                                                                                       | Plasma Membrane |
| <b>P48167</b> | [Glycine receptor subunit beta precursor (Glycine receptor 58 kDa, subunit).]                                                                                                                                                                                | Plasma Membrane |
| <b>P14672</b> | [Solute carrier family 2, facilitated glucose transporter member 4, (Glucose transporter type 4, insulin-responsive) (GLUT-4).]                                                                                                                              | Plasma Membrane |
| <b>O00219</b> | [Hyaluronan synthase 3 (EC 2.4.1.212) (Hyaluronate synthase 3), (Hyaluronic acid synthase 3) (HA synthase 3).]                                                                                                                                               | Plasma Membrane |
| <b>P49019</b> | [Nicotinic acid receptor 2 (G-protein coupled receptor 109B) (G-protein, coupled receptor HM74) (G-protein coupled receptor HM74B).]                                                                                                                         | Plasma Membrane |
| <b>P54652</b> | Heat shock-related 70 kDa protein 2 (Heat shock 70 kDa protein 2).                                                                                                                                                                                           | Plasma Membrane |
| <b>Q13651</b> | [Interleukin-10 receptor alpha chain precursor (IL-10R-A) (IL-10R1), (CDw210a antigen).]                                                                                                                                                                     | Plasma Membrane |
| <b>P08069</b> | [Insulin-like growth factor 1 receptor precursor (EC 2.7.10.1), (Insulin-like growth factor I receptor) (IGF-I receptor) (CD221, antigen) [Contains: Insulin-like growth factor 1 receptor alpha chain;, Insulin-like growth factor 1 receptor beta chain].] | Plasma Membrane |
| <b>P15260</b> | [Interferon-gamma receptor alpha chain precursor (IFN-gamma-R1) (CD119, antigen) (CDw119).]                                                                                                                                                                  | Plasma Membrane |
| <b>O43187</b> | Interleukin-1 receptor-associated kinase-like 2 (IRAK-2).                                                                                                                                                                                                    | Plasma Membrane |
| <b>P63252</b> | [Inward rectifier potassium channel 2 (Potassium channel, inwardly, rectifying subfamily J member 2) (Inward rectifier K(+) channel, Kir2.1) (Cardiac inward rectifier potassium channel) (IRK1).]                                                           | Plasma Membrane |
| <b>P56199</b> | [Integrin alpha-1 precursor (Laminin and collagen receptor) (VLA-1), (CD49a antigen).]                                                                                                                                                                       | Plasma Membrane |
| <b>P08648</b> | [Integrin alpha-5 precursor (Fibronectin receptor subunit alpha), (Integrin alpha-F) (VLA-5) (CD49e antigen) [Contains: Integrin alpha-5, heavy chain; Integrin alpha-5 light chain].]                                                                       | Plasma Membrane |
| <b>Q13797</b> | Integrin alpha-9 precursor (Integrin alpha-RLC).                                                                                                                                                                                                             | Plasma Membrane |
| <b>P38570</b> | [Integrin alpha-E precursor (Mucosal lymphocyte 1 antigen) (HML-1, antigen) (Integrin alpha-IEL) (CD103 antigen) [Contains: Integrin, alpha-E light chain; Integrin alpha-E heavy chain].]                                                                   | Plasma Membrane |
| <b>P11215</b> | [Integrin alpha-M precursor (Cell surface glycoprotein MAC-1 alpha, subunit) (CR-3 alpha chain) (Leukocyte adhesion receptor MO1), (Neutrophil adherence receptor) (CD11b antigen).]                                                                         | Plasma Membrane |
| <b>P05107</b> | [Integrin beta-2 precursor (Cell surface adhesion glycoproteins LFA-, 1/CR3/p150,95 subunit beta) (Complement receptor C3 subunit beta), (CD18 antigen).]                                                                                                    | Plasma Membrane |
| <b>P14151</b> | [L-selectin precursor (Lymph node homing receptor) (Leukocyte adhesion, molecule 1) (LAM-1) (Leukocyte surface antigen Leu-8) (TQ1) (gp90-MEL), (Leukocyte-endothelial cell adhesion molecule 1) (LECAM1) (CD62L, antigen).]                                 | Plasma Membrane |
| <b>Q02978</b> | [Mitochondrial 2-oxoglutarate/malate carrier protein (OGCP) (Solute, carrier family 25 member 11).]                                                                                                                                                          | Plasma Membrane |
| <b>P21439</b> | [Multidrug resistance protein 3 (EC 3.6.3.44) (ATP-binding cassette, sub-family B member 4) (P-glycoprotein 3).]                                                                                                                                             | Plasma Membrane |
| <b>Q12866</b> | [Proto-oncogene tyrosine-protein kinase MER precursor (EC 2.7.10.1) (C-, mer) (Receptor tyrosine kinase MerTK).]                                                                                                                                             | Plasma Membrane |
| <b>Q14831</b> | Metabotropic glutamate receptor 7 precursor (mGluR7).                                                                                                                                                                                                        | Plasma Membrane |
| <b>Q16653</b> | Myelin-oligodendrocyte glycoprotein precursor.                                                                                                                                                                                                               | Plasma Membrane |
| <b>O15374</b> | [Monocarboxylate transporter 5 (MCT 5) (MCT 4) (Solute carrier family, 16 member 4).]                                                                                                                                                                        | Plasma Membrane |
| <b>P33527</b> | [Multidrug resistance-associated protein 1 (ATP-binding cassette sub-, family C member 1) (Leukotriene C(4) transporter) (LTC4 transporter).]                                                                                                                | Plasma Membrane |

|               |                                                                                                                                                                                                                                                                                                                                                                               |                 |
|---------------|-------------------------------------------------------------------------------------------------------------------------------------------------------------------------------------------------------------------------------------------------------------------------------------------------------------------------------------------------------------------------------|-----------------|
| <b>P43121</b> | [Cell surface glycoprotein MUC18 precursor (Melanoma-associated antigen, MUC18) (Melanoma cell adhesion molecule) (Melanoma-associated antigen, A32) (S-endo 1 endothelial-associated antigen) (Cell surface, glycoprotein P1H12) (CD146 antigen).]                                                                                                                           | Plasma Membrane |
| <b>P25189</b> | [Myelin P0 protein precursor (Myelin protein zero) (Myelin peripheral, protein) (MPP).]                                                                                                                                                                                                                                                                                       | Plasma Membrane |
| <b>P32418</b> | [Sodium/calcium exchanger 1 precursor (Na(+)/Ca(2+)-exchange protein, 1).]                                                                                                                                                                                                                                                                                                    | Plasma Membrane |
| <b>P08473</b> | [Nepilysin (EC 3.4.24.11) (Neutral endopeptidase) (NEP), (Enkephalinase) (Neutral endopeptidase 24.11) (Atriopeptidase) (Common, acute lymphocytic leukemia antigen) (CALLA) (CD10 antigen).]                                                                                                                                                                                 | Plasma Membrane |
| <b>O76082</b> | [Organic cation/carnitine transporter 2 (Solute carrier family 22, member 5) (High-affinity sodium-dependent carnitine cotransporter).]                                                                                                                                                                                                                                       | Plasma Membrane |
| <b>Q99572</b> | [P2X purinoceptor 7 (ATP receptor) (P2X7) (Purinergic receptor) (P2Z, receptor).]                                                                                                                                                                                                                                                                                             | Plasma Membrane |
| <b>P16284</b> | [Platelet endothelial cell adhesion molecule precursor (PECAM-1), (EndoCAM) (GPIIA') (CD31 antigen).]                                                                                                                                                                                                                                                                         | Plasma Membrane |
| <b>P46059</b> | [Oligopeptide transporter, small intestine isoform (Peptide transporter, 1) (Intestinal H(+)/peptide cotransporter) (Solute carrier family 15, member 1).]                                                                                                                                                                                                                    | Plasma Membrane |
| <b>PO1833</b> | [Polymeric-immunoglobulin receptor precursor (Poly-Ig receptor) (PIGR), (Hepatocellular carcinoma-associated protein TB6) [Contains: Secretory, component].]                                                                                                                                                                                                                  | Plasma Membrane |
| <b>Q15149</b> | Plectin-1 (PLTN) (PCN) (Hemidesmosomal protein 1) (HD1) (Plectin-11).                                                                                                                                                                                                                                                                                                         | Plasma Membrane |
| <b>P40967</b> | [Melanocyte protein Pmel 17 precursor (Silver locus protein homolog), (Melanocyte lineage-specific antigen GP100) (Melanoma-associated ME20, antigen) (ME20M) (ME20-M) [Contains: ME20-S (Secreted melanoma-, associated ME20 antigen) (ME20S) (95 kDa melanocyte-specific secreted, glycoprotein)].]                                                                         | Plasma Membrane |
| <b>P10586</b> | [Receptor-type tyrosine-protein phosphatase F precursor (EC 3.1.3.48), (LAR protein) (Leukocyte antigen related).]                                                                                                                                                                                                                                                            | Plasma Membrane |
| <b>P28827</b> | [Receptor-type tyrosine-protein phosphatase mu precursor (EC 3.1.3.48), (Protein-tyrosine phosphatase mu) (R-PTP-mu).]                                                                                                                                                                                                                                                        | Plasma Membrane |
| <b>Q92692</b> | [Poliovirus receptor-related protein 2 precursor (Herpes virus entry, mediator B) (HveB) (Nectin-2) (CD112 antigen).]                                                                                                                                                                                                                                                         | Plasma Membrane |
| <b>P47804</b> | RPE-retinal G protein-coupled receptor.                                                                                                                                                                                                                                                                                                                                       | Plasma Membrane |
| <b>Q92736</b> | [Ryanodine receptor 2 (Cardiac muscle-type ryanodine receptor) (RyR2), (RYR-2) (Cardiac muscle ryanodine receptor-calcium release channel), (hRYR-2).]                                                                                                                                                                                                                        | Plasma Membrane |
| <b>P30874</b> | Somatostatin receptor type 2 (SS2R) (SRIF-1).                                                                                                                                                                                                                                                                                                                                 | Plasma Membrane |
| <b>Q9Y5Y6</b> | [Suppressor of tumorigenicity protein 14 (EC 3.4.21.109) (Serine, protease 14) (Matriptase) (Membrane-type serine protease 1) (MT-SP1), (Prostamin) (Serine protease TADG-15) (Tumor-associated, differentially-expressed gene 15 protein).]                                                                                                                                  | Plasma Membrane |
| <b>O14798</b> | [Tumor necrosis factor receptor superfamily member 10C precursor (Decoy, receptor 1) (DcR1) (Decoy TRAIL receptor without death domain) (TNF-, related apoptosis-inducing ligand receptor 3) (TRAIL receptor 3), (TRAIL-R3) (Trail receptor without an intracellular domain), (Lymphocyte inhibitor of TRAIL) (Antagonist decoy receptor for, TRAIL/Apo-2L) (CD263 antigen).] | Plasma Membrane |
| <b>O43280</b> | [Trehalase precursor (EC 3.2.1.28) (Alpha,alpha-trehalase), (Alpha,alpha-trehalose glucohydrolase).]                                                                                                                                                                                                                                                                          | Plasma Membrane |
| <b>Q16288</b> | [NT-3 growth factor receptor precursor (EC 2.7.10.1) (Neurotrophic, tyrosine kinase receptor type 3) (TrkC tyrosine kinase) (GP145-TrkC), (Trk-C).]                                                                                                                                                                                                                           | Plasma Membrane |
| <b>Q9UL62</b> | Short transient receptor potential channel 5 (TrpC5) (Htrp-5) (Htrp5).                                                                                                                                                                                                                                                                                                        | Plasma Membrane |
| <b>Q13336</b> | Urea transporter, erythrocyte.                                                                                                                                                                                                                                                                                                                                                | Plasma Membrane |
| <b>Q00341</b> | [Vigilin (High density lipoprotein-binding protein) (HDL-binding, protein).]                                                                                                                                                                                                                                                                                                  | Plasma Membrane |
| <b>P35916</b> | [Vascular endothelial growth factor receptor 3 precursor (EC 2.7.10.1), (VEGFR-3) (Tyrosine-protein kinase receptor FLT4).]                                                                                                                                                                                                                                                   | Plasma Membrane |
| <b>P41587</b> | [Vasoactive intestinal polypeptide receptor 2 precursor (VIP-R-2), (Pituitary adenylate cyclase-activating polypeptide type III receptor), (PACAP type III receptor) (PACAP-R-3) (Helodermin-preferring VIP, receptor).]                                                                                                                                                      | Plasma Membrane |
| <b>Q07157</b> | [Tight junction protein ZO-1 (Zonula occludens 1 protein) (Zona, occludens 1 protein) (Tight junction protein 1).]                                                                                                                                                                                                                                                            | Plasma Membrane |
| <b>Q9UBJ2</b> | [ATP-binding cassette sub-family D member 2 (Adrenoleukodystrophy-, related protein) (hALDR) (Adrenoleukodystrophy-like 1).]                                                                                                                                                                                                                                                  | Protein Complex |

|               |                                                                                                                                                                                                                                                                                                                  |                 |
|---------------|------------------------------------------------------------------------------------------------------------------------------------------------------------------------------------------------------------------------------------------------------------------------------------------------------------------|-----------------|
| <b>P25054</b> | Adenomatous polyposis coli protein (Protein APC).                                                                                                                                                                                                                                                                | Protein Complex |
| <b>O15145</b> | [Actin-related protein 2/3 complex subunit 3 (ARP2/3 complex 21 kDa, subunit) (p21-ARC).]                                                                                                                                                                                                                        | Protein Complex |
| <b>Q9Y4X5</b> | [Protein ariadne-1 homolog (ARI-1) (Ubiquitin-conjugating enzyme E2-, binding protein 1) (UbcH7-binding protein) (UbcM4-interacting protein), (HHARI) (H7-AP2) (Monocyte protein 6) (MOP-6).]                                                                                                                    | Protein Complex |
| <b>P20749</b> | B-cell lymphoma 3-encoded protein (Protein Bcl-3).                                                                                                                                                                                                                                                               | Protein Complex |
| <b>P51587</b> | [Breast cancer type 2 susceptibility protein (Fanconi anemia group D1, protein).]                                                                                                                                                                                                                                | Protein Complex |
| <b>P02745</b> | Complement C1q subcomponent subunit A precursor.                                                                                                                                                                                                                                                                 | Protein Complex |
| <b>P29033</b> | Gap junction beta-2 protein (Connexin-26) (Cx26).                                                                                                                                                                                                                                                                | Protein Complex |
| <b>Q14232</b> | [Translation initiation factor eIF-2B subunit alpha (eIF-2B GDP-GTP, exchange factor subunit alpha).]                                                                                                                                                                                                            | Protein Complex |
| <b>P02675</b> | Fibrinogen beta chain precursor [Contains: Fibrinopeptide B].                                                                                                                                                                                                                                                    | Protein Complex |
| <b>P69905</b> | Hemoglobin subunit alpha (Hemoglobin alpha chain) (Alpha-globin).                                                                                                                                                                                                                                                | Protein Complex |
| <b>Q08334</b> | [Interleukin-10 receptor beta chain precursor (IL-10R-B) (IL-10R2), (Cytokine receptor family 2 member 4) (Cytokine receptor class-II, member 4) (CRF2-4) (CDw210b antigen).]                                                                                                                                    | Protein Complex |
| <b>Q04637</b> | [Eukaryotic translation initiation factor 4 gamma 1 (eIF-4-gamma 1), (eIF-4G1) (eIF-4G 1) (p220).]                                                                                                                                                                                                               | Protein Complex |
| <b>P67870</b> | Casein kinase II subunit beta (CK II beta) (Phosvitin) (G5a).                                                                                                                                                                                                                                                    | Protein Complex |
| <b>O15066</b> | [Kinesin-like protein KIF3B (Microtubule plus end-directed kinesin, motor 3B) (HH0048).]                                                                                                                                                                                                                         | Protein Complex |
| <b>Q12840</b> | [Kinesin heavy chain isoform 5A (Neuronal kinesin heavy chain) (NKHC), (Kinesin heavy chain neuron-specific 1).]                                                                                                                                                                                                 | Protein Complex |
| <b>P46019</b> | [Phosphorylase b kinase regulatory subunit alpha, liver isoform, (Phosphorylase kinase alpha L subunit).]                                                                                                                                                                                                        | Protein Complex |
| <b>P08590</b> | [Myosin light polypeptide 3 (Myosin light chain 1, slow-twitch muscle, B/ventricular isoform) (MLC1SB) (Ventricular/slow twitch myosin alkali, light chain) (Cardiac myosin light chain-1) (CMLC1).]                                                                                                             | Protein Complex |
| <b>O00566</b> | [U3 small nucleolar ribonucleoprotein protein MPP10 (M phase, phosphoprotein 10).]                                                                                                                                                                                                                               | Protein Complex |
| <b>P35749</b> | [Myosin-11 (Myosin heavy chain 11) (Myosin heavy chain, smooth muscle, isoform) (SMMHC).]                                                                                                                                                                                                                        | Protein Complex |
| <b>O00329</b> | [Phosphatidylinositol-4,5-bisphosphate 3-kinase catalytic subunit delta, isoform (EC 2.7.1.153) (PI3-kinase p110 subunit delta) (PtdIns-3-, kinase p110) (PI3K) (p110delta).]                                                                                                                                    | Protein Complex |
| <b>P28065</b> | [Proteasome subunit beta type-9 precursor (EC 3.4.25.1) (Proteasome, subunit beta-1i) (Proteasome chain 7) (Macropain chain 7), (Multicatalytic endopeptidase complex chain 7) (RING12 protein) (Low, molecular mass protein 2).]                                                                                | Protein Complex |
| <b>P24386</b> | [Rab proteins geranylgeranyltransferase component A 1 (Rab escort, protein 1) (REP-1) (Choroideaemia protein) (TCD protein).]                                                                                                                                                                                    | Protein Complex |
| <b>P04844</b> | [Dolichyl-diphosphooligosaccharide--protein glycosyltransferase 63 kDa, subunit precursor (EC 2.4.1.119) (Ribophorin II) (RPN-II) (RIBIIR).]                                                                                                                                                                     | Protein Complex |
| <b>P10155</b> | [60 kDa SS-A/Ro ribonucleoprotein (60 kDa Ro protein) (60 kDa, ribonucleoprotein Ro) (RoRNP) (Ro 60 kDa autoantigen) (TROVE domain, family member 2) (Sjogren syndrome type A antigen) (SS-A) (Sjogren, syndrome antigen A2).]                                                                                   | Protein Complex |
| <b>P21283</b> | [Vacuolar ATP synthase subunit C 1 (EC 3.6.3.14) (V-ATPase subunit C 1), (Vacuolar proton pump subunit C 1).]                                                                                                                                                                                                    | Protein Complex |
| <b>Q14999</b> | Cullin-7 (CUL-7).                                                                                                                                                                                                                                                                                                | Protein Complex |
| <b>Q9Y2T4</b> | [Serine/threonine-protein phosphatase 2A 55 kDa regulatory subunit B, gamma isoform (PP2A, subunit B, B-gamma isoform) (PP2A, subunit B,, B55-gamma isoform) (PP2A, subunit B, PR55-gamma isoform) (PP2A,, subunit B, R2-gamma isoform) (IMYPNO1).]                                                              | Protein Complex |
| <b>O95782</b> | [AP-2 complex subunit alpha-1 (Adapter-related protein complex 2 alpha-, 1 subunit) (Alpha-adaptin A) (Adaptor protein complex AP-2 alpha-1, subunit) (Clathrin assembly protein complex 2 alpha-A large chain), (100 kDa coated vesicle protein A) (Plasma membrane adaptor HA2/AP2, adaptin alpha A subunit).] | Protein Complex |

|               |                                                                                                                                                                                                                                                                                                           |                 |
|---------------|-----------------------------------------------------------------------------------------------------------------------------------------------------------------------------------------------------------------------------------------------------------------------------------------------------------|-----------------|
| <b>Q9NP58</b> | [Mitochondrial ATP-binding cassette sub-family B member 6, (Mitochondrial ABC transporter 3) (Mt-ABC transporter 3), (Ubiquitously-expressed mammalian ABC half transporter) (P-, glycoprotein-related protein).]                                                                                         | Protein Complex |
| <b>O60566</b> | [Mitotic checkpoint serine/threonine-protein kinase BUB1 beta, (EC 2.7.11.1) (hBUBR1) (MAD3/BUB1-related protein kinase) (Mitotic, checkpoint kinase MAD3L) (SSK1).]                                                                                                                                      | Protein Complex |
| <b>P02746</b> | Complement C1q subcomponent subunit B precursor.                                                                                                                                                                                                                                                          | Protein Complex |
| <b>P63098</b> | [Calcineurin subunit B isoform 1 (Protein phosphatase 2B regulatory, subunit 1) (Protein phosphatase 3 regulatory subunit B alpha isoform, 1).]                                                                                                                                                           | Protein Complex |
| <b>P23511</b> | [Nuclear transcription factor Y subunit alpha (Nuclear transcription, factor Y subunit A) (NF-YA) (CAAT-box DNA-binding protein subunit A).]                                                                                                                                                              | Protein Complex |
| <b>P49336</b> | [Cell division protein kinase 8 (EC 2.7.11.22) (EC 2.7.11.23) (Protein, kinase K35).]                                                                                                                                                                                                                     | Protein Complex |
| <b>P49770</b> | [Translation initiation factor eIF-2B subunit beta (eIF-2B GDP-GTP, exchange factor subunit beta) (S20I15) (S20III15).]                                                                                                                                                                                   | Protein Complex |
| <b>P07992</b> | DNA excision repair protein ERCC-1.                                                                                                                                                                                                                                                                       | Protein Complex |
| <b>P02679</b> | Fibrinogen gamma chain precursor.                                                                                                                                                                                                                                                                         | Protein Complex |
| <b>P35573</b> | [Glycogen debranching enzyme (Glycogen debrancher) [Includes: 4-alpha-, glucanotransferase (EC 2.4.1.25) (Oligo-1,4-1,4-glycantransferase);, Amylo-alpha-1,6-glucosidase (EC 3.2.1.33) (Amylo-1,6-glucosidase), (Dextrin 6-alpha-D-glucosidase)].]                                                        | Protein Complex |
| <b>P68871</b> | [Hemoglobin subunit beta (Hemoglobin beta chain) (Beta-globin), [Contains: LVV-hemorphin-7].]                                                                                                                                                                                                             | Protein Complex |
| <b>Q9UL18</b> | [Eukaryotic translation initiation factor 2C 1 (eIF2C 1) (eIF-2C 1), (Argonaute-1) (Putative RNA-binding protein Q99).]                                                                                                                                                                                   | Protein Complex |
| <b>Q99613</b> | [Eukaryotic translation initiation factor 3 subunit 8 (eIF3 p110), (eIF3c).]                                                                                                                                                                                                                              | Protein Complex |
| <b>P10644</b> | [cAMP-dependent protein kinase type I-alpha regulatory subunit (Tissue-, specific extinguisher 1) (TSE1).]                                                                                                                                                                                                | Protein Complex |
| <b>Q00653</b> | [Nuclear factor NF-kappa-B p100 subunit (DNA-binding factor KBF2), (H2TF1) (Lymphocyte translocation chromosome 10) (Oncogene Lyt-10), (Lyt10) [Contains: Nuclear factor NF-kappa-B p52 subunit].]                                                                                                        | Protein Complex |
| <b>O14782</b> | Kinesin-like protein KIF3C.                                                                                                                                                                                                                                                                               | Protein Complex |
| <b>P49841</b> | Glycogen synthase kinase-3 beta (EC 2.7.11.26) (GSK-3 beta).                                                                                                                                                                                                                                              | Protein Complex |
| <b>P07942</b> | Laminin subunit beta-1 precursor (Laminin B1 chain).                                                                                                                                                                                                                                                      | Protein Complex |
| <b>Q9UKX2</b> | [Myosin-2 (Myosin heavy chain 2) (Myosin heavy chain 2a) (MyHC-2a), (Myosin heavy chain, skeletal muscle, adult 2) (Myosin heavy chain, IIa) (MyHC-IIa).]                                                                                                                                                 | Protein Complex |
| <b>P12883</b> | [Myosin-7 (Myosin heavy chain 7) (Myosin heavy chain, cardiac muscle, beta isoform) (MyHC-beta) (Myosin heavy chain slow isoform) (MyHC-, slow).]                                                                                                                                                         | Protein Complex |
| <b>Q9UKX3</b> | [Myosin-13 (Myosin heavy chain 13) (Myosin heavy chain, skeletal, muscle, extraocular) (MyHC-eo).]                                                                                                                                                                                                        | Protein Complex |
| <b>Q13200</b> | [26S proteasome non-ATPase regulatory subunit 2 (26S proteasome, regulatory subunit RPN1) (26S proteasome regulatory subunit S2) (26S, proteasome subunit p97) (Tumor necrosis factor type 1 receptor-, associated protein 2) (55.11 protein).]                                                           | Protein Complex |
| <b>Q12824</b> | [SWI/SNF-related matrix-associated actin-dependent regulator of, chromatin subfamily B member 1 (Integrase interactor 1 protein), (hSNF5) (BAF47).]                                                                                                                                                       | Protein Complex |
| <b>P11277</b> | Spectrin beta chain, erythrocyte (Beta-I spectrin).                                                                                                                                                                                                                                                       | Protein Complex |
| <b>P19429</b> | Troponin I, cardiac muscle (Cardiac troponin I).                                                                                                                                                                                                                                                          | Protein Complex |
| <b>Q06190</b> | [Serine/threonine-protein phosphatase 2A regulatory subunit B'' subunit, alpha (Serine/threonine-protein phosphatase 2A 72/130 kDa regulatory, subunit B) (PP2A, subunit B, B''-PR72/PR130) (PP2A, subunit B,, B72/B130 isoforms) (PP2A, subunit B, PR72/PR130 isoforms) (PP2A,, subunit B, R3 isoform).] | Protein Complex |

|               |                                                                                                                                                                                                                                                                                                                                                        |                 |
|---------------|--------------------------------------------------------------------------------------------------------------------------------------------------------------------------------------------------------------------------------------------------------------------------------------------------------------------------------------------------------|-----------------|
| <b>O94973</b> | [AP-2 complex subunit alpha-2 (Adapter-related protein complex 2 alpha-, 2 subunit) (Alpha-adaptin C) (Adaptor protein complex AP-2 alpha-2, subunit) (Clathrin assembly protein complex 2 alpha-C large chain), (100 kDa coated vesicle protein C) (Plasma membrane adaptor HA2/AP2, adaptin alpha C subunit) (Huntingtin-interacting protein HYPJ).] | Protein Complex |
| <b>Q9BZC7</b> | [ATP-binding cassette sub-family A member 2 (ATP-binding cassette, transporter 2) (ATP-binding cassette 2).]                                                                                                                                                                                                                                           | Protein Complex |
| <b>Q9UG63</b> | [ATP-binding cassette sub-family F member 2 (Iron-inhibited ABC, transporter 2).]                                                                                                                                                                                                                                                                      | Protein Complex |
| <b>P53396</b> | [ATP-citrate synthase (EC 2.3.3.8) (ATP-citrate (pro-S-)-lyase), (Citrate cleavage enzyme).]                                                                                                                                                                                                                                                           | Protein Complex |
| <b>P54709</b> | [Sodium/potassium-transporting ATPase subunit beta-3 (Sodium/potassium-, dependent ATPase beta-3 subunit) (ATPB-3) (CD298 antigen).]                                                                                                                                                                                                                   | Protein Complex |
| <b>P38398</b> | Breast cancer type 1 susceptibility protein (RING finger protein 53).                                                                                                                                                                                                                                                                                  | Protein Complex |
| <b>P11912</b> | [B-cell antigen receptor complex-associated protein alpha-chain, precursor (Ig-alpha) (MB-1 membrane glycoprotein) (Surface IgM-, associated protein) (Membrane-bound immunoglobulin-associated protein), (CD79a antigen).]                                                                                                                            | Protein Complex |
| <b>PO6730</b> | [Eukaryotic translation initiation factor 4E (eIF4E) (eIF-4E) (mRNA, cap-binding protein) (eIF-4F 25 kDa subunit).]                                                                                                                                                                                                                                    | Protein Complex |
| <b>P17302</b> | [Gap junction alpha-1 protein (Connexin-43) (Cx43) (Gap junction 43 kDa, heart protein).]                                                                                                                                                                                                                                                              | Protein Complex |
| <b>P48165</b> | [Gap junction alpha-8 protein (Connexin-50) (Cx50) (Lens fiber protein, MP70).]                                                                                                                                                                                                                                                                        | Protein Complex |
| <b>QO2108</b> | [Guanylate cyclase soluble subunit alpha-3 (EC 4.6.1.2) (GCS-alpha-3), (Soluble guanylate cyclase large subunit) (GCS-alpha-1).]                                                                                                                                                                                                                       | Protein Complex |
| <b>Q13144</b> | [Translation initiation factor eIF-2B subunit epsilon (eIF-2B GDP-GTP, exchange factor subunit epsilon).]                                                                                                                                                                                                                                              | Protein Complex |
| <b>Q81UD2</b> | [ELKS/RAB6-interacting/CAST family member 1 (RAB6-interacting protein, 2) (ERC protein 1).]                                                                                                                                                                                                                                                            | Protein Complex |
| <b>PO2671</b> | Fibrinogen alpha chain precursor [Contains: Fibrinopeptide A].                                                                                                                                                                                                                                                                                         | Protein Complex |
| <b>P80404</b> | [4-aminobutyrate aminotransferase, mitochondrial precursor, (EC 2.6.1.19) ((S)-3-amino-2-methylpropionate transaminase), (EC 2.6.1.22) (Gamma-amino-N-butyrate transaminase) (GABA, transaminase) (GABA aminotransferase) (GABA-AT) (GABA-T) (L-AIBAT).]                                                                                               | Protein Complex |
| <b>PO5538</b> | HLA class II histocompatibility antigen, DX beta chain precursor.                                                                                                                                                                                                                                                                                      | Protein Complex |
| <b>PO2042</b> | Hemoglobin subunit delta (Hemoglobin delta chain) (Delta-globin).                                                                                                                                                                                                                                                                                      | Protein Complex |
| <b>Q14240</b> | [Eukaryotic initiation factor 4A-II (EC 3.6.1.-) (ATP-dependent RNA, helicase eIF4A-2) (eIF4A-II) (eIF-4A-II).]                                                                                                                                                                                                                                        | Protein Complex |
| <b>PO8476</b> | [Inhibin beta A chain precursor (Activin beta-A chain) (Erythroid, differentiation protein) (EDF).]                                                                                                                                                                                                                                                    | Protein Complex |
| <b>QO1813</b> | [6-phosphofructokinase type C (EC 2.7.1.11) (Phosphofructokinase 1), (Phosphohexokinase) (Phosphofructo-1-kinase isozyme C) (PFK-C) (6-, phosphofructokinase, platelet type).]                                                                                                                                                                         | Protein Complex |
| <b>P31321</b> | cAMP-dependent protein kinase type I-beta regulatory subunit.                                                                                                                                                                                                                                                                                          | Protein Complex |
| <b>P22694</b> | [cAMP-dependent protein kinase, beta-catalytic subunit (EC 2.7.11.11), (PKA C-beta).]                                                                                                                                                                                                                                                                  | Protein Complex |
| <b>P33176</b> | Kinesin heavy chain (Ubiquitous kinesin heavy chain) (UKHC).                                                                                                                                                                                                                                                                                           | Protein Complex |
| <b>PO5455</b> | [Lupus La protein (Sjogren syndrome type B antigen) (SS-B) (La, ribonucleoprotein) (La autoantigen).]                                                                                                                                                                                                                                                  | Protein Complex |
| <b>P25391</b> | Laminin subunit alpha-1 precursor (Laminin A chain).                                                                                                                                                                                                                                                                                                   | Protein Complex |
| <b>P11047</b> | Laminin subunit gamma-1 precursor (Laminin B2 chain).                                                                                                                                                                                                                                                                                                  | Protein Complex |
| <b>O00160</b> | Myosin-I $\epsilon$ (Myosin-I $\epsilon$ ).                                                                                                                                                                                                                                                                                                            | Protein Complex |
| <b>P62714</b> | [Serine/threonine-protein phosphatase 2A catalytic subunit beta isoform, (EC 3.1.3.16) (PP2A-beta).]                                                                                                                                                                                                                                                   | Protein Complex |
| <b>P27986</b> | [Phosphatidylinositol 3-kinase regulatory subunit alpha (PI3-kinase p85, subunit alpha) (PtdIns-3-kinase p85-alpha) (PI3K).]                                                                                                                                                                                                                           | Protein Complex |
| <b>O94913</b> | [Pre-mRNA cleavage complex 2 protein Pcf11 (Pre-mRNA cleavage complex, II protein Pcf11) (Fragment).]                                                                                                                                                                                                                                                  | Protein Complex |
| <b>P43686</b> | [26S protease regulatory subunit 6B (Proteasome 26S subunit ATPase 4), (MIP224) (MB67-interacting protein) (TAT-binding protein 7) (TBP-7).]                                                                                                                                                                                                           | Protein Complex |

|               |                                                                                                                                                                                                                                    |                 |
|---------------|------------------------------------------------------------------------------------------------------------------------------------------------------------------------------------------------------------------------------------|-----------------|
| <b>Q16401</b> | [26S proteasome non-ATPase regulatory subunit 5 (26S proteasome subunit, S5B) (26S protease subunit S5 basic).]                                                                                                                    | Protein Complex |
| <b>P04843</b> | [Dolichyl-diphosphooligosaccharide--protein glycosyltransferase 67 kDa, subunit precursor (EC 2.4.1.119) (Ribophorin I) (RPN-I).]                                                                                                  | Protein Complex |
| <b>Q13326</b> | [Gamma-sarcoglycan (Gamma-SG) (35 kDa dystrophin-associated, glycoprotein) (35DAG).]                                                                                                                                               | Protein Complex |
| <b>P46977</b> | [Dolichyl-diphosphooligosaccharide--protein glycosyltransferase subunit, STT3A (EC 2.4.1.119) (Oligosaccharyl transferase subunit STT3A) (STT3-, A) (B5) (Integral membrane protein 1) (TMC).]                                     | Protein Complex |
| <b>Q92993</b> | [Histone acetyltransferase HTATIP (EC 2.3.1.48) (EC 2.3.1.-) (60 kDa, Tat interactive protein) (Tip60) (HIV-1 Tat interactive protein), (cPLA(2)-interacting protein).]                                                            | Protein Complex |
| <b>O00472</b> | RNA polymerase II elongation factor ELL2.                                                                                                                                                                                          | Transcription   |
| <b>Q12947</b> | [Forkhead box protein F2 (Forkhead-related protein FKHL6) (Forkhead-, related transcription factor 2) (FREAC-2) (Forkhead-related activator, 2).]                                                                                  | Transcription   |
| <b>Q15796</b> | [Mothers against decapentaplegic homolog 2 (SMAD 2) (Mothers against, DPP homolog 2) (Mad-related protein 2) (hMAD-2) (JV18-1) (hSMAD2).]                                                                                          | Transcription   |
| <b>P49848</b> | [Transcription initiation factor TFIID subunit 6 (Transcription, initiation factor TFIID 70 kDa subunit) (TAF(II)70) (TAFII-70) (TAFII-, 80) (TAFII80).]                                                                           | Transcription   |
| <b>P29374</b> | [AT-rich interactive domain-containing protein 4A (ARID domain-, containing protein 4A) (Retinoblastoma-binding protein 1) (RBBP-1).]                                                                                              | Transcription   |
| <b>P21675</b> | [Transcription initiation factor TFIID subunit 1 (EC 2.7.11.1), (Transcription initiation factor TFIID 250 kDa subunit) (TAF(II)250), (TAFII-250) (TAFII250) (TBP-associated factor 250 kDa) (p250) (Cell, cycle gene 1 protein).] | Transcription   |
| <b>Q15542</b> | [Transcription initiation factor TFIID subunit 5 (Transcription, initiation factor TFIID 100 kDa subunit) (TAF(II)100) (TAFII-100), (TAFII100).]                                                                                   | Transcription   |
| <b>O00268</b> | [Transcription initiation factor TFIID subunit 4 (TBP-associated factor, 4) (Transcription initiation factor TFIID 135 kDa subunit), (TAF(II)135) (TAFII-135) (TAFII135) (TAFII-130) (TAFII130).]                                  | Transcription   |
| <b>Q16594</b> | [Transcription initiation factor TFIID subunit 9 (Transcription, initiation factor TFIID 31 kDa subunit) (TAFII-31) (TAFII-32), (TAFII32) (STAF31/32).]                                                                            | Transcription   |
| <b>Q16514</b> | [Transcription initiation factor TFIID subunit 12 (Transcription, initiation factor TFIID 20/15 kDa subunits) (TAFII-20/TAFII-15), (TAFII20/TAFII15).]                                                                             | Transcription   |
| <b>P19801</b> | [Amiloride-sensitive amine oxidase [copper-containing] precursor, (EC 1.4.3.6) (Diamine oxidase) (DAO) (Amiloride-binding protein) (ABP), (Histaminase) (Kidney amine oxidase) (KAO).]                                             | Vesicle         |
| <b>O00116</b> | [Alkyldihydroxyacetonephosphate synthase, peroxisomal precursor, (EC 2.5.1.26) (Alkyl-DHAP synthase) (Alkylglycerone-phosphate, synthase) (Aging-associated gene 5 protein).]                                                      | Vesicle         |
| <b>P35606</b> | Coatomer subunit beta' (Beta'-coat protein) (Beta'-COP) (p102).                                                                                                                                                                    | Vesicle         |
| <b>Q9UBF2</b> | Coatomer subunit gamma-2 (Gamma-2 coat protein) (Gamma-2 COP).                                                                                                                                                                     | Vesicle         |
| <b>O60344</b> | Endothelin-converting enzyme 2 (EC 3.4.24.71) (ECE-2).                                                                                                                                                                             | Vesicle         |
| <b>P10768</b> | S-formylglutathione hydrolase (EC 3.1.2.12) (FGH) (Esterase D).                                                                                                                                                                    | Vesicle         |
| <b>P22888</b> | [Lutropin-choriogonadotropic hormone receptor precursor (LH/CG-R) (LSH-, R) (Luteinizing hormone receptor) (LHR).]                                                                                                                 | Vesicle         |
| <b>Q9Y6K5</b> | [2'-5'-oligoadenylate synthetase 3 (EC 2.7.7.-) ((2-5')oligo(A), synthetase 3) (2-5A synthetase 3) (p100 OAS) (p100OAS).]                                                                                                          | Vesicle         |
| <b>O14832</b> | [Phytanoyl-CoA dioxygenase, peroxisomal precursor (EC 1.14.11.18), (Phytanoyl-CoA alpha-hydroxylase) (PhyH) (Phytanic acid oxidase).]                                                                                              | Vesicle         |
| <b>P02787</b> | [Serotransferrin precursor (Transferrin) (Siderophilin) (Beta-1-metal-, binding globulin).]                                                                                                                                        | Vesicle         |

|               |                                                                                                                                                                                                                                                                                                                     |         |
|---------------|---------------------------------------------------------------------------------------------------------------------------------------------------------------------------------------------------------------------------------------------------------------------------------------------------------------------|---------|
| <b>P19224</b> | [UDP-glucuronosyltransferase 1-6 precursor (EC 2.4.1.17) (UDP-, glucuronosyltransferase 1A6) (UDPGT) (UGT1*6) (UGT1-06) (UGT1.6) (UGT-, 1F) (UGT1F) (Phenol-metabolizing UDP-glucuronosyltransferase).]                                                                                                             | Vesicle |
| <b>P53618</b> | Coatomer subunit beta (Beta-coat protein) (Beta-COP).                                                                                                                                                                                                                                                               | Vesicle |
| <b>O15228</b> | [Dihydroxyacetone phosphate acyltransferase (EC 2.3.1.42) (DHAP-AT), (DAP-AT) (Glycerone-phosphate O-acyltransferase) (Acyl-, CoA:dihydroxyacetonephosphateacyltransferase).]                                                                                                                                       | Vesicle |
| <b>O95822</b> | Malonyl-CoA decarboxylase, mitochondrial precursor (EC 4.1.1.9) (MCD).                                                                                                                                                                                                                                              | Vesicle |
| <b>O14880</b> | [Microsomal glutathione S-transferase 3 (EC 2.5.1.18) (Microsomal GST-, 3) (Microsomal GST-III).]                                                                                                                                                                                                                   | Vesicle |
| <b>O75146</b> | [Huntingtin-interacting protein 1-related protein (Hip1-related) (Hip, 12).]                                                                                                                                                                                                                                        | Vesicle |
| <b>O60333</b> | Kinesin-like protein KIF1B (Klp).                                                                                                                                                                                                                                                                                   | Vesicle |
| <b>Q99698</b> | Lysosomal-trafficking regulator (Beige homolog).                                                                                                                                                                                                                                                                    | Vesicle |
| <b>P22307</b> | [Nonspecific lipid-transfer protein (EC 2.3.1.176) (Propanoyl-CoA C-, acyltransferase) (NSL-TP) (Sterol carrier protein 2) (SCP-2) (Sterol, carrier protein X) (SCP-X) (SCP-chi) (SCPX).]                                                                                                                           | Vesicle |
| <b>Q9UKG9</b> | Peroxisomal carnitine O-octanoyltransferase (EC 2.3.1.137) (COT).                                                                                                                                                                                                                                                   | Vesicle |
| <b>O94855</b> | Protein transport protein Sec24D (SEC24-related protein D).                                                                                                                                                                                                                                                         | Vesicle |
| <b>O14994</b> | Synapsin-3 (Synapsin III).                                                                                                                                                                                                                                                                                          | Vesicle |
| <b>P21579</b> | Synaptotagmin-1 (Synaptotagmin I) (Sytl) (p65).                                                                                                                                                                                                                                                                     | Vesicle |
| <b>PO7550</b> | [Beta-2 adrenergic receptor (Beta-2 adrenoceptor) (Beta-2, adrenoceptor).]                                                                                                                                                                                                                                          | Vesicle |
| <b>O15254</b> | [Acyl-coenzyme A oxidase 3, peroxisomal (EC 1.3.3.6) (Pristanoyl-CoA, oxidase) (Branched-chain acyl-CoA oxidase) (BRCACoX).]                                                                                                                                                                                        | Vesicle |
| <b>P08962</b> | [CD63 antigen (Melanoma-associated antigen ME491) (Ocular melanoma-, associated antigen) (OMA81H) (Granulophysin) (Tetraspanin-30) (Tspan-, 30).]                                                                                                                                                                   | Vesicle |
| <b>P48444</b> | Coatomer subunit delta (Delta-coat protein) (Delta-COP) (Archain).                                                                                                                                                                                                                                                  | Vesicle |
| <b>P33261</b> | [Cytochrome P450 2C19 (EC 1.14.13.80) ((R)-limonene 6-monooxygenase), (EC 1.14.13.48) ((S)-limonene 6-monooxygenase) (EC 1.14.13.49) ((S)-, limonene 7-monooxygenase) (CYP11C19) (P450-11A) (Mephenytoin 4-, hydroxylase) (CYP11C17) (P450-254C).]                                                                  | Vesicle |
| <b>Q14534</b> | Squalene monooxygenase (EC 1.14.99.7) (Squalene epoxidase) (SE).                                                                                                                                                                                                                                                    | Vesicle |
| <b>P52566</b> | Rho GDP-dissociation inhibitor 2 (Rho GDI 2) (Rho-GDI beta) (Ly-GDI).                                                                                                                                                                                                                                               | Vesicle |
| <b>Q9UJM8</b> | Hydroxyacid oxidase 1 (EC 1.1.3.15) (HAOX1) (Glycolate oxidase) (GOX).                                                                                                                                                                                                                                              | Vesicle |
| <b>Q14656</b> | Transmembrane protein 187 (Protein ITBA1).                                                                                                                                                                                                                                                                          | Vesicle |
| <b>P13473</b> | [Lysosome-associated membrane glycoprotein 2 precursor (LAMP-2) (CD107b, antigen).]                                                                                                                                                                                                                                 | Vesicle |
| <b>P11717</b> | [Cation-independent mannose-6-phosphate receptor precursor (CI Man-6-P, receptor) (CI-MPR) (M6PR) (Insulin-like growth factor 2 receptor), (Insulin-like growth factor II receptor) (IGF-II receptor) (M6P/IGF2, receptor) (M6P/IGF2R) (300 kDa mannose 6-phosphate receptor) (MPR 300), (MPR300) (CD222 antigen).] | Vesicle |
| <b>O95486</b> | Protein transport protein Sec24A (SEC24-related protein A) (Fragment).                                                                                                                                                                                                                                              | Vesicle |
| <b>P48723</b> | [Stress 70 protein chaperone microsome-associated 60 kDa protein, precursor (Microsomal stress 70 protein ATPase core).]                                                                                                                                                                                            | Vesicle |
| <b>Q99805</b> | Transmembrane 9 superfamily protein member 2 precursor (p76).                                                                                                                                                                                                                                                       | Vesicle |
| <b>P47901</b> | [Vasopressin V1b receptor (V1bR) (AVPR V1b) (Vasopressin V3 receptor), (AVPR V3) (Antidiuretic hormone receptor 1b).]                                                                                                                                                                                               | Vesicle |

| Uniprot Number | Data 2 Protein Name                                                                                                                                                                                   | Component_CATEGORY |
|----------------|-------------------------------------------------------------------------------------------------------------------------------------------------------------------------------------------------------|--------------------|
| P16401         | Histone H1.5 (Histone H1a).                                                                                                                                                                           | Chromosomal        |
| P46100         | [Transcriptional regulator ATRX (EC 3.6.1.-) (ATP-dependent helicase, ATRX) (X-linked helicase II) (X-linked nuclear protein) (XNP) (Znf-, HX).]                                                      | Chromosomal        |
| P49736         | [DNA replication licensing factor MCM2 (Minichromosome maintenance, protein 2 homolog) (Nuclear protein BM28).]                                                                                       | Chromosomal        |
| P55209         | Nucleosome assembly protein 1-like 1 (NAP-1-related protein) (hNRP).                                                                                                                                  | Chromosomal        |
| Q92900         | [Regulator of nonsense transcripts 1 (EC 3.6.1.-) (ATP-dependent, helicase RENT1) (Nonsense mRNA reducing factor 1) (NORF1) (Up-, frameshift suppressor 1 homolog) (hUpf1).]                          | Chromosomal        |
| P03372         | Estrogen receptor (ER) (Estradiol receptor) (ER-alpha).                                                                                                                                               | Chromosomal        |
| P33993         | DNA replication licensing factor MCM7 (CDC47 homolog) (P1.1-MCM3).                                                                                                                                    | Chromosomal        |
| Q02224         | Centromeric protein E (CENP-E).                                                                                                                                                                       | Chromosomal        |
| Q99811         | [Paired mesoderm homeobox protein 2 (PRX-2) (Paired-related homeobox, protein 2).]                                                                                                                    | Chromosomal        |
| O14757         | Serine/threonine-protein kinase Chk1 (EC 2.7.11.1).                                                                                                                                                   | Chromosomal        |
| O14924         | Regulator of G-protein signaling 12 (RGS12).                                                                                                                                                          | Chromosomal        |
| P16403         | Histone H1.2 (Histone H1d).                                                                                                                                                                           | Chromosomal        |
| P18754         | [Regulator of chromosome condensation (Chromosome condensation protein, 1) (Cell cycle regulatory protein).]                                                                                          | Chromosomal        |
| P42704         | [Leucine-rich PPR motif-containing protein, mitochondrial precursor, (130 kDa leucine-rich protein) (LRP 130) (GP130).]                                                                               | Chromosomal        |
| P04198         | N-myc proto-oncogene protein.                                                                                                                                                                         | Chromosomal        |
| P62807         | [Histone H2B type 1-C/E/F/G/I (H2B.a/g/h/k/l) (H2B.1 A) (H2B/a) (H2B/g), (H2B/h) (H2B/k) (H2B/l).]                                                                                                    | Chromosomal        |
| P83916         | [Chromobox protein homolog 1 (Heterochromatin protein 1 homolog beta), (HP1 beta) (Modifier 1 protein) (M31) (Heterochromatin protein p25), (HP1Hsbeta) (p25beta).]                                   | Chromosomal        |
| Q13111         | [Chromatin assembly factor 1 subunit A (CAF-1 subunit A) (Chromatin, assembly factor I p150 subunit) (CAF-I 150 kDa subunit) (CAF-Ip150).]                                                            | Chromosomal        |
| Q99457         | Nucleosome assembly protein 1-like 3.                                                                                                                                                                 | Chromosomal        |
| Q99878         | Histone H2A type 1-J.                                                                                                                                                                                 | Chromosomal        |
| Q9UHN1         | [DNA polymerase subunit gamma-2, mitochondrial precursor (EC 2.7.7.7), (Mitochondrial DNA polymerase accessory subunit) (PolG-beta) (MtPolB), (DNA polymerase gamma accessory 55 kDa subunit) (p55).] | Chromosomal        |
| P06400         | Retinoblastoma-associated protein (PP110) (P105-RB) (RB).                                                                                                                                             | Chromosomal        |
| O14746         | [Telomerase reverse transcriptase (EC 2.7.7.49) (Telomerase catalytic, subunit) (HEST2) (Telomerase-associated protein 2) (TP2).]                                                                     | Chromosomal        |
| P09430         | Spermatid nuclear transition protein 1 (STP-1) (TP-1).                                                                                                                                                | Chromosomal        |
| P07199         | Major centromere autoantigen B (Centromere protein B) (CENP-B).                                                                                                                                       | Chromosomal        |
| P35452         | Homeobox protein Hox-D12 (Hox-4H).                                                                                                                                                                    | Chromosomal        |
| Q12948         | [Forkhead box protein C1 (Forkhead-related protein FKHL7) (Forkhead-, related transcription factor 3) (FREAC-3).]                                                                                     | Chromosomal        |
| Q13112         | [Chromatin assembly factor 1 subunit B (CAF-1 subunit B) (Chromatin, assembly factor I p60 subunit) (CAF-I 60 kDa subunit) (CAF-Ip60) (M-, phase phosphoprotein 7).]                                  | Chromosomal        |
| Q9UNS1         | Protein timeless homolog (hTIM).                                                                                                                                                                      | Chromosomal        |
| O00291         | Huntingtin-interacting protein 1 (HIP-I).                                                                                                                                                             | Cytoskeletal       |



|        |                                                                                                                                                                                                                                                                                                                       |              |
|--------|-----------------------------------------------------------------------------------------------------------------------------------------------------------------------------------------------------------------------------------------------------------------------------------------------------------------------|--------------|
| O43602 | [Neuronal migration protein doublecortin (Lissencephalin-X) (Lis-X), (Doublin).]                                                                                                                                                                                                                                      | Cytoskeletal |
| O75366 | Advillin (p92).                                                                                                                                                                                                                                                                                                       | Cytoskeletal |
| P11137 | Microtubule-associated protein 2 (MAP 2) (MAP-2).                                                                                                                                                                                                                                                                     | Cytoskeletal |
| P20929 | Nebulin.                                                                                                                                                                                                                                                                                                              | Cytoskeletal |
| P46821 | [Microtubule-associated protein 1B (MAP 1B) [Contains: MAP1 light chain, LC1].]                                                                                                                                                                                                                                       | Cytoskeletal |
| P49418 | Amphiphysin.                                                                                                                                                                                                                                                                                                          | Cytoskeletal |
| P52565 | Rho GDP-dissociation inhibitor 1 (Rho GDI 1) (Rho-GDI alpha).                                                                                                                                                                                                                                                         | Cytoskeletal |
| P53814 | Smoothelin.                                                                                                                                                                                                                                                                                                           | Cytoskeletal |
| Q14790 | [Caspase-8 precursor (EC 3.4.22.61) (CASP-8) (ICE-like apoptotic, protease 5) (MORT1-associated CED-3 homolog) (MACH) (FADD-homologous, ICE/CED-3-like protease) (FADD-like ICE) (FLICE) (Apoptotic cysteine, protease) (Apoptotic protease Mch-5) (CAP4) [Contains: Caspase-8, subunit p18; Caspase-8 subunit p10].] | Cytoskeletal |
| Q15814 | Tubulin-specific chaperone C (Tubulin-folding cofactor C) (CFC).                                                                                                                                                                                                                                                      | Cytoskeletal |
| Q16825 | [Tyrosine-protein phosphatase non-receptor type 21 (EC 3.1.3.48), (Protein-tyrosine phosphatase D1).]                                                                                                                                                                                                                 | Cytoskeletal |
| Q92574 | Hamartin (Tuberous sclerosis 1 protein).                                                                                                                                                                                                                                                                              | Cytoskeletal |
| Q92838 | [Ectodysplasin-A (Ectodermal dysplasia protein) (EDA protein), [Contains: Ectodysplasin-A, membrane form; Ectodysplasin-A, secreted, form].]                                                                                                                                                                          | Cytoskeletal |
| P02730 | [Band 3 anion transport protein (Anion exchange protein 1) (AE 1), (Solute carrier family 4 member 1) (CD233 antigen).]                                                                                                                                                                                               | Cytoskeletal |
| P06396 | [Gelsolin precursor (Actin-depolymerizing factor) (ADF) (Brevin), (AGEL).]                                                                                                                                                                                                                                            | Cytoskeletal |
| P27105 | [Erythrocyte band 7 integral membrane protein (Stomatin) (Protein, 7.2b).]                                                                                                                                                                                                                                            | Cytoskeletal |
| P27816 | Microtubule-associated protein 4 (MAP 4).                                                                                                                                                                                                                                                                             | Cytoskeletal |
| P35240 | [Merlin (Moesin-ezrin-radixin-like protein) (Neurofibromin-2), (Schwannomin) (Schwannomerlin).]                                                                                                                                                                                                                       | Cytoskeletal |
| P58107 | Epiplakin (450 kDa epidermal antigen).                                                                                                                                                                                                                                                                                | Cytoskeletal |
| P60981 | Destrin (Actin-depolymerizing factor) (ADF).                                                                                                                                                                                                                                                                          | Cytoskeletal |
| Q05682 | Caldesmon (CDM).                                                                                                                                                                                                                                                                                                      | Cytoskeletal |
| Q07283 | Trichohyalin.                                                                                                                                                                                                                                                                                                         | Cytoskeletal |
| Q9C0H6 | Kelch-like protein 4.                                                                                                                                                                                                                                                                                                 | Cytoskeletal |
| O14936 | [Peripheral plasma membrane protein CASK (EC 2.7.11.1) (hCASK), (Calcium/calmodulin-dependent serine protein kinase) (Lin-2 homolog).]                                                                                                                                                                                | Cytoskeletal |
| O15195 | Villin-like protein.                                                                                                                                                                                                                                                                                                  | Cytoskeletal |
| P19338 | Nucleolin (Protein C23).                                                                                                                                                                                                                                                                                              | Cytoskeletal |
| P49368 | T-complex protein 1 subunit gamma (TCP-1-gamma) (CCT-gamma) (hTRiC5).                                                                                                                                                                                                                                                 | Cytoskeletal |
| P50552 | Vasodilator-stimulated phosphoprotein (VASP).                                                                                                                                                                                                                                                                         | Cytoskeletal |
| P53355 | Death-associated protein kinase 1 (EC 2.7.11.1) (DAP kinase 1).                                                                                                                                                                                                                                                       | Cytoskeletal |
| Q13459 | Myosin-IXb (Unconventional myosin-9b).                                                                                                                                                                                                                                                                                | Cytoskeletal |
| Q14247 | Src substrate cortactin (Amplaxin) (Oncogene EMS1).                                                                                                                                                                                                                                                                   | Cytoskeletal |
| Q16658 | Fascin (Singed-like protein) (55 kDa actin-bundling protein) (p55).                                                                                                                                                                                                                                                   | Cytoskeletal |
| Q92747 | Actin-related protein 2/3 complex subunit 1A (SOP2-like protein).                                                                                                                                                                                                                                                     | Cytoskeletal |
| P07437 | Tubulin beta chain (Tubulin beta-5 chain).                                                                                                                                                                                                                                                                            | Cytoskeletal |

|        |                                                                                                                                                                                     |              |
|--------|-------------------------------------------------------------------------------------------------------------------------------------------------------------------------------------|--------------|
| P26232 | Catenin alpha-2 (Alpha-catenin-related protein) (Alpha N-catenin).                                                                                                                  | Cytoskeletal |
| P62330 | ADP-ribosylation factor 6.                                                                                                                                                          | Cytoskeletal |
| P78559 | [Microtubule-associated protein 1A (MAP 1A) (Proliferation-related, protein p80) [Contains: MAP1 light chain LC2].]                                                                 | Cytoskeletal |
| Q92974 | [Rho/Rac guanine nucleotide exchange factor 2 (GEF-H1 protein), (Proliferating cell nucleolar antigen p40).]                                                                        | Cytoskeletal |
| Q9UBN4 | [Short transient receptor potential channel 4 (TrpC4) (Trp-related, protein 4) (hTrp-4) (hTrp4).]                                                                                   | Cytoskeletal |
| Q9ULV4 | Coronin-1C (Coronin-3) (hCRNN4).                                                                                                                                                    | Cytoskeletal |
| Q9Y2M5 | [Kelch-like protein 20 (Kelch-like ECT2-interacting protein) (Kelch-, like protein X).]                                                                                             | Cytoskeletal |
| O00499 | [Myc box-dependent-interacting protein 1 (Bridging integrator 1), (Amphiphysin-like protein) (Amphiphysin II) (Box-dependent myc-, interacting protein 1).]                         | Cytoskeletal |
| O14926 | Fascin-2 (Retinal fascin).                                                                                                                                                          | Cytoskeletal |
| O15553 | Pyrin (Marenostrin).                                                                                                                                                                | Cytoskeletal |
| O60437 | [Periplakin (195 kDa cornified envelope precursor protein) (190 kDa, paraneoplastic pemphigus antigen).]                                                                            | Cytoskeletal |
| P10916 | [Myosin regulatory light chain 2, ventricular/cardiac muscle isoform, (MLC-2) (MLC-2v).]                                                                                            | Cytoskeletal |
| P21333 | [Filamin-A (Alpha-filamin) (Filamin-1) (Endothelial actin-binding, protein) (Actin-binding protein 280) (ABP-280) (Non-muscle filamin).]                                            | Cytoskeletal |
| P46939 | Utrophin (Dystrophin-related protein 1) (DRP1) (DRP).                                                                                                                               | Cytoskeletal |
| P50748 | [Kinetochores-associated protein 1 (Rough deal homolog) (hRod) (HsROD), (Rod).]                                                                                                     | Cytoskeletal |
| P54840 | Glycogen [starch] synthase, liver (EC 2.4.1.11).                                                                                                                                    | Cytoskeletal |
| Q13563 | [Polycystin-2 (Polycystic kidney disease 2 protein homolog) (Autosomal, dominant polycystic kidney disease type II protein) (Polycystin), (R48321).]                                | Cytoskeletal |
| Q13576 | Ras GTPase-activating-like protein IQGAP2.                                                                                                                                          | Cytoskeletal |
| O95198 | Kelch-like protein 2 (Actin-binding protein Mayven).                                                                                                                                | Cytoskeletal |
| O95793 | Double-stranded RNA-binding protein Staufin homolog 1.                                                                                                                              | Cytoskeletal |
| P80723 | [Brain acid soluble protein 1 (BASP1 protein) (Neuronal axonal membrane, protein NAP-22) (22 kDa neuronal tissue-enriched acidic protein).]                                         | Cytoskeletal |
| P35080 | Profilin-2 (Profilin II).                                                                                                                                                           | Cytoskeletal |
| P78352 | [Disks large homolog 4 (Postsynaptic density protein 95) (PSD-95), (Synapse-associated protein 90) (SAP90).]                                                                        | Cytoskeletal |
| Q05397 | [Focal adhesion kinase 1 (EC 2.7.10.2) (FADK 1) (pp125FAK) (Protein-, tyrosine kinase 2).]                                                                                          | Cytoskeletal |
| Q08495 | Dematin (Erythrocyte membrane protein band 4.9).                                                                                                                                    | Cytoskeletal |
| Q99426 | [Tubulin folding cofactor B (Tubulin-specific chaperone B), (Cytoskeleton-associated protein 1) (Cytoskeleton-associated protein, CKAPI).]                                          | Cytoskeletal |
| Q99439 | Calponin-2 (Calponin H2, smooth muscle) (Neutral calponin).                                                                                                                         | Cytoskeletal |
| Q99867 | Tubulin beta-4q chain.                                                                                                                                                              | Cytoskeletal |
| Q9NQ38 | [Serine protease inhibitor Kazal-type 5 precursor (Lympho-epithelial, Kazal-type-related inhibitor) (LEKT1) [Contains: Hemofiltrate peptide, HF6478; Hemofiltrate peptide HF7665].] | Cytoskeletal |
| Q9UM54 | Myosin-VI (Unconventional myosin VI).                                                                                                                                               | Cytoskeletal |
| O00410 | Importin beta-3 (Karyopherin beta-3) (Ran-binding protein 5) (RanBP5).                                                                                                              | Cytosolic    |
| O00571 | [ATP-dependent RNA helicase DDX3X (EC 3.6.1.-) (DEAD box protein 3, X-, chromosomal) (Helicase-like protein 2) (HLP2) (DEAD box, X isoform).]                                       | Cytosolic    |

|        |                                                                                                                                                                                                                                                                                                |           |
|--------|------------------------------------------------------------------------------------------------------------------------------------------------------------------------------------------------------------------------------------------------------------------------------------------------|-----------|
| O00750 | [Phosphatidylinositol-4-phosphate 3-kinase C2 domain-containing beta, polypeptide (EC 2.7.1.154) (Phosphoinositide 3-Kinase-C2-beta), (PtdIns-3-kinase C2 beta) (PI3K-C2beta) (C2-PI3K).]                                                                                                      | Cytosolic |
| O14733 | [Dual specificity mitogen-activated protein kinase kinase 7, (EC 2.7.12.2) (MAP kinase kinase 7) (MAPKK 7) (MAPK/ERK kinase 7), (JNK-activating kinase 2) (c-Jun N-terminal kinase kinase 2) (JNK, kinase 2) (JNKK 2).]                                                                        | Cytosolic |
| O14787 | Transportin-2 (Karyopherin beta-2b).                                                                                                                                                                                                                                                           | Cytosolic |
| O15111 | [Inhibitor of nuclear factor kappa-B kinase subunit alpha, (EC 2.7.11.10) (I kappa-B kinase alpha) (IkbKA) (IKK-alpha) (IKK-A), (IkkappaB kinase) (I-kappa-B kinase 1) (IKK1) (Conserved helix-loop-, helix ubiquitous kinase) (Nuclear factor NF-kappa-B inhibitor kinase, alpha) (NFKB1KA).] | Cytosolic |
| O15296 | [Arachidonate 15-lipoxygenase type II (EC 1.13.11.33) (15-LOX-2) (15-, lipoxygenase 2).]                                                                                                                                                                                                       | Cytosolic |
| O15360 | Fanconi anemia group A protein (Protein FACA).                                                                                                                                                                                                                                                 | Cytosolic |
| O15530 | 3-phosphoinositide-dependent protein kinase 1 (EC 2.7.11.1) (hPDK1).                                                                                                                                                                                                                           | Cytosolic |
| O43237 | [Cytoplasmic dynein 1 light intermediate chain 2 (Dynein light, intermediate chain 2, cytosolic) (LIC53/55) (LIC-2).]                                                                                                                                                                          | Cytosolic |
| O43291 | [Kunitz-type protease inhibitor 2 precursor (Hepatocyte growth factor, activator inhibitor type 2) (HAI-2) (Placental bikunin).]                                                                                                                                                               | Cytosolic |
| O43765 | [Small glutamine-rich tetratricopeptide repeat-containing protein A, (Vpu-binding protein) (UBP).]                                                                                                                                                                                             | Cytosolic |
| O60318 | 80 kDa MCM3-associated protein (Protein GANP).                                                                                                                                                                                                                                                 | Cytosolic |
| O60716 | [Catenin delta-1 (p120 catenin) (p120(ctn)) (Cadherin-associated Src, substrate) (CAS) (p120(cas)).]                                                                                                                                                                                           | Cytosolic |
| O75312 | Zinc finger protein ZPR1 (Zinc finger protein 259).                                                                                                                                                                                                                                            | Cytosolic |
| P07900 | [Heat shock protein HSP 90-alpha (HSP 86) (Renal carcinoma antigen NY-, REN-38).]                                                                                                                                                                                                              | Cytosolic |
| P08238 | Heat shock protein HSP 90-beta (HSP 84) (HSP 90).                                                                                                                                                                                                                                              | Cytosolic |
| P08670 | Vimentin.                                                                                                                                                                                                                                                                                      | Cytosolic |
| P09651 | [Heterogeneous nuclear ribonucleoprotein A1 (Helix-destabilizing, protein) (Single-strand RNA-binding protein) (hnRNP core protein A1).]                                                                                                                                                       | Cytosolic |
| P10071 | Zinc finger protein GLI3.                                                                                                                                                                                                                                                                      | Cytosolic |
| P10275 | Androgen receptor (Dihydrotestosterone receptor).                                                                                                                                                                                                                                              | Cytosolic |
| P12272 | [Parathyroid hormone-related protein precursor (PTH-rP) (PTHrP), [Contains: PTHrP[1-36]; PTHrP[38-94]; Osteostatin (PTHrP[107-139])].]                                                                                                                                                         | Cytosolic |
| P14598 | [Neutrophil cytosol factor 1 (NCF-1) (Neutrophil NADPH oxidase factor, 1) (47 kDa neutrophil oxidase factor) (p47-phox) (NCF-47K) (47 kDa, autosomal chronic granulomatous disease protein) (Nox organizer 2), (Nox-organizing protein 2) (SH3 and PX domain-containing protein 1A).]          | Cytosolic |
| P15428 | [15-hydroxyprostaglandin dehydrogenase [NAD+] (EC 1.1.1.141) (PGDH), (Prostaglandin dehydrogenase 1).]                                                                                                                                                                                         | Cytosolic |
| P16989 | [DNA-binding protein A (Cold shock domain-containing protein A), (Single-strand DNA-binding protein NF-GMB).]                                                                                                                                                                                  | Cytosolic |
| P17931 | [Galectin-3 (Galactose-specific lectin 3) (Mac-2 antigen) (IgE-binding, protein) (35 kDa lectin) (Carbohydrate-binding protein 35) (CBP 35), (Laminin-binding protein) (Lectin L-29) (L-31) (Galactoside-binding, protein) (GALBP).]                                                           | Cytosolic |
| P19835 | [Bile salt-activated lipase precursor (EC 3.1.1.3) (EC 3.1.1.13) (BAL), (Bile salt-stimulated lipase) (BSSL) (Carboxyl ester lipase) (Sterol, esterase) (Cholesterol esterase) (Pancreatic lysophospholipase).]                                                                                | Cytosolic |
| P20396 | [Thyroliberin precursor [Contains: Prothyroliberin; Thyroliberin, (Thyrotropin-releasing hormone) (TRH) (Thyrotropin-releasing factor), (TRF) (TSH-releasing factor) (Protirelin)].]                                                                                                           | Cytosolic |
| P42677 | 40S ribosomal protein S27 (Metallopan-stimulin 1) (MPS-1).                                                                                                                                                                                                                                     | Cytosolic |
| P42771 | [Cyclin-dependent kinase inhibitor 2A, isoforms 1/2/3 (Cyclin-dependent, kinase 4 inhibitor A) (CDK4I) (p16-INK4) (p16-INK4a) (p16INK4A), (Multiple tumor suppressor 1) (MTS1).]                                                                                                               | Cytosolic |

|        |                                                                                                                                                                                                                                                                                                                                                                                                      |           |
|--------|------------------------------------------------------------------------------------------------------------------------------------------------------------------------------------------------------------------------------------------------------------------------------------------------------------------------------------------------------------------------------------------------------|-----------|
| P43487 | [Ran-specific GTPase-activating protein (Ran-binding protein 1), (RanBP1).]                                                                                                                                                                                                                                                                                                                          | Cytosolic |
| P45877 | [Peptidyl-prolyl cis-trans isomerase C (EC 5.2.1.8) (PPIase) (Rotamase), (Cyclophilin C).]                                                                                                                                                                                                                                                                                                           | Cytosolic |
| P47712 | [Cytosolic phospholipase A2 (cPLA2) (Phospholipase A2 group IVA), [Includes: Phospholipase A2 (EC 3.1.1.4) (Phosphatidylcholine 2-, acylhydrolase); Lysophospholipase (EC 3.1.1.5).]                                                                                                                                                                                                                 | Cytosolic |
| P48147 | [Prolyl endopeptidase (EC 3.4.21.26) (Post-proline cleaving enzyme), (PE).]                                                                                                                                                                                                                                                                                                                          | Cytosolic |
| P49585 | [Choline-phosphate cytidylyltransferase A (EC 2.7.7.15), (Phosphorylcholine transferase A) (CTP:phosphocholine, cytidylyltransferase A) (CT A) (CCT A) (CCT-alpha).]                                                                                                                                                                                                                                 | Cytosolic |
| P49590 | [Probable histidyl-tRNA synthetase, mitochondrial precursor, (EC 6.1.1.21) (Histidine--tRNA ligase) (HisRS) (Histidine--tRNA, ligase-like).]                                                                                                                                                                                                                                                         | Cytosolic |
| P50452 | [Serpine B8 (Cytoplasmic antiproteinase 2) (CAP-2) (CAP2) (Proteinase, inhibitor 8).]                                                                                                                                                                                                                                                                                                                | Cytosolic |
| P50579 | [Methionine aminopeptidase 2 (EC 3.4.11.18) (MetAP 2) (Peptidase M 2), (Initiation factor 2-associated 67 kDa glycoprotein) (p67) (p67eIF2).]                                                                                                                                                                                                                                                        | Cytosolic |
| P50914 | 60S ribosomal protein L14 (CAG-ISL 7).                                                                                                                                                                                                                                                                                                                                                               | Cytosolic |
| P51003 | [Poly(A) polymerase alpha (EC 2.7.7.19) (PAP) (Polynucleotide, adenyltransferase alpha).]                                                                                                                                                                                                                                                                                                            | Cytosolic |
| P51610 | [Host cell factor (HCF) (HCF-1) (C1 factor) (VP16 accessory protein), (VCAF) (CFF) [Contains: HCF N-terminal chain 1; HCF N-terminal chain, 2; HCF N-terminal chain 3; HCF N-terminal chain 4; HCF N-terminal, chain 5; HCF N-terminal chain 6; HCF C-terminal chain 1; HCF C-, terminal chain 2; HCF C-terminal chain 3; HCF C-terminal chain 4; HCF, C-terminal chain 5; HCF C-terminal chain 6].] | Cytosolic |
| P51858 | [Hepatoma-derived growth factor (HDGF) (High-mobility group protein 1-, like 2) (HMG-1L2).]                                                                                                                                                                                                                                                                                                          | Cytosolic |
| P54252 | [Ataxin-3 (EC 3.4.22.-) (Machado-Joseph disease protein 1), (Spinocerebellar ataxia type 3 protein).]                                                                                                                                                                                                                                                                                                | Cytosolic |
| P55060 | [Exportin-2 (Exp2) (Importin-alpha re-exporter) (Chromosome segregation, 1-like protein) (Cellular apoptosis susceptibility protein).]                                                                                                                                                                                                                                                               | Cytosolic |
| P55265 | [Double-stranded RNA-specific adenosine deaminase (EC 3.5.4.-) (DRADA), (136 kDa double-stranded RNA-binding protein) (P136) (K88DSRBP), (Interferon-inducible protein 4) (IFI-4).]                                                                                                                                                                                                                  | Cytosolic |
| P55786 | Puromycin-sensitive aminopeptidase (EC 3.4.11.-) (PSA).                                                                                                                                                                                                                                                                                                                                              | Cytosolic |
| P57678 | Component of gems 4 (Gemin-4) (p97).                                                                                                                                                                                                                                                                                                                                                                 | Cytosolic |
| Q13469 | [Nuclear factor of activated T-cells, cytoplasmic 2 (T-cell, transcription factor NFAT1) (NFAT pre-existing subunit) (NF-ATp).]                                                                                                                                                                                                                                                                      | Cytosolic |
| Q13588 | GRB2-related adapter protein.                                                                                                                                                                                                                                                                                                                                                                        | Cytosolic |
| Q13596 | Sorting nexin-1.                                                                                                                                                                                                                                                                                                                                                                                     | Cytosolic |
| Q13625 | [Apoptosis-stimulating of p53 protein 2 (Tumor suppressor p53-binding, protein 2) (p53-binding protein 2) (p53BP2) (53BP2) (Bcl2-binding, protein) (Bbp) (Renal carcinoma antigen NY-REN-51).]                                                                                                                                                                                                       | Cytosolic |
| Q13867 | Bleomycin hydrolase (EC 3.4.22.40) (BLM hydrolase) (BMH) (BH).                                                                                                                                                                                                                                                                                                                                       | Cytosolic |
| Q13895 | Bystin.                                                                                                                                                                                                                                                                                                                                                                                              | Cytosolic |
| Q14028 | [Cyclic nucleotide-gated cation channel 4 (CNG channel 4) (CNG-4), (CNG4) (Cyclic nucleotide-gated cation channel modulatory subunit).]                                                                                                                                                                                                                                                              | Cytosolic |
| Q14203 | [Dynactin subunit 1 (150 kDa dynein-associated polypeptide) (DP-150), (DAP-150) (p150-glued) (p135).]                                                                                                                                                                                                                                                                                                | Cytosolic |
| Q14691 | DNA replication complex GINS protein PSF1.                                                                                                                                                                                                                                                                                                                                                           | Cytosolic |
| Q14914 | [NADP-dependent leukotriene B4 12-hydroxydehydrogenase (EC 1.3.1.74), (15-oxoprostaglandin 13-reductase) (EC 1.3.1.48).]                                                                                                                                                                                                                                                                             | Cytosolic |
| Q14978 | [Nucleolar phosphoprotein p130 (Nucleolar 130 kDa protein) (140 kDa, nucleolar phosphoprotein) (Nopp140) (Nucleolar and coiled-body, phosphoprotein 1).]                                                                                                                                                                                                                                             | Cytosolic |
| Q15013 | MAD2L1-binding protein (Caught by MAD2 protein).                                                                                                                                                                                                                                                                                                                                                     | Cytosolic |

|        |                                                                                                                                                                                                |           |
|--------|------------------------------------------------------------------------------------------------------------------------------------------------------------------------------------------------|-----------|
| Q15052 | [Rho guanine nucleotide exchange factor 6 (Rac/Cdc42 guanine nucleotide, exchange factor 6) (PAK-interacting exchange factor alpha) (Alpha-Pix), (COOL-2).]                                    | Cytosolic |
| Q15080 | [Neutrophil cytosol factor 4 (NCF-4) (Neutrophil NADPH oxidase factor, 4) (p40-phox) (p40phox) (SH3 and PX domain-containing protein 4).]                                                      | Cytosolic |
| Q15366 | Poly(rC)-binding protein 2 (Alpha-CP2) (hnRNP-E2).                                                                                                                                             | Cytosolic |
| Q15628 | [Tumor necrosis factor receptor type 1-associated DEATH domain protein, (TNFR1-associated DEATH domain protein) (TNFRSF1A-associated via death, domain).]                                      | Cytosolic |
| Q15646 | [59 kDa 2'-5'-oligoadenylate synthetase-like protein (p59 OASL), (p59OASL) (Thyroid receptor-interacting protein 14) (TRIP-14).]                                                               | Cytosolic |
| Q92540 | Protein SMG7 (SMG-7 homolog) (EST1-like protein C).                                                                                                                                            | Cytosolic |
| Q92604 | Acyl-CoA:lysophosphatidylglycerol acyltransferase 1 (EC 2.3.1.-).                                                                                                                              | Cytosolic |
| Q92793 | CREB-binding protein (EC 2.3.1.48).                                                                                                                                                            | Cytosolic |
| O76038 | Secretagogin.                                                                                                                                                                                  | Cytosolic |
| O94833 | [Bullous pemphigoid antigen 1, isoforms 6/9/10 (Trabeculin-beta), (Bullous pemphigoid antigen) (BPA) (Hemidesmosomal plaque protein), (Dystonia musculorum protein) (Dystonin).]               | Cytosolic |
| O94903 | Proline synthetase co-transcribed bacterial homolog protein.                                                                                                                                   | Cytosolic |
| O95544 | NAD kinase (EC 2.7.1.23) (Poly(P)/ATP NAD kinase).                                                                                                                                             | Cytosolic |
| O95757 | [Heat shock 70 kDa protein 4L (Osmotic stress protein 94) (Heat shock, 70-related protein APG-1).]                                                                                             | Cytosolic |
| P25815 | Protein S100-P (S100 calcium-binding protein P).                                                                                                                                               | Cytosolic |
| P01229 | [Lutropin subunit beta precursor (Luteinizing hormone subunit beta), (LSH-beta) (LSH-B) (LH-B) (Lutropin beta chain).]                                                                         | Cytosolic |
| P04066 | [Tissue alpha-L-fucosidase precursor (EC 3.2.1.51) (Alpha-L-fucosidase, I) (Alpha-L-fucoside fucohydrolase).]                                                                                  | Cytosolic |
| P04424 | Argininosuccinate lyase (EC 4.3.2.1) (Arginosuccinase) (ASAL).                                                                                                                                 | Cytosolic |
| P04637 | [Cellular tumor antigen p53 (Tumor suppressor p53) (Phosphoprotein p53), (Antigen NY-CO-13).]                                                                                                  | Cytosolic |
| P06732 | Creatine kinase M-type (EC 2.7.3.2) (Creatine kinase M chain) (M-CK).                                                                                                                          | Cytosolic |
| P07741 | Adenine phosphoribosyltransferase (EC 2.4.2.7) (APRT).                                                                                                                                         | Cytosolic |
| P22105 | Tenascin-X precursor (TN-X) (Hexabrachion-like protein).                                                                                                                                       | Cytosolic |
| P23219 | [Prostaglandin G/H synthase 1 precursor (EC 1.14.99.1) (Cyclooxygenase-, 1) (COX-1) (Prostaglandin-endoperoxide synthase 1) (Prostaglandin H2, synthase 1) (PGH synthase 1) (PGHS-1) (PHS 1).] | Cytosolic |
| P23528 | Cofilin-1 (Cofilin, non-muscle isoform) (18 kDa phosphoprotein) (p18).                                                                                                                         | Cytosolic |
| P26639 | [Threonyl-tRNA synthetase, cytoplasmic (EC 6.1.1.3) (Threonine--tRNA, ligase) (ThrRS).]                                                                                                        | Cytosolic |
| P28329 | [Choline O-acetyltransferase (EC 2.3.1.6) (CHOACTase) (Choline, acetylase) (ChAT).]                                                                                                            | Cytosolic |
| P29074 | [Tyrosine-protein phosphatase non-receptor type 4 (EC 3.1.3.48), (Protein-tyrosine phosphatase MEG1) (PTPase-MEG1) (MEG).]                                                                     | Cytosolic |
| P30626 | Sorcin (22 kDa protein) (CP-22) (V19).                                                                                                                                                         | Cytosolic |
| P30740 | [Leukocyte elastase inhibitor (LEI) (Serpine B1) (Monocyte/neutrophil, elastase inhibitor) (M/NEI) (EI).]                                                                                      | Cytosolic |
| P31350 | [Ribonucleoside-diphosphate reductase subunit M2 (EC 1.17.4.1), (Ribonucleotide reductase small subunit) (Ribonucleotide reductase, small chain).]                                             | Cytosolic |
| P31947 | 14-3-3 protein sigma (Stratifin) (Epithelial cell marker protein 1).                                                                                                                           | Cytosolic |
| P32121 | Beta-arrestin-2 (Arrestin beta 2).                                                                                                                                                             | Cytosolic |
| P34947 | [G protein-coupled receptor kinase 5 (EC 2.7.11.16) (G protein-coupled, receptor kinase GRK5).]                                                                                                | Cytosolic |

|        |                                                                                                                                                                                                 |           |
|--------|-------------------------------------------------------------------------------------------------------------------------------------------------------------------------------------------------|-----------|
| P35354 | [Prostaglandin G/H synthase 2 precursor (EC 1.14.99.1) (Cyclooxygenase-, 2) (COX-2) (Prostaglandin-endoperoxide synthase 2) (Prostaglandin H2, synthase 2) (PGH synthase 2) (PGHS-2) (PHS II).] | Cytosolic |
| P35754 | Glutaredoxin-1 (Thioltransferase-1) (TTase-1).                                                                                                                                                  | Cytosolic |
| P36871 | Phosphoglucomutase-1 (EC 5.4.2.2) (Glucose phosphomutase 1) (PGM 1).                                                                                                                            | Cytosolic |
| P39023 | 60S ribosomal protein L3 (HIV-1 TAR RNA-binding protein B) (TARBP-B).                                                                                                                           | Cytosolic |
| P40222 | Alpha-taxilin.                                                                                                                                                                                  | Cytosolic |
| P41214 | Ligatin (Hepatocellular carcinoma-associated antigen 56).                                                                                                                                       | Cytosolic |
| P41240 | [Tyrosine-protein kinase CSK (EC 2.7.10.2) (C-SRC kinase) (Protein-, tyrosine kinase CYL).]                                                                                                     | Cytosolic |
| P41279 | [Mitogen-activated protein kinase kinase kinase 8 (EC 2.7.11.25) (COT, proto-oncogene serine/threonine-protein kinase) (C-COT) (Cancer Osaka, thyroid oncogene).]                               | Cytosolic |
| P61202 | [COP9 signalosome complex subunit 2 (Signalosome subunit 2) (SGN2), (JAB1-containing signalosome subunit 2) (Thyroid receptor-interacting, protein 15) (TRIP-15) (Alien homolog).]              | Cytosolic |
| P61247 | 40S ribosomal protein S3a.                                                                                                                                                                      | Cytosolic |
| P62081 | 40S ribosomal protein S7.                                                                                                                                                                       | Cytosolic |
| P62195 | [26S protease regulatory subunit 8 (Proteasome 26S subunit ATPase 5), (Proteasome subunit p45) (p45/SUG) (Thyroid hormone receptor-, interacting protein 1) (TRIP1).]                           | Cytosolic |
| P62280 | 40S ribosomal protein S11.                                                                                                                                                                      | Cytosolic |
| P62324 | Protein BTG1 (B-cell translocation gene 1 protein).                                                                                                                                             | Cytosolic |
| P62495 | [Eukaryotic peptide chain release factor subunit 1 (eRF1) (Eukaryotic, release factor 1) (TB3-1) (Protein Cl1).]                                                                                | Cytosolic |
| P62854 | 40S ribosomal protein S26.                                                                                                                                                                      | Cytosolic |
| P78371 | T-complex protein 1 subunit beta (TCP-1-beta) (CCT-beta).                                                                                                                                       | Cytosolic |
| P78417 | Glutathione transferase omega-1 (EC 2.5.1.18) (GSTO 1-1).                                                                                                                                       | Cytosolic |
| Q01581 | [Hydroxymethylglutaryl-CoA synthase, cytoplasmic (EC 2.3.3.10) (HMG-CoA, synthase) (3-hydroxy-3-methylglutaryl coenzyme A synthase).]                                                           | Cytosolic |
| Q02878 | [60S ribosomal protein L6 (TAX-responsive enhancer element-binding, protein 107) (TAXREB107) (Neoplasm-related protein C140).]                                                                  | Cytosolic |
| Q02952 | [A-kinase anchor protein 12 (A-kinase anchor protein 250 kDa) (AKAP, 250) (Gravin) (Myasthenia gravis autoantigen).]                                                                            | Cytosolic |
| Q04760 | [Lactoylglutathione lyase (EC 4.4.1.5) (Methylglyoxalase), (Aldoketomutase) (Glyoxalase I) (Glx I) (Ketone-aldehyde mutase) (S-D-, lactoylglutathione methylglyoxal lyase).]                    | Cytosolic |
| Q05209 | [Tyrosine-protein phosphatase non-receptor type 12 (EC 3.1.3.48), (Protein-tyrosine phosphatase G1) (PTPG1) (PTP-PEST).]                                                                        | Cytosolic |
| Q05469 | Hormone-sensitive lipase (EC 3.1.1.79) (HSL).                                                                                                                                                   | Cytosolic |
| Q06141 | [Regenerating islet-derived protein 3 alpha precursor (Reg III-alpha), (Pancreatitis-associated protein 1).]                                                                                    | Cytosolic |
| Q07866 | Kinesin light chain 1 (KLC 1).                                                                                                                                                                  | Cytosolic |
| Q08499 | [cAMP-specific 3',5'-cyclic phosphodiesterase 4D (EC 3.1.4.17) (DPDE3), (PDE43).]                                                                                                               | Cytosolic |
| Q92973 | [Transportin-1 (Importin beta-2) (Karyopherin beta-2) (M9 region, interaction protein) (MIP).]                                                                                                  | Cytosolic |
| Q99259 | [Glutamate decarboxylase 1 (EC 4.1.1.15) (Glutamate decarboxylase 67, kDa isoform) (GAD-67) (67 kDa glutamic acid decarboxylase).]                                                              | Cytosolic |
| Q99469 | [SH3 and cysteine-rich domain-containing protein (SRC homology 3 and, cysteine-rich domain protein).]                                                                                           | Cytosolic |
| Q99549 | M-phase phosphoprotein 8.                                                                                                                                                                       | Cytosolic |

|        |                                                                                                                                                                                                                                                                                                                                                                                                             |           |
|--------|-------------------------------------------------------------------------------------------------------------------------------------------------------------------------------------------------------------------------------------------------------------------------------------------------------------------------------------------------------------------------------------------------------------|-----------|
| Q99873 | [Protein arginine N-methyltransferase 1 (EC 2.1.1.-) (Interferon, receptor 1-bound protein 4).]                                                                                                                                                                                                                                                                                                             | Cytosolic |
| Q99956 | [Dual specificity protein phosphatase 9 (EC 3.1.3.48) (EC 3.1.3.16), (Mitogen-activated protein kinase phosphatase 4) (MAP kinase, phosphatase 4) (MKP-4).]                                                                                                                                                                                                                                                 | Cytosolic |
| Q9NQ66 | [1-phosphatidylinositol-4,5-bisphosphate phosphodiesterase beta-1, (EC 3.1.4.11) (Phosphoinositide phospholipase C) (Phospholipase C-, beta-1) (PLC-beta-1) (PLC-I) (PLC-154).]                                                                                                                                                                                                                             | Cytosolic |
| Q9NRA0 | Sphingosine kinase 2 (EC 2.7.1.-) (SK 2) (SPK 2).                                                                                                                                                                                                                                                                                                                                                           | Cytosolic |
| Q9NSD9 | [Phenylalanyl-tRNA synthetase beta chain (EC 6.1.1.20) (Phenylalanine--, tRNA ligase beta chain) (PheRS).]                                                                                                                                                                                                                                                                                                  | Cytosolic |
| Q9UHI6 | [Probable ATP-dependent RNA helicase DDX20 (EC 3.6.1.-) (DEAD box, protein 20) (DEAD box protein DP 103) (Component of gems 3) (Gemin-3).]                                                                                                                                                                                                                                                                  | Cytosolic |
| Q9UKL6 | [Phosphatidylcholine transfer protein (PC-TP) (StAR-related lipid, transfer protein 2) (StARD2) (START domain-containing protein 2).]                                                                                                                                                                                                                                                                       | Cytosolic |
| Q9UN86 | [Ras GTPase-activating protein-binding protein 2 (G3BP-2) (GAP SH3, domain-binding protein 2).]                                                                                                                                                                                                                                                                                                             | Cytosolic |
| Q9UPN3 | [Microtubule-actin cross-linking factor 1, isoforms 1/2/3/5 (Actin, cross-linking family protein 7) (Macrophin-1) (Trabeculin-alpha) (620, kDa actin-binding protein) (ABP620).]                                                                                                                                                                                                                            | Cytosolic |
| Q9UQ13 | Leucine-rich repeat protein SHOC-2 (Ras-binding protein Sur-8).                                                                                                                                                                                                                                                                                                                                             | Cytosolic |
| Q9Y217 | Myotubularin-related protein 6 (EC 3.1.3.-).                                                                                                                                                                                                                                                                                                                                                                | Cytosolic |
| Q9Y275 | [Tumor necrosis factor ligand superfamily member 13B (TNF- and APOL-, related leukocyte expressed ligand 1) (TALL-1) (B lymphocyte, stimulator) (BLyS) (B cell-activating factor) (BAFF) (Dendritic cell-, derived TNF-like molecule) (CD257 antigen) [Contains: Tumor necrosis, factor ligand superfamily member 13b, membrane form; Tumor necrosis, factor ligand superfamily member 13b, soluble form].] | Cytosolic |
| Q9Y2Q3 | [Glutathione S-transferase kappa 1 (EC 2.5.1.18) (GST 13-13), (Glutathione S-transferase subunit 13) (GST class-kappa) (GSTK1-1), (hGSTK1).]                                                                                                                                                                                                                                                                | Cytosolic |
| Q04671 | [P protein (Melanocyte-specific transporter protein) (Pink-eyed, dilution protein homolog).]                                                                                                                                                                                                                                                                                                                | Cytosolic |
| O00170 | [AH receptor-interacting protein (AIP) (Aryl-hydrocarbon receptor-, interacting protein) (Immunophilin homolog ARA9) (HBV X-associated, protein 2) (XAP-2).]                                                                                                                                                                                                                                                | Cytosolic |
| O00244 | Copper transport protein ATOX1 (Metal transport protein ATX1).                                                                                                                                                                                                                                                                                                                                              | Cytosolic |
| O00743 | Serine/threonine-protein phosphatase 6 (EC 3.1.3.16) (PP6).                                                                                                                                                                                                                                                                                                                                                 | Cytosolic |
| O14576 | [Cytoplasmic dynein 1 intermediate chain 1 (Dynein intermediate chain, 1, cytosolic) (DH IC-1) (Cytoplasmic dynein intermediate chain 1).]                                                                                                                                                                                                                                                                  | Cytosolic |
| O43776 | [Asparaginyl-tRNA synthetase, cytoplasmic (EC 6.1.1.22) (Asparagine--, tRNA ligase) (AsnRS).]                                                                                                                                                                                                                                                                                                               | Cytosolic |
| O60493 | Sorting nexin-3 (Protein SDP3).                                                                                                                                                                                                                                                                                                                                                                             | Cytosolic |
| O60547 | [GDP-mannose 4,6 dehydratase (EC 4.2.1.47) (GDP-D-mannose dehydratase), (GMD).]                                                                                                                                                                                                                                                                                                                             | Cytosolic |
| O60880 | [SH2 domain-containing protein 1A (Signaling lymphocytic activation, molecule-associated protein) (SLAM-associated protein) (T-cell signal, transduction molecule SAP) (Duncan disease SH2-protein).]                                                                                                                                                                                                       | Cytosolic |
| O75031 | Heat shock factor 2-binding protein.                                                                                                                                                                                                                                                                                                                                                                        | Cytosolic |
| P07814 | [Bifunctional aminoacyl-tRNA synthetase [Includes: Glutamyl-tRNA, synthetase (EC 6.1.1.17) (Glutamate--tRNA ligase); Prolyl-tRNA, synthetase (EC 6.1.1.15) (Proline--tRNA ligase)].]                                                                                                                                                                                                                        | Cytosolic |
| P08294 | [Extracellular superoxide dismutase [Cu-Zn] precursor (EC 1.15.1.1), (EC-SOD).]                                                                                                                                                                                                                                                                                                                             | Cytosolic |
| P09758 | [Tumor-associated calcium signal transducer 2 precursor (Pancreatic, carcinoma marker protein GA733-1) (Cell surface glycoprotein Trop-2).]                                                                                                                                                                                                                                                                 | Cytosolic |

|        |                                                                                                                                                                                                                                                                                                                                                                                                |           |
|--------|------------------------------------------------------------------------------------------------------------------------------------------------------------------------------------------------------------------------------------------------------------------------------------------------------------------------------------------------------------------------------------------------|-----------|
| P11413 | Glucose-6-phosphate 1-dehydrogenase (EC 1.1.1.49) (G6PD).                                                                                                                                                                                                                                                                                                                                      | Cytosolic |
| P12270 | Nucleoprotein TPR.                                                                                                                                                                                                                                                                                                                                                                             | Cytosolic |
| P12429 | [Annexin A3 (Annexin-3) (Annexin III) (Lipocortin III) (Placental, anticoagulant protein III) (PAP-III) (35-alpha calcimedlin) (Inositol, 1,2-cyclic phosphate 2-phosphohydrolase).]                                                                                                                                                                                                           | Cytosolic |
| P14209 | [CD99 antigen precursor (T-cell surface glycoprotein E2) (E2 antigen), (Protein MIC2) (12E7).]                                                                                                                                                                                                                                                                                                 | Cytosolic |
| P14625 | [Endoplasmic precursor (Heat shock protein 90 kDa beta member 1) (94, kDa glucose-regulated protein) (GRP94) (gp96 homolog) (Tumor rejection, antigen 1).]                                                                                                                                                                                                                                     | Cytosolic |
| P15090 | [Fatty acid-binding protein, adipocyte (AFABP) (Adipocyte lipid-binding, protein) (ALBP) (A-FABP).]                                                                                                                                                                                                                                                                                            | Cytosolic |
| P16333 | [Cytoplasmic protein NCK1 (NCK adaptor protein 1) (SH2/SH3 adaptor, protein NCK-alpha).]                                                                                                                                                                                                                                                                                                       | Cytosolic |
| P19174 | [1-phosphatidylinositol-4,5-bisphosphate phosphodiesterase gamma-1, (EC 3.1.4.11) (Phosphoinositide phospholipase C) (PLC-gamma-1), (Phospholipase C-gamma-1) (PLC-II) (PLC-148).]                                                                                                                                                                                                             | Cytosolic |
| P19838 | [Nuclear factor NF-kappa-B p105 subunit (DNA-binding factor KBF1) (EBP-, 1) [Contains: Nuclear factor NF-kappa-B p50 subunit].]                                                                                                                                                                                                                                                                | Cytosolic |
| P41743 | [Protein kinase C iota type (EC 2.7.11.13) (nPKC-iota) (Atypical, protein kinase C-lambda/iota) (aPKC-lambda/iota) (PRKC-lambda/iota).]                                                                                                                                                                                                                                                        | Cytosolic |
| P46108 | Proto-oncogene C-crk (p38) (Adapter molecule crk).                                                                                                                                                                                                                                                                                                                                             | Cytosolic |
| P46778 | 60S ribosomal protein L21.                                                                                                                                                                                                                                                                                                                                                                     | Cytosolic |
| P48163 | NADP-dependent malic enzyme (EC 1.1.1.40) (NADP-ME) (Malic enzyme 1).                                                                                                                                                                                                                                                                                                                          | Cytosolic |
| P48200 | [Iron-responsive element-binding protein 2 (IRE-BP 2) (Iron regulatory, protein 2) (IRP2).]                                                                                                                                                                                                                                                                                                    | Cytosolic |
| P49189 | [4-trimethylaminobutyraldehyde dehydrogenase (EC 1.2.1.47) (TMABADH), (Aldehyde dehydrogenase family 9 member A1) (EC 1.2.1.3) (Aldehyde, dehydrogenase E3 isozyme) (Gamma-aminobutyraldehyde dehydrogenase), (EC 1.2.1.19) (R-aminobutyraldehyde dehydrogenase).]                                                                                                                             | Cytosolic |
| P49454 | [Centromere protein F (Kinetochore protein CENP-F) (Mitotin) (AH, antigen).]                                                                                                                                                                                                                                                                                                                   | Cytosolic |
| P49588 | [Alanine-tRNA synthetase, cytoplasmic (EC 6.1.1.7) (Alanine--tRNA, ligase) (AlaRS) (Renal carcinoma antigen NY-REN-42).]                                                                                                                                                                                                                                                                       | Cytosolic |
| P50148 | [Guanine nucleotide-binding protein G(q) subunit alpha (Guanine, nucleotide-binding protein alpha-q).]                                                                                                                                                                                                                                                                                         | Cytosolic |
| P50453 | [Serpine B9 (Cytoplasmic antiproteinase 3) (CAP-3) (CAP3) (Proteinase, inhibitor 9).]                                                                                                                                                                                                                                                                                                          | Cytosolic |
| P50747 | [Biotin--protein ligase (EC 6.3.4.-) (Biotin apo-protein ligase), [Includes: Biotin--[methylmalonyl-CoA-carboxytransferase] ligase, (EC 6.3.4.9); Biotin--[propionyl-CoA-carboxylase [ATP-hydrolyzing]], ligase (EC 6.3.4.10) (Holocarboxylase synthetase) (HCS); Biotin--, [methylcrotonoyl-CoA-carboxylase] ligase (EC 6.3.4.11); Biotin--, [acetyl-CoA-carboxylase] ligase (EC 6.3.4.15)].] | Cytosolic |
| P50991 | [T-complex protein 1 subunit delta (TCP-1-delta) (CCT-delta), (Stimulator of TAR RNA-binding).]                                                                                                                                                                                                                                                                                                | Cytosolic |
| P51114 | Fragile X mental retardation syndrome-related protein 1 (hFXR1p).                                                                                                                                                                                                                                                                                                                              | Cytosolic |
| P51178 | [1-phosphatidylinositol-4,5-bisphosphate phosphodiesterase delta-1, (EC 3.1.4.11) (Phosphoinositide phospholipase C) (PLC-delta-1), (Phospholipase C-delta-1) (PLC-III).]                                                                                                                                                                                                                      | Cytosolic |
| P53582 | [Methionine aminopeptidase 1 (EC 3.4.11.18) (MetAP 1) (MAP 1), (Peptidase M 1).]                                                                                                                                                                                                                                                                                                               | Cytosolic |
| P53667 | LIM domain kinase 1 (EC 2.7.11.1) (LIMK-1).                                                                                                                                                                                                                                                                                                                                                    | Cytosolic |
| P54253 | Ataxin-1 (Spinocerebellar ataxia type 1 protein).                                                                                                                                                                                                                                                                                                                                              | Cytosolic |
| P54577 | [Tyrosyl-tRNA synthetase, cytoplasmic (EC 6.1.1.1) (Tyrosyl-tRNA, ligase) (TyrRS).]                                                                                                                                                                                                                                                                                                            | Cytosolic |
| P55055 | [Oxysterols receptor LXR-beta (Liver X receptor beta) (Nuclear orphan, receptor LXR-beta) (Ubiquitously-expressed nuclear receptor) (Nuclear, receptor NER).]                                                                                                                                                                                                                                  | Cytosolic |
| Q13402 | Myosin-VIIa.                                                                                                                                                                                                                                                                                                                                                                                   | Cytosolic |



|        |                                                                                                                                                                                                                                                                                  |           |
|--------|----------------------------------------------------------------------------------------------------------------------------------------------------------------------------------------------------------------------------------------------------------------------------------|-----------|
| Q13438 | Protein OS-9 precursor (Amplified in osteosarcoma 9).                                                                                                                                                                                                                            | Cytosolic |
| Q13489 | [Baculoviral IAP repeat-containing protein 3 (Inhibitor of apoptosis, protein 1) (HIAP1) (HIAP-1) (C-IAP2) (TNFR2-TRAF-signaling complex, protein 1) (IAP homolog C) (Apoptosis inhibitor 2) (API2) (RING finger, protein 49).]                                                  | Cytosolic |
| Q13608 | [Peroxisome assembly factor 2 (PAF-2) (Peroxisomal-type ATPase 1), (Peroxin-6) (Peroxisomal biogenesis factor 6).]                                                                                                                                                               | Cytosolic |
| Q14164 | [Inhibitor of nuclear factor kappa-B kinase subunit epsilon, (EC 2.7.11.10) (I kappa-B kinase epsilon) (IkbKE) (IKK-epsilon) (IKK-, E) (Inducible I kappa-B kinase) (IKK-i).]                                                                                                    | Cytosolic |
| Q14204 | [Dynein heavy chain, cytosolic (DYHC) (Cytoplasmic dynein heavy chain, 1) (DHC1) (Dynein heavy chain 1, cytoplasmic 1).]                                                                                                                                                         | Cytosolic |
| Q14289 | [Protein tyrosine kinase 2 beta (EC 2.7.10.2) (Focal adhesion kinase 2), (FADK 2) (Proline-rich tyrosine kinase 2) (Cell adhesion kinase beta), (CAK beta) (Calcium-dependent tyrosine kinase) (CADTK) (Related, adhesion focal tyrosine kinase) (RAFTK).]                       | Cytosolic |
| Q14764 | Major vault protein (MVP) (Lung resistance-related protein).                                                                                                                                                                                                                     | Cytosolic |
| Q15181 | [Inorganic pyrophosphatase (EC 3.6.1.1) (Pyrophosphate phospho-, hydrolase) (PPase).]                                                                                                                                                                                            | Cytosolic |
| Q15438 | [Cytohesin-1 (PH, SEC7 and coiled-coil domain-containing protein 1), (SEC7 homolog B2-1).]                                                                                                                                                                                       | Cytosolic |
| Q15669 | [Rho-related GTP-binding protein RhoH precursor (GTP-binding protein, TTF).]                                                                                                                                                                                                     | Cytosolic |
| Q16539 | [Mitogen-activated protein kinase 14 (EC 2.7.11.24) (Mitogen-activated, protein kinase p38 alpha) (MAP kinase p38 alpha) (Cytokine suppressive, anti-inflammatory drug-binding protein) (CSAID-binding protein) (CSBP), (MAX-interacting protein 2) (MAP kinase MX12) (SAPK2A).] | Cytosolic |
| Q86W56 | Poly(ADP-ribose) glycohydrolase (EC 3.2.1.143).                                                                                                                                                                                                                                  | Cytosolic |
| Q8WUI4 | Histone deacetylase 7a (HD7a).                                                                                                                                                                                                                                                   | Cytosolic |
| Q92556 | Engulfment and cell motility protein 1 (CED-12 homolog).                                                                                                                                                                                                                         | Cytosolic |
| Q92598 | [Heat shock protein 105 kDa (Heat shock 110 kDa protein) (Antigen NY-, CO-25).]                                                                                                                                                                                                  | Cytosolic |
| Q92624 | [Amyloid protein-binding protein 2 (Amyloid beta precursor protein-, binding protein 2) (APP-BP2) (Protein interacting with APP tail 1).]                                                                                                                                        | Cytosolic |
| Q92876 | [Kallikrein-6 precursor (EC 3.4.21.-) (Protease M) (Neurosin) (Zyme), (SP59) (Serine protease 9) (Serine protease 18).]                                                                                                                                                          | Cytosolic |
| O95163 | [Elongator complex protein 1 (ELP1) (IkkappaB kinase complex-associated, protein) (IKK complex-associated protein) (p150).]                                                                                                                                                      | Cytosolic |
| O95219 | Sorting nexin-4.                                                                                                                                                                                                                                                                 | Cytosolic |
| O95239 | Chromosome-associated kinesin KIF4A (Chromokinesin-A).                                                                                                                                                                                                                           | Cytosolic |
| O95817 | [BAG family molecular chaperone regulator 3 (Bcl-2-associated, athanogene 3) (BAG-3) (Bcl-2-binding protein Bis) (Docking protein, CAIR-1).]                                                                                                                                     | Cytosolic |
| O95833 | Chloride intracellular channel protein 3.                                                                                                                                                                                                                                        | Cytosolic |
| P00326 | [Alcohol dehydrogenase 1C (EC 1.1.1.1) (Alcohol dehydrogenase subunit, gamma).]                                                                                                                                                                                                  | Cytosolic |
| P02489 | [Alpha-crystallin A chain (Heat shock protein beta-4) (HspB4), [Contains: Alpha-crystallin A chain, short form].]                                                                                                                                                                | Cytosolic |
| P02649 | Apolipoprotein E precursor (Apo-E).                                                                                                                                                                                                                                              | Cytosolic |
| P04216 | [Thy-1 membrane glycoprotein precursor (Thy-1 antigen) (CD90 antigen), (CDw90).]                                                                                                                                                                                                 | Cytosolic |
| P04731 | Metallothionein-1A (MT-1A) (Metallothionein-IA) (MT-IA).                                                                                                                                                                                                                         | Cytosolic |
| P05062 | Fructose-bisphosphate aldolase B (EC 4.1.2.13) (Liver-type aldolase).                                                                                                                                                                                                            | Cytosolic |
| P05388 | 60S acidic ribosomal protein P0 (L10E).                                                                                                                                                                                                                                          | Cytosolic |
| P06733 | [Alpha-enolase (EC 4.2.1.11) (2-phospho-D-glycerate hydro-lyase) (Non-, neural enolase) (NNE) (Enolase 1) (Phosphopyruvate hydratase) (C-myc, promoter-binding protein) (MBP-1) (MPB-1) (Plasminogen-binding, protein).]                                                         | Cytosolic |
| P06746 | DNA polymerase beta (EC 2.7.7.7) (EC 4.2.99.-).                                                                                                                                                                                                                                  | Cytosolic |

|        |                                                                                                                                                                                                              |           |
|--------|--------------------------------------------------------------------------------------------------------------------------------------------------------------------------------------------------------------|-----------|
| P06850 | [Corticoliberin precursor (Corticotropin-releasing factor) (CRF), (Corticotropin-releasing hormone).]                                                                                                        | Cytosolic |
| P23396 | 40S ribosomal protein S3.                                                                                                                                                                                    | Cytosolic |
| P24941 | Cell division protein kinase 2 (EC 2.7.11.22) (p33 protein kinase).                                                                                                                                          | Cytosolic |
| P26640 | [Valyl-tRNA synthetase (EC 6.1.1.9) (Valine--tRNA ligase) (ValRS), (Protein G7a).]                                                                                                                           | Cytosolic |
| P28838 | [Cytosol aminopeptidase (EC 3.4.11.1) (Leucine aminopeptidase) (LAP), (Leucyl aminopeptidase) (Leucine aminopeptidase 3) (Proline, aminopeptidase) (EC 3.4.11.5) (Prolyl aminopeptidase) (Peptidase S).]     | Cytosolic |
| P29590 | [Probable transcription factor PML (Tripartite motif-containing protein, 19) (RING finger protein 71).]                                                                                                      | Cytosolic |
| P30838 | [Aldehyde dehydrogenase, dimeric NADP-preferring (EC 1.2.1.5) (ALDH, class 3) (ALDHIII).]                                                                                                                    | Cytosolic |
| P30990 | [Neurotensin/neuromedin N precursor [Contains: Large neuromedin N (NmN-, 125); Neuromedin N (NmN) (NN); Neurotensin (NT); Tail peptide].]                                                                    | Cytosolic |
| P35268 | [60S ribosomal protein L22 (Epstein-Barr virus small RNA-associated, protein) (EBER-associated protein) (EAP) (Heparin-binding protein, HBp15).]                                                             | Cytosolic |
| P36575 | [Arrestin-C (Cone arrestin) (cArr) (Retinal cone arrestin-3) (X-, arrestin) (C-arrestin).]                                                                                                                   | Cytosolic |
| P40126 | [L-dopachrome tautomerase precursor (EC 5.3.3.12) (DT) (DCT) (L-, dopachrome Delta-isomerase) (Tyrosinase-related protein 2) (TRP-2), (TRP2).]                                                               | Cytosolic |
| P40227 | [T-complex protein 1 subunit zeta (TCP-1-zeta) (CCT-zeta) (CCT-zeta-1), (Tc20) (HTR3) (Acute morphine dependence-related protein 2).]                                                                        | Cytosolic |
| P41250 | Glycyl-tRNA synthetase (EC 6.1.1.14) (Glycine--tRNA ligase) (GlyRS).                                                                                                                                         | Cytosolic |
| P61163 | [Alpha-centractin (Centractin) (Centrosome-associated actin homolog), (Actin-RPV) (ARP1).]                                                                                                                   | Cytosolic |
| P61224 | Ras-related protein Rap-1b precursor (GTP-binding protein smg p21B).                                                                                                                                         | Cytosolic |
| P62241 | 40S ribosomal protein S8.                                                                                                                                                                                    | Cytosolic |
| P62263 | 40S ribosomal protein S14.                                                                                                                                                                                   | Cytosolic |
| P62861 | 40S ribosomal protein S30.                                                                                                                                                                                   | Cytosolic |
| P62913 | 60S ribosomal protein L11 (CLL-associated antigen KW-12).                                                                                                                                                    | Cytosolic |
| Q9BXW6 | [Oxysterol-binding protein-related protein 1 (OSBP-related protein 1), (ORP-1).]                                                                                                                             | Cytosolic |
| P84098 | 60S ribosomal protein L19.                                                                                                                                                                                   | Cytosolic |
| P98170 | [Baculoviral IAP repeat-containing protein 4 (Inhibitor of apoptosis, protein 3) (X-linked inhibitor of apoptosis protein) (X-linked IAP), (IAP-like protein) (HILP).]                                       | Cytosolic |
| P99999 | Cytochrome c.                                                                                                                                                                                                | Cytosolic |
| Q00597 | Fanconi anemia group C protein (Protein FACC).                                                                                                                                                               | Cytosolic |
| Q02543 | 60S ribosomal protein L18a.                                                                                                                                                                                  | Cytosolic |
| Q02790 | [FK506-binding protein 4 (EC 5.2.1.8) (Peptidyl-prolyl cis-trans, isomerase) (PPIase) (Rotamase) (p59 protein) (HSP-binding, immunophilin) (HBI) (FKBP52 protein) (52 kDa FK506-binding protein), (FKBP59).] | Cytosolic |
| Q02880 | [DNA topoisomerase 2-beta (EC 5.99.1.3) (DNA topoisomerase II, beta, isozyme).]                                                                                                                              | Cytosolic |
| Q04206 | Transcription factor p65 (Nuclear factor NF-kappa-B p65 subunit).                                                                                                                                            | Cytosolic |
| Q06187 | [Tyrosine-protein kinase BTK (EC 2.7.10.2) (Bruton tyrosine kinase), (Agammaglobulinaemia tyrosine kinase) (ATK) (B-cell progenitor kinase), (BPK).]                                                         | Cytosolic |

|        |                                                                                                                                                                                                                                                                                                   |           |
|--------|---------------------------------------------------------------------------------------------------------------------------------------------------------------------------------------------------------------------------------------------------------------------------------------------------|-----------|
| Q08188 | [Protein-glutamine gamma-glutamyltransferase E precursor (EC 2.3.2.13), (TGase E) (TGE) (TG(E)) (Transglutaminase-3) [Contains: Protein-, glutamine gamma-glutamyltransferase E 50 kDa non-catalytic chain;, Protein-glutamine gamma-glutamyltransferase E 27 kDa catalytic chain].]              | Cytosolic |
| Q12815 | Trophinin-associated protein (Tastin) (Trophinin-assisting protein).                                                                                                                                                                                                                              | Cytosolic |
| Q12882 | [Dihydropyrimidine dehydrogenase [NADP+] precursor (EC 1.3.1.2) (DPD), (DHPDHase) (Dihydrouracil dehydrogenase) (Dihydrothymine, dehydrogenase).]                                                                                                                                                 | Cytosolic |
| Q93038 | [Tumor necrosis factor receptor superfamily member 25 precursor (WSL-1, protein) (Apoptosis-mediating receptor DR3) (Apoptosis-mediating, receptor TRAMP) (Death domain receptor 3) (WSL protein) (Apoptosis-, inducing receptor AIR) (Apo-3) (Lymphocyte-associated receptor of, death) (LARD).] | Cytosolic |
| Q99593 | T-box transcription factor TBX5 (T-box protein 5).                                                                                                                                                                                                                                                | Cytosolic |
| Q99832 | [T-complex protein 1 subunit eta (TCP-1-eta) (CCT-eta) (HIV-1 Nef-, interacting protein).]                                                                                                                                                                                                        | Cytosolic |
| Q9H000 | Makorin-2 (RING finger protein 62).                                                                                                                                                                                                                                                               | Cytosolic |
| Q9NP31 | [SH2 domain-containing protein 2A (T cell-specific adapter protein), (TSA <sub>d</sub> ) (VEGF receptor-associated protein) (SH2 domain-containing, adapter protein).]                                                                                                                            | Cytosolic |
| Q9NR64 | Kelch-like protein 1.                                                                                                                                                                                                                                                                             | Cytosolic |
| Q9NRS6 | Sorting nexin-15.                                                                                                                                                                                                                                                                                 | Cytosolic |
| Q9NX02 | [NACHT, LRR and PYD domains-containing protein 2 (PYRIN domain and, NACHT domain-containing protein 1) (PYRIN-containing APAF1-like, protein 2) (Nucleotide-binding site protein 1).]                                                                                                             | Cytosolic |
| Q9UGI0 | Zinc finger Ran-binding domain-containing protein 1 (Protein TRABID).                                                                                                                                                                                                                             | Cytosolic |
| Q9UHD4 | [Cell death activator CIDE-B (Cell death-inducing DFFA-like effector, B).]                                                                                                                                                                                                                        | Cytosolic |
| Q9UIA9 | Exportin-7 (Exp7) (Ran-binding protein 16).                                                                                                                                                                                                                                                       | Cytosolic |
| Q9UJW3 | DNA (cytosine-5)-methyltransferase 3-like.                                                                                                                                                                                                                                                        | Cytosolic |
| Q9UK41 | Vacuolar protein sorting-associated protein 28 homolog (H-Vps28).                                                                                                                                                                                                                                 | Cytosolic |
| Q9UKV0 | [Histone deacetylase 9 (HD9) (HD7B) (HD7) (Histone deacetylase-related, protein) (MEF2-interacting transcription repressor MITR).]                                                                                                                                                                | Cytosolic |
| Q9UMR2 | [ATP-dependent RNA helicase DDX19B (EC 3.6.1.-) (DEAD box protein 19B), (DEAD box RNA helicase DEAD5).]                                                                                                                                                                                           | Cytosolic |
| Q9UQL6 | Histone deacetylase 5 (HD5) (Antigen NY-CO-9).                                                                                                                                                                                                                                                    | Cytosolic |
| Q9Y2G2 | [Caspase recruitment domain-containing protein 8 (Apoptotic protein, NDPP1) (DACAR) (CARD-inhibitor of NF-kappa-B-activating ligand), (CARDINAL) (Tumor up-regulated CARD-containing antagonist of CASP9), (TUCAN).]                                                                              | Cytosolic |
| O00154 | [Cytosolic acyl coenzyme A thioester hydrolase (EC 3.1.2.2) (Long chain, acyl-CoA thioester hydrolase) (CTE-II) (CTE-IIa) (Brain acyl-CoA, hydrolase) (Acyl-CoA thioesterase 7).]                                                                                                                 | Cytosolic |
| O00192 | Armadillo repeat protein deleted in velo-cardio-facial syndrome.                                                                                                                                                                                                                                  | Cytosolic |
| O00311 | [Cell division cycle 7-related protein kinase (EC 2.7.11.1) (CDC7-, related kinase) (HsCdc7) (huCdc7).]                                                                                                                                                                                           | Cytosolic |
| O00418 | [Elongation factor 2 kinase (EC 2.7.11.20) (eEF-2 kinase) (eEF-2K), (Calcium/calmodulin-dependent eukaryotic elongation factor 2 kinase).]                                                                                                                                                        | Cytosolic |
| O14641 | [Segment polarity protein dishevelled homolog DVL-2 (Dishevelled-2), (DSH homolog 2).]                                                                                                                                                                                                            | Cytosolic |
| O14893 | [Survival of motor neuron protein-interacting protein 1 (SMN-, interacting protein 1) (Component of gems 2) (Gemin-2).]                                                                                                                                                                           | Cytosolic |
| O15294 | [UDP-N-acetylglucosamine--peptide N-acetylglucosaminyltransferase 110, kDa subunit (EC 2.4.1.-) (O-GlcNAc transferase subunit p110) (O-linked, N-acetylglucosamine transferase 110 kDa subunit).]                                                                                                 | Cytosolic |
| O43281 | Embryonal Fyn-associated substrate (HEFS).                                                                                                                                                                                                                                                        | Cytosolic |

|        |                                                                                                                                                                                                                                                                                         |           |
|--------|-----------------------------------------------------------------------------------------------------------------------------------------------------------------------------------------------------------------------------------------------------------------------------------------|-----------|
| O43927 | [Small-inducible cytokine B13 precursor (CXCL13) (B lymphocyte, chemoattractant) (CXC chemokine BLC) (B cell-attracting chemokine 1), (BCA-1) (ANGIE).]                                                                                                                                 | Cytosolic |
| O60760 | [Glutathione-requiring prostaglandin D synthase (EC 5.3.99.2), (Glutathione-dependent PGD synthetase) (Prostaglandin-H2 D-isomerase), (Hematopoietic prostaglandin D synthase) (H-PGDS).]                                                                                               | Cytosolic |
| O75791 | [GRB2-related adapter protein 2 (GADS protein) (Growth factor receptor-, binding protein) (GRBLG) (Grf40 adapter protein) (Grf-40) (GRB-2-like, protein) (GRB2L) (GRBX) (P38) (Hematopoietic cell-associated adapter, protein GrpL) (Adapter protein GRID) (SH3-SH2-SH3 adapter Mona).] | Cytosolic |
| O75912 | [Diacylglycerol kinase iota (EC 2.7.1.107) (Diglyceride kinase iota), (DGK-iota) (DAG kinase iota).]                                                                                                                                                                                    | Cytosolic |
| P07948 | Tyrosine-protein kinase Lyn (EC 2.7.10.2).                                                                                                                                                                                                                                              | Cytosolic |
| P08151 | Zinc finger protein GLI1 (Glioma-associated oncogene) (Oncogene GLI).                                                                                                                                                                                                                   | Cytosolic |
| P08758 | [Annexin A5 (Annexin-5) (Annexin V) (Lipocortin V) (Endonexin II), (Calphobindin I) (CBP-I) (Placental anticoagulant protein I) (PAP-I), (PP4) (Thromboplastin inhibitor) (Vascular anticoagulant-alpha) (VAC-, alpha) (Anchorin CII).]                                                 | Cytosolic |
| P08949 | Neuromedin-B precursor [Contains: Neuromedin-B-32; Neuromedin-B].                                                                                                                                                                                                                       | Cytosolic |
| P09525 | [Annexin A4 (Annexin-4) (Annexin IV) (Lipocortin IV) (Endonexin I), (Chromobindin-4) (Protein II) (P32.5) (Placental anticoagulant protein, II) (PAP-II) (PP4-X) (35-beta calcimedlin) (Carbohydrate-binding, protein P33/P41) (P33/41).]                                               | Cytosolic |
| P11940 | Polyadenylate-binding protein 1 (Poly(A)-binding protein 1) (PABP 1).                                                                                                                                                                                                                   | Cytosolic |
| P12271 | [Retinaldehyde-binding protein 1 (Cellular retinaldehyde-binding, protein).]                                                                                                                                                                                                            | Cytosolic |
| P13796 | [Plastin-2 (L-plastin) (Lymphocyte cytosolic protein 1) (LCP-1), (LC64P).]                                                                                                                                                                                                              | Cytosolic |
| P13861 | cAMP-dependent protein kinase type II-alpha regulatory subunit.                                                                                                                                                                                                                         | Cytosolic |
| P14618 | [Pyruvate kinase isozymes M1/M2 (EC 2.7.1.40) (Pyruvate kinase muscle, isozyme) (Pyruvate kinase 2/3) (Cytosolic thyroid hormone-binding, protein) (CTHBP) (THBP1).]                                                                                                                    | Cytosolic |
| P14923 | [Junction plakoglobin (Desmoplakin-3) (Desmoplakin III) (Catenin, gamma).]                                                                                                                                                                                                              | Cytosolic |
| P15170 | [G1 to S phase transition protein 1 homolog (GTP-binding protein GST1-, HS).]                                                                                                                                                                                                           | Cytosolic |
| P15559 | [NAD(P)H dehydrogenase [quinone] 1 (EC 1.6.5.2) (Quinone reductase 1), (NAD(P)H:quinone oxidoreductase 1) (QR1) (DT-diaphorase) (DTD), (Azoreductase) (Phylloquinone reductase) (Menadione reductase).]                                                                                 | Cytosolic |
| P18124 | 60S ribosomal protein L7.                                                                                                                                                                                                                                                               | Cytosolic |
| P18509 | [Pituitary adenylate cyclase-activating polypeptide precursor (PACAP), [Contains: PACAP-related peptide (PRP-48); Pituitary adenylate, cyclase-activating polypeptide 27 (PACAP-27) (PACAP27); Pituitary, adenylate cyclase-activating polypeptide 38 (PACAP-38) (PACAP38)].]           | Cytosolic |
| P20591 | [Interferon-induced GTP-binding protein Mx1 (Interferon-regulated, resistance GTP-binding protein MxA) (Interferon-induced protein p78), (IFI-78K).]                                                                                                                                    | Cytosolic |
| P20936 | [Ras GTPase-activating protein 1 (GTPase-activating protein) (GAP) (Ras, p21 protein activator) (p120GAP) (RasGAP).]                                                                                                                                                                    | Cytosolic |
| P21399 | [Iron-responsive element-binding protein 1 (IRE-BP 1) (Iron regulatory, protein 1) (IRP1) (Ferritin repressor protein) (Aconitate hydratase), (EC 4.2.1.3) (Citrate hydro-lyase) (Aconitase).]                                                                                          | Cytosolic |
| P43403 | [Tyrosine-protein kinase ZAP-70 (EC 2.7.10.2) (70 kDa zeta-associated, protein) (Syk-related tyrosine kinase).]                                                                                                                                                                         | Cytosolic |
| P46060 | Ran GTPase-activating protein 1.                                                                                                                                                                                                                                                        | Cytosolic |
| P46782 | 40S ribosomal protein S5.                                                                                                                                                                                                                                                               | Cytosolic |
| P49589 | [CysteinyI-tRNA synthetase, cytoplasmic (EC 6.1.1.16) (Cysteine--tRNA, ligase) (CysRS).]                                                                                                                                                                                                | Cytosolic |
| P49815 | Tuberin (Tuberous sclerosis 2 protein).                                                                                                                                                                                                                                                 | Cytosolic |

|        |                                                                                                                                                                                                                                                                                                                                  |           |
|--------|----------------------------------------------------------------------------------------------------------------------------------------------------------------------------------------------------------------------------------------------------------------------------------------------------------------------------------|-----------|
| P49914 | [5-formyltetrahydrofolate cyclo-ligase (EC 6.3.3.2) (5,10-methenyl-, tetrahydrofolate synthetase) (Methenyl-THF synthetase) (MTHFS).]                                                                                                                                                                                            | Cytosolic |
| P50502 | [Hsc70-interacting protein (Hip) (Suppression of tumorigenicity protein, 13) (Putative tumor suppressor ST13) (Protein FAM10A1) (Progesterone, receptor-associated p48 protein) (Renal carcinoma antigen NY-REN-33).]                                                                                                            | Cytosolic |
| P50570 | Dynamin-2 (EC 3.6.5.5).                                                                                                                                                                                                                                                                                                          | Cytosolic |
| P50995 | [Annexin A11 (Annexin-11) (Annexin XI) (Calcyclin-associated annexin, 50) (CAP-50) (56 kDa autoantigen).]                                                                                                                                                                                                                        | Cytosolic |
| P51570 | Galactokinase (EC 2.7.1.6) (Galactose kinase).                                                                                                                                                                                                                                                                                   | Cytosolic |
| P51606 | [N-acylglucosamine 2-epimerase (EC 5.1.3.8) (GlcNAc 2-epimerase) (N-, acetyl-D-glucosamine 2-epimerase) (AGE) (Renin-binding protein), (RnBP).]                                                                                                                                                                                  | Cytosolic |
| P51854 | [Transketolase-like protein 1 (EC 2.2.1.1) (Transketolase 2) (TK 2), (Transketolase-related protein).]                                                                                                                                                                                                                           | Cytosolic |
| P53367 | Arfaptin-1 (ADP-ribosylation factor-interacting protein 1).                                                                                                                                                                                                                                                                      | Cytosolic |
| P53671 | LIM domain kinase 2 (EC 2.7.11.1) (LIMK-2).                                                                                                                                                                                                                                                                                      | Cytosolic |
| P53778 | [Mitogen-activated protein kinase 12 (EC 2.7.11.24) (Extracellular, signal-regulated kinase 6) (ERK-6) (ERK5) (Stress-activated protein, kinase 3) (Mitogen-activated protein kinase p38 gamma) (MAP kinase p38, gamma).]                                                                                                        | Cytosolic |
| P55072 | [Transitional endoplasmic reticulum ATPase (TER ATPase) (15S Mg(2+)-, ATPase p97 subunit) (Valosin-containing protein) (VCP).]                                                                                                                                                                                                   | Cytosolic |
| P56524 | Histone deacetylase 4 (HD4).                                                                                                                                                                                                                                                                                                     | Cytosolic |
| P57075 | [Suppressor of T-cell receptor signaling 2 (STS-2) (Cbl-interacting, protein 4) (CLIP4) (T-cell ubiquitin ligand) (TULA).]                                                                                                                                                                                                       | Cytosolic |
| Q13418 | [Integrin-linked protein kinase (EC 2.7.11.1) (ILK-1) (ILK-2) (59 kDa, serine/threonine-protein kinase) (p59ILK).]                                                                                                                                                                                                               | Cytosolic |
| Q13547 | Histone deacetylase 1 (HD1).                                                                                                                                                                                                                                                                                                     | Cytosolic |
| Q13614 | Myotubularin-related protein 2 (EC 3.1.3.-).                                                                                                                                                                                                                                                                                     | Cytosolic |
| Q14142 | Tripartite motif-containing protein 14.                                                                                                                                                                                                                                                                                          | Cytosolic |
| Q14974 | [Importin subunit beta-1 (Karyopherin subunit beta-1) (Nuclear factor, P97) (Importin 90).]                                                                                                                                                                                                                                      | Cytosolic |
| Q15019 | Septin-2 (Protein NEDD5).                                                                                                                                                                                                                                                                                                        | Cytosolic |
| Q15046 | Lysyl-tRNA synthetase (EC 6.1.1.6) (Lysine--tRNA ligase) (LysRS).                                                                                                                                                                                                                                                                | Cytosolic |
| Q15139 | [Serine/threonine-protein kinase D1 (EC 2.7.11.13) (nPKC-D1) (Protein, kinase D) (Protein kinase C mu type) (nPKC-mu).]                                                                                                                                                                                                          | Cytosolic |
| Q16760 | [Diacylglycerol kinase delta (EC 2.7.1.107) (Diglyceride kinase delta), (DGK-delta) (DAG kinase delta) (130 kDa diacylglycerol kinase).]                                                                                                                                                                                         | Cytosolic |
| Q76083 | [High affinity cGMP-specific 3',5'-cyclic phosphodiesterase 9A, (EC 3.1.4.35).]                                                                                                                                                                                                                                                  | Cytosolic |
| O95164 | [Ubiquitin-like protein 3 precursor (Membrane-anchored ubiquitin-fold, protein) (MUB) (HsMUB) (Protein HCG-1).]                                                                                                                                                                                                                  | Cytosolic |
| O95433 | Activator of 90 kDa heat shock protein ATPase homolog 1 (AHA1) (p38).                                                                                                                                                                                                                                                            | Cytosolic |
| O95644 | [Nuclear factor of activated T-cells, cytoplasmic 1 (NFAT transcription, complex cytosolic component) (NF-ATc1) (NF-ATc).]                                                                                                                                                                                                       | Cytosolic |
| O95954 | [Formimidoyltransferase-cyclodeaminase (Formiminotransferase-, cyclodeaminase) (FTCD) (LCHC1) [Includes: Glutamate, formimidoyltransferase (EC 2.1.2.5) (Glutamate formiminotransferase), (Glutamate formyltransferase); Formimidoyltetrahydrofolate, cyclodeaminase (EC 4.3.1.4) (Formiminotetrahydrofolate, cyclodeaminase)].] | Cytosolic |
| P25963 | [NF-kappa-B inhibitor alpha (Major histocompatibility complex enhancer-, binding protein MAD3) (I-kappa-B-alpha) (IkappaBalph) (Ikb-alpha).]                                                                                                                                                                                     | Cytosolic |
| P00338 | [L-lactate dehydrogenase A chain (EC 1.1.1.27) (LDH-A) (LDH muscle, subunit) (LDH-M) (Renal carcinoma antigen NY-REN-59) (Cell, proliferation-inducing gene 19 protein).]                                                                                                                                                        | Cytosolic |

|        |                                                                                                                                                                                                                                                                                                                                                                                                                                                |           |
|--------|------------------------------------------------------------------------------------------------------------------------------------------------------------------------------------------------------------------------------------------------------------------------------------------------------------------------------------------------------------------------------------------------------------------------------------------------|-----------|
| P01189 | [Corticotropin-lipotropin precursor (Pro-opiomelanocortin) (POMC), [Contains: NPP; Melanotropin gamma (Gamma-MSH); Potential peptide;, Corticotropin (Adrenocorticotrophic hormone) (ACTH); Melanotropin alpha, (Alpha-MSH); Corticotropin-like intermediary peptide (CLIP);, Lipotropin beta (Beta-LPH); Lipotropin gamma (Gamma-LPH); Melanotropin, beta (Beta-MSH); Beta-endorphin; Met-enkephalin].]                                       | Cytosolic |
| P01215 | [Glycoprotein hormones alpha chain precursor (Anterior pituitary, glycoprotein hormones common subunit alpha) (Follitropin alpha chain), (Follicle stimulating hormone alpha chain) (FSH-alpha) (Lutropin alpha, chain) (Luteinizing hormone alpha chain) (LSH-alpha) (Thyrotropin, alpha chain) (Thyroid-stimulating hormone alpha chain) (TSH-alpha), (Choriogonadotropin alpha chain) (Chorionic gonadotrophin alpha, subunit) (CG-alpha).] | Cytosolic |
| P01375 | [Tumor necrosis factor precursor (TNF-alpha) (Tumor necrosis factor, ligand superfamily member 2) (TNF-a) (Cachectin) [Contains: Tumor, necrosis factor, membrane form; Tumor necrosis factor, soluble form].]                                                                                                                                                                                                                                 | Cytosolic |
| P02511 | [Alpha-crystallin B chain (Alpha(B)-crystallin) (Rosenthal fiber, component) (Heat shock protein beta-5) (HspB5) (Renal carcinoma, antigen NY-REN-27).]                                                                                                                                                                                                                                                                                        | Cytosolic |
| P05089 | Arginase-1 (EC 3.5.3.1) (Type I arginase) (Liver-type arginase).                                                                                                                                                                                                                                                                                                                                                                               | Cytosolic |
| P07195 | [L-lactate dehydrogenase B chain (EC 1.1.1.27) (LDH-B) (LDH heart, subunit) (LDH-H) (Renal carcinoma antigen NY-REN-46).]                                                                                                                                                                                                                                                                                                                      | Cytosolic |
| P07205 | [Phosphoglycerate kinase 2 (EC 2.7.2.3) (Phosphoglycerate kinase,, testis specific).]                                                                                                                                                                                                                                                                                                                                                          | Cytosolic |
| P21673 | [Diamine acetyltransferase 1 (EC 2.3.1.57) (Spermidine/spermine N(1)-, acetyltransferase 1) (SSAT) (SSAT-1) (Putrescine acetyltransferase), (Polyamine N-acetyltransferase 1).]                                                                                                                                                                                                                                                                | Cytosolic |
| P23526 | [Adenosylhomocysteinase (EC 3.3.1.1) (S-adenosyl-L-homocysteine, hydrolase) (AdoHcyase).]                                                                                                                                                                                                                                                                                                                                                      | Cytosolic |
| P26373 | 60S ribosomal protein L13 (Breast basic conserved protein 1).                                                                                                                                                                                                                                                                                                                                                                                  | Cytosolic |
| P26651 | [Tristetraproline (TTP) (Zinc finger protein 36 homolog) (Zfp-36), (Protein TIS11A) (TIS11) (Growth factor-inducible nuclear protein, NUP475) (G0/G1 switch regulatory protein 24).]                                                                                                                                                                                                                                                           | Cytosolic |
| P27037 | [Activin receptor type-2A precursor (EC 2.7.11.30) (Activin receptor, type IIA) (ACTR-IIA) (ACTRIIA).]                                                                                                                                                                                                                                                                                                                                         | Cytosolic |
| P27797 | Calreticulin precursor (CRP55) (Calregulin) (HACBP) (ERp60) (grp60).                                                                                                                                                                                                                                                                                                                                                                           | Cytosolic |
| P29992 | [Guanine nucleotide-binding protein subunit alpha-11 (G alpha-11), (Guanine nucleotide-binding protein G(y) subunit alpha).]                                                                                                                                                                                                                                                                                                                   | Cytosolic |
| P30305 | [M-phase inducer phosphatase 2 (EC 3.1.3.48) (Dual specificity, phosphatase Cdc25B).]                                                                                                                                                                                                                                                                                                                                                          | Cytosolic |
| P31749 | [RAC-alpha serine/threonine-protein kinase (EC 2.7.11.1) (RAC-PK-alpha), (Protein kinase B) (PKB) (C-AKT).]                                                                                                                                                                                                                                                                                                                                    | Cytosolic |
| P31949 | [Protein S100-A11 (S100 calcium-binding protein A11) (Protein S100C), (Calgizzarin) (MLN 70).]                                                                                                                                                                                                                                                                                                                                                 | Cytosolic |
| P32119 | [Peroxiredoxin-2 (EC 1.11.1.15) (Thioredoxin peroxidase 1), (Thioredoxin-dependent peroxide reductase 1) (Thiol-specific, antioxidant protein) (TSA) (PRP) (Natural killer cell-enhancing factor, B) (NKEF-B).]                                                                                                                                                                                                                                | Cytosolic |
| P35236 | [Tyrosine-protein phosphatase non-receptor type 7 (EC 3.1.3.48), (Protein-tyrosine phosphatase LC-PTP) (Hematopoietic protein-tyrosine, phosphatase) (HEPTP).]                                                                                                                                                                                                                                                                                 | Cytosolic |
| P35568 | Insulin receptor substrate 1 (IRS-1).                                                                                                                                                                                                                                                                                                                                                                                                          | Cytosolic |
| P35998 | [26S protease regulatory subunit 7 (Proteasome 26S subunit ATPase 2), (Protein MSS1).]                                                                                                                                                                                                                                                                                                                                                         | Cytosolic |
| P39019 | 40S ribosomal protein S19.                                                                                                                                                                                                                                                                                                                                                                                                                     | Cytosolic |
| P40763 | [Signal transducer and activator of transcription 3 (Acute-phase, response factor).]                                                                                                                                                                                                                                                                                                                                                           | Cytosolic |
| P41252 | [Isoleucyl-tRNA synthetase, cytoplasmic (EC 6.1.1.5) (Isoleucine--tRNA, ligase) (IleRS) (IRS).]                                                                                                                                                                                                                                                                                                                                                | Cytosolic |
| P60484 | [Phosphatidylinositol-3,4,5-trisphosphate 3-phosphatase and dual-, specificity protein phosphatase PTEN (EC 3.1.3.67) (EC 3.1.3.16), (EC 3.1.3.48) (Phosphatase and tensin homolog) (Mutated in multiple, advanced cancers 1).]                                                                                                                                                                                                                | Cytosolic |
| P61201 | [COP9 signalosome complex subunit 2 (Signalosome subunit 2) (SGN2), (JAB1-containing signalosome subunit 2) (Thyroid receptor-interacting, protein 15) (TRIP-15) (Alien homolog).]                                                                                                                                                                                                                                                             | Cytosolic |

|        |                                                                                                                                                                                                                                                                 |           |
|--------|-----------------------------------------------------------------------------------------------------------------------------------------------------------------------------------------------------------------------------------------------------------------|-----------|
| P61927 | 60S ribosomal protein L37 (G1.16).                                                                                                                                                                                                                              | Cytosolic |
| P62249 | 40S ribosomal protein S16.                                                                                                                                                                                                                                      | Cytosolic |
| P62266 | 40S ribosomal protein S23.                                                                                                                                                                                                                                      | Cytosolic |
| P62424 | [60S ribosomal protein L7a (Surfeit locus protein 3) (PLA-X, polypeptide).]                                                                                                                                                                                     | Cytosolic |
| P62753 | 40S ribosomal protein S6 (Phosphoprotein NP33).                                                                                                                                                                                                                 | Cytosolic |
| P62826 | [GTP-binding nuclear protein Ran (GTPase Ran) (Ras-like protein TC4), (Androgen receptor-associated protein 24).]                                                                                                                                               | Cytosolic |
| P62841 | 40S ribosomal protein S15 (RIG protein).                                                                                                                                                                                                                        | Cytosolic |
| P62917 | 60S ribosomal protein L8.                                                                                                                                                                                                                                       | Cytosolic |
| P63104 | [14-3-3 protein zeta/delta (Protein kinase C inhibitor protein 1), (KCIP-1).]                                                                                                                                                                                   | Cytosolic |
| P68402 | [Platelet-activating factor acetylhydrolase IB subunit beta, (EC 3.1.1.47) (PAF acetylhydrolase 30 kDa subunit) (PAF-AH 30 kDa, subunit) (PAF-AH subunit beta) (PAFAH subunit beta).]                                                                           | Cytosolic |
| Q9C000 | [NACHT, LRR and PYD domains-containing protein 1 (Death effector, filament-forming ced-4-like apoptosis protein) (Nucleotide-binding, domain and caspase recruitment domain) (Caspase recruitment domain-, containing protein 7).]                              | Cytosolic |
| P98171 | [Rho GTPase-activating protein 4 (Rho-GAP hematopoietic protein C1), (p115).]                                                                                                                                                                                   | Cytosolic |
| Q01814 | [Plasma membrane calcium-transporting ATPase 2 (EC 3.6.3.8) (PMCA2), (Plasma membrane calcium pump isoform 2) (Plasma membrane calcium, ATPase isoform 2).]                                                                                                     | Cytosolic |
| Q04759 | Protein kinase C theta type (EC 2.7.11.13) (nPKC-theta).                                                                                                                                                                                                        | Cytosolic |
| Q05513 | Protein kinase C zeta type (EC 2.7.11.13) (nPKC-zeta).                                                                                                                                                                                                          | Cytosolic |
| Q05655 | Protein kinase C delta type (EC 2.7.11.13) (nPKC-delta).                                                                                                                                                                                                        | Cytosolic |
| Q07020 | 60S ribosomal protein L18.                                                                                                                                                                                                                                      | Cytosolic |
| Q07343 | [cAMP-specific 3',5'-cyclic phosphodiesterase 4B (EC 3.1.4.17) (DPDE4), (PDE32).]                                                                                                                                                                               | Cytosolic |
| Q08211 | [ATP-dependent RNA helicase A (EC 3.6.1.-) (Nuclear DNA helicase II), (NDH II) (DEAH box protein 9).]                                                                                                                                                           | Cytosolic |
| Q12888 | [Tumor suppressor p53-binding protein 1 (p53-binding protein 1), (p53BP1) (53BP1).]                                                                                                                                                                             | Cytosolic |
| Q13202 | [Dual specificity protein phosphatase 8 (EC 3.1.3.48) (EC 3.1.3.16), (Dual specificity protein phosphatase hVH-5).]                                                                                                                                             | Cytosolic |
| Q13287 | N-myc-interactor (Nmi) (N-myc and STAT interactor).                                                                                                                                                                                                             | Cytosolic |
| Q13322 | [Growth factor receptor-bound protein 10 (GRB10 adaptor protein), (Insulin receptor-binding protein GRB-IR).]                                                                                                                                                   | Cytosolic |
| Q92985 | Interferon regulatory factor 7 (IRF-7).                                                                                                                                                                                                                         | Cytosolic |
| Q92990 | [Glomulin (FKBP-associated protein) (FK506-binding protein-associated, protein) (FAP).]                                                                                                                                                                         | Cytosolic |
| Q9BQI3 | [Eukaryotic translation initiation factor 2-alpha kinase 1, (EC 2.7.11.1) (Heme-regulated eukaryotic initiation factor eIF-2-alpha, kinase) (Hemin-sensitive initiation factor 2-alpha kinase) (Heme-, regulated inhibitor) (Heme-controlled repressor) (HCR).] | Cytosolic |
| Q9BT40 | [Skeletal muscle and kidney-enriched inositol phosphatase, (EC 3.1.3.56).]                                                                                                                                                                                      | Cytosolic |
| Q9H0B6 | Kinesin light chain 2 (KLC 2).                                                                                                                                                                                                                                  | Cytosolic |
| Q9NQ74 | [Exosome complex exonuclease RRP46 (EC 3.1.13.-) (Ribosomal RNA-, processing protein 46) (Exosome component 5) (p12B) (Chronic, myelogenous leukemia tumor antigen 28).]                                                                                        | Cytosolic |
| Q9NR56 | Muscleblind-like protein 1 (Triplet-expansion RNA-binding protein).                                                                                                                                                                                             | Cytosolic |
| Q9NZN9 | Aryl-hydrocarbon-interacting protein-like 1.                                                                                                                                                                                                                    | Cytosolic |
| Q9ULA0 | Aspartyl aminopeptidase (EC 3.4.11.21).                                                                                                                                                                                                                         | Cytosolic |
| Q9UNH7 | Sorting nexin-6 (TRAF4-associated factor 2).                                                                                                                                                                                                                    | Cytosolic |

|        |                                                                                                                                                                                                                                                      |           |
|--------|------------------------------------------------------------------------------------------------------------------------------------------------------------------------------------------------------------------------------------------------------|-----------|
| Q9Y316 | [Protein MEMO1 (Mediator of ErbB2-driven cell motility 1) (Protein, memo) (C21orf19-like protein) (Hepatitis C virus NS5A-transactivated, protein 7) (HCV NS5A-transactivated protein 7).]                                                           | Cytosolic |
| O60568 | [Procollagen-lysine,2-oxoglutarate 5-dioxygenase 3 precursor, (EC 1.14.11.4) (Lysyl hydroxylase 3) (LH3).]                                                                                                                                           | ER        |
| P10632 | [Cytochrome P450 2C8 (EC 1.14.14.1) (CYP11C8) (P450 form 1) (P450 MP-, 12/MP-20) (P450 IIC2) (S-mephenytoin 4-hydroxylase).]                                                                                                                         | ER        |
| P13674 | [Prolyl 4-hydroxylase subunit alpha-1 precursor (EC 1.14.11.2) (4-PH, alpha-1) (Procollagen-proline,2-oxoglutarate-4-dioxygenase alpha-1, subunit).]                                                                                                 | ER        |
| P16435 | NADPH--cytochrome P450 reductase (EC 1.6.2.4) (CPR) (P450R).                                                                                                                                                                                         | ER        |
| P18850 | [Cyclic AMP-dependent transcription factor ATF-6 alpha (Activating, transcription factor 6 alpha) (ATF6-alpha) [Contains: Processed cyclic, AMP-dependent transcription factor ATF-6 alpha].]                                                        | ER        |
| P49257 | [Protein ERGIC-53 precursor (ER-Golgi intermediate compartment 53 kDa, protein) (Lectin mannose-binding 1) (Gp58) (Intracellular mannose-, specific lectin MR60).]                                                                                   | ER        |
| Q13724 | [Mannosyl-oligosaccharide glucosidase (EC 3.2.1.106) (Processing A-, glucosidase I).]                                                                                                                                                                | ER        |
| Q14703 | [Membrane-bound transcription factor site-1 protease precursor, (EC 3.4.21.112) (S1P endopeptidase) (Site-1 protease), (Subtilisin/kexin-isozyme 1) (SKI-1).]                                                                                        | ER        |
| O95169 | [NADH dehydrogenase [ubiquinone] 1 beta subcomplex subunit 8,, mitochondrial precursor (EC 1.6.5.3) (EC 1.6.99.3) (NADH-ubiquinone, oxidoreductase ASH1 subunit) (Complex I-ASH1) (CI-ASH1).]                                                        | ER        |
| P02654 | Apolipoprotein C-I precursor (Apo-CI) (ApoC-I).                                                                                                                                                                                                      | ER        |
| P04156 | [Major prion protein precursor (PrP) (PrP27-30) (PrP33-35C) (ASCR), (CD230 antigen).]                                                                                                                                                                | ER        |
| P30040 | Endoplasmic reticulum protein ERp29 precursor (ERp31) (ERp28).                                                                                                                                                                                       | ER        |
| P30101 | [Protein disulfide-isomerase A3 precursor (EC 5.3.4.1) (Disulfide, isomerase ER-60) (ERp60) (58 kDa microsomal protein) (p58) (ERp57) (58, kDa glucose-regulated protein).]                                                                          | ER        |
| P30989 | [Neurotensin receptor type 1 (NT-R-1) (High-affinity levocabastine-, insensitive neurotensin receptor) (NTRH).]                                                                                                                                      | ER        |
| P37108 | [Signal recognition particle 14 kDa protein (SRP14) (18 kDa Alu RNA-, binding protein).]                                                                                                                                                             | ER        |
| P37287 | [Phosphatidylinositol N-acetylglucosaminyltransferase subunit A, (EC 2.4.1.198) (GlcNAc-PI synthesis protein) (Phosphatidylinositol-, glycan biosynthesis class A protein) (PIG-A).]                                                                 | ER        |
| P38484 | [Interferon-gamma receptor beta chain precursor (Interferon-gamma, receptor accessory factor 1) (AF-1) (Interferon-gamma transducer 1).]                                                                                                             | ER        |
| Q93063 | [Exostosin-2 (EC 2.4.1.224) (EC 2.4.1.225) (Glucuronosyl-N-, acetylglucosaminyl-proteoglycan/N-acetylglucosaminyl-proteoglycan 4-, alpha-N-acetylglucosaminyltransferase) (Putative tumor suppressor, protein EXT2) (Multiple exostoses protein 2).] | ER        |
| Q99828 | [Calcium and integrin-binding protein 1 (Calmyrin) (DNA-PKcs-, interacting protein) (Kinase-interacting protein) (KIP) (CIB) (SNK-, interacting protein 2-28) (SIP2-28).]                                                                            | ER        |
| Q9UBR2 | Cathepsin Z precursor (EC 3.4.22.-) (Cathepsin X) (Cathepsin P).                                                                                                                                                                                     | ER        |
| O00469 | [Procollagen-lysine,2-oxoglutarate 5-dioxygenase 2 precursor, (EC 1.14.11.4) (Lysyl hydroxylase 2) (LH2).]                                                                                                                                           | ER        |
| O14967 | Calmegin precursor.                                                                                                                                                                                                                                  | ER        |
| O15533 | [Tapasin precursor (TPSN) (TPN) (TAP-binding protein) (TAP-associated, protein) (NGS-17).]                                                                                                                                                           | ER        |
| O43264 | Centromere/kinetochore protein zw10 homolog.                                                                                                                                                                                                         | ER        |
| O43896 | Kinesin-like protein KIF1C.                                                                                                                                                                                                                          | ER        |
| O60704 | [Protein-tyrosine sulfotransferase 2 (EC 2.8.2.20) (Tyrosylprotein, sulfotransferase-2) (TPST-2).]                                                                                                                                                   | ER        |
| P08842 | [Steryl-sulfatase precursor (EC 3.1.6.2) (Steroid sulfatase) (Steryl-, sulfate sulfohydrolase) (Arylsulfatase C) (ASC).]                                                                                                                             | ER        |
| P13667 | [Protein disulfide-isomerase A4 precursor (EC 5.3.4.1) (Protein ERp-72), (ERp72).]                                                                                                                                                                   | ER        |



|        |                                                                                                                                                                                                                                                                      |    |
|--------|----------------------------------------------------------------------------------------------------------------------------------------------------------------------------------------------------------------------------------------------------------------------|----|
| P16615 | [Sarcoplasmic/endoplasmic reticulum calcium ATPase 2 (EC 3.6.3.8), (Calcium pump 2) (SERCA2) (SR Ca(2+)-ATPase 2) (Calcium-transporting, ATPase sarcoplasmic reticulum type, slow twitch skeletal muscle, isoform) (Endoplasmic reticulum class 1/2 Ca(2+) ATPase).] | ER |
| P19086 | [Guanine nucleotide-binding protein G(z) subunit alpha (G(x) alpha, chain) (Gz-alpha).]                                                                                                                                                                              | ER |
| P49810 | [Presenilin-2 (EC 3.4.23.-) (PS-2) (STM-2) (E5-1) (AD3LP) (AD5), [Contains: Presenilin-2 NTF subunit; Presenilin-2 CTF subunit].]                                                                                                                                    | ER |
| P55210 | [Caspase-7 precursor (EC 3.4.22.60) (CASP-7) (ICE-like apoptotic, protease 3) (ICE-LAP3) (Apoptotic protease Mch-3) (CMH-1) [Contains: Caspase-7 subunit p20; Caspase-7 subunit p11].]                                                                               | ER |
| P55327 | Tumor protein D52 (Protein N8).                                                                                                                                                                                                                                      | ER |
| Q15006 | Tetratricopeptide repeat protein 35 (TPR repeat protein 35).                                                                                                                                                                                                         | ER |
| Q15084 | [Protein disulfide-isomerase A6 precursor (EC 5.3.4.1) (Protein, disulfide isomerase P5) (Thioredoxin domain-containing protein 7).]                                                                                                                                 | ER |
| Q15293 | Reticulocalbin-1 precursor.                                                                                                                                                                                                                                          | ER |
| Q8TAT6 | Nuclear protein localization protein 4 homolog (Protein NPL4).                                                                                                                                                                                                       | ER |
| P04035 | [3-hydroxy-3-methylglutaryl-coenzyme A reductase (EC 1.1.1.34) (HMG-CoA, reductase).]                                                                                                                                                                                | ER |
| P04114 | [Apolipoprotein B-100 precursor (Apo B-100) [Contains: Apolipoprotein, B-48 (Apo B-48)].]                                                                                                                                                                            | ER |
| P05093 | [Cytochrome P450 17A1 (EC 1.14.99.9) (CYPXVII) (P450-C17) (P450c17), (Steroid 17-alpha-monooxygenase) (Steroid 17-alpha-hydroxylase/17,20, lyase).]                                                                                                                  | ER |
| P22760 | Arylacetylamide deacetylase (EC 3.1.1.-) (AADAC).                                                                                                                                                                                                                    | ER |
| P23284 | [Peptidyl-prolyl cis-trans isomerase B precursor (EC 5.2.1.8) (PPIase), (Rotamase) (Cyclophilin B) (S-cyclophilin) (SCYLP) (CYP-S1).]                                                                                                                                | ER |
| P27824 | [Calnexin precursor (Major histocompatibility complex class I antigen-, binding protein p88) (p90) (IP90).]                                                                                                                                                          | ER |
| Q12770 | [Sterol regulatory element-binding protein cleavage-activating protein, (SREBP cleavage-activating protein) (SCAP).]                                                                                                                                                 | ER |
| Q12797 | [Aspartyl/asparaginyl beta-hydroxylase (EC 1.14.11.16) (Aspartate beta-, hydroxylase) (ASP beta-hydroxylase) (Peptide-aspartate beta-, dioxygenase).]                                                                                                                | ER |
| Q99541 | Adipophilin (Adipose differentiation-related protein) (ADRP).                                                                                                                                                                                                        | ER |
| Q9NQ3  | [Reticulon-4 (Neurite outgrowth inhibitor) (Nogo protein) (Foocen), (Neuroendocrine-specific protein) (NSP) (Neuroendocrine-specific, protein C homolog) (RTN-x) (Reticulon-5).]                                                                                     | ER |
| Q9NRZ7 | [1-acyl-sn-glycerol-3-phosphate acyltransferase gamma (EC 2.3.1.51) (1-, AGP acyltransferase 3) (1-AGPAT 3) (Lysophosphatidic acid, acyltransferase gamma) (LPAAT-gamma) (1-acylglycerol-3-phosphate O-, acyltransferase 3).]                                        | ER |
| Q9P2W9 | Syntaxin-18 (Cell growth-inhibiting gene 9 protein).                                                                                                                                                                                                                 | ER |
| Q9UNK0 | Syntaxin-8.                                                                                                                                                                                                                                                          | ER |
| O15118 | Niemann-Pick C1 protein precursor.                                                                                                                                                                                                                                   | ER |
| P08107 | Heat shock 70 kDa protein 1 (HSP70.1) (HSP70-1/HSP70-2).                                                                                                                                                                                                             | ER |
| P11511 | [Cytochrome P450 19A1 (EC 1.14.14.1) (Aromatase) (CYPXIX) (Estrogen, synthetase) (P-450AROM).]                                                                                                                                                                       | ER |
| P11712 | [Cytochrome P450 2C9 (EC 1.14.13.80) ((R)-limonene 6-monooxygenase), (EC 1.14.13.48) ((S)-limonene 6-monooxygenase) (EC 1.14.13.49) ((S)-, limonene 7-monooxygenase) (CYP11C9) (P450 PB-1) (P450 MP-4/MP-8) (S-, mephenytoin 4-hydroxylase) (P-450MP).]              | ER |
| P13637 | [Sodium/potassium-transporting ATPase subunit alpha-3 (EC 3.6.3.9), (Sodium pump subunit alpha-3) (Na(+)/K(+) ATPase alpha-3 subunit), (Na(+)/K(+) ATPase alpha(III) subunit).]                                                                                      | ER |
| P20774 | Mimecan precursor (Osteoglycin) (Osteoinductive factor) (OIF).                                                                                                                                                                                                       | ER |

|        |                                                                                                                                                                                                                                                                                    |               |
|--------|------------------------------------------------------------------------------------------------------------------------------------------------------------------------------------------------------------------------------------------------------------------------------------|---------------|
| P20813 | Cytochrome P450 2B6 (EC 1.14.14.1) (CYP11B6) (P450 I1B1).                                                                                                                                                                                                                          | ER            |
| P21246 | [Pleiotrophin precursor (PTN) (Heparin-binding growth-associated, molecule) (HB-GAM) (Heparin-binding growth factor 8) (HBGF-8), (Osteoblast-specific factor 1) (OSF-1) (Heparin-binding neurite, outgrowth-promoting factor 1) (HBNF-1) (Heparin-binding brain mitogen), (HBBM).] | ER            |
| P43155 | [Carnitine O-acetyltransferase (EC 2.3.1.7) (Carnitine acetylase) (CAT), (Carnitine acetyltransferase) (CrAT).]                                                                                                                                                                    | ER            |
| P43308 | [Translocon-associated protein subunit beta precursor (TRAP-beta), (Signal sequence receptor subunit beta) (SSR-beta).]                                                                                                                                                            | ER            |
| P46663 | B1 bradykinin receptor (BK-1 receptor) (B1R).                                                                                                                                                                                                                                      | ER            |
| P50454 | [Serpine H1 precursor (Collagen-binding protein) (Colligin) (47 kDa heat, shock protein) (Rheumatoid arthritis-related antigen RA-A47) (Arsenic-, transactivated protein 3) (AsTP3) (Cell proliferation-inducing gene 14, protein).]                                               | ER            |
| Q14554 | [Protein disulfide-isomerase A5 precursor (EC 5.3.4.1) (Protein, disulfide isomerase-related protein).]                                                                                                                                                                            | ER            |
| Q15397 | [Pumilio domain-containing protein KIAA0020 (HBV X-transactivated gene, 5 protein) (Minor histocompatibility antigen HA-8) (HLA-HA8).]                                                                                                                                             | ER            |
| Q15738 | [Sterol-4-alpha-carboxylate 3-dehydrogenase, decarboxylating, (EC 1.1.1.170) (Protein H105e3).]                                                                                                                                                                                    | ER            |
| Q16799 | Reticulon-1 (Neuroendocrine-specific protein).                                                                                                                                                                                                                                     | ER            |
| Q92535 | [Phosphatidylinositol N-acetylglucosaminyltransferase subunit C, (EC 2.4.1.198) (Phosphatidylinositol-glycan biosynthesis class C, protein) (PIG-C).]                                                                                                                              | ER            |
| P04275 | [von Willebrand factor precursor (vWF) [Contains: von Willebrand, antigen 2 (von Willebrand antigen II)].]                                                                                                                                                                         | ER            |
| P35610 | [Sterol O-acyltransferase 1 (EC 2.3.1.26) (Cholesterol acyltransferase, 1) (Acyl coenzyme A:cholesterol acyltransferase 1) (ACAT-1).]                                                                                                                                              | ER            |
| P37059 | [Estradiol 17-beta-dehydrogenase 2 (EC 1.1.1.62) (Testosterone 17-beta-, dehydrogenase) (EC 1.1.1.63) (17-beta-HSD 2) (Microsomal 17-beta-, hydroxysteroid dehydrogenase) (20 alpha-hydroxysteroid dehydrogenase), (20-alpha-HSD) (E2DH).]                                         | ER            |
| Q93084 | [Sarcoplasmic/endoplasmic reticulum calcium ATPase 3 (EC 3.6.3.8), (Calcium pump 3) (SERCA3) (SR Ca(2+)-ATPase 3).]                                                                                                                                                                | ER            |
| Q99943 | [1-acyl-sn-glycerol-3-phosphate acyltransferase alpha (EC 2.3.1.51) (1-, AGP acyltransferase 1) (1-AGPAT 1) (Lysophosphatidic acid, acyltransferase alpha) (LPAAT-alpha) (1-acylglycerol-3-phosphate O-, acyltransferase 1) (Protein G15).]                                        | ER            |
| Q9UHB9 | Signal recognition particle 68 kDa protein (SRP68).                                                                                                                                                                                                                                | ER            |
| Q9Y2B2 | [N-acetylglucosaminyl-phosphatidylinositol de-N-acetylase (EC 3.5.1.89), (Phosphatidylinositol-glycan biosynthesis class L protein) (PIG-L).]                                                                                                                                      | ER            |
| O15537 | Retinoschisin precursor (X-linked juvenile retinoschisis protein).                                                                                                                                                                                                                 | Extracellular |
| O43915 | [Vascular endothelial growth factor D precursor (VEGF-D) (c-fos-induced, growth factor) (FIGF).]                                                                                                                                                                                   | Extracellular |
| O75636 | [Ficolin-3 precursor (Collagen/fibrinogen domain-containing protein 3), (Collagen/fibrinogen domain-containing lectin 3 p35) (Hakata antigen).]                                                                                                                                    | Extracellular |
| O75882 | Attractin precursor (Mahogany homolog) (DPPT-L).                                                                                                                                                                                                                                   | Extracellular |
| P08254 | [Stromelysin-1 precursor (EC 3.4.24.17) (Matrix metalloproteinase-3), (MMP-3) (Transin-1) (SL-1).]                                                                                                                                                                                 | Extracellular |
| P08519 | Apolipoprotein(a) precursor (EC 3.4.21.-) (Apo(a)) (Lp(a)).                                                                                                                                                                                                                        | Extracellular |
| P09486 | [SPARC precursor (Secreted protein acidic and rich in cysteine), (Osteonectin) (ON) (Basement-membrane protein 40) (BM-40).]                                                                                                                                                       | Extracellular |
| P10451 | [Osteopontin precursor (Bone sialoprotein 1) (Secreted phosphoprotein, 1) (SPP-1) (Urinary stone protein) (Nephropontin) (Uropontin).]                                                                                                                                             | Extracellular |
| P11487 | [INT-2 proto-oncogene protein precursor (Fibroblast growth factor 3), (FGF-3) (HBGF-3).]                                                                                                                                                                                           | Extracellular |
| P12018 | [Immunoglobulin iota chain precursor (V(pre)B protein) (VpreB protein), (CD179a antigen).]                                                                                                                                                                                         | Extracellular |

|        |                                                                                                                                                                                                                                                                                                                                                                                           |               |
|--------|-------------------------------------------------------------------------------------------------------------------------------------------------------------------------------------------------------------------------------------------------------------------------------------------------------------------------------------------------------------------------------------------|---------------|
| P12259 | [Coagulation factor V precursor (Activated protein C cofactor), [Contains: Coagulation factor V heavy chain; Coagulation factor V, light chain].]                                                                                                                                                                                                                                         | Extracellular |
| P13521 | [Secretogranin-2 precursor (Secretogranin II) (SgII) (Chromogranin-C), [Contains: Secretoneurin (SN)].]                                                                                                                                                                                                                                                                                   | Extracellular |
| P13611 | [Versican core protein precursor (Large fibroblast proteoglycan), (Chondroitin sulfate proteoglycan core protein 2) (PG-M) (Glial, hyaluronate-binding protein) (GHAP).]                                                                                                                                                                                                                  | Extracellular |
| P13725 | Oncostatin-M precursor (OSM).                                                                                                                                                                                                                                                                                                                                                             | Extracellular |
| P14780 | [Matrix metalloproteinase-9 precursor (EC 3.4.24.35) (MMP-9) (92 kDa, type IV collagenase) (92 kDa gelatinase) (Gelatinase B) (GELB), [Contains: 67 kDa matrix metalloproteinase-9; 82 kDa matrix, metalloproteinase-9].]                                                                                                                                                                 | Extracellular |
| P15692 | [Vascular endothelial growth factor A precursor (VEGF-A) (Vascular, permeability factor) (VPF).]                                                                                                                                                                                                                                                                                          | Extracellular |
| P17948 | [Vascular endothelial growth factor receptor 1 precursor (EC 2.7.10.1), (VEGFR-1) (Vascular permeability factor receptor) (Tyrosine-protein, kinase receptor FLT) (Flt-1) (Tyrosine-protein kinase FRT) (Fms-like, tyrosine kinase 1).]                                                                                                                                                   | Extracellular |
| P18136 | Ig kappa chain V-III region HIC precursor.                                                                                                                                                                                                                                                                                                                                                | Extracellular |
| P18510 | [Interleukin-1 receptor antagonist protein precursor (IL-1ra) (IRAP), (IL1 inhibitor) (IL-1RN) (ICIL-1RA) (Anakinra).]                                                                                                                                                                                                                                                                    | Extracellular |
| P19883 | Follistatin precursor (FS) (Activin-binding protein).                                                                                                                                                                                                                                                                                                                                     | Extracellular |
| P49908 | Selenoprotein P precursor (SeP).                                                                                                                                                                                                                                                                                                                                                          | Extracellular |
| P54317 | Pancreatic lipase-related protein 2 precursor (EC 3.1.1.3).                                                                                                                                                                                                                                                                                                                               | Extracellular |
| P56703 | Proto-oncogene protein Wnt-3 precursor.                                                                                                                                                                                                                                                                                                                                                   | Extracellular |
| Q14116 | [Interleukin-18 precursor (IL-18) (Interferon-gamma-inducing factor), (IFN-gamma-inducing factor) (Interleukin-1 gamma) (IL-1 gamma), (Ibctadekin).]                                                                                                                                                                                                                                      | Extracellular |
| Q14624 | [Inter-alpha-trypsin inhibitor heavy chain H4 precursor (ITI heavy, chain H4) (Inter-alpha-inhibitor heavy chain 4) (Inter-alpha-trypsin, inhibitor family heavy chain-related protein) (IHRP) (Plasma, kallikrein sensitive glycoprotein 120) (PK-120) (GP120) [Contains: 70, kDa inter-alpha-trypsin inhibitor heavy chain H4; 35 kDa inter-alpha-, trypsin inhibitor heavy chain H4].] | Extracellular |
| Q15166 | Serum paraoxonase/lactonase 3 (EC 3.1.1.-).                                                                                                                                                                                                                                                                                                                                               | Extracellular |
| Q16610 | Extracellular matrix protein 1 precursor (Secretory component p85).                                                                                                                                                                                                                                                                                                                       | Extracellular |
| Q16674 | [Melanoma-derived growth regulatory protein precursor (Melanoma, inhibitory activity).]                                                                                                                                                                                                                                                                                                   | Extracellular |
| Q92824 | [Proprotein convertase subtilisin/kexin type 5 precursor (EC 3.4.21.-), (Proprotein convertase PC5) (Subtilisin/kexin-like protease PC5) (PC6), (hPC6).]                                                                                                                                                                                                                                  | Extracellular |
| O95158 | Neurexophilin-4 precursor.                                                                                                                                                                                                                                                                                                                                                                | Extracellular |
| P00738 | [Haptoglobin precursor [Contains: Haptoglobin alpha chain; Haptoglobin, beta chain].]                                                                                                                                                                                                                                                                                                     | Extracellular |
| P00742 | [Coagulation factor X precursor (EC 3.4.21.6) (Stuart factor) (Stuart-, Prower factor) [Contains: Factor X light chain; Factor X heavy chain;, Activated factor Xa heavy chain].]                                                                                                                                                                                                         | Extracellular |
| P00748 | [Coagulation factor XII precursor (EC 3.4.21.38) (Hageman factor) (HAF), [Contains: Coagulation factor XIIa heavy chain; Beta-factor XIIa part, 1; Beta-factor XIIa part 2; Coagulation factor XIIa light chain].]                                                                                                                                                                        | Extracellular |
| P00797 | Renin precursor (EC 3.4.23.15) (Angiotensinogenase).                                                                                                                                                                                                                                                                                                                                      | Extracellular |
| P01009 | [Alpha-1-antitrypsin precursor (Alpha-1 protease inhibitor) (Alpha-1-, antiproteinase).]                                                                                                                                                                                                                                                                                                  | Extracellular |
| P01023 | Alpha-2-macroglobulin precursor (Alpha-2-M).                                                                                                                                                                                                                                                                                                                                              | Extracellular |
| P01137 | [Transforming growth factor beta-1 precursor (TGF-beta-1) [Contains:, Latency-associated peptide (LAP)].]                                                                                                                                                                                                                                                                                 | Extracellular |
| P01567 | [Interferon alpha-7 precursor (Interferon alpha-J1) (IFN-alpha-J1), (Interferon alpha-J) (LeIF J).]                                                                                                                                                                                                                                                                                       | Extracellular |
| P01709 | Ig lambda chain V-II region MGC.                                                                                                                                                                                                                                                                                                                                                          | Extracellular |

|        |                                                                                                                                                                                                                                                                                                                                                                                                |               |
|--------|------------------------------------------------------------------------------------------------------------------------------------------------------------------------------------------------------------------------------------------------------------------------------------------------------------------------------------------------------------------------------------------------|---------------|
| P01769 | Ig heavy chain V-III region GA.                                                                                                                                                                                                                                                                                                                                                                | Extracellular |
| P01779 | Ig heavy chain V-III region TUR.                                                                                                                                                                                                                                                                                                                                                               | Extracellular |
| P02647 | [Apolipoprotein A-I precursor (Apo-AI) (ApoA-I) [Contains: Apolipoprotein A-I(1-242)].]                                                                                                                                                                                                                                                                                                        | Extracellular |
| P02747 | Complement C1q subcomponent subunit C precursor.                                                                                                                                                                                                                                                                                                                                               | Extracellular |
| P02750 | Leucine-rich alpha-2-glycoprotein precursor (LRG).                                                                                                                                                                                                                                                                                                                                             | Extracellular |
| P02760 | [AMBP protein precursor [Contains: Alpha-1-microglobulin (Protein HC), (Complex-forming glycoprotein heterogeneous in charge) (Alpha-1, microglycoprotein); Inter-alpha-trypsin inhibitor light chain (ITI-LC), (Bikunin) (HI-30)].]                                                                                                                                                           | Extracellular |
| P02766 | Transthyretin precursor (Prealbumin) (TBPA) (TTR) (ATTR).                                                                                                                                                                                                                                                                                                                                      | Extracellular |
| P02774 | [Vitamin D-binding protein precursor (DBP) (Group-specific component), (Gc-globulin) (VDB).]                                                                                                                                                                                                                                                                                                   | Extracellular |
| P03951 | [Coagulation factor XI precursor (EC 3.4.21.27) (Plasma thromboplastin, antecedent) (PTA) (FXI) [Contains: Coagulation factor XIa heavy chain, Coagulation factor XIa light chain].]                                                                                                                                                                                                           | Extracellular |
| P04004 | [Vitronectin precursor (Serum-spreading factor) (S-protein) (V75), [Contains: Vitronectin V65 subunit; Vitronectin V10 subunit, Somatomedin-B].]                                                                                                                                                                                                                                               | Extracellular |
| P04196 | [Histidine-rich glycoprotein precursor (Histidine-proline-rich, glycoprotein) (HPRG).]                                                                                                                                                                                                                                                                                                         | Extracellular |
| P04207 | Ig kappa chain V-III region CLL precursor (Rheumatoid factor).                                                                                                                                                                                                                                                                                                                                 | Extracellular |
| P04278 | [Sex hormone-binding globulin precursor (SHBG) (Sex steroid-binding, protein) (SBP) (Testis-specific androgen-binding protein) (ABP), (Testosterone-estrogen-binding globulin) (Testosterone-estradiol-, binding globulin) (TeBG).]                                                                                                                                                            | Extracellular |
| P05090 | Apolipoprotein D precursor (Apo-D) (ApoD).                                                                                                                                                                                                                                                                                                                                                     | Extracellular |
| P06280 | [Alpha-galactosidase A precursor (EC 3.2.1.22) (Melibiase) (Alpha-D-, galactoside galactohydrolase) (Alpha-D-galactosidase A) (Agalsidase, alfa).]                                                                                                                                                                                                                                             | Extracellular |
| P06314 | Ig kappa chain V-IV region B17 precursor.                                                                                                                                                                                                                                                                                                                                                      | Extracellular |
| P07093 | [Glia-derived nexin precursor (GDN) (Protease nexin I) (PN-1) (Protease, inhibitor 7).]                                                                                                                                                                                                                                                                                                        | Extracellular |
| P07225 | Vitamin K-dependent protein S precursor.                                                                                                                                                                                                                                                                                                                                                       | Extracellular |
| P07477 | [Trypsin-1 precursor (EC 3.4.21.4) (Trypsin I) (Cationic trypsinogen), (Serine protease 1).]                                                                                                                                                                                                                                                                                                   | Extracellular |
| P07602 | [Proactivator polypeptide precursor [Contains: Saposin-A (Protein A);, Saposin-B-Val; Saposin-B (Sphingolipid activator protein 1) (SAP-1), (Cerebroside sulfate activator) (CSAct) (Dispersin) (Sulfatide/GM1, activator); Saposin-C (Co-beta-glucosidase) (A1 activator), (Glucosylceramidase activator) (Sphingolipid activator protein 2), (SAP-2); Saposin-D (Protein C) (Component C)].] | Extracellular |
| P21810 | Biglycan precursor (Bone/cartilage proteoglycan I) (PG-S1).                                                                                                                                                                                                                                                                                                                                    | Extracellular |
| P22362 | [Small-inducible cytokine A1 precursor (CCL1) (T lymphocyte-secreted, protein I-309).]                                                                                                                                                                                                                                                                                                         | Extracellular |
| P22614 | Putative serum amyloid A-3 protein.                                                                                                                                                                                                                                                                                                                                                            | Extracellular |
| P24347 | [Stromelysin-3 precursor (EC 3.4.24.-) (ST3) (SL-3) (Matrix, metalloproteinase-11) (MMP-11).]                                                                                                                                                                                                                                                                                                  | Extracellular |
| P80421 | Ig heavy chain V-I region DOT.                                                                                                                                                                                                                                                                                                                                                                 | Extracellular |
| P80748 | Ig lambda chain V-III region LOI.                                                                                                                                                                                                                                                                                                                                                              | Extracellular |
| P35030 | [Trypsin-3 precursor (EC 3.4.21.4) (Trypsin III) (Brain trypsinogen), (Mesotrypsinogen) (Trypsin IV) (Serine protease 3) (Serine protease, 4).]                                                                                                                                                                                                                                                | Extracellular |
| Q9BZM1 | [Group XIIA secretory phospholipase A2 precursor (EC 3.1.1.4), (Phosphatidylcholine 2-acylhydrolase GXII) (GXII sPLA2).]                                                                                                                                                                                                                                                                       | Extracellular |
| P98095 | Fibulin-2 precursor.                                                                                                                                                                                                                                                                                                                                                                           | Extracellular |

|        |                                                                                                                                                                                                                                                                                                                                                                        |               |
|--------|------------------------------------------------------------------------------------------------------------------------------------------------------------------------------------------------------------------------------------------------------------------------------------------------------------------------------------------------------------------------|---------------|
| Q02297 | [Pro-neuregulin-1, membrane-bound isoform precursor (Pro-NRG1), [Contains: Neuregulin-1 (Neu differentiation factor) (Heregulin) (HRG), (Breast cancer cell differentiation factor p45) (Acetylcholine, receptor-inducing activity) (ARIA) (Sensory and motor neuron-derived, factor) (Glial growth factor)].]                                                         | Extracellular |
| Q02747 | [Guanylin precursor (Guanylate cyclase activator 2A) (Guanylate, cyclase-activating protein 1) (Gap-I) [Contains: HMW-guanylin;, Guanylin].]                                                                                                                                                                                                                           | Extracellular |
| Q02985 | [Complement factor H-related protein 3 precursor (FHR-3) (H factor-like, protein 3) (DOWN16).]                                                                                                                                                                                                                                                                         | Extracellular |
| Q03169 | [Tumor necrosis factor, alpha-induced protein 2 (Primary response gene, B94 protein).]                                                                                                                                                                                                                                                                                 | Extracellular |
| Q06828 | [Fibromodulin precursor (FM) (Collagen-binding 59 kDa protein) (Keratan, sulfate proteoglycan fibromodulin) (KSPG fibromodulin).]                                                                                                                                                                                                                                      | Extracellular |
| Q99435 | [Protein kinase C-binding protein NELL2 precursor (NEL-like protein 2), (Nel-related protein 2).]                                                                                                                                                                                                                                                                      | Extracellular |
| Q9H239 | [Matrix metalloproteinase-28 precursor (EC 3.4.24.-) (MMP-28), (Epilysin).]                                                                                                                                                                                                                                                                                            | Extracellular |
| Q9UBP4 | Dickkopf-related protein 3 precursor (Dkk-3) (Dickkopf-3) (hDkk-3).                                                                                                                                                                                                                                                                                                    | Extracellular |
| Q9UGM5 | Fetuin-B precursor (Gugu) (IRL685) (16G2).                                                                                                                                                                                                                                                                                                                             | Extracellular |
| Q9UKU9 | Angiopoietin-related protein 2 precursor (Angiopoietin-like 2).                                                                                                                                                                                                                                                                                                        | Extracellular |
| O14791 | [Apolipoprotein-L1 precursor (Apolipoprotein L-I) (Apolipoprotein L), (ApoL-I) (Apo-L) (ApoL).]                                                                                                                                                                                                                                                                        | Extracellular |
| O60258 | Fibroblast growth factor 17 precursor (FGF-17).                                                                                                                                                                                                                                                                                                                        | Extracellular |
| P08493 | [Matrix Gla protein precursor (MGP) (Cell growth-inhibiting gene 36, protein).]                                                                                                                                                                                                                                                                                        | Extracellular |
| P08603 | Complement factor H precursor (H factor 1).                                                                                                                                                                                                                                                                                                                            | Extracellular |
| P09038 | [Heparin-binding growth factor 2 precursor (HBGF-2) (Basic fibroblast, growth factor) (BFGF) (Prostatropin).]                                                                                                                                                                                                                                                          | Extracellular |
| P09238 | [Stromelysin-2 precursor (EC 3.4.24.22) (Matrix metalloproteinase-10), (MMP-10) (Transin-2) (SL-2).]                                                                                                                                                                                                                                                                   | Extracellular |
| P09341 | [Growth-regulated protein alpha precursor (CXCL1) (Melanoma growth, stimulatory activity) (MGSA) (Neutrophil-activating protein 3) (NAP-3), (GRO-alpha(1-73)) [Contains: GRO-alpha(4-73); GRO-alpha(5-73); GRO-, alpha(6-73)].]                                                                                                                                        | Extracellular |
| P09544 | Protein Wnt-2 precursor (IRP protein) (Int-1-related protein).                                                                                                                                                                                                                                                                                                         | Extracellular |
| P10153 | [Non-secretory ribonuclease precursor (EC 3.1.27.5) (Ribonuclease US), (Eosinophil-derived neurotoxin) (RNase Upl-2) (Ribonuclease 2) (RNase, 2).]                                                                                                                                                                                                                     | Extracellular |
| P10909 | [Clusterin precursor (Complement-associated protein SP-40,40), (Complement cytolysis inhibitor) (CLI) (NA1/NA2) (Apolipoprotein J), (Apo-J) (Testosterone-repressed prostate message 2) (TRPM-2), [Contains: Clusterin beta chain (ApoJalpha) (Complement cytolysis, inhibitor a chain); Clusterin alpha chain (ApoJbeta) (Complement, cytolysis inhibitor b chain)].] | Extracellular |
| P10915 | [Hyaluronan and proteoglycan link protein 1 precursor (Proteoglycan, link protein) (Cartilage link protein) (LP).]                                                                                                                                                                                                                                                     | Extracellular |
| P11226 | [Mannose-binding protein C precursor (MBP-C) (MBP1) (Mannan-binding, protein) (Mannose-binding lectin).]                                                                                                                                                                                                                                                               | Extracellular |
| P12034 | Fibroblast growth factor 5 precursor (FGF-5) (HBGF-5) (Smag-82).                                                                                                                                                                                                                                                                                                       | Extracellular |
| P12110 | Collagen alpha-2(VI) chain precursor.                                                                                                                                                                                                                                                                                                                                  | Extracellular |
| P13727 | [Bone marrow proteoglycan precursor (BMPG) (Proteoglycan 2) [Contains:, Eosinophil granule major basic protein (EMBP) (MBP) (Pregnancy-, associated major basic protein)].]                                                                                                                                                                                            | Extracellular |
| P14735 | [Insulin-degrading enzyme (EC 3.4.24.56) (Insulysin) (Insulinase), (Insulin protease).]                                                                                                                                                                                                                                                                                | Extracellular |
| P15169 | [Carboxypeptidase N catalytic chain precursor (EC 3.4.17.3) (CPN), (Carboxypeptidase N polypeptide 1) (Carboxypeptidase N small subunit), (Lysine carboxypeptidase) (Arginine carboxypeptidase) (Kininase-1), (Serum carboxypeptidase N) (SCPN) (Anaphylatoxin inactivator) (Plasma, carboxypeptidase B).]                                                             | Extracellular |

|        |                                                                                                                                                                                                                                                                                                                                                                                                                                                                                                                                                                                                                       |               |
|--------|-----------------------------------------------------------------------------------------------------------------------------------------------------------------------------------------------------------------------------------------------------------------------------------------------------------------------------------------------------------------------------------------------------------------------------------------------------------------------------------------------------------------------------------------------------------------------------------------------------------------------|---------------|
| P16442 | [Histo-blood group ABO system transferase (NAGAT) [Includes: Glycoprotein-fucosylgalactoside alpha-N-, acetylgalactosaminyltransferase (EC 2.4.1.40) (Fucosylglycoprotein, alpha-N-acetylgalactosaminyltransferase) (Histo-blood group A, transferase) (A transferase); Glycoprotein-fucosylgalactoside alpha-, galactosyltransferase (EC 2.4.1.37) (Fucosylglycoprotein 3-alpha-, galactosyltransferase) (Histo-blood group B transferase) (B, transferase)] [Contains: Fucosylglycoprotein alpha-N-, acetylgalactosaminyltransferase; Fucosylglycoprotein alpha-N-, acetylgalactosaminyltransferase soluble form].] | Extracellular |
| P17936 | [Insulin-like growth factor-binding protein 3 precursor (IGFBP-3) (IBP-, 3) (IGF-binding protein 3).]                                                                                                                                                                                                                                                                                                                                                                                                                                                                                                                 | Extracellular |
| P19823 | [Inter-alpha-trypsin inhibitor heavy chain H2 precursor (ITI heavy, chain H2) (Inter-alpha-inhibitor heavy chain 2) (Inter-alpha-trypsin, inhibitor complex component II) (Serum-derived hyaluronan-associated, protein) (SHAP).]                                                                                                                                                                                                                                                                                                                                                                                     | Extracellular |
| P20366 | [Protachykinin 1 precursor (PPT) [Contains: Substance P; Neurokinin A, (NKA) (Substance K) (Neuromedin L); Neuropeptide K (NPK); Neuropeptide, gamma; C-terminal-flanking peptide].]                                                                                                                                                                                                                                                                                                                                                                                                                                  | Extracellular |
| P20742 | Pregnancy zone protein precursor.                                                                                                                                                                                                                                                                                                                                                                                                                                                                                                                                                                                     | Extracellular |
| P56706 | Protein Wnt-7b precursor.                                                                                                                                                                                                                                                                                                                                                                                                                                                                                                                                                                                             | Extracellular |
| P56975 | [Pro-neuregulin-3, membrane-bound isoform precursor (Pro-NRG3), [Contains: Neuregulin-3 (NRG-3)].]                                                                                                                                                                                                                                                                                                                                                                                                                                                                                                                    | Extracellular |
| Q14563 | Semaphorin-3A precursor (Semaphorin III) (Sema III).                                                                                                                                                                                                                                                                                                                                                                                                                                                                                                                                                                  | Extracellular |
| Q15582 | [Transforming growth factor-beta-induced protein ig-h3 precursor (Beta, ig-h3) (Kerato-epithelin) (RGD-containing collagen-associated protein), (RGD-CAP).]                                                                                                                                                                                                                                                                                                                                                                                                                                                           | Extracellular |
| Q16619 | Cardiotrophin-1 (CT-1).                                                                                                                                                                                                                                                                                                                                                                                                                                                                                                                                                                                               | Extracellular |
| Q16651 | [Prostasin precursor (EC 3.4.21.-) (Serine protease 8) [Contains: Prostasin light chain; Prostasin heavy chain].]                                                                                                                                                                                                                                                                                                                                                                                                                                                                                                     | Extracellular |
| Q16819 | [Mepirin A subunit alpha precursor (EC 3.4.24.18) (Endopeptidase-2) (N-, benzoyl-L-tyrosyl-P-amino-benzoic acid hydrolase subunit alpha) (PABA, peptide hydrolase) (PPH alpha).]                                                                                                                                                                                                                                                                                                                                                                                                                                      | Extracellular |
| O76093 | Fibroblast growth factor 18 precursor (FGF-18) (zFGF5).                                                                                                                                                                                                                                                                                                                                                                                                                                                                                                                                                               | Extracellular |
| O95399 | Urotensin-2 precursor (Urotensin-II) (U-II) (UII).                                                                                                                                                                                                                                                                                                                                                                                                                                                                                                                                                                    | Extracellular |
| P00450 | Ceruloplasmin precursor (EC 1.16.3.1) (Ferroxidase).                                                                                                                                                                                                                                                                                                                                                                                                                                                                                                                                                                  | Extracellular |
| P00734 | [Prothrombin precursor (EC 3.4.21.5) (Coagulation factor II) [Contains: Activation peptide fragment 1; Activation peptide fragment 2; Thrombin, light chain; Thrombin heavy chain].]                                                                                                                                                                                                                                                                                                                                                                                                                                  | Extracellular |
| P01011 | [Alpha-1-antichymotrypsin precursor (ACT) (Cell growth-inhibiting gene, 24/25 protein) [Contains: Alpha-1-antichymotrypsin His-Pro-less].]                                                                                                                                                                                                                                                                                                                                                                                                                                                                            | Extracellular |
| P01042 | [Kininogen-1 precursor (Alpha-2-thiol proteinase inhibitor) [Contains: Kininogen-1 heavy chain; Bradykinin (Kallidin I); Lysyl-bradykinin, (Kallidin II); Kininogen-1 light chain; Low molecular weight growth-, promoting factor].]                                                                                                                                                                                                                                                                                                                                                                                  | Extracellular |
| P01266 | Thyroglobulin precursor.                                                                                                                                                                                                                                                                                                                                                                                                                                                                                                                                                                                              | Extracellular |
| P01574 | Interferon beta precursor (IFN-beta) (Fibroblast interferon).                                                                                                                                                                                                                                                                                                                                                                                                                                                                                                                                                         | Extracellular |
| P01591 | Immunoglobulin J chain.                                                                                                                                                                                                                                                                                                                                                                                                                                                                                                                                                                                               | Extracellular |
| P01624 | Ig kappa chain V-III region POM.                                                                                                                                                                                                                                                                                                                                                                                                                                                                                                                                                                                      | Extracellular |
| P01717 | Ig lambda chain V-IV region Hii.                                                                                                                                                                                                                                                                                                                                                                                                                                                                                                                                                                                      | Extracellular |
| P01771 | Ig heavy chain V-III region HIL.                                                                                                                                                                                                                                                                                                                                                                                                                                                                                                                                                                                      | Extracellular |
| P01814 | Ig heavy chain V-II region OU.                                                                                                                                                                                                                                                                                                                                                                                                                                                                                                                                                                                        | Extracellular |
| P02655 | Apolipoprotein C-II precursor (Apo-CII) (ApoC-II).                                                                                                                                                                                                                                                                                                                                                                                                                                                                                                                                                                    | Extracellular |

|        |                                                                                                                                                                                                                                                                         |               |
|--------|-------------------------------------------------------------------------------------------------------------------------------------------------------------------------------------------------------------------------------------------------------------------------|---------------|
| P02735 | [Serum amyloid A protein precursor (SAA) [Contains: Amyloid protein A, (Amyloid fibril protein AA); Serum amyloid protein A(2-104); Serum, amyloid protein A(3-104); Serum amyloid protein A(2-103); Serum, amyloid protein A(2-102); Serum amyloid protein A(4-101)].] | Extracellular |
| P02763 | Alpha-1-acid glycoprotein 1 precursor (AGP 1) (Orosomucoid-1) (OMD 1).                                                                                                                                                                                                  | Extracellular |
| P02768 | Serum albumin precursor.                                                                                                                                                                                                                                                | Extracellular |
| P02790 | Hemopexin precursor (Beta-1B-glycoprotein).                                                                                                                                                                                                                             | Extracellular |
| P04070 | [Vitamin K-dependent protein C precursor (EC 3.4.21.69), (Autoprothrombin IIA) (Anticoagulant protein C) (Blood coagulation, factor XIV) [Contains: Vitamin K-dependent protein C light chain;, Vitamin K-dependent protein C heavy chain; Activation peptide].]        | Extracellular |
| P04180 | [Phosphatidylcholine-sterol acyltransferase precursor (EC 2.3.1.43), (Lecithin-cholesterol acyltransferase) (Phospholipid-cholesterol, acyltransferase).]                                                                                                               | Extracellular |
| P04279 | [Semenogelin-1 precursor (Semenogelin I) (SGI) [Contains: Alpha-, inhibin-92; Alpha-inhibin-31; Seminal basic protein].]                                                                                                                                                | Extracellular |
| P04434 | Ig kappa chain V-III region VH precursor (Fragment).                                                                                                                                                                                                                    | Extracellular |
| P05112 | [Interleukin-4 precursor (IL-4) (B-cell stimulatory factor 1) (BSF-1), (Lymphocyte stimulatory factor 1) (Binetrakin) (Pitrakinra).]                                                                                                                                    | Extracellular |
| P05154 | [Plasma serine protease inhibitor precursor (PCI) (Protein C inhibitor), (Serpin A5) (Plasminogen activator inhibitor 3) (PAI-3) (PAI3), (Acrosomal serine protease inhibitor).]                                                                                        | Extracellular |
| P05160 | [Coagulation factor XIII B chain precursor (Protein-glutamine gamma-, glutamyltransferase B chain) (Transglutaminase B chain) (Fibrin-, stabilizing factor B subunit).]                                                                                                 | Extracellular |
| P05452 | [Tetranectin precursor (TN) (C-type lectin domain family 3 member B), (Plasminogen kringle 4-binding protein).]                                                                                                                                                         | Extracellular |
| P05543 | [Thyroxine-binding globulin precursor (T4-binding globulin) (Serpin, A7).]                                                                                                                                                                                              | Extracellular |
| P06309 | Ig kappa chain V-II region GM607 precursor (Fragment).                                                                                                                                                                                                                  | Extracellular |
| P06326 | Ig heavy chain V-I region Mot.                                                                                                                                                                                                                                          | Extracellular |
| P06727 | Apolipoprotein A-IV precursor (Apo-AIV) (ApoA-IV).                                                                                                                                                                                                                      | Extracellular |
| P07288 | [Prostate-specific antigen precursor (EC 3.4.21.77) (PSA) (Kallikrein-, 3) (Semenogelase) (Gamma-seminoprotein) (Seminin) (P-30 antigen).]                                                                                                                              | Extracellular |
| P07492 | [Gastrin-releasing peptide precursor (GRP) [Contains: Neuromedin-C, (GRP-10)].]                                                                                                                                                                                         | Extracellular |
| P22894 | [Neutrophil collagenase precursor (EC 3.4.24.34) (Matrix, metalloproteinase-8) (MMP-8) (PMNL collagenase) (PMNL-CL).]                                                                                                                                                   | Extracellular |
| P23142 | Fibulin-1 precursor.                                                                                                                                                                                                                                                    | Extracellular |
| P24001 | [Interleukin-32 precursor (IL-32) (Natural killer cells protein 4), (Tumor necrosis factor alpha-inducing factor).]                                                                                                                                                     | Extracellular |
| P80362 | Ig kappa chain V-I region WAT.                                                                                                                                                                                                                                          | Extracellular |
| P80697 | Synovial stimulatory protein p205 (Fragments).                                                                                                                                                                                                                          | Extracellular |
| P29460 | [Interleukin-12 subunit beta precursor (IL-12B) (IL-12 subunit p40), (Cytotoxic lymphocyte maturation factor 40 kDa subunit) (CLMF p40) (NK, cell stimulatory factor chain 2) (NKSF2).]                                                                                 | Extracellular |
| P31371 | [Glia-activating factor precursor (GAF) (Fibroblast growth factor 9), (FGF-9) (HBGF-9).]                                                                                                                                                                                | Extracellular |
| P35052 | Glypican-1 precursor.                                                                                                                                                                                                                                                   | Extracellular |
| P35858 | [Insulin-like growth factor-binding protein complex acid labile chain, precursor (ALS).]                                                                                                                                                                                | Extracellular |
| P36222 | [Chitinase-3-like protein 1 precursor (Cartilage glycoprotein 39) (GP-, 39) (39 kDa synovial protein) (HCgp-39) (YKL-40).]                                                                                                                                              | Extracellular |
| P36955 | [Pigment epithelium-derived factor precursor (PEDF) (Serpin-F1) (EPC-, 1).]                                                                                                                                                                                             | Extracellular |
| P41221 | Protein Wnt-5a precursor.                                                                                                                                                                                                                                               | Extracellular |
| Q01113 | Interleukin-9 receptor precursor (IL-9R) (CD129 antigen).                                                                                                                                                                                                               | Extracellular |

|        |                                                                                                                                                                                                                                               |               |
|--------|-----------------------------------------------------------------------------------------------------------------------------------------------------------------------------------------------------------------------------------------------|---------------|
| Q04756 | [Hepatocyte growth factor activator precursor (EC 3.4.21.-) (HGF, activator) (HGFA) [Contains: Hepatocyte growth factor activator short, chain; Hepatocyte growth factor activator long chain].]                                              | Extracellular |
| Q04762 | Very putative protein CMAR.                                                                                                                                                                                                                   | Extracellular |
| Q06033 | [Inter-alpha-trypsin inhibitor heavy chain H3 precursor (ITI heavy, chain H3) (Inter-alpha-inhibitor heavy chain 3) (Serum-derived, hyaluronan-associated protein) (SHAP).]                                                                   | Extracellular |
| Q07325 | [Small-inducible cytokine B9 precursor (CXCL9) (Gamma-interferon-, induced monokine) (MIG).]                                                                                                                                                  | Extracellular |
| Q13253 | Noggin precursor.                                                                                                                                                                                                                             | Extracellular |
| Q13316 | [Dentin matrix acidic phosphoprotein 1 precursor (Dentin matrix protein, 1) (DMP-1).]                                                                                                                                                         | Extracellular |
| Q99972 | [Myocilin precursor (Trabecular meshwork-induced glucocorticoid, response protein).]                                                                                                                                                          | Extracellular |
| Q9GZV9 | [Fibroblast growth factor 23 precursor (FGF-23) (Tumor-derived, hypophosphatemia-inducing factor).]                                                                                                                                           | Extracellular |
| O00339 | Matrilin-2 precursor.                                                                                                                                                                                                                         | Extracellular |
| O00548 | [Delta-like protein 1 precursor (Drosophila Delta homolog 1) (Delta1), (H-Delta-1).]                                                                                                                                                          | Extracellular |
| O15041 | Semaphorin-3E precursor.                                                                                                                                                                                                                      | Extracellular |
| O60235 | [Transmembrane protease, serine 11D precursor (EC 3.4.21.-) (Airway, trypsin-like protease) [Contains: Transmembrane protease, serine 11D, non-catalytic chain; Transmembrane protease, serine 11D catalytic, chain].]                        | Extracellular |
| P07996 | Thrombospondin-1 precursor.                                                                                                                                                                                                                   | Extracellular |
| P08253 | [72 kDa type IV collagenase precursor (EC 3.4.24.24) (72 kDa, gelatinase) (Matrix metalloproteinase-2) (MMP-2) (Gelatinase A) (TBE-, 1).]                                                                                                     | Extracellular |
| P08620 | [Fibroblast growth factor 4 precursor (FGF-4) (Heparin secretory-, transforming protein) (HST-1) (HST) (Transforming protein KS3) (HBGF-, 4).]                                                                                                | Extracellular |
| P08697 | [Alpha-2-antiplasmin precursor (Alpha-2-plasmin inhibitor) (Alpha-2-PI), (Alpha-2-AP).]                                                                                                                                                       | Extracellular |
| P08887 | [Interleukin-6 receptor alpha chain precursor (IL-6R-alpha) (IL-6R 1), (Membrane glycoprotein 80) (gp80) (CD126 antigen).]                                                                                                                    | Extracellular |
| P12724 | [Eosinophil cationic protein precursor (EC 3.1.27.-) (ECP), (Ribonuclease 3) (RNase 3).]                                                                                                                                                      | Extracellular |
| P15514 | [Amphiregulin precursor (AR) (Colorectum cell-derived growth factor), (CRDGF).]                                                                                                                                                               | Extracellular |
| P18428 | Lipopolysaccharide-binding protein precursor (LBP).                                                                                                                                                                                           | Extracellular |
| P19827 | [Inter-alpha-trypsin inhibitor heavy chain H1 precursor (ITI heavy, chain H1) (Inter-alpha-inhibitor heavy chain 1) (Inter-alpha-trypsin, inhibitor complex component III) (Serum-derived hyaluronan-associated, protein) (SHAP).]            | Extracellular |
| P20382 | [Pro-MCH precursor [Contains: Neuropeptide-glycine-glutamic acid (NGE), (Neuropeptide G-E); Neuropeptide-glutamic acid-isoleucine (NEI), (Neuropeptide E-I); Melanin-concentrating hormone (MCH)].]                                           | Extracellular |
| P43652 | Afamin precursor (Alpha-albumin) (Alpha-Alb).                                                                                                                                                                                                 | Extracellular |
| P45452 | [Collagenase 3 precursor (EC 3.4.24.-) (Matrix metalloproteinase-13), (MMP-13).]                                                                                                                                                              | Extracellular |
| P55058 | Phospholipid transfer protein precursor (Lipid transfer protein II).                                                                                                                                                                          | Extracellular |
| Q14129 | Protein DGCR6 (DiGeorge syndrome critical region 6).                                                                                                                                                                                          | Extracellular |
| Q15782 | [Chitinase-3-like protein 2 precursor (YKL-39) (Chondrocyte protein, 39).]                                                                                                                                                                    | Extracellular |
| Q8IZU9 | [Kin of IRRE-like protein 3 precursor (Kin of irregular chiasm-like, protein 3) (Nephrin-like 2).]                                                                                                                                            | Extracellular |
| Q92520 | Protein FAM3C precursor (Protein GS3786).                                                                                                                                                                                                     | Extracellular |
| P26022 | [Pentraxin-related protein PTX3 precursor (Pentraxin-related protein, PTX3) (Tumor necrosis factor-inducible protein TSG-14).]                                                                                                                | Extracellular |
| P00451 | [Coagulation factor VIII precursor (Procoagulant component), (Antihemophilic factor) (AHF) [Contains: Factor VIIIa heavy chain, 200, kDa isoform; Factor VIIIa heavy chain, 92 kDa isoform; Factor VIII B, chain; Factor VIIIa light chain].] | Extracellular |



|        |                                                                                                                                                                                                                                     |               |
|--------|-------------------------------------------------------------------------------------------------------------------------------------------------------------------------------------------------------------------------------------|---------------|
| P00736 | [Complement C1r subcomponent precursor (EC 3.4.21.41) (Complement, component 1, r subcomponent) [Contains: Complement C1r subcomponent, heavy chain; Complement C1r subcomponent light chain].]                                     | Extracellular |
| P00740 | [Coagulation factor IX precursor (EC 3.4.21.22) (Christmas factor), (Plasma thromboplastin component) (PTC) [Contains: Coagulation factor, IXa light chain; Coagulation factor IXa heavy chain].]                                   | Extracellular |
| P00747 | [Plasminogen precursor (EC 3.4.21.7) [Contains: Plasmin heavy chain A,; Activation peptide; Angiostatin; Plasmin heavy chain A, short form,; Plasmin light chain B].]                                                               | Extracellular |
| P01008 | Antithrombin-III precursor (ATIII).                                                                                                                                                                                                 | Extracellular |
| P01019 | [Angiotensinogen precursor (Serp1n A8) [Contains: Angiotensin-1, (Angiotensin I) (Ang I); Angiotensin-2 (Angiotensin II) (Ang II);, Angiotensin-3 (Angiotensin III) (Ang III) (Des-Asp[1]-angiotensin, II)].]                       | Extracellular |
| P01031 | [Complement C5 precursor [Contains: Complement C5 beta chain,; Complement C5 alpha chain; C5a anaphylatoxin; Complement C5 alpha', chain].]                                                                                         | Extracellular |
| P01270 | Parathyroid hormone precursor (Parathyrin) (PTH) (Parathormone).                                                                                                                                                                    | Extracellular |
| P01603 | Ig kappa chain V-I region Ka.                                                                                                                                                                                                       | Extracellular |
| P01625 | Ig kappa chain V-IV region Len.                                                                                                                                                                                                     | Extracellular |
| P01718 | Ig lambda chain V-IV region Kern.                                                                                                                                                                                                   | Extracellular |
| P01760 | Ig heavy chain V-I region WOL.                                                                                                                                                                                                      | Extracellular |
| P01777 | Ig heavy chain V-III region TEI.                                                                                                                                                                                                    | Extracellular |
| P01825 | Ig heavy chain V-II region NEWM.                                                                                                                                                                                                    | Extracellular |
| P02652 | [Apolipoprotein A-II precursor (ApoA-II) (ApoA-II) [Contains:, Apolipoprotein A-II(1-76)].]                                                                                                                                         | Extracellular |
| P02749 | [Beta-2-glycoprotein 1 precursor (Beta-2-glycoprotein I), (Apolipoprotein H) (Apo-H) (B2GPI) (Beta(2)GPI) (Activated protein C-, binding protein) (APC inhibitor) (Anticardiolipin cofactor).]                                      | Extracellular |
| P02753 | [Plasma retinol-binding protein precursor (PRBP) (RBP) [Contains:, Plasma retinol-binding protein(1-182); Plasma retinol-binding, protein(1-181); Plasma retinol-binding protein(1-179); Plasma retinol-, binding protein(1-176)].] | Extracellular |
| P02765 | [Alpha-2-HS-glycoprotein precursor (Fetuin-A) (Alpha-2-Z-globulin) (Ba-, alpha-2-glycoprotein) [Contains: Alpha-2-HS-glycoprotein chain A,; Alpha-2-HS-glycoprotein chain B].]                                                      | Extracellular |
| P04003 | [C4b-binding protein alpha chain precursor (C4bp) (Proline-rich, protein) (PRP).]                                                                                                                                                   | Extracellular |
| P04206 | Ig kappa chain V-III region GOL (Rheumatoid factor).                                                                                                                                                                                | Extracellular |
| P04217 | Alpha-1B-glycoprotein precursor (Alpha-1-B glycoprotein).                                                                                                                                                                           | Extracellular |
| P05155 | [Plasma protease C1 inhibitor precursor (C1 Inh) (C1Inh) (C1 esterase, inhibitor) (C1-inhibiting factor).]                                                                                                                          | Extracellular |
| P05305 | [Endothelin-1 precursor (Preproendothelin-1) (PPET1) [Contains:, Endothelin-1 (ET-1); Big endothelin-1].]                                                                                                                           | Extracellular |
| P05546 | [Heparin cofactor 2 precursor (Heparin cofactor II) (HC-II) (Protease, inhibitor leuserpin 2) (HLS2).]                                                                                                                              | Extracellular |
| P06276 | [Cholinesterase precursor (EC 3.1.1.8) (Acylcholine acylhydrolase), (Choline esterase II) (Butyrylcholine esterase), (Pseudocholinesterase).]                                                                                       | Extracellular |
| P06310 | Ig kappa chain V-II region RPMI 6410 precursor.                                                                                                                                                                                     | Extracellular |
| P06681 | [Complement C2 precursor (EC 3.4.21.43) (C3/C5 convertase) [Contains:, Complement C2b fragment; Complement C2a fragment].]                                                                                                          | Extracellular |
| P06858 | Lipoprotein lipase precursor (EC 3.1.1.34) (LPL).                                                                                                                                                                                   | Extracellular |
| P07357 | [Complement component C8 alpha chain precursor (Complement component 8, subunit alpha).]                                                                                                                                            | Extracellular |
| P21941 | Cartilage matrix protein precursor (Matrilin-1).                                                                                                                                                                                    | Extracellular |
| P22301 | [Interleukin-10 precursor (IL-10) (Cytokine synthesis inhibitory, factor) (CSIF).]                                                                                                                                                  | Extracellular |

|        |                                                                                                                                                                                                                                                                   |                        |
|--------|-------------------------------------------------------------------------------------------------------------------------------------------------------------------------------------------------------------------------------------------------------------------|------------------------|
| P22352 | [Glutathione peroxidase 3 precursor (EC 1.11.1.9) (GSHPx-3) (GPx-3), (Plasma glutathione peroxidase) (GSHPx-P) (Extracellular glutathione, peroxidase) (GPx-P).]                                                                                                  | Extracellular          |
| P22792 | [Carboxypeptidase N subunit 2 precursor (Carboxypeptidase N polypeptide, 2) (Carboxypeptidase N 83 kDa chain) (Carboxypeptidase N regulatory, subunit) (Carboxypeptidase N large subunit).]                                                                       | Extracellular          |
| P23352 | [Anosmin-1 precursor (Kallmann syndrome protein) (Adhesion molecule-, like X-linked).]                                                                                                                                                                            | Extracellular          |
| P24593 | [Insulin-like growth factor-binding protein 5 precursor (IGFBP-5) (IBP-, 5) (IGF-binding protein 5).]                                                                                                                                                             | Extracellular          |
| P25311 | [Zinc-alpha-2-glycoprotein precursor (Zn-alpha-2-glycoprotein) (Zn-, alpha-2-GP).]                                                                                                                                                                                | Extracellular          |
| P80370 | [Delta-like protein precursor (DLK) (pG2) [Contains: Fetal antigen 1, (FA1)].]                                                                                                                                                                                    | Extracellular          |
| P27169 | [Serum paraoxonase/arylesterase 1 (EC 3.1.1.2) (EC 3.1.8.1) (PON 1), (Serum aryldialkylphosphatase 1) (A-esterase 1) (Aromatic esterase 1), (K-45).]                                                                                                              | Extracellular          |
| P27918 | Properdin precursor (Complement factor P).                                                                                                                                                                                                                        | Extracellular          |
| P35556 | Fibrillin-2 precursor.                                                                                                                                                                                                                                            | Extracellular          |
| P41222 | [Prostaglandin-H2 D-isomerase precursor (EC 5.3.99.2) (Lipocalin-type, prostaglandin-D synthase) (Glutathione-independent PGD synthetase), (Prostaglandin-D2 synthase) (PGD2 synthase) (PGDS2) (PGDS) (Beta-trace, protein) (Cerebrin-28).]                       | Extracellular          |
| P81605 | [Dermcidin precursor (Preproteolysin) [Contains: Survival-promoting, peptide; DCD-1].]                                                                                                                                                                            | Extracellular          |
| Q02383 | Semenogelin-2 precursor (Semenogelin II) (SGII).                                                                                                                                                                                                                  | Extracellular          |
| Q13123 | Protein Red (Protein RER) (IK factor) (Cytokine IK).                                                                                                                                                                                                              | Extracellular          |
| Q93091 | Ribonuclease K6 precursor (EC 3.1.27.-) (RNase K6).                                                                                                                                                                                                               | Extracellular          |
| Q9NP55 | [Protein Plunc precursor (Palate lung and nasal epithelium clone, protein) (Lung-specific protein X) (Nasopharyngeal carcinoma-related, protein) (Tracheal epithelium-enriched protein) (Secretory protein in, upper respiratory tracts) (Von Ebner protein HI).] | Extracellular          |
| Q9NYY1 | Interleukin-20 precursor (IL-20) (Four alpha helix cytokine Zcyto10).                                                                                                                                                                                             | Extracellular          |
| Q9NZV5 | Selenoprotein N precursor.                                                                                                                                                                                                                                        | Extracellular          |
| Q9P2N4 | [ADAMTS-9 precursor (EC 3.4.24.-) (A disintegrin and metalloproteinase, with thrombospondin motifs 9) (ADAM-TS 9) (ADAM-TS9).]                                                                                                                                    | Extracellular          |
| Q9UBU2 | Dickkopf-related protein 2 precursor (Dkk-2) (Dickkopf-2) (hDkk-2).                                                                                                                                                                                               | Extracellular          |
| Q15835 | [Rhodopsin kinase precursor (EC 2.7.11.14) (RK) (G protein-coupled, receptor kinase 1).]                                                                                                                                                                          | Go Component not found |
| O00141 | [Serine/threonine-protein kinase Sgk1 (EC 2.7.11.1), (Serum/glucocorticoid-regulated kinase 1).]                                                                                                                                                                  | Go Component not found |
| O00167 | Eyes absent homolog 2 (EC 3.1.3.48).                                                                                                                                                                                                                              | Go Component not found |
| O00186 | [Syntaxin-binding protein 3 (Unc-18 homolog 3) (Unc-18C) (Unc-18-3), (Platelet Sec1 protein) (PSP).]                                                                                                                                                              | Go Component not found |
| O00194 | Ras-related protein Rab-27B (C25KG).                                                                                                                                                                                                                              | Go Component not found |
| O00321 | ETS translocation variant 2 (Ets-related protein 71).                                                                                                                                                                                                             | Go Component not found |
| O00330 | [Pyruvate dehydrogenase protein X component, mitochondrial precursor, (Dihydropyridine dehydrogenase-binding protein of pyruvate, dehydrogenase complex) (Lipoyl-containing pyruvate dehydrogenase, complex component X) (E3-binding protein) (E3BP) (proX).]     | Go Component not found |
| O00462 | [Beta-mannosidase precursor (EC 3.2.1.25) (Lysosomal beta A, mannosidase) (Mannanase) (Mannase).]                                                                                                                                                                 | Go Component not found |
| O00522 | [Krev interaction trapped protein 1 (Krev interaction trapped 1), (Cerebral cavernous malformations 1 protein).]                                                                                                                                                  | Go Component not found |
| O00716 | Transcription factor E2F3 (E2F-3).                                                                                                                                                                                                                                | Go Component not found |
| O00762 | [Ubiquitin-conjugating enzyme E2 C (EC 6.3.2.19) (Ubiquitin-protein, ligase C) (Ubiquitin carrier protein C) (UbcH10).]                                                                                                                                           | Go Component not found |

|        |                                                                                                                                                                                                                                                                                                                                                                                                                                                          |                        |
|--------|----------------------------------------------------------------------------------------------------------------------------------------------------------------------------------------------------------------------------------------------------------------------------------------------------------------------------------------------------------------------------------------------------------------------------------------------------------|------------------------|
| O14511 | [Pro-neuregulin-2, membrane-bound isoform precursor (Pro-NRG2), [Contains: Neuregulin-2 (NRG-2) (Neural- and thymus-derived activator, for ERBB kinases) (NTAK) (Divergent of neuregulin-1) (DON-1)].]                                                                                                                                                                                                                                                   | Go Component not found |
| O14548 | [Cytochrome c oxidase subunit VIIa-related protein, mitochondrial, precursor (COX7a-related protein) (EB1).]                                                                                                                                                                                                                                                                                                                                             | Go Component not found |
| O14607 | [Ubiquitously transcribed Y chromosome tetratricopeptide repeat protein, (Ubiquitously transcribed TPR protein on the Y chromosome).]                                                                                                                                                                                                                                                                                                                    | Go Component not found |
| O14627 | Homeobox protein CDX-4 (Caudal-type homeobox protein 4).                                                                                                                                                                                                                                                                                                                                                                                                 | Go Component not found |
| O14653 | [Golgi SNAP receptor complex member 2 (27 kDa Golgi SNARE protein), (Membrin).]                                                                                                                                                                                                                                                                                                                                                                          | Go Component not found |
| O14709 | [Zinc finger protein 197 (ZnF20) (Zinc finger protein with KRAB and, SCAN domains 9).]                                                                                                                                                                                                                                                                                                                                                                   | Go Component not found |
| O14771 | [Zinc finger protein 213 (Putative transcription factor CR53) (Zinc, finger protein with KRAB and SCAN domains 21).]                                                                                                                                                                                                                                                                                                                                     | Go Component not found |
| O14830 | [Serine/threonine-protein phosphatase with EF-hands 2 (EC 3.1.3.16), (PPEF-2).]                                                                                                                                                                                                                                                                                                                                                                          | Go Component not found |
| O14867 | [Transcription regulator protein BACH1 (BTB and CNC homolog 1), (HA2303).]                                                                                                                                                                                                                                                                                                                                                                               | Go Component not found |
| O14917 | Protocadherin-17 precursor (Protocadherin-68).                                                                                                                                                                                                                                                                                                                                                                                                           | Go Component not found |
| O14933 | [Ubiquitin/ISG15-conjugating enzyme E2 L6 (EC 6.3.2.19) (Ubiquitin-, protein ligase L6) (Ubiquitin carrier protein L6) (UbcH8) (Retinoic, acid-induced gene B protein) (RIG-B).]                                                                                                                                                                                                                                                                         | Go Component not found |
| O14966 | Ras-related protein Rab-7L1 (Rab-7-like protein 1).                                                                                                                                                                                                                                                                                                                                                                                                      | Go Component not found |
| O14978 | [Zinc finger protein 263 (Zinc finger protein FPM315) (Zinc finger, protein with KRAB and SCAN domains 12).]                                                                                                                                                                                                                                                                                                                                             | Go Component not found |
| O15027 | SEC16 homolog A.                                                                                                                                                                                                                                                                                                                                                                                                                                         | Go Component not found |
| O15049 | NEDD4-binding protein 3 (N4BP3).                                                                                                                                                                                                                                                                                                                                                                                                                         | Go Component not found |
| O15068 | [Guanine nucleotide exchange factor DBS (DBL's big sister) (MCF2-, transforming sequence-like protein).]                                                                                                                                                                                                                                                                                                                                                 | Go Component not found |
| O15084 | [Ankyrin repeat domain-containing protein 28 (Phosphatase interactor, targeting protein hnRNP K) (PITK).]                                                                                                                                                                                                                                                                                                                                                | Go Component not found |
| O15211 | [Ral guanine nucleotide dissociation stimulator-like 2 (RalGDS-like, factor) (RAS-associated protein RAB2L).]                                                                                                                                                                                                                                                                                                                                            | Go Component not found |
| O15234 | [Protein CASC3 (Cancer susceptibility candidate gene 3 protein), (Metastatic lymph node protein 51) (Protein MLN 51) (Protein barentsz), (Btz).]                                                                                                                                                                                                                                                                                                         | Go Component not found |
| O15270 | [Serine palmitoyltransferase 2 (EC 2.3.1.50) (Long chain base, biosynthesis protein 2) (LCB 2) (Serine-palmitoyl-CoA transferase 2), (SPT 2).]                                                                                                                                                                                                                                                                                                           | Go Component not found |
| O15305 | Phosphomannomutase 2 (EC 5.4.2.8) (PMM 2).                                                                                                                                                                                                                                                                                                                                                                                                               | Go Component not found |
| O15467 | [Small-inducible cytokine A16 precursor (CCL16) (IL-10-inducible, chemokine) (Chemokine LEC) (Liver-expressed chemokine) (Monotactin-1), (MTN-1) (Chemokine CC-4) (HCC-4) (NCC-4) (Lymphocyte and monocyte, chemoattractant) (LMC) (LCC-1).]                                                                                                                                                                                                             | Go Component not found |
| O15523 | [ATP-dependent RNA helicase DDX3Y (EC 3.6.1.-) (DEAD box protein 3, Y-, chromosomal).]                                                                                                                                                                                                                                                                                                                                                                   | Go Component not found |
| O43167 | [Zinc finger and BTB domain-containing protein 24 (Zinc finger protein, 450).]                                                                                                                                                                                                                                                                                                                                                                           | Go Component not found |
| O43252 | [Bifunctional 3'-phosphoadenosine 5'-phosphosulfate synthetase 1 (PAPS, synthetase 1) (PAPSS 1) (Sulfurylase kinase 1) (SK1) (SK 1) [Includes:, Sulfate adenylyltransferase (EC 2.7.7.4) (Sulfate adenylyltransferase) (SAT) (ATP-sulfurylase); Adenylyl-sulfate kinase, (EC 2.7.1.25) (Adenylylsulfate 3'-phosphotransferase) (APS kinase), (Adenosine-5'-phosphosulfate 3'-phosphotransferase) (3'-, phosphoadenosine-5'-phosphosulfate synthetase)].] | Go Component not found |
| O43310 | Uncharacterized protein KIAA0427.                                                                                                                                                                                                                                                                                                                                                                                                                        | Go Component not found |
| O43318 | [Mitogen-activated protein kinase kinase kinase 7 (EC 2.7.11.25), (Transforming growth factor-beta-activated kinase 1) (TGF-beta-, activated kinase 1).]                                                                                                                                                                                                                                                                                                 | Go Component not found |
| O43365 | Homeobox protein Hox-A3 (Hox-1E).                                                                                                                                                                                                                                                                                                                                                                                                                        | Go Component not found |

|        |                                                                                                                                                                                                                                       |                        |
|--------|---------------------------------------------------------------------------------------------------------------------------------------------------------------------------------------------------------------------------------------|------------------------|
| O43422 | [52 kDa repressor of the inhibitor of the protein kinase (p58IPK-, interacting protein) (58 kDa interferon-induced protein kinase-, interacting protein) (P52riPK) (Death-associated protein 4) (THAP, domain-containing protein 0).] | Go Component not found |
| O43506 | [ADAM 20 precursor (EC 3.4.24.-) (A disintegrin and metalloproteinase, domain 20).]                                                                                                                                                   | Go Component not found |
| O43572 | [A kinase anchor protein 10, mitochondrial precursor (Protein kinase A-, anchoring protein 10) (PRKA10) (Dual specificity A kinase-anchoring, protein 2) (D-AKAP-2).]                                                                 | Go Component not found |
| O43731 | [ER lumen protein retaining receptor 3 (KDEL receptor 3) (KDEL, endoplasmic reticulum protein retention receptor 3).]                                                                                                                 | Go Component not found |
| O43815 | Striatin.                                                                                                                                                                                                                             | Go Component not found |
| O60268 | Uncharacterized protein KIAA0513.                                                                                                                                                                                                     | Go Component not found |
| O60443 | [Non-syndromic hearing impairment protein 5 (Inversely correlated with, estrogen receptor expression 1) (ICERE-1).]                                                                                                                   | Go Component not found |
| O60488 | [Long-chain-fatty-acid-CoA ligase 4 (EC 6.2.1.3) (Long-chain acyl-CoA, synthetase 4) (LACS 4).]                                                                                                                                       | Go Component not found |
| O60610 | Protein diaphanous homolog 1 (Diaphanous-related formin-1) (DRF1).                                                                                                                                                                    | Go Component not found |
| O60674 | Tyrosine-protein kinase JAK2 (EC 2.7.10.2) (Janus kinase 2) (JAK-2).                                                                                                                                                                  | Go Component not found |
| O60701 | [UDP-glucose 6-dehydrogenase (EC 1.1.1.22) (UDP-Glc dehydrogenase), (UDP-GlcDH) (UDPGDH).]                                                                                                                                            | Go Component not found |
| O60809 | PRAME family member 10.                                                                                                                                                                                                               | Go Component not found |
| O60879 | Protein diaphanous homolog 2 (Diaphanous-related formin-2) (DRF2).                                                                                                                                                                    | Go Component not found |
| O60911 | Cathepsin L2 precursor (EC 3.4.22.43) (Cathepsin V) (Cathepsin U).                                                                                                                                                                    | Go Component not found |
| O75015 | [Low affinity immunoglobulin gamma Fc region receptor III-B precursor, (IgG Fc receptor III-1) (Fc-gamma RIII-beta) (Fc-gamma RIIIb), (FcRIIIb) (Fc-gamma RIII) (FcRIII) (FcR-10) (CD16b antigen).]                                   | Go Component not found |
| O75069 | Transmembrane and coiled-coil domains protein 2 (Cerebral protein 11).                                                                                                                                                                | Go Component not found |
| O75153 | Putative eukaryotic translation initiation factor 3 subunit (eIF-3).                                                                                                                                                                  | Go Component not found |
| O75293 | [Growth arrest and DNA-damage-inducible protein GADD45 beta (Negative, growth regulatory protein MyD118) (Myeloid differentiation primary, response protein MyD118).]                                                                 | Go Component not found |
| O75326 | [Semaphorin-7A precursor (Semaphorin L) (Sema L) (Semaphorin K1) (Sema, K1) (John-Milton-Hargen human blood group Ag) (JMH blood group, antigen) (CD108 antigen) (CDw108).]                                                           | Go Component not found |
| O75343 | Guanylate cyclase soluble subunit beta-2 (EC 4.6.1.2) (GCS-beta-2).                                                                                                                                                                   | Go Component not found |
| O75362 | Zinc finger protein 217.                                                                                                                                                                                                              | Go Component not found |
| O75414 | [Nucleoside diphosphate kinase 6 (EC 2.7.4.6) (NDK 6) (NDP kinase 6), (nm23-H6) (Inhibitor of p53-induced apoptosis-alpha) (IPIA-alpha).]                                                                                             | Go Component not found |
| O75461 | Transcription factor E2F6 (E2F-6).                                                                                                                                                                                                    | Go Component not found |
| O75534 | [Cold shock domain-containing protein E1 (UNR protein) (N-ras upstream, gene protein).]                                                                                                                                               | Go Component not found |
| O75610 | [Left-right determination factor 1 precursor (Protein lefty-1) (Left-, right determination factor B) (Protein lefty-B).]                                                                                                              | Go Component not found |
| O75665 | Oral-facial-digital syndrome 1 protein (Protein 71-7A).                                                                                                                                                                               | Go Component not found |
| O75694 | [Nuclear pore complex protein Nup155 (Nucleoporin Nup155) (155 kDa, nucleoporin).]                                                                                                                                                    | Go Component not found |
| O75747 | [Phosphatidylinositol-4-phosphate 3-kinase C2 domain-containing gamma, polypeptide (EC 2.7.1.154) (Phosphoinositide 3-Kinase-C2-gamma), (PtdIns-3-kinase C2 gamma) (PI3K-C2gamma).]                                                   | Go Component not found |
| O75840 | Krueppel-like factor 7 (Ubiquitous krueppel-like factor).                                                                                                                                                                             | Go Component not found |
| O75916 | Regulator of G-protein signaling 9 (RGS9).                                                                                                                                                                                            | Go Component not found |
| P07988 | [Pulmonary surfactant-associated protein B precursor (SP-B) (6 kDa, protein) (Pulmonary surfactant-associated proteolipid SPL(Phe)) (18, kDa pulmonary-surfactant protein).]                                                          | Go Component not found |

|        |                                                                                                                                                                                                                                         |                        |
|--------|-----------------------------------------------------------------------------------------------------------------------------------------------------------------------------------------------------------------------------------------|------------------------|
| P08048 | Zinc finger Y-chromosomal protein.                                                                                                                                                                                                      | Go Component not found |
| P08123 | Collagen alpha-2(I) chain precursor (Alpha-2 type I collagen).                                                                                                                                                                          | Go Component not found |
| P08185 | [Corticosteroid-binding globulin precursor (CBG) (Transcortin) (Serpine, A6).]                                                                                                                                                          | Go Component not found |
| P09210 | [Glutathione S-transferase A2 (EC 2.5.1.18) (GTH2) (HA subunit 2) (GST-, gamma) (GSTA2-2) (GST class-alpha member 2).]                                                                                                                  | Go Component not found |
| P09327 | Villin-1.                                                                                                                                                                                                                               | Go Component not found |
| P09543 | [2',3'-cyclic-nucleotide 3'-phosphodiesterase (EC 3.1.4.37) (CNP), (CNPase).]                                                                                                                                                           | Go Component not found |
| P09619 | [Beta-type platelet-derived growth factor receptor precursor, (EC 2.7.10.1) (PDGF-R-beta) (CD140b antigen).]                                                                                                                            | Go Component not found |
| P0C0L4 | [Complement C4-A precursor (Acidic complement C4) [Contains: Complement, C4 beta chain; Complement C4-A alpha chain; C4a anaphylatoxin; C4b-A <sub>2</sub> ; C4d-A; Complement C4 gamma chain].]                                        | Go Component not found |
| P10914 | Interferon regulatory factor 1 (IRF-1).                                                                                                                                                                                                 | Go Component not found |
| P11177 | [Pyruvate dehydrogenase E1 component subunit beta, mitochondrial, precursor (EC 1.2.4.1) (PDHE1-B).]                                                                                                                                    | Go Component not found |
| P11216 | Glycogen phosphorylase, brain form (EC 2.4.1.1).                                                                                                                                                                                        | Go Component not found |
| P11274 | [Breakpoint cluster region protein (EC 2.7.11.1) (Renal carcinoma, antigen NY-REN-26).]                                                                                                                                                 | Go Component not found |
| P11464 | [Pregnancy-specific beta-1-glycoprotein 1 precursor (PSBG-1), (Pregnancy-specific beta-1 glycoprotein C/D) (PS-beta-C/D) (Fetal, liver non-specific cross-reactive antigen 1/2) (FL-NCA-1/2) (PSG95), (CD66f antigen).]                 | Go Component not found |
| P11678 | [Eosinophil peroxidase precursor (EC 1.11.1.7) (EPO) [Contains: Eosinophil peroxidase light chain; Eosinophil peroxidase heavy chain].]                                                                                                 | Go Component not found |
| P12645 | Bone morphogenetic protein 3 precursor (BMP-3) (Osteogenin) (BMP-3A).                                                                                                                                                                   | Go Component not found |
| P12757 | Ski-like protein (Ski-related protein) (Ski-related oncogene).                                                                                                                                                                          | Go Component not found |
| P12931 | [Proto-oncogene tyrosine-protein kinase Src (EC 2.7.10.2) (p60-Src) (c-, Src) (pp60c-src).]                                                                                                                                             | Go Component not found |
| P13584 | Cytochrome P450 4B1 (EC 1.14.14.1) (CYP1B1) (P450-HP).                                                                                                                                                                                  | Go Component not found |
| P13639 | Elongation factor 2 (EF-2).                                                                                                                                                                                                             | Go Component not found |
| P13797 | Plastin-3 (T-plastin).                                                                                                                                                                                                                  | Go Component not found |
| P14619 | [cGMP-dependent protein kinase 1, beta isozyme (EC 2.7.11.12) (cGK 1, beta) (cGKI-beta).]                                                                                                                                               | Go Component not found |
| P15157 | Tryptase alpha-1 precursor (EC 3.4.21.59) (Tryptase-1).                                                                                                                                                                                 | Go Component not found |
| P15248 | [Interleukin-9 precursor (IL-9) (T-cell growth factor P40) (P40, cytokine).]                                                                                                                                                            | Go Component not found |
| P15586 | [N-acetylglucosamine-6-sulfatase precursor (EC 3.1.6.14) (G6S), (Glucosamine-6-sulfatase).]                                                                                                                                             | Go Component not found |
| P16035 | [Metalloproteinase inhibitor 2 precursor (TIMP-2) (Tissue inhibitor of, metalloproteinases 2) (CSC-21K).]                                                                                                                               | Go Component not found |
| P16152 | [Carbonyl reductase [NADPH] 1 (EC 1.1.1.184) (NADPH-dependent carbonyl, reductase 1) (Prostaglandin-E(2) 9-reductase) (EC 1.1.1.189), (Prostaglandin 9-ketoreductase) (15-hydroxyprostaglandin dehydrogenase, [NADP+]) (EC 1.1.1.197).] | Go Component not found |
| P16591 | [Proto-oncogene tyrosine-protein kinase FER (EC 2.7.10.2) (p94-FER) (c-, FER) (Tyrosine kinase 3).]                                                                                                                                     | Go Component not found |
| P17024 | Zinc finger protein 20 (Zinc finger protein KOX13).                                                                                                                                                                                     | Go Component not found |
| P17030 | Zinc finger protein 25 (Zinc finger protein KOX19).                                                                                                                                                                                     | Go Component not found |
| P17039 | Zinc finger protein 30 (Zinc finger protein KOX28).                                                                                                                                                                                     | Go Component not found |
| P17066 | Heat shock 70 kDa protein 6 (Heat shock 70 kDa protein B').                                                                                                                                                                             | Go Component not found |
| P17735 | [Tyrosine aminotransferase (EC 2.6.1.5) (L-tyrosine:2-oxoglutarate, aminotransferase) (TAT).]                                                                                                                                           | Go Component not found |
| P18084 | Integrin beta-5 precursor.                                                                                                                                                                                                              | Go Component not found |
| P18621 | 60S ribosomal protein L17 (L23).                                                                                                                                                                                                        | Go Component not found |

|        |                                                                                                                                                                                                                                                                                                                                                                                                                                                                                     |                        |
|--------|-------------------------------------------------------------------------------------------------------------------------------------------------------------------------------------------------------------------------------------------------------------------------------------------------------------------------------------------------------------------------------------------------------------------------------------------------------------------------------------|------------------------|
| P19022 | [Cadherin-2 precursor (Neural cadherin) (N-cadherin) (CD325 antigen), (CDw325).]                                                                                                                                                                                                                                                                                                                                                                                                    | Go Component not found |
| P19113 | Histidine decarboxylase (EC 4.1.1.22) (HDC).                                                                                                                                                                                                                                                                                                                                                                                                                                        | Go Component not found |
| P19320 | [Vascular cell adhesion protein 1 precursor (V-CAM 1) (CD106 antigen), (INCAM-100).]                                                                                                                                                                                                                                                                                                                                                                                                | Go Component not found |
| P19532 | Transcription factor E3.                                                                                                                                                                                                                                                                                                                                                                                                                                                            | Go Component not found |
| P20155 | [Serine protease inhibitor Kazal-type 2 precursor (Acrosin-trypsin, inhibitor) (HUSI-II).]                                                                                                                                                                                                                                                                                                                                                                                          | Go Component not found |
| P20290 | Transcription factor BTF3 (RNA polymerase B transcription factor 3).                                                                                                                                                                                                                                                                                                                                                                                                                | Go Component not found |
| P20333 | [Tumor necrosis factor receptor superfamily member 1B precursor (Tumor, necrosis factor receptor 2) (TNF-R2) (Tumor necrosis factor receptor, type II) (p75) (p80 TNF-alpha receptor) (CD120b antigen) (Etanercept), [Contains: Tumor necrosis factor receptor superfamily member 1b,, membrane form; Tumor necrosis factor-binding protein 2 (TBPII) (TBP-, 2)].]                                                                                                                  | Go Component not found |
| P20794 | [Serine/threonine-protein kinase MAK (EC 2.7.11.22) (Male germ cell-, associated kinase).]                                                                                                                                                                                                                                                                                                                                                                                          | Go Component not found |
| P20823 | [Hepatocyte nuclear factor 1-alpha (HNF-1A) (Liver-specific, transcription factor LF-B1) (LFB1) (Transcription factor 1) (TCF-1).]                                                                                                                                                                                                                                                                                                                                                  | Go Component not found |
| P21108 | [Ribose-phosphate pyrophosphokinase 3 (EC 2.7.6.1) (Phosphoribosyl, pyrophosphate synthetase III) (PRS-III) (Phosphoribosyl pyrophosphate, synthetase 1-like 1).]                                                                                                                                                                                                                                                                                                                   | Go Component not found |
| P21266 | [Glutathione S-transferase Mu 3 (EC 2.5.1.18) (GSTM3-3) (GST class-mu, 3) (hGSTM3-3).]                                                                                                                                                                                                                                                                                                                                                                                              | Go Component not found |
| P42336 | [Phosphatidylinositol-4,5-bisphosphate 3-kinase catalytic subunit alpha, isoform (EC 2.7.1.153) (PI3-kinase p110 subunit alpha) (PtdIns-3-, kinase p110) (PI3K).]                                                                                                                                                                                                                                                                                                                   | Go Component not found |
| P42681 | Tyrosine-protein kinase TXK (EC 2.7.10.2).                                                                                                                                                                                                                                                                                                                                                                                                                                          | Go Component not found |
| P42898 | Methylenetetrahydrofolate reductase (EC 1.5.1.20).                                                                                                                                                                                                                                                                                                                                                                                                                                  | Go Component not found |
| P43166 | [Carbonic anhydrase 7 (EC 4.2.1.1) (Carbonic anhydrase VII) (Carbonate, dehydratase VII) (CA-VII).]                                                                                                                                                                                                                                                                                                                                                                                 | Go Component not found |
| P43359 | [Melanoma-associated antigen 5 (MAGE-5 antigen) (Cancer/testis antigen, 1.5) (CT1.5).]                                                                                                                                                                                                                                                                                                                                                                                              | Go Component not found |
| P43365 | [Melanoma-associated antigen 12 (MAGE-12 antigen) (MAGE12F), (Cancer/testis antigen 1.12) (CT1.12).]                                                                                                                                                                                                                                                                                                                                                                                | Go Component not found |
| P45378 | [Troponin T, fast skeletal muscle (TnTf) (Fast skeletal muscle troponin, T) (fTnT) (Beta TnTF).]                                                                                                                                                                                                                                                                                                                                                                                    | Go Component not found |
| P45984 | [Mitogen-activated protein kinase 9 (EC 2.7.11.24) (Stress-activated, protein kinase JNK2) (c-Jun N-terminal kinase 2) (JNK-55).]                                                                                                                                                                                                                                                                                                                                                   | Go Component not found |
| P47897 | [Glutamyl-tRNA synthetase (EC 6.1.1.18) (Glutamine--tRNA ligase), (GlnRS).]                                                                                                                                                                                                                                                                                                                                                                                                         | Go Component not found |
| P48059 | [LIM and senescent cell antigen-like-containing domain protein 1, (Particularly interesting new Cys-His protein 1) (PINCH-1) (Renal, carcinoma antigen NY-REN-48).]                                                                                                                                                                                                                                                                                                                 | Go Component not found |
| P48443 | Retinoic acid receptor RXR-gamma (Retinoid X receptor gamma).                                                                                                                                                                                                                                                                                                                                                                                                                       | Go Component not found |
| P48595 | Serpin B10 (Bomapin) (Proteinase inhibitor 10).                                                                                                                                                                                                                                                                                                                                                                                                                                     | Go Component not found |
| P48643 | T-complex protein 1 subunit epsilon (TCP-1-epsilon) (CCT-epsilon).                                                                                                                                                                                                                                                                                                                                                                                                                  | Go Component not found |
| P48740 | [Complement-activating component of Ra-reactive factor precursor, (EC 3.4.21.-) (Ra-reactive factor serine protease p100) (RaRF), (Mannan-binding lectin serine protease 1) (Mannose-binding protein-, associated serine protease) (MASP-1) (Serine protease 5) [Contains:, Complement-activating component of Ra-reactive factor heavy chain;, Complement-activating component of Ra-reactive factor light chain].]                                                                | Go Component not found |
| P49327 | [Fatty acid synthase (EC 2.3.1.85) [Includes: [Acyl-carrier-protein] S-, acetyltransferase (EC 2.3.1.38); [Acyl-carrier-protein] S-, malonyltransferase (EC 2.3.1.39); 3-oxoacyl-[acyl-carrier-protein], synthase (EC 2.3.1.41); 3-oxoacyl-[acyl-carrier-protein] reductase, (EC 1.1.1.100); 3-hydroxypalmitoyl-[acyl-carrier-protein] dehydratase, (EC 4.2.1.61); Oleoyl-[acyl-carrier-protein] reductase (EC 1.3.1.10);, Oleoyl-[acyl-carrier-protein] hydrolase (EC 3.1.2.14)].] | Go Component not found |
| P49619 | [Diacylglycerol kinase gamma (EC 2.7.1.107) (Diglyceride kinase gamma), (DGK-gamma) (DAG kinase gamma).]                                                                                                                                                                                                                                                                                                                                                                            | Go Component not found |
| P49756 | [Probable RNA-binding protein 25 (RNA-binding motif protein 25) (RNA-, binding region-containing protein 7) (Protein S164).]                                                                                                                                                                                                                                                                                                                                                        | Go Component not found |

|        |                                                                                                                                                                                                                                                                                                                              |                        |
|--------|------------------------------------------------------------------------------------------------------------------------------------------------------------------------------------------------------------------------------------------------------------------------------------------------------------------------------|------------------------|
| P49759 | [Dual specificity protein kinase CLK1 (EC 2.7.12.1) (CDC-like kinase, 1).]                                                                                                                                                                                                                                                   | Go Component not found |
| P49767 | [Vascular endothelial growth factor C precursor (VEGF-C) (Vascular, endothelial growth factor-related protein) (VRP) (Flt4 ligand) (Flt4-, L).]                                                                                                                                                                              | Go Component not found |
| P49802 | Regulator of G-protein signaling 7 (RGS7).                                                                                                                                                                                                                                                                                   | Go Component not found |
| P49863 | [Granzyme K precursor (EC 3.4.21.-) (Granzyme-3) (NK-tryptase-2) (NK-, TRYP-2) (Fragmentin-3).]                                                                                                                                                                                                                              | Go Component not found |
| P49915 | [GMP synthase [glutamine-hydrolyzing] (EC 6.3.5.2) (Glutamine, amidotransferase) (GMP synthetase).]                                                                                                                                                                                                                          | Go Component not found |
| P50135 | Histamine N-methyltransferase (EC 2.1.1.8) (HMT).                                                                                                                                                                                                                                                                            | Go Component not found |
| P50458 | [LIM/homeobox protein Lhx2 (LIM homeobox protein 2) (Homeobox protein, LH-2).]                                                                                                                                                                                                                                               | Go Component not found |
| P50749 | Ras association domain-containing protein 2.                                                                                                                                                                                                                                                                                 | Go Component not found |
| P51160 | [Cone cGMP-specific 3',5'-cyclic phosphodiesterase subunit alpha', (EC 3.1.4.35) (cGMP phosphodiesterase 6C).]                                                                                                                                                                                                               | Go Component not found |
| P51172 | [Amiloride-sensitive sodium channel subunit delta (Epithelial Na(+), channel subunit delta) (Delta-ENaC) (Nonvoltage-gated sodium channel 1, subunit delta) (SCNED) (Delta-NaCH).]                                                                                                                                           | Go Component not found |
| P51452 | [Dual specificity protein phosphatase 3 (EC 3.1.3.48) (EC 3.1.3.16), (Dual specificity protein phosphatase VHR).]                                                                                                                                                                                                            | Go Component not found |
| P51513 | [RNA-binding protein Nova-1 (Neuro-oncological ventral antigen 1), (Onconeural ventral antigen 1) (Paraneoplastic Ri antigen) (Ventral, neuron-specific protein 1).]                                                                                                                                                         | Go Component not found |
| P51784 | [Ubiquitin carboxyl-terminal hydrolase 11 (EC 3.1.2.15) (Ubiquitin, thioesterase 11) (Ubiquitin-specific-processing protease 11), (Deubiquitinating enzyme 11).]                                                                                                                                                             | Go Component not found |
| P51812 | [Ribosomal protein S6 kinase alpha-3 (EC 2.7.11.1) (S6K-alpha 3) (90, kDa ribosomal protein S6 kinase 3) (p90-RSK 3) (Ribosomal S6 kinase 2), (RSK-2) (pp90RSK2) (Insulin-stimulated protein kinase 1) (ISPK-1) (MAP, kinase-activated protein kinase 1b) (MAPKAPK1B).]                                                      | Go Component not found |
| P51825 | [AF4/FMR2 family member 1 (Protein AF-4) (Proto-oncogene AF4) (Protein, FEL).]                                                                                                                                                                                                                                               | Go Component not found |
| P51957 | [Serine/threonine-protein kinase Nek4 (EC 2.7.11.1) (NimA-related, protein kinase 4) (Serine/threonine-protein kinase 2), (Serine/threonine-protein kinase NRK2).]                                                                                                                                                           | Go Component not found |
| P52209 | 6-phosphogluconate dehydrogenase, decarboxylating (EC 1.1.1.44).                                                                                                                                                                                                                                                             | Go Component not found |
| P52333 | [Tyrosine-protein kinase JAK3 (EC 2.7.10.2) (Janus kinase 3) (JAK-3), (Leukocyte janus kinase) (L-JAK).]                                                                                                                                                                                                                     | Go Component not found |
| P52630 | Signal transducer and activator of transcription 2 (p113).                                                                                                                                                                                                                                                                   | Go Component not found |
| P52735 | Protein vav-2.                                                                                                                                                                                                                                                                                                               | Go Component not found |
| P52757 | Beta-chimaerin (Beta-chimerin) (Rho GTPase-activating protein 3).                                                                                                                                                                                                                                                            | Go Component not found |
| P52823 | Stanniocalcin-1 precursor (STC-1).                                                                                                                                                                                                                                                                                           | Go Component not found |
| P52888 | Thimet oligopeptidase (EC 3.4.24.15) (Endopeptidase 24.15) (MP78).                                                                                                                                                                                                                                                           | Go Component not found |
| P52954 | Transcription factor LBX1 (Ladybird homeobox protein homolog 1).                                                                                                                                                                                                                                                             | Go Component not found |
| P53370 | [Nucleoside diphosphate-linked moiety X motif 6 (Nudix motif 6), (Protein GFG) (GFG-1) (Antisense basic fibroblast growth factor).]                                                                                                                                                                                          | Go Component not found |
| P53675 | Clathrin heavy chain 2 (CLH-22).                                                                                                                                                                                                                                                                                             | Go Component not found |
| P53779 | [Mitogen-activated protein kinase 10 (EC 2.7.11.24) (Stress-activated, protein kinase JNK3) (c-Jun N-terminal kinase 3) (MAP kinase p49, 3F12).]                                                                                                                                                                             | Go Component not found |
| P54646 | [5'-AMP-activated protein kinase catalytic subunit alpha-2, (EC 2.7.11.1) (AMPK alpha-2 chain).]                                                                                                                                                                                                                             | Go Component not found |
| P54886 | [Delta-1-pyrroline-5-carboxylate synthetase (P5CS) (Aldehyde, dehydrogenase family 18 member A1) [Includes: Glutamate 5-kinase, (EC 2.7.2.11) (Gamma-glutamyl kinase) (GK); Gamma-glutamyl phosphate, reductase (GPR) (EC 1.2.1.41) (Glutamate-5-semialdehyde dehydrogenase), (Glutamyl-gamma-semialdehyde dehydrogenase)].] | Go Component not found |

|        |                                                                                                                                                                                                                                                                                                                                                         |                        |
|--------|---------------------------------------------------------------------------------------------------------------------------------------------------------------------------------------------------------------------------------------------------------------------------------------------------------------------------------------------------------|------------------------|
| P55042 | GTP-binding protein RAD (RAS associated with diabetes) (RAD1).                                                                                                                                                                                                                                                                                          | Go Component not found |
| P55075 | [Fibroblast growth factor 8 precursor (FGF-8) (HBGF-8) (Androgen-, induced growth factor) (AIGF).]                                                                                                                                                                                                                                                      | Go Component not found |
| P55198 | Protein AF-17.                                                                                                                                                                                                                                                                                                                                          | Go Component not found |
| P55286 | Cadherin-8 precursor.                                                                                                                                                                                                                                                                                                                                   | Go Component not found |
| P55316 | [Forkhead box protein G1 (Forkhead box protein G1A) (Forkhead box, protein G1B) (Forkhead box protein G1C) (Forkhead-related protein, FKHL1) (HFK1) (Forkhead-related protein FKHL2) (HFK2) (Forkhead-, related protein FKHL3) (HFK3) (Transcription factor BF-1) (Brain, factor 1) (BF1) (Transcription factor BF-2) (Brain factor 2) (BF2), (hBF-2).] | Go Component not found |
| P55347 | [Homeobox protein PKNOX1 (PBX/knotted homeobox 1) (Homeobox protein, PREP-1).]                                                                                                                                                                                                                                                                          | Go Component not found |
| P56270 | [Myc-associated zinc finger protein (MAZI) (Purine-binding, transcription factor) (Pur-1) (ZF87) (ZIF87).]                                                                                                                                                                                                                                              | Go Component not found |
| P56645 | [Period circadian protein homolog 3 (Circadian clock protein PERIOD 3), (hPER3) (Cell growth-inhibiting gene 13 protein).]                                                                                                                                                                                                                              | Go Component not found |
| P56846 | T-cell leukemia/lymphoma protein 6 (Protein TNG1).                                                                                                                                                                                                                                                                                                      | Go Component not found |
| P56962 | Syntaxin-17 (KAT01814).                                                                                                                                                                                                                                                                                                                                 | Go Component not found |
| P57055 | Down syndrome critical region protein 6.                                                                                                                                                                                                                                                                                                                | Go Component not found |
| P57078 | [Receptor-interacting serine/threonine-protein kinase 4 (EC 2.7.11.1), (Ankyrin repeat domain-containing protein 3) (PKC-delta-interacting, protein kinase).]                                                                                                                                                                                           | Go Component not found |
| P57730 | Caspase-1 inhibitor Iceberg.                                                                                                                                                                                                                                                                                                                            | Go Component not found |
| Q13442 | [28 kDa heat- and acid-stable phosphoprotein (PDGF-associated protein), (PAP) (PDGFA-associated protein 1) (PAP1).]                                                                                                                                                                                                                                     | Go Component not found |
| Q13496 | Myotubularin (EC 3.1.3.48).                                                                                                                                                                                                                                                                                                                             | Go Component not found |
| Q13523 | [Serine/threonine-protein kinase PRP4 homolog (EC 2.7.11.1) (PRP4 pre-, mRNA-processing factor 4 homolog) (PRP4 kinase).]                                                                                                                                                                                                                               | Go Component not found |
| Q13555 | [Calcium/calmodulin-dependent protein kinase type II gamma chain, (EC 2.7.11.17) (CaM-kinase II gamma chain) (CaM kinase II subunit, gamma) (CaMK-II subunit gamma).]                                                                                                                                                                                   | Go Component not found |
| Q13616 | Cullin-1 (CUL-1).                                                                                                                                                                                                                                                                                                                                       | Go Component not found |
| Q13619 | Cullin-4A (CUL-4A).                                                                                                                                                                                                                                                                                                                                     | Go Component not found |
| Q13887 | [Krueppel-like factor 5 (Intestinal-enriched krueppel-like factor), (Colon krueppel-like factor) (Transcription factor BTEB2) (Basic, transcription element-binding protein 2) (BTE-binding protein 2) (GC-, box-binding protein 2).]                                                                                                                   | Go Component not found |
| Q14093 | Cylicin-2 (Cylicin II) (Multiple-band polypeptide II).                                                                                                                                                                                                                                                                                                  | Go Component not found |
| Q14137 | Ribosome biogenesis protein BOP1 (Block of proliferation 1 protein).                                                                                                                                                                                                                                                                                    | Go Component not found |
| Q14146 | Uncharacterized protein KIAA0133.                                                                                                                                                                                                                                                                                                                       | Go Component not found |
| Q14166 | Tubulin--tyrosine ligase-like protein 12.                                                                                                                                                                                                                                                                                                               | Go Component not found |
| Q14209 | Transcription factor E2F2 (E2F-2).                                                                                                                                                                                                                                                                                                                      | Go Component not found |
| Q14432 | [cGMP-inhibited 3',5'-cyclic phosphodiesterase A (EC 3.1.4.17) (Cyclic, GMP-inhibited phosphodiesterase A) (CGI-PDE A).]                                                                                                                                                                                                                                | Go Component not found |
| Q14457 | [Beclin-1 (Coiled-coil myosin-like BCL2-interacting protein) (Protein, GT197).]                                                                                                                                                                                                                                                                         | Go Component not found |
| Q14524 | [Sodium channel protein type 5 subunit alpha (Sodium channel protein, type V subunit alpha) (Voltage-gated sodium channel subunit alpha, Nav1.5) (Sodium channel protein cardiac muscle subunit alpha) (HH1).]                                                                                                                                          | Go Component not found |
| Q14576 | [ELAV-like protein 3 (Hu-antigen C) (HuC) (Paraneoplastic cerebellar, degeneration-associated antigen) (Paraneoplastic limbic encephalitis, antigen 21).]                                                                                                                                                                                               | Go Component not found |
| Q14585 | Zinc finger protein 345 (Zinc finger protein 10) (HZF10).                                                                                                                                                                                                                                                                                               | Go Component not found |
| Q14653 | Interferon regulatory factor 3 (IRF-3).                                                                                                                                                                                                                                                                                                                 | Go Component not found |



|        |                                                                                                                                                                                                                                                                    |                        |
|--------|--------------------------------------------------------------------------------------------------------------------------------------------------------------------------------------------------------------------------------------------------------------------|------------------------|
| Q14687 | Genetic suppressor element 1.                                                                                                                                                                                                                                      | Go Component not found |
| Q14749 | Glycine N-methyltransferase (EC 2.1.1.20).                                                                                                                                                                                                                         | Go Component not found |
| Q15027 | [Centaurin-beta 1 (Cnt-b1) (ARFGAP with coiled coil, ANK repeat and PH, domain-1) (ACAP1).]                                                                                                                                                                        | Go Component not found |
| Q15048 | Leucine-rich repeat-containing protein 14.                                                                                                                                                                                                                         | Go Component not found |
| Q15113 | [Procollagen C-endopeptidase enhancer 1 precursor (Procollagen COOH-, terminal proteinase enhancer 1) (Procollagen C-proteinase enhancer 1), (PCPE-1) (Type I procollagen COOH-terminal proteinase enhancer) (Type, 1 procollagen C-proteinase enhancer protein).] | Go Component not found |
| Q15119 | [[Pyruvate dehydrogenase [lipoamide]] kinase isozyme 2, mitochondrial, precursor (EC 2.7.11.2) (Pyruvate dehydrogenase kinase isoform 2).]                                                                                                                         | Go Component not found |
| Q15147 | [1-phosphatidylinositol-4,5-bisphosphate phosphodiesterase beta-4, (EC 3.1.4.11) (Phosphoinositide phospholipase C) (Phospholipase C-, beta-4) (PLC-beta-4).]                                                                                                      | Go Component not found |
| Q15329 | Transcription factor E2F5 (E2F-5).                                                                                                                                                                                                                                 | Go Component not found |
| Q15431 | [Synaptonemal complex protein 1 (SCP-1) (Cancer/testis antigen 8), (CT8).]                                                                                                                                                                                         | Go Component not found |
| Q15485 | [Ficolin-2 precursor (Ficolin-B) (Ficolin-beta) (L-ficolin), (Collagen/fibrinogen domain-containing protein 2) (Serum lectin p35), (EBP-37) (Hucolin).]                                                                                                            | Go Component not found |
| Q15527 | Surfeit locus protein 2 (Surf-2).                                                                                                                                                                                                                                  | Go Component not found |
| Q15569 | [Dual specificity testis-specific protein kinase 1 (EC 2.7.12.1), (Testicular protein kinase 1).]                                                                                                                                                                  | Go Component not found |
| Q15699 | Cartilage homeoprotein 1 (CART-1).                                                                                                                                                                                                                                 | Go Component not found |
| Q15717 | ELAV-like protein 1 (Hu-antigen R) (HuR).                                                                                                                                                                                                                          | Go Component not found |
| Q15742 | [NGFI-A-binding protein 2 (EGR-1-binding protein 2) (Melanoma-, associated delayed early response protein) (Protein MADER).]                                                                                                                                       | Go Component not found |
| Q15750 | [Mitogen-activated protein kinase kinase kinase 7-interacting protein 1, (TGF-beta-activated kinase 1-binding protein 1) (TAK1-binding protein, 1).]                                                                                                               | Go Component not found |
| Q15773 | Myeloid leukemia factor 2 (Myelodysplasia-myeloid leukemia factor 2).                                                                                                                                                                                              | Go Component not found |
| Q15784 | [Neurogenic differentiation factor 2 (NeuroD2) (NeuroD-related factor), (NDRF).]                                                                                                                                                                                   | Go Component not found |
| Q16281 | [Cyclic nucleotide-gated cation channel alpha 3 (CNG channel alpha 3), (CNG-3) (CNG3) (Cyclic nucleotide-gated channel alpha 3) (Cone, photoreceptor cGMP-gated channel subunit alpha).]                                                                           | Go Component not found |
| Q16517 | Neuronatin.                                                                                                                                                                                                                                                        | Go Component not found |
| Q16566 | [Calcium/calmodulin-dependent protein kinase type IV (EC 2.7.11.17), (CAM kinase-GR) (CaMK IV).]                                                                                                                                                                   | Go Component not found |
| Q16626 | Male-enhanced antigen 1 (MEA-1).                                                                                                                                                                                                                                   | Go Component not found |
| Q16650 | T-brain-1 protein (T-box brain protein 1) (TBR-1) (TES-56).                                                                                                                                                                                                        | Go Component not found |
| Q16696 | Cytochrome P450 2A13 (EC 1.14.14.1) (CYP11A13).                                                                                                                                                                                                                    | Go Component not found |
| Q16816 | [Phosphorylase b kinase gamma catalytic chain, skeletal muscle isoform, (EC 2.7.11.19) (Phosphorylase kinase subunit gamma 1).]                                                                                                                                    | Go Component not found |
| Q53GD3 | [Choline transporter-like protein 4 (Solute carrier family 44 member, 4).]                                                                                                                                                                                         | Go Component not found |
| Q86UA6 | RPA-interacting protein (hRIP).                                                                                                                                                                                                                                    | Go Component not found |
| Q8IUE1 | [Homeobox protein TGIF2LX (TGFB-induced factor 2-like protein, X-, linked) (TGF(beta)induced transcription factor 2-like protein) (TGIF-, like on the X).]                                                                                                         | Go Component not found |
| Q8N6M3 | Uncharacterized protein C20orf142 precursor.                                                                                                                                                                                                                       | Go Component not found |
| Q8WUD1 | Ras-related protein Rab-2B.                                                                                                                                                                                                                                        | Go Component not found |
| Q92186 | [Alpha-2,8-sialyltransferase 8B (EC 2.4.99.-) (ST8Sia II), (Sialyltransferase X) (STX).]                                                                                                                                                                           | Go Component not found |

|        |                                                                                                                                                                                                                                                          |                        |
|--------|----------------------------------------------------------------------------------------------------------------------------------------------------------------------------------------------------------------------------------------------------------|------------------------|
| Q92499 | [ATP-dependent RNA helicase DDX1 (EC 3.6.1.-) (DEAD box protein 1), (DEAD box protein retinoblastoma) (DBP-RB).]                                                                                                                                         | Go Component not found |
| Q92537 | Uncharacterized protein KIAA0247 precursor.                                                                                                                                                                                                              | Go Component not found |
| Q92545 | Transmembrane protein 131 (Protein RW1).                                                                                                                                                                                                                 | Go Component not found |
| Q92562 | SAC domain-containing protein 3 (FIG4 homolog).                                                                                                                                                                                                          | Go Component not found |
| Q92617 | Uncharacterized protein KIAA0220.                                                                                                                                                                                                                        | Go Component not found |
| Q92622 | Uncharacterized protein KIAA0226.                                                                                                                                                                                                                        | Go Component not found |
| Q92777 | Synapsin-2 (Synapsin II).                                                                                                                                                                                                                                | Go Component not found |
| Q92785 | [Zinc finger protein ubi-d4 (Requiem) (Apoptosis response zinc finger, protein) (D4, zinc and double PHD fingers family 2).]                                                                                                                             | Go Component not found |
| Q92804 | [TATA-binding protein-associated factor 2N (RNA-binding protein 56), (TAFII68) (TAF(II)68).]                                                                                                                                                             | Go Component not found |
| Q92832 | [Protein kinase C-binding protein NELL1 precursor (NEL-like protein 1), (Nel-related protein 1).]                                                                                                                                                        | Go Component not found |
| Q92844 | [TRAF family member-associated NF-kappa-B activator (TRAF-interacting, protein) (I-TRAF).]                                                                                                                                                               | Go Component not found |
| Q92903 | [Phosphatidate cytidyltransferase 1 (EC 2.7.7.41) (CDP-diglyceride, synthetase 1) (CDP-diglyceride pyrophosphorylase 1) (CDP-, diacylglycerol synthase 1) (CDS 1) (CTP:phosphatidate, cytidyltransferase 1) (CDP-DAG synthase 1) (CDP-DG synthetase 1).] | Go Component not found |
| Q92930 | Ras-related protein Rab-8B.                                                                                                                                                                                                                              | Go Component not found |
| Q92935 | [Exostosin-like 1 (EC 2.4.1.224) (Glucuronosyl-N-acetylglucosaminyl-, proteoglycan 4-alpha-N-acetylglucosaminyltransferase) (Exostosin-L), (Multiple exostosin-like protein).]                                                                           | Go Component not found |
| O76061 | [Stanniocalcin-2 precursor (STC-2) (Stanniocalcin-related protein), (STCRP) (STC-related protein).]                                                                                                                                                      | Go Component not found |
| O94804 | [Serine/threonine-protein kinase 10 (EC 2.7.11.1) (Lymphocyte-oriented, kinase).]                                                                                                                                                                        | Go Component not found |
| O94819 | [Kelch repeat and BTB domain-containing protein 11 (Kelch domain-, containing protein 7B).]                                                                                                                                                              | Go Component not found |
| O94966 | [Ubiquitin carboxyl-terminal hydrolase 19 (EC 3.1.2.15) (Ubiquitin, thioesterase 19) (Ubiquitin-specific-processing protease 19), (Deubiquitinating enzyme 19) (Zinc finger MYND domain-containing, protein 9).]                                         | Go Component not found |
| O94991 | [SLIT and NTRK-like protein 5 precursor (Leucine-rich repeat-containing, protein 11).]                                                                                                                                                                   | Go Component not found |
| O95013 | Olfactory receptor 4F3.                                                                                                                                                                                                                                  | Go Component not found |
| O95050 | [Indolethylamine N-methyltransferase (EC 2.1.1.49) (Aromatic alkylamine, N-methyltransferase) (Indolamine N-methyltransferase) (Arylamine N-, methyltransferase) (Amine N-methyltransferase).]                                                           | Go Component not found |
| O95236 | [Apolipoprotein-L3 (Apolipoprotein L-III) (ApoL-III) (TNF-inducible, protein CG12-1) (CG12_1).]                                                                                                                                                          | Go Component not found |
| O95249 | [Golgi SNAP receptor complex member 1 (28 kDa Golgi SNARE protein) (28, kDa cis-Golgi SNARE p28) (GOS-28).]                                                                                                                                              | Go Component not found |
| O95336 | 6-phosphogluconolactonase (EC 3.1.1.31) (6PGL).                                                                                                                                                                                                          | Go Component not found |
| O95382 | [Mitogen-activated protein kinase kinase kinase 6 (EC 2.7.11.25), (Apoptosis signal-regulating kinase 2).]                                                                                                                                               | Go Component not found |
| O95394 | [Phosphoacetylglucosamine mutase (EC 5.4.2.3) (PAGM) (Acetylglucosamine, phosphomutase) (N-acetylglucosamine-phosphate mutase), (Phosphoglucomutase 3).]                                                                                                 | Go Component not found |
| O95409 | Zinc finger protein ZIC 2 (Zinc finger protein of the cerebellum 2).                                                                                                                                                                                     | Go Component not found |
| O95447 | Uncharacterized protein C21orf13.                                                                                                                                                                                                                        | Go Component not found |
| O95613 | Pericentrin (Pericentrin B) (Kendrin).                                                                                                                                                                                                                   | Go Component not found |
| O95661 | [GTP-binding protein Di-Ras3 (Distinct subgroup of the Ras family, member 3) (Rho-related GTP-binding protein Rhol).]                                                                                                                                    | Go Component not found |
| O95718 | [Steroid hormone receptor ERR2 (Estrogen-related receptor, beta) (ERR-, beta) (Estrogen receptor-like 2) (ERR beta-2).]                                                                                                                                  | Go Component not found |
| O95816 | [BAG family molecular chaperone regulator 2 (Bcl-2-associated, athanogene 2) (BAG-2).]                                                                                                                                                                   | Go Component not found |
| O95863 | Zinc finger protein SNAI1 (Protein snail homolog) (Protein sna).                                                                                                                                                                                         | Go Component not found |

|        |                                                                                                                                                                                                              |                        |
|--------|--------------------------------------------------------------------------------------------------------------------------------------------------------------------------------------------------------------|------------------------|
| O95905 | SGT1 protein (hSGT1) (Ecdysoneless homolog) (Suppressor of GCR2).                                                                                                                                            | Go Component not found |
| O95947 | T-box transcription factor TBX6 (T-box protein 6).                                                                                                                                                           | Go Component not found |
| P25685 | [DnaJ homolog subfamily B member 1 (Heat shock 40 kDa protein 1) (Heat, shock protein 40) (HSP40) (DnaJ protein homolog 1) (HDJ-1).]                                                                         | Go Component not found |
| P00167 | Cytochrome b5.                                                                                                                                                                                               | Go Component not found |
| P00374 | Dihydrofolate reductase (EC 1.5.1.3).                                                                                                                                                                        | Go Component not found |
| P00568 | [Adenylate kinase isoenzyme 1 (EC 2.7.4.3) (ATP-AMP transphosphorylase), (AK1) (Myokinase).]                                                                                                                 | Go Component not found |
| P01034 | [Cystatin-C precursor (Cystatin-3) (Neuroendocrine basic polypeptide), (Gamma-trace) (Post-gamma-globulin).]                                                                                                 | Go Component not found |
| P01210 | [Proenkephalin A precursor [Contains: Synenkephalin; Met-enkephalin, (Opioid growth factor) (OGF); Met-enkephalin-Arg-Gly-Leu; Leu-, enkephalin; Met-enkephalin-Arg-Phe].]                                   | Go Component not found |
| P01282 | [VIP peptides precursor [Contains: Intestinal peptide PHV-42;, Intestinal peptide PHM-27 (Peptide histidine methioninamide 27);, Vasoactive intestinal peptide (VIP) (Vasoactive intestinal, polypeptide)].] | Go Component not found |
| P01344 | [Insulin-like growth factor II precursor (IGF-II) (Somatomedin-A), [Contains: Insulin-like growth factor II Ala-25 Del].]                                                                                    | Go Component not found |
| P01571 | [Interferon alpha-17 precursor (Interferon alpha-I') (Interferon alpha-, T) (Interferon alpha-88).]                                                                                                          | Go Component not found |
| P01834 | Ig kappa chain C region.                                                                                                                                                                                     | Go Component not found |
| P01854 | Ig epsilon chain C region.                                                                                                                                                                                   | Go Component not found |
| P01876 | Ig alpha-1 chain C region.                                                                                                                                                                                   | Go Component not found |
| P01918 | [HLA class II histocompatibility antigen, DQ(1) beta chain precursor, (DC-3 beta chain).]                                                                                                                    | Go Component not found |
| P02144 | Myoglobin.                                                                                                                                                                                                   | Go Component not found |
| P02788 | [Lactotransferrin precursor (EC 3.4.21.-) (Lactoferrin), (Talakalactoferrin alfa) [Contains: Kaliocin-1; Lactoferroxin A;, Lactoferroxin B; Lactoferroxin C].]                                               | Go Component not found |
| P04080 | Cystatin-B (Stefin-B) (Liver thiol proteinase inhibitor) (CPI-B).                                                                                                                                            | Go Component not found |
| P04090 | Prorelaxin H2 precursor [Contains: Relaxin B chain; Relaxin A chain].]                                                                                                                                       | Go Component not found |
| P05060 | [Secretogranin-1 precursor (Secretogranin I) (Sgl) (Chromogranin-B), (CgB) [Contains: GAWK peptide; CCB peptide].]                                                                                           | Go Component not found |
| P05108 | [Cytochrome P450 11A1, mitochondrial precursor (EC 1.14.15.6) (CYPXIA1), (P450(scc)) (Cholesterol side-chain cleavage enzyme) (Cholesterol, desmolase).]                                                     | Go Component not found |
| P05129 | Protein kinase C gamma type (EC 2.7.11.13) (PKC-gamma).                                                                                                                                                      | Go Component not found |
| P05156 | [Complement factor I precursor (EC 3.4.21.45) (C3B/C4B inactivator), [Contains: Complement factor I heavy chain; Complement factor I light, chain].]                                                         | Go Component not found |
| P05423 | [DNA-directed RNA polymerase III subunit RPC4 (RNA polymerase III, subunit C4) (DNA-directed RNA polymerase III subunit D) (DNA-directed, RNA polymerase III 47 kDa polypeptide) (RPC53) (Protein BN51).]    | Go Component not found |
| P06702 | [Protein S100-A9 (S100 calcium-binding protein A9) (Calgranulin-B), (Migration inhibitory factor-related protein 14) (MRP-14) (P14), (Leukocyte L1 complex heavy chain) (Calprotectin L1H subunit).]         | Go Component not found |
| P06744 | [Glucose-6-phosphate isomerase (EC 5.3.1.9) (GPI) (Phosphoglucose, isomerase) (PGI) (Phosphohexose isomerase) (PHI) (Neuroleukin) (NLK), (Sperm antigen 36) (SA-36).]                                        | Go Component not found |
| P07332 | Proto-oncogene tyrosine-protein kinase Fes/Fps (EC 2.7.10.2) (C-Fes).                                                                                                                                        | Go Component not found |
| P07384 | [Calpain-1 catalytic subunit (EC 3.4.22.52) (Calpain-1 large subunit), (Calcium-activated neutral proteinase 1) (CANP 1) (Calpain mu-type), (muCANP) (Micromolar-calpain).]                                  | Go Component not found |
| P21980 | [Protein-glutamine gamma-glutamyltransferase 2 (EC 2.3.2.13) (Tissue, transglutaminase) (TGase C) (TGC) (TG(C)) (Transglutaminase-2) (TGase-, H).]                                                           | Go Component not found |

|        |                                                                                                                                                                                                                                                                                                                                                 |                        |
|--------|-------------------------------------------------------------------------------------------------------------------------------------------------------------------------------------------------------------------------------------------------------------------------------------------------------------------------------------------------|------------------------|
| P22059 | Oxysterol-binding protein 1.                                                                                                                                                                                                                                                                                                                    | Go Component not found |
| P22309 | [UDP-glucuronosyltransferase 1-1 precursor (EC 2.4.1.17) (UDP-, glucuronosyltransferase 1A1) (UDPGT) (UGT1*1) (UGT1-01) (UGT1.1) (UGT-, 1A) (UGT1A) (Bilirubin-specific UDPGT isozyme 1) (HUG-BR1).]                                                                                                                                            | Go Component not found |
| P22676 | Calretinin (CR) (29 kDa calbindin).                                                                                                                                                                                                                                                                                                             | Go Component not found |
| P22794 | [EVI2A protein precursor (Ecotropic viral integration site 2A protein, homolog) (EVI-2A).]                                                                                                                                                                                                                                                      | Go Component not found |
| P22914 | Beta-crystallin S (Gamma-crystallin S) (Gamma-S-crystallin).                                                                                                                                                                                                                                                                                    | Go Component not found |
| P23141 | [Liver carboxylesterase 1 precursor (EC 3.1.1.1) (Acyl coenzyme, A:cholesterol acyltransferase) (ACAT) (Monocyte/macrophage serine, esterase) (HMSE) (Serine esterase 1) (Brain carboxylesterase hBr1), (Triacylglycerol hydrolase) (TGH) (Egasyn) (Retinyl ester hydrolase), (REH).]                                                           | Go Component not found |
| P23378 | [Glycine dehydrogenase [decarboxylating], mitochondrial precursor, (EC 1.4.4.2) (Glycine decarboxylase) (Glycine cleavage system P-, protein).]                                                                                                                                                                                                 | Go Component not found |
| P23458 | Tyrosine-protein kinase JAK1 (EC 2.7.10.2) (Janus kinase 1) (JAK-1).                                                                                                                                                                                                                                                                            | Go Component not found |
| P23508 | Colorectal mutant cancer protein (Protein MCC).                                                                                                                                                                                                                                                                                                 | Go Component not found |
| P23743 | [Diacylglycerol kinase alpha (EC 2.7.1.107) (Diglyceride kinase alpha), (DGK-alpha) (DAG kinase alpha) (80 kDa diacylglycerol kinase).]                                                                                                                                                                                                         | Go Component not found |
| P24723 | Protein kinase C eta type (EC 2.7.11.13) (nPKC-eta) (PKC-L).                                                                                                                                                                                                                                                                                    | Go Component not found |
| P25092 | [Heat-stable enterotoxin receptor precursor (EC 4.6.1.2) (GC-C), (Intestinal guanylate cyclase) (STA receptor) (hSTAR).]                                                                                                                                                                                                                        | Go Component not found |
| P25325 | 3-mercaptopyruvate sulfurtransferase (EC 2.8.1.2) (MST).                                                                                                                                                                                                                                                                                        | Go Component not found |
| P80294 | [Metallothionein-1H (MT-1H) (Metallothionein-IH) (MT-IH), (Metallothionein-0) (MT-0).]                                                                                                                                                                                                                                                          | Go Component not found |
| P26196 | [Probable ATP-dependent RNA helicase DDX6 (EC 3.6.1.-) (DEAD box, protein 6) (ATP-dependent RNA helicase p54) (Oncogene RCK).]                                                                                                                                                                                                                  | Go Component not found |
| P26367 | Paired box protein Pax-6 (Oculorhombin) (Aniridia type II protein).                                                                                                                                                                                                                                                                             | Go Component not found |
| P26436 | Acrosomal protein SP-10 precursor (Acrosomal vesicle protein 1).                                                                                                                                                                                                                                                                                | Go Component not found |
| P26441 | Ciliary neurotrophic factor (CNTF).                                                                                                                                                                                                                                                                                                             | Go Component not found |
| P26678 | Cardiac phospholamban (PLB).                                                                                                                                                                                                                                                                                                                    | Go Component not found |
| P27487 | [Dipeptidyl peptidase 4 (EC 3.4.14.5) (Dipeptidyl peptidase IV) (DPP, IV) (T-cell activation antigen CD26) (TP103) (Adenosine deaminase, complexing protein 2) (ADABP) [Contains: Dipeptidyl peptidase 4, membrane form (Dipeptidyl peptidase IV membrane form); Dipeptidyl, peptidase 4 soluble form (Dipeptidyl peptidase IV soluble form)].] | Go Component not found |
| P27930 | [Interleukin-1 receptor type II precursor (IL-1R-2) (IL-1R-beta), (CD121b antigen) (CDw121b).]                                                                                                                                                                                                                                                  | Go Component not found |
| P28698 | [Myeloid zinc finger 1 (MZF-1) (Zinc finger protein 42) (Zinc finger, and SCAN domain-containing protein 6).]                                                                                                                                                                                                                                   | Go Component not found |
| P29122 | [Proprotein convertase subtilisin/kexin type 6 precursor (EC 3.4.21.-), (Paired basic amino acid cleaving enzyme 4) (Subtilisin/kexin-like, protease PACE4) (Subtilisin-like proprotein convertase 4) (SPC4).]                                                                                                                                  | Go Component not found |
| P29377 | [Protein S100-G (S100 calcium-binding protein G) (Vitamin D-dependent, calcium-binding protein, intestinal) (CABP) (Calbindin-D9k).]                                                                                                                                                                                                            | Go Component not found |
| P29508 | Serpin B3 (Squamous cell carcinoma antigen 1) (SCCA-1) (Protein T4-A).                                                                                                                                                                                                                                                                          | Go Component not found |
| P29622 | [Kallistatin precursor (Serpin A4) (Kallikrein inhibitor) (Protease, inhibitor 4).]                                                                                                                                                                                                                                                             | Go Component not found |
| P29777 | Guanine nucleotide-binding protein G(o) subunit alpha 2.                                                                                                                                                                                                                                                                                        | Go Component not found |
| P30307 | [M-phase inducer phosphatase 3 (EC 3.1.3.48) (Dual specificity, phosphatase Cdc25C).]                                                                                                                                                                                                                                                           | Go Component not found |
| P30453 | [HLA class I histocompatibility antigen, A-34 alpha chain precursor, (MHC class I antigen A*34) (Aw-34) (A-10).]                                                                                                                                                                                                                                | Go Component not found |

|        |                                                                                                                                                                                                                                                                       |                        |
|--------|-----------------------------------------------------------------------------------------------------------------------------------------------------------------------------------------------------------------------------------------------------------------------|------------------------|
| P30485 | [HLA class I histocompatibility antigen, B-47 alpha chain precursor, (MHC class I antigen B*47) (Bw-47).]                                                                                                                                                             | Go Component not found |
| P31153 | [S-adenosylmethionine synthetase isoform type-2 (EC 2.5.1.6), (Methionine adenosyltransferase 2) (AdoMet synthetase 2) (Methionine, adenosyltransferase II) (MAT-II).]                                                                                                | Go Component not found |
| P31270 | Homeobox protein Hox-A11 (Hox-11).                                                                                                                                                                                                                                    | Go Component not found |
| P31483 | [Nucleolysin TIA-1 isoform p40 (RNA-binding protein TIA-1) (p40-TIA-1), [Contains: Nucleolysin TIA-1 isoform p15 (p15-TIA-1)].]                                                                                                                                       | Go Component not found |
| P32455 | [Interferon-induced guanylate-binding protein 1 (GTP-binding protein 1), (Guanine nucleotide-binding protein 1) (GBP-1) (HuGBP-1).]                                                                                                                                   | Go Component not found |
| P32754 | [4-hydroxyphenylpyruvate dioxygenase (EC 1.13.11.27) (4HPPD) (HPD), (HPPDase) (4-hydroxyphenylpyruvic acid oxidase).]                                                                                                                                                 | Go Component not found |
| P33121 | [Long-chain-fatty-acid--CoA ligase 1 (EC 6.2.1.3) (Long-chain acyl-CoA, synthetase 1) (LACS 1) (Palmitoyl-CoA ligase 1) (Long-chain fatty, acid-CoA ligase 2) (Long-chain acyl-CoA synthetase 2) (LACS 2) (Acyl-, CoA synthetase 1) (ACS1) (Palmitoyl-CoA ligase 2).] | Go Component not found |
| P33260 | Cytochrome P450 2C18 (EC 1.14.14.1) (CYP11C18) (P450-6B/29C).                                                                                                                                                                                                         | Go Component not found |
| P33552 | Cyclin-dependent kinases regulatory subunit 2 (CKS-2).                                                                                                                                                                                                                | Go Component not found |
| P35270 | Sepiapterin reductase (EC 1.1.1.153) (SPR).                                                                                                                                                                                                                           | Go Component not found |
| P35453 | Homeobox protein Hox-D13 (Hox-4l).                                                                                                                                                                                                                                    | Go Component not found |
| P35557 | [Glucokinase (EC 2.7.1.2) (Hexokinase-4) (Hexokinase type IV) (HK IV), (HK4) (Hexokinase-D).]                                                                                                                                                                         | Go Component not found |
| P35611 | Alpha-adducin (Erythrocyte adducin subunit alpha).                                                                                                                                                                                                                    | Go Component not found |
| P35680 | [Hepatocyte nuclear factor 1-beta (HNF-1-beta) (HNF-1B) (Variant, hepatic nuclear factor 1) (VHNF1) (Homeoprotein LFB3) (Transcription, factor 2) (TCF-2).]                                                                                                           | Go Component not found |
| P36508 | Zinc finger protein 76.                                                                                                                                                                                                                                               | Go Component not found |
| P36952 | Serpin B5 precursor (Maspin) (Protease inhibitor 5).                                                                                                                                                                                                                  | Go Component not found |
| P36959 | [GMP reductase 1 (EC 1.7.1.7) (Guanosine 5'-monophosphate, oxidoreductase 1) (Guanosine monophosphate reductase 1).]                                                                                                                                                  | Go Component not found |
| P40394 | [Alcohol dehydrogenase class 4 mu/sigma chain (EC 1.1.1.1) (Alcohol, dehydrogenase class IV mu/sigma chain) (Retinol dehydrogenase), (Gastric alcohol dehydrogenase).]                                                                                                | Go Component not found |
| P40818 | [Ubiquitin carboxyl-terminal hydrolase 8 (EC 3.1.2.15) (Ubiquitin, thioesterase 8) (Ubiquitin-specific-processing protease 8), (Deubiquitinating enzyme 8) (hUBPy).]                                                                                                  | Go Component not found |
| P41002 | G2/mitotic-specific cyclin-F.                                                                                                                                                                                                                                         | Go Component not found |
| P41161 | ETS translocation variant 5 (Ets-related protein ERM).                                                                                                                                                                                                                | Go Component not found |
| P41226 | Ubiquitin-activating enzyme E1 homolog (D8).                                                                                                                                                                                                                          | Go Component not found |
| P58304 | [Visual system homeobox 2 (Homeobox protein CHX10) (Ceh-10 homeodomain-, containing homolog).]                                                                                                                                                                        | Go Component not found |
| P60059 | Protein transport protein SEC61 subunit gamma.                                                                                                                                                                                                                        | Go Component not found |
| P61019 | Ras-related protein Rab-2A.                                                                                                                                                                                                                                           | Go Component not found |
| P61105 | Ras-related protein Rab-2A.                                                                                                                                                                                                                                           | Go Component not found |
| P61619 | [Protein transport protein Sec61 subunit alpha isoform 1 (Sec61 alpha-, 1).]                                                                                                                                                                                          | Go Component not found |
| P61920 | [Hemoglobin subunit gamma-1 (Hemoglobin gamma-1 chain) (Gamma-1-globin), (Hemoglobin gamma-A chain).]                                                                                                                                                                 | Go Component not found |
| P62253 | [Ubiquitin-conjugating enzyme E2 G1 (EC 6.3.2.19) (Ubiquitin-protein, ligase G1) (Ubiquitin carrier protein G1) (E217K) (UBC7).]                                                                                                                                      | Go Component not found |
| P62760 | Visinin-like protein 1 (VILIP) (Hippocalcin-like protein 3) (HLP3).                                                                                                                                                                                                   | Go Component not found |
| P62910 | 60S ribosomal protein L32.                                                                                                                                                                                                                                            | Go Component not found |

|        |                                                                                                                                                                                                                         |                        |
|--------|-------------------------------------------------------------------------------------------------------------------------------------------------------------------------------------------------------------------------|------------------------|
| P62987 | 60S ribosomal protein L40 (CEP52).                                                                                                                                                                                      | Go Component not found |
| P63244 | [Guanine nucleotide-binding protein subunit beta-2-like 1 (Guanine, nucleotide-binding protein subunit beta-like protein 12.3) (Receptor, of activated protein kinase C 1) (RACK1) (Receptor for activated C, kinase).] | Go Component not found |
| P78367 | Homeobox protein Nkx-3.2 (Bagpipe homeobox protein homolog 1).                                                                                                                                                          | Go Component not found |
| P80108 | [Phosphatidylinositol-glycan-specific phospholipase D precursor, (EC 3.1.4.50) (PI-G PLD) (Glycoprotein phospholipase D) (Glycosyl-, phosphatidylinositol-specific phospholipase D).]                                   | Go Component not found |
| P80108 | [Phosphatidylinositol-glycan-specific phospholipase D precursor, (EC 3.1.4.50) (PI-G PLD) (Glycoprotein phospholipase D) (Glycosyl-, phosphatidylinositol-specific phospholipase D).]                                   | Go Component not found |
| P80108 | [Phosphatidylinositol-glycan-specific phospholipase D precursor, (EC 3.1.4.50) (PI-G PLD) (Glycoprotein phospholipase D) (Glycosyl-, phosphatidylinositol-specific phospholipase D).]                                   | Go Component not found |
| P80108 | [Phosphatidylinositol-glycan-specific phospholipase D precursor, (EC 3.1.4.50) (PI-G PLD) (Glycoprotein phospholipase D) (Glycosyl-, phosphatidylinositol-specific phospholipase D).]                                   | Go Component not found |
| P80108 | [Phosphatidylinositol-glycan-specific phospholipase D precursor, (EC 3.1.4.50) (PI-G PLD) (Glycoprotein phospholipase D) (Glycosyl-, phosphatidylinositol-specific phospholipase D).]                                   | Go Component not found |
| P80108 | [Phosphatidylinositol-glycan-specific phospholipase D precursor, (EC 3.1.4.50) (PI-G PLD) (Glycoprotein phospholipase D) (Glycosyl-, phosphatidylinositol-specific phospholipase D).]                                   | Go Component not found |
| P80108 | [Phosphatidylinositol-glycan-specific phospholipase D precursor, (EC 3.1.4.50) (PI-G PLD) (Glycoprotein phospholipase D) (Glycosyl-, phosphatidylinositol-specific phospholipase D).]                                   | Go Component not found |
| P80108 | [Phosphatidylinositol-glycan-specific phospholipase D precursor, (EC 3.1.4.50) (PI-G PLD) (Glycoprotein phospholipase D) (Glycosyl-, phosphatidylinositol-specific phospholipase D).]                                   | Go Component not found |
| Q9BY66 | [Histone demethylase JARID1D (EC 1.14.11.-) (Jumonji/ARID domain-, containing protein 1D) (Protein SmcY) (Histocompatibility Y antigen), (H-Y).]                                                                        | Go Component not found |
| Q9C004 | Portein sprouty homolog 4 (Spry-4).                                                                                                                                                                                     | Go Component not found |
| P82094 | TATA element modulatory factor (TMF).                                                                                                                                                                                   | Go Component not found |
| P84095 | Rho-related GTP-binding protein RhoG precursor.                                                                                                                                                                         | Go Component not found |
| P98187 | Cytochrome P450 4F8 (EC 1.14.14.1) (CYP1VF8).                                                                                                                                                                           | Go Component not found |
| P98198 | [Probable phospholipid-transporting ATPase ID (EC 3.6.3.1) (ATPase, class I type 8B member 2).]                                                                                                                         | Go Component not found |
| Q00266 | [S-adenosylmethionine synthetase isoform type-1 (EC 2.5.1.6), (Methionine adenosyltransferase 1) (AdoMet synthetase 1) (Methionine, adenosyltransferase I/III) (MAT-I/III).]                                            | Go Component not found |
| Q00532 | [Cyclin-dependent kinase-like 1 (EC 2.7.11.22) (Serine/threonine-, protein kinase KKIALRE) (Protein kinase p42 KKIALRE).]                                                                                               | Go Component not found |
| Q00537 | [Serine/threonine-protein kinase PCTAIRE-2 (EC 2.7.11.22) (PCTAIRE-, motif protein kinase 2).]                                                                                                                          | Go Component not found |
| Q00613 | [Heat shock factor protein 1 (HSF 1) (Heat shock transcription factor, 1) (HSTF 1).]                                                                                                                                    | Go Component not found |
| Q00796 | Sorbitol dehydrogenase (EC 1.1.1.14) (L-idoitol 2-dehydrogenase).                                                                                                                                                       | Go Component not found |
| Q01101 | Insulinoma-associated protein 1 (Zinc finger protein IA-1).                                                                                                                                                             | Go Component not found |
| Q01484 | Ankyrin-2 (Brain ankyrin) (Ankyrin-B) (Non-erythroid ankyrin).                                                                                                                                                          | Go Component not found |
| Q01534 | Testis-specific Y-encoded protein 1 (Cancer/testis antigen 78) (CT78).                                                                                                                                                  | Go Component not found |
| Q01831 | [DNA-repair protein complementing XP-C cells (Xeroderma pigmentosum, group C-complementing protein) (p125).]                                                                                                            | Go Component not found |
| Q01970 | [1-phosphatidylinositol-4,5-bisphosphate phosphodiesterase beta-3, (EC 3.1.4.11) (Phosphoinositide phospholipase C) (Phospholipase C-, beta-3) (PLC-beta-3).]                                                           | Go Component not found |
| Q02086 | Transcription factor Sp2.                                                                                                                                                                                               | Go Component not found |

|        |                                                                                                                                                                                                                                                                                             |                        |
|--------|---------------------------------------------------------------------------------------------------------------------------------------------------------------------------------------------------------------------------------------------------------------------------------------------|------------------------|
| Q02386 | [Zinc finger protein 45 (BRC1744) (Zinc finger protein 13) (Zinc finger, protein KOX5).]                                                                                                                                                                                                    | Go Component not found |
| Q02509 | Otoconin 90 precursor (Oc90) (Phospholipase A2 homolog).                                                                                                                                                                                                                                    | Go Component not found |
| Q02577 | [Helix-loop-helix protein 2 (HEN2) (Nescient helix loop helix 2) (NSCL-, 2).]                                                                                                                                                                                                               | Go Component not found |
| Q02779 | [Mitogen-activated protein kinase kinase kinase 10 (EC 2.7.11.25), (Mixed lineage kinase 2) (Protein kinase MST).]                                                                                                                                                                          | Go Component not found |
| Q02817 | Mucin-2 precursor (Intestinal mucin-2).                                                                                                                                                                                                                                                     | Go Component not found |
| Q03014 | [Homeobox protein PRH (Hematopoietically-expressed homeobox) (Homeobox, protein HEX).]                                                                                                                                                                                                      | Go Component not found |
| Q03933 | [Heat shock factor protein 2 (HSF 2) (Heat shock transcription factor, 2) (HSTF 2).]                                                                                                                                                                                                        | Go Component not found |
| Q04864 | C-Rel proto-oncogene protein (C-Rel protein).                                                                                                                                                                                                                                               | Go Component not found |
| Q06210 | [Glucosamine--fructose-6-phosphate aminotransferase [isomerizing] 1, (EC 2.6.1.16) (Glutamine:fructose 6 phosphate amidotransferase 1), (Hexosephosphate aminotransferase 1) (D-fructose-6-phosphate, amidotransferase 1) (GFAT 1) (GFAT1).]                                                | Go Component not found |
| Q06413 | Myocyte-specific enhancer factor 2C.                                                                                                                                                                                                                                                        | Go Component not found |
| Q06455 | [Protein CBFA2T1 (Protein MTG8) (Protein ETO) (Eight twenty one, protein) (Cyclin-D-related protein) (Zinc finger MYND domain-, containing protein 2).]                                                                                                                                     | Go Component not found |
| Q06643 | [Lymphotoxin-beta (LT-beta) (Tumor necrosis factor C) (TNF-C) (Tumor, necrosis factor ligand superfamily member 3).]                                                                                                                                                                        | Go Component not found |
| Q07000 | [HLA class I histocompatibility antigen, Cw-15 alpha chain precursor, (MHC class I antigen Cw*15).]                                                                                                                                                                                         | Go Component not found |
| Q07444 | [NKG2-E type II integral membrane protein (NKG2-E-activating NK, receptor) (NK cell receptor E).]                                                                                                                                                                                           | Go Component not found |
| Q07890 | Son of sevenless homolog 2 (SOS-2).                                                                                                                                                                                                                                                         | Go Component not found |
| Q08050 | [Forkhead box protein M1 (Forkhead-related protein FKHL16) (Hepatocyte, nuclear factor 3 forkhead homolog 11) (HNF-3/fork-head homolog 11), (HFH-11) (Winged-helix factor from INS-1 cells) (M-phase, phosphoprotein 2) (MPM-2 reactive phosphoprotein 2) (Transcription, factor Trident).] | Go Component not found |
| Q08257 | [Quinone oxidoreductase (EC 1.6.5.5) (NADPH:quinone reductase) (Zeta-, crystallin).]                                                                                                                                                                                                        | Go Component not found |
| Q08477 | [Cytochrome P450 4F3 (EC 1.14.13.30) (CYPIV3) (Leukotriene-B(4) omega-, hydroxylase) (Leukotriene-B(4) 20-monooxygenase) (Cytochrome P450-LTB-, omega).]                                                                                                                                    | Go Component not found |
| Q08752 | [40 kDa peptidyl-prolyl cis-trans isomerase (EC 5.2.1.8) (PPIase), (Rotamase) (Cyclophilin-40) (CYP-40) (Cyclophilin-related protein).]                                                                                                                                                     | Go Component not found |
| Q08999 | [Retinoblastoma-like protein 2 (130 kDa retinoblastoma-associated, protein) (p130) (PRB2) (RBR-2).]                                                                                                                                                                                         | Go Component not found |
| Q09428 | [ATP-binding cassette transporter sub-family C member 8 (Sulfonylurea, receptor 1).]                                                                                                                                                                                                        | Go Component not found |
| Q12766 | SMF protein (Fragment).                                                                                                                                                                                                                                                                     | Go Component not found |
| Q12788 | WD repeat-containing protein SAZD (Transducin beta-like 3 protein).                                                                                                                                                                                                                         | Go Component not found |
| Q12864 | [Cadherin-17 precursor (Liver-intestine cadherin) (LI-cadherin), (Intestinal peptide-associated transporter HPT-1).]                                                                                                                                                                        | Go Component not found |
| Q12889 | [Oviduct-specific glycoprotein precursor (Oviductal glycoprotein), (Oviductin) (Estrogen-dependent oviduct protein) (Mucin-9).]                                                                                                                                                             | Go Component not found |
| Q12931 | [Heat shock protein 75 kDa, mitochondrial precursor (HSP 75) (Tumor, necrosis factor type 1 receptor-associated protein) (TRAP-1) (TNFR-, associated protein 1).]                                                                                                                           | Go Component not found |
| Q12967 | Ral guanine nucleotide dissociation stimulator (RalGEF) (RalGDS).                                                                                                                                                                                                                           | Go Component not found |
| Q13043 | [Serine/threonine-protein kinase 4 (EC 2.7.11.1) (STE20-like kinase, MST1) (MST-1) (Mammalian STE20-like protein kinase 1), (Serine/threonine-protein kinase Krs-2).]                                                                                                                       | Go Component not found |
| Q13094 | [Lymphocyte cytosolic protein 2 (SH2 domain-containing leukocyte, protein of 76 kDa) (SLP-76 tyrosine phosphoprotein) (SLP76).]                                                                                                                                                             | Go Component not found |
| Q13114 | [TNF receptor-associated factor 3 (CD40 receptor-associated factor 1), (CRAF1) (CD40-binding protein) (CD40BP) (LMP1-associated protein), (LAP1) (CAP-1).]                                                                                                                                  | Go Component not found |

|        |                                                                                                                                                                                                                                                           |                        |
|--------|-----------------------------------------------------------------------------------------------------------------------------------------------------------------------------------------------------------------------------------------------------------|------------------------|
| Q13162 | [Peroxisome oxidoreductase 4 (EC 1.11.1.15) (Prx-IV) (Thioredoxin peroxidase A0372), (Thioredoxin-dependent peroxide reductase A0372) (Antioxidant enzyme, AOE372) (AOE37-2).]                                                                            | Go Component not found |
| Q13188 | [Serine/threonine-protein kinase 3 (EC 2.7.11.1) (STE20-like kinase, MST2) (MST-2) (Mammalian STE20-like protein kinase 2), (Serine/threonine-protein kinase Krs-1).]                                                                                     | Go Component not found |
| Q13203 | Myosin-binding protein H (MyBP-H) (H-protein).                                                                                                                                                                                                            | Go Component not found |
| Q13233 | [Mitogen-activated protein kinase kinase kinase 1 (EC 2.7.11.25), (MAPK/ERK kinase kinase 1) (MEK kinase 1) (MEKK 1).]                                                                                                                                    | Go Component not found |
| Q13247 | [Splicing factor, arginine/serine-rich 6 (Pre-mRNA-splicing factor, SRP55).]                                                                                                                                                                              | Go Component not found |
| Q13315 | [Serine-protein kinase ATM (EC 2.7.11.1) (Ataxia telangiectasia, mutated) (A-T, mutated).]                                                                                                                                                                | Go Component not found |
| Q93034 | [Cullin-5 (CUL-5) (Vasopressin-activated calcium-mobilizing receptor), (VACM-1).]                                                                                                                                                                         | Go Component not found |
| Q93100 | [Phosphorylase b kinase regulatory subunit beta (Phosphorylase kinase, subunit beta).]                                                                                                                                                                    | Go Component not found |
| Q96MY1 | Uncharacterized protein C20orf112.                                                                                                                                                                                                                        | Go Component not found |
| Q99453 | [Paired mesoderm homeobox protein 2B (Paired-like homeobox 2B) (PHOX2B, homeodomain protein) (Neuroblastoma Phox) (NBPhox).]                                                                                                                              | Go Component not found |
| Q99504 | Eyes absent homolog 3 (EC 3.1.3.48).                                                                                                                                                                                                                      | Go Component not found |
| Q99538 | [Legumain precursor (EC 3.4.22.34) (Asparaginyl endopeptidase), (Protease, cysteine 1).]                                                                                                                                                                  | Go Component not found |
| Q99558 | [Mitogen-activated protein kinase kinase kinase 14 (EC 2.7.11.25) (NF-, kappa beta-inducing kinase) (Serine/threonine-protein kinase NIK), (HsNIK).]                                                                                                      | Go Component not found |
| Q99584 | Protein S100-A13 (S100 calcium-binding protein A13).                                                                                                                                                                                                      | Go Component not found |
| Q99608 | Necdin.                                                                                                                                                                                                                                                   | Go Component not found |
| Q99683 | [Mitogen-activated protein kinase kinase kinase 5 (EC 2.7.11.25), (MAPK/ERK kinase kinase 5) (MEK kinase 5) (MEKK 5) (Apoptosis signal-, regulating kinase 1) (ASK-1).]                                                                                   | Go Component not found |
| Q99689 | Fasciculation and elongation protein zeta 1 (Zygin-1) (Zygin I).                                                                                                                                                                                          | Go Component not found |
| Q99707 | [Methionine synthase (EC 2.1.1.13) (5-methyltetrahydrofolate-, homocysteine methyltransferase) (Methionine synthase, vitamin-B12, dependent) (MS).]                                                                                                       | Go Component not found |
| Q99909 | Protein Ssx3 (Cancer/testis antigen 5.3) (CT5.3).                                                                                                                                                                                                         | Go Component not found |
| Q9BS92 | Protein NipSnap3B (SNAP1).                                                                                                                                                                                                                                | Go Component not found |
| Q9BXT4 | [Tudor domain-containing protein 1 (Cancer/testis antigen 41.1), (CT41.1).]                                                                                                                                                                               | Go Component not found |
| Q9GZV8 | PR domain zinc finger protein 14 (PR domain-containing protein 14).                                                                                                                                                                                       | Go Component not found |
| Q9H0N5 | [Pterin-4-alpha-carbinolamine dehydratase 2 (EC 4.2.1.96) (PHS 2) (4-, alpha-hydroxy-tetrahydropterin dehydratase 2) (DcoH-like protein, DCoHm) (Dimerization cofactor of hepatocyte nuclear factor 1 from, muscle) (HNF-1-alpha dimerization cofactor).] | Go Component not found |
| Q9H169 | Stathmin-4 (Stathmin-like protein B3) (RB3).                                                                                                                                                                                                              | Go Component not found |
| Q9H4B4 | [Serine/threonine-protein kinase PLK3 (EC 2.7.11.21) (Polo-like kinase, 3) (PLK-3) (Cytokine-inducible serine/threonine-protein kinase) (FGF-, inducible kinase) (Proliferation-related kinase).]                                                         | Go Component not found |
| Q9H4Q3 | PR domain zinc finger protein 13 (PR domain-containing protein 13).                                                                                                                                                                                       | Go Component not found |
| Q9H9D4 | Zinc finger protein 408 (PR domain zinc finger protein 17).                                                                                                                                                                                               | Go Component not found |
| Q9HAS0 | Protein Njmu-R1.                                                                                                                                                                                                                                          | Go Component not found |
| Q9HCH3 | Copine-5 (Copine V).                                                                                                                                                                                                                                      | Go Component not found |
| Q9HCS5 | Band 4.1-like protein 4A (Protein NBL4).                                                                                                                                                                                                                  | Go Component not found |
| Q9NP87 | DNA polymerase mu (EC 2.7.7.7) (Pol Mu).                                                                                                                                                                                                                  | Go Component not found |



|        |                                                                                                                                                                                                                                      |                        |
|--------|--------------------------------------------------------------------------------------------------------------------------------------------------------------------------------------------------------------------------------------|------------------------|
| Q9NPR2 | Semaphorin-4B precursor.                                                                                                                                                                                                             | Go Component not found |
| Q9NQV6 | PR domain zinc finger protein 10 (PR domain-containing protein 10).                                                                                                                                                                  | Go Component not found |
| Q9NQX1 | PR domain zinc finger protein 5 (PR domain-containing protein 5).                                                                                                                                                                    | Go Component not found |
| Q9NR61 | Delta-like protein 4 precursor (Drosophila Delta homolog 4).                                                                                                                                                                         | Go Component not found |
| Q9NRI5 | Disrupted in schizophrenia 1 protein.                                                                                                                                                                                                | Go Component not found |
| Q9NRZ5 | [1-acyl-sn-glycerol-3-phosphate acyltransferase delta (EC 2.3.1.51) (1-, AGP acyltransferase 4) (1-AGPAT 4) (Lysophosphatidic acid, acyltransferase delta) (LPAAT-delta) (1-acylglycerol-3-phosphate O-, acyltransferase 4).]        | Go Component not found |
| Q9NSI8 | [SAM domain-containing protein SAMSN-1 (SAM domain, SH3 domain and, nuclear localization signals protein 1) (SH3-SAM adaptor protein), (Hematopoietic adaptor containing SH3 and SAM domains 1).]                                    | Go Component not found |
| Q9NTN9 | Semaphorin-4G precursor.                                                                                                                                                                                                             | Go Component not found |
| Q9NVF9 | [Ethanolamine kinase 2 (EC 2.7.1.82) (EKI 2) (Ethanolamine kinase-like, protein).]                                                                                                                                                   | Go Component not found |
| Q9NY12 | [H/ACA ribonucleoprotein complex subunit 1 (Nucleolar protein family A, member 1) (snoRNP protein GAR1).]                                                                                                                            | Go Component not found |
| Q9NYI0 | [PH and SEC7 domain-containing protein 3 (Pleckstrin homology and SEC7, domain-containing protein 3) (Exchange factor for ADP-ribosylation, factor guanine nucleotide factor 6) (Hepatocellular carcinoma-, associated antigen 67).] | Go Component not found |
| Q9NYP9 | Uncharacterized protein C21orf45 (FAPP1-associated protein 1).                                                                                                                                                                       | Go Component not found |
| Q9NYT6 | Zinc finger protein 226.                                                                                                                                                                                                             | Go Component not found |
| Q9NZ50 | Gamma-synuclein (Synoretin) (SR).                                                                                                                                                                                                    | Go Component not found |
| Q9NZJ4 | Saccin.                                                                                                                                                                                                                              | Go Component not found |
| Q9NZU6 | Calcium-binding protein 3 (CaBP3).                                                                                                                                                                                                   | Go Component not found |
| Q9P286 | [Serine/threonine-protein kinase PAK 7 (EC 2.7.11.1) (p21-activated, kinase 7) (PAK-7) (PAK-5).]                                                                                                                                     | Go Component not found |
| Q9P2J3 | Kelch-like protein 9.                                                                                                                                                                                                                | Go Component not found |
| Q9P2N7 | Kelch-like protein 13 (BTB and kelch domain-containing protein 2).                                                                                                                                                                   | Go Component not found |
| Q9P2S5 | WD repeat-containing protein 8.                                                                                                                                                                                                      | Go Component not found |
| Q9UBX7 | [Kallikrein-11 precursor (EC 3.4.21.-) (hK11) (Hippostasin) (Trypsin-, like protease) (Serine protease 20) [Contains: Kallikrein-11 inactive, chain 1; Kallikrein-11 inactive chain 2].]                                             | Go Component not found |
| Q9UDY4 | [DnaJ homolog subfamily B member 4 (Heat shock 40 kDa protein 1, homolog) (Heat shock protein 40 homolog) (HSP40 homolog).]                                                                                                          | Go Component not found |
| Q9UEU0 | [Vesicle transport through interaction with t-SNAREs homolog 1B, (Vesicle transport v-SNARE protein Vti1-like 1) (Vti1-rp1).]                                                                                                        | Go Component not found |
| Q9UGF7 | Olfactory receptor 12D3 (Olfactory receptor OR6-27) (Hs6M1-27).                                                                                                                                                                      | Go Component not found |
| Q9UGJ0 | [5'-AMP-activated protein kinase subunit gamma-2 (AMPK gamma-2 chain), (AMPK gamma2) (H91620p).]                                                                                                                                     | Go Component not found |
| Q9UH17 | [Probable DNA dC->dU-editing enzyme APOBEC-3B (EC 3.5.4.-) (Phorbolin-, 1-related protein) (Phorbolin-2/3).]                                                                                                                         | Go Component not found |
| Q9UHL4 | [Dipeptidyl-peptidase 2 precursor (EC 3.4.14.2) (Dipeptidyl-peptidase, II) (DPP II) (Dipeptidyl aminopeptidase II) (Quiescent cell proline, dipeptidase) (Dipeptidyl peptidase 7).]                                                  | Go Component not found |
| Q9UHP9 | Small muscular protein (Stretch-responsive skeletal muscle protein).                                                                                                                                                                 | Go Component not found |
| Q9UIA0 | Cytohesin-4 (PH, SEC7 and coiled-coil domain-containing protein 4).                                                                                                                                                                  | Go Component not found |
| Q9UIE0 | Zinc finger protein 230 (Zinc finger protein FDZF2).                                                                                                                                                                                 | Go Component not found |
| Q9UIU6 | Homeobox protein SIX4 (Sine oculis homeobox homolog 4).                                                                                                                                                                              | Go Component not found |
| Q9UJ72 | Annexin A10 (Annexin-10) (Annexin-14).                                                                                                                                                                                               | Go Component not found |
| Q9UJV9 | [Probable ATP-dependent RNA helicase DDX41 (EC 3.6.1.-) (DEAD box, protein 41) (DEAD box protein abstrakt homolog).]                                                                                                                 | Go Component not found |

|        |                                                                                                                                                                                            |                        |
|--------|--------------------------------------------------------------------------------------------------------------------------------------------------------------------------------------------|------------------------|
| Q9UK05 | [Growth/differentiation factor 2 precursor (GDF-2) (Bone morphogenetic, protein 9) (BMP-9).]                                                                                               | Go Component not found |
| Q9UK12 | Zinc finger protein 222.                                                                                                                                                                   | Go Component not found |
| Q9UK32 | [Ribosomal protein S6 kinase alpha-6 (EC 2.7.11.1) (S6K-alpha 6) (90, kDa ribosomal protein S6 kinase 6) (p90-RSK 6) (Ribosomal S6 kinase 4), (RSK-4) (pp90RSK4).]                         | Go Component not found |
| Q9UKJ3 | G patch domain-containing protein 8.                                                                                                                                                       | Go Component not found |
| Q9UKP4 | [ADAMTS-7 precursor (EC 3.4.24.-) (A disintegrin and metalloproteinase, with thrombospondin motifs 7) (ADAM-TS 7) (ADAM-TS7).]                                                             | Go Component not found |
| Q9ULC5 | [Long-chain-fatty-acid--CoA ligase 5 (EC 6.2.1.3) (Long-chain acyl-CoA, synthetase 5) (LACS 5).]                                                                                           | Go Component not found |
| Q9ULI0 | ATPase family AAA domain-containing protein 2B.                                                                                                                                            | Go Component not found |
| Q9ULK2 | Ataxin-7-like protein 1 (Fragment).                                                                                                                                                        | Go Component not found |
| Q9UM63 | [Zinc finger protein PLAGL1 (Pleiomorphic adenoma-like protein 1), (Tumor supressor ZAC) (Lost on transformation 1) (LOT-1).]                                                              | Go Component not found |
| Q9UMQ6 | [Calpain-11 (EC 3.4.22.-) (Calcium-activated neutral proteinase 11), (CANP 11).]                                                                                                           | Go Component not found |
| Q9UMY4 | Sorting nexin-12.                                                                                                                                                                          | Go Component not found |
| Q9UNI6 | [Dual specificity protein phosphatase 12 (EC 3.1.3.48) (EC 3.1.3.16), (Dual specificity tyrosine phosphatase YVH1).]                                                                       | Go Component not found |
| Q9UNT1 | Rab-like protein 2B.                                                                                                                                                                       | Go Component not found |
| Q9UNY5 | [Zinc finger protein 232 (Zinc finger and SCAN domain-containing, protein 11).]                                                                                                            | Go Component not found |
| Q9UPE1 | [Serine/threonine-protein kinase SRPK3 (EC 2.7.11.1) (Serine/arginine-, rich protein specific kinase 3) (Serine/threonine-protein kinase 23), (Muscle-specific serine kinase 1) (MSSK-1).] | Go Component not found |
| Q9UPU5 | [Ubiquitin carboxyl-terminal hydrolase 24 (EC 3.1.2.15) (Ubiquitin, thioesterase 24) (Ubiquitin-specific-processing protease 24), (Deubiquitinating enzyme 24).]                           | Go Component not found |
| Q9UQ74 | Pregnancy-specific beta-1-glycoprotein 8 precursor (PSBG-8).                                                                                                                               | Go Component not found |
| Q9Y252 | RING finger protein 6 (RING-H2 protein).                                                                                                                                                   | Go Component not found |
| Q9Y295 | [Developmentally-regulated GTP-binding protein 1 (DRG 1) (Protein, NEDD3) (Neural precursor cell expressed developmentally down-regulated, protein 3).]                                    | Go Component not found |
| Q9Y2E5 | [Epididymis-specific alpha-mannosidase precursor (EC 3.2.1.24), (Mannosidase alpha class 2B member 2).]                                                                                    | Go Component not found |
| Q9Y2G7 | Zinc finger protein 30 homolog (Zfp-30) (Zinc finger protein 745).                                                                                                                         | Go Component not found |
| Q9Y2K6 | [Ubiquitin carboxyl-terminal hydrolase 20 (EC 3.1.2.15) (Ubiquitin, thioesterase 20) (Ubiquitin-specific-processing protease 20), (Deubiquitinating enzyme 20).]                           | Go Component not found |
| Q9Y2P7 | Zinc finger protein 256 (Bone marrow zinc finger 3) (BMZF-3).                                                                                                                              | Go Component not found |
| Q9Y2X7 | [ARF GTPase-activating protein GIT1 (G protein-coupled receptor kinase-, interactor 1) (GRK-interacting protein 1) (Cool-associated and, tyrosine-phosphorylated protein 1) (Cat-1).]      | Go Component not found |
| Q9Y2Z2 | Protein MTO1 homolog, mitochondrial precursor.                                                                                                                                             | Go Component not found |
| Q9Y376 | Calcium-binding protein 39 (Protein Mo25).                                                                                                                                                 | Go Component not found |
| Q9Y2V3 | [Retinal homeobox protein Rx (Retina and anterior neural fold homeobox, protein).]                                                                                                         | Go Component not found |
| A2RU54 | Homeobox protein HMX2 (Homeobox protein H6 family member 2).                                                                                                                               | Go Component not found |
| O00124 | [UBX domain-containing protein 6 (Reproduction 8 protein) (Protein Rep-, 8).]                                                                                                              | Go Component not found |
| O00142 | Thymidine kinase 2, mitochondrial precursor (EC 2.7.1.21) (Mt-TK).                                                                                                                         | Go Component not found |

|        |                                                                                                                                                                                                                                                                                                                                                                                   |                        |
|--------|-----------------------------------------------------------------------------------------------------------------------------------------------------------------------------------------------------------------------------------------------------------------------------------------------------------------------------------------------------------------------------------|------------------------|
| O00187 | [Mannan-binding lectin serine protease 2 precursor (EC 3.4.21.104), (Mannose-binding protein-associated serine protease 2) (MASP-2) (MBL-, associated serine protease 2) [Contains: Mannan-binding lectin serine, protease 2 A chain; Mannan-binding lectin serine protease 2 B chain].]                                                                                          | Go Component not found |
| O00198 | [Activator of apoptosis harakiri (Neuronal death protein DP5) (BH3-, interacting domain-containing protein 3).]                                                                                                                                                                                                                                                                   | Go Component not found |
| O00295 | [Tubby-related protein 2 (Tubby-like protein 2) (Cancer/testis antigen, 65) (CT65).]                                                                                                                                                                                                                                                                                              | Go Component not found |
| O00327 | [Aryl hydrocarbon receptor nuclear translocator-like protein 1 (Brain, and muscle ARNT-like 1) (Member of PAS protein 3) (Basic-helix-loop-, helix-PAS protein MOP3) (bHLH-PAS protein JAP3).]                                                                                                                                                                                    | Go Component not found |
| O00458 | [Interferon-related developmental regulator 1 (Nerve growth factor-, inducible protein PC4).]                                                                                                                                                                                                                                                                                     | Go Component not found |
| O00506 | [Serine/threonine-protein kinase 25 (EC 2.7.11.1) (Sterile 20/oxidant, stress-response kinase 1) (Ste20/oxidant stress response kinase 1), (SOK-1) (Ste20-like kinase).]                                                                                                                                                                                                          | Go Component not found |
| O00754 | [Lysosomal alpha-mannosidase precursor (EC 3.2.1.24) (Mannosidase, alpha B) (Lysosomal acid alpha-mannosidase) (Laman) (Mannosidase alpha, class 2B member 1) [Contains: Lysosomal alpha-mannosidase A peptide;, Lysosomal alpha-mannosidase B peptide; Lysosomal alpha-mannosidase C, peptide; Lysosomal alpha-mannosidase D peptide; Lysosomal alpha-, mannosidase E peptide].] | Go Component not found |
| O00763 | [Acetyl-CoA carboxylase 2 (EC 6.4.1.2) (ACC-beta) [Includes: Biotin, carboxylase (EC 6.3.4.14)].]                                                                                                                                                                                                                                                                                 | Go Component not found |
| O14581 | Olfactory receptor 7A17.                                                                                                                                                                                                                                                                                                                                                          | Go Component not found |
| O14609 | Testis-specific XK-related protein, Y-linked.                                                                                                                                                                                                                                                                                                                                     | Go Component not found |
| O14646 | [Chromodomain-helicase-DNA-binding protein 1 (EC 3.6.1.-) (ATP-, dependent helicase CHD1) (CHD-1).]                                                                                                                                                                                                                                                                               | Go Component not found |
| O14683 | Tumor protein p53-inducible protein 11 (p53-induced gene 11 protein).                                                                                                                                                                                                                                                                                                             | Go Component not found |
| O14717 | [tRNA (cytosine-5-)-methyltransferase (EC 2.1.1.29) (DNA (cytosine-5)-, methyltransferase-like protein 2) (Dnmt2) (DNA methyltransferase, homolog HsallP) (DNA MTase homolog HsallP) (M.HsallP) (PuMet).]                                                                                                                                                                         | Go Component not found |
| O14737 | [Programmed cell death protein 5 (Protein TFAR19) (TF-1 cell apoptosis-, related protein 19).]                                                                                                                                                                                                                                                                                    | Go Component not found |
| O14828 | [Secretory carrier-associated membrane protein 3 (Secretory carrier, membrane protein 3).]                                                                                                                                                                                                                                                                                        | Go Component not found |
| O14879 | [Interferon-induced protein with tetratricopeptide repeats 3 (IFIT-3), (IFIT-4) (Interferon-induced 60 kDa protein) (IFI-60K) (ISG-60), (CIG49) (Retinoic acid-induced gene G protein) (RIG-G).]                                                                                                                                                                                  | Go Component not found |
| O14896 | Interferon regulatory factor 6 (IRF-6).                                                                                                                                                                                                                                                                                                                                           | Go Component not found |
| O14957 | [Ubiquinol-cytochrome c reductase complex 6.4 kDa protein (EC 1.10.2.2), (Complex III subunit XI).]                                                                                                                                                                                                                                                                               | Go Component not found |
| O15015 | Zinc finger protein 646.                                                                                                                                                                                                                                                                                                                                                          | Go Component not found |
| O15040 | Uncharacterized protein KIAA0329/KIAA0297.                                                                                                                                                                                                                                                                                                                                        | Go Component not found |
| O15055 | [Period circadian protein homolog 2 (Circadian clock protein PERIOD 2), (hPER2).]                                                                                                                                                                                                                                                                                                 | Go Component not found |
| O15091 | Uncharacterized protein KIAA0391.                                                                                                                                                                                                                                                                                                                                                 | Go Component not found |
| O15127 | [Secretory carrier-associated membrane protein 2 (Secretory carrier, membrane protein 2).]                                                                                                                                                                                                                                                                                        | Go Component not found |
| O15266 | [Short stature homeobox protein (Short stature homeobox-containing, protein) (Pseudoautosomal homeobox-containing osteogenic protein).]                                                                                                                                                                                                                                           | Go Component not found |
| O15273 | Telethonin (Titin cap protein).                                                                                                                                                                                                                                                                                                                                                   | Go Component not found |
| O15350 | [Tumor protein p73 (p53-like transcription factor) (p53-related, protein).]                                                                                                                                                                                                                                                                                                       | Go Component not found |
| O15370 | SOX-12 protein (SOX-22 protein).                                                                                                                                                                                                                                                                                                                                                  | Go Component not found |
| O15479 | [Melanoma-associated antigen B2 (MAGE-B2 antigen) (DSS-AHC critical, interval MAGE superfamily 6) (DAM6) (MAGE XP-2) (Cancer/testis antigen, 3.2) (CT3.2).]                                                                                                                                                                                                                       | Go Component not found |

|        |                                                                                                                                                                                                                                                                                                                             |                        |
|--------|-----------------------------------------------------------------------------------------------------------------------------------------------------------------------------------------------------------------------------------------------------------------------------------------------------------------------------|------------------------|
| O15528 | [25-hydroxyvitamin D-1 alpha hydroxylase, mitochondrial precursor, (EC 1.14.13.13) (Cytochrome P450 subfamily XXVIIIB polypeptide 1), (Cytochrome p450 27B1) (Calcidiol 1-monooxygenase) (25-OHD-1 alpha-, hydroxylase) (25-hydroxyvitamin D(3) 1-alpha-hydroxylase) (VD3 1A, hydroxylase) (P450C1 alpha) (P450VD1-alpha).] | Go Component not found |
| O15541 | RING finger protein 113A (Zinc finger protein 183).                                                                                                                                                                                                                                                                         | Go Component not found |
| O15550 | [Ubiquitously transcribed X chromosome tetratricopeptide repeat protein, (Ubiquitously transcribed TPR protein on the X chromosome).]                                                                                                                                                                                       | Go Component not found |
| O43175 | D-3-phosphoglycerate dehydrogenase (EC 1.1.1.95) (3-PGDH).                                                                                                                                                                                                                                                                  | Go Component not found |
| O43186 | Cone-rod homeobox protein.                                                                                                                                                                                                                                                                                                  | Go Component not found |
| O43196 | MutS protein homolog 5.                                                                                                                                                                                                                                                                                                     | Go Component not found |
| O43248 | Homeobox protein Hox-C11.                                                                                                                                                                                                                                                                                                   | Go Component not found |
| O43295 | [SLIT-ROBO Rho GTPase-activating protein 3 (srGAP3) (srGAP2) (WAVE-, associated Rac GTPase-activating protein) (WRP) (Mental disorder-, associated GAP) (Rho GTPase-activating protein 14).]                                                                                                                                | Go Component not found |
| O43306 | [Adenylate cyclase type 6 (EC 4.6.1.1) (Adenylate cyclase type VI) (ATP, pyrophosphate-lyase 6) (Adenylyl cyclase 6) (Ca(2+)-inhibitable, adenylyl cyclase).]                                                                                                                                                               | Go Component not found |
| O43313 | Uncharacterized protein KIAA0431.                                                                                                                                                                                                                                                                                           | Go Component not found |
| O43474 | [Krueppel-like factor 4 (Epithelial zinc finger protein EZF) (Gut-, enriched krueppel-like factor).]                                                                                                                                                                                                                        | Go Component not found |
| O43541 | [Mothers against decapentaplegic homolog 6 (SMAD 6) (Mothers against, DPP homolog 6) (Smad6) (hSMAD6).]                                                                                                                                                                                                                     | Go Component not found |
| O43592 | Exportin-T (tRNA exportin) (Exportin(tRNA)).                                                                                                                                                                                                                                                                                | Go Component not found |
| O43734 | [Adapter protein CIKS (Connection to IKK and SAPK/JNK) (TRAF3-, interacting protein 2) (Nuclear factor NF-kappa-B activator 1) (ACT1).]                                                                                                                                                                                     | Go Component not found |
| O43795 | Myosin-Ib (Myosin I alpha) (MMI-alpha) (MMIa) (MYH-1c).                                                                                                                                                                                                                                                                     | Go Component not found |
| O43822 | Uncharacterized protein C21orf2 (C21orf-HUMF09G8.5) (YF5/A2).                                                                                                                                                                                                                                                               | Go Component not found |
| O43909 | [Exostosin-like 3 (EC 2.4.1.223) (Glucuronyl-galactosyl-proteoglycan 4-, alpha-N-acetylglucosaminyltransferase) (Putative tumor suppressor, protein EXTL3) (Multiple exostosis-like protein 3) (Hereditary, multiple exostoses gene isolog) (EXT-related protein 1).]                                                       | Go Component not found |
| O43921 | [Ephrin-A2 precursor (EPH-related receptor tyrosine kinase ligand 6), (LERK-6) (HEK7-ligand) (HEK7-L).]                                                                                                                                                                                                                     | Go Component not found |
| O60232 | Sjoegren syndrome/scleroderma autoantigen 1 (Autoantigen p27).                                                                                                                                                                                                                                                              | Go Component not found |
| O60299 | Uncharacterized protein KIAA0552.                                                                                                                                                                                                                                                                                           | Go Component not found |
| O60361 | [Putative nucleoside diphosphate kinase (EC 2.7.4.6) (NDK) (NDP, kinase).]                                                                                                                                                                                                                                                  | Go Component not found |
| O60658 | [High affinity cAMP-specific and IBMX-insensitive 3',5'-cyclic, phosphodiesterase 8A (EC 3.1.4.17).]                                                                                                                                                                                                                        | Go Component not found |
| O60676 | [Cystatin-8 precursor (Cystatin-related epididymal spermatogenic, protein).]                                                                                                                                                                                                                                                | Go Component not found |
| O60733 | [85 kDa calcium-independent phospholipase A2 (EC 3.1.1.4) (iPLA2) (Cal-, PLA2) (Group VI phospholipase A2) (GVI PLA2).]                                                                                                                                                                                                     | Go Component not found |
| O60810 | PRAME family member 4.                                                                                                                                                                                                                                                                                                      | Go Component not found |
| O60841 | [Eukaryotic translation initiation factor 5B (eIF-5B) (Translation, initiation factor IF-2).]                                                                                                                                                                                                                               | Go Component not found |
| O60941 | Dystrobrevin beta (Beta-dystrobrevin) (DTN-B).                                                                                                                                                                                                                                                                              | Go Component not found |
| O75185 | [Calcium-transporting ATPase type 2C member 2 (EC 3.6.3.8) (ATPase, 2C2).]                                                                                                                                                                                                                                                  | Go Component not found |
| O75317 | [Ubiquitin carboxyl-terminal hydrolase 12 (EC 3.1.2.15) (Ubiquitin, thioesterase 12) (Ubiquitin-specific-processing protease 12), (Deubiquitinating enzyme 12) (Ubiquitin-hydrolyzing enzyme 1).]                                                                                                                           | Go Component not found |
| O75330 | [Hyaluronan mediated motility receptor (Intracellular hyaluronic acid-, binding protein) (Receptor for hyaluronan-mediated motility) (CD168, antigen).]                                                                                                                                                                     | Go Component not found |

|        |                                                                                                                                                                                         |                        |
|--------|-----------------------------------------------------------------------------------------------------------------------------------------------------------------------------------------|------------------------|
| O75363 | [Breast carcinoma amplified sequence 1 (Novel amplified in breast, cancer 1) (Amplified and overexpressed in breast cancer).]                                                           | Go Component not found |
| O75376 | Nuclear receptor corepressor 1 (N-CoR1) (N-CoR).                                                                                                                                        | Go Component not found |
| O75437 | [Zinc finger protein 254 (Bone marrow zinc finger 5) (BMZF-5), (Hematopoietic cell-derived zinc finger protein 1) (HD-ZNF1) (Zinc, finger protein 539) (Zinc finger protein 91-like).]  | Go Component not found |
| O75493 | [Carbonic anhydrase-related protein 11 precursor (CA-XI) (CARP XI) (CA-, RP XI) (Carbonic anhydrase-related protein 2) (CARP-2) (CA-RP II).]                                            | Go Component not found |
| O75558 | Syntaxin-11.                                                                                                                                                                            | Go Component not found |
| O75601 | [Caspase-13 precursor (EC 3.4.22.-) (CASP-13) (Evolutionary related, interleukin-1-beta-converting enzyme) (ERICE) [Contains: Caspase-13, subunit 1; Caspase-13 subunit 2].]            | Go Component not found |
| O75616 | [GTP-binding protein era homolog (hERA) (ERA-W) (Conserved ERA-like, GTPase) (CEGA).]                                                                                                   | Go Component not found |
| O75695 | Protein XRP2.                                                                                                                                                                           | Go Component not found |
| O75844 | [CAAX prenyl protease 1 homolog (EC 3.4.24.84) (Prenyl protein-specific, endoprotease 1) (Farnesylated proteins-converting enzyme 1) (FACE-1), (Zinc metalloproteinase Ste24 homolog).] | Go Component not found |
| O75891 | [10-formyltetrahydrofolate dehydrogenase (EC 1.5.1.6) (10-FTHFDH), (Aldehyde dehydrogenase family 1 member L1).]                                                                        | Go Component not found |
| O75909 | Cyclin-K.                                                                                                                                                                               | Go Component not found |
| P07902 | [Galactose-1-phosphate uridylyltransferase (EC 2.7.7.12) (Gal-1-P, uridylyltransferase) (UDP-glucose--hexose-1-phosphate, uridylyltransferase).]                                        | Go Component not found |
| P07947 | [Proto-oncogene tyrosine-protein kinase Yes (EC 2.7.10.2) (p61-Yes) (c-, Yes).]                                                                                                         | Go Component not found |
| P08134 | Rho-related GTP-binding protein RhoC precursor (H9).                                                                                                                                    | Go Component not found |
| P08631 | [Tyrosine-protein kinase HCK (EC 2.7.10.2) (p59-HCK/p60-HCK), (Hemopoietic cell kinase).]                                                                                               | Go Component not found |
| P08684 | [Cytochrome P450 3A4 (EC 1.14.13.67) (Quinine 3-monooxygenase), (CYP3A4) (Nifedipine oxidase) (Taurochenodeoxycholate 6-alpha-, hydroxylase) (EC 1.14.13.97) (NF-25) (P450-PCN1).]      | Go Component not found |
| P08754 | Guanine nucleotide-binding protein G(k) subunit alpha (G(i) alpha-3).                                                                                                                   | Go Component not found |
| P09488 | [Glutathione S-transferase Mu 1 (EC 2.5.1.18) (GSTM1-1) (GST class-mu, 1) (GSTM1a-1a) (GSTM1b-1b) (HB subunit 4) (GTH4).]                                                               | Go Component not found |
| P09871 | [Complement C1s subcomponent precursor (EC 3.4.21.42) (C1 esterase), [Contains: Complement C1s subcomponent heavy chain; Complement C1s, subcomponent light chain].]                    | Go Component not found |
| P09913 | [Interferon-induced protein with tetratricopeptide repeats 2 (IFIT-2), (Interferon-induced 54 kDa protein) (IFI-54K) (ISG-54 K).]                                                       | Go Component not found |
| P09960 | [Leukotriene A-4 hydrolase (EC 3.3.2.6) (LTA-4 hydrolase) (Leukotriene, A(4) hydrolase).]                                                                                               | Go Component not found |
| P0C0L5 | [Complement C4-B precursor (Basic complement C4) [Contains: Complement, C4 beta chain; Complement C4-B alpha chain; C4a anaphylatoxin; C4b-B;, C4d-B; Complement C4 gamma chain].]      | Go Component not found |
| P10244 | Myb-related protein B (B-Myb).                                                                                                                                                          | Go Component not found |
| P10301 | Ras-related protein R-Ras precursor (p23).                                                                                                                                              | Go Component not found |
| P10635 | [Cytochrome P450 2D6 (EC 1.14.14.1) (CYP2D6) (P450-DB1) (Debrisoquine, 4-hydroxylase).]                                                                                                 | Go Component not found |
| P10721 | [Mast/stem cell growth factor receptor precursor (EC 2.7.10.1) (SCFR), (Proto-oncogene tyrosine-protein kinase Kit) (c-kit) (CD117 antigen).]                                           | Go Component not found |
| P10826 | [Retinoic acid receptor beta (RAR-beta) (RAR-epsilon) (HBV-activated, protein).]                                                                                                        | Go Component not found |
| P11473 | Vitamin D3 receptor (VDR) (1,25-dihydroxyvitamin D3 receptor).                                                                                                                          | Go Component not found |
| P11498 | [Pyruvate carboxylase, mitochondrial precursor (EC 6.4.1.1) (Pyruvic, carboxylase) (PCB).]                                                                                              | Go Component not found |
| P11686 | [Pulmonary surfactant-associated protein C precursor (SP-C) (SP5), (Pulmonary surfactant-associated proteolipid SPL(Val)).]                                                             | Go Component not found |

|        |                                                                                                                                                                                                                                                   |                        |
|--------|---------------------------------------------------------------------------------------------------------------------------------------------------------------------------------------------------------------------------------------------------|------------------------|
| P11766 | [Alcohol dehydrogenase class-3 (EC 1.1.1.1) (Alcohol dehydrogenase, class-III) (Alcohol dehydrogenase class chi chain) (S-, (hydroxymethyl)glutathione dehydrogenase) (EC 1.1.1.284) (Glutathione-, dependent formaldehyde dehydrogenase) (FDH).] | Go Component not found |
| P11844 | Gamma-crystallin A (Gamma-A-crystallin) (Gamma-crystallin 5).                                                                                                                                                                                     | Go Component not found |
| P12104 | Fatty acid-binding protein, intestinal (I-FABP) (FABPI).                                                                                                                                                                                          | Go Component not found |
| P12643 | Bone morphogenetic protein 2 precursor (BMP-2) (BMP-2A).                                                                                                                                                                                          | Go Component not found |
| P12955 | [Xaa-Pro dipeptidase (EC 3.4.13.9) (X-Pro dipeptidase) (Proline, dipeptidase) (Prolidase) (Imidodipeptidase).]                                                                                                                                    | Go Component not found |
| P13056 | Orphan nuclear receptor TR2 (Testicular receptor 2).                                                                                                                                                                                              | Go Component not found |
| P13349 | Myogenic factor 5 (Myf-5).                                                                                                                                                                                                                        | Go Component not found |
| P13497 | [Bone morphogenetic protein 1 precursor (EC 3.4.24.19) (BMP-1), (Procollagen C-proteinase) (PCP) (Mammalian tolloid protein) (mTld).]                                                                                                             | Go Component not found |
| P13612 | [Integrin alpha-4 precursor (Integrin alpha-IV) (VLA-4) (CD49d, antigen).]                                                                                                                                                                        | Go Component not found |
| P13682 | Zinc finger protein 35 (Zinc finger protein HF.10).                                                                                                                                                                                               | Go Component not found |
| P13798 | [Acylamino-acid-releasing enzyme (EC 3.4.19.1) (AARE) (Acyl-peptide, hydrolase) (APH) (Acylaminoacyl-peptidase) (Oxidized protein, hydrolase) (OPH).]                                                                                             | Go Component not found |
| P13928 | [Annexin A8 (Annexin-8) (Annexin VIII) (Vascular anticoagulant-beta), (VAC-beta).]                                                                                                                                                                | Go Component not found |
| P13984 | [Transcription initiation factor IIF subunit beta (EC 3.6.1.-) (TFIIF-, beta) (ATP-dependent helicase GTF2F2) (General transcription factor, IIF subunit 2) (Transcription initiation factor RAP30).]                                             | Go Component not found |
| P15309 | Prostatic acid phosphatase precursor (EC 3.1.3.2).                                                                                                                                                                                                | Go Component not found |
| P15336 | [Cyclic AMP-dependent transcription factor ATF-2 (Activating, transcription factor 2) (cAMP response element-binding protein CRE-, BP1) (HB16).]                                                                                                  | Go Component not found |
| P15498 | Proto-oncogene vav.                                                                                                                                                                                                                               | Go Component not found |
| P15538 | [Cytochrome P450 11B1, mitochondrial precursor (EC 1.14.15.4) (CYPXIB1), (P450C11) (P-450c11) (Steroid 11-beta-hydroxylase).]                                                                                                                     | Go Component not found |
| P15621 | [Zinc finger protein 44 (Zinc finger protein KOX7) (Gonadotropin-, inducible transcription repressor 2) (GIOT-2) (Zinc finger protein, 58).]                                                                                                      | Go Component not found |
| P15882 | [N-chimaerin (NC) (N-chimerin) (Alpha-chimerin) (A-chimaerin) (Rho, GTPase-activating protein 2).]                                                                                                                                                | Go Component not found |
| P16050 | [Arachidonate 15-lipoxygenase (EC 1.13.11.33) (Arachidonate omega-6, lipoxygenase) (15-LOX).]                                                                                                                                                     | Go Component not found |
| P16112 | [Aggrecan core protein precursor (Cartilage-specific proteoglycan core, protein) (CSPCP) (Chondroitin sulfate proteoglycan core protein 1), [Contains: Aggrecan core protein 2].]                                                                 | Go Component not found |
| P16885 | [1-phosphatidylinositol-4,5-bisphosphate phosphodiesterase gamma-2, (EC 3.1.4.11) (Phosphoinositide phospholipase C) (PLC-gamma-2), (Phospholipase C-gamma-2) (PLC-IV).]                                                                          | Go Component not found |
| P17020 | Zinc finger protein 16 (Zinc finger protein KOX9).                                                                                                                                                                                                | Go Component not found |
| P17040 | [Zinc finger and SCAN domain-containing protein 20 (Zinc finger protein, 31) (Zinc finger protein 360) (Zinc finger protein KOX29).]                                                                                                              | Go Component not found |
| P17342 | [Atrial natriuretic peptide clearance receptor precursor (ANP-C), (ANPRC) (NPR-C) (Atrial natriuretic peptide C-type receptor).]                                                                                                                  | Go Component not found |
| P17812 | [CTP synthase 1 (EC 6.3.4.2) (UTP--ammonia ligase 1) (CTP synthetase, 1).]                                                                                                                                                                        | Go Component not found |
| P18440 | [Arylamine N-acetyltransferase 1 (EC 2.3.1.5) (Arylamide acetylase 1), (Monomorphic arylamine N-acetyltransferase) (MNAT) (N-, acetyltransferase type 1) (NAT-1).]                                                                                | Go Component not found |
| P18846 | [Cyclic AMP-dependent transcription factor ATF-1 (Activating, transcription factor 1) (TREB36 protein).]                                                                                                                                          | Go Component not found |
| P20061 | Transcobalamin-1 precursor (Transcobalamin I) (TCI) (TC I).                                                                                                                                                                                       | Go Component not found |

|        |                                                                                                                                                                                                                                                       |                        |
|--------|-------------------------------------------------------------------------------------------------------------------------------------------------------------------------------------------------------------------------------------------------------|------------------------|
| P20292 | [Arachidonate 5-lipoxygenase-activating protein (FLAP) (MK-886-binding, protein).]                                                                                                                                                                    | Go Component not found |
| P20810 | Calpastatin (Calpain inhibitor) (Sperm BS-17 component).                                                                                                                                                                                              | Go Component not found |
| P20839 | [Inosine-5'-monophosphate dehydrogenase 1 (EC 1.1.1.205) (IMP, dehydrogenase 1) (IMPDH-I) (IMPD 1).]                                                                                                                                                  | Go Component not found |
| P20853 | Cytochrome P450 2A7 (EC 1.14.14.1) (CYP1A7) (P450-IIA4).                                                                                                                                                                                              | Go Component not found |
| P21281 | [Vacuolar ATP synthase subunit B, brain isoform (EC 3.6.3.14) (V-ATPase, subunit B 2) (Vacuolar proton pump subunit B 2) (Endomembrane proton, pump 58 kDa subunit) (HO57).]                                                                          | Go Component not found |
| P21397 | [Amine oxidase [flavin-containing] A (EC 1.4.3.4) (Monoamine oxidase, type A) (MAO-A).]                                                                                                                                                               | Go Component not found |
| P42226 | Signal transducer and activator of transcription 6 (IL-4 Stat).                                                                                                                                                                                       | Go Component not found |
| P42285 | [Superkiller viralicidic activity 2-like 2 (EC 3.6.1.-) (ATP-dependent, helicase SKIV2L2).]                                                                                                                                                           | Go Component not found |
| P42338 | [Phosphatidylinositol-4,5-bisphosphate 3-kinase catalytic subunit beta, isoform (EC 2.7.1.153) (PI3-kinase p110 subunit beta) (PtdIns-3-kinase, p110) (PI3K) (PI3Kbeta).]                                                                             | Go Component not found |
| P42357 | Histidine ammonia-lyase (EC 4.3.1.3) (Histidase).                                                                                                                                                                                                     | Go Component not found |
| P42575 | [Caspase-2 precursor (EC 3.4.22.55) (CASP-2) (ICH-1 protease) (NEDD2, protein) (Neural precursor cell expressed developmentally down-regulated protein 2) (NEDD-2) [Contains: Caspase-2 subunit p18;, Caspase-2 subunit p13; Caspase-2 subunit p12].] | Go Component not found |
| P42679 | [Megakaryocyte-associated tyrosine-protein kinase (EC 2.7.10.2), (Tyrosine-protein kinase CTK) (Protein kinase HYL) (Hematopoietic, consensus tyrosine-lacking kinase).]                                                                              | Go Component not found |
| P42696 | RNA-binding protein 34 (RNA-binding motif protein 34).                                                                                                                                                                                                | Go Component not found |
| P42772 | [Cyclin-dependent kinase 4 inhibitor B (p14-INK4b) (p15-INK4b), (p15INK4B) (Multiple tumor suppressor 2) (MTS2).]                                                                                                                                     | Go Component not found |
| P43146 | [Netrin receptor DCC precursor (Tumor suppressor protein DCC), (Colorectal cancer suppressor).]                                                                                                                                                       | Go Component not found |
| P43304 | [Glycerol-3-phosphate dehydrogenase, mitochondrial precursor, (EC 1.1.99.5) (GPD-M) (GPDH-M) (mtGPD).]                                                                                                                                                | Go Component not found |
| P43353 | Aldehyde dehydrogenase 3B1 (EC 1.2.1.5) (Aldehyde dehydrogenase 7).                                                                                                                                                                                   | Go Component not found |
| P43360 | [Melanoma-associated antigen 6 (MAGE-6 antigen) (MAGE3B) (Cancer/testis, antigen 1.6) (CT1.6).]                                                                                                                                                       | Go Component not found |
| P43366 | [Melanoma-associated antigen B1 (MAGE-B1 antigen) (MAGE-XP antigen), (DSS-AHC critical interval MAGE superfamily 10) (DAM10) (Cancer/testis, antigen 3.1) (CT3.1).]                                                                                   | Go Component not found |
| P43490 | [Nicotinamide phosphoribosyltransferase (EC 2.4.2.12) (NAmpRTase), (Nampt) (Pre-B cell-enhancing factor) (Pre-B-cell colony-enhancing, factor 1) (Visfatin).]                                                                                         | Go Component not found |
| P45985 | [Dual specificity mitogen-activated protein kinase kinase 4, (EC 2.7.12.2) (MAP kinase kinase 4) (JNK-activating kinase 1) (c-Jun, N-terminal kinase kinase 1) (JNKK) (SAPK/ERK kinase 1) (SEK1).]                                                    | Go Component not found |
| P46020 | [Phosphorylase b kinase regulatory subunit alpha, skeletal muscle, isoform (Phosphorylase kinase alpha M subunit).]                                                                                                                                   | Go Component not found |
| P46379 | [Large proline-rich protein BAT3 (HLA-B-associated transcript 3), (Protein G3).]                                                                                                                                                                      | Go Component not found |
| P46597 | [Hydroxyindole O-methyltransferase (EC 2.1.1.4) (HIOMT), (Acetylserotonin O-methyltransferase) (ASMT).]                                                                                                                                               | Go Component not found |
| P46926 | [Glucosamine-6-phosphate isomerase (EC 3.5.99.6) (Glucosamine-6-, phosphate deaminase) (GNPDA) (GlcN6P deaminase) (Oscillin).]                                                                                                                        | Go Component not found |
| P46976 | Glycogenin-1 (EC 2.4.1.186).                                                                                                                                                                                                                          | Go Component not found |
| P47736 | Rap1 GTPase-activating protein 1 (Rap1GAP).                                                                                                                                                                                                           | Go Component not found |
| P47874 | Olfactory marker protein (Olfactory neuronal-specific protein).                                                                                                                                                                                       | Go Component not found |
| P47989 | [Xanthine dehydrogenase/oxidase [Includes: Xanthine dehydrogenase, (EC 1.1.7.1.4) (XD); Xanthine oxidase (EC 1.1.7.3.2) (XO) (Xanthine, oxidoreductase).]                                                                                             | Go Component not found |

|        |                                                                                                                                                                                                                                                  |                        |
|--------|--------------------------------------------------------------------------------------------------------------------------------------------------------------------------------------------------------------------------------------------------|------------------------|
| P48052 | Carboxypeptidase A2 precursor (EC 3.4.17.15).                                                                                                                                                                                                    | Go Component not found |
| P48506 | [Glutamate--cysteine ligase catalytic subunit (EC 6.3.2.2) (Gamma-, glutamylcysteine synthetase) (Gamma-ECS) (GCS heavy chain).]                                                                                                                 | Go Component not found |
| P48634 | Large proline-rich protein BAT2 (HLA-B-associated transcript 2).                                                                                                                                                                                 | Go Component not found |
| P48651 | [Phosphatidylserine synthase 1 (EC 2.7.8.-) (PtdSer synthase 1) (PSS-1), (Serine-exchange enzyme I).]                                                                                                                                            | Go Component not found |
| P48735 | [Isocitrate dehydrogenase [NADP], mitochondrial precursor (EC 1.1.1.42), (Oxalosuccinate decarboxylase) (IDH) (NADP(+)-specific ICDH) (IDP), (ICD-M).]                                                                                           | Go Component not found |
| P48764 | [Sodium/hydrogen exchanger 3 (Na(+)/H(+) exchanger 3) (NHE-3) (Solute, carrier family 9 member 3).]                                                                                                                                              | Go Component not found |
| P49591 | [Seryl-tRNA synthetase, cytoplasmic (EC 6.1.1.11) (Seryl-tRNA(Ser/Sec), synthetase) (Serine--tRNA ligase) (SerRS).]                                                                                                                              | Go Component not found |
| P49642 | [DNA primase small subunit (EC 2.7.7.-) (DNA primase 49 kDa subunit), (p49).]                                                                                                                                                                    | Go Component not found |
| P49703 | [ADP-ribosylation factor-like protein 4D (ADP-ribosylation factor-like, protein 4L).]                                                                                                                                                            | Go Component not found |
| P49716 | [CCAAT/enhancer-binding protein delta (C/EBP delta) (Nuclear factor NF-, IL6-beta) (NF-IL6-beta).]                                                                                                                                               | Go Component not found |
| P49746 | Thrombospondin-3 precursor.                                                                                                                                                                                                                      | Go Component not found |
| P49754 | Vacuolar protein sorting-associated protein 41 homolog (S53).                                                                                                                                                                                    | Go Component not found |
| P49760 | [Dual specificity protein kinase CLK2 (EC 2.7.12.1) (CDC-like kinase, 2).]                                                                                                                                                                       | Go Component not found |
| P49888 | [Estrogen sulfotransferase (EC 2.8.2.4) (Sulfotransferase, estrogen-, preferring) (EST-1).]                                                                                                                                                      | Go Component not found |
| P50479 | [PDZ and LIM domain protein 4 (LIM protein RIL) (Reversion-induced LIM, protein).]                                                                                                                                                               | Go Component not found |
| P51168 | [Amiloride-sensitive sodium channel subunit beta (Epithelial Na(+), channel subunit beta) (Beta-ENaC) (Nonvoltage-gated sodium channel 1, subunit beta) (SCNEB) (Beta-NaCh) (ENaCB).]                                                            | Go Component not found |
| P51589 | [Cytochrome P450 2J2 (EC 1.14.14.1) (CYPIIJ2) (Arachidonic acid, epoxygenase).]                                                                                                                                                                  | Go Component not found |
| P51692 | Signal transducer and activator of transcription 5B.                                                                                                                                                                                             | Go Component not found |
| P51786 | Zinc finger protein 157 (Zinc finger protein 22) (HZF22).                                                                                                                                                                                        | Go Component not found |
| P51813 | [Cytoplasmic tyrosine-protein kinase BMX (EC 2.7.10.2) (Bone marrow, tyrosine kinase gene in chromosome X protein) (Epithelial and, endothelial tyrosine kinase) (ETK) (NTK38).]                                                                 | Go Component not found |
| P51816 | [AF4/FMR2 family member 2 (Fragile X mental retardation 2 protein), (Protein FMR-2) (FMR2P) (Protein Ox19) (Fragile X E mental retardation, syndrome protein).]                                                                                  | Go Component not found |
| P51861 | Cerebellar degeneration-related antigen 1 (CDR34).                                                                                                                                                                                               | Go Component not found |
| P51959 | Cyclin-G1 (Cyclin-G).                                                                                                                                                                                                                            | Go Component not found |
| P52429 | [Diacylglycerol kinase epsilon (EC 2.7.1.107) (Diglyceride kinase, epsilon) (DGK-epsilon) (DAG kinase epsilon).]                                                                                                                                 | Go Component not found |
| P52736 | Zinc finger protein 133 (Zinc finger protein 150).                                                                                                                                                                                               | Go Component not found |
| P52746 | Zinc finger protein 142 (HA4654).                                                                                                                                                                                                                | Go Component not found |
| P52788 | [Spermine synthase (EC 2.5.1.22) (Spermidine aminopropyltransferase), (SPMSY).]                                                                                                                                                                  | Go Component not found |
| P52824 | [Diacylglycerol kinase theta (EC 2.7.1.107) (Diglyceride kinase theta), (DGK-theta) (DAG kinase theta).]                                                                                                                                         | Go Component not found |
| P52945 | [Pancreas/duodenum homeobox protein 1 (PDX-1) (Insulin promoter factor, 1) (IPF-1) (Islet/duodenum homeobox-1) (IDX-1) (Somatostatin-, transactivating factor 1) (STF-1) (Insulin upstream factor 1) (IUF-1), (Glucose-sensitive factor) (GSF).] | Go Component not found |
| P53004 | [Biliverdin reductase A precursor (EC 1.3.1.24) (Biliverdin-IX alpha-, reductase) (BVR A).]                                                                                                                                                      | Go Component not found |
| P53804 | [Tetratricopeptide repeat protein 3 (TPR repeat protein 3) (TPR repeat, protein D) (RING finger protein 105).]                                                                                                                                   | Go Component not found |
| P54793 | Arylsulfatase F precursor (EC 3.1.6.-) (ASF).                                                                                                                                                                                                    | Go Component not found |



|        |                                                                                                                                                                     |                        |
|--------|---------------------------------------------------------------------------------------------------------------------------------------------------------------------|------------------------|
| P54855 | [UDP-glucuronosyltransferase 2B15 precursor (EC 2.4.1.17) (UDPGT), (UDPGTh-3) (HLUG4).]                                                                             | Go Component not found |
| P54920 | [Alpha-soluble NSF attachment protein (SNAP-alpha) (N-ethylmaleimide-, sensitive factor attachment protein, alpha).]                                                | Go Component not found |
| P55039 | Developmentally-regulated GTP-binding protein 2 (DRG 2).                                                                                                            | Go Component not found |
| P55081 | Microfibrillar-associated protein 1.                                                                                                                                | Go Component not found |
| P55107 | [Bone morphogenetic protein 3b precursor (BMP-3b), (Growth/differentiation factor 10) (GDF-10) (Bone-inducing protein), (BIP).]                                     | Go Component not found |
| P55199 | [RNA polymerase II elongation factor ELL (Eleven-nineteen lysine-rich, leukemia protein).]                                                                          | Go Component not found |
| P55290 | [Cadherin-13 precursor (Truncated cadherin) (T-cadherin) (T-cad) (Heart, cadherin) (H-cadherin) (P105).]                                                            | Go Component not found |
| P55735 | Protein SEC13 homolog (SEC13-related protein) (SEC13-like protein 1).                                                                                               | Go Component not found |
| P55809 | [Succinyl-CoA:3-ketoacid-coenzyme A transferase 1, mitochondrial, precursor (EC 2.8.3.5) (Somatic-type succinyl CoA:3-oxoacid CoA-, transferase) (Scot-S).]         | Go Component not found |
| P56277 | [Protein p8 MTCP-1 (Mature T-cell proliferation-1 type A) (MTCP-1 type, A) (p8MTCP1).]                                                                              | Go Component not found |
| P56378 | 6.8 kDa mitochondrial proteolipid.                                                                                                                                  | Go Component not found |
| P56539 | Caveolin-3 (M-caveolin).                                                                                                                                            | Go Component not found |
| P56693 | Transcription factor SOX-10.                                                                                                                                        | Go Component not found |
| P56847 | Protein TNG2.                                                                                                                                                       | Go Component not found |
| P57056 | Putative uncharacterized protein C21orf32.                                                                                                                          | Go Component not found |
| P57073 | Transcription factor SOX-8.                                                                                                                                         | Go Component not found |
| P57082 | T-box transcription factor TBX4 (T-box protein 4).                                                                                                                  | Go Component not found |
| P57679 | Ellis-van Creveld syndrome protein (DWF-1).                                                                                                                         | Go Component not found |
| P57735 | Ras-related protein Rab-25 (CATX-8).                                                                                                                                | Go Component not found |
| P57764 | Gasdermin domain-containing protein 1.                                                                                                                              | Go Component not found |
| Q13449 | Limbic system-associated membrane protein precursor (LSAMP).                                                                                                        | Go Component not found |
| Q13562 | Neurogenic differentiation factor 1 (NeuroD1) (NeuroD).                                                                                                             | Go Component not found |
| Q13591 | Semaphorin-5A precursor (Semaphorin F) (Sema F).                                                                                                                    | Go Component not found |
| Q13617 | Cullin-2 (CUL-2).                                                                                                                                                   | Go Component not found |
| Q13620 | Cullin-4B (CUL-4B).                                                                                                                                                 | Go Component not found |
| Q13683 | [Integrin alpha-7 precursor [Contains: Integrin alpha-7 heavy chain;, Integrin alpha-7 light chain].]                                                               | Go Component not found |
| Q13751 | [Laminin subunit beta-3 precursor (Laminin 5 beta 3) (Laminin B1k, chain) (Kalinin B1 chain).]                                                                      | Go Component not found |
| Q13888 | [TFIIH basal transcription factor complex p44 subunit (Basic, transcription factor 2 44 kDa subunit) (BTF2-p44) (General, transcription factor IIH polypeptide 2).] | Go Component not found |
| Q13976 | [cGMP-dependent protein kinase 1, alpha isozyme (EC 2.7.11.12) (CGK 1, alpha) (cGKI-alpha).]                                                                        | Go Component not found |
| Q14011 | [Cold-inducible RNA-binding protein (Glycine-rich RNA-binding protein, CIRP) (A18 hnRNP).]                                                                          | Go Component not found |
| Q14094 | Cyclin-I.                                                                                                                                                           | Go Component not found |
| Q14141 | Septin-6.                                                                                                                                                           | Go Component not found |
| Q14147 | [Probable ATP-dependent RNA helicase DHX34 (EC 3.6.1.-) (DEAH box, protein 34).]                                                                                    | Go Component not found |
| Q14155 | [Rho guanine nucleotide exchange factor 7 (PAK-interacting exchange, factor beta) (Beta-Pix) (COOL-1) (p85).]                                                       | Go Component not found |
| Q14186 | [Transcription factor Dp-1 (E2F dimerization partner 1) (DRTF1-, polypeptide 1) (DRTF1).]                                                                           | Go Component not found |

|        |                                                                                                                                                                                    |                        |
|--------|------------------------------------------------------------------------------------------------------------------------------------------------------------------------------------|------------------------|
| Q14344 | Guanine nucleotide-binding protein alpha-13 subunit (G alpha-13).                                                                                                                  | Go Component not found |
| Q14500 | [ATP-sensitive inward rectifier potassium channel 12 (Potassium, channel, inwardly rectifying subfamily J member 12) (Inward rectifier, K(+)<br>channel Kir2.2) (Kir2.2v) (IRK2).] | Go Component not found |
| Q14541 | Hepatocyte nuclear factor 4-gamma (HNF-4-gamma).                                                                                                                                   | Go Component not found |
| Q14582 | [Max-interacting transcriptional repressor MAD4 (Max-associated protein, 4) (MAX dimerization protein 4).]                                                                         | Go Component not found |
| Q14586 | Zinc finger protein 267 (Zinc finger protein 2) (HZF2).                                                                                                                            | Go Component not found |
| Q14669 | [Probable E3 ubiquitin-protein ligase TRIP12 (EC 6.3.2.-) (Thyroid, receptor-interacting protein 12) (TRIP-12).]                                                                   | Go Component not found |
| Q14689 | Disco-interacting protein 2 homolog A.                                                                                                                                             | Go Component not found |
| Q14721 | [Potassium voltage-gated channel subfamily B member 1 (Voltage-gated, potassium channel subunit Kv2.1) (h-DRK1).]                                                                  | Go Component not found |
| Q15031 | [Probable leucyl-tRNA synthetase, mitochondrial precursor (EC 6.1.1.4), (Leucine--tRNA ligase) (LeuRS).]                                                                           | Go Component not found |
| Q15040 | Josephin-1 (Josephin domain-containing 1).                                                                                                                                         | Go Component not found |
| Q15050 | Ribosome biogenesis regulatory protein homolog.                                                                                                                                    | Go Component not found |
| Q15116 | [Programmed cell death protein 1 precursor (Protein PD-1) (hPD-1), (CD279 antigen).]                                                                                               | Go Component not found |
| Q15131 | [Cell division protein kinase 10 (EC 2.7.11.22) (Serine/threonine-, protein kinase PISSLRE).]                                                                                      | Go Component not found |
| Q15269 | Periodic tryptophan protein 2 homolog.                                                                                                                                             | Go Component not found |
| Q15319 | [POU domain, class 4, transcription factor 3 (Brain-specific, homeobox/POU domain protein 3C) (Brn-3C).]                                                                           | Go Component not found |
| Q15375 | [Ephrin type-A receptor 7 precursor (EC 2.7.10.1) (Tyrosine-protein, kinase receptor EHK-3) (EPH homology kinase 3) (Receptor protein-,<br>tyrosine kinase HEK11).]                | Go Component not found |
| Q15475 | Homeobox protein SIX1 (Sine oculis homeobox homolog 1).                                                                                                                            | Go Component not found |
| Q15561 | [Transcriptional enhancer factor TEF-3 (TEA domain family member 4), (TEAD-4) (Transcription factor RTEF-1).]                                                                      | Go Component not found |
| Q15744 | CCAAT/enhancer-binding protein epsilon (C/EBP epsilon).                                                                                                                            | Go Component not found |
| Q15759 | [Mitogen-activated protein kinase 11 (EC 2.7.11.24) (Mitogen-activated, protein kinase p38 beta) (MAP kinase p38 beta) (p38b) (p38-2) (Stress-,<br>activated protein kinase 2).]   | Go Component not found |
| Q15776 | [Zinc finger protein 192 (LD5-1) (Zinc finger protein with KRAB and, SCAN domains 8).]                                                                                             | Go Component not found |
| Q15818 | Neuronal pentraxin-1 precursor (NP1) (Neuronal pentraxin I) (NP-I).                                                                                                                | Go Component not found |
| Q15884 | Uncharacterized protein C9orf61 (Protein X123).                                                                                                                                    | Go Component not found |
| Q16342 | [Programmed cell death protein 2 (Zinc finger protein Rp-8) (Zinc, finger MYND domain-containing protein 7).]                                                                      | Go Component not found |
| Q16513 | [Serine/threonine-protein kinase N2 (EC 2.7.11.13) (Protein kinase C-, like 2) (Protein-kinase C-related kinase 2).]                                                               | Go Component not found |
| Q16587 | Zinc finger protein 74 (hZNF7).                                                                                                                                                    | Go Component not found |
| Q16600 | Zinc finger protein 239 (Zinc finger protein MOK-2) (HOK-2).                                                                                                                       | Go Component not found |
| Q16678 | Cytochrome P450 1B1 (EC 1.14.14.1) (CYPIB1).                                                                                                                                       | Go Component not found |
| Q16763 | [Ubiquitin-conjugating enzyme E2 S (EC 6.3.2.19) (Ubiquitin-protein, ligase S) (Ubiquitin carrier protein S) (Ubiquitin-conjugating enzyme, E2-24<br>kDa) (E2-EPPF5).]             | Go Component not found |
| Q16881 | [Thioredoxin reductase 1, cytoplasmic precursor (EC 1.8.1.9) (TR), (TR1).]                                                                                                         | Go Component not found |
| Q6P597 | Kinesin light chain 3 (kinesin light chain 2) (KLC2-like).                                                                                                                         | Go Component not found |
| Q92466 | [DNA damage-binding protein 2 (Damage-specific DNA-binding protein 2), (DDB p48 subunit) (DDBb) (UV-damaged DNA-binding protein 2) (UV-<br>DDB, 2).]                               | Go Component not found |

|        |                                                                                                                                                                                                                                                                                                                                                                                                                                                          |                        |
|--------|----------------------------------------------------------------------------------------------------------------------------------------------------------------------------------------------------------------------------------------------------------------------------------------------------------------------------------------------------------------------------------------------------------------------------------------------------------|------------------------|
| Q92526 | [T-complex protein 1 subunit zeta-2 (TCP-1-zeta-2) (CCT-zeta-2) (TCP-1-, zeta-like) (CCT-zeta-like) (Testis-specific Tcp20) (Testis-specific, protein TSA303).]                                                                                                                                                                                                                                                                                          | Go Component not found |
| Q92543 | Sorting nexin-19.                                                                                                                                                                                                                                                                                                                                                                                                                                        | Go Component not found |
| Q92569 | [Phosphatidylinositol 3-kinase regulatory subunit gamma (PI3-kinase p85, subunit gamma) (PtdIns-3-kinase p85-gamma) (p55PIK).]                                                                                                                                                                                                                                                                                                                           | Go Component not found |
| Q92609 | TBC1 domain family member 5.                                                                                                                                                                                                                                                                                                                                                                                                                             | Go Component not found |
| Q92618 | Zinc finger protein 516.                                                                                                                                                                                                                                                                                                                                                                                                                                 | Go Component not found |
| Q92664 | Transcription factor IIIA (Factor A) (TFIIIA).                                                                                                                                                                                                                                                                                                                                                                                                           | Go Component not found |
| Q92674 | [Centromere protein I (CENP-I) (Interphase centromere complex protein, 19) (Follicle-stimulating hormone primary response protein) (FSH, primary response protein 1) (Leucine-rich primary response protein 1).]                                                                                                                                                                                                                                         | Go Component not found |
| Q92781 | 11-cis retinol dehydrogenase (EC 1.1.1.105) (11-cis RDH).                                                                                                                                                                                                                                                                                                                                                                                                | Go Component not found |
| Q92786 | Homeobox prospero-like protein PROX1 (PROX 1).                                                                                                                                                                                                                                                                                                                                                                                                           | Go Component not found |
| Q92828 | Coronin-2A (WD repeat-containing protein 2) (IR10).                                                                                                                                                                                                                                                                                                                                                                                                      | Go Component not found |
| Q92833 | Protein Jumonji (Jumonji/ARID domain-containing protein 2).                                                                                                                                                                                                                                                                                                                                                                                              | Go Component not found |
| Q92851 | [Caspase-10 precursor (EC 3.4.22.63) (CASP-10) (ICE-like apoptotic, protease 4) (Apoptotic protease Mch-4) (FAS-associated death domain, protein interleukin-1B-converting enzyme 2) (FLICE2) [Contains:, Caspase-10 subunit p23/17; Caspase-10 subunit p12].]                                                                                                                                                                                           | Go Component not found |
| O75962 | [Triple functional domain protein (EC 2.7.11.1) (PTPRF-interacting, protein).]                                                                                                                                                                                                                                                                                                                                                                           | Go Component not found |
| O76039 | [Cyclin-dependent kinase-like 5 (EC 2.7.11.22) (Serine/threonine-, protein kinase 9).]                                                                                                                                                                                                                                                                                                                                                                   | Go Component not found |
| O76074 | [cGMP-specific 3',5'-cyclic phosphodiesterase (EC 3.1.4.35) (CGB-PDE), (cGMP-binding cGMP-specific phosphodiesterase).]                                                                                                                                                                                                                                                                                                                                  | Go Component not found |
| O94808 | [Glucosamine--fructose-6-phosphate aminotransferase [isomerizing] 2, (EC 2.6.1.16) (Glutamine:fructose 6 phosphate amidotransferase 2), (Hexosephosphate aminotransferase 2) (D-fructose-6-phosphate, amidotransferase 2) (GFAT 2) (GFAT2).]                                                                                                                                                                                                             | Go Component not found |
| O94822 | Zinc finger protein 294 (RING finger protein 160).                                                                                                                                                                                                                                                                                                                                                                                                       | Go Component not found |
| O94933 | SLIT and NTRK-like protein 3 precursor.                                                                                                                                                                                                                                                                                                                                                                                                                  | Go Component not found |
| O94967 | WD repeat-containing protein 47.                                                                                                                                                                                                                                                                                                                                                                                                                         | Go Component not found |
| O95006 | [Olfactory receptor 2F2 (Olfactory receptor OR7-6) (Olfactory receptor, 7-1) (OR7-1).]                                                                                                                                                                                                                                                                                                                                                                   | Go Component not found |
| O95047 | Olfactory receptor 2A4 (Olfactory receptor OR6-37).                                                                                                                                                                                                                                                                                                                                                                                                      | Go Component not found |
| O95104 | [Splicing factor, arginine/serine-rich 15 (CTD-binding SR-like protein, RA4).]                                                                                                                                                                                                                                                                                                                                                                           | Go Component not found |
| O95294 | RasGAP-activating-like protein 1.                                                                                                                                                                                                                                                                                                                                                                                                                        | Go Component not found |
| O95340 | [Bifunctional 3'-phosphoadenosine 5'-phosphosulfate synthetase 2 (PAPS, synthetase 2) (PAPSS 2) (Sulfurylase kinase 2) (SK2) (SK 2) [Includes:, Sulfate adenylyltransferase (EC 2.7.7.4) (Sulfate adenylyltransferase) (SAT) (ATP-sulfurylase); Adenylyl-sulfate kinase, (EC 2.7.1.25) (Adenylylsulfate 3'-phosphotransferase) (APS kinase), (Adenosine-5'-phosphosulfate 3'-phosphotransferase) (3'-, phosphoadenosine-5'-phosphosulfate synthetase)].] | Go Component not found |
| O95390 | [Growth/differentiation factor 11 precursor (GDF-11) (Bone, morphogenetic protein 11).]                                                                                                                                                                                                                                                                                                                                                                  | Go Component not found |
| O95416 | Transcription factor SOX-14.                                                                                                                                                                                                                                                                                                                                                                                                                             | Go Component not found |
| O95450 | [ADAMTS-2 precursor (EC 3.4.24.14) (A disintegrin and metalloproteinase, with thrombospondin motifs 2) (ADAM-TS 2) (ADAM-TS2) (Procollagen I/II, amino propeptide-processing enzyme) (Procollagen I N-proteinase) (PC, I-NP) (Procollagen N-endopeptidase) (pNPI).]                                                                                                                                                                                      | Go Component not found |
| O95498 | [Vascular non-inflammatory molecule 2 precursor (Vanin-2), (Glycosylphosphatidyl inositol-anchored protein GPI-80) (Protein FOAP-, 4).]                                                                                                                                                                                                                                                                                                                  | Go Component not found |

|        |                                                                                                                                                                                                                                                                                                                                     |                        |
|--------|-------------------------------------------------------------------------------------------------------------------------------------------------------------------------------------------------------------------------------------------------------------------------------------------------------------------------------------|------------------------|
| O95573 | [Long-chain-fatty-acid--CoA ligase 3 (EC 6.2.1.3) (Long-chain acyl-CoA, synthetase 3) (LACS 3).]                                                                                                                                                                                                                                    | Go Component not found |
| O95622 | [Adenylate cyclase type 5 (EC 4.6.1.1) (Adenylate cyclase type V) (ATP, pyrophosphate-lyase 5) (Adenyllyl cyclase 5).]                                                                                                                                                                                                              | Go Component not found |
| O95741 | Copine-6 (Copine VI) (Neuronal-copine) (N-copine).                                                                                                                                                                                                                                                                                  | Go Component not found |
| O95865 | [N(G),N(G)-dimethylarginine dimethylaminohydrolase 2 (EC 3.5.3.18), (Dimethylargininase-2) (Dimethylarginine dimethylaminohydrolase 2), (DDAHII) (DDAH-2) (S-phase protein) (Protein G6a).]                                                                                                                                         | Go Component not found |
| O95948 | [One cut domain family member 2 (Transcription factor ONECUT-2) (OC-2), (Hepatocyte nuclear factor 6-beta) (HNF-6-beta).]                                                                                                                                                                                                           | Go Component not found |
| P25686 | [DnaJ homolog subfamily B member 2 (Heat shock 40 kDa protein 3) (DnaJ, protein homolog 1) (HSJ-1).]                                                                                                                                                                                                                                | Go Component not found |
| P00390 | [Glutathione reductase, mitochondrial precursor (EC 1.8.1.7) (GR), (GRase).]                                                                                                                                                                                                                                                        | Go Component not found |
| P00739 | Haptoglobin-related protein precursor.                                                                                                                                                                                                                                                                                              | Go Component not found |
| P00746 | [Complement factor D precursor (EC 3.4.21.46) (C3 convertase activator), (Properdin factor D) (Adipsin).]                                                                                                                                                                                                                           | Go Component not found |
| P00750 | [Tissue-type plasminogen activator precursor (EC 3.4.21.68) (tPA) (t-, PA) (t-plasminogen activator) (Alteplase) (Retelase) [Contains:, Tissue-type plasminogen activator chain A; Tissue-type plasminogen, activator chain B].]                                                                                                    | Go Component not found |
| P00813 | Adenosine deaminase (EC 3.5.4.4) (Adenosine aminohydrolase).                                                                                                                                                                                                                                                                        | Go Component not found |
| P01024 | [Complement C3 precursor [Contains: Complement C3 beta chain;, Complement C3 alpha chain; C3a anaphylatoxin; Complement C3b alpha', chain; Complement C3c alpha' chain fragment 1; Complement C3dg, fragment; Complement C3g fragment; Complement C3d fragment; Complement, C3f fragment; Complement C3c alpha' chain fragment 2].] | Go Component not found |
| P01286 | [Somatoliberin precursor (Growth hormone-releasing factor) (GRF), (Growth hormone-releasing hormone) (GHRH) (Somatocrinin) (Somatorelin), (Sermorelin).]                                                                                                                                                                            | Go Component not found |
| P01350 | [Gastrin precursor [Contains: Gastrin-71 (Gastrin component I);, Gastrin-52 (G52); Big gastrin (Gastrin-34) (G34) (Gastrin component, II); Gastrin (Gastrin-17) (G17) (Gastrin component III); Gastrin-14, (G14); Gastrin-6 (G6)].]                                                                                                 | Go Component not found |
| P01568 | Interferon alpha-21 precursor (Interferon alpha-F) (LeIF F).                                                                                                                                                                                                                                                                        | Go Component not found |
| P01842 | Ig lambda chain C regions.                                                                                                                                                                                                                                                                                                          | Go Component not found |
| P01912 | [HLA class II histocompatibility antigen, DR-1 beta chain precursor, (Clone P2-beta-3).]                                                                                                                                                                                                                                            | Go Component not found |
| P02452 | Collagen alpha-1(I) chain precursor (Alpha-1 type I collagen).                                                                                                                                                                                                                                                                      | Go Component not found |
| P02545 | Lamin-A/C (70 kDa lamin) (Renal carcinoma antigen NY-REN-32).                                                                                                                                                                                                                                                                       | Go Component not found |
| P03956 | [Interstitial collagenase precursor (EC 3.4.24.7) (Matrix, metalloproteinase-1) (MMP-1) (Fibroblast collagenase) [Contains: 22, kDa interstitial collagenase; 27 kDa interstitial collagenase].]                                                                                                                                    | Go Component not found |
| P03992 | [HLA class II histocompatibility antigen, DQB1*0602 beta chain, precursor (DQ(5)) (DC-1).]                                                                                                                                                                                                                                          | Go Component not found |
| P04053 | [DNA nucleotidylexotransferase (EC 2.7.7.31) (Terminal addition enzyme), (Terminal deoxynucleotidyltransferase) (Terminal transferase).]                                                                                                                                                                                            | Go Component not found |
| P05013 | [Interferon alpha-6 precursor (Interferon alpha-K) (LeIF K) (Interferon, alpha-54).]                                                                                                                                                                                                                                                | Go Component not found |
| P05165 | [Propionyl-CoA carboxylase alpha chain, mitochondrial precursor, (EC 6.4.1.3) (PCCase subunit alpha) (Propanoyl-CoA:carbon dioxide, ligase subunit alpha).]                                                                                                                                                                         | Go Component not found |
| P05813 | [Beta-crystallin A3 [Contains: Beta-crystallin A3, isoform A1, Delta4, form; Beta-crystallin A3, isoform A1, Delta7 form; Beta-crystallin A3,, isoform A1, Delta8 form].]                                                                                                                                                           | Go Component not found |
| P06241 | [Proto-oncogene tyrosine-protein kinase Fyn (EC 2.7.10.2) (p59-Fyn), (Protooncogene Syn) (SLK).]                                                                                                                                                                                                                                    | Go Component not found |
| P07101 | Tyrosine 3-monooxygenase (EC 1.14.16.2) (Tyrosine 3-hydroxylase) (TH).                                                                                                                                                                                                                                                              | Go Component not found |
| P07203 | [Glutathione peroxidase 1 (EC 1.11.1.9) (GSHPx-1) (GPx-1) (Cellular, glutathione peroxidase).]                                                                                                                                                                                                                                      | Go Component not found |

|        |                                                                                                                                                                                                                                                                                   |                        |
|--------|-----------------------------------------------------------------------------------------------------------------------------------------------------------------------------------------------------------------------------------------------------------------------------------|------------------------|
| P07686 | [Beta-hexosaminidase beta chain precursor (EC 3.2.1.52) (N-acetyl-beta-, glucosaminidase) (Beta-N-acetylhexosaminidase) (Hexosaminidase B), (Cervical cancer proto-oncogene 7 protein) (HCC-7) [Contains: Beta-, hexosaminidase beta-B chain; Beta-hexosaminidase beta-A chain].] | Go Component not found |
| P21695 | [Glycerol-3-phosphate dehydrogenase [NAD+], cytoplasmic (EC 1.1.1.8), (GPD-C) (GPDH-C).]                                                                                                                                                                                          | Go Component not found |
| P21781 | [Keratinocyte growth factor precursor (KGF) (Fibroblast growth factor, 7) (FGF-7) (HBGF-7).]                                                                                                                                                                                      | Go Component not found |
| P21815 | [Bone sialoprotein 2 precursor (Bone sialoprotein II) (BSP II) (Cell-, binding sialoprotein) (Integrin-binding sialoprotein).]                                                                                                                                                    | Go Component not found |
| P22004 | Bone morphogenetic protein 6 precursor (BMP-6).                                                                                                                                                                                                                                   | Go Component not found |
| P22087 | [rRNA 2'-O-methyltransferase fibrillar (EC 2.1.1.-) (34 kDa nucleolar, scleroderma antigen).]                                                                                                                                                                                     | Go Component not found |
| P22223 | Cadherin-3 precursor (Placental cadherin) (P-cadherin).                                                                                                                                                                                                                           | Go Component not found |
| P22304 | [Iduronate 2-sulfatase precursor (EC 3.1.6.13) (Alpha-L-iduronate, sulfate sulfatase) (Idursulfase) [Contains: Iduronate 2-sulfatase 42, kDa chain; Iduronate 2-sulfatase 14 kDa chain].]                                                                                         | Go Component not found |
| P22314 | Ubiquitin-activating enzyme E1 (A1S9 protein).                                                                                                                                                                                                                                    | Go Component not found |
| P22680 | [Cytochrome P450 7A1 (Cholesterol 7-alpha-monooxygenase) (CYPVII), (EC 1.14.13.17) (Cholesterol 7-alpha-hydroxylase).]                                                                                                                                                            | Go Component not found |
| P23229 | [Integrin alpha-6 precursor (VLA-6) (CD49f antigen) [Contains: Integrin, alpha-6 heavy chain; Integrin alpha-6 light chain].]                                                                                                                                                     | Go Component not found |
| P23515 | Oligodendrocyte-myelin glycoprotein precursor.                                                                                                                                                                                                                                    | Go Component not found |
| P23759 | Paired box protein Pax-7 (HUP1).                                                                                                                                                                                                                                                  | Go Component not found |
| P24592 | [Insulin-like growth factor-binding protein 6 precursor (IGFBP-6) (IBP-, 6) (IGF-binding protein 6).]                                                                                                                                                                             | Go Component not found |
| P24821 | [Tenascin precursor (TN) (Tenascin-C) (TN-C) (Hexabrachion), (Cytotactin) (Neuronectin) (GMEM) (JI) (Myotendinous antigen) (Glioma-, associated-extracellular matrix antigen) (GP 150-225).]                                                                                      | Go Component not found |
| P80108 | [Phosphatidylinositol-glycan-specific phospholipase D precursor, (EC 3.1.4.50) (PI-G PLD) (Glycoprotein phospholipase D) (Glycosyl-, phosphatidylinositol-specific phospholipase D).]                                                                                             | Go Component not found |
| P80108 | [Phosphatidylinositol-glycan-specific phospholipase D precursor, (EC 3.1.4.50) (PI-G PLD) (Glycoprotein phospholipase D) (Glycosyl-, phosphatidylinositol-specific phospholipase D).]                                                                                             | Go Component not found |
| P80108 | [Phosphatidylinositol-glycan-specific phospholipase D precursor, (EC 3.1.4.50) (PI-G PLD) (Glycoprotein phospholipase D) (Glycosyl-, phosphatidylinositol-specific phospholipase D).]                                                                                             | Go Component not found |
| P80108 | [Phosphatidylinositol-glycan-specific phospholipase D precursor, (EC 3.1.4.50) (PI-G PLD) (Glycoprotein phospholipase D) (Glycosyl-, phosphatidylinositol-specific phospholipase D).]                                                                                             | Go Component not found |
| P80108 | [Phosphatidylinositol-glycan-specific phospholipase D precursor, (EC 3.1.4.50) (PI-G PLD) (Glycoprotein phospholipase D) (Glycosyl-, phosphatidylinositol-specific phospholipase D).]                                                                                             | Go Component not found |
| P80108 | [Phosphatidylinositol-glycan-specific phospholipase D precursor, (EC 3.1.4.50) (PI-G PLD) (Glycoprotein phospholipase D) (Glycosyl-, phosphatidylinositol-specific phospholipase D).]                                                                                             | Go Component not found |
| P80108 | [Phosphatidylinositol-glycan-specific phospholipase D precursor, (EC 3.1.4.50) (PI-G PLD) (Glycoprotein phospholipase D) (Glycosyl-, phosphatidylinositol-specific phospholipase D).]                                                                                             | Go Component not found |
| P80108 | [Phosphatidylinositol-glycan-specific phospholipase D precursor, (EC 3.1.4.50) (PI-G PLD) (Glycoprotein phospholipase D) (Glycosyl-, phosphatidylinositol-specific phospholipase D).]                                                                                             | Go Component not found |
| P81274 | G-protein-signaling modulator 2 (Mosaic protein LGN).                                                                                                                                                                                                                             | Go Component not found |
| P26371 | [Keratin-associated protein 5-9 (Keratin-associated protein 5.9), (Ultrahigh sulfur keratin-associated protein 5.9) (Keratin, cuticle,, ultrahigh sulfur 1) (Keratin, ultra high-sulfur matrix protein A) (UHS, keratin A) (UHS KerA).]                                           | Go Component not found |
| P26927 | [Hepatocyte growth factor-like protein precursor (Macrophage, stimulatory protein) (MSP) (Macrophage-stimulating protein) [Contains:, Hepatocyte growth factor-like protein alpha chain; Hepatocyte growth, factor-like protein beta chain].]                                     | Go Component not found |

|        |                                                                                                                                                                                                                                                                                                          |                        |
|--------|----------------------------------------------------------------------------------------------------------------------------------------------------------------------------------------------------------------------------------------------------------------------------------------------------------|------------------------|
| P26998 | Beta-crystallin B3 (Beta-B3 crystallin).                                                                                                                                                                                                                                                                 | Go Component not found |
| P27144 | [Adenylate kinase isoenzyme 4, mitochondrial (EC 2.7.4.3) (Adenylate, kinase 3-like 1) (ATP-AMP transphosphorylase).]                                                                                                                                                                                    | Go Component not found |
| P27361 | [Mitogen-activated protein kinase 3 (EC 2.7.11.24) (Extracellular, signal-regulated kinase 1) (ERK-1) (Insulin-stimulated MAP2 kinase), (MAP kinase 1) (MAPK 1) (p44-ERK1) (ERT2) (p44-MAPK) (Microtubule-, associated protein 2 kinase).]                                                               | Go Component not found |
| P27708 | [CAD protein [Includes: Glutamine-dependent carbamoyl-phosphate, synthase (EC 6.3.5.5); Aspartate carbamoyltransferase (EC 2.1.3.2);, Dihydroorotase (EC 3.5.2.3).]                                                                                                                                      | Go Component not found |
| P28161 | [Glutathione S-transferase Mu 2 (EC 2.5.1.18) (GSTM2-2) (GST class-mu, 2).]                                                                                                                                                                                                                              | Go Component not found |
| P28300 | Protein-lysine 6-oxidase precursor (EC 1.4.3.13) (Lysyl oxidase).                                                                                                                                                                                                                                        | Go Component not found |
| P28332 | Alcohol dehydrogenase 6 (EC 1.1.1.1).                                                                                                                                                                                                                                                                    | Go Component not found |
| P28715 | [DNA-repair protein complementing XP-G cells (Xeroderma pigmentosum, group G-complementing protein) (DNA excision repair protein ERCC-5).]                                                                                                                                                               | Go Component not found |
| P29083 | [Transcription initiation factor IIE subunit alpha (TFIIE-alpha), (General transcription factor IIE subunit 1) (General transcription, factor IIE 56 kDa subunit).]                                                                                                                                      | Go Component not found |
| P30304 | [M-phase inducer phosphatase 1 (EC 3.1.3.48) (Dual specificity, phosphatase Cdc25A).]                                                                                                                                                                                                                    | Go Component not found |
| P30414 | [NK-tumor recognition protein (Natural-killer cells cyclophilin-related, protein) (NK-TR protein).]                                                                                                                                                                                                      | Go Component not found |
| P30505 | [HLA class I histocompatibility antigen, Cw-8 alpha chain precursor, (MHC class I antigen Cw*8).]                                                                                                                                                                                                        | Go Component not found |
| P31213 | [3-oxo-5-alpha-steroid 4-dehydrogenase 2 (EC 1.3.99.5) (Steroid 5-, alpha-reductase 2) (SR type 2) (5 alpha-SR2) (Type II 5-alpha, reductase).]                                                                                                                                                          | Go Component not found |
| P31271 | Homeobox protein Hox-A13 (Hox-1J).                                                                                                                                                                                                                                                                       | Go Component not found |
| P31323 | cAMP-dependent protein kinase type II-beta regulatory subunit.                                                                                                                                                                                                                                           | Go Component not found |
| P31689 | [DnaJ homolog subfamily A member 1 (Heat shock 40 kDa protein 4) (DnaJ, protein homolog 2) (HDJ-2) (HSJ-2) (HSDJ).]                                                                                                                                                                                      | Go Component not found |
| P31939 | [Bifunctional purine biosynthesis protein PURH [Includes:, Phosphoribosylaminoimidazolecarboxamide formyltransferase (EC 2.1.2.3), (5-aminoimidazole-4-carboxamide ribonucleotide formyltransferase), (AICAR transformylase); IMP cyclohydrolase (EC 3.5.4.10) (Inosinicase), (IMP synthetase) (ATIC)].] | Go Component not found |
| P32004 | Neural cell adhesion molecule L1 precursor (N-CAM L1) (CD171 antigen).                                                                                                                                                                                                                                   | Go Component not found |
| P32456 | [Interferon-induced guanylate-binding protein 2 (GTP-binding protein 2), (Guanine nucleotide-binding protein 2) (GBP-2) (HuGBP-2).]                                                                                                                                                                      | Go Component not found |
| P33764 | Protein S100-A3 (S100 calcium-binding protein A3) (Protein S-100E).                                                                                                                                                                                                                                      | Go Component not found |
| P34949 | [Mannose-6-phosphate isomerase (EC 5.3.1.8) (Phosphomannose isomerase), (PMI) (Phosphohexomutase).]                                                                                                                                                                                                      | Go Component not found |
| P35221 | [Catenin alpha-1 (Cadherin-associated protein) (Alpha E-catenin) (NY-, REN-13 antigen).]                                                                                                                                                                                                                 | Go Component not found |
| P35241 | Radixin.                                                                                                                                                                                                                                                                                                 | Go Component not found |
| P35442 | Thrombospondin-2 precursor.                                                                                                                                                                                                                                                                              | Go Component not found |
| P35475 | Alpha-L-iduronidase precursor (EC 3.2.1.76).                                                                                                                                                                                                                                                             | Go Component not found |
| P35503 | [UDP-glucuronosyltransferase 1-3 precursor (EC 2.4.1.17) (UDP-, glucuronosyltransferase 1A3) (UDPGT) (UGT1*3) (UGT1-03) (UGT1.3) (UGT-, 1C) (UGT1C).]                                                                                                                                                    | Go Component not found |
| P35558 | [Phosphoenolpyruvate carboxykinase, cytosolic [GTP] (EC 4.1.1.32), (Phosphoenolpyruvate carboxylase) (PEPCK-C).]                                                                                                                                                                                         | Go Component not found |
| P35626 | [Beta-adrenergic receptor kinase 2 (EC 2.7.11.15) (Beta-ARK-2) (G-, protein-coupled receptor kinase 3).]                                                                                                                                                                                                 | Go Component not found |
| P35711 | Transcription factor SOX-5.                                                                                                                                                                                                                                                                              | Go Component not found |

|        |                                                                                                                                                                   |                        |
|--------|-------------------------------------------------------------------------------------------------------------------------------------------------------------------|------------------------|
| P38935 | [DNA-binding protein SMUBP-2 (EC 3.6.1.-) (ATP-dependent helicase, IGHMBP2) (Immunoglobulin mu-binding protein 2) (SMUBP-2) (Glial factor, 1) (GF-1).]            | Go Component not found |
| P39880 | Homeobox protein cut-like 1 (CCAAT displacement protein) (CDP).                                                                                                   | Go Component not found |
| P40261 | Nicotinamide N-methyltransferase (EC 2.1.1.1).                                                                                                                    | Go Component not found |
| P41091 | [Eukaryotic translation initiation factor 2 subunit 3 (Eukaryotic, translation initiation factor 2 subunit gamma) (eIF-2-gamma).]                                 | Go Component not found |
| P41229 | [Histone demethylase JARID1C (EC 1.14.11.-) (Jumonji/ARID domain-, containing protein 1C) (Protein SmcX) (Protein Xe169).]                                        | Go Component not found |
| P58005 | Sestrin-3.                                                                                                                                                        | Go Component not found |
| P58166 | Inhibin beta E chain precursor (Activin beta-E chain).                                                                                                            | Go Component not found |
| P58335 | [Anthrax toxin receptor 2 precursor (Capillary morphogenesis gene 2, protein) (CMG-2).]                                                                           | Go Component not found |
| P60983 | Glia maturation factor beta (GMF-beta).                                                                                                                           | Go Component not found |
| P61024 | Cyclin-dependent kinases regulatory subunit 1 (CKS-1).                                                                                                            | Go Component not found |
| P61371 | Insulin gene enhancer protein ISL-1 (Islet-1).                                                                                                                    | Go Component not found |
| P61769 | [Beta-2-microglobulin precursor [Contains: Beta-2-microglobulin form pl, 5.3].]                                                                                   | Go Component not found |
| P61921 | [Hemoglobin subunit gamma-2 (Hemoglobin gamma-2 chain) (Gamma-2-globin), (Hemoglobin gamma-G chain).]                                                             | Go Component not found |
| P61981 | 14-3-3 protein gamma (Protein kinase C inhibitor protein 1) (KCIP-1).                                                                                             | Go Component not found |
| P62136 | [Serine/threonine-protein phosphatase PP1-alpha catalytic subunit, (EC 3.1.3.16) (PP-1A).]                                                                        | Go Component not found |
| P62508 | [Estrogen-related receptor gamma (Estrogen receptor-related protein 3), (ERR gamma-2).]                                                                           | Go Component not found |
| P62834 | [Ras-related protein Rap-1A precursor (GTP-binding protein smg-p21A), (Ras-related protein Krev-1) (C21KG) (G-22K).]                                              | Go Component not found |
| P69891 | [Hemoglobin subunit gamma-1 (Hemoglobin gamma-1 chain) (Gamma-1-globin), (Hemoglobin gamma-A chain) (Hb F Agamma).]                                               | Go Component not found |
| P78329 | [Cytochrome P450 4F2 (EC 1.14.13.30) (CYP1VF2) (Leukotriene-B(4) omega-, hydroxylase) (Leukotriene-B(4) 20-monooxygenase) (Cytochrome P450-LTB-, omega).]         | Go Component not found |
| P78368 | Casein kinase I isoform gamma-2 (EC 2.7.11.1) (CKI-gamma 2).                                                                                                      | Go Component not found |
| P78395 | [Melanoma antigen preferentially expressed in tumors (Preferentially, expressed antigen of melanoma) (OPA-interacting protein 4) (OIP4).]                         | Go Component not found |
| P78426 | Homeobox protein Nkx-6.1.                                                                                                                                         | Go Component not found |
| P78563 | [Double-stranded RNA-specific editase 1 (EC 3.5.-.-) (dsRNA adenosine, deaminase) (RNA-editing deaminase 1) (RNA-editing enzyme 1).]                              | Go Component not found |
| Q9BZQ6 | ER degradation-enhancing alpha-mannosidase-like 3.                                                                                                                | Go Component not found |
| Q9C005 | Dpy-30-like protein.                                                                                                                                              | Go Component not found |
| P82279 | Crumbs homolog 1 precursor.                                                                                                                                       | Go Component not found |
| Q01518 | Adenylyl cyclase-associated protein 1 (CAP 1).                                                                                                                    | Go Component not found |
| Q01638 | Interleukin-1 receptor-like 1 precursor (ST2 protein).                                                                                                            | Go Component not found |
| Q01804 | OTU domain-containing protein 4 (HIV-1-induced protein HIN-1).                                                                                                    | Go Component not found |
| Q02040 | [Splicing factor, arginine/serine-rich 17A (Protein XE7) (B-lymphocyte, antigen) (721P).]                                                                         | Go Component not found |
| Q02750 | [Dual specificity mitogen-activated protein kinase kinase 1, (EC 2.7.12.2) (MAP kinase kinase 1) (MAPKK 1) (ERK activator kinase 1), (MAPK/ERK kinase 1) (MEK1).] | Go Component not found |
| Q02962 | Paired box protein Pax-2.                                                                                                                                         | Go Component not found |

|        |                                                                                                                                                                                                                                  |                        |
|--------|----------------------------------------------------------------------------------------------------------------------------------------------------------------------------------------------------------------------------------|------------------------|
| Q03052 | [POU domain, class 3, transcription factor 1 (Octamer-binding, transcription factor 6) (Oct-6) (POU domain transcription factor, SCIP).]                                                                                         | Go Component not found |
| Q03113 | Guanine nucleotide-binding protein alpha-12 subunit (G alpha-12).                                                                                                                                                                | Go Component not found |
| Q03468 | [DNA excision repair protein ERCC-6 (EC 3.6.1.-) (ATP-dependent, helicase ERCC6) (Cockayne syndrome protein CSB).]                                                                                                               | Go Component not found |
| Q05086 | [Ubiquitin-protein ligase E3A (EC 6.3.2.-) (E6AP ubiquitin-protein, ligase) (Oncogenic protein-associated protein E6-AP) (Human, papillomavirus E6-associated protein) (Renal carcinoma antigen NY-REN-, 54).]                   | Go Component not found |
| Q05215 | Early growth response protein 4 (EGR-4) (AT133).                                                                                                                                                                                 | Go Component not found |
| Q05639 | [Elongation factor 1-alpha 2 (EF-1-alpha-2) (Elongation factor 1 A-2), (eEF1A-2) (Statin S1).]                                                                                                                                   | Go Component not found |
| Q05823 | [2-5A-dependent ribonuclease (EC 3.1.26.-) (2-5A-dependent RNase), (Ribonuclease L) (RNase L) (Ribonuclease 4).]                                                                                                                 | Go Component not found |
| Q06889 | Early growth response protein 3 (EGR-3) (Zinc finger protein pilot).                                                                                                                                                             | Go Component not found |
| Q08493 | [cAMP-specific 3',5'-cyclic phosphodiesterase 4C (EC 3.1.4.17) (DPDE1), (PDE21).]                                                                                                                                                | Go Component not found |
| Q10586 | [D site-binding protein (Albumin D box-binding protein) (Albumin D-, element-binding protein) (TAXREB302).]                                                                                                                      | Go Component not found |
| Q12767 | Uncharacterized protein KIAA0195 (Transmembrane protein 94).                                                                                                                                                                     | Go Component not found |
| Q12872 | [Splicing factor, arginine/serine-rich 8 (Suppressor of white apricot, protein homolog).]                                                                                                                                        | Go Component not found |
| Q12899 | [Tripartite motif-containing protein 26 (Zinc finger protein 173) (Acid, finger protein) (AFP) (RING finger protein 95).]                                                                                                        | Go Component not found |
| Q12923 | [Tyrosine-protein phosphatase non-receptor type 13 (EC 3.1.3.48), (Protein-tyrosine phosphatase 1E) (PTP-E1) (hPTPE1) (PTP-BAS), (Protein-tyrosine phosphatase PTPL1) (Fas-associated protein-tyrosine, phosphatase 1) (FAP-1).] | Go Component not found |
| Q12933 | [TNF receptor-associated factor 2 (Tumor necrosis factor type 2, receptor-associated protein 3).]                                                                                                                                | Go Component not found |
| Q12979 | Active breakpoint cluster region-related protein.                                                                                                                                                                                | Go Component not found |
| Q13007 | [Interleukin-24 precursor (Suppression of tumorigenicity 16 protein), (Melanoma differentiation-associated gene 7 protein) (MDA-7).]                                                                                             | Go Component not found |
| Q13075 | [Baculoviral IAP repeat-containing protein 1 (Neuronal apoptosis, inhibitory protein).]                                                                                                                                          | Go Component not found |
| Q13098 | [COP9 signalosome complex subunit 1 (Signalosome subunit 1) (SGN1), (JAB1-containing signalosome subunit 1) (G protein pathway suppressor, 1) (Protein GPS1) (Protein MFH).]                                                     | Go Component not found |
| Q13163 | [Dual specificity mitogen-activated protein kinase kinase 5, (EC 2.7.12.2) (MAP kinase kinase 5) (MAPKK 5) (MAPK/ERK kinase 5).]                                                                                                 | Go Component not found |
| Q13191 | [E3 ubiquitin-protein ligase CBL-B (EC 6.3.2.-) (Signal transduction, protein CBL-B) (SH3-binding protein CBL-B) (Casitas B-lineage lymphoma, proto-oncogene b) (RING finger protein 56).]                                       | Go Component not found |
| Q13206 | [Probable ATP-dependent RNA helicase DDX10 (EC 3.6.1.-) (DEAD box, protein 10).]                                                                                                                                                 | Go Component not found |
| Q13227 | G protein pathway suppressor 2 (Protein GPS2).                                                                                                                                                                                   | Go Component not found |
| Q13237 | [cGMP-dependent protein kinase 2 (EC 2.7.11.12) (CGK 2) (cGKII) (Type, II cGMP-dependent protein kinase).]                                                                                                                       | Go Component not found |
| Q13330 | Metastasis-associated protein MTA1.                                                                                                                                                                                              | Go Component not found |
| Q13351 | [Krueppel-like factor 1 (Erythroid krueppel-like transcription factor), (EKLF) (Erythroid transcription factor).]                                                                                                                | Go Component not found |
| Q13370 | [cGMP-inhibited 3',5'-cyclic phosphodiesterase B (EC 3.1.4.17) (Cyclic, GMP-inhibited phosphodiesterase B) (CGI-PDE B) (CGIPDE1) (CGIP1).]                                                                                       | Go Component not found |
| Q92989 | Pre-mRNA cleavage complex II protein Clp1.                                                                                                                                                                                       | Go Component not found |
| Q92995 | [Ubiquitin carboxyl-terminal hydrolase 13 (EC 3.1.2.15) (Ubiquitin, thioesterase 13) (Ubiquitin-specific-processing protease 13), (Deubiquitinating enzyme 13) (Isopeptidase T-3) (ISOT-3).]                                     | Go Component not found |
| Q93075 | TatD DNase domain-containing deoxyribonuclease 2 (EC 3.1.21.-).                                                                                                                                                                  | Go Component not found |
| Q93088 | Betaine--homocysteine S-methyltransferase 1 (EC 2.1.1.5).                                                                                                                                                                        | Go Component not found |



|        |                                                                                                                                                                                       |                        |
|--------|---------------------------------------------------------------------------------------------------------------------------------------------------------------------------------------|------------------------|
| Q95604 | [HLA class I histocompatibility antigen, Cw-17 alpha chain precursor, (MHC class I antigen Cw*17).]                                                                                   | Go Component not found |
| Q96NI6 | [Leucine-rich repeat and fibronectin type-III domain-containing protein, 5 precursor.]                                                                                                | Go Component not found |
| Q99487 | [Platelet-activating factor acetylhydrolase 2, cytoplasmic, (EC 3.1.1.47) (Serine-dependent phospholipase A2) (HSD-PLA2).]                                                            | Go Component not found |
| Q99518 | [Dimethylaniline monooxygenase [N-oxide-forming] 2 (EC 1.14.13.8), (Pulmonary flavin-containing monooxygenase 2) (FMO 2) (Dimethylaniline, oxidase 2) (FMO 1B1).]                     | Go Component not found |
| Q99574 | Neuroserpin precursor (Serp11) (Protease inhibitor 12).                                                                                                                               | Go Component not found |
| Q99611 | [Selenide, water dikinase 2 (EC 2.7.9.3) (Selenophosphate synthetase 2), (Selenium donor protein 2).]                                                                                 | Go Component not found |
| Q99684 | [Zinc finger protein Gfi-1 (Growth factor independent protein 1) (Zinc, finger protein 163).]                                                                                         | Go Component not found |
| Q99743 | [Neuronal PAS domain-containing protein 2 (Neuronal PAS2) (Member of, PAS protein 4) (Basic-helix-loop-helix-PAS protein MOP4).]                                                      | Go Component not found |
| Q99865 | [Spindlin-2A (Spindlin-like protein 2A) (SPIN-2A) (SPIN-2) (Protein, DXF34).]                                                                                                         | Go Component not found |
| Q99935 | [Proline-rich protein 1 precursor (PRL1) (Basic proline-rich lacrimal, protein).]                                                                                                     | Go Component not found |
| Q99961 | [SH3-containing GRB2-like protein 1 (Endophilin-2) (Endophilin-A2) (SH3, domain protein 2B) (Extra eleven-nineteen leukemia fusion gene, protein) (EEN) (EEN fusion partner of MLL).] | Go Component not found |
| Q9BPZ7 | [Stress-activated map kinase-interacting protein 1 (SAPK-interacting, protein 1) (Putative Ras inhibitor JC310).]                                                                     | Go Component not found |
| Q9BSY9 | UPF0326 protein C1orf121.                                                                                                                                                             | Go Component not found |
| Q9BU70 | Nef-associated protein 1 (EC 3.1.2.-) (Thioesterase NAP1).                                                                                                                            | Go Component not found |
| Q9BXT8 | RING finger protein 17.                                                                                                                                                               | Go Component not found |
| Q9H1E3 | Nuclear ubiquitous casein and cyclin-dependent kinases substrate (P1).                                                                                                                | Go Component not found |
| Q9H4B7 | Tubulin beta-1 chain.                                                                                                                                                                 | Go Component not found |
| Q9H4W6 | [Transcription factor COE3 (Early B-cell factor 3) (EBF-3) (Olf-1/EBF-, like 2) (OE-2) (O/E-2).]                                                                                      | Go Component not found |
| Q9H9Y6 | [DNA-directed RNA polymerase I subunit RPA2 (EC 2.7.7.6) (RNA, polymerase I subunit 2) (DNA-directed RNA polymerase I 135 kDa, polypeptide) (RPA135).]                                | Go Component not found |
| Q9HCL2 | [Glycerol-3-phosphate acyltransferase, mitochondrial precursor, (EC 2.3.1.15) (GPAT).]                                                                                                | Go Component not found |
| Q9NQ11 | Probable cation-transporting ATPase 13A2 (EC 3.6.3.-).                                                                                                                                | Go Component not found |
| Q9NQV7 | PR domain zinc finger protein 9 (PR domain-containing protein 9).                                                                                                                     | Go Component not found |
| Q9NQX3 | Gephyrin.                                                                                                                                                                             | Go Component not found |
| Q9NR09 | [Baculoviral IAP repeat-containing protein 6 (Ubiquitin-conjugating BIR, domain enzyme apollon).]                                                                                     | Go Component not found |
| Q9NRC9 | [Otoraplin precursor (Fibrocyte-derived protein) (Melanoma inhibitory, activity-like protein).]                                                                                       | Go Component not found |
| Q9NSE2 | [Cytokine-inducible SH2-containing protein (CIS) (CIS-1) (Suppressor of, cytokine signaling) (SOCS) (Protein G18).]                                                                   | Go Component not found |
| Q9NSV4 | Protein diaphanous homolog 3 (Diaphanous-related formin-3) (DRF3).                                                                                                                    | Go Component not found |
| Q9NUA8 | Zinc finger and BTB domain-containing protein 40.                                                                                                                                     | Go Component not found |
| Q9NVP1 | [ATP-dependent RNA helicase DDX18 (EC 3.6.1.-) (DEAD box protein 18), (Myc-regulated DEAD box protein) (MrDb).]                                                                       | Go Component not found |
| Q9NY30 | Protein BTG4 (PC3b).                                                                                                                                                                  | Go Component not found |
| Q9NY65 | Tubulin alpha-8 chain (Alpha-tubulin 8).                                                                                                                                              | Go Component not found |
| Q9NZ56 | Formin-2.                                                                                                                                                                             | Go Component not found |
| Q9NZL3 | [Zinc finger protein 224 (Zinc finger protein 27) (Zinc finger protein, 233) (Zinc finger protein 255) (Bone marrow zinc finger 2) (BMZF-2), (Zinc finger protein KOX22).]            | Go Component not found |

|        |                                                                                                                                                                                                                                                            |                        |
|--------|------------------------------------------------------------------------------------------------------------------------------------------------------------------------------------------------------------------------------------------------------------|------------------------|
| Q9P0K8 | Forkhead box protein J2 (Fork head homologous X).                                                                                                                                                                                                          | Go Component not found |
| Q9P2G3 | Kelch-like protein 14.                                                                                                                                                                                                                                     | Go Component not found |
| Q9P2K6 | Kelch domain-containing protein 5.                                                                                                                                                                                                                         | Go Component not found |
| Q9P2Q2 | FERM domain-containing protein 4A.                                                                                                                                                                                                                         | Go Component not found |
| Q9UBK7 | Rab-like protein 2A.                                                                                                                                                                                                                                       | Go Component not found |
| Q9UBQ6 | [Exostosin-like 2 (EC 2.4.1.223) (Glucuronyl-galactosyl-proteoglycan 4-, alpha-N-acetylglucosaminyltransferase) (Alpha-1,4-N-, acetylhexosaminyltransferase EXTL2) (Alpha-GalNAcT EXTL2) (EXT-related, protein 2) [Contains: Processed exostosin-like 2].] | Go Component not found |
| Q9UBT3 | [Dickkopf-related protein 4 precursor (Dkk-4) (Dickkopf-4) (hDkk-4), [Contains: Dickkopf-related protein 4 short form].]                                                                                                                                   | Go Component not found |
| Q9UBW7 | [MYM-type zinc finger protein 2 (Zinc finger protein 198) (Fused in, myeloproliferative disorders protein) (Rearranged in atypical, myeloproliferative disorder protein).]                                                                                 | Go Component not found |
| Q9UGL9 | Protein NICE-1.                                                                                                                                                                                                                                            | Go Component not found |
| Q9UH64 | Susceptibility protein NSG-x.                                                                                                                                                                                                                              | Go Component not found |
| Q9UH18 | [ADAMTS-1 precursor (EC 3.4.24.-) (A disintegrin and metalloproteinase, with thrombospondin motifs 1) (ADAM-TS 1) (ADAM-TS1) (METH-1).]                                                                                                                    | Go Component not found |
| Q9UHY8 | Fasciculation and elongation protein zeta 2 (Zygin-2) (Zygin II).                                                                                                                                                                                          | Go Component not found |
| Q9UI43 | [Putative ribosomal RNA methyltransferase 2 (EC 2.1.1.-) (rRNA, (uridine-2'-O-)-methyltransferase).]                                                                                                                                                       | Go Component not found |
| Q9UIV8 | [Serpine B13 (Harpin) (HaCaT UV-repressible serpin) (Proteinase, inhibitor 13) (Headpin).]                                                                                                                                                                 | Go Component not found |
| Q9UJF2 | Ras GTPase-activating protein nGAP (RAS protein activator-like 1).                                                                                                                                                                                         | Go Component not found |
| Q9UK10 | Zinc finger protein 225.                                                                                                                                                                                                                                   | Go Component not found |
| Q9UK13 | Zinc finger protein 221.                                                                                                                                                                                                                                   | Go Component not found |
| Q9UK99 | F-box only protein 3.                                                                                                                                                                                                                                      | Go Component not found |
| Q9UKJ8 | [ADAM 21 precursor (EC 3.4.24.-) (A disintegrin and metalloproteinase, domain 21).]                                                                                                                                                                        | Go Component not found |
| Q9UKN5 | PR domain zinc finger protein 4 (PR domain-containing protein 4).                                                                                                                                                                                          | Go Component not found |
| Q9UKP5 | [ADAMTS-6 precursor (EC 3.4.24.-) (A disintegrin and metalloproteinase, with thrombospondin motifs 6) (ADAM-TS 6) (ADAM-TS6).]                                                                                                                             | Go Component not found |
| Q9UL15 | [BAG family molecular chaperone regulator 5 (Bcl-2-associated, athanogene 5) (BAG-5).]                                                                                                                                                                     | Go Component not found |
| Q9ULC6 | [Protein-arginine deiminase type-1 (EC 3.5.3.15) (Protein-arginine, deiminase type I) (Peptidylarginine deiminase I).]                                                                                                                                     | Go Component not found |
| Q9ULJ3 | [Zinc finger protein 295 (Zinc finger and BTB domain-containing protein, 21).]                                                                                                                                                                             | Go Component not found |
| Q9ULS5 | Transmembrane and coiled-coil domains protein 3.                                                                                                                                                                                                           | Go Component not found |
| Q9ULW8 | [Protein-arginine deiminase type-3 (EC 3.5.3.15) (Protein-arginine, deiminase type III) (Peptidylarginine deiminase III).]                                                                                                                                 | Go Component not found |
| Q9UM07 | [Protein-arginine deiminase type-4 (EC 3.5.3.15) (Protein-arginine, deiminase type IV) (Peptidylarginine deiminase IV) (HL-60 PAD).]                                                                                                                       | Go Component not found |
| Q9UN75 | Protocadherin alpha 12 precursor (PCDH-alpha12).                                                                                                                                                                                                           | Go Component not found |
| Q9UNU6 | [Cytochrome P450 8B1 (EC 1.14.13.95) (CYPVIII B1) (7-alpha-, hydroxycholest-4-en-3-one 12-alpha-hydroxylase) (Sterol 12-alpha-, hydroxylase) (7-alpha-hydroxy-4-cholesten-3-one 12-alpha-hydroxylase).]                                                    | Go Component not found |
| Q9UP79 | [ADAMTS-8 precursor (EC 3.4.24.-) (A disintegrin and metalloproteinase, with thrombospondin motifs 8) (ADAM-TS 8) (ADAM-TS8) (METH-2) (METH-, 8).]                                                                                                         | Go Component not found |
| Q9UPG8 | Zinc finger protein PLAGL2 (Pleiomorphic adenoma-like protein 2).                                                                                                                                                                                          | Go Component not found |
| Q9Y236 | Oxidative stress induced growth inhibitor 2 (hT41).                                                                                                                                                                                                        | Go Component not found |

|        |                                                                                                                                                                                             |                        |
|--------|---------------------------------------------------------------------------------------------------------------------------------------------------------------------------------------------|------------------------|
| Q9Y281 | Cofilin-2 (Cofilin, muscle isoform).                                                                                                                                                        | Go Component not found |
| Q9Y2A7 | [Nck-associated protein 1 (NAP 1) (p125Nap1) (Membrane-associated, protein HEM-2).]                                                                                                         | Go Component not found |
| Q9Y388 | RNA-binding motif protein, X-linked 2.                                                                                                                                                      | Go Component not found |
| O00139 | Kinesin-like protein KIF2A (Kinesin-2) (HK2).                                                                                                                                               | Go Component not found |
| O00182 | Galectin-9 (HOM-HD-21) (Ecalectin).                                                                                                                                                         | Go Component not found |
| O00212 | [Rho-related GTP-binding protein RhoD precursor (Rho-related protein, HP1) (RhoHP1).]                                                                                                       | Go Component not found |
| O00408 | [cGMP-dependent 3',5'-cyclic phosphodiesterase (EC 3.1.4.17) (Cyclic, GMP-stimulated phosphodiesterase) (CGS-PDE) (cGSPDE).]                                                                | Go Component not found |
| O00459 | [Phosphatidylinositol 3-kinase regulatory subunit beta (PI3-kinase p85, subunit beta) (PtdIns-3-kinase p85-beta).]                                                                          | Go Component not found |
| O00515 | [Ladinin 1 (Lad-1) (120 kDa linear IgA bullous dermatosis antigen) (97, kDa linear IgA bullous dermatosis antigen) (Linear IgA disease antigen, homolog) (LadA).]                           | Go Component not found |
| O00744 | Protein Wnt-10b precursor (Wnt-12).                                                                                                                                                         | Go Component not found |
| O00755 | Protein Wnt-7a precursor.                                                                                                                                                                   | Go Component not found |
| O00767 | [Acyl-CoA desaturase (EC 1.14.19.1) (Stearoyl-CoA desaturase) (Fatty, acid desaturase) (Delta(9)-desaturase).]                                                                              | Go Component not found |
| O14531 | [Dihydropyrimidinase-related protein 4 (DRP-4) (Collapsin response, mediator protein 3) (CRMP-3) (UNC33-like phosphoprotein 4) (ULIP4, protein).]                                           | Go Component not found |
| O14578 | [Citron Rho-interacting kinase (EC 2.7.11.1) (CRIK) (Rho-interacting, serine/threonine-protein kinase 21).]                                                                                 | Go Component not found |
| O14598 | [Testis-specific basic protein Y 1 (Variably charged protein Y) (Basic, charge, Y-linked 1).]                                                                                               | Go Component not found |
| O14625 | [Small-inducible cytokine B11 precursor (CXCL11) (Interferon-inducible, T-cell alpha chemoattractant) (I-TAC) (Interferon-gamma-inducible, protein 9) (IP-9) (H174) (Beta-R1).]             | Go Component not found |
| O14647 | [Chromodomain-helicase-DNA-binding protein 2 (EC 3.6.1.-) (ATP-, dependent helicase CHD2) (CHD-2).]                                                                                         | Go Component not found |
| O14681 | Etoposide-induced protein 2.4 (p53-induced gene 8 protein).                                                                                                                                 | Go Component not found |
| O14732 | [Inositol monophosphatase 2 (EC 3.1.3.25) (IMPase 2) (IMP 2) (Inositol-, 1(or 4)-monophosphatase 2) (Myo-inositol monophosphatase A2).]                                                     | Go Component not found |
| O14793 | Growth/differentiation factor 8 precursor (GDF-8) (Myostatin).                                                                                                                              | Go Component not found |
| O14813 | [Paired mesoderm homeobox protein 2A (Paired-like homeobox 2A), (Aristaless homeobox protein homolog) (ARIX1 homeodomain protein).]                                                         | Go Component not found |
| O14829 | [Serine/threonine-protein phosphatase with EF-hands 1 (EC 3.1.3.16), (PPEF-1) (Protein phosphatase with EF calcium-binding domain) (PPEF), (Serine/threonine-protein phosphatase 7) (PP7).] | Go Component not found |
| O14862 | Interferon-inducible protein AIM2 (Absent in melanoma 2).                                                                                                                                   | Go Component not found |
| O14958 | Calsequestrin-2 precursor (Calsequestrin, cardiac muscle isoform).                                                                                                                          | Go Component not found |
| O14976 | Cyclin G-associated kinase (EC 2.7.11.1).                                                                                                                                                   | Go Component not found |
| O15016 | Tripartite motif-containing protein 66.                                                                                                                                                     | Go Component not found |
| O15105 | [Mothers against decapentaplegic homolog 7 (SMAD 7) (Mothers against, DPP homolog 7) (Smad7) (hSMAD7).]                                                                                     | Go Component not found |
| O15131 | Importin subunit alpha-6 (Karyopherin subunit alpha-5).                                                                                                                                     | Go Component not found |
| O15178 | Brachyury protein (T protein).                                                                                                                                                              | Go Component not found |
| O15197 | [Ephrin type-B receptor 6 precursor (Tyrosine-protein kinase-defective, receptor EPH-6) (HEP).]                                                                                             | Go Component not found |
| O15230 | Laminin subunit alpha-5 precursor.                                                                                                                                                          | Go Component not found |

|        |                                                                                                                                                                                                                                                                                                                                                                                                                                                                                           |                        |
|--------|-------------------------------------------------------------------------------------------------------------------------------------------------------------------------------------------------------------------------------------------------------------------------------------------------------------------------------------------------------------------------------------------------------------------------------------------------------------------------------------------|------------------------|
| O15264 | [Mitogen-activated protein kinase 13 (EC 2.7.11.24) (Stress-activated, protein kinase 4) (Mitogen-activated protein kinase p38 delta) (MAP, kinase p38 delta).]                                                                                                                                                                                                                                                                                                                           | Go Component not found |
| O15269 | [Serine palmitoyltransferase 1 (EC 2.3.1.50) (Long chain base, biosynthesis protein 1) (LCB 1) (Serine-palmitoyl-CoA transferase 1), (SPT 1) (SPT1).]                                                                                                                                                                                                                                                                                                                                     | Go Component not found |
| O15480 | Melanoma-associated antigen B3 (MAGE-B3 antigen).                                                                                                                                                                                                                                                                                                                                                                                                                                         | Go Component not found |
| O15519 | [CASP8 and FADD-like apoptosis regulator precursor (Cellular FLICE-like, inhibitory protein) (c-FLIP) (Caspase-eight-related protein) (Casper), (Caspase-like apoptosis regulatory protein) (CLARP) (MACH-related, inducer of toxicity) (MRIT) (Caspase homolog) (CASH) (Inhibitor of, FLICE) (I-FLICE) (FADD-like antiapoptotic molecule 1) (FLAME-1), (Usurpin) [Contains: CASP8 and FADD-like apoptosis regulator subunit, p43; CASP8 and FADD-like apoptosis regulator subunit p12].] | Go Component not found |
| O15534 | [Period circadian protein homolog 1 (Circadian clock protein PERIOD 1), (Circadian pacemaker protein Rigiui) (hPER1).]                                                                                                                                                                                                                                                                                                                                                                    | Go Component not found |
| O15544 | Protein GR6.                                                                                                                                                                                                                                                                                                                                                                                                                                                                              | Go Component not found |
| O43151 | Uncharacterized protein KIAA0401.                                                                                                                                                                                                                                                                                                                                                                                                                                                         | Go Component not found |
| O43236 | [Septin-4 (Peanut-like protein 2) (Brain protein H5) (Cell division, control-related protein 2) (hCDCREL-2) (Bradeion beta) (CE5B3 beta), (Cerebral protein 7).]                                                                                                                                                                                                                                                                                                                          | Go Component not found |
| O43301 | Heat shock 70 kDa protein 12A.                                                                                                                                                                                                                                                                                                                                                                                                                                                            | Go Component not found |
| O43309 | [Zinc finger and SCAN domain-containing protein 12 (Zinc finger protein, 96) (Zinc finger protein 305).]                                                                                                                                                                                                                                                                                                                                                                                  | Go Component not found |
| O43316 | Paired box protein Pax-4.                                                                                                                                                                                                                                                                                                                                                                                                                                                                 | Go Component not found |
| O43364 | Homeobox protein Hox-A2.                                                                                                                                                                                                                                                                                                                                                                                                                                                                  | Go Component not found |
| O43399 | Tumor protein D54 (hD54) (Tumor protein D52-like 2).                                                                                                                                                                                                                                                                                                                                                                                                                                      | Go Component not found |
| O43488 | [Aflatoxin B1 aldehyde reductase member 2 (EC 1.-.-.) (AFB1-AR 1), (Aldoketoreductase 7).]                                                                                                                                                                                                                                                                                                                                                                                                | Go Component not found |
| O43548 | [Protein-glutamine gamma-glutamyltransferase 5 (EC 2.3.2.13), (Transglutaminase-5) (TGase 5) (Transglutaminase X) (TGase X) (TGX), (TG(X)).]                                                                                                                                                                                                                                                                                                                                              | Go Component not found |
| O43566 | Regulator of G-protein signaling 14 (RGS14).                                                                                                                                                                                                                                                                                                                                                                                                                                              | Go Component not found |
| O43665 | Regulator of G-protein signaling 10 (RGS10).                                                                                                                                                                                                                                                                                                                                                                                                                                              | Go Component not found |
| O43900 | LIM domain only protein 6 (Triple LIM domain protein 6).                                                                                                                                                                                                                                                                                                                                                                                                                                  | Go Component not found |
| O60229 | [Kalirin (Huntingtin-associated protein-interacting protein) (Protein, Duo).]                                                                                                                                                                                                                                                                                                                                                                                                             | Go Component not found |
| O60285 | [NUAK family SNF1-like kinase 1 (EC 2.7.11.1) (AMPK-related protein, kinase 5).]                                                                                                                                                                                                                                                                                                                                                                                                          | Go Component not found |
| O60309 | Leucine-rich repeat-containing protein 37A.                                                                                                                                                                                                                                                                                                                                                                                                                                               | Go Component not found |
| O60481 | Zinc finger protein ZIC 3 (Zinc finger protein of the cerebellum 3).                                                                                                                                                                                                                                                                                                                                                                                                                      | Go Component not found |
| O60496 | Docking protein 2 (Downstream of tyrosine kinase 2) (p56(dok-2)).                                                                                                                                                                                                                                                                                                                                                                                                                         | Go Component not found |
| O60504 | [Vinexin (Sorbin and SH3 domain-containing protein 3) (SH3-containing, adapter molecule 1) (SCAM-1).]                                                                                                                                                                                                                                                                                                                                                                                     | Go Component not found |
| O60551 | [Glycylpeptide N-tetradecanoyltransferase 2 (EC 2.3.1.97) (Peptide N-, myristoyltransferase 2) (Myristoyl-CoA:protein N-myristoyltransferase, 2) (NMT 2) (Type II N-myristoyltransferase).]                                                                                                                                                                                                                                                                                               | Go Component not found |
| O60662 | [Kelch repeat and BTB domain-containing protein 10 (Kelch-related, protein 1) (Kel-like protein 23) (Sarcosin).]                                                                                                                                                                                                                                                                                                                                                                          | Go Component not found |
| O60673 | DNA polymerase zeta catalytic subunit (EC 2.7.7.7) (hREV3).                                                                                                                                                                                                                                                                                                                                                                                                                               | Go Component not found |
| O60711 | Leupaxin.                                                                                                                                                                                                                                                                                                                                                                                                                                                                                 | Go Component not found |
| O60806 | [T-box transcription factor TBX19 (T-box protein 19) (T-box factor,, pituitary).]                                                                                                                                                                                                                                                                                                                                                                                                         | Go Component not found |
| O60861 | Growth arrest-specific protein 7 (GAS-7).                                                                                                                                                                                                                                                                                                                                                                                                                                                 | Go Component not found |
| O60885 | Bromodomain-containing protein 4 (HUNK1 protein).                                                                                                                                                                                                                                                                                                                                                                                                                                         | Go Component not found |

|        |                                                                                                                                                                                                                                           |                        |
|--------|-------------------------------------------------------------------------------------------------------------------------------------------------------------------------------------------------------------------------------------------|------------------------|
| O75038 | [1-phosphatidylinositol-4,5-bisphosphate phosphodiesterase eta-2, (EC 3.1.4.11) (Phosphoinositide phospholipase C) (Phospholipase C-eta-, 2) (PLC-eta-2) (Phosphoinositide phospholipase C-like 4), (Phospholipase C-like 4) (Fragment).] | Go Component not found |
| O75340 | [Programmed cell death protein 6 (Apoptosis-linked gene 2 protein), (Probable calcium-binding protein ALG-2).]                                                                                                                            | Go Component not found |
| O75364 | Pituitary homeobox 3 (Homeobox protein PITX3).                                                                                                                                                                                            | Go Component not found |
| O75410 | [Transforming acidic coiled-coil-containing protein 1 (Taxin 1), (Gastric cancer antigen Ga55).]                                                                                                                                          | Go Component not found |
| O75439 | [Mitochondrial-processing peptidase subunit beta, mitochondrial, precursor (EC 3.4.24.64) (Beta-MPP) (P-52).]                                                                                                                             | Go Component not found |
| O75562 | Protein HFSE-1.                                                                                                                                                                                                                           | Go Component not found |
| O75604 | [Ubiquitin carboxyl-terminal hydrolase 2 (EC 3.1.2.15) (Ubiquitin, thioesterase 2) (Ubiquitin-specific-processing protease 2), (Deubiquitinating enzyme 2) (41 kDa ubiquitin-specific protease).]                                         | Go Component not found |
| O75631 | Uroplakin-3A precursor (Uroplakin III) (UPIII).                                                                                                                                                                                           | Go Component not found |
| O75688 | [Protein phosphatase 1B (EC 3.1.3.16) (Protein phosphatase 2C isoform, beta) (PP2C-beta).]                                                                                                                                                | Go Component not found |
| O75715 | [Epididymal secretory glutathione peroxidase precursor (EC 1.11.1.9), (Epididymis-specific glutathione peroxidase-like protein) (EGLP).]                                                                                                  | Go Component not found |
| O75820 | Zinc finger protein 189.                                                                                                                                                                                                                  | Go Component not found |
| O75881 | [Cytochrome P450 7B1 (EC 1.14.13.100) (25-hydroxycholesterol 7-alpha-, hydroxylase) (Oxysterol 7-alpha-hydroxylase).]                                                                                                                     | Go Component not found |
| O75897 | [Sulfotransferase 1C4 (EC 2.8.2.-) (SULT1C) (Sulfotransferase 1C2), (SULT1C#2).]                                                                                                                                                          | Go Component not found |
| P07864 | [L-lactate dehydrogenase C chain (EC 1.1.1.27) (LDH-C) (LDH testis, subunit) (LDH-X) (Cancer/testis antigen 32) (CT32).]                                                                                                                  | Go Component not found |
| P08236 | Beta-glucuronidase precursor (EC 3.2.1.31) (Beta-G1).                                                                                                                                                                                     | Go Component not found |
| P09067 | Homeobox protein Hox-B5 (Hox-2A) (HHO.C10) (HU-1).                                                                                                                                                                                        | Go Component not found |
| P09668 | [Cathepsin H precursor (EC 3.4.22.16) [Contains: Cathepsin H mini, chain; Cathepsin H heavy chain; Cathepsin H light chain].]                                                                                                             | Go Component not found |
| P09769 | [Proto-oncogene tyrosine-protein kinase FGR (EC 2.7.10.2) (P55-FGR) (C-, FGR).]                                                                                                                                                           | Go Component not found |
| P09917 | Arachidonate 5-lipoxygenase (EC 1.13.11.34) (5-lipoxygenase) (5-LO).                                                                                                                                                                      | Go Component not found |
| P09972 | Fructose-bisphosphate aldolase C (EC 4.1.2.13) (Brain-type aldolase).                                                                                                                                                                     | Go Component not found |
| P10070 | Zinc finger protein GLI2 (Tax helper protein).                                                                                                                                                                                            | Go Component not found |
| P10074 | [Zinc finger and BTB domain-containing protein 48 (Krueppel-related, zinc finger protein 3) (Protein HKR3).]                                                                                                                              | Go Component not found |
| P10267 | [HERV-K_5q33.3 provirus ancestral Env polyprotein (Envelope, polyprotein) (HERV-K10 envelope protein) (HERV-K107 envelope protein), [Contains: Surface protein (SU); Transmembrane protein (TM)].]                                        | Go Component not found |
| P10398 | [A-Raf proto-oncogene serine/threonine-protein kinase (EC 2.7.11.1) (A-, raf-1) (Proto-oncogene Pks).]                                                                                                                                    | Go Component not found |
| P10645 | [Chromogranin-A precursor (CgA) (Pituitary secretory protein I) (SP-I), [Contains: Vasostatin-1 (Vasostatin I); Vasostatin-2 (Vasostatin II);, EA-92; ES-43; Pancreastatin; SS-18; WA-8; WE-14; LF-19; AL-11; GV-19; GR-44; ER-37].]      | Go Component not found |
| P10745 | [Interphotoreceptor retinoid-binding protein precursor (IRBP), (Interstitial retinol-binding protein).]                                                                                                                                   | Go Component not found |
| P10827 | [Thyroid hormone receptor alpha (C-erbA-alpha) (c-erbA-1) (EAR-7), (EAR7).]                                                                                                                                                               | Go Component not found |
| P11086 | [Phenylethanolamine N-methyltransferase (EC 2.1.1.28) (PNMTase), (Noradrenaline N-methyltransferase).]                                                                                                                                    | Go Component not found |
| P11161 | Early growth response protein 2 (EGR-2) (Protein Krox-20) (AT591).                                                                                                                                                                        | Go Component not found |
| P11245 | [Arylamine N-acetyltransferase 2 (EC 2.3.1.5) (Arylamide acetylase 2), (Polymorphic arylamine N-acetyltransferase) (PNAT) (N-, acetyltransferase type 2) (NAT-2).]                                                                        | Go Component not found |
| P11441 | Ubiquitin-like protein 4A (Ubiquitin-like protein GDX).                                                                                                                                                                                   | Go Component not found |
| P11597 | [Cholesteryl ester transfer protein precursor (Lipid transfer protein, I).]                                                                                                                                                               | Go Component not found |

|        |                                                                                                                                                                                                                                                                                                              |                        |
|--------|--------------------------------------------------------------------------------------------------------------------------------------------------------------------------------------------------------------------------------------------------------------------------------------------------------------|------------------------|
| P11801 | Serine/threonine-protein kinase H1 (EC 2.7.11.1) (PSK-H1).                                                                                                                                                                                                                                                   | Go Component not found |
| P12525 | L-myc-2 protein.                                                                                                                                                                                                                                                                                             | Go Component not found |
| P12644 | Bone morphogenetic protein 4 precursor (BMP-4) (BMP-2B).                                                                                                                                                                                                                                                     | Go Component not found |
| P13073 | [Cytochrome c oxidase subunit 4 isoform 1, mitochondrial precursor, (EC 1.9.3.1) (Cytochrome c oxidase subunit IV isoform 1) (COX IV-1), (Cytochrome c oxidase polypeptide IV).]                                                                                                                             | Go Component not found |
| P13498 | [Cytochrome b-245 light chain (p22 phagocyte B-cytochrome) (Neutrophil, cytochrome b 22 kDa polypeptide) (p22-phox) (p22phox) (Cytochrome, b(558) alpha chain) (Cytochrome b558 subunit alpha) (Superoxide-, generating NADPH oxidase light chain subunit).]                                                 | Go Component not found |
| P13646 | [Keratin, type I cytoskeletal 13 (Cytokeratin-13) (CK-13) (Keratin-13), (K13).]                                                                                                                                                                                                                              | Go Component not found |
| P13671 | Complement component C6 precursor.                                                                                                                                                                                                                                                                           | Go Component not found |
| P13716 | [Delta-aminolevulinic acid dehydratase (EC 4.2.1.24) (Porphobilinogen, synthase) (ALADH).]                                                                                                                                                                                                                   | Go Component not found |
| P14222 | [Perforin-1 precursor (P1) (Lymphocyte pore-forming protein) (PFP), (Cytolysin).]                                                                                                                                                                                                                            | Go Component not found |
| P14550 | [Alcohol dehydrogenase [NADP+] (EC 1.1.1.2) (Aldehyde reductase) (Aldo-, keto reductase family 1 member A1).]                                                                                                                                                                                                | Go Component not found |
| P15086 | [Carboxypeptidase B precursor (EC 3.4.17.2) (Pancreas-specific protein), (PASP).]                                                                                                                                                                                                                            | Go Component not found |
| P15622 | Zinc finger protein 250 (Zinc finger protein 647).                                                                                                                                                                                                                                                           | Go Component not found |
| P15918 | [V(D)J recombination-activating protein 1 (RAG-1) (RING finger protein, 74).]                                                                                                                                                                                                                                | Go Component not found |
| P16278 | [Beta-galactosidase precursor (EC 3.2.1.23) (Lactase) (Acid beta-, galactosidase) (Elastin receptor 1).]                                                                                                                                                                                                     | Go Component not found |
| P16383 | [GC-rich sequence DNA-binding factor (GCF) (Transcription factor 9), (TCF-9).]                                                                                                                                                                                                                               | Go Component not found |
| P16415 | Zinc finger protein ZFP-36.                                                                                                                                                                                                                                                                                  | Go Component not found |
| P16444 | [Dipeptidase 1 precursor (EC 3.4.13.19) (Microsomal dipeptidase) (Renal, dipeptidase) (hRDP) (Dehydropeptidase-I).]                                                                                                                                                                                          | Go Component not found |
| P16499 | [Rod cGMP-specific 3',5'-cyclic phosphodiesterase subunit alpha, (EC 3.1.4.35) (GMP-PDE alpha) (PDE V-B1).]                                                                                                                                                                                                  | Go Component not found |
| P16930 | [Fumarylacetoacetase (EC 3.7.1.2) (Fumarylacetoacetate hydrolase), (Beta-diketonase) (FAA).]                                                                                                                                                                                                                 | Go Component not found |
| P17021 | Zinc finger protein 17 (Zinc finger protein KOX10) (HPF3).                                                                                                                                                                                                                                                   | Go Component not found |
| P17050 | [Alpha-N-acetylgalactosaminidase precursor (EC 3.2.1.49) (Alpha-, galactosidase B).]                                                                                                                                                                                                                         | Go Component not found |
| P17097 | [Zinc finger protein 7 (Zinc finger protein KOX4) (Zinc finger protein, HF.16).]                                                                                                                                                                                                                             | Go Component not found |
| P17600 | Synapsin-1 (Synapsin I) (Brain protein 4.1).                                                                                                                                                                                                                                                                 | Go Component not found |
| P17707 | [S-adenosylmethionine decarboxylase proenzyme (EC 4.1.1.50) (AdoMetDC), (SamDC) [Contains: S-adenosylmethionine decarboxylase alpha chain; S-, adenosylmethionine decarboxylase beta chain].]                                                                                                                | Go Component not found |
| P17947 | Transcription factor PU.1 (31 kDa-transforming protein).                                                                                                                                                                                                                                                     | Go Component not found |
| P18031 | [Tyrosine-protein phosphatase non-receptor type 1 (EC 3.1.3.48), (Protein-tyrosine phosphatase 1B) (PTP-1B).]                                                                                                                                                                                                | Go Component not found |
| P18583 | [SON protein (SON3) (Negative regulatory element-binding protein) (NRE-, binding protein) (DBP-5) (Bax antagonist selected in saccharomyces 1), (BASS1).]                                                                                                                                                    | Go Component not found |
| P18847 | [Cyclic AMP-dependent transcription factor ATF-3 (Activating, transcription factor 3).]                                                                                                                                                                                                                      | Go Component not found |
| P18887 | DNA-repair protein XRCC1 (X-ray repair cross-complementing protein 1).                                                                                                                                                                                                                                       | Go Component not found |
| P19525 | [Interferon-induced, double-stranded RNA-activated protein kinase, (EC 2.7.11.1) (Interferon-inducible RNA-dependent protein kinase), (Eukaryotic translation initiation factor 2-alpha kinase 2) (eIF-2A, protein kinase 2) (Protein kinase RNA-activated) (PKR) (p68 kinase), (P1/eIF-2A protein kinase).] | Go Component not found |
| P19878 | [Neutrophil cytosol factor 2 (NCF-2) (Neutrophil NADPH oxidase factor, 2) (67 kDa neutrophil oxidase factor) (p67-phox) (NOXA2).]                                                                                                                                                                            | Go Component not found |

|        |                                                                                                                                                                                                   |                        |
|--------|---------------------------------------------------------------------------------------------------------------------------------------------------------------------------------------------------|------------------------|
| P20132 | L-serine dehydratase (EC 4.3.1.17) (L-serine deaminase).                                                                                                                                          | Go Component not found |
| P20273 | [B-cell receptor CD22 precursor (Sialic acid-binding Ig-like lectin 2), (Siglec-2) (Leu-14) (B-lymphocyte cell adhesion molecule) (BL-CAM).]                                                      | Go Component not found |
| P20848 | Alpha-1-antitrypsin-related protein precursor.                                                                                                                                                    | Go Component not found |
| P42331 | Rho GTPase-activating protein 25.                                                                                                                                                                 | Go Component not found |
| P42658 | [Dipeptidyl aminopeptidase-like protein 6 (Dipeptidylpeptidase VI), (Dipeptidylpeptidase 6) (Dipeptidyl peptidase IV-like protein), (Dipeptidyl aminopeptidase-related protein) (DPPX).]          | Go Component not found |
| P42680 | Tyrosine-protein kinase Tec (EC 2.7.10.2).                                                                                                                                                        | Go Component not found |
| P42694 | Probable helicase with zinc finger domain (EC 3.6.1.-).                                                                                                                                           | Go Component not found |
| P43026 | [Growth/differentiation factor 5 precursor (GDF-5) (Cartilage-derived, morphogenetic protein 1) (CDMP-1) (Radoterin).]                                                                            | Go Component not found |
| P43235 | [Cathepsin K precursor (EC 3.4.22.38) (Cathepsin O) (Cathepsin X), (Cathepsin O2).]                                                                                                               | Go Component not found |
| P43251 | Biotinidase precursor (EC 3.5.1.12).                                                                                                                                                              | Go Component not found |
| P43357 | [Melanoma-associated antigen 3 (MAGE-3 antigen) (Antigen MZ2-D), (Cancer/testis antigen 1.3) (CT1.3).]                                                                                            | Go Component not found |
| P43362 | [Melanoma-associated antigen 9 (MAGE-9 antigen) (Cancer/testis antigen, 1.9) (CT1.9).]                                                                                                            | Go Component not found |
| P46013 | Antigen KI-67.                                                                                                                                                                                    | Go Component not found |
| P46109 | Crk-like protein.                                                                                                                                                                                 | Go Component not found |
| P46459 | [Vesicle-fusing ATPase (EC 3.6.4.6) (Vesicular-fusion protein NSF) (N-, ethylmaleimide sensitive fusion protein) (NEM-sensitive fusion, protein).]                                                | Go Component not found |
| P47895 | [Aldehyde dehydrogenase 1A3 (EC 1.2.1.5) (Aldehyde dehydrogenase 6), (Retinaldehyde dehydrogenase 3) (RALDH-3).]                                                                                  | Go Component not found |
| P47974 | [Butyrate response factor 2 (Protein TIS11D) (EGF-response factor 2), (ERF-2).]                                                                                                                   | Go Component not found |
| P47992 | [Lymphotoxin precursor (XCL1) (Cytokine SCM-1) (ATAC) (Lymphotoxin), (SCM-1-alpha) (Small-inducible cytokine C1) (XC chemokine ligand 1).]                                                        | Go Component not found |
| P48378 | DNA-binding protein RFX2.                                                                                                                                                                         | Go Component not found |
| P48637 | [Glutathione synthetase (EC 6.3.2.3) (Glutathione synthase) (GSH, synthetase) (GSH-S).]                                                                                                           | Go Component not found |
| P48736 | [Phosphatidylinositol-4,5-bisphosphate 3-kinase catalytic subunit gamma, isoform (EC 2.7.1.153) (PI3-kinase p110 subunit gamma) (PtdIns-3-, kinase subunit p110) (PI3K) (PI3Kgamma) (p120-PI3K).] | Go Component not found |
| P49116 | Orphan nuclear receptor TR4 (Orphan nuclear receptor TAK1).                                                                                                                                       | Go Component not found |
| P49221 | [Protein-glutamine gamma-glutamyltransferase 4 (EC 2.3.2.13), (Transglutaminase-4) (TGase-4) (Prostate transglutaminase) (TGP), (TG(P)) (Prostate-specific transglutaminase) (Fibrinolygase).]    | Go Component not found |
| P49459 | [Ubiquitin-conjugating enzyme E2 A (EC 6.3.2.19) (Ubiquitin-protein, ligase A) (Ubiquitin carrier protein A) (HR6A) (hHR6A).]                                                                     | Go Component not found |
| P49593 | [Protein phosphatase 1F (EC 3.1.3.16) (Ca(2+)/calmodulin-dependent, protein kinase phosphatase) (CaM-kinase phosphatase) (CaMKPase), (Partner of PIX 2) (hFEM-2).]                                | Go Component not found |
| P49675 | [Steroidogenic acute regulatory protein, mitochondrial precursor (StAR), (StARD1).]                                                                                                               | Go Component not found |
| P49750 | YLP motif-containing protein 1 (Nuclear protein ZAP3) (ZAP113).                                                                                                                                   | Go Component not found |
| P49758 | Regulator of G-protein signaling 6 (RGS6) (S914).                                                                                                                                                 | Go Component not found |
| P49761 | [Dual specificity protein kinase CLK3 (EC 2.7.12.1) (CDC-like kinase, 3).]                                                                                                                        | Go Component not found |
| P49798 | Regulator of G-protein signaling 4 (RGS4) (RGP4).                                                                                                                                                 | Go Component not found |
| P49862 | [Kallikrein-7 precursor (EC 3.4.21.117) (hK7) (Stratum corneum, chymotryptic enzyme) (hSCCE) (Serine protease 6).]                                                                                | Go Component not found |
| P49902 | [Cytosolic purine 5'-nucleotidase (EC 3.1.3.5) (5'-nucleotidase, cytosolic II).]                                                                                                                  | Go Component not found |

|        |                                                                                                                                                                                                                                                                                                                                                                               |                        |
|--------|-------------------------------------------------------------------------------------------------------------------------------------------------------------------------------------------------------------------------------------------------------------------------------------------------------------------------------------------------------------------------------|------------------------|
| P49917 | [DNA ligase 4 (EC 6.5.1.1) (DNA ligase IV) (Polydeoxyribonucleotide, synthase [ATP] 4).]                                                                                                                                                                                                                                                                                      | Go Component not found |
| P50120 | Retinol-binding protein II, cellular (CRBP-II).                                                                                                                                                                                                                                                                                                                               | Go Component not found |
| P50213 | [Isocitrate dehydrogenase [NAD] subunit alpha, mitochondrial precursor, (EC 1.1.1.41) (Isocitric dehydrogenase) (NAD(+)-specific ICDH).]                                                                                                                                                                                                                                      | Go Component not found |
| P50851 | [Lipopolysaccharide-responsive and beige-like anchor protein (CDC4-like, protein) (Beige-like protein).]                                                                                                                                                                                                                                                                      | Go Component not found |
| P51157 | Ras-related protein Rab-28 (Rab-26).                                                                                                                                                                                                                                                                                                                                          | Go Component not found |
| P51449 | [Nuclear receptor ROR-gamma (Retinoid-related orphan receptor-gamma), (Nuclear receptor RZR-gamma).]                                                                                                                                                                                                                                                                          | Go Component not found |
| P51530 | [DNA2-like helicase (EC 3.6.1.-) (DNA replication ATP-dependent, helicase-like homolog).]                                                                                                                                                                                                                                                                                     | Go Component not found |
| P51648 | [Fatty aldehyde dehydrogenase (EC 1.2.1.3) (Aldehyde dehydrogenase,, microsomal) (Aldehyde dehydrogenase family 3 member A2) (Aldehyde, dehydrogenase 10).]                                                                                                                                                                                                                   | Go Component not found |
| P51817 | [Serine/threonine-protein kinase PRKX (EC 2.7.11.1) (Protein kinase, PKX1).]                                                                                                                                                                                                                                                                                                  | Go Component not found |
| P51878 | [Caspase-5 precursor (EC 3.4.22.58) (CASP-5) (ICH-3 protease) (TY, protease) (ICE(rel)-III) [Contains: Caspase-5 subunit p20; Caspase-5, subunit p10].]                                                                                                                                                                                                                       | Go Component not found |
| P51948 | [CDK-activating kinase assembly factor MAT1 (RING finger protein MAT1), (Menage a trois) (CDK7/cyclin H assembly factor) (p36) (p35) (Cyclin, G1-interacting protein) (RING finger protein 66).]                                                                                                                                                                              | Go Component not found |
| P52306 | [Rap1 GTPase-GDP dissociation stimulator 1 (SMG P21 stimulatory GDP/GTP, exchange protein) (SMG GDS protein) (Exchange factor smgGDS).]                                                                                                                                                                                                                                       | Go Component not found |
| P52564 | [Dual specificity mitogen-activated protein kinase kinase 6, (EC 2.7.12.2) (MAP kinase kinase 6) (MAPKK 6) (MAPK/ERK kinase 6), (SAPKK3).]                                                                                                                                                                                                                                    | Go Component not found |
| P52737 | Zinc finger protein 136.                                                                                                                                                                                                                                                                                                                                                      | Go Component not found |
| P52743 | Zinc finger protein 137.                                                                                                                                                                                                                                                                                                                                                      | Go Component not found |
| P52848 | [Bifunctional heparan sulfate N-deacetylase/N-sulfotransferase 1, (EC 2.8.2.8) (Glucosaminyl N-deacetylase/N-sulfotransferase 1) (NDST-, 1) ([Heparan sulfate]-glucosamine N-sulfotransferase 1) (HSNST 1) (N-, heparan sulfate sulfotransferase 1) (N-HSST 1) [Includes: Heparan, sulfate N-deacetylase 1 (EC 3.-.-.); Heparan sulfate N-, sulfotransferase 1 (EC 2.8.2.-).] | Go Component not found |
| P53611 | [Geranylgeranyl transferase type-2 subunit beta (EC 2.5.1.60), (Geranylgeranyl transferase type II subunit beta) (Rab, geranylgeranyltransferase subunit beta) (Rab geranyl-, geranyltransferase subunit beta) (Rab GG transferase beta) (Rab GGTase, beta).]                                                                                                                 | Go Component not found |
| P54296 | [Myomesin-2 (M-protein) (165 kDa titin-associated protein) (165 kDa, connectin-associated protein).]                                                                                                                                                                                                                                                                          | Go Component not found |
| P54619 | [5'-AMP-activated protein kinase subunit gamma-1 (AMPK gamma-1 chain), (AMPKg).]                                                                                                                                                                                                                                                                                              | Go Component not found |
| P54687 | [Branched-chain-amino-acid aminotransferase, cytosolic (EC 2.6.1.42), (BCAT(c)) (Protein ECA39).]                                                                                                                                                                                                                                                                             | Go Component not found |
| P54922 | [Protein ADP-ribosylarginine] hydrolase (EC 3.2.2.19) (ADP-, ribosylarginine hydrolase) (ADP-ribose-L-arginine cleaving enzyme).]                                                                                                                                                                                                                                             | Go Component not found |
| P55040 | [GTP-binding protein GEM (GTP-binding mitogen-induced T-cell protein), (RAS-like protein KIR).]                                                                                                                                                                                                                                                                               | Go Component not found |
| P55212 | [Caspase-6 precursor (EC 3.4.22.59) (CASP-6) (Apoptotic protease Mch-2), [Contains: Caspase-6 subunit p18; Caspase-6 subunit p11].]                                                                                                                                                                                                                                           | Go Component not found |
| P55283 | Cadherin-4 precursor (Retinal cadherin) (R-cadherin) (R-CAD).                                                                                                                                                                                                                                                                                                                 | Go Component not found |
| P55774 | [Small-inducible cytokine A18 precursor (CCL18) (Macrophage, inflammatory protein 4) (MIP-4) (Pulmonary and activation-regulated, chemokine) (CC chemokine PARC) (Alternative macrophage activation-, associated CC chemokine 1) (AMAC-1) (Dendritic cell chemokine 1) (DC-, CK1) [Contains: CCL18(1-68); CCL18(3-69); CCL18(4-69)].]                                         | Go Component not found |
| P55899 | [IgG receptor FcRn large subunit p51 precursor (FcRn) (Neonatal Fc, receptor) (IgG Fc fragment receptor transporter alpha chain).]                                                                                                                                                                                                                                            | Go Component not found |



|        |                                                                                                                                                                                                                                                                                                 |                        |
|--------|-------------------------------------------------------------------------------------------------------------------------------------------------------------------------------------------------------------------------------------------------------------------------------------------------|------------------------|
| P56202 | Cathepsin W precursor (EC 3.4.22.-) (Lymphopain).                                                                                                                                                                                                                                               | Go Component not found |
| P56282 | [DNA polymerase epsilon subunit 2 (EC 2.7.7.7) (DNA polymerase II, subunit 2) (DNA polymerase epsilon subunit B).]                                                                                                                                                                              | Go Component not found |
| P56545 | C-terminal-binding protein 2 (CtBP2).                                                                                                                                                                                                                                                           | Go Component not found |
| P56597 | [Nucleoside diphosphate kinase homolog 5 (NDK-H 5) (NDP kinase homolog, 5) (nm23-H5) (Testis-specific nm23 homolog) (Inhibitor of p53-induced, apoptosis-beta) (IPIA-beta).]                                                                                                                    | Go Component not found |
| P56696 | [Potassium voltage-gated channel subfamily KQT member 4 (Voltage-gated, potassium channel subunit Kv7.4) (Potassium channel subunit alpha, KvLQT4) (KQT-like 4).]                                                                                                                               | Go Component not found |
| P56715 | [Oxygen-regulated protein 1 (Retinitis pigmentosa RP1 protein), (Retinitis pigmentosa 1 protein).]                                                                                                                                                                                              | Go Component not found |
| P57052 | Putative RNA-binding protein 11 (RNA-binding motif protein 11).                                                                                                                                                                                                                                 | Go Component not found |
| P57058 | [Hormonally up-regulated neu tumor-associated kinase (EC 2.7.11.1), (Serine/threonine-protein kinase MAK-V) (B19).]                                                                                                                                                                             | Go Component not found |
| P57103 | [Sodium/calcium exchanger 3 precursor (Na(+)/Ca(2+)-exchange protein, 3).]                                                                                                                                                                                                                      | Go Component not found |
| P57723 | Poly(rC)-binding protein 4 (Alpha-CP4).                                                                                                                                                                                                                                                         | Go Component not found |
| P57738 | [T-cell leukemia translocation-altered gene protein (T-cell leukemia, translocation-associated gene protein).]                                                                                                                                                                                  | Go Component not found |
| P57789 | [Potassium channel subfamily K member 10 (Outward rectifying potassium, channel protein TREK-2) (TREK-2 K(+) channel subunit).]                                                                                                                                                                 | Go Component not found |
| Q13405 | [Mitochondrial 39S ribosomal protein L49 (L49mt) (MRP-L49) (Protein, NOF1) (Neighbor of FAU) (NOF).]                                                                                                                                                                                            | Go Component not found |
| Q13434 | [Makorin-4 (Zinc finger protein 127-Xp) (ZNF127-Xp) (RING finger, protein 64).]                                                                                                                                                                                                                 | Go Component not found |
| Q13451 | [FK506-binding protein 5 (EC 5.2.1.8) (Peptidyl-prolyl cis-trans, isomerase) (PPIase) (Rotamase) (51 kDa FK506-binding protein) (FKBP-, 51) (54 kDa progesterone receptor-associated immunophilin) (FKBP54), (P54) (FF1 antigen) (HSP90-binding immunophilin) (Androgen-regulated, protein 6).] | Go Component not found |
| Q13474 | Dystrophin-related protein 2.                                                                                                                                                                                                                                                                   | Go Component not found |
| Q13490 | [Baculoviral IAP repeat-containing protein 2 (Inhibitor of apoptosis, protein 2) (HIAP2) (HIAP-2) (C-IAP1) (TNFR2-TRAF-signaling complex, protein 2) (IAP homolog B) (RING finger protein 48).]                                                                                                 | Go Component not found |
| Q13516 | [Oligodendrocyte transcription factor 2 (Oligo2) (Class B basic helix-, loop-helix protein 1) (bHLHB1) (Protein kinase C-binding protein, RACK17) (Protein kinase C-binding protein 2).]                                                                                                        | Go Component not found |
| Q13618 | Cullin-3 (CUL-3).                                                                                                                                                                                                                                                                               | Go Component not found |
| Q13634 | Cadherin-18 precursor (Cadherin-14).                                                                                                                                                                                                                                                            | Go Component not found |
| Q13753 | [Laminin subunit gamma-2 precursor (Laminin 5 gamma 2 subunit), (Kalinin/nicein/epiligrin 100 kDa subunit) (Laminin B2t chain) (Cell-, scattering factor 140 kDa subunit) (CSF 140 kDa subunit) (Large, adhesive scatter factor 140 kDa subunit) (Ladsin 140 kDa subunit).]                     | Go Component not found |
| Q13886 | [Krueppel-like factor 9 (Transcription factor BTEB1) (Basic, transcription element-binding protein 1) (BTE-binding protein 1) (GC-, box-binding protein 1).]                                                                                                                                    | Go Component not found |
| Q14004 | [Cell division cycle 2-like protein kinase 5 (EC 2.7.11.22) (CDC2-, related protein kinase 5) (Cholinesterase-related cell division, controller).]                                                                                                                                              | Go Component not found |
| Q14012 | [Calcium/calmodulin-dependent protein kinase type 1 (EC 2.7.11.17) (CaM, kinase I) (CaM-KI) (CaM kinase I alpha) (CaMKI-alpha).]                                                                                                                                                                | Go Component not found |
| Q14088 | Ras-related protein Rab-33A (Small GTP-binding protein S10).                                                                                                                                                                                                                                    | Go Component not found |
| Q14149 | [MORC family CW-type zinc finger protein 3 (Zinc finger CW-type coiled-, coil domain protein 3).]                                                                                                                                                                                               | Go Component not found |
| Q14157 | Ubiquitin-associated protein 2-like (Protein NICE-4).                                                                                                                                                                                                                                           | Go Component not found |
| Q14165 | Uncharacterized protein KIAA0152 precursor.                                                                                                                                                                                                                                                     | Go Component not found |

|        |                                                                                                                                                                                                                                   |                        |
|--------|-----------------------------------------------------------------------------------------------------------------------------------------------------------------------------------------------------------------------------------|------------------------|
| Q14188 | Transcription factor Dp-2 (E2F dimerization partner 2).                                                                                                                                                                           | Go Component not found |
| Q14195 | [Dihydropyrimidinase-related protein 3 (DRP-3) (Unc-33-like, phosphoprotein) (ULIP protein) (Collapsin response mediator protein 4), (CRMP-4).]                                                                                   | Go Component not found |
| Q14206 | [Calcipressin-2 (Regulator of calcineurin 2) (Down syndrome candidate, region 1-like 1) (Thyroid hormone-responsive protein ZAKI-4) (Myocyte-, enriched calcineurin-interacting protein 2) (MCIP2).]                              | Go Component not found |
| Q14249 | Endonuclease G, mitochondrial precursor (EC 3.1.30.-) (Endo G).                                                                                                                                                                   | Go Component not found |
| Q14353 | Guanidinoacetate N-methyltransferase (EC 2.1.1.2).                                                                                                                                                                                | Go Component not found |
| Q14449 | Growth factor receptor-bound protein 14 (GRB14 adapter protein).                                                                                                                                                                  | Go Component not found |
| Q14584 | Zinc finger protein 266 (Zinc finger protein 1) (HZF1).                                                                                                                                                                           | Go Component not found |
| Q14588 | Zinc finger protein 234 (Zinc finger protein 4) (HZF4).                                                                                                                                                                           | Go Component not found |
| Q14651 | Plastin-1 (I-plastin) (Intestine-specific plastin).                                                                                                                                                                               | Go Component not found |
| Q14681 | BTB/POZ domain-containing protein KCTD2.                                                                                                                                                                                          | Go Component not found |
| Q14694 | [Ubiquitin carboxyl-terminal hydrolase 10 (EC 3.1.2.15) (Ubiquitin, thioesterase 10) (Ubiquitin-specific-processing protease 10), (Deubiquitinating enzyme 10).]                                                                  | Go Component not found |
| Q14765 | Signal transducer and activator of transcription 4.                                                                                                                                                                               | Go Component not found |
| Q14814 | Myocyte-specific enhancer factor 2D.                                                                                                                                                                                              | Go Component not found |
| Q14839 | [Chromodomain-helicase-DNA-binding protein 4 (EC 3.6.1.-) (ATP-, dependent helicase CHD4) (CHD-4) (Mi-2 autoantigen 218 kDa protein), (Mi2 beta).]                                                                                | Go Component not found |
| Q14938 | [Nuclear factor 1 X-type (Nuclear factor 1/X) (NF1-X) (NFI-X) (NF-I/X), (CCAAT-box-binding transcription factor) (CTF) (TGGCA-binding, protein).]                                                                                 | Go Component not found |
| Q15032 | R3H domain-containing protein 1.                                                                                                                                                                                                  | Go Component not found |
| Q15051 | IQ calmodulin-binding motif-containing protein 1 (Nephrocystin-5).                                                                                                                                                                | Go Component not found |
| Q15124 | [Phosphoglucomutase-like protein 5 (Phosphoglucomutase-related protein), (PGM-RP) (Aciculin).]                                                                                                                                    | Go Component not found |
| Q15165 | [Serum paraoxonase/arylesterase 2 (EC 3.1.1.2) (EC 3.1.8.1) (PON 2), (Serum aryldialkylphosphatase 2) (A-esterase 2) (Aromatic esterase 2).]                                                                                      | Go Component not found |
| Q15283 | Ras GTPase-activating protein 2 (GAP1m).                                                                                                                                                                                          | Go Component not found |
| Q15418 | [Ribosomal protein S6 kinase alpha-1 (EC 2.7.11.1) (S6K-alpha 1) (90, kDa ribosomal protein S6 kinase 1) (p90-RSK 1) (Ribosomal S6 kinase 1), (RSK-1) (pp90RSK1) (p90S6K) (MAP kinase-activated protein kinase 1a), (MAPKAPK1A).] | Go Component not found |
| Q15477 | Helicase SKI2W (EC 3.6.1.-) (Helicase-like protein) (HLP).                                                                                                                                                                        | Go Component not found |
| Q15506 | [Sperm surface protein Sp17 (Sperm autoantigenic protein 17) (Sperm, protein 17) (Sp17-1) (Cancer/testis antigen 22) (CT22).]                                                                                                     | Go Component not found |
| Q15643 | [Thyroid receptor-interacting protein 11 (TRIP-11) (Golgi-associated, microtubule-binding protein 210) (GMAP-210) (Trip230) (Clonal, evolution-related gene on chromosome 14).]                                                   | Go Component not found |
| Q15678 | [Tyrosine-protein phosphatase non-receptor type 14 (EC 3.1.3.48), (Protein-tyrosine phosphatase pez).]                                                                                                                            | Go Component not found |
| Q15697 | [Zinc finger protein 174 (AW-1) (Zinc finger and SCAN domain-containing, protein 8).]                                                                                                                                             | Go Component not found |
| Q15714 | [TSC22 domain family protein 1 (Transforming growth factor beta-1-, induced transcript 4 protein) (Regulatory protein TSC-22) (TGFB-, stimulated clone 22 homolog) (Cerebral protein 2).]                                         | Go Component not found |
| Q15746 | [Myosin light chain kinase, smooth muscle (EC 2.7.11.18) (MLCK), (Telokin) (Kinase-related protein) (KRP).]                                                                                                                       | Go Component not found |
| Q15811 | Intersectin-1 (SH3 domain-containing protein 1A) (SH3P17).                                                                                                                                                                        | Go Component not found |
| Q15833 | Syntaxin-binding protein 2 (Unc-18 homolog 2) (Unc-18B) (Unc18-2).                                                                                                                                                                | Go Component not found |

|        |                                                                                                                                                                                                                                                                                                                                   |                        |
|--------|-----------------------------------------------------------------------------------------------------------------------------------------------------------------------------------------------------------------------------------------------------------------------------------------------------------------------------------|------------------------|
| Q15973 | Zinc finger protein 124 (HZF-16).                                                                                                                                                                                                                                                                                                 | Go Component not found |
| Q16254 | Transcription factor E2F4 (E2F-4).                                                                                                                                                                                                                                                                                                | Go Component not found |
| Q16533 | [snRNA-activating protein complex subunit 1 (SNAPc subunit 1) (snRNA-, activating protein complex 43 kDa subunit) (SNAPc 43 kDa subunit), (Small nuclear RNA-activating complex polypeptide 1) (Proximal, sequence element-binding transcription factor subunit gamma) (PSE-, binding factor subunit gamma) (PTF subunit gamma).] | Go Component not found |
| Q16589 | Cyclin-G2.                                                                                                                                                                                                                                                                                                                        | Go Component not found |
| Q16659 | [Mitogen-activated protein kinase 6 (EC 2.7.11.24) (Extracellular, signal-regulated kinase 3) (ERK-3) (MAP kinase isoform p97) (p97-, MAPK).]                                                                                                                                                                                     | Go Component not found |
| Q16671 | [Anti-Muellerian hormone type-2 receptor precursor (EC 2.7.11.30), (Anti-Muellerian hormone type II receptor) (AMH type II receptor) (MIS, type II receptor) (MISRII) (MRII).]                                                                                                                                                    | Go Component not found |
| Q16690 | [Dual specificity protein phosphatase 5 (EC 3.1.3.48) (EC 3.1.3.16), (Dual specificity protein phosphatase hVH3).]                                                                                                                                                                                                                | Go Component not found |
| Q16719 | Kynureninase (EC 3.7.1.3) (L-kynurenine hydrolase).                                                                                                                                                                                                                                                                               | Go Component not found |
| Q16769 | [Glutaminy-peptide cyclotransferase precursor (EC 2.3.2.5) (QC), (Glutaminyl-tRNA cyclotransferase) (Glutaminy cyclase) (Glutamyl, cyclase) (EC).]                                                                                                                                                                                | Go Component not found |
| Q29865 | [HLA class I histocompatibility antigen, Cw-18 alpha chain precursor, (MHC class I antigen Cw*18).]                                                                                                                                                                                                                               | Go Component not found |
| Q6S8J3 | Prostate, ovary, testis-expressed protein on chromosome 2 (Fragment).                                                                                                                                                                                                                                                             | Go Component not found |
| Q86U42 | [Polyadenylate-binding protein 2 (Poly(A)-binding protein 2) (Poly(A)-, binding protein II) (PABII) (Polyadenylate-binding nuclear protein 1), (Nuclear poly(A)-binding protein 1).]                                                                                                                                              | Go Component not found |
| Q8TBG9 | Synaptoporin.                                                                                                                                                                                                                                                                                                                     | Go Component not found |
| Q92539 | Lipin-2.                                                                                                                                                                                                                                                                                                                          | Go Component not found |
| Q92544 | Transmembrane 9 superfamily protein member 4.                                                                                                                                                                                                                                                                                     | Go Component not found |
| Q92561 | [Phytanoyl-CoA hydroxylase-interacting protein (Phytanoyl-CoA, hydroxylase-associated protein 1) (PAHXAP1) (PAHX-AP1).]                                                                                                                                                                                                           | Go Component not found |
| Q92599 | Septin-8.                                                                                                                                                                                                                                                                                                                         | Go Component not found |
| Q92610 | Zinc finger protein 592.                                                                                                                                                                                                                                                                                                          | Go Component not found |
| Q92628 | Uncharacterized protein KIAA0232.                                                                                                                                                                                                                                                                                                 | Go Component not found |
| Q92667 | [A kinase anchor protein 1, mitochondrial precursor (Protein kinase A-, anchoring protein 1) (PRKA1) (A-kinase anchor protein 149 kDa) (AKAP, 149) (Dual specificity A-kinase-anchoring protein 1) (D-AKAP-1), (Spermatid A-kinase anchor protein 84) (S-AKAP84).]                                                                | Go Component not found |
| Q92696 | [Geranylgeranyl transferase type-2 subunit alpha (EC 2.5.1.60), (Geranylgeranyl transferase type II subunit alpha) (Rab, geranylgeranyltransferase subunit alpha) (Rab geranyl-, geranyltransferase subunit alpha) (Rab GG transferase alpha) (Rab, GGTase alpha).]                                                               | Go Component not found |
| Q92733 | [Proline-rich protein PRCC (Papillary renal cell carcinoma, translocation-associated gene protein).]                                                                                                                                                                                                                              | Go Component not found |
| Q92754 | [Transcription factor AP-2 gamma (AP2-gamma) (Activating enhancer-, binding protein 2 gamma) (Transcription factor ERF-1).]                                                                                                                                                                                                       | Go Component not found |
| Q92782 | [Zinc finger protein neuro-d4 (D4, zinc and double PHD fingers family, 1).]                                                                                                                                                                                                                                                       | Go Component not found |
| Q92800 | Enhancer of zeste homolog 1 (ENX-2).                                                                                                                                                                                                                                                                                              | Go Component not found |
| Q92820 | [Gamma-glutamyl hydrolase precursor (EC 3.4.19.9) (Gamma-Glu-X, carboxypeptidase) (Conjugase) (GH).]                                                                                                                                                                                                                              | Go Component not found |
| Q92830 | [General control of amino acid synthesis protein 5-like 2 (EC 2.3.1.48), (Histone acetyltransferase GCN5) (hsGCN5) (STAF97).]                                                                                                                                                                                                     | Go Component not found |
| Q92854 | [Semaphorin-4D precursor (Leukocyte activation antigen CD100) (BB18), (A8) (GR3).]                                                                                                                                                                                                                                                | Go Component not found |
| Q92914 | [Fibroblast growth factor 11 (FGF-11) (Fibroblast growth factor, homologous factor 3) (FHF-3).]                                                                                                                                                                                                                                   | Go Component not found |

|        |                                                                                                                                                                                                                                                                                |                        |
|--------|--------------------------------------------------------------------------------------------------------------------------------------------------------------------------------------------------------------------------------------------------------------------------------|------------------------|
| O75949 | Transmembrane protein 28 (TED protein).                                                                                                                                                                                                                                        | Go Component not found |
| O75969 | [A-kinase anchor protein 3 (Protein kinase A-anchoring protein 3), (PRKA3) (A-kinase anchor protein 110 kDa) (AKAP 110) (Sperm oocyte-, binding protein) (Fibrousheathin-1) (Fibrousheathin I) (Fibrous sheath, protein of 95 kDa) (FSP95) (Cancer/testis antigen 82) (CT82).] | Go Component not found |
| O76041 | Nebulette (Actin-binding Z-disk protein).                                                                                                                                                                                                                                      | Go Component not found |
| O76094 | Signal recognition particle 72 kDa protein (SRP72).                                                                                                                                                                                                                            | Go Component not found |
| O94788 | [Retinal dehydrogenase 2 (EC 1.2.1.36) (RalDH2) (RALDH 2) (RALDH(II)), (Retinaldehyde-specific dehydrogenase type 2) (Aldehyde dehydrogenase, family 1 member A2).]                                                                                                            | Go Component not found |
| O94810 | Regulator of G-protein signaling 11 (RGS11).                                                                                                                                                                                                                                   | Go Component not found |
| O94823 | Probable phospholipid-transporting ATPase VB (EC 3.6.3.1).                                                                                                                                                                                                                     | Go Component not found |
| O94876 | Transmembrane and coiled-coil domains protein 1.                                                                                                                                                                                                                               | Go Component not found |
| O94956 | [Solute carrier organic anion transporter family member 2B1 (Solute, carrier family 21 member 9) (Organic anion transporter B) (OATP-B), (Organic anion transporter polypeptide-related protein 2) (OATP-RP2), (OATPRP2).]                                                     | Go Component not found |
| O95007 | Olfactory receptor 6B1 (Olfactory receptor 7-3) (OR7-3).                                                                                                                                                                                                                       | Go Component not found |
| O95049 | [Tight junction protein ZO-3 (Zonula occludens protein 3) (Zona, occludens protein 3) (Tight junction protein 3).]                                                                                                                                                             | Go Component not found |
| O95125 | [Zinc finger protein 202 (Zinc finger protein with KRAB and SCAN, domains 10).]                                                                                                                                                                                                | Go Component not found |
| O95359 | [Transforming acidic coiled-coil-containing protein 2 (Anti Zuai-1), (AZU-1).]                                                                                                                                                                                                 | Go Component not found |
| O95393 | Bone morphogenetic protein 10 precursor (BMP-10).                                                                                                                                                                                                                              | Go Component not found |
| O95479 | [GDH/6PGL endoplasmic bifunctional protein precursor [Includes: Glucose, 1-dehydrogenase (EC 1.1.1.47) (Hexose-6-phosphate dehydrogenase); 6-, phosphogluconolactonase (EC 3.1.1.31) (6PGL)].]                                                                                 | Go Component not found |
| O95521 | PRAME family member 1.                                                                                                                                                                                                                                                         | Go Component not found |
| O95716 | Ras-related protein Rab-3D.                                                                                                                                                                                                                                                    | Go Component not found |
| O95897 | Noelin-2 precursor (Olfactomedin-2).                                                                                                                                                                                                                                           | Go Component not found |
| O95936 | Eomesodermin homolog.                                                                                                                                                                                                                                                          | Go Component not found |
| O95988 | [T-cell leukemia/lymphoma protein 1B (Oncogene TCL1B), (Syncytiotrophoblast-specific protein) (SYN-1).]                                                                                                                                                                        | Go Component not found |
| O96014 | Protein Wnt-11 precursor.                                                                                                                                                                                                                                                      | Go Component not found |
| P25440 | Bromodomain-containing protein 2 (Protein RING3) (O27.1.1).                                                                                                                                                                                                                    | Go Component not found |
| P00439 | [Phenylalanine-4-hydroxylase (EC 1.14.16.1) (PAH) (Phe-4-, monooxygenase).]                                                                                                                                                                                                    | Go Component not found |
| P00540 | [Proto-oncogene serine/threonine-protein kinase mos (EC 2.7.11.1) (c-, mos) (Oocyte maturation factor mos).]                                                                                                                                                                   | Go Component not found |
| P00751 | [Complement factor B precursor (EC 3.4.21.47) (C3/C5 convertase), (Properdin factor B) (Glycine-rich beta glycoprotein) (GBG) (PBF2), [Contains: Complement factor B Ba fragment; Complement factor B Bb, fragment].]                                                          | Go Component not found |
| P01569 | [Interferon alpha-5 precursor (Interferon alpha-G) (LeIF G) (Interferon, alpha-61).]                                                                                                                                                                                           | Go Component not found |
| P01579 | Interferon gamma precursor (IFN-gamma) (Immune interferon).                                                                                                                                                                                                                    | Go Component not found |
| P01916 | HLA class II histocompatibility antigen, SB beta chain (Fragment).                                                                                                                                                                                                             | Go Component not found |
| P02458 | [Collagen alpha-1(II) chain precursor (Alpha-1 type II collagen), [Contains: Chondrocalcin].]                                                                                                                                                                                  | Go Component not found |
| P02689 | Myelin P2 protein.                                                                                                                                                                                                                                                             | Go Component not found |
| P02771 | [Alpha-fetoprotein precursor (Alpha-fetoglobulin) (Alpha-1-, fetoprotein).]                                                                                                                                                                                                    | Go Component not found |
| P04040 | Catalase (EC 1.11.1.6).                                                                                                                                                                                                                                                        | Go Component not found |

|        |                                                                                                                                                                                                                                                                                                                                                                                                                                                                                    |                        |
|--------|------------------------------------------------------------------------------------------------------------------------------------------------------------------------------------------------------------------------------------------------------------------------------------------------------------------------------------------------------------------------------------------------------------------------------------------------------------------------------------|------------------------|
| P04062 | [Glucosylceramidase precursor (EC 3.2.1.45) (Beta-glucocerebrosidase), (Acid beta-glucosidase) (D-glucosyl-N-acylsphingosine glucohydrolase), (Alglucerase) (Imiglucerase).]                                                                                                                                                                                                                                                                                                       | Go Component not found |
| P04075 | [Fructose-bisphosphate aldolase A (EC 4.1.2.13) (Muscle-type aldolase), (Lung cancer antigen NY-LU-1).]                                                                                                                                                                                                                                                                                                                                                                            | Go Component not found |
| P04085 | [Platelet-derived growth factor A chain precursor (PDGF A-chain), (Platelet-derived growth factor alpha polypeptide) (PDGF-1).]                                                                                                                                                                                                                                                                                                                                                    | Go Component not found |
| P04350 | Tubulin beta-4 chain (Tubulin 5 beta).                                                                                                                                                                                                                                                                                                                                                                                                                                             | Go Component not found |
| P04798 | [Cytochrome P450 1A1 (EC 1.14.14.1) (CYPIA1) (P450-P1) (P450 form 6), (P450-C).]                                                                                                                                                                                                                                                                                                                                                                                                   | Go Component not found |
| P04899 | [Guanine nucleotide-binding protein G(i), alpha-2 subunit (Adenylate, cyclase-inhibiting G alpha protein).]                                                                                                                                                                                                                                                                                                                                                                        | Go Component not found |
| P05019 | [Insulin-like growth factor IB precursor (IGF-IB) (Somatomedin-C), (Mechano growth factor) (MGF).]                                                                                                                                                                                                                                                                                                                                                                                 | Go Component not found |
| P05120 | [Plasminogen activator inhibitor 2 precursor (PAI-2) (Placental, plasminogen activator inhibitor) (Monocyte Arg-serpin) (Urokinase, inhibitor).]                                                                                                                                                                                                                                                                                                                                   | Go Component not found |
| P05162 | [Galactin-2 (Beta-galactoside-binding lectin L-14-II) (Lactose-binding, lectin 2) (S-Lac lectin 2) (HL14).]                                                                                                                                                                                                                                                                                                                                                                        | Go Component not found |
| P05181 | Cytochrome P450 2E1 (EC 1.14.14.1) (CYP1IE1) (P450-J).                                                                                                                                                                                                                                                                                                                                                                                                                             | Go Component not found |
| P05534 | [HLA class I histocompatibility antigen, A-24 alpha chain precursor, (MHC class I antigen A*24) (Aw-24) (A-9).]                                                                                                                                                                                                                                                                                                                                                                    | Go Component not found |
| P05937 | [Calbindin (Vitamin D-dependent calcium-binding protein, avian-type), (Calbindin D28) (D-28K).]                                                                                                                                                                                                                                                                                                                                                                                    | Go Component not found |
| P06737 | Glycogen phosphorylase, liver form (EC 2.4.1.1).                                                                                                                                                                                                                                                                                                                                                                                                                                   | Go Component not found |
| P07315 | [Gamma-crystallin C (Gamma-C-crystallin) (Gamma-crystallin 2-1) (Gamma-, crystallin 3).]                                                                                                                                                                                                                                                                                                                                                                                           | Go Component not found |
| P07360 | Complement component C8 gamma chain precursor.                                                                                                                                                                                                                                                                                                                                                                                                                                     | Go Component not found |
| P07451 | [Carbonic anhydrase 3 (EC 4.2.1.1) (Carbonic anhydrase III) (Carbonate, dehydratase III) (CA-III).]                                                                                                                                                                                                                                                                                                                                                                                | Go Component not found |
| P07737 | Profilin-1 (Profilin I).                                                                                                                                                                                                                                                                                                                                                                                                                                                           | Go Component not found |
| P21506 | Zinc finger protein 10 (Zinc finger protein KOX1).                                                                                                                                                                                                                                                                                                                                                                                                                                 | Go Component not found |
| P22102 | [Trifunctional purine biosynthetic protein adenosine-3 [Includes:, Phosphoribosylamine--glycine ligase (EC 6.3.4.13) (GARS) (Glycinamide, ribonucleotide synthetase) (Phosphoribosylglycinamide synthetase);, Phosphoribosylformylglycinamide cyclo-ligase (EC 6.3.3.1) (AIRS), (Phosphoribosyl-aminoimidazole synthetase) (AIR synthase);, Phosphoribosylglycinamide formyltransferase (EC 2.1.2.2) (GART) (GAR, transformylase) (5'-phosphoribosylglycinamide transformylase)].] | Go Component not found |
| P22612 | [cAMP-dependent protein kinase, gamma-catalytic subunit (EC 2.7.11.11), (PKA C-gamma).]                                                                                                                                                                                                                                                                                                                                                                                            | Go Component not found |
| P22670 | MHC class II regulatory factor RFX1 (RFX) (Enhancer factor C) (EF-C).                                                                                                                                                                                                                                                                                                                                                                                                              | Go Component not found |
| P22736 | [Orphan nuclear receptor NR4A1 (Orphan nuclear receptor HMR) (Early, response protein NAK1) (TR3 orphan receptor) (ST-59).]                                                                                                                                                                                                                                                                                                                                                        | Go Component not found |
| P23109 | [AMP deaminase 1 (EC 3.5.4.6) (Myoadenylate deaminase) (AMP deaminase, isoform M).]                                                                                                                                                                                                                                                                                                                                                                                                | Go Component not found |
| P23193 | [Transcription elongation factor A protein 1 (Transcription elongation, factor S-II protein 1) (Transcription elongation factor TFIIIS.o).]                                                                                                                                                                                                                                                                                                                                        | Go Component not found |
| P23443 | [Ribosomal protein S6 kinase beta-1 (EC 2.7.11.1) (Ribosomal protein S6, kinase I) (S6K) (S6K1) (70 kDa ribosomal protein S6 kinase 1) (p70 S6, kinase alpha) (p70(S6K)-alpha) (p70-S6K) (P70S6K) (p70-alpha).]                                                                                                                                                                                                                                                                    | Go Component not found |
| P23469 | [Receptor-type tyrosine-protein phosphatase epsilon precursor, (EC 3.1.3.48) (Protein-tyrosine phosphatase epsilon) (R-PTP-epsilon).]                                                                                                                                                                                                                                                                                                                                              | Go Component not found |
| P23760 | Paired box protein Pax-3 (HUP2).                                                                                                                                                                                                                                                                                                                                                                                                                                                   | Go Component not found |
| P23919 | Thymidylate kinase (EC 2.7.4.9) (dTMP kinase).                                                                                                                                                                                                                                                                                                                                                                                                                                     | Go Component not found |
| P24278 | [Zinc finger and BTB domain-containing protein 25 (Zinc finger protein, 46) (Zinc finger protein KUP).]                                                                                                                                                                                                                                                                                                                                                                            | Go Component not found |
| P80192 | [Mitogen-activated protein kinase kinase kinase 9 (EC 2.7.11.25) (Mixed, lineage kinase 1).]                                                                                                                                                                                                                                                                                                                                                                                       | Go Component not found |
| P26045 | [Tyrosine-protein phosphatase non-receptor type 3 (EC 3.1.3.48), (Protein-tyrosine phosphatase H1) (PTP-H1).]                                                                                                                                                                                                                                                                                                                                                                      | Go Component not found |

|        |                                                                                                                                                                                                                                                      |                        |
|--------|------------------------------------------------------------------------------------------------------------------------------------------------------------------------------------------------------------------------------------------------------|------------------------|
| P26951 | [Interleukin-3 receptor alpha chain precursor (IL-3R-alpha) (CD123, antigen).]                                                                                                                                                                       | Go Component not found |
| P27448 | [MAP/microtubule affinity-regulating kinase 3 (EC 2.7.11.1) (Cdc25C-, associated protein kinase 1) (cTAK1) (C-TAK1) (Serine/threonine, protein kinase p78) (Ser/Thr protein kinase PAR-1) (Protein kinase, STK10).]                                  | Go Component not found |
| P28039 | [Acyloxyacyl hydrolase precursor (EC 3.1.1.77) [Contains: Acyloxyacyl, hydrolase small subunit; Acyloxyacyl hydrolase large subunit].]                                                                                                               | Go Component not found |
| P28069 | [Pituitary-specific positive transcription factor 1 (Pit-1) (Growth, hormone factor 1) (GHF-1).]                                                                                                                                                     | Go Component not found |
| P28328 | [Peroxisome assembly factor 1 (PAF-1) (Peroxin-2) (Peroxisomal membrane, protein 3) (35 kDa peroxisomal membrane protein) (RING finger protein, 72).]                                                                                                | Go Component not found |
| P28335 | [5-hydroxytryptamine receptor 2C (5-HT-2C) (Serotonin receptor 2C) (5-, HT2C) (5-HTR2C) (5HT-1C).]                                                                                                                                                   | Go Component not found |
| P28347 | [Transcriptional enhancer factor TEF-1 (TEA domain family member 1), (TEAD-1) (Protein GT-IIc) (Transcription factor 13) (NTEF-1).]                                                                                                                  | Go Component not found |
| P28749 | [Retinoblastoma-like protein 1 (107 kDa retinoblastoma-associated, protein) (p107) (PRB1).]                                                                                                                                                          | Go Component not found |
| P28845 | [Corticosteroid 11-beta-dehydrogenase isozyme 1 (EC 1.1.1.146) (11-DH), (11-beta-hydroxysteroid dehydrogenase 1) (11-beta-HSD1).]                                                                                                                    | Go Component not found |
| P29084 | [Transcription initiation factor IIE subunit beta (TFIIE-beta) (General, transcription factor IIE subunit 2).]                                                                                                                                       | Go Component not found |
| P29401 | Transketolase (EC 2.2.1.1) (TK).                                                                                                                                                                                                                     | Go Component not found |
| P29466 | [Caspase-1 precursor (EC 3.4.22.36) (CASP-1) (Interleukin-1 beta, convertase) (IL-1BC) (IL-1 beta-converting enzyme) (ICE) (Interleukin-, 1 beta-converting enzyme) (p45) [Contains: Caspase-1 subunit p20;, Caspase-1 subunit p10].]                | Go Component not found |
| P29597 | Non-receptor tyrosine-protein kinase TYK2 (EC 2.7.10.2).                                                                                                                                                                                             | Go Component not found |
| P29762 | [Cellular retinoic acid-binding protein 1 (Cellular retinoic acid-, binding protein I) (CRABP-I) (Retinoic acid-binding protein I, cellular).]                                                                                                       | Go Component not found |
| P30086 | [Phosphatidylethanolamine-binding protein 1 (PEBP-1) (Prostatic-binding, protein) (HCNPPp) (Neuropolypeptide h3) (Raf kinase inhibitor protein), (RKIP) [Contains: Hippocampal cholinergic neurostimulating peptide, (HCNP)].]                       | Go Component not found |
| P30419 | [Glycylpeptide N-tetradecanoyltransferase 1 (EC 2.3.1.97) (Peptide N-, myristoyltransferase 1) (Myristoyl-CoA:protein N-myristoyltransferase, 1) (NMT 1) (Type I N-myristoyltransferase).]                                                           | Go Component not found |
| P30464 | [HLA class I histocompatibility antigen, B-15 alpha chain precursor, (MHC class I antigen B*15).]                                                                                                                                                    | Go Component not found |
| P30613 | [Pyruvate kinase isozymes R/L (EC 2.7.1.40) (R-type/L-type pyruvate, kinase) (Red cell/liver pyruvate kinase) (Pyruvate kinase 1).]                                                                                                                  | Go Component not found |
| P30711 | [Glutathione S-transferase theta-1 (EC 2.5.1.18) (GST class-theta-1), (Glutathione transferase T1-1).]                                                                                                                                               | Go Component not found |
| P31274 | Homeobox protein Hox-C9 (Hox-3B).                                                                                                                                                                                                                    | Go Component not found |
| P31944 | [Caspase-14 precursor (EC 3.4.22.-) (CASP-14) [Contains: Caspase-14, subunit 1; Caspase-14 subunit 2].]                                                                                                                                              | Go Component not found |
| P32314 | Forkhead box protein N2 (Human T-cell leukemia virus enhancer factor).                                                                                                                                                                               | Go Component not found |
| P32926 | Desmoglein-3 precursor (130 kDa pemphigus vulgaris antigen) (PVA).                                                                                                                                                                                   | Go Component not found |
| P33076 | MHC class II transactivator (CIITA).                                                                                                                                                                                                                 | Go Component not found |
| P35913 | [Rod cGMP-specific 3',5'-cyclic phosphodiesterase subunit beta, precursor (EC 3.1.4.35) (GMP-PDE beta).]                                                                                                                                             | Go Component not found |
| P36941 | [Tumor necrosis factor receptor superfamily member 3 precursor, (Lymphotoxin-beta receptor) (Tumor necrosis factor receptor 2-related, protein) (Tumor necrosis factor C receptor).]                                                                 | Go Component not found |
| P36957 | [Dihydrolipoyllysine-residue succinyltransferase component of 2-, oxoglutarate dehydrogenase complex, mitochondrial precursor, (EC 2.3.1.61) (Dihydrolipoamide succinyltransferase component of 2-, oxoglutarate dehydrogenase complex) (E2) (E2K).] | Go Component not found |
| P36980 | [Complement factor H-related protein 2 precursor (FHR-2) (H factor-like, protein 2) (H factor-like 3) (DDESK59).]                                                                                                                                    | Go Component not found |
| P37275 | [Zinc finger E-box-binding homeobox 1 (Transcription factor 8) (NIL-2-A, zinc finger protein) (Negative regulator of IL2).]                                                                                                                          | Go Component not found |

|        |                                                                                                                                                                                                                                                      |                        |
|--------|------------------------------------------------------------------------------------------------------------------------------------------------------------------------------------------------------------------------------------------------------|------------------------|
| P39900 | [Macrophage metalloelastase precursor (EC 3.4.24.65) (HME) (Matrix, metalloproteinase-12) (MMP-12) (Macrophage elastase) (ME).]                                                                                                                      | Go Component not found |
| P40939 | [Trifunctional enzyme subunit alpha, mitochondrial precursor (TP-alpha), (78 kDa gastrin-binding protein) [Includes: Long-chain enoyl-CoA, hydratase (EC 4.2.1.17); Long chain 3-hydroxyacyl-CoA dehydrogenase, (EC 1.1.1.211)].]                    | Go Component not found |
| P41218 | Myeloid cell nuclear differentiation antigen.                                                                                                                                                                                                        | Go Component not found |
| P58173 | [Olfactory receptor 2B6 (Olfactory receptor OR6-4) (Olfactory receptor, 6-31) (OR6-31) (Olfactory receptor 5-40) (OR5-40) (Hs6M1-32).]                                                                                                               | Go Component not found |
| P58397 | [ADAMTS-12 precursor (EC 3.4.24.-) (A disintegrin and metalloproteinase, with thrombospondin motifs 12) (ADAM-TS 12) (ADAM-TS12).]                                                                                                                   | Go Component not found |
| P61011 | Signal recognition particle 54 kDa protein (SRP54).                                                                                                                                                                                                  | Go Component not found |
| P61086 | [Ubiquitin-conjugating enzyme E2-25 kDa (EC 6.3.2.19) (Ubiquitin-, protein ligase) (Ubiquitin carrier protein) (E2(25K)) (Huntingtin-, interacting protein 2) (HIP-2).]                                                                              | Go Component not found |
| P61244 | Protein max (Myc-associated factor X).                                                                                                                                                                                                               | Go Component not found |
| P61513 | 60S ribosomal protein L37a.                                                                                                                                                                                                                          | Go Component not found |
| P62906 | [60S ribosomal protein L10a (CSA-19) (Protein NEDD6) (Neural precursor, cell expressed developmentally down-regulated protein 6) (NEDD-6).]                                                                                                          | Go Component not found |
| P63010 | [AP-2 complex subunit beta-1 (Adapter-related protein complex 2 beta-1, subunit) (Beta-adaptin) (Plasma membrane adaptor HA2/AP2 adaptin beta, subunit) (Clathrin assembly protein complex 2 beta large chain), (AP105B).]                           | Go Component not found |
| P63208 | [S-phase kinase-associated protein 1A (Cyclin A/CDK2-associated protein, p19) (p19A) (p19skp1) (RNA polymerase II elongation factor-like, protein) (Organ of Corti protein 2) (OCP-II protein) (OCP-2), (Transcription elongation factor B) (SIII).] | Go Component not found |
| P67812 | [Signal peptidase complex catalytic subunit SEC11A (EC 3.4.-.-) (SEC11, homolog A) (SEC11-like protein 1) (Microsomal signal peptidase 18 kDa, subunit) (SPase 18 kDa subunit) (SPC18) (Endopeptidase SP18).]                                        | Go Component not found |
| P69892 | [Hemoglobin subunit gamma-2 (Hemoglobin gamma-2 chain) (Gamma-2-globin), (Hemoglobin gamma-G chain) (Hb F Ggamma).]                                                                                                                                  | Go Component not found |
| P78314 | SH3 domain-binding protein 2 (3BP-2).                                                                                                                                                                                                                | Go Component not found |
| P78413 | [Iroquois-class homeodomain protein IRX-4 (Iroquois homeobox protein 4), (Homeodomain protein IRXA3).]                                                                                                                                               | Go Component not found |
| P78527 | [DNA-dependent protein kinase catalytic subunit (EC 2.7.11.1) (DNA-PK, catalytic subunit) (DNA-PKcs) (DNPK1) (p460).]                                                                                                                                | Go Component not found |
| P78560 | [Death domain-containing protein CRADD (Caspase and RIP adapter with, death domain) (RIP-associated protein with a death domain).]                                                                                                                   | Go Component not found |
| P80075 | [Small-inducible cytokine A8 precursor (CCL8) (Monocyte chemotactic, protein 2) (MCP-2) (Monocyte chemoattractant protein 2) (HC14), [Contains: MCP-2(6-76)].]                                                                                       | Go Component not found |
| Q9BY50 | [Signal peptidase complex catalytic subunit SEC11C (EC 3.4.-.-) (SEC11, homolog C) (SEC11-like protein 3) (Microsomal signal peptidase 21 kDa, subunit) (SPase 21 kDa subunit) (SPC21).]                                                             | Go Component not found |
| Q9BZ11 | [Iroquois-class homeodomain protein IRX-2 (Iroquois homeobox protein 2), (Homeodomain protein IRXA2).]                                                                                                                                               | Go Component not found |
| P83105 | Probable serine protease HTRA4 precursor (EC 3.4.21.-).                                                                                                                                                                                              | Go Component not found |
| P84090 | Enhancer of rudimentary homolog.                                                                                                                                                                                                                     | Go Component not found |
| P98066 | [Tumor necrosis factor-inducible protein TSG-6 precursor (TNF-, stimulated gene 6 protein) (Tumor necrosis factor, alpha-induced, protein 6) (Hyaluronate-binding protein).]                                                                         | Go Component not found |
| P98160 | [Basement membrane-specific heparan sulfate proteoglycan core protein, precursor (HSPG) (Perlecan) (PLC).]                                                                                                                                           | Go Component not found |
| P98196 | [Probable phospholipid-transporting ATPase IH (EC 3.6.3.1) (ATPase, class I type 11A) (ATPase IS).]                                                                                                                                                  | Go Component not found |
| Q00526 | Cell division protein kinase 3 (EC 2.7.11.22).                                                                                                                                                                                                       | Go Component not found |

|        |                                                                                                                                                                                                                                                         |                        |
|--------|---------------------------------------------------------------------------------------------------------------------------------------------------------------------------------------------------------------------------------------------------------|------------------------|
| Q00536 | [Serine/threonine-protein kinase PCTAIRE-1 (EC 2.7.11.22) (PCTAIRE-, motif protein kinase 1).]                                                                                                                                                          | Go Component not found |
| Q00722 | [1-phosphatidylinositol-4,5-bisphosphate phosphodiesterase beta-2, (EC 3.1.4.11) (Phosphoinositide phospholipase C) (Phospholipase C-, beta-2) (PLC-beta-2).]                                                                                           | Go Component not found |
| Q00887 | [Pregnancy-specific beta-1-glycoprotein 9 precursor (PSBG-9), (Pregnancy-specific glycoprotein 9) (Pregnancy-specific beta-1, glycoprotein B) (PS-beta-B) (PS34) (Pregnancy-specific glycoprotein 7), (PSG7).]                                          | Go Component not found |
| Q01064 | [Calcium/calmodulin-dependent 3',5'-cyclic nucleotide phosphodiesterase, 1B (EC 3.1.4.17) (Cam-PDE 1B) (63 kDa Cam-PDE).]                                                                                                                               | Go Component not found |
| Q01118 | [Sodium channel protein type 7 subunit alpha (Sodium channel protein, type VII subunit alpha) (Putative voltage-gated sodium channel alpha, subunit Nax) (Sodium channel protein cardiac and skeletal muscle, subunit alpha).]                          | Go Component not found |
| Q01433 | AMP deaminase 2 (EC 3.5.4.6) (AMP deaminase isoform L).                                                                                                                                                                                                 | Go Component not found |
| Q01524 | Defensin-6 precursor (Defensin, alpha 6).                                                                                                                                                                                                               | Go Component not found |
| Q01740 | [Dimethylaniline monooxygenase [N-oxide-forming] 1 (EC 1.14.13.8), (Fetal hepatic flavin-containing monooxygenase 1) (FMO 1), (Dimethylaniline oxidase 1).]                                                                                             | Go Component not found |
| Q01851 | [POU domain, class 4, transcription factor 1 (Brain-specific, homeobox/POU domain protein 3A) (Brn-3A) (Oct-T1) (Homeobox/POU domain, protein RDC-1).]                                                                                                  | Go Component not found |
| Q02218 | [2-oxoglutarate dehydrogenase E1 component, mitochondrial precursor, (EC 1.2.4.2) (Alpha-ketoglutarate dehydrogenase).]                                                                                                                                 | Go Component not found |
| Q02575 | [Helix-loop-helix protein 1 (HEN1) (Nescient helix loop helix 1) (NSCL-, 1).]                                                                                                                                                                           | Go Component not found |
| Q02809 | [Procollagen-lysine,2-oxoglutarate 5-dioxygenase 1 precursor, (EC 1.14.11.4) (Lysyl hydroxylase 1) (LH1).]                                                                                                                                              | Go Component not found |
| Q03013 | [Glutathione S-transferase Mu 4 (EC 2.5.1.18) (GSTM4-4) (GST class-mu, 4) (GTS-Mu2).]                                                                                                                                                                   | Go Component not found |
| Q04446 | [1,4-alpha-glucan-branching enzyme (EC 2.4.1.18) (Glycogen-branching, enzyme) (Brancher enzyme).]                                                                                                                                                       | Go Component not found |
| Q05193 | Dynamin-1 (EC 3.6.5.5).                                                                                                                                                                                                                                 | Go Component not found |
| Q05524 | [Alpha-enolase, lung specific (EC 4.2.1.11) (2-phospho-D-glycerate, hydro-lyase) (Non-neural enolase) (NNE) (Phosphopyruvate hydratase), (HLE1).]                                                                                                       | Go Component not found |
| Q06124 | [Tyrosine-protein phosphatase non-receptor type 11 (EC 3.1.3.48), (Protein-tyrosine phosphatase 2C) (PTP-2C) (PTP-1D) (SH-PTP3) (SH-, PTP2) (SHP-2) (Shp2).]                                                                                            | Go Component not found |
| Q06203 | [Amidophosphoribosyltransferase precursor (EC 2.4.2.14) (Glutamine, phosphoribosylpyrophosphate amidotransferase) (ATase) (GPAT).]                                                                                                                      | Go Component not found |
| Q06278 | Aldehyde oxidase (EC 1.2.3.1).                                                                                                                                                                                                                          | Go Component not found |
| Q06945 | Transcription factor SOX-4.                                                                                                                                                                                                                             | Go Component not found |
| Q07889 | Son of sevenless homolog 1 (SOS-1).                                                                                                                                                                                                                     | Go Component not found |
| Q08623 | [Haloacid dehalogenase-like hydrolase domain-containing protein 1A (GS1, protein).]                                                                                                                                                                     | Go Component not found |
| Q08881 | [Tyrosine-protein kinase ITK/TSK (EC 2.7.10.2) (T-cell-specific kinase), (Tyrosine-protein kinase Lyk) (Kinase EMT).]                                                                                                                                   | Go Component not found |
| Q10567 | [AP-1 complex subunit beta-1 (Adapter-related protein complex 1 beta-1, subunit) (Beta-adaptin 1) (Adaptor protein complex AP-1 beta-1, subunit) (Golgi adaptor HA1/AP1 adaptin beta subunit) (Clathrin, assembly protein complex 1 beta large chain).] | Go Component not found |
| Q12756 | [Kinesin-like protein KIF1A (Axonal transporter of synaptic vesicles), (Microtubule-based motor KIF1A) (UNC-104- and KIF1A-related protein), (hUNC-104).]                                                                                               | Go Component not found |
| Q12768 | Strumpellin.                                                                                                                                                                                                                                            | Go Component not found |
| Q12772 | [Sterol regulatory element-binding protein 2 (SREBP-2) (Sterol, regulatory element-binding transcription factor 2).]                                                                                                                                    | Go Component not found |
| Q12901 | Zinc finger protein 155.                                                                                                                                                                                                                                | Go Component not found |
| Q12929 | Epidermal growth factor receptor kinase substrate 8.                                                                                                                                                                                                    | Go Component not found |



|        |                                                                                                                                                                                                                                                                                                        |                        |
|--------|--------------------------------------------------------------------------------------------------------------------------------------------------------------------------------------------------------------------------------------------------------------------------------------------------------|------------------------|
| Q12988 | Heat shock protein beta-3 (HspB3) (Heat shock 17 kDa protein).                                                                                                                                                                                                                                         | Go Component not found |
| Q13057 | [Bifunctional coenzyme A synthase (CoA synthase) (NBP) (POV-2), [Includes: Phosphopantetheine adenyltransferase (EC 2.7.7.3), (Pantetheine-phosphate adenyltransferase) (PPAT) (Dephospho-CoA, pyrophosphorylase); Dephospho-CoA kinase (EC 2.7.1.24) (DPCK), (Dephosphocoenzyme A kinase) (DPCOAK)].] | Go Component not found |
| Q13085 | [Acetyl-CoA carboxylase 1 (EC 6.4.1.2) (ACC-alpha) [Includes: Biotin, carboxylase (EC 6.3.4.14)].]                                                                                                                                                                                                     | Go Component not found |
| Q13105 | [Zinc finger and BTB domain-containing protein 17 (Zinc finger protein, 60) (Zinc finger protein 151) (Myc-interacting zinc finger protein), (Miz-1).]                                                                                                                                                 | Go Component not found |
| Q13155 | Multisynthetase complex auxiliary component p38 (Protein JTV-1).                                                                                                                                                                                                                                       | Go Component not found |
| Q13228 | Selenium-binding protein 1 (56 kDa selenium-binding protein) (SP56).                                                                                                                                                                                                                                   | Go Component not found |
| Q13243 | [Splicing factor, arginine/serine-rich 5 (Pre-mRNA-splicing factor, SRP40) (Delayed-early protein HRS).]                                                                                                                                                                                               | Go Component not found |
| Q13277 | Syntaxin-3.                                                                                                                                                                                                                                                                                            | Go Component not found |
| Q13361 | [Microfibrillar-associated protein 5 precursor (MFAP-5) (Microfibril-, associated glycoprotein 2) (MAGP-2) (MP25).]                                                                                                                                                                                    | Go Component not found |
| Q93050 | [Vacuolar proton translocating ATPase 116 kDa subunit a isoform 1 (V-, ATPase 116 kDa isoform a1) (Clathrin-coated vesicle/synaptic vesicle, proton pump 116 kDa subunit) (Vacuolar proton pump subunit 1), (Vacuolar adenosine triphosphatase subunit Ac116).]                                        | Go Component not found |
| Q93073 | Uncharacterized protein KIAA0256.                                                                                                                                                                                                                                                                      | Go Component not found |
| Q96DR5 | [Short palate, lung and nasal epithelium carcinoma-associated protein 2, precursor (Parotid secretory protein) (PSP).]                                                                                                                                                                                 | Go Component not found |
| Q96Q77 | [Calcium and integrin-binding family member 3 (Kinase-interacting, protein 3) (KIP 3).]                                                                                                                                                                                                                | Go Component not found |
| Q99594 | [Transcriptional enhancer factor TEF-5 (TEA domain family member 3), (TEAD-3) (DTEF-1).]                                                                                                                                                                                                               | Go Component not found |
| Q99687 | Homeobox protein Meis3 (Meis1-related protein 2).                                                                                                                                                                                                                                                      | Go Component not found |
| Q99704 | Docking protein 1 (Downstream of tyrosine kinase 1) (p62(dok)) (pp62).                                                                                                                                                                                                                                 | Go Component not found |
| Q99816 | Tumor susceptibility gene 101 protein.                                                                                                                                                                                                                                                                 | Go Component not found |
| Q99962 | [SH3-containing GRB2-like protein 2 (EC 2.3.1.-) (Endophilin-1), (Endophilin-A1) (SH3 domain protein 2A) (EEN-B1).]                                                                                                                                                                                    | Go Component not found |
| Q99985 | Semaphorin-3C precursor (Semaphorin E) (Sema E).                                                                                                                                                                                                                                                       | Go Component not found |
| Q9BWT3 | [Poly(A) polymerase gamma (EC 2.7.7.19) (PAP gamma) (Polynucleotide, adenyltransferase gamma) (SRP RNA 3'-adenylating enzyme) (Neo-, poly(A) polymerase) (Neo-PAP).]                                                                                                                                   | Go Component not found |
| Q9BXU1 | [Serine/threonine-protein kinase 31 (EC 2.7.11.1) (Serine/threonine-, protein kinase NYD-SPK) (Sugen kinase 396).]                                                                                                                                                                                     | Go Component not found |
| Q9GZR1 | [Sentrin-specific protease 6 (EC 3.4.22.-) (Sentrin/SUMO-specific, protease SENP6) (SUMO-1-specific protease 1).]                                                                                                                                                                                      | Go Component not found |
| Q9GZZ0 | Homeobox protein Hox-D1.                                                                                                                                                                                                                                                                               | Go Component not found |
| Q9H1J7 | Protein Wnt-5b precursor.                                                                                                                                                                                                                                                                              | Go Component not found |
| Q9H213 | [Melanoma-associated antigen H1 (MAGE-H1 antigen) (Restin) (Apoptosis-, related protein 1) (APR-1).]                                                                                                                                                                                                   | Go Component not found |
| Q9H3T3 | Semaphorin-6B precursor (Semaphorin Z) (Sema Z).                                                                                                                                                                                                                                                       | Go Component not found |
| Q9H4G0 | Band 4.1-like protein 1 (Neuronal protein 4.1) (4.1N).                                                                                                                                                                                                                                                 | Go Component not found |
| Q9H583 | HEAT repeat-containing protein 1 (Protein BAP28).                                                                                                                                                                                                                                                      | Go Component not found |
| Q9HA64 | [Ketosamine-3-kinase (EC 2.7.1.-) (Fructosamine-3-kinase-related, protein).]                                                                                                                                                                                                                           | Go Component not found |
| Q9HCF6 | [Transient receptor potential cation channel subfamily M member 3 (Long, transient receptor potential channel 3) (LTrpC3) (Melastatin-2), (MLSN2).]                                                                                                                                                    | Go Component not found |
| Q9HCM4 | Band 4.1-like protein 5.                                                                                                                                                                                                                                                                               | Go Component not found |

|        |                                                                                                                                                                                            |                        |
|--------|--------------------------------------------------------------------------------------------------------------------------------------------------------------------------------------------|------------------------|
| Q9NPC8 | Homeobox protein SIX2 (Sine oculis homeobox homolog 2).                                                                                                                                    | Go Component not found |
| Q9NQW5 | PR domain zinc finger protein 7 (PR domain-containing protein 7).                                                                                                                          | Go Component not found |
| Q9NQX4 | Myosin-Vc.                                                                                                                                                                                 | Go Component not found |
| Q9NS71 | [Gastrokine-1 precursor (18 kDa antrum mucosa protein) (AMP-18) (CA11, protein).]                                                                                                          | Go Component not found |
| Q9NTI2 | [Probable phospholipid-transporting ATPase IB (EC 3.6.3.1) (ATPase, class I type 8A member 2) (ML-1).]                                                                                     | Go Component not found |
| Q9NVD3 | SET domain-containing protein 4.                                                                                                                                                           | Go Component not found |
| Q9NXJ5 | [Pyroglutamyl-peptidase 1 (EC 3.4.19.3) (Pyroglutamyl-peptidase I), (Pyrrolidone-carboxylate peptidase) (5-oxopropyl-peptidase) (PGP-I).]                                                  | Go Component not found |
| Q9NY33 | [Dipeptidyl-peptidase 3 (EC 3.4.14.4) (Dipeptidyl-peptidase III) (DPP, III) (Dipeptidyl aminopeptidase III) (Dipeptidyl arylamidase III).]                                                 | Go Component not found |
| Q9NZB2 | UPF0318 protein FAM120A.                                                                                                                                                                   | Go Component not found |
| Q9P2G4 | Uncharacterized protein KIAA1383.                                                                                                                                                          | Go Component not found |
| Q9P2S2 | Neurexin-2-alpha precursor (Neurexin II-alpha).                                                                                                                                            | Go Component not found |
| Q9UBD5 | [Origin recognition complex subunit 3 (Origin recognition complex, subunit Latheo).]                                                                                                       | Go Component not found |
| Q9UBL9 | P2X purinoceptor 2 (ATP receptor) (P2X2) (Purinergic receptor).                                                                                                                            | Go Component not found |
| Q9UBR1 | [Beta-ureidopropionase (EC 3.5.1.6) (Beta-alanine synthase) (N-, carbamoyl-beta-alanine amidohydrolase) (BUP-1).]                                                                          | Go Component not found |
| Q9UDY2 | [Tight junction protein ZO-2 (Zonula occludens protein 2) (Zona, occludens protein 2) (Tight junction protein 2).]                                                                         | Go Component not found |
| Q9UET6 | [Putative ribosomal RNA methyltransferase 1 (EC 2.1.1.-) (rRNA, (uridine-2'-O-)-methyltransferase).]                                                                                       | Go Component not found |
| Q9UGF6 | Olfactory receptor 5V1 (Olfactory receptor OR6-26) (Hs6M1-21).                                                                                                                             | Go Component not found |
| Q9UGI9 | [5'-AMP-activated protein kinase subunit gamma-3 (AMPK gamma-3 chain), (AMPK gamma3).]                                                                                                     | Go Component not found |
| Q9UGM1 | [Neuronal acetylcholine receptor subunit alpha-9 precursor (Nicotinic, acetylcholine receptor subunit alpha 9) (NACHR alpha 9).]                                                           | Go Component not found |
| Q9UH03 | Neuronal-specific septin-3.                                                                                                                                                                | Go Component not found |
| Q9UHP3 | [Ubiquitin carboxyl-terminal hydrolase 25 (EC 3.1.2.15) (Ubiquitin, thioesterase 25) (Ubiquitin-specific-processing protease 25), (Deubiquitinating enzyme 25) (USP on chromosome 21).]    | Go Component not found |
| Q9UIC8 | [Leucine carboxyl methyltransferase 1 (EC 2.1.1.-) (Protein-leucine O-, methyltransferase).]                                                                                               | Go Component not found |
| Q9UJ42 | Probable G-protein coupled receptor 160.                                                                                                                                                   | Go Component not found |
| Q9UJW7 | Zinc finger protein 229.                                                                                                                                                                   | Go Component not found |
| Q9UK11 | Zinc finger protein 223.                                                                                                                                                                   | Go Component not found |
| Q9UK22 | F-box only protein 2.                                                                                                                                                                      | Go Component not found |
| Q9UK80 | [Ubiquitin carboxyl-terminal hydrolase 21 (EC 3.1.2.15) (Ubiquitin, thioesterase 21) (Ubiquitin-specific-processing protease 21), (Deubiquitinating enzyme 21) (NEDD8-specific protease).] | Go Component not found |
| Q9UKA4 | [A-kinase anchor protein 11 (Protein kinase A-anchoring protein 11), (PRKA11) (A kinase anchor protein 220 kDa) (AKAP 220) (hAKAP220).]                                                    | Go Component not found |
| Q9UKN7 | Myosin-XV (Unconventional myosin-15).                                                                                                                                                      | Go Component not found |
| Q9UKW4 | Protein vav-3.                                                                                                                                                                             | Go Component not found |
| Q9ULD4 | Bromodomain and PHD finger-containing protein 3.                                                                                                                                           | Go Component not found |
| Q9ULJ8 | [Neurabin-1 (Neurabin-I) (Neural tissue-specific F-actin-binding, protein I) (Protein phosphatase 1 regulatory subunit 9A).]                                                               | Go Component not found |
| Q9ULV0 | Myosin-Vb.                                                                                                                                                                                 | Go Component not found |
| Q9ULV5 | [Heat shock factor protein 4 (HSF 4) (Heat shock transcription factor, 4) (HSTF 4) (hHSF4).]                                                                                               | Go Component not found |

|        |                                                                                                                                                                                                                                                                                  |                        |
|--------|----------------------------------------------------------------------------------------------------------------------------------------------------------------------------------------------------------------------------------------------------------------------------------|------------------------|
| Q9ULX5 | [Zinc finger protein 179 (Brain finger protein) (RING finger protein, 112).]                                                                                                                                                                                                     | Go Component not found |
| Q9UMQ3 | Homeobox protein BarH-like 2.                                                                                                                                                                                                                                                    | Go Component not found |
| Q9UMX6 | [Guanylyl cyclase-activating protein 2 (GCAP 2) (Guanylate cyclase, activator 1B).]                                                                                                                                                                                              | Go Component not found |
| Q9UN79 | [SOX-13 protein (Type 1 diabetes autoantigen ICA12) (Islet cell antigen, 12).]                                                                                                                                                                                                   | Go Component not found |
| Q9UPM8 | [AP-4 complex subunit epsilon-1 (Adapter-related protein complex 4, subunit epsilon-1) (Epsilon subunit of AP-4) (AP-4 adapter complex, subunit epsilon).]                                                                                                                       | Go Component not found |
| Q9UPR5 | [Sodium/calcium exchanger 2 precursor (Na(+)/Ca(2+)-exchange protein, 2).]                                                                                                                                                                                                       | Go Component not found |
| Q9UPZ3 | [Hermansky-Pudlak syndrome 5 protein (Alpha-integrin-binding protein, 63) (Ruby-eye protein 2 homolog) (Ru2).]                                                                                                                                                                   | Go Component not found |
| Q9UQ72 | [Pregnancy-specific beta-1-glycoprotein 11 precursor (PSBG-11) (PSBG-, 13).]                                                                                                                                                                                                     | Go Component not found |
| Q9UQQ2 | [SH2B adapter protein 3 (Lymphocyte-specific adapter protein Lnk), (Signal transduction protein Lnk) (Lymphocyte adapter protein).]                                                                                                                                              | Go Component not found |
| Q9Y243 | [RAC-gamma serine/threonine-protein kinase (EC 2.7.11.1) (RAC-PK-gamma), (Protein kinase Akt-3) (Protein kinase B, gamma) (PKB gamma) (STK-2).]                                                                                                                                  | Go Component not found |
| Q9Y259 | [Choline/ethanolamine kinase [Includes: Choline kinase beta, (EC 2.7.1.32) (CK); Ethanolamine kinase (EC 2.7.1.82) (EK)].]                                                                                                                                                       | Go Component not found |
| Q9Y287 | [Integral membrane protein 2B (Transmembrane protein BRI) [Contains:, ABri/ADan amyloid peptide].]                                                                                                                                                                               | Go Component not found |
| Q9Y2D5 | [A-kinase anchor protein 2 (Protein kinase A-anchoring protein 2), (PRKA2) (AKAP-2) (AKAP-KL).]                                                                                                                                                                                  | Go Component not found |
| Q9Y2J0 | Rabphilin-3A (Exophilin-1).                                                                                                                                                                                                                                                      | Go Component not found |
| Q9Y2L6 | FERM domain-containing protein 4B (GRP1-binding protein GRSP1).                                                                                                                                                                                                                  | Go Component not found |
| Q9Y2N3 | [Nuclear envelope pore membrane protein POM 121 (Pore membrane protein, of 121 kDa) (P145).]                                                                                                                                                                                     | Go Component not found |
| Q9Y2Y9 | [Krueppel-like factor 13 (Transcription factor BTEB3) (Basic, transcription element-binding protein 3) (BTE-binding protein 3), (RANTES factor of late activated T-lymphocytes 1) (RFLAT-1), (Transcription factor NSLP1) (Novel Sp1-like zinc finger transcription, factor 1).] | Go Component not found |
| O15258 | Protein RER1.                                                                                                                                                                                                                                                                    | Golgi                  |
| O60499 | Syntaxin-10 (Syn10).                                                                                                                                                                                                                                                             | Golgi                  |
| O60763 | [General vesicular transport factor p115 (Protein USO1 homolog), (Transcytosis-associated protein) (TAP) (Vesicle-docking protein).]                                                                                                                                             | Golgi                  |
| P09958 | [Furin precursor (EC 3.4.21.75) (Paired basic amino acid residue, cleaving enzyme) (PACE) (Dibasic-processing enzyme).]                                                                                                                                                          | Golgi                  |
| P42356 | [Phosphatidylinositol 4-kinase alpha (EC 2.7.1.67) (PI4-kinase alpha), (PtdIns-4-kinase alpha) (PI4K-alpha).]                                                                                                                                                                    | Golgi                  |
| P40616 | ADP-ribosylation factor-like protein 1.                                                                                                                                                                                                                                          | Golgi                  |
| Q08378 | [Golgin subfamily A member 3 (Golgin-160) (Golgi complex-associated, protein of 170 kDa) (GCP170).]                                                                                                                                                                              | Golgi                  |
| Q9NQX7 | [Integral membrane protein 2C (Transmembrane protein BRI3) (Cerebral, protein 14) [Contains: CT-BRI3].]                                                                                                                                                                          | Golgi                  |
| Q9NWB1 | Ataxin-2-binding protein 1.                                                                                                                                                                                                                                                      | Golgi                  |
| O14662 | Syntaxin-16 (Syn16).                                                                                                                                                                                                                                                             | Golgi                  |
| Q92503 | SEC14-like protein 1.                                                                                                                                                                                                                                                            | Golgi                  |
| Q92538 | [Golgi-specific brefeldin A-resistance guanine nucleotide exchange, factor 1 (BFA-resistant GEF 1).]                                                                                                                                                                             | Golgi                  |
| O96013 | [Serine/threonine-protein kinase PAK 4 (EC 2.7.11.1) (p21-activated, kinase 4) (PAK-4).]                                                                                                                                                                                         | Golgi                  |
| P02751 | [Fibronectin precursor (FN) (Cold-insoluble globulin) (CIG) [Contains:, Ugl-Y1; Ugl-Y2; Ugl-Y3].]                                                                                                                                                                                | Golgi                  |
| P22460 | [Potassium voltage-gated channel subfamily A member 5 (Voltage-gated, potassium channel subunit Kv1.5) (HK2) (HPCN1).]                                                                                                                                                           | Golgi                  |

|        |                                                                                                                                                                                                                        |           |
|--------|------------------------------------------------------------------------------------------------------------------------------------------------------------------------------------------------------------------------|-----------|
| P31948 | [Stress-induced-phosphoprotein 1 (STI1) (Hsc70/Hsp90-organizing, protein) (Hop) (Transformation-sensitive protein IEF SSP 3521) (NY-, REN-11 antigen).]                                                                | Golgi     |
| P63092 | [Guanine nucleotide-binding protein G(s) subunit alpha isoforms short, (Adenylate cyclase-stimulating G alpha protein).]                                                                                               | Golgi     |
| P98174 | [FYVE, RhoGEF and PH domain-containing protein 1 (Faciogenital, dysplasia 1 protein) (Zinc finger FYVE domain-containing protein 3), (Rho/Rac guanine nucleotide exchange factor FGD1) (Rho/Rac GEF).]                 | Golgi     |
| P98194 | [Calcium-transporting ATPase type 2C member 1 (EC 3.6.3.8) (ATPase 2C1), (ATP-dependent Ca(2+) pump PMR1).]                                                                                                            | Golgi     |
| Q02818 | Nucleobindin-1 precursor (CALNUC).                                                                                                                                                                                     | Golgi     |
| Q11130 | [Alpha-(1,3)-fucosyltransferase (EC 2.4.1.-) (Galactoside 3-L-, fucosyltransferase) (Fucosyltransferase 7) (FucT-VII) (Selectin-ligand, synthase).]                                                                    | Golgi     |
| Q99550 | M-phase phosphoprotein 9.                                                                                                                                                                                              | Golgi     |
| Q9Y2D2 | [UDP-N-acetylglucosamine transporter (Golgi UDP-GlcNAc transporter), (Solute carrier family 35 member A3).]                                                                                                            | Golgi     |
| P42858 | Huntingtin (Huntington disease protein) (HD protein).                                                                                                                                                                  | Golgi     |
| P15144 | [Aminopeptidase N (EC 3.4.11.2) (hAPN) (Alanyl aminopeptidase), (Microsomal aminopeptidase) (Aminopeptidase M) (gp150) (Myeloid plasma, membrane glycoprotein CD13) (CD13 antigen).]                                   | Golgi     |
| P49755 | [Transmembrane emp24 domain-containing protein 10 precursor, (Transmembrane protein Tmp21) (21 kDa transmembrane-trafficking, protein) (p24delta) (S3111125) (S311125) (Tmp-21-I).]                                    | Golgi     |
| P53990 | [Uncharacterized protein KIAA0174 (Putative MAPK-activating protein, PM28).]                                                                                                                                           | Golgi     |
| Q13439 | [Golgin subfamily A member 4 (Trans-Golgi p230) (256 kDa golgin), (Golgin-245) (Protein 72.1).]                                                                                                                        | Golgi     |
| Q14746 | [Conserved oligomeric Golgi complex component 2 (Low density, lipoprotein receptor defect C-complementing protein).]                                                                                                   | Golgi     |
| Q15363 | [Transmembrane emp24 domain-containing protein 2 precursor (Membrane, protein p24A).]                                                                                                                                  | Golgi     |
| Q16549 | [Proprotein convertase subtilisin/kexin type 7 precursor (EC 3.4.21.-), (Proprotein convertase PC7) (Subtilisin/kexin-like protease PC7), (Prohormone convertase PC7) (PC8) (hPC8) (Lymphoma proprotein, convertase).] | Golgi     |
| Q92834 | X-linked retinitis pigmentosa GTPase regulator.                                                                                                                                                                        | Golgi     |
| Q92896 | [Golgi apparatus protein 1 precursor (Golgi sialoglycoprotein MG-160), (E-selectin ligand 1) (ESL-1) (Cysteine-rich fibroblast growth factor, receptor) (CFR-1).]                                                      | Golgi     |
| Q95235 | [Kinesin-like protein KIF20A (Rabkinesin-6) (Rab6-interacting kinesin-, like protein) (GG10_2).]                                                                                                                       | Golgi     |
| P24390 | [ER lumen protein retaining receptor 1 (KDEL receptor 1) (KDEL, endoplasmic reticulum protein retention receptor 1) (Putative MAPK-, activating protein PM23).]                                                        | Golgi     |
| Q01968 | [Inositol polyphosphate 5-phosphatase OCRL-1 (EC 3.1.3.36) (Lowe, oculocerebrorenal syndrome protein).]                                                                                                                | Golgi     |
| P15848 | [Arylsulfatase B precursor (EC 3.1.6.12) (ASB) (N-acetylgalactosamine-, 4-sulfatase) (G4S).]                                                                                                                           | Lysosomal |
| P05164 | [Myeloperoxidase precursor (EC 1.11.1.7) (MPO) [Contains: 89 kDa, myeloperoxidase; 84 kDa myeloperoxidase; Myeloperoxidase light chain;, Myeloperoxidase heavy chain].]                                                | Lysosomal |
| P35125 | [Ubiquitin carboxyl-terminal hydrolase 6 (EC 3.1.2.15) (Ubiquitin, thioesterase 6) (Ubiquitin-specific-processing protease 6), (Deubiquitinating enzyme 6) (Proto-oncogene TRE-2).]                                    | Lysosomal |
| Q13107 | [Ubiquitin carboxyl-terminal hydrolase 4 (EC 3.1.2.15) (Ubiquitin, thioesterase 4) (Ubiquitin-specific-processing protease 4), (Deubiquitinating enzyme 4) (Ubiquitous nuclear protein homolog).]                      | Lysosomal |
| O14773 | [Tripeptidyl-peptidase 1 precursor (EC 3.4.14.9) (Tripeptidyl-peptidase, I) (TPP-1) (TPP-I) (Tripeptidyl aminopeptidase) (Lysosomal pepstatin, insensitive protease) (LPIC) (Cell growth-inhibiting gene 1 protein).]  | Lysosomal |
| P13765 | [HLA class II histocompatibility antigen, DO beta chain precursor (MHC, class II antigen DOB).]                                                                                                                        | Lysosomal |

|        |                                                                                                                                                                                                                         |               |
|--------|-------------------------------------------------------------------------------------------------------------------------------------------------------------------------------------------------------------------------|---------------|
| P17900 | [Ganglioside GM2 activator precursor (GM2-AP) (Cerebroside sulfate, activator protein) (Shingolipid activator protein 3) (SAP-3), [Contains: Ganglioside GM2 activator isoform short].]                                 | Lysosomal     |
| P98164 | [Low-density lipoprotein receptor-related protein 2 precursor (Megalin), (Glycoprotein 330) (gp330).]                                                                                                                   | Lysosomal     |
| O00115 | [Deoxyribonuclease-2-alpha precursor (EC 3.1.22.1) (Deoxyribonuclease, II alpha) (DNase II alpha) (Acid DNase) (Lysosomal DNase II), (R31240_2).]                                                                       | Lysosomal     |
| P45974 | [Ubiquitin carboxyl-terminal hydrolase 5 (EC 3.1.2.15) (Ubiquitin, thioesterase 5) (Ubiquitin-specific-processing protease 5), (Deubiquitinating enzyme 5) (Isopeptidase T).]                                           | Lysosomal     |
| P54803 | [Galactocerebrosidase precursor (EC 3.2.1.46) (GALCERase), (Galactosylceramidase) (Galactosylceramide beta-galactosidase), (Galactocerebroside beta-galactosidase).]                                                    | Lysosomal     |
| Q9UBX1 | Cathepsin F precursor (EC 3.4.22.41) (CATSF).                                                                                                                                                                           | Lysosomal     |
| Q9Y2T2 | [AP-3 complex subunit mu-1 (Adapter-related protein complex 3 mu-1, subunit) (Mu-adaptin 3A) (AP-3 adapter complex mu3A subunit).]                                                                                      | Lysosomal     |
| O14949 | [Ubiquinol-cytochrome c reductase complex ubiquinone-binding protein, QP-C (EC 1.10.2.2) (Ubiquinol-cytochrome c reductase complex 9.5 kDa, protein) (Complex III subunit VII).]                                        | Mitochondrial |
| O43615 | [Import inner membrane translocase subunit TIM44, mitochondrial, precursor.]                                                                                                                                            | Mitochondrial |
| O75489 | [NADH dehydrogenase [ubiquinone] iron-sulfur protein 3, mitochondrial, precursor (EC 1.6.5.3) (EC 1.6.99.3) (NADH-ubiquinone oxidoreductase, 30 kDa subunit) (Complex I-30kD) (CI-30kD).]                               | Mitochondrial |
| O75570 | Peptide chain release factor 1, mitochondrial precursor (MRF-1).                                                                                                                                                        | Mitochondrial |
| O75600 | [2-amino-3-ketobutyrate coenzyme A ligase, mitochondrial precursor, (EC 2.3.1.29) (AKB ligase) (Glycine acetyltransferase) (Aminoacetone, synthetase).]                                                                 | Mitochondrial |
| P12532 | [Creatine kinase, ubiquitous mitochondrial precursor (EC 2.7.3.2) (U-, MtCK) (Mia-CK) (Acidic-type mitochondrial creatine kinase).]                                                                                     | Mitochondrial |
| P14927 | [Ubiquinol-cytochrome c reductase complex 14 kDa protein (EC 1.10.2.2), (Complex III subunit VI) (QP-C).]                                                                                                               | Mitochondrial |
| P19404 | [NADH dehydrogenase [ubiquinone] flavoprotein 2, mitochondrial, precursor (EC 1.6.5.3) (EC 1.6.99.3) (NADH-ubiquinone oxidoreductase, 24 kDa subunit).]                                                                 | Mitochondrial |
| P46199 | [Translation initiation factor IF-2, mitochondrial precursor (IF-2Mt), (IF2(mt)) (IF-2(Mt)).]                                                                                                                           | Mitochondrial |
| P47985 | [Ubiquinol-cytochrome c reductase iron-sulfur subunit, mitochondrial, precursor (EC 1.10.2.2) (Rieske iron-sulfur protein) (RISP).]                                                                                     | Mitochondrial |
| P49753 | [Acyl-coenzyme A thioesterase 2, mitochondrial precursor (EC 3.1.2.2), (Acyl-CoA thioesterase 2) (Acyl-coenzyme A thioester hydrolase 2a), (Long-chain acyl-CoA thioesterase 2) (ZAP128) (CTE-la).]                     | Mitochondrial |
| P49821 | [NADH dehydrogenase [ubiquinone] flavoprotein 1, mitochondrial, precursor (EC 1.6.5.3) (EC 1.6.99.3) (NADH-ubiquinone oxidoreductase, 51 kDa subunit) (Complex I-51kD) (CI-51kD) (NADH dehydrogenase, flavoprotein 1).] | Mitochondrial |
| P56134 | ATP synthase f chain, mitochondrial (EC 3.6.3.14).                                                                                                                                                                      | Mitochondrial |
| Q13423 | [NAD(P) transhydrogenase, mitochondrial precursor (EC 1.6.1.2), (Pyridine nucleotide transhydrogenase) (Nicotinamide nucleotide, transhydrogenase).]                                                                    | Mitochondrial |
| Q16654 | [Pyruvate dehydrogenase [lipoamide]] kinase isozyme 4, mitochondrial, precursor (EC 2.7.11.2) (Pyruvate dehydrogenase kinase isoform 4).]                                                                               | Mitochondrial |
| Q16762 | Thiosulfate sulfurtransferase (EC 2.8.1.1) (Rhodanese).                                                                                                                                                                 | Mitochondrial |
| Q92523 | [Carnitine O-palmitoyltransferase I, muscle isoform (EC 2.3.1.21) (CPT, I) (CPTI-M) (Carnitine palmitoyltransferase 1B) (Carnitine, palmitoyltransferase I-like protein).]                                              | Mitochondrial |
| O95831 | [Apoptosis-inducing factor 1, mitochondrial precursor (EC 1.-.-.-), (Programmed cell death protein 8).]                                                                                                                 | Mitochondrial |
| O95847 | [Mitochondrial uncoupling protein 4 (UCP 4) (Solute carrier family 25, member 27).]                                                                                                                                     | Mitochondrial |

|        |                                                                                                                                                                                                                                                                                                                                                                                                           |               |
|--------|-----------------------------------------------------------------------------------------------------------------------------------------------------------------------------------------------------------------------------------------------------------------------------------------------------------------------------------------------------------------------------------------------------------|---------------|
| O96000 | [NADH dehydrogenase [ubiquinone] 1 beta subcomplex subunit 10, (EC 1.6.5.3) (EC 1.6.99.3) (NADH-ubiquinone oxidoreductase PDSW, subunit) (Complex I-PDSW) (CI-PDSW).]                                                                                                                                                                                                                                     | Mitochondrial |
| P00480 | [Ornithine carbamoyltransferase, mitochondrial precursor (EC 2.1.3.3), (OTCase) (Ornithine transcarbamylase).]                                                                                                                                                                                                                                                                                            | Mitochondrial |
| P04049 | [RAF proto-oncogene serine/threonine-protein kinase (EC 2.7.11.1) (Raf-, 1) (C-RAF) (cRaf).]                                                                                                                                                                                                                                                                                                              | Mitochondrial |
| P22695 | [Ubiquinol-cytochrome-c reductase complex core protein 2, mitochondrial, precursor (EC 1.10.2.2) (Core protein II) (Complex III subunit II).]                                                                                                                                                                                                                                                             | Mitochondrial |
| P27338 | [Amine oxidase [flavin-containing] B (EC 1.4.3.4) (Monoamine oxidase, type B) (MAO-B).]                                                                                                                                                                                                                                                                                                                   | Mitochondrial |
| P36551 | [Coproporphyrinogen III oxidase, mitochondrial precursor (EC 1.3.3.3), (Coproporphyrinogenase) (Coprogen oxidase) (COX).]                                                                                                                                                                                                                                                                                 | Mitochondrial |
| P82914 | 28S ribosomal protein S15, mitochondrial precursor (S15mt) (MRP-S15).                                                                                                                                                                                                                                                                                                                                     | Mitochondrial |
| Q02127 | [Dihydroorotate dehydrogenase, mitochondrial precursor (EC 1.3.3.1), (Dihydroorotate oxidase) (DHODEHase).]                                                                                                                                                                                                                                                                                               | Mitochondrial |
| Q10713 | [Mitochondrial-processing peptidase subunit alpha, mitochondrial, precursor (EC 3.4.24.64) (Alpha-MPP) (P-55).]                                                                                                                                                                                                                                                                                           | Mitochondrial |
| Q99623 | [Prohibitin-2 (B-cell receptor-associated protein BAP37) (Repressor of, estrogen receptor activity) (D-prohibitin).]                                                                                                                                                                                                                                                                                      | Mitochondrial |
| Q99798 | [Aconitate hydratase, mitochondrial precursor (EC 4.2.1.3) (Citrate, hydro-lyase) (Aconitase).]                                                                                                                                                                                                                                                                                                           | Mitochondrial |
| Q9UI17 | [Dimethylglycine dehydrogenase, mitochondrial precursor (EC 1.5.99.2), (ME2GLYDH).]                                                                                                                                                                                                                                                                                                                       | Mitochondrial |
| Q9Y2D0 | [Carbonic anhydrase 5B, mitochondrial precursor (EC 4.2.1.1) (Carbonic, anhydrase VB) (Carbonate dehydratase VB) (CA-VB).]                                                                                                                                                                                                                                                                                | Mitochondrial |
| O00411 | [DNA-directed RNA polymerase, mitochondrial precursor (EC 2.7.7.6), (MTRPOL).]                                                                                                                                                                                                                                                                                                                            | Mitochondrial |
| O00483 | [NADH dehydrogenase [ubiquinone] 1 alpha subcomplex subunit 4, (EC 1.6.5.3) (EC 1.6.99.3) (NADH-ubiquinone oxidoreductase MLRQ, subunit) (Complex I-MLRQ) (CI-MLRQ).]                                                                                                                                                                                                                                     | Mitochondrial |
| O15235 | [28S ribosomal protein S12, mitochondrial precursor (S12mt) (MRP-S12), (MT-RPS12).]                                                                                                                                                                                                                                                                                                                       | Mitochondrial |
| O43674 | [NADH dehydrogenase [ubiquinone] 1 beta subcomplex subunit 5,, mitochondrial precursor (EC 1.6.5.3) (EC 1.6.99.3) (NADH-ubiquinone, oxidoreductase SGD1 subunit) (Complex I-SGD1) (CI-SGD1).]                                                                                                                                                                                                             | Mitochondrial |
| O43837 | [Isocitrate dehydrogenase [NAD] subunit beta, mitochondrial precursor, (EC 1.1.1.41) (Isocitric dehydrogenase) (NAD(+)-specific ICDH).]                                                                                                                                                                                                                                                                   | Mitochondrial |
| O75306 | [NADH dehydrogenase [ubiquinone] iron-sulfur protein 2, mitochondrial, precursor (EC 1.6.5.3) (EC 1.6.99.3) (NADH-ubiquinone oxidoreductase, 49 kDa subunit) (Complex I-49kD) (CI-49kD).]                                                                                                                                                                                                                 | Mitochondrial |
| O75390 | Citrate synthase, mitochondrial precursor (EC 2.3.3.1).                                                                                                                                                                                                                                                                                                                                                   | Mitochondrial |
| P09622 | [Dihydrolipoyl dehydrogenase, mitochondrial precursor (EC 1.8.1.4), (Dihydrolipoamide dehydrogenase) (Glycine cleavage system L protein).]                                                                                                                                                                                                                                                                | Mitochondrial |
| P10515 | [Dihydrolipoyllysine-residue acetyltransferase component of pyruvate, dehydrogenase complex, mitochondrial precursor (EC 2.3.1.12) (Pyruvate, dehydrogenase complex E2 subunit) (PDCE2) (E2) (Dihydrolipoamide S-, acetyltransferase component of pyruvate dehydrogenase complex) (PDC-, E2) (70 kDa mitochondrial autoantigen of primary biliary cirrhosis), (PBC) (M2 antigen complex 70 kDa subunit).] | Mitochondrial |
| P11182 | [Lipoamide acyltransferase component of branched-chain alpha-keto acid, dehydrogenase complex, mitochondrial precursor (EC 2.3.1.168), (Dihydrolipoyllysine-residue (2-methylpropanoyl)transferase) (E2), (Dihydrolipoamide branched chain transacylase) (BCKAD E2 subunit).]                                                                                                                             | Mitochondrial |
| P11586 | [C-1-tetrahydrofolate synthase, cytoplasmic (C1-THF synthase), [Includes: Methylenetetrahydrofolate dehydrogenase (EC 1.5.1.5), Methylenetetrahydrofolate cyclohydrolase (EC 3.5.4.9), Formyltetrahydrofolate synthetase (EC 6.3.4.3)].]                                                                                                                                                                  | Mitochondrial |
| P12694 | [2-oxoisovalerate dehydrogenase subunit alpha, mitochondrial precursor, (EC 1.2.4.4) (Branched-chain alpha-keto acid dehydrogenase E1, component alpha chain) (BCKDH E1-alpha) (BCKDE1A).]                                                                                                                                                                                                                | Mitochondrial |

|        |                                                                                                                                                                                                                            |               |
|--------|----------------------------------------------------------------------------------------------------------------------------------------------------------------------------------------------------------------------------|---------------|
| P16260 | [Grave disease carrier protein (GDC) (Grave disease autoantigen) (GDA), (Mitochondrial solute carrier protein homolog) (Solute carrier family, 25 member 16).]                                                             | Mitochondrial |
| P17568 | [NADH dehydrogenase [ubiquinone] 1 beta subcomplex subunit 7, (EC 1.6.5.3) (EC 1.6.99.3) (NADH-ubiquinone oxidoreductase B18, subunit) (Complex I-B18) (CI-B18) (Cell adhesion protein SQM1).]                             | Mitochondrial |
| P45880 | [Voltage-dependent anion-selective channel protein 2 (VDAC-2) (hVDAC2), (Outer mitochondrial membrane protein porin 2).]                                                                                                   | Mitochondrial |
| P50416 | [Carnitine O-palmitoyltransferase I, liver isoform (EC 2.3.1.21) (CPT, I) (CPTI-L) (Carnitine palmitoyltransferase 1A).]                                                                                                   | Mitochondrial |
| P54098 | [DNA polymerase subunit gamma-1 (EC 2.7.7.7) (Mitochondrial DNA, polymerase catalytic subunit) (PolG-alpha).]                                                                                                              | Mitochondrial |
| Q14409 | [Glycerol kinase, testis specific 1 (EC 2.7.1.30) (ATP:glycerol 3-, phosphotransferase) (Glycerokinase) (GK).]                                                                                                             | Mitochondrial |
| Q15070 | [Inner membrane protein OXA1L, mitochondrial precursor (Oxidase, assembly 1-like protein) (OXA1-like protein) (OXA1Hs) (Hsa).]                                                                                             | Mitochondrial |
| Q15120 | [Pyruvate dehydrogenase [lipoamide]] kinase isozyme 3, mitochondrial, precursor (EC 2.7.11.2) (Pyruvate dehydrogenase kinase isoform 3).]                                                                                  | Mitochondrial |
| Q16718 | [NADH dehydrogenase [ubiquinone] 1 alpha subcomplex subunit 5, (EC 1.6.5.3) (EC 1.6.99.3) (NADH-ubiquinone oxidoreductase 13 kDa-B, subunit) (Complex I-13kD-B) (CI-13kD-B) (Complex I subunit B13).]                      | Mitochondrial |
| Q16798 | [NADP-dependent malic enzyme, mitochondrial precursor (EC 1.1.1.40), (NADP-ME) (Malic enzyme 3).]                                                                                                                          | Mitochondrial |
| Q92731 | Estrogen receptor beta (ER-beta).                                                                                                                                                                                          | Mitochondrial |
| P03905 | [NADH-ubiquinone oxidoreductase chain 4 (EC 1.6.5.3) (NADH, dehydrogenase subunit 4).]                                                                                                                                     | Mitochondrial |
| P06576 | ATP synthase subunit beta, mitochondrial precursor (EC 3.6.3.14).                                                                                                                                                          | Mitochondrial |
| P23786 | [Carnitine O-palmitoyltransferase 2, mitochondrial precursor, (EC 2.3.1.21) (Carnitine palmitoyltransferase II) (CPT II).]                                                                                                 | Mitochondrial |
| P30049 | ATP synthase delta chain, mitochondrial precursor (EC 3.6.3.14).                                                                                                                                                           | Mitochondrial |
| P36969 | [Phospholipid hydroperoxide glutathione peroxidase, mitochondrial, precursor (EC 1.11.1.12) (PHGPx) (GPX-4).]                                                                                                              | Mitochondrial |
| P40926 | Malate dehydrogenase, mitochondrial precursor (EC 1.1.1.37).                                                                                                                                                               | Mitochondrial |
| Q02338 | [D-beta-hydroxybutyrate dehydrogenase, mitochondrial precursor, (EC 1.1.1.30) (BDH) (3-hydroxybutyrate dehydrogenase).]                                                                                                    | Mitochondrial |
| Q07817 | Apoptosis regulator Bcl-X (Bcl-2-like 1 protein).                                                                                                                                                                          | Mitochondrial |
| Q9UPV9 | [Trafficking kinesin-binding protein 1 (106 kDa O-GlcNAc transferase-, interacting protein).]                                                                                                                              | Mitochondrial |
| Q9Y305 | [Acyl-coenzyme A thioesterase 9 (EC 3.1.2.-) (Acyl-CoA thioesterase 9), (Acyl-CoA thioester hydrolase 9).]                                                                                                                 | Mitochondrial |
| O43181 | [NADH dehydrogenase [ubiquinone] iron-sulfur protein 4, mitochondrial, precursor (EC 1.6.5.3) (EC 1.6.99.3) (NADH-ubiquinone oxidoreductase, 18 kDa subunit) (Complex I-18 kDa) (CI-18 kDa) (Complex I-AQDQ) (CI-, AQDQ).] | Mitochondrial |
| O43715 | [TP53-regulated inhibitor of apoptosis 1 (p53-inducible cell-survival, factor) (p53CSV) (Protein 15E1.1) (WF-1).]                                                                                                          | Mitochondrial |
| O75251 | [NADH dehydrogenase [ubiquinone] iron-sulfur protein 7, mitochondrial, precursor (EC 1.6.5.3) (EC 1.6.99.3) (NADH-ubiquinone oxidoreductase, 20 kDa subunit) (Complex I-20kD) (CI-20kD) (PSST subunit).]                   | Mitochondrial |
| O75648 | [tRNA (5-methylaminomethyl-2-thiouridylate)-methyltransferase, (EC 2.1.1.61) (Mitochondrial tRNA-specific 2-thiouridylase 1) (MTO2, homolog).]                                                                             | Mitochondrial |
| P42765 | [3-ketoacyl-CoA thiolase, mitochondrial (EC 2.3.1.16) (Beta-, ketothiolase) (Acetyl-CoA acyltransferase) (Mitochondrial 3-oxoacyl-, CoA thiolase) (T1).]                                                                   | Mitochondrial |
| P43897 | Elongation factor Ts, mitochondrial precursor (EF-Ts) (EF-TsMt).                                                                                                                                                           | Mitochondrial |
| P49411 | Elongation factor Tu, mitochondrial precursor (EF-Tu) (P43).                                                                                                                                                               | Mitochondrial |
| P50440 | [Glycine amidinotransferase, mitochondrial precursor (EC 2.1.4.1) (L-, arginine:glycine amidinotransferase) (Transamidinase) (AT).]                                                                                        | Mitochondrial |
| P52789 | [Hexokinase-2 (EC 2.7.1.1) (Hexokinase type II) (HK II) (Muscle form, hexokinase).]                                                                                                                                        | Mitochondrial |

|         |                                                                                                                                                                                                                                                                                                              |               |
|---------|--------------------------------------------------------------------------------------------------------------------------------------------------------------------------------------------------------------------------------------------------------------------------------------------------------------|---------------|
| P53007  | [Tricarboxylate transport protein, mitochondrial precursor (Citrate, transport protein) (CTP) (Tricarboxylate carrier protein) (Solute, carrier family 25 member 1).]                                                                                                                                        | Mitochondrial |
| P54868  | [Hydroxymethylglutaryl-CoA synthase, mitochondrial precursor, (EC 2.3.3.10) (HMG-CoA synthase) (3-hydroxy-3-methylglutaryl coenzyme, A synthase).]                                                                                                                                                           | Mitochondrial |
| P55084  | [Trifunctional enzyme subunit beta, mitochondrial precursor (TP-beta), [Includes: 3-ketoacyl-CoA thiolase (EC 2.3.1.16) (Acetyl-CoA, acyltransferase) (Beta-ketothiolase)].]                                                                                                                                 | Mitochondrial |
| P55851  | Mitochondrial uncoupling protein 2 (UCP 2) (UCPH).                                                                                                                                                                                                                                                           | Mitochondrial |
| Q14410  | [Glycerol kinase, testis specific 2 (EC 2.7.1.30) (ATP:glycerol 3-, phosphotransferase) (Glycerokinase) (GK).]                                                                                                                                                                                               | Mitochondrial |
| Q15118  | [[Pyruvate dehydrogenase [lipoamide]] kinase isozyme 1, mitochondrial, precursor (EC 2.7.11.2) (Pyruvate dehydrogenase kinase isoform 1).]                                                                                                                                                                   | Mitochondrial |
| Q16822  | [Phosphoenolpyruvate carboxykinase [GTP], mitochondrial precursor, (EC 4.1.1.32) (Phosphoenolpyruvate carboxylase) (PEPCK-M).]                                                                                                                                                                               | Mitochondrial |
| Q92934  | [Bcl2 antagonist of cell death (BAD) (Bcl-2-binding component 6) (Bcl-, XL/Bcl-2-associated death promoter) (Bcl-2-like 8 protein).]                                                                                                                                                                         | Mitochondrial |
| O76031  | [ATP-dependent Clp protease ATP-binding subunit clpX-like,, mitochondrial precursor.]                                                                                                                                                                                                                        | Mitochondrial |
| O95299  | [NADH dehydrogenase [ubiquinone] 1 alpha subcomplex subunit 10,, mitochondrial precursor (EC 1.6.5.3) (EC 1.6.99.3) (NADH-ubiquinone, oxidoreductase 42 kDa subunit) (Complex I-42kD) (CI-42kD).]                                                                                                            | Mitochondrial |
| P04150  | Glucocorticoid receptor (GR).                                                                                                                                                                                                                                                                                | Mitochondrial |
| P04181  | [Ornithine aminotransferase, mitochondrial precursor (EC 2.6.1.13), (Ornithine--oxo-acid aminotransferase) [Contains: Ornithine, aminotransferase, hepatic form; Ornithine aminotransferase, renal, form].]                                                                                                  | Mitochondrial |
| P22033  | [Methylmalonyl-CoA mutase, mitochondrial precursor (EC 5.4.99.2) (MCM), (Methylmalonyl-CoA isomerase).]                                                                                                                                                                                                      | Mitochondrial |
| P26440  | [Isovaleryl-CoA dehydrogenase, mitochondrial precursor (EC 1.3.99.10), (IVD).]                                                                                                                                                                                                                               | Mitochondrial |
| P31040  | [Succinate dehydrogenase [ubiquinone] flavoprotein subunit,, mitochondrial precursor (EC 1.3.5.1) (Fp) (Flavoprotein subunit of, complex II).]                                                                                                                                                               | Mitochondrial |
| P31327  | [Carbamoyl-phosphate synthase [ammonia], mitochondrial precursor, (EC 6.3.4.16) (Carbamoyl-phosphate synthetase I) (CPSase I).]                                                                                                                                                                              | Mitochondrial |
| P31415  | [Calsequestrin-1 precursor (Calsequestrin, skeletal muscle isoform), (Calmitin).]                                                                                                                                                                                                                            | Mitochondrial |
| P36776  | [Lon protease homolog, mitochondrial precursor (EC 3.4.21.-) (Lon, protease-like protein) (LONP) (Mitochondrial ATP-dependent protease, Lon) (LONHs) (Serine protease 15).]                                                                                                                                  | Mitochondrial |
| P62072  | Mitochondrial import inner membrane translocase subunit Tim10.                                                                                                                                                                                                                                               | Mitochondrial |
| P78540  | [Arginase-2, mitochondrial precursor (EC 3.5.3.1) (Arginase II) (Non-, hepatic arginase) (Kidney-type arginase).]                                                                                                                                                                                            | Mitochondrial |
| P82650  | Mitochondrial 28S ribosomal protein S22 (S22mt) (MRP-S22).                                                                                                                                                                                                                                                   | Mitochondrial |
| Q02252  | [Methylmalonate-semialdehyde dehydrogenase [acylating], mitochondrial, precursor (EC 1.2.1.27) (MMSDH) (Malonate-semialdehyde dehydrogenase, [acylating]) (EC 1.2.1.18).]                                                                                                                                    | Mitochondrial |
| Q99551  | [Transcription termination factor, mitochondrial precursor (mTERF), (Mitochondrial transcription termination factor 1).]                                                                                                                                                                                     | Mitochondrial |
| Q99714  | [3-hydroxyacyl-CoA dehydrogenase type-2 (EC 1.1.1.35) (3-hydroxyacyl-, CoA dehydrogenase type II) (Type II HADH) (3-hydroxy-2-methylbutyryl, CoA dehydrogenase) (EC 1.1.1.178) (Endoplasmic reticulum-associated, amyloid beta-peptide-binding protein) (Short-chain type, dehydrogenase/reductase XH98G2).] | Mitochondrial |
| Q99797  | [Mitochondrial intermediate peptidase, mitochondrial precursor, (EC 3.4.24.59) (MIP).]                                                                                                                                                                                                                       | Mitochondrial |
| Q99807  | [Ubiquinone biosynthesis protein COQ7 homolog (Coenzyme Q biosynthesis, protein 7 homolog) (Timing protein clk-1 homolog).]                                                                                                                                                                                  | Mitochondrial |
| Q99NYK5 | Mitochondrial 39S ribosomal protein L39 (L39mt) (MRP-L39) (MRP-L5).                                                                                                                                                                                                                                          | Mitochondrial |



|        |                                                                                                                                                                                                                                                                                                                    |               |
|--------|--------------------------------------------------------------------------------------------------------------------------------------------------------------------------------------------------------------------------------------------------------------------------------------------------------------------|---------------|
| Q9UHK6 | [Alpha-methylacyl-CoA racemase (EC 5.1.99.4) (2-methylacyl-CoA, racemase).]                                                                                                                                                                                                                                        | Mitochondrial |
| Q9UIJ7 | [GTP:AMP phosphotransferase mitochondrial (EC 2.7.4.10) (Adenylate, kinase 3) (AK3) (Adenylate kinase 3 alpha-like 1).]                                                                                                                                                                                            | Mitochondrial |
| Q9Y375 | [Complex I intermediate-associated protein 30, mitochondrial precursor, (NADH dehydrogenase [ubiquinone] 1 alpha subcomplex assembly factor, 1).]                                                                                                                                                                  | Mitochondrial |
| O14645 | [Axonemal dynein light intermediate polypeptide 1 (Inner dynein arm, light chain, axonemal) (hp28).]                                                                                                                                                                                                               | Neural        |
| O15554 | [Intermediate conductance calcium-activated potassium channel protein 4, (SK4) (KCa4) (IK1) (IKCa1) (Putative Gardos channel).]                                                                                                                                                                                    | Neural        |
| O43526 | [Potassium voltage-gated channel subfamily KQT member 2 (Voltage-gated, potassium channel subunit Kv7.2) (Neuroblastoma-specific potassium, channel subunit alpha KvLQT2) (KQT-like 2).]                                                                                                                           | Neural        |
| O60359 | [Voltage-dependent calcium channel gamma-3 subunit (Neuronal voltage-, gated calcium channel gamma-3 subunit).]                                                                                                                                                                                                    | Neural        |
| P12036 | [Neurofilament heavy polypeptide (NF-H) (Neurofilament triplet H, protein) (200 kDa neurofilament protein).]                                                                                                                                                                                                       | Neural        |
| P21359 | [Neurofibromin (Neurofibromatosis-related protein NF-1) [Contains:, Neurofibromin truncated].]                                                                                                                                                                                                                     | Neural        |
| P48547 | [Potassium voltage-gated channel subfamily C member 1 (Voltage-gated, potassium channel subunit Kv3.1) (Kv4) (NGK2).]                                                                                                                                                                                              | Neural        |
| P07196 | [Neurofilament light polypeptide (NF-L) (Neurofilament triplet L, protein) (68 kDa neurofilament protein).]                                                                                                                                                                                                        | Neural        |
| P22459 | [Potassium voltage-gated channel subfamily A member 4 (Voltage-gated, potassium channel subunit Kv1.4) (HK1) (HPCN2) (HBK4) (HUKII).]                                                                                                                                                                              | Neural        |
| Q12809 | [Potassium voltage-gated channel subfamily H member 2 (Voltage-gated, potassium channel subunit Kv11.1) (Ether-a-go-go-related gene, potassium channel 1) (H-ERG) (Erg1) (Ether-a-go-go-related protein 1), (Eag-related protein 1) (eag homolog).]                                                                | Neural        |
| Q9NY46 | [Sodium channel protein type 3 subunit alpha (Sodium channel protein, type III subunit alpha) (Voltage-gated sodium channel subunit alpha, Nav1.3) (Sodium channel protein, brain III subunit alpha) (Voltage-, gated sodium channel subtype III).]                                                                | Neural        |
| O43497 | [Voltage-dependent T-type calcium channel subunit alpha-1G (Voltage-, gated calcium channel subunit alpha Cav3.1) (Cav3.1c) (NBR13).]                                                                                                                                                                              | Neural        |
| P54289 | [Voltage-dependent calcium channel subunit alpha-2/delta-1 precursor, (Voltage-gated calcium channel subunit alpha-2/delta-1) [Contains:, Voltage-dependent calcium channel subunit alpha-2-1; Voltage-dependent, calcium channel subunit delta-1].]                                                               | Neural        |
| O95180 | [Voltage-dependent T-type calcium channel subunit alpha-1H (Voltage-, gated calcium channel subunit alpha Cav3.2) (Low-voltage-activated, calcium channel alpha1 3.2 subunit).]                                                                                                                                    | Neural        |
| P07197 | [Neurofilament medium polypeptide (NF-M) (Neurofilament triplet M, protein) (160 kDa neurofilament protein) (Neurofilament 3).]                                                                                                                                                                                    | Neural        |
| Q00535 | [Cell division protein kinase 5 (EC 2.7.11.22) (Cyclin-dependent kinase, 5) (Tau protein kinase II catalytic subunit) (TPKII catalytic subunit), (Serine/threonine-protein kinase PSSALRE).]                                                                                                                       | Neural        |
| Q02641 | [Voltage-dependent L-type calcium channel subunit beta-1 (CAB1), (Calcium channel voltage-dependent subunit beta 1).]                                                                                                                                                                                              | Neural        |
| O43525 | [Potassium voltage-gated channel subfamily KQT member 3 (Voltage-gated, potassium channel subunit Kv7.3) (Potassium channel subunit alpha, KvLQT3) (KQT-like 3).]                                                                                                                                                  | Neural        |
| P10636 | [Microtubule-associated protein tau (Neurofibrillary tangle protein), (Paired helical filament-tau) (PHF-tau).]                                                                                                                                                                                                    | Neural        |
| P51787 | [Potassium voltage-gated channel subfamily KQT member 1 (Voltage-gated, potassium channel subunit Kv7.1) (IKs producing slow voltage-gated, potassium channel subunit alpha KvLQT1) (KQT-like 1).]                                                                                                                 | Neural        |
| Q15078 | [Cyclin-dependent kinase 5 activator 1 precursor (CDK5 activator 1), (Cyclin-dependent kinase 5 regulatory subunit 1) (Tau protein kinase, II 23 kDa subunit) (TPKII regulatory subunit) (p23) (p25) (p35), [Contains: Cyclin-dependent kinase 5 activator 1, p35; Cyclin-, dependent kinase 5 activator 1, p25].] | Neural        |
| Q16352 | [Alpha-internexin (Alpha-Inx) (66 kDa neurofilament protein), (Neurofilament-66) (NF-66).]                                                                                                                                                                                                                         | Neural        |
| Q92952 | Small conductance calcium-activated potassium channel protein 1 (SK1).                                                                                                                                                                                                                                             | Neural        |
| Q9H2C0 | Gigaxonin (Kelch-like protein 16).                                                                                                                                                                                                                                                                                 | Neural        |

|        |                                                                                                                                                                                                                      |         |
|--------|----------------------------------------------------------------------------------------------------------------------------------------------------------------------------------------------------------------------|---------|
| Q9NR82 | [Potassium voltage-gated channel subfamily KQT member 5 (Voltage-gated, potassium channel subunit Kv7.5) (Potassium channel subunit alpha, KvLQT5) (KQT-like 5).]                                                    | Neural  |
| Q9NYC9 | Ciliary dynein heavy chain 9 (Axonemal beta dynein heavy chain 9).                                                                                                                                                   | Neural  |
| O00257 | [E3 SUMO-protein ligase CBX4 (Chromobox protein homolog 4) (Polycomb 2, homolog) (Pc2) (hPc2).]                                                                                                                      | Nuclear |
| O00482 | [Orphan nuclear receptor NR5A2 (Alpha-1-fetoprotein transcription, factor) (Hepatocytic transcription factor) (B1-binding factor) (hB1F), (CYP7A promoter-binding factor) (Liver receptor homolog 1) (LRH-1).]       | Nuclear |
| O14682 | [Ectoderm-neural cortex protein 1 (ENC-1) (p53-induced gene 10 protein), (Nuclear matrix protein NRP/B).]                                                                                                            | Nuclear |
| O14753 | Putative transcription factor Ovo-like 1 (hOvo1).                                                                                                                                                                    | Nuclear |
| O14802 | [DNA-directed RNA polymerase III subunit RPC1 (EC 2.7.7.6) (RNA, polymerase III subunit C1) (DNA-directed RNA polymerase III subunit A), (DNA-directed RNA polymerase III largest subunit) (RPC155) (C160).]         | Nuclear |
| O15119 | T-box transcription factor TBX3 (T-box protein 3).                                                                                                                                                                   | Nuclear |
| O15265 | Ataxin-7 (Spinocerebellar ataxia type 7 protein).                                                                                                                                                                    | Nuclear |
| O43670 | Zinc finger protein 207.                                                                                                                                                                                             | Nuclear |
| O43791 | Speckle-type POZ protein (HIB homolog 1) (Roadkill homolog 1).                                                                                                                                                       | Nuclear |
| O43830 | Zinc finger protein 73 (Zinc finger protein 186) (hZNF2).                                                                                                                                                            | Nuclear |
| O43929 | Origin recognition complex subunit 4.                                                                                                                                                                                | Nuclear |
| O60231 | [Putative pre-mRNA-splicing factor ATP-dependent RNA helicase DHX16, (EC 3.6.1.-) (DEAH-box protein 16) (ATP-dependent RNA helicase #3).]                                                                            | Nuclear |
| O60248 | SOX-15 protein (SOX-20 protein) (SOX-12 protein).                                                                                                                                                                    | Nuclear |
| O60287 | Nucleolar preribosomal-associated protein 1 (Fragment).                                                                                                                                                              | Nuclear |
| O60663 | [LIM homeobox transcription factor 1 beta (LIM/homeobox protein LMX1B), (LIM/homeobox protein 1.2) (LMX-1.2).]                                                                                                       | Nuclear |
| O75386 | Tubby-related protein 3 (Tubby-like protein 3).                                                                                                                                                                      | Nuclear |
| P09884 | DNA polymerase alpha catalytic subunit (EC 2.7.7.7).                                                                                                                                                                 | Nuclear |
| P10243 | Myb-related protein A (A-Myb).                                                                                                                                                                                       | Nuclear |
| P10828 | Thyroid hormone receptor beta-1.                                                                                                                                                                                     | Nuclear |
| P11308 | Transcriptional regulator ERG (Transforming protein ERG).                                                                                                                                                            | Nuclear |
| P11388 | [DNA topoisomerase 2-alpha (EC 5.99.1.3) (DNA topoisomerase II, alpha, isozyme).]                                                                                                                                    | Nuclear |
| P11802 | [Cell division protein kinase 4 (EC 2.7.11.22) (Cyclin-dependent kinase, 4) (PSK-J3).]                                                                                                                               | Nuclear |
| P13051 | Uracil-DNA glycosylase (EC 3.2.2.-) (UDG).                                                                                                                                                                           | Nuclear |
| P14653 | Homeobox protein Hox-B1 (Hox-2I).                                                                                                                                                                                    | Nuclear |
| P15923 | [Transcription factor E2-alpha (Immunoglobulin enhancer-binding factor, E12/E47) (Transcription factor 3) (TCF-3) (Immunoglobulin, transcription factor 1) (Transcription factor ITF-1) (Kappa-E2-binding, factor).] | Nuclear |
| P16455 | [Methylated-DNA--protein-cysteine methyltransferase (EC 2.1.1.63) (6-O-, methylguanine-DNA methyltransferase) (MGMT) (O-6-methylguanine-DNA-, alkyltransferase).]                                                    | Nuclear |
| P17098 | Zinc finger protein 8 (Zinc finger protein HF.18).                                                                                                                                                                   | Nuclear |
| P17482 | Homeobox protein Hox-B9 (Hox-2E) (Hox-2.5).                                                                                                                                                                          | Nuclear |
| P17844 | [Probable ATP-dependent RNA helicase DDX5 (EC 3.6.1.-) (DEAD box, protein 5) (RNA helicase p68).]                                                                                                                    | Nuclear |
| P41970 | [ETS domain-containing protein Elk-3 (ETS-related protein NET) (ETS-, related protein ERP) (SRF accessory protein 2) (SAP-2).]                                                                                       | Nuclear |

|        |                                                                                                                                                                                                                                                         |         |
|--------|---------------------------------------------------------------------------------------------------------------------------------------------------------------------------------------------------------------------------------------------------------|---------|
| P42167 | [Lamina-associated polypeptide 2, isoforms beta/gamma (Thymopoietin,, isoforms beta/gamma) (TP beta/gamma) (Thymopoietin-related peptide, isoforms beta/gamma) (TPRP isoforms beta/gamma) [Contains:, Thymopoietin (TP) (Splenin); Thymopentin (TP5)].] | Nuclear |
| P42568 | [Protein AF-9 (ALL1 fused gene from chromosome 9 protein), (Myeloid/lymphoid or mixed-lineage leukemia translocated to chromosome, 3 protein) (YEATS domain-containing protein 3).]                                                                     | Nuclear |
| P42695 | [Condensin-II complex subunit D3 (Non-SMC condensin II complex subunit, D3) (hCAP-D3).]                                                                                                                                                                 | Nuclear |
| P43243 | Matrin-3.                                                                                                                                                                                                                                               | Nuclear |
| P43268 | [ETS translocation variant 4 (Adenovirus E1A enhancer-binding protein), (E1A-F).]                                                                                                                                                                       | Nuclear |
| P43351 | DNA repair protein RAD52 homolog.                                                                                                                                                                                                                       | Nuclear |
| P46063 | ATP-dependent DNA helicase Q1 (EC 3.6.1.-) (DNA-dependent ATPase Q1).                                                                                                                                                                                   | Nuclear |
| P46736 | BRCA1/BRCA2-containing complex subunit 3.                                                                                                                                                                                                               | Nuclear |
| P48382 | DNA-binding protein RFX5 (Regulatory factor X subunit 5).                                                                                                                                                                                               | Nuclear |
| P49137 | [MAP kinase-activated protein kinase 2 (EC 2.7.11.1) (MAPK-activated, protein kinase 2) (MAPKAP kinase 2) (MAPKAPK-2) (MK2).]                                                                                                                           | Nuclear |
| P49715 | CCAAT/enhancer-binding protein alpha (C/EBP alpha).                                                                                                                                                                                                     | Nuclear |
| P49959 | [Double-strand break repair protein MRE11A (MRE11 homolog 1) (MRE11, meiotic recombination 11 homolog A).]                                                                                                                                              | Nuclear |
| P50219 | Motor neuron and pancreas homeobox protein 1 (Homeobox protein HB9).                                                                                                                                                                                    | Nuclear |
| P50402 | Emerin.                                                                                                                                                                                                                                                 | Nuclear |
| P51531 | [Probable global transcription activator SNF2L2 (EC 3.6.1.-) (ATP-, dependent helicase SMARCA2) (SNF2-alpha) (SWI/SNF-related matrix-, associated actin-dependent regulator of chromatin subfamily A member, 2) (hBRM).]                                | Nuclear |
| P51815 | Zinc finger protein 75 (Zinc finger protein 82).                                                                                                                                                                                                        | Nuclear |
| P52741 | Zinc finger protein 134.                                                                                                                                                                                                                                | Nuclear |
| P52744 | Zinc finger protein 138.                                                                                                                                                                                                                                | Nuclear |
| P53041 | [Serine/threonine-protein phosphatase 5 (EC 3.1.3.16) (PP5) (Protein, phosphatase T) (PP-T) (PPT).]                                                                                                                                                     | Nuclear |
| P53567 | CCAAT/enhancer-binding protein gamma (C/EBP gamma).                                                                                                                                                                                                     | Nuclear |
| P54278 | PMS1 protein homolog 2 (DNA mismatch repair protein PMS2).                                                                                                                                                                                              | Nuclear |
| P54845 | Neural retina-specific leucine zipper protein (NRL) (D14S46E).                                                                                                                                                                                          | Nuclear |
| P56182 | [RRP1-like protein (Protein NNP-1) (Novel nuclear protein 1) (Nucleolar, protein Nop52).]                                                                                                                                                               | Nuclear |
| P56537 | [Eukaryotic translation initiation factor 6 (eIF-6) (B4 integrin, interactor) (CAB) (p27(BBP)) (B(2)GCN homolog).]                                                                                                                                      | Nuclear |
| P56559 | [ADP-ribosylation factor-like protein 4C (ADP-ribosylation factor-like, protein 7) (ADP-ribosylation factor-like protein LAK).]                                                                                                                         | Nuclear |
| P57071 | [PR domain zinc finger protein 15 (PR domain-containing protein 15), (Zinc finger protein 298).]                                                                                                                                                        | Nuclear |
| Q13398 | Zinc finger protein 211 (Zinc finger protein C2H2-25).                                                                                                                                                                                                  | Nuclear |
| Q13415 | Origin recognition complex subunit 1 (Replication control protein 1).                                                                                                                                                                                   | Nuclear |
| Q13569 | G/T mismatch-specific thymine DNA glycosylase (EC 3.2.2.-).                                                                                                                                                                                             | Nuclear |
| Q13772 | [Nuclear receptor coactivator 4 (NCoA-4) (70 kDa androgen receptor, coactivator) (70 kDa AR-activator) (Ret-activating protein ELE1).]                                                                                                                  | Nuclear |
| Q14106 | Protein Tob2 (Transducer of erbB-2 2).                                                                                                                                                                                                                  | Nuclear |
| Q14161 | [ARF GTPase-activating protein GIT2 (G protein-coupled receptor kinase-, interactor 2) (GRK-interacting protein 2) (Cool-interacting tyrosine-, phosphorylated protein 2) (CAT2) (CAT-2).]                                                              | Nuclear |
| Q14191 | Werner syndrome ATP-dependent helicase (EC 3.6.1.-).                                                                                                                                                                                                    | Nuclear |

|        |                                                                                                                                                                                                                                                 |         |
|--------|-------------------------------------------------------------------------------------------------------------------------------------------------------------------------------------------------------------------------------------------------|---------|
| Q14995 | [Orphan nuclear receptor NR1D2 (Rev-erb-beta) (EAR-1R) (Orphan nuclear, hormone receptor BD73).]                                                                                                                                                | Nuclear |
| Q15059 | Bromodomain-containing protein 3 (RING3-like protein).                                                                                                                                                                                          | Nuclear |
| Q15306 | [Interferon regulatory factor 4 (IRF-4) (Lymphocyte-specific interferon, regulatory factor) (LSIRF) (NF-EM5) (Multiple myeloma oncogene 1).]                                                                                                    | Nuclear |
| Q15398 | [Disks large-associated protein DLG7 (Discs large homolog 7) (Hepatoma, up-regulated protein) (HURP).]                                                                                                                                          | Nuclear |
| Q15695 | [U2 small nuclear ribonucleoprotein auxiliary factor 35 kDa subunit-, related protein 1 (U2(RNU2) small nuclear RNA auxiliary factor 1-like, 1) (CCCH type zinc finger, RNA-binding motif and serine/arginine rich, protein 1).]                | Nuclear |
| Q15906 | [Vacuolar protein sorting-associated protein 72 homolog (Transcription, factor-like 1) (Protein YL-1).]                                                                                                                                         | Nuclear |
| Q16534 | Hepatic leukemia factor.                                                                                                                                                                                                                        | Nuclear |
| Q16665 | [Hypoxia-inducible factor 1 alpha (HIF-1 alpha) (HIF1 alpha) (ARNT-, interacting protein) (Member of PAS protein 1) (Basic-helix-loop-, helix-PAS protein MOP1).]                                                                               | Nuclear |
| O75971 | [snRNA-activating protein complex subunit 5 (SNAPc subunit 5) (Small, nuclear RNA-activating complex polypeptide 5) (snRNA-activating, protein complex 19 kDa subunit) (SNAPc 19 kDa subunit).]                                                 | Nuclear |
| O94916 | [Nuclear factor of activated T-cells 5 (T-cell transcription factor, NFAT5) (NF-AT5) (Tonicity-responsive enhancer-binding protein) (TonE-, binding protein) (TonEBP).]                                                                         | Nuclear |
| O95218 | [Zinc finger Ran-binding domain-containing protein 2 (Zinc finger, protein 265) (Zinc finger, splicing).]                                                                                                                                       | Nuclear |
| P23769 | Endothelial transcription factor GATA-2 (GATA-binding protein 2).                                                                                                                                                                               | Nuclear |
| P24468 | [COUP transcription factor 2 (COUP-TF2) (COUP-TF II) (Apolipoprotein AI, regulatory protein 1) (ARP-1).]                                                                                                                                        | Nuclear |
| P24928 | [DNA-directed RNA polymerase II subunit RPB1 (EC 2.7.7.6) (RNA, polymerase II subunit B1) (DNA-directed RNA polymerase II subunit A), (DNA-directed RNA polymerase III largest subunit).]                                                       | Nuclear |
| P27694 | [Replication protein A 70 kDa DNA-binding subunit (RP-A) (RF-A), (Replication factor-A protein 1) (Single-stranded DNA-binding protein), (p70).]                                                                                                | Nuclear |
| P28370 | [Probable global transcription activator SNF2L1 (EC 3.6.1.-), (Nucleosome-remodeling factor subunit SNF2L) (ATP-dependent helicase, SMARCA1) (SWI/SNF-related matrix-associated actin-dependent regulator, of chromatin subfamily A member 1).] | Nuclear |
| P31629 | [Human immunodeficiency virus type I enhancer-binding protein 2 (HIV-, EP2) (MHC-binding protein 2) (MBP-2).]                                                                                                                                   | Nuclear |
| P32242 | Homeobox protein OTX1 (Orthodenticle homolog 1).                                                                                                                                                                                                | Nuclear |
| P35226 | [Polycomb complex protein BMI-1 (Polycomb group RING finger protein 4), (RING finger protein 51).]                                                                                                                                              | Nuclear |
| P35251 | [Replication factor C subunit 1 (Replication factor C large subunit), (RF-C 140 kDa subunit) (Activator 1 140 kDa subunit) (Activator 1, large subunit) (A1 140 kDa subunit) (DNA-binding protein PO-GA).]                                      | Nuclear |
| P35659 | Protein DEK.                                                                                                                                                                                                                                    | Nuclear |
| P39748 | [Flap endonuclease 1 (EC 3.1.-.-) (Flap structure-specific endonuclease, 1) (FEN-1) (Maturation factor 1) (MF1) (hFEN-1) (DNase IV).]                                                                                                           | Nuclear |
| P63162 | [Small nuclear ribonucleoprotein-associated protein N (snRNP-N) (Sm, protein N) (Sm-N) (SmN) (Sm-D) (Tissue-specific-splicing protein).]                                                                                                        | Nuclear |
| P83870 | [PHD finger-like domain-containing protein 5A (PHD finger-like domain, protein 5A) (Splicing factor 3B-associated 14 kDa protein) (SF3b14b).]                                                                                                   | Nuclear |
| P98169 | Zinc finger X-linked protein ZXDB.                                                                                                                                                                                                              | Nuclear |
| Q01167 | [Forkhead box protein K2 (Interleukin enhancer-binding factor 1), (Cellular transcription factor ILF-1) (FOXK1).]                                                                                                                               | Nuclear |
| Q01780 | [Exosome component 10 (Polymyositis/scleroderma autoantigen 2), (Autoantigen PM/Scl 2) (Polymyositis/scleroderma autoantigen 100 kDa), (PM/Scl-100) (P100 polymyositis-scleroderma overlap syndrome-, associated autoantigen).]                 | Nuclear |

|        |                                                                                                                                                                                                                                                          |         |
|--------|----------------------------------------------------------------------------------------------------------------------------------------------------------------------------------------------------------------------------------------------------------|---------|
| Q01954 | Zinc finger protein basonuclin-1.                                                                                                                                                                                                                        | Nuclear |
| Q03112 | Ecotropic virus integration site 1 protein homolog (EVI-1).                                                                                                                                                                                              | Nuclear |
| Q03701 | [CCAAT/enhancer-binding protein zeta (CCAAT-box-binding transcription, factor) (CCAAT-binding factor) (CBF).]                                                                                                                                            | Nuclear |
| Q04743 | [Homeobox protein EMX2 (Empty spiracles homolog 2) (Empty spiracles-, like protein 2).]                                                                                                                                                                  | Nuclear |
| Q05516 | [Zinc finger and BTB domain-containing protein 16 (Zinc finger protein, PLZF) (Promyelocytic leukemia zinc finger protein) (Zinc finger, protein 145).]                                                                                                  | Nuclear |
| Q12950 | [Forkhead box protein D4 (Forkhead-related protein FKHL9) (Forkhead-, related transcription factor 5) (FREAC-5) (Myeloid factor-alpha).]                                                                                                                 | Nuclear |
| Q13127 | [RE1-silencing transcription factor (Neural-restrictive silencer, factor) (X2 box repressor).]                                                                                                                                                           | Nuclear |
| Q13283 | [Ras GTPase-activating protein-binding protein 1 (EC 3.6.1.-) (G3BP-1), (ATP-dependent DNA helicase VIII) (HDH-VIII) (GAP SH3 domain-binding, protein 1).]                                                                                               | Nuclear |
| Q92988 | Homeobox protein DLX-4 (DLX-7) (DLX-8) (Beta protein 1).                                                                                                                                                                                                 | Nuclear |
| Q99676 | Zinc finger protein 184.                                                                                                                                                                                                                                 | Nuclear |
| Q9UBC3 | [DNA (cytosine-5)-methyltransferase 3B (EC 2.1.1.37) (Dnmt3b) (DNA, methyltransferase HsaIIIB) (DNA MTase HsaIIIB) (M.HsaIIIB).]                                                                                                                         | Nuclear |
| Q9UBU8 | [Mortality factor 4-like protein 1 (MORF-related gene 15 protein), (Transcription factor-like protein MRG15) (MSL3-1 protein).]                                                                                                                          | Nuclear |
| Q9UHC1 | DNA mismatch repair protein Mlh3 (MutL protein homolog 3).                                                                                                                                                                                               | Nuclear |
| Q9UKS7 | Zinc finger protein Helios (Ikaros family zinc finger protein 2).                                                                                                                                                                                        | Nuclear |
| Q9UL36 | Zinc finger protein 236.                                                                                                                                                                                                                                 | Nuclear |
| Q9UL59 | [Zinc finger protein 214 (BWSCR2-associated zinc finger protein 1) (BAZ, 1).]                                                                                                                                                                            | Nuclear |
| Q9ULV3 | Cip1-interacting zinc finger protein (Nuclear protein NP94).                                                                                                                                                                                             | Nuclear |
| Q9ULW0 | [Targeting protein for Xkfp2 (Restricted expression proliferation-, associated protein 100) (p100) (Differentially expressed in cancerous, and non-cancerous lung cells 2) (DIL-2) (Protein fls353), (Hepatocellular carcinoma-associated antigen 519).] | Nuclear |
| Q9Y2L8 | [Zinc finger protein with KRAB and SCAN domains 5 (Zinc finger protein, 95 homolog) (Zfp-95).]                                                                                                                                                           | Nuclear |
| Q9Y333 | [U6 snRNA-associated Sm-like protein LSm2 (snRNP core Sm-like protein, Sm-x5) (Small nuclear ribonuclear protein D homolog) (Protein G7b).]                                                                                                              | Nuclear |
| O00258 | Tryptophan-rich protein (Congenital heart disease 5 protein).                                                                                                                                                                                            | Nuclear |
| O00358 | [Forkhead box protein E1 (Thyroid transcription factor 2) (TTF-2), (Forkhead-related protein FKHL15).]                                                                                                                                                   | Nuclear |
| O14628 | Zinc finger protein 195.                                                                                                                                                                                                                                 | Nuclear |
| O14981 | [TATA-binding protein-associated factor 172 (EC 3.6.1.-) (ATP-dependent, helicase BTAF1) (TBP-associated factor 172) (TAF-172) (TAF(II)170) (B-, TFIID transcription factor-associated 170 kDa subunit).]                                                | Nuclear |
| O15117 | [FYN-binding protein (FYN-T-binding protein) (FYB-120/130) (p120/p130), (SLP-76-associated phosphoprotein) (SLAP-130) (Adhesion and, degranulation promoting adaptor protein) (ADAP).]                                                                   | Nuclear |
| O15297 | [Protein phosphatase 1D (EC 3.1.3.16) (Protein phosphatase 2C isoform, delta) (PP2C-delta) (p53-induced protein phosphatase 1) (Protein, phosphatase magnesium-dependent 1 delta).]                                                                      | Nuclear |
| O43345 | Zinc finger protein 208.                                                                                                                                                                                                                                 | Nuclear |
| O43390 | Heterogeneous nuclear ribonucleoprotein R (hnRNP R).                                                                                                                                                                                                     | Nuclear |
| O43623 | [Zinc finger protein SLUG (Neural crest transcription factor Slug), (Snail homolog 2).]                                                                                                                                                                  | Nuclear |
| O43707 | [Alpha-actinin-4 (Non-muscle alpha-actinin 4) (F-actin cross-linking, protein).]                                                                                                                                                                         | Nuclear |

|        |                                                                                                                                                                                                                                                                                                          |         |
|--------|----------------------------------------------------------------------------------------------------------------------------------------------------------------------------------------------------------------------------------------------------------------------------------------------------------|---------|
| O60583 | Cyclin-T2 (CycT2).                                                                                                                                                                                                                                                                                       | Nuclear |
| O75346 | [Zinc finger protein 253 (Bone marrow zinc finger 1) (BMZF-1) (Zinc, finger protein 411).]                                                                                                                                                                                                               | Nuclear |
| O75417 | DNA polymerase theta (EC 2.7.7.7) (DNA polymerase eta).                                                                                                                                                                                                                                                  | Nuclear |
| O75478 | Transcriptional adapter 2-like (ADA2-like protein).                                                                                                                                                                                                                                                      | Nuclear |
| P10073 | [Zinc finger and SCAN domain-containing protein 22 (Zinc finger protein, 50) (Krueppel-related zinc finger protein 2) (Protein HKR2).]                                                                                                                                                                   | Nuclear |
| P15036 | Protein C-ets-2.                                                                                                                                                                                                                                                                                         | Nuclear |
| P17026 | Zinc finger protein 22 (Zinc finger protein KOX15) (Krox-26 protein).                                                                                                                                                                                                                                    | Nuclear |
| P17036 | [Zinc finger protein 3 (Zinc finger protein KOX25) (Zinc finger protein, HF.12) (HZF3.1).]                                                                                                                                                                                                               | Nuclear |
| P17980 | [26S protease regulatory subunit 6A (Proteasome 26S subunit ATPase 3), (Tat-binding protein 1) (TBP-1) (Proteasome subunit P50).]                                                                                                                                                                        | Nuclear |
| P18858 | [DNA ligase 1 (EC 6.5.1.1) (DNA ligase I) (Polydeoxyribonucleotide, synthase [ATP] 1).]                                                                                                                                                                                                                  | Nuclear |
| P19544 | Wilms tumor protein (WT33).                                                                                                                                                                                                                                                                              | Nuclear |
| P42685 | [Tyrosine-protein kinase FRK (EC 2.7.10.2) (FYN-related kinase), (Nuclear tyrosine protein kinase RAK).]                                                                                                                                                                                                 | Nuclear |
| P43694 | Transcription factor GATA-4 (GATA-binding factor 4).                                                                                                                                                                                                                                                     | Nuclear |
| P46087 | [Putative RNA methyltransferase NOL1 (EC 2.1.1.-) (Proliferating-cell, nucleolar antigen p120) (Proliferation-associated nucleolar protein, p120).]                                                                                                                                                      | Nuclear |
| P48431 | Transcription factor SOX-2.                                                                                                                                                                                                                                                                              | Nuclear |
| P48552 | [Nuclear receptor-interacting protein 1 (Nuclear factor RIP140), (Receptor-interacting protein 140).]                                                                                                                                                                                                    | Nuclear |
| P49910 | [Zinc finger protein 165 (LD65) (Zinc finger and SCAN domain-containing, protein 7) (Cancer/testis antigen 53) (CT53).]                                                                                                                                                                                  | Nuclear |
| P49916 | [DNA ligase 3 (EC 6.5.1.1) (DNA ligase III) (Polydeoxyribonucleotide, synthase [ATP] 3).]                                                                                                                                                                                                                | Nuclear |
| P51508 | Zinc finger protein 81 (HFZ20).                                                                                                                                                                                                                                                                          | Nuclear |
| P51522 | [Zinc finger protein 83 (Zinc finger protein 816B) (Zinc finger protein, HPF1).]                                                                                                                                                                                                                         | Nuclear |
| P51532 | [Probable global transcription activator SNF2L4 (EC 3.6.1.-) (ATP-, dependent helicase SMARCA4) (SNF2-beta) (BRG-1 protein) (Mitotic, growth and transcription activator) (Brahma protein homolog 1), (SWI/SNF-related matrix-associated actin-dependent regulator of, chromatin subfamily A member 4).] | Nuclear |
| P51826 | [AF4/FMR2 family member 3 (Protein LAF-4) (Lymphoid nuclear protein, related to AF4).]                                                                                                                                                                                                                   | Nuclear |
| P51946 | Cyclin-H (MO15-associated protein) (p37) (p34).                                                                                                                                                                                                                                                          | Nuclear |
| P52298 | [Nuclear cap-binding protein subunit 2 (20 kDa nuclear cap-binding, protein) (NCBP 20 kDa subunit) (CBP20) (NCBP-interacting protein 1), (NIP1) (Cell proliferation-inducing gene 55 protein).]                                                                                                          | Nuclear |
| P52742 | Zinc finger protein 135 (Zinc finger protein 61).                                                                                                                                                                                                                                                        | Nuclear |
| P54727 | [UV excision repair protein RAD23 homolog B (hHR23B) (XP-C repair-, complementing complex 58 kDa protein) (p58).]                                                                                                                                                                                        | Nuclear |
| P55895 | V(D)J recombination-activating protein 2 (RAG-2).                                                                                                                                                                                                                                                        | Nuclear |
| Q13416 | Origin recognition complex subunit 2.                                                                                                                                                                                                                                                                    | Nuclear |
| Q13428 | Treacle protein (Treacher Collins syndrome protein).                                                                                                                                                                                                                                                     | Nuclear |
| Q13472 | DNA topoisomerase 3-alpha (EC 5.99.1.2) (DNA topoisomerase III alpha).                                                                                                                                                                                                                                   | Nuclear |
| Q13526 | [Peptidyl-prolyl cis-trans isomerase NIMA-interacting 1 (EC 5.2.1.8), (Rotamase Pin1) (PPIase Pin1).]                                                                                                                                                                                                    | Nuclear |
| Q13574 | [Diacylglycerol kinase zeta (EC 2.7.1.107) (Diglyceride kinase zeta), (DGK-zeta) (DAG kinase zeta).]                                                                                                                                                                                                     | Nuclear |

|        |                                                                                                                                                                                                                                                       |         |
|--------|-------------------------------------------------------------------------------------------------------------------------------------------------------------------------------------------------------------------------------------------------------|---------|
| Q13627 | [Dual specificity tyrosine-phosphorylation-regulated kinase 1A, (EC 2.7.12.1) (Protein kinase minibrain homolog) (MNBH) (HP86) (Dual, specificity YAK1-related kinase) (hMNB).]                                                                       | Nuclear |
| Q13823 | Nucleolar GTP-binding protein 2 (Autoantigen NGP-1).                                                                                                                                                                                                  | Nuclear |
| Q14192 | [Four and a half LIM domains protein 2 (FHL-2) (Skeletal muscle LIM-, protein 3) (SLIM 3) (LIM domain protein DRAL).]                                                                                                                                 | Nuclear |
| Q14693 | Lipin-1.                                                                                                                                                                                                                                              | Nuclear |
| Q14929 | Zinc finger protein 169.                                                                                                                                                                                                                              | Nuclear |
| Q15014 | [Mortality factor 4-like protein 2 (MORF-related gene X protein), (Transcription factor-like protein MRGX) (MSL3-2 protein).]                                                                                                                         | Nuclear |
| Q15054 | DNA polymerase subunit delta-3 (DNA polymerase subunit delta p66).                                                                                                                                                                                    | Nuclear |
| Q15349 | [Ribosomal protein S6 kinase alpha-2 (EC 2.7.11.1) (S6K-alpha 2) (90, kDa ribosomal protein S6 kinase 2) (p90-RSK 2) (Ribosomal S6 kinase 3), (RSK-3) (pp90RSK3) (MAP kinase-activated protein kinase 1c), (MAPKAPK1C).]                              | Nuclear |
| Q15393 | [Splicing factor 3B subunit 3 (Spliceosome-associated protein 130) (SAP, 130) (SF3b130) (Pre-mRNA-splicing factor SF3b 130 kDa subunit), (STAF130).]                                                                                                  | Nuclear |
| Q15633 | [TAR RNA-binding protein 2 (Trans-activation-responsive RNA-binding, protein).]                                                                                                                                                                       | Nuclear |
| Q16181 | Septin-7 (CDC10 protein homolog).                                                                                                                                                                                                                     | Nuclear |
| Q16384 | [Protein SSX1 (Synovial sarcoma, X breakpoint 1) (Cancer/testis antigen, 5.1) (CT5.1).]                                                                                                                                                               | Nuclear |
| Q16527 | [Cysteine and glycine-rich protein 2 (Cysteine-rich protein 2) (CRP2), (Smooth muscle cell LIM protein) (SmLIM) (LIM domain only protein 5).]                                                                                                         | Nuclear |
| Q16629 | Splicing factor, arginine/serine-rich 7 (Splicing factor 9G8).                                                                                                                                                                                        | Nuclear |
| Q16666 | [Gamma-interferon-inducible protein Ii-16 (Interferon-inducible, myeloid differentiation transcriptional activator) (IFI 16).]                                                                                                                        | Nuclear |
| Q8IXQ6 | [Poly [ADP-ribose] polymerase 9 (EC 2.4.2.30) (PARP-9) (B aggressive, lymphoma protein).]                                                                                                                                                             | Nuclear |
| Q92794 | [Histone acetyltransferase MYST3 (EC 2.3.1.48) (EC 2.3.1.-) (MYST, protein 3) (MOZ, YBF2/SAS3, SAS2 and TIP60 protein 3) (Runt-related, transcription factor-binding protein 2) (Monocytic leukemia zinc, finger protein) (Zinc finger protein 220).] | Nuclear |
| Q92949 | [Forkhead box protein J1 (Forkhead-related protein FKHL13) (Hepatocyte, nuclear factor 3 forkhead homolog 4) (HFH-4).]                                                                                                                                | Nuclear |
| O94782 | [Ubiquitin carboxyl-terminal hydrolase 1 (EC 3.1.2.15) (Ubiquitin, thioesterase 1) (Ubiquitin-specific-processing protease 1), (Deubiquitinating enzyme 1) (hUBP).]                                                                                   | Nuclear |
| O95696 | Bromodomain-containing protein 1 (BR140-like protein).                                                                                                                                                                                                | Nuclear |
| O95935 | T-box transcription factor TBX18 (T-box protein 18).                                                                                                                                                                                                  | Nuclear |
| O95985 | [DNA topoisomerase 3-beta-1 (EC 5.99.1.2) (DNA topoisomerase III beta-, 1).]                                                                                                                                                                          | Nuclear |
| P21580 | [Tumor necrosis factor, alpha-induced protein 3 (EC 3.-.-) (Putative, DNA-binding protein A20) (Zinc finger protein A20).]                                                                                                                            | Nuclear |
| P22626 | Heterogeneous nuclear ribonucleoproteins A2/B1 (hnRNP A2 / hnRNP B1).                                                                                                                                                                                 | Nuclear |
| P23025 | [DNA-repair protein complementing XP-A cells (Xeroderma pigmentosum, group A-complementing protein).]                                                                                                                                                 | Nuclear |
| P25205 | [DNA replication licensing factor MCM3 (DNA polymerase alpha, holoenzyme-associated protein P1) (RLF subunit beta) (P102 protein), (P1-MCM3).]                                                                                                        | Nuclear |
| P28340 | [DNA polymerase delta catalytic subunit (EC 2.7.7.7) (DNA polymerase, subunit delta p125).]                                                                                                                                                           | Nuclear |
| P29375 | [Histone demethylase JARID1A (EC 1.14.11.-) (Jumonji/ARID domain-, containing protein 1A) (Retinoblastoma-binding protein 2) (RBBP-2).]                                                                                                               | Nuclear |
| P33991 | DNA replication licensing factor MCM4 (CDC21 homolog) (P1-CDC21).                                                                                                                                                                                     | Nuclear |
| P35274 | Zinc finger protein 125 (HZF-3) (Fragment).                                                                                                                                                                                                           | Nuclear |
| P38432 | Coilin (p80).                                                                                                                                                                                                                                         | Nuclear |

|        |                                                                                                                                                                                                                                                                                                                                      |         |
|--------|--------------------------------------------------------------------------------------------------------------------------------------------------------------------------------------------------------------------------------------------------------------------------------------------------------------------------------------|---------|
| P40424 | [Pre-B-cell leukemia transcription factor 1 (Homeobox protein PBX1), (Homeobox protein PRL).]                                                                                                                                                                                                                                        | Nuclear |
| P40692 | DNA mismatch repair protein Mlh1 (MutL protein homolog 1).                                                                                                                                                                                                                                                                           | Nuclear |
| P41182 | [B-cell lymphoma 6 protein (BCL-6) (Zinc finger protein 51) (LAZ-3, protein) (BCL-5) (Zinc finger and BTB domain-containing protein 27).]                                                                                                                                                                                            | Nuclear |
| P62314 | [Small nuclear ribonucleoprotein Sm D1 (snRNP core protein D1) (Sm-D1), (Sm-D autoantigen).]                                                                                                                                                                                                                                         | Nuclear |
| P62988 | Ubiquitin.                                                                                                                                                                                                                                                                                                                           | Nuclear |
| Q9BZE4 | [Nucleolar GTP-binding protein 1 (Chronic renal failure gene protein), (GTP-binding protein NGB).]                                                                                                                                                                                                                                   | Nuclear |
| Q00839 | [Heterogeneous nuclear ribonucleoprotein U (hnRNP U) (Scaffold, attachment factor A) (SAF-A) (p120) (pp120).]                                                                                                                                                                                                                        | Nuclear |
| Q00987 | [E3 ubiquitin-protein ligase Mdm2 (EC 6.3.2.-) (p53-binding protein, Mdm2) (Oncoprotein Mdm2) (Double minute 2 protein) (Hdm2).]                                                                                                                                                                                                     | Nuclear |
| Q01196 | [Runt-related transcription factor 1 (Core-binding factor, alpha 2, subunit) (CBF-alpha 2) (Acute myeloid leukemia 1 protein) (Oncogene, AML-1) (Polyomavirus enhancer-binding protein 2 alpha B subunit), (PEBP2-alpha B) (PEA2-alpha B) (SL3-3 enhancer factor 1 alpha B, subunit) (SL3/AKV core-binding factor alpha B subunit).] | Nuclear |
| Q01538 | [Myelin transcription factor 1 (MyT1) (MyTI) (Proteolipid protein-, binding protein) (PLPB1).]                                                                                                                                                                                                                                       | Nuclear |
| Q01850 | [Cerebellar degeneration-related protein 2 (Paraneoplastic cerebellar, degeneration-associated antigen) (Major Yo paraneoplastic antigen).]                                                                                                                                                                                          | Nuclear |
| Q03181 | [Peroxisome proliferator-activated receptor delta (PPAR-delta) (PPAR-, beta) (Nuclear hormone receptor 1) (NUC1) (NUC1).]                                                                                                                                                                                                            | Nuclear |
| Q03828 | Homeobox even-skipped homolog protein 2 (EVX-2).                                                                                                                                                                                                                                                                                     | Nuclear |
| Q04727 | Transducin-like enhancer protein 4.                                                                                                                                                                                                                                                                                                  | Nuclear |
| Q05481 | Zinc finger protein 91 (Zinc finger protein HTF10) (HPF7).                                                                                                                                                                                                                                                                           | Nuclear |
| Q05519 | [Splicing factor arginine/serine-rich 11 (Arginine-rich 54 kDa nuclear, protein) (p54).]                                                                                                                                                                                                                                             | Nuclear |
| Q06265 | [Exosome complex exonuclease RRP45 (EC 3.1.13.-) (Exosome component 9), (Polymyositis/scleroderma autoantigen 1) (Autoantigen PM/Scl 1), (Polymyositis/scleroderma autoantigen 75 kDa) (PM/Scl-75) (P75, polymyositis-scleroderma overlap syndrome-associated autoantigen).]                                                         | Nuclear |
| Q06730 | [Zinc finger protein 33A (Zinc finger protein 11A) (Zinc finger protein, KOX31) (Zinc finger and ZAK-associated protein with KRAB domain), (ZZaPK).]                                                                                                                                                                                 | Nuclear |
| Q07869 | Peroxisome proliferator-activated receptor alpha (PPAR-alpha).                                                                                                                                                                                                                                                                       | Nuclear |
| Q09028 | [Histone-binding protein RBBP4 (Retinoblastoma-binding protein 4), (RBBP-4) (Retinoblastoma-binding protein p48) (Chromatin assembly, factor 1 subunit C) (CAF-1 subunit C) (Chromatin assembly factor I p48, subunit) (CAF-I 48 kDa subunit) (CAF-I p48) (Nucleosome-remodeling, factor subunit RBAP48).]                           | Nuclear |
| Q09666 | [Neuroblast differentiation-associated protein AHNAK (Desmoyokin), (Fragments).]                                                                                                                                                                                                                                                     | Nuclear |
| Q12951 | [Forkhead box protein l1 (Forkhead-related protein FKHL10) (Forkhead-, related transcription factor 6) (FREAC-6) (Hepatocyte nuclear factor 3, forkhead homolog 3) (HNF-3/fork-head homolog 3) (HFH-3).]                                                                                                                             | Nuclear |
| Q13049 | [Tripartite motif-containing protein 32 (EC 6.3.2.-) (Zinc finger, protein HT2A) (72 kDa Tat-interacting protein).]                                                                                                                                                                                                                  | Nuclear |
| Q13115 | [Dual specificity protein phosphatase 4 (EC 3.1.3.48) (EC 3.1.3.16), (Mitogen-activated protein kinase phosphatase 2) (MAP kinase, phosphatase 2) (MKP-2) (Dual specificity protein phosphatase hVH2).]                                                                                                                              | Nuclear |
| Q13268 | [Dehydrogenase/reductase SDR family member 2 (EC 1.1.-.-) (HEP27, protein) (Protein D).]                                                                                                                                                                                                                                             | Nuclear |
| Q13285 | [Steroidogenic factor 1 (STF-1) (SF-1) (Adrenal 4-binding protein), (Steroid hormone receptor Ad4BP) (Fushi tarazu factor homolog 1).]                                                                                                                                                                                               | Nuclear |
| Q99081 | [Transcription factor 12 (Transcription factor HTF-4) (E-box-binding, protein) (DNA-binding protein HTF4).]                                                                                                                                                                                                                          | Nuclear |



|        |                                                                                                                                                                                                                         |         |
|--------|-------------------------------------------------------------------------------------------------------------------------------------------------------------------------------------------------------------------------|---------|
| Q99708 | [Retinoblastoma-binding protein 8 (RBBP-8) (CtBP-interacting protein), (CtIP) (Retinoblastoma-interacting protein and myosin-like) (RIM).]                                                                              | Nuclear |
| Q99801 | Homeobox protein Nkx-3.1.                                                                                                                                                                                               | Nuclear |
| Q9HB58 | [Sp110 nuclear body protein (Speckled 110 kDa) (Transcriptional, coactivator Sp110) (Interferon-induced protein 41/75).]                                                                                                | Nuclear |
| Q9NYV4 | [Cell division cycle 2-related protein kinase 7 (EC 2.7.11.22) (CDC2-, related protein kinase 7) (Cdc2-related kinase, arginine/serine-rich), (CrkRS).]                                                                 | Nuclear |
| Q9UDV7 | Zinc finger protein 282 (HTLV-I U5RE-binding protein 1) (HUB-1).                                                                                                                                                        | Nuclear |
| Q9UEE5 | [Serine/threonine-protein kinase 17A (EC 2.7.11.1) (DAP kinase-related, apoptosis-inducing protein kinase 1).]                                                                                                          | Nuclear |
| Q9UGU5 | High mobility group protein 2-like 1 (Protein HMGBCG).                                                                                                                                                                  | Nuclear |
| Q9UMN6 | [WW domain-binding protein 7 (Myeloid/lymphoid or mixed-lineage, leukemia protein 4) (Trithorax homolog 2).]                                                                                                            | Nuclear |
| Q9UPN9 | [E3 ubiquitin-protein ligase TRIM33 (EC 6.3.2.-) (Tripartite motif-, containing protein 33) (Transcription intermediary factor 1-gamma), (TIF1-gamma) (Ectodermin homolog) (RET-fused gene 7 protein) (Protein, Rfg7).] | Nuclear |
| Q9Y2P8 | RNA 3'-terminal phosphate cyclase-like protein.                                                                                                                                                                         | Nuclear |
| Q9Y2T1 | [Axin-2 (Axis inhibition protein 2) (Conductin) (Axin-like protein), (Axil).]                                                                                                                                           | Nuclear |
| Q9Y2U8 | Inner nuclear membrane protein Man1 (LEM domain-containing protein 3).                                                                                                                                                  | Nuclear |
| Q9Y2X9 | [Zinc finger protein 281 (Zinc finger DNA-binding protein 99), (Transcription factor ZBP-99) (GC-box-binding zinc finger protein 1).]                                                                                   | Nuclear |
| O00567 | Nucleolar protein 5A (Nucleolar protein Nop56).                                                                                                                                                                         | Nuclear |
| O14901 | [Krueppel-like factor 11 (Transforming growth factor-beta-inducible, early growth response protein 2) (TGFB-inducible early growth response, protein 2) (TIEG-2).]                                                      | Nuclear |
| O15164 | [Transcription intermediary factor 1-alpha (TIF1-alpha) (Tripartite, motif-containing protein 24) (RING finger protein 82).]                                                                                            | Nuclear |
| O15353 | Forkhead box protein N1 (Winged-helix transcription factor nude).                                                                                                                                                       | Nuclear |
| O15457 | MutS protein homolog 4.                                                                                                                                                                                                 | Nuclear |
| O43251 | [RNA-binding protein 9 (RNA-binding motif protein 9), (Hexaribonucleotide-binding protein 2) (Repressor of tamoxifen, transcriptional activity).]                                                                       | Nuclear |
| O43435 | [T-box transcription factor TBX1 (T-box protein 1) (Testis-specific T-, box protein).]                                                                                                                                  | Nuclear |
| O43502 | DNA repair protein RAD51 homolog 3 (R51H3) (RAD51-like protein 2).                                                                                                                                                      | Nuclear |
| O43593 | Protein hairless.                                                                                                                                                                                                       | Nuclear |
| O43781 | [Dual specificity tyrosine-phosphorylation-regulated kinase 3, (EC 2.7.12.1) (Regulatory erythroid kinase) (REDK).]                                                                                                     | Nuclear |
| O43823 | A-kinase anchor protein 8 (A-kinase anchor protein 95 kDa) (AKAP 95).                                                                                                                                                   | Nuclear |
| O43913 | Origin recognition complex subunit 5.                                                                                                                                                                                   | Nuclear |
| O60315 | [Zinc finger E-box-binding homeobox 2 (Zinc finger homeobox protein 1b), (Smad-interacting protein 1) (SMADIP1).]                                                                                                       | Nuclear |
| O60832 | [H/ACA ribonucleoprotein complex subunit 4 (EC 5.4.99.-) (Dyskerin), (Nucleolar protein family A member 4) (snoRNP protein DKC1) (Nopp140-, associated protein of 57 kDa) (Nucleolar protein NAP57) (CBF5, homolog).]   | Nuclear |
| O60942 | [mRNA-capping enzyme (HCE) (HCAP1) [Includes: Polynucleotide 5'-, triphosphatase (EC 3.1.3.33) (mRNA 5'-triphosphatase) (TPase); mRNA, guanylyltransferase (EC 2.7.7.50) (GTP--RNA guanylyltransferase), (GTase)].]     | Nuclear |
| O75419 | CDC45-related protein (PORC-PI-1) (Cdc45).                                                                                                                                                                              | Nuclear |
| P09629 | Homeobox protein Hox-B7 (Hox-2C) (HHO.C1).                                                                                                                                                                              | Nuclear |
| P09874 | [Poly [ADP-ribose] polymerase 1 (EC 2.4.2.30) (PARP-1) (ADPRT) (NAD(+), ADP-ribosyltransferase 1) (Poly[ADP-ribose] synthetase 1).]                                                                                     | Nuclear |

|        |                                                                                                                                                                                                                                    |         |
|--------|------------------------------------------------------------------------------------------------------------------------------------------------------------------------------------------------------------------------------------|---------|
| P11387 | DNA topoisomerase 1 (EC 5.99.1.2) (DNA topoisomerase I).                                                                                                                                                                           | Nuclear |
| P11474 | [Steroid hormone receptor ERR1 (Estrogen-related receptor, alpha) (ERR-, alpha) (Estrogen receptor-like 1).]                                                                                                                       | Nuclear |
| P14635 | G2/mitotic-specific cyclin-B1.                                                                                                                                                                                                     | Nuclear |
| P15822 | [Zinc finger protein 40 (Human immunodeficiency virus type I enhancer-, binding protein 1) (HIV-EP1) (Major histocompatibility complex-binding, protein 1) (MBP-1) (Positive regulatory domain II-binding factor 1), (PRDII-BF1).] | Nuclear |
| P15927 | [Replication protein A 32 kDa subunit (RP-A) (RF-A) (Replication, factor-A protein 2) (p32) (p34).]                                                                                                                                | Nuclear |
| P16220 | cAMP response element-binding protein (CREB).                                                                                                                                                                                      | Nuclear |
| P17029 | [Zinc finger protein with KRAB and SCAN domains 1 (Zinc finger protein, 36) (Zinc finger protein KOX18).]                                                                                                                          | Nuclear |
| P17038 | [Zinc finger protein 43 (Zinc protein HTF6) (Zinc finger protein, KOX27).]                                                                                                                                                         | Nuclear |
| P17480 | [Nucleolar transcription factor 1 (Upstream-binding factor 1) (UBF-1), (Autoantigen NOR-90).]                                                                                                                                      | Nuclear |
| P19388 | [DNA-directed RNA polymerases I, II, and III subunit RPABC1 (RNA, polymerases I, II, and III subunit ABC1) (DNA-directed RNA polymerase, II subunit E) (RPB5) (DNA-directed RNA polymerase II 23 kDa, polypeptide) (XAP4).]        | Nuclear |
| P42166 | [Lamina-associated polypeptide 2 isoform alpha (Thymopoietin isoform, alpha) (TP alpha) (Thymopoietin-related peptide isoform alpha) (TPRP, isoform alpha) [Contains: Thymopoietin (TP) (Splenin); Thymopentin, (TP5)].]           | Nuclear |
| P48436 | Transcription factor SOX-9.                                                                                                                                                                                                        | Nuclear |
| P49321 | Nuclear autoantigenic sperm protein (NASP).                                                                                                                                                                                        | Nuclear |
| P49711 | [Transcriptional repressor CTCF (CCCTC-binding factor) (CTCFL paralogs), (11-zinc finger protein).]                                                                                                                                | Nuclear |
| P51814 | Zinc finger protein 41.                                                                                                                                                                                                            | Nuclear |
| P52756 | [RNA-binding protein 5 (RNA-binding motif protein 5) (Tumor suppressor, LUCA15) (Protein G15) (Renal carcinoma antigen NY-REN-9).]                                                                                                 | Nuclear |
| P53805 | [Calcipressin-1 (Regulator of calcineurin 1) (Down syndrome critical, region protein 1) (Myocyte-enriched calcineurin-interacting protein 1), (MCIP1) (Adapt78).]                                                                  | Nuclear |
| P54198 | Protein HIRA (TUP1-like enhancer of split protein 1).                                                                                                                                                                              | Nuclear |
| P54274 | [Telomeric repeat-binding factor 1 (TTAGGG repeat-binding factor 1), (NIMA-interacting protein 2) (Telomeric protein Pin2/TRF1).]                                                                                                  | Nuclear |
| P55201 | [Peregrin (Bromodomain and PHD finger-containing protein 1) (BR140, protein).]                                                                                                                                                     | Nuclear |
| Q13595 | Transformer-2 protein homolog (TRA-2 alpha).                                                                                                                                                                                       | Nuclear |
| Q13838 | [Spliceosome RNA helicase BAT1 (EC 3.6.1.-) (DEAD box protein UAP56), (56 kDa U2AF65-associated protein) (ATP-dependent RNA helicase p47), (HLA-B-associated transcript-1).]                                                       | Nuclear |
| Q13891 | [Transcription factor BTF3 homolog 2 (Basic transcription factor 3-like, 2).]                                                                                                                                                      | Nuclear |
| Q14103 | [Heterogeneous nuclear ribonucleoprotein D0 (hnRNP D0) (AU-rich element, RNA-binding protein 1).]                                                                                                                                  | Nuclear |
| Q14690 | RRP5 protein homolog (Programmed cell death protein 11).                                                                                                                                                                           | Nuclear |
| Q15233 | [Non-POU domain-containing octamer-binding protein (NonO protein) (54, kDa nuclear RNA- and DNA-binding protein) (p54(nrb)) (p54nrb) (55 kDa, nuclear protein) (NMT55) (DNA-binding p52/p100 complex, 52 kDa, subunit).]           | Nuclear |
| Q15326 | [Zinc finger MYND domain-containing protein 11 (Adenovirus 5 E1A-, binding protein) (BS69 protein).]                                                                                                                               | Nuclear |
| Q15562 | [Transcriptional enhancer factor TEF-4 (TEA domain family member 2), (TEAD-2).]                                                                                                                                                    | Nuclear |
| Q15596 | [Nuclear receptor coactivator 2 (NCoA-2) (Transcriptional intermediary, factor 2).]                                                                                                                                                | Nuclear |
| Q92481 | [Transcription factor AP-2 beta (AP2-beta) (Activating enhancer-binding, protein 2 beta).]                                                                                                                                         | Nuclear |
| Q92570 | [Orphan nuclear receptor NR4A3 (Nuclear hormone receptor NOR-1), (Neuron-derived orphan receptor 1) (Mitogen-induced nuclear orphan, receptor).]                                                                                   | Nuclear |

|        |                                                                                                                                                                                                                                                                                                                        |         |
|--------|------------------------------------------------------------------------------------------------------------------------------------------------------------------------------------------------------------------------------------------------------------------------------------------------------------------------|---------|
| Q92620 | [Pre-mRNA-splicing factor ATP-dependent RNA helicase PRP16 (EC 3.6.1.-), (ATP-dependent RNA helicase DHX38) (DEAH box protein 38).]                                                                                                                                                                                    | Nuclear |
| Q92791 | Nucleolar autoantigen No55.                                                                                                                                                                                                                                                                                            | Nuclear |
| Q92841 | [Probable ATP-dependent RNA helicase DDX17 (EC 3.6.1.-) (DEAD box, protein 17) (RNA-dependent helicase p72) (DEAD box protein p72).]                                                                                                                                                                                   | Nuclear |
| Q92879 | [CUG-BP- and ETR-3-like factor 1 (CELF-1) (Bruno-like protein 2) (RNA-, binding protein BRUNOL-2) (CUG triplet repeat RNA-binding protein 1), (CUG-BP1) (Deadenylation factor CUG-BP) (50 kDa nuclear polyadenylated, RNA-binding protein) (Embryo deadenylation element-binding protein, homolog) (EDEN-BP homolog).] | Nuclear |
| O95602 | [DNA-directed RNA polymerase I subunit RPA1 (EC 2.7.7.6) (DNA-directed, RNA polymerase I largest subunit) (RNA polymerase I 194 kDa subunit), (RPA194) (A190).]                                                                                                                                                        | Nuclear |
| O95751 | Protein LDOC1 (Leucine zipper protein down-regulated in cancer cells).                                                                                                                                                                                                                                                 | Nuclear |
| P25786 | [Proteasome subunit alpha type-1 (EC 3.4.25.1) (Proteasome component, C2) (Macropain subunit C2) (Multicatalytic endopeptidase complex, subunit C2) (Proteasome nu chain) (30 kDa prosomal protein) (PROS-30).]                                                                                                        | Nuclear |
| P01100 | [Proto-oncogene protein c-fos (Cellular oncogene fos) (G0/G1 switch, regulatory protein 7).]                                                                                                                                                                                                                           | Nuclear |
| P22415 | Upstream stimulatory factor 1 (Major late transcription factor 1).                                                                                                                                                                                                                                                     | Nuclear |
| P24864 | G1/S-specific cyclin-E1.                                                                                                                                                                                                                                                                                               | Nuclear |
| P26358 | [DNA (cytosine-5)-methyltransferase 1 (EC 2.1.1.37) (Dnmt1) (DNA, methyltransferase Hsa1) (DNA MTase Hsa1) (MCMT) (M.Hsa1).]                                                                                                                                                                                           | Nuclear |
| P26599 | [Polypyrimidine tract-binding protein 1 (PTB) (Heterogeneous nuclear, ribonucleoprotein I) (hnRNP I) (57 kDa RNA-binding protein PPTB-1).]                                                                                                                                                                             | Nuclear |
| P31269 | Homeobox protein Hox-A9 (Hox-1G).                                                                                                                                                                                                                                                                                      | Nuclear |
| P33240 | [Cleavage stimulation factor 64 kDa subunit (CSTF 64 kDa subunit) (CF-1, 64 kDa subunit) (CstF-64).]                                                                                                                                                                                                                   | Nuclear |
| P33992 | DNA replication licensing factor MCM5 (CDC46 homolog) (P1-CDC46).                                                                                                                                                                                                                                                      | Nuclear |
| P35275 | Zinc finger protein 126 (HZF-2) (Fragment).                                                                                                                                                                                                                                                                            | Nuclear |
| P35637 | [RNA-binding protein FUS (Oncogene FUS) (Oncogene TLS) (Translocated in, liposarcoma protein) (POMp75) (75 kDa DNA-pairing protein).]                                                                                                                                                                                  | Nuclear |
| P38159 | [Heterogeneous nuclear ribonucleoprotein G (hnRNP G) (RNA-binding motif, protein, X chromosome) (Glycoprotein p43) [Contains: Processed, heterogeneous nuclear ribonucleoprotein G].]                                                                                                                                  | Nuclear |
| P58012 | Forkhead box protein L2.                                                                                                                                                                                                                                                                                               | Nuclear |
| P61326 | Protein mago nashi homolog.                                                                                                                                                                                                                                                                                            | Nuclear |
| P62316 | Small nuclear ribonucleoprotein Sm D2 (snRNP core protein D2) (Sm-D2).                                                                                                                                                                                                                                                 | Nuclear |
| P78332 | [RNA-binding protein 6 (RNA-binding motif protein 6) (RNA-binding, protein DEF-3) (Lung cancer antigen NY-LU-12) (Protein G16).]                                                                                                                                                                                       | Nuclear |
| P98168 | Zinc finger X-linked protein ZXDA.                                                                                                                                                                                                                                                                                     | Nuclear |
| P98175 | [RNA-binding protein 10 (RNA-binding motif protein 10) (G patch domain-, containing protein 9).]                                                                                                                                                                                                                       | Nuclear |
| Q02078 | [Myocyte-specific enhancer factor 2A (Serum response factor-like, protein 1).]                                                                                                                                                                                                                                         | Nuclear |
| Q03111 | Protein ENL (YEATS domain-containing protein 1).                                                                                                                                                                                                                                                                       | Nuclear |
| Q03164 | Zinc finger protein HRX (ALL-1) (Trithorax-like protein).                                                                                                                                                                                                                                                              | Nuclear |
| Q03924 | [Zinc finger protein 117 (Zinc finger protein HPF9) (Provirus-linked, krueppel) (h-PLK).]                                                                                                                                                                                                                              | Nuclear |
| Q04741 | [Homeobox protein EMX1 (Empty spiracles homolog 1) (Empty spiracles-, like protein 1).]                                                                                                                                                                                                                                | Nuclear |
| Q06587 | [E3 ubiquitin-protein ligase RING1 (EC 6.3.2.-) (Polycomb complex, protein RING1) (RING finger protein 1).]                                                                                                                                                                                                            | Nuclear |

|        |                                                                                                                                                                                                                                  |                  |
|--------|----------------------------------------------------------------------------------------------------------------------------------------------------------------------------------------------------------------------------------|------------------|
| Q06732 | [Zinc finger protein 33B (Zinc finger protein 11B) (Zinc finger protein, KOX2).]                                                                                                                                                 | Nuclear          |
| Q07864 | [DNA polymerase epsilon catalytic subunit A (EC 2.7.7.7) (DNA, polymerase II subunit A).]                                                                                                                                        | Nuclear          |
| Q09161 | [Nuclear cap-binding protein subunit 1 (80 kDa nuclear cap-binding, protein) (NCBP 80 kDa subunit) (CBP80).]                                                                                                                     | Nuclear          |
| Q12873 | [Chromodomain-helicase-DNA-binding protein 3 (EC 3.6.1.-) (ATP-, dependent helicase CHD3) (CHD-3) (Mi-2 autoantigen 240 kDa protein), (Mi2 alpha) (Zinc finger helicase) (hZFH).]                                                | Nuclear          |
| Q12952 | [Forkhead box protein L1 (Forkhead-related protein FKHL11) (Forkhead-, related transcription factor 7) (FREAC-7).]                                                                                                               | Nuclear          |
| Q13023 | [A-kinase anchor protein 6 (Protein kinase A-anchoring protein 6), (PRKA6) (A-kinase anchor protein 100 kDa) (AKAP 100) (mAKAP).]                                                                                                | Nuclear          |
| Q13185 | [Chromobox protein homolog 3 (Heterochromatin protein 1 homolog gamma), (HP1 gamma) (Modifier 2 protein) (HECH).]                                                                                                                | Nuclear          |
| Q13216 | [DNA excision repair protein ERCC-8 (Cockayne syndrome WD repeat, protein CSA).]                                                                                                                                                 | Nuclear          |
| Q13342 | [Nuclear body protein SP140 (Nuclear autoantigen Sp-140) (Speckled 140, kDa) (LYSp100 protein) (Lymphoid-restricted homolog of Sp100).]                                                                                          | Nuclear          |
| Q93009 | [Ubiquitin carboxyl-terminal hydrolase 7 (EC 3.1.2.15) (Ubiquitin, thioesterase 7) (Ubiquitin-specific-processing protease 7), (Deubiquitinating enzyme 7) (Herpesvirus-associated ubiquitin-specific, protease).]               | Nuclear          |
| Q99490 | [Centaurin-gamma 1 (ARF-GAP with GTP-binding protein-like, ankyrin, repeat and pleckstrin homology domains 2) (AGAP-2), (Phosphatidylinositol-3-kinase enhancer) (PIKE) (GTP-binding and, GTPase-activating protein 2) (GGAP2).] | Nuclear          |
| Q99543 | [DnaJ homolog subfamily C member 2 (Zuotin-related factor 1) (M-phase, phosphoprotein 11).]                                                                                                                                      | Nuclear          |
| Q9H161 | Homeobox protein aristaless-like 4.                                                                                                                                                                                              | Nuclear          |
| Q9NRM2 | Zinc finger protein 277.                                                                                                                                                                                                         | Nuclear          |
| Q9NSI6 | [Bromodomain and WD repeat-containing protein 1 (WD repeat-containing, protein 9).]                                                                                                                                              | Nuclear          |
| Q9P2Y4 | Zinc finger protein 219.                                                                                                                                                                                                         | Nuclear          |
| Q9UBP0 | Spastin.                                                                                                                                                                                                                         | Nuclear          |
| Q9UUK3 | [Poly [ADP-ribose] polymerase 4 (EC 2.4.2.30) (PARP-4) (Vault poly(ADP-, ribose) polymerase) (VPARP) (193 kDa vault protein) (PARP-, related/lalpha-related H5/proline-rich) (PH5P).]                                            | Nuclear          |
| Q9UL17 | [T-box transcription factor TBX21 (T-box protein 21) (Transcription, factor TBLYM) (T-cell-specific T-box transcription factor T-bet).]                                                                                          | Nuclear          |
| Q9UL58 | [Zinc finger protein 215 (BWSCR2-associated zinc finger protein 2) (BAZ, 2) (Zinc finger protein with KRAB and SCAN domains 11).]                                                                                                | Nuclear          |
| Q9UNX4 | WD repeat-containing protein 3.                                                                                                                                                                                                  | Nuclear          |
| Q9Y2G3 | [Probable phospholipid-transporting ATPase IF (EC 3.6.3.1) (ATPase, class I type 11B) (ATPase IR).]                                                                                                                              | Nuclear          |
| Q9Y2X3 | Nucleolar protein 5 (Nucleolar protein NOP5) (NOP58).                                                                                                                                                                            | Nuclear          |
| O00505 | Importin subunit alpha-3 (Karyopherin subunit alpha-3) (SRP1-gamma).                                                                                                                                                             | Nuclear Membrane |
| P57740 | [Nuclear pore complex protein Nup107 (Nucleoporin Nup107) (107 kDa, nucleoporin).]                                                                                                                                               | Nuclear Membrane |
| Q12769 | [Nuclear pore complex protein Nup160 (Nucleoporin Nup160) (160 kDa, nucleoporin).]                                                                                                                                               | Nuclear Membrane |
| Q9BTX1 | Nucleoporin NDC1 (hNDC1) (Transmembrane protein 48).                                                                                                                                                                             | Nuclear Membrane |
| Q9H2T7 | Ran-binding protein 17.                                                                                                                                                                                                          | Nuclear Membrane |
| P49792 | [E3 SUMO-protein ligase RanBP2 (Ran-binding protein 2) (Nuclear pore, complex protein Nup358) (Nucleoporin Nup358) (358 kDa nucleoporin), (p270).]                                                                               | Nuclear Membrane |
| P37802 | Transgelin-2 (SM22-alpha homolog).                                                                                                                                                                                               | Nuclear Membrane |

|        |                                                                                                                                                                                                                                                                                                                      |                          |
|--------|----------------------------------------------------------------------------------------------------------------------------------------------------------------------------------------------------------------------------------------------------------------------------------------------------------------------|--------------------------|
| P63165 | [Small ubiquitin-related modifier 1 precursor (SUMO-1) (Sentrin), (Ubiquitin-like protein SMT3C) (SMT3 homolog 3) (Ubiquitin-homology, domain protein PIC1) (Ubiquitin-like protein UBL1) (GAP-modifying, protein 1) (GMP1).]                                                                                        | Nuclear Membrane         |
| P52594 | [Nucleoporin-like protein RIP (HIV-1 Rev-binding protein) (Rev-, interacting protein) (Rev/Rex activation domain-binding protein).]                                                                                                                                                                                  | Nuclear Membrane         |
| P52948 | [Nuclear pore complex protein Nup98-Nup96 precursor [Contains: Nuclear, pore complex protein Nup98 (Nucleoporin Nup98) (98 kDa nucleoporin);, Nuclear pore complex protein Nup96 (Nucleoporin Nup96) (96 kDa, nucleoporin)].]                                                                                        | Nuclear Membrane         |
| O15182 | Centrin-3.                                                                                                                                                                                                                                                                                                           | Other Filament or Tubule |
| O43182 | [Rho GTPase-activating protein 6 (Rho-type GTPase-activating protein, RhoGAPX-1).]                                                                                                                                                                                                                                   | Other Filament or Tubule |
| O43303 | Centrosomal protein of 110 kDa (Cep110 protein).                                                                                                                                                                                                                                                                     | Other Filament or Tubule |
| O43903 | Growth arrest-specific protein 2 (GAS-2).                                                                                                                                                                                                                                                                            | Other Filament or Tubule |
| P08729 | [Keratin, type II cytoskeletal 7 (Cytokeratin-7) (CK-7) (Keratin-7), (K7) (Sarcolectin).]                                                                                                                                                                                                                            | Other Filament or Tubule |
| P08779 | [Keratin, type I cytoskeletal 16 (Cytokeratin-16) (CK-16) (Keratin-16), (K16).]                                                                                                                                                                                                                                      | Other Filament or Tubule |
| P13647 | [Keratin, type II cytoskeletal 5 (Cytokeratin-5) (CK-5) (Keratin-5), (K5) (58 kDa cytokeratin).]                                                                                                                                                                                                                     | Other Filament or Tubule |
| P14136 | Glial fibrillary acidic protein (GFAP).                                                                                                                                                                                                                                                                              | Other Filament or Tubule |
| P17661 | Desmin.                                                                                                                                                                                                                                                                                                              | Other Filament or Tubule |
| P19012 | [Keratin, type I cytoskeletal 15 (Cytokeratin-15) (CK-15) (Keratin-15), (K15).]                                                                                                                                                                                                                                      | Other Filament or Tubule |
| P46940 | Ras GTPase-activating-like protein IQGAP1 (p195).                                                                                                                                                                                                                                                                    | Other Filament or Tubule |
| P48681 | Nestin.                                                                                                                                                                                                                                                                                                              | Other Filament or Tubule |
| Q14008 | [Cytoskeleton-associated protein 5 (Colonic and hepatic tumor over-, expressed protein) (Ch-TOG protein).]                                                                                                                                                                                                           | Other Filament or Tubule |
| P02533 | [Keratin, type I cytoskeletal 14 (Cytokeratin-14) (CK-14) (Keratin-14), (K14).]                                                                                                                                                                                                                                      | Other Filament or Tubule |
| P05787 | [Keratin, type II cytoskeletal 8 (Cytokeratin-8) (CK-8) (Keratin-8), (K8).]                                                                                                                                                                                                                                          | Other Filament or Tubule |
| P40121 | Macrophage-capping protein (Actin regulatory protein CAP-G).                                                                                                                                                                                                                                                         | Other Filament or Tubule |
| P41219 | Peripherin.                                                                                                                                                                                                                                                                                                          | Other Filament or Tubule |
| Q04695 | [Keratin, type I cytoskeletal 17 (Cytokeratin-17) (CK-17) (Keratin-17), (K17) (39.1).]                                                                                                                                                                                                                               | Other Filament or Tubule |
| Q99996 | [A-kinase anchor protein 9 (Protein kinase A-anchoring protein 9), (PRKA9) (A-kinase anchor protein 450 kDa) (AKAP 450) (A-kinase anchor, protein 350 kDa) (AKAP 350) (hgAKAP 350) (AKAP 120-like protein), (Protein hyperion) (Protein yotiao) (Centrosome- and Golgi-localized, PKN-associated protein) (CG-NAP).] | Other Filament or Tubule |
| P13645 | [Keratin, type I cytoskeletal 10 (Cytokeratin-10) (CK-10) (Keratin-10), (K10).]                                                                                                                                                                                                                                      | Other Filament or Tubule |
| P19013 | [Keratin, type II cytoskeletal 4 (Cytokeratin-4) (CK-4) (Keratin-4), (K4).]                                                                                                                                                                                                                                          | Other Filament or Tubule |
| Q13515 | [Phakinin (Beaded filament structural protein 2) (Lens fiber cell, beaded filament protein CP 49) (CP49) (49 kDa cytoskeletal protein), (CP 47) (CP47) (Lens intermediate filament-like light) (LIFL-L).]                                                                                                            | Other Filament or Tubule |
| P04264 | [Keratin, type II cytoskeletal 1 (Cytokeratin-1) (CK-1) (Keratin-1), (K1) (67 kDa cytokeratin) (Hair alpha protein).]                                                                                                                                                                                                | Other Filament or Tubule |
| P30260 | Cell division cycle protein 27 homolog (CDC27Hs) (H-NUC).                                                                                                                                                                                                                                                            | Other Filament or Tubule |
| P35609 | [Alpha-actinin-2 (Alpha-actinin skeletal muscle isoform 2) (F-actin, cross-linking protein).]                                                                                                                                                                                                                        | Other Filament or Tubule |
| P68133 | Actin, alpha skeletal muscle (Alpha-actin-1).                                                                                                                                                                                                                                                                        | Other Filament or Tubule |
| O15392 | [Baculoviral IAP repeat-containing protein 5 (Apoptosis inhibitor, survivin) (Apoptosis inhibitor 4).]                                                                                                                                                                                                               | Other Filament or Tubule |
| P12035 | [Keratin, type II cytoskeletal 3 (Cytokeratin-3) (CK-3) (Keratin-3), (K3) (65 kDa cytokeratin).]                                                                                                                                                                                                                     | Other Filament or Tubule |
| P15311 | Ezrin (p81) (Cytovillin) (Villin-2).                                                                                                                                                                                                                                                                                 | Other Filament or Tubule |
| P20700 | Lamin-B1.                                                                                                                                                                                                                                                                                                            | Other Filament or Tubule |

|        |                                                                                                                                                                                                                                                     |                          |
|--------|-----------------------------------------------------------------------------------------------------------------------------------------------------------------------------------------------------------------------------------------------------|--------------------------|
| P47756 | F-actin-capping protein subunit beta (CapZ beta).                                                                                                                                                                                                   | Other Filament or Tubule |
| P52179 | [Myomesin-1 (190 kDa titin-associated protein) (190 kDa connectin-, associated protein).]                                                                                                                                                           | Other Filament or Tubule |
| P06753 | Tropomyosin alpha-3 chain (Tropomyosin-3) (Tropomyosin gamma) (hTM5).                                                                                                                                                                               | Other Filament or Tubule |
| P23258 | [Tubulin gamma-1 chain (Gamma-1-tubulin) (Gamma-tubulin complex, component 1) (GCP-1).]                                                                                                                                                             | Other Filament or Tubule |
| P41208 | Centrin-2 (Caltractin isoform 1).                                                                                                                                                                                                                   | Other Filament or Tubule |
| Q01546 | [Keratin, type II cytoskeletal 2 oral (Cytokeratin-2P) (K2P) (CK 2P), (Keratin-76).]                                                                                                                                                                | Other Filament or Tubule |
| Q08043 | [Alpha-actinin-3 (Alpha-actinin skeletal muscle isoform 3) (F-actin, cross-linking protein).]                                                                                                                                                       | Other Filament or Tubule |
| Q9UJT1 | Tubulin delta chain (Delta-tubulin).                                                                                                                                                                                                                | Other Filament or Tubule |
| O00213 | [Amyloid beta A4 precursor protein-binding family B member 1 (Fe65, protein).]                                                                                                                                                                      | Other Go Component       |
| O43684 | Mitotic checkpoint protein BUB3.                                                                                                                                                                                                                    | Other Go Component       |
| O60240 | Perilipin (PER1) (Lipid droplet-associated protein).                                                                                                                                                                                                | Other Go Component       |
| O60508 | [Pre-mRNA-processing factor 17 (PRP17 homolog) (hPRP17) (Cell division, cycle 40 homolog) (EH-binding protein 3) (Ehb3).]                                                                                                                           | Other Go Component       |
| P08575 | [Leukocyte common antigen precursor (EC 3.1.3.48) (L-CA) (T200) (CD45, antigen).]                                                                                                                                                                   | Other Go Component       |
| P08621 | [U1 small nuclear ribonucleoprotein 70 kDa (U1 snRNP 70 kDa) (snRNP70), (U1-70K).]                                                                                                                                                                  | Other Go Component       |
| P09012 | [U1 small nuclear ribonucleoprotein A (U1 snRNP protein A) (U1A, protein) (U1-A).]                                                                                                                                                                  | Other Go Component       |
| P10144 | [Granzyme B precursor (EC 3.4.21.79) (T-cell serine protease 1-3E), (Cytotoxic T-lymphocyte proteinase 2) (Lymphocyte protease) (SECT), (Granzyme-2) (Cathepsin G-like 1) (CTSL1) (CTLA-1) (Fragmentin-2), (Human lymphocyte protein) (HLP) (C11).] | Other Go Component       |
| P11532 | Dystrophin.                                                                                                                                                                                                                                         | Other Go Component       |
| P12109 | Collagen alpha-1(VI) chain precursor.                                                                                                                                                                                                               | Other Go Component       |
| P15088 | [Mast cell carboxypeptidase A precursor (EC 3.4.17.1) (MC-CPA), (Carboxypeptidase A3).]                                                                                                                                                             | Other Go Component       |
| P20849 | Collagen alpha-1(IX) chain precursor.                                                                                                                                                                                                               | Other Go Component       |
| P43681 | Neuronal acetylcholine receptor subunit alpha-4 precursor.                                                                                                                                                                                          | Other Go Component       |
| P51884 | [Lumican precursor (Keratan sulfate proteoglycan lumican) (KSPG, lumican).]                                                                                                                                                                         | Other Go Component       |
| Q13435 | [Splicing factor 3B subunit 2 (Spliceosome-associated protein 145) (SAP, 145) (SF3b150) (Pre-mRNA-splicing factor SF3b 145 kDa subunit).]                                                                                                           | Other Go Component       |
| Q14562 | [ATP-dependent RNA helicase DHX8 (EC 3.6.1.-) (DEAH box protein 8) (RNA, helicase HRH1).]                                                                                                                                                           | Other Go Component       |
| Q16363 | Laminin subunit alpha-4 precursor.                                                                                                                                                                                                                  | Other Go Component       |
| O75955 | Flotillin-1.                                                                                                                                                                                                                                        | Other Go Component       |
| O96017 | Serine/threonine-protein kinase Chk2 (EC 2.7.11.1) (Cds1).                                                                                                                                                                                          | Other Go Component       |
| P00441 | Superoxide dismutase [Cu-Zn] (EC 1.15.1.1).                                                                                                                                                                                                         | Other Go Component       |
| P01619 | Ig kappa chain V-III region B6.                                                                                                                                                                                                                     | Other Go Component       |
| P02461 | Collagen alpha-1(III) chain precursor.                                                                                                                                                                                                              | Other Go Component       |
| P22303 | Acetylcholinesterase precursor (EC 3.1.1.7) (AChE).                                                                                                                                                                                                 | Other Go Component       |
| P30532 | Neuronal acetylcholine receptor subunit alpha-5 precursor.                                                                                                                                                                                          | Other Go Component       |
| P32927 | [Cytokine receptor common beta chain precursor (GM-CSF/IL-3/IL-5, receptor common beta-chain) (CD131 antigen) (CDw131).]                                                                                                                            | Other Go Component       |
| P33981 | [Dual specificity protein kinase TTK (EC 2.7.12.1) (Phosphotyrosine, picked threonine-protein kinase) (PYT).]                                                                                                                                       | Other Go Component       |

|        |                                                                                                                                                                                                                                                                      |                    |
|--------|----------------------------------------------------------------------------------------------------------------------------------------------------------------------------------------------------------------------------------------------------------------------|--------------------|
| P98073 | [Enteropeptidase precursor (EC 3.4.21.9) (Enterokinase) (Serine, protease 7) [Contains: Enteropeptidase non-catalytic heavy chain;, Enteropeptidase catalytic light chain].]                                                                                         | Other Go Component |
| Q05586 | [Glutamate [NMDA] receptor subunit zeta-1 precursor (N-methyl-D-, aspartate receptor subunit NR1).]                                                                                                                                                                  | Other Go Component |
| Q10570 | [Cleavage and polyadenylation specificity factor subunit 1 (Cleavage, and polyadenylation specificity factor 160 kDa subunit) (CPSF 160 kDa, subunit).]                                                                                                              | Other Go Component |
| Q13257 | [Mitotic spindle assembly checkpoint protein MAD2A (MAD2-like 1), (HsMAD2).]                                                                                                                                                                                         | Other Go Component |
| Q99715 | Collagen alpha-1(XII) chain precursor.                                                                                                                                                                                                                               | Other Go Component |
| Q9H1Y0 | Autophagy protein 5 (APG5-like) (Apoptosis-specific protein).                                                                                                                                                                                                        | Other Go Component |
| O43143 | [Putative pre-mRNA-splicing factor ATP-dependent RNA helicase DHX15, (EC 3.6.1.-) (DEAH box protein 15) (ATP-dependent RNA helicase #46).]                                                                                                                           | Other Go Component |
| O43561 | [Linker for activation of T-cells family member 1 (36 kDa phospho-, tyrosine adapter protein) (pp36) (p36-38).]                                                                                                                                                      | Other Go Component |
| O60313 | [Dynammin-like 120 kDa protein, mitochondrial precursor (Optic atrophy, protein 1) [Contains: Dynammin-like 120 kDa protein, form S1].]                                                                                                                              | Other Go Component |
| O75643 | [U5 small nuclear ribonucleoprotein 200 kDa helicase (EC 3.6.1.-) (U5, snRNP-specific 200 kDa protein) (U5-200KD) (Activating signal, cointegrator 1 complex subunit 3-like 1) (BRR2 homolog).]                                                                      | Other Go Component |
| O75683 | Surfeit locus protein 6.                                                                                                                                                                                                                                             | Other Go Component |
| P09661 | U2 small nuclear ribonucleoprotein A' (U2 snRNP-A').                                                                                                                                                                                                                 | Other Go Component |
| P12814 | [Alpha-actinin-1 (Alpha-actinin cytoskeletal isoform) (Non-muscle, alpha-actinin-1) (F-actin cross-linking protein).]                                                                                                                                                | Other Go Component |
| P15924 | Desmoplakin (DP) (250/210 kDa paraneoplastic pemphigus antigen).                                                                                                                                                                                                     | Other Go Component |
| P18206 | Vinculin (Metavinculin).                                                                                                                                                                                                                                             | Other Go Component |
| P55268 | Laminin subunit beta-2 precursor (S-laminin) (Laminin B1s chain).                                                                                                                                                                                                    | Other Go Component |
| Q14031 | Collagen alpha-6(IV) chain precursor.                                                                                                                                                                                                                                | Other Go Component |
| Q14807 | [Kinesin-like protein KIF22 (Kinesin-like DNA-binding protein), (Kinesin-like protein 4).]                                                                                                                                                                           | Other Go Component |
| Q15696 | [U2 small nuclear ribonucleoprotein auxiliary factor 35 kDa subunit-, related protein 2 (U2(RNU2) small nuclear RNA auxiliary factor 1-like, 2) (CCCH type zinc finger, RNA-binding motif and serine/arginine rich, protein 2) (Renal carcinoma antigen NY-REN-20).] | Other Go Component |
| Q15942 | Zyxin (Zyxin-2).                                                                                                                                                                                                                                                     | Other Go Component |
| Q7RTV0 | [PHD finger-like domain-containing protein 5A (PHD finger-like domain, protein 5A) (Splicing factor 3B-associated 14 kDa protein) (SF3b14b).]                                                                                                                        | Other Go Component |
| Q92817 | [Envoplakin (210 kDa paraneoplastic pemphigus antigen) (p210) (210 kDa, cornified envelope precursor protein).]                                                                                                                                                      | Other Go Component |
| P01157 | Growth-modulating peptide.                                                                                                                                                                                                                                           | Other Go Component |
| P04083 | [Annexin A1 (Annexin-1) (Annexin I) (Lipocortin I) (Calpactin II), (Chromobindin-9) (p35) (Phospholipase A2 inhibitory protein).]                                                                                                                                    | Other Go Component |
| P05198 | [Eukaryotic translation initiation factor 2 subunit 1 (Eukaryotic, translation initiation factor 2 subunit alpha) (eIF-2-alpha) (EIF-, 2alpha) (EIF-2A).]                                                                                                            | Other Go Component |
| P05997 | Collagen alpha-2(V) chain precursor.                                                                                                                                                                                                                                 | Other Go Component |
| P22735 | [Protein-glutamine gamma-glutamyltransferase K (EC 2.3.2.13), (Transglutaminase K) (TGase K) (TGK) (TG(K)) (Transglutaminase-1), (Epidermal TGase).]                                                                                                                 | Other Go Component |
| P29400 | Collagen alpha-5(IV) chain precursor.                                                                                                                                                                                                                                | Other Go Component |
| P35663 | Cylicin-1 (Cylicin I) (Multiple-band polypeptide I).                                                                                                                                                                                                                 | Other Go Component |
| P39059 | [Collagen alpha-1(XV) chain precursor [Contains: Endostatin, (Endostatin-XV) (Restin) (Related to endostatin)].]                                                                                                                                                     | Other Go Component |

|        |                                                                                                                                                                                                                                                                |                    |
|--------|----------------------------------------------------------------------------------------------------------------------------------------------------------------------------------------------------------------------------------------------------------------|--------------------|
| P63279 | [SUMO-conjugating enzyme UBC9 (EC 6.3.2.-) (SUMO-protein ligase), (Ubiquitin-conjugating enzyme E2 I) (Ubiquitin-protein ligase I), (Ubiquitin carrier protein I) (Ubiquitin carrier protein 9) (p18).]                                                        | Other Go Component |
| P82932 | Mitochondrial 28S ribosomal protein S6 (S6mt) (MRP-S6).                                                                                                                                                                                                        | Other Go Component |
| P98082 | Disabled homolog 2 (Differentially-expressed protein 2) (DOC-2).                                                                                                                                                                                               | Other Go Component |
| Q01955 | [Collagen alpha-3(IV) chain precursor (Goodpasture antigen) [Contains:, Tumstatin].]                                                                                                                                                                           | Other Go Component |
| Q07001 | Acetylcholine receptor subunit delta precursor.                                                                                                                                                                                                                | Other Go Component |
| Q07092 | Collagen alpha-1(XVI) chain precursor.                                                                                                                                                                                                                         | Other Go Component |
| Q9NZU7 | Calcium-binding protein 1 (CaBP1) (Calbrain).                                                                                                                                                                                                                  | Other Go Component |
| Q9UJT0 | Tubulin epsilon chain (Epsilon-tubulin).                                                                                                                                                                                                                       | Other Go Component |
| Q9Y217 | [FYVE finger-containing phosphoinositide kinase (EC 2.7.1.68) (1-, phosphatidylinositol-4-phosphate 5-kinase) (Phosphatidylinositol-3-, phosphate 5-kinase type III) (PIP5K) (PtdIns(4)P-5-kinase) (PIKfyve), (p235).]                                         | Other Go Component |
| O00255 | Menin.                                                                                                                                                                                                                                                         | Other Go Component |
| O43683 | [Mitotic checkpoint serine/threonine-protein kinase BUB1 (EC 2.7.11.1), (hBUB1) (BUB1A).]                                                                                                                                                                      | Other Go Component |
| O75533 | [Splicing factor 3B subunit 1 (Spliceosome-associated protein 155) (SAP, 155) (SF3b155) (Pre-mRNA-splicing factor SF3b 155 kDa subunit).]                                                                                                                      | Other Go Component |
| P08572 | Collagen alpha-2(IV) chain precursor [Contains: Canstatin].                                                                                                                                                                                                    | Other Go Component |
| P12107 | Collagen alpha-1(XI) chain precursor.                                                                                                                                                                                                                          | Other Go Component |
| P12111 | Collagen alpha-3(VI) chain precursor.                                                                                                                                                                                                                          | Other Go Component |
| P13942 | Collagen alpha-2(XI) chain precursor.                                                                                                                                                                                                                          | Other Go Component |
| P19021 | [Peptidyl-glycine alpha-amidating monooxygenase precursor (PAM), [Includes: Peptidylglycine alpha-hydroxylating monooxygenase, (EC 1.14.17.3) (PHM); Peptidyl-alpha-hydroxyglycine alpha-amidating, lyase (EC 4.3.2.5) (Peptidylamidoglycolate lyase) (PAL)].] | Other Go Component |
| P20908 | Collagen alpha-1(V) chain precursor.                                                                                                                                                                                                                           | Other Go Component |
| P42566 | [Epidermal growth factor receptor substrate 15 (Protein Eps15) (AF-1p, protein).]                                                                                                                                                                              | Other Go Component |
| P53420 | Collagen alpha-4(IV) chain precursor.                                                                                                                                                                                                                          | Other Go Component |
| P55344 | Lens fiber membrane intrinsic protein (MP18) (MP19) (MP20).                                                                                                                                                                                                    | Other Go Component |
| P56856 | Claudin-18.                                                                                                                                                                                                                                                    | Other Go Component |
| Q13946 | [High affinity cAMP-specific 3',5'-cyclic phosphodiesterase 7A, (EC 3.1.4.17) (HCP1) (TM22).]                                                                                                                                                                  | Other Go Component |
| Q14993 | Collagen alpha-1(XIX) chain precursor (Collagen alpha-1(Y) chain).                                                                                                                                                                                             | Other Go Component |
| Q15459 | [Splicing factor 3 subunit 1 (Spliceosome-associated protein 114) (SAP, 114) (SF3a120).]                                                                                                                                                                       | Other Go Component |
| Q16643 | Drebrin (Developmentally-regulated brain protein).                                                                                                                                                                                                             | Other Go Component |
| P01303 | [Neuropeptide Y precursor [Contains: Neuropeptide Y (Neuropeptide, tyrosine) (NPY); C-flanking peptide of NPY (CPON)].]                                                                                                                                        | Other Go Component |
| P02549 | Spectrin alpha chain, erythrocyte (Erythroid alpha-spectrin).                                                                                                                                                                                                  | Other Go Component |
| P05408 | [Neuroendocrine protein 7B2 precursor (Secretogranin-5) (Secretogranin, V) (Secretory granule endocrine protein I) (Pituitary polypeptide), [Contains: N-terminal peptide; C-terminal peptide].]                                                               | Other Go Component |
| P23497 | [Nuclear autoantigen Sp-100 (Speckled 100 kDa) (Nuclear dot-associated, Sp100 protein) (Lysp100b).]                                                                                                                                                            | Other Go Component |
| P24534 | Elongation factor 1-beta (EF-1-beta).                                                                                                                                                                                                                          | Other Go Component |
| P27658 | Collagen alpha-1(VIII) chain precursor (Endothelial collagen).                                                                                                                                                                                                 | Other Go Component |



|        |                                                                                                                                                                                                                     |                    |
|--------|---------------------------------------------------------------------------------------------------------------------------------------------------------------------------------------------------------------------|--------------------|
| P36544 | Neuronal acetylcholine receptor subunit alpha-7 precursor.                                                                                                                                                          | Other Go Component |
| P39060 | Collagen alpha-1(XVIII) chain precursor [Contains: Endostatin].                                                                                                                                                     | Other Go Component |
| P40429 | 60S ribosomal protein L13a (23 kDa highly basic protein).                                                                                                                                                           | Other Go Component |
| P60662 | [Myosin light polypeptide 6 (Smooth muscle and nonmuscle myosin light, chain alkali 6) (Myosin light chain alkali 3) (Myosin light chain 3), (MLC-3) (LC17).]                                                       | Other Go Component |
| P78369 | Claudin-10 (OSP-like protein).                                                                                                                                                                                      | Other Go Component |
| P98088 | [Mucin-5AC (Mucin-5 subtype AC, tracheobronchial) (Tracheobronchial, mucin) (TBM) (Major airway glycoprotein) (Fragment).]                                                                                          | Other Go Component |
| Q00610 | Clathrin heavy chain 1 (CLH-17).                                                                                                                                                                                    | Other Go Component |
| Q02413 | [Desmoglein-1 precursor (Desmosomal glycoprotein 1) (DG1) (DGI), (Pemphigus foliaceus antigen).]                                                                                                                    | Other Go Component |
| Q03188 | [Centromere protein C 1 (CENP-C) (Centromere autoantigen C) (Interphase, centromere complex protein 7).]                                                                                                            | Other Go Component |
| Q03692 | Collagen alpha-1(X) chain precursor.                                                                                                                                                                                | Other Go Component |
| Q05901 | Neuronal acetylcholine receptor subunit beta-3 precursor.                                                                                                                                                           | Other Go Component |
| Q9UI46 | [Dynein intermediate chain 1, axonemal (Axonemal dynein intermediate, chain 1).]                                                                                                                                    | Other Go Component |
| P51811 | [Membrane transport protein XK (Kx antigen) (Kell complex 37 kDa, component) (XK-related protein 1).]                                                                                                               | Other Membrane     |
| O00341 | [Excitatory amino acid transporter 5 (Solute carrier family 1 member 7), (Retinal glutamate transporter).]                                                                                                          | Other Membrane     |
| O00451 | [GDNF family receptor alpha-2 precursor (GFR-alpha-2) (Neurturin, receptor alpha) (NTNR-alpha) (NRTNR-alpha) (TGF-beta-related, neurotrophic factor receptor 2) (GDNF receptor beta) (GDNFR-beta) (RET, ligand 2).] | Other Membrane     |
| O00559 | [Receptor-binding cancer antigen expressed on SiSo cells (Cancer-, associated surface antigen RCAS1) (Estrogen receptor-binding fragment-, associated gene 9 protein).]                                             | Other Membrane     |
| O15165 | Uncharacterized protein C18orf1.                                                                                                                                                                                    | Other Membrane     |
| O15439 | [Multidrug resistance-associated protein 4 (ATP-binding cassette sub-, family C member 4) (MRP/cMOAT-related ABC transporter) (Multi-specific, organic anion transporter-B) (MOAT-B).]                              | Other Membrane     |
| O15482 | Testis-specific protein TEX28.                                                                                                                                                                                      | Other Membrane     |
| O43462 | [Membrane-bound transcription factor site-2 protease (EC 3.4.24.85), (S2P endopeptidase) (Site-2 protease) (Sterol regulatory element-, binding proteins intramembrane protease).]                                  | Other Membrane     |
| O60312 | [Probable phospholipid-transporting ATPase VA (EC 3.6.3.1) (ATPVA), (Aminophospholipid translocase VA).]                                                                                                            | Other Membrane     |
| O60840 | [Voltage-dependent L-type calcium channel subunit alpha-1F (Voltage-, gated calcium channel subunit alpha Cav1.4).]                                                                                                 | Other Membrane     |
| P10643 | Complement component C7 precursor.                                                                                                                                                                                  | Other Membrane     |
| P10696 | [Alkaline phosphatase, placental-like precursor (EC 3.1.3.1) (Alkaline, phosphatase Nagao isozyme) (Germ cell alkaline phosphatase) (GCAP), (PLAP-like) (ALP-1).]                                                   | Other Membrane     |
| P13761 | [HLA class II histocompatibility antigen, DRB1-7 beta chain precursor, (MHC class I antigen DRB1*7) (DR-7) (DR7).]                                                                                                  | Other Membrane     |
| P46531 | [Neurogenic locus notch homolog protein 1 precursor (Notch 1) (hN1), (Translocation-associated notch protein TAN-1) [Contains: Notch 1, extracellular truncation; Notch 1 intracellular domain].]                   | Other Membrane     |
| P48029 | [Sodium- and chloride-dependent creatine transporter 1 (CT1) (Creatine, transporter 1) (Solute carrier family 6 member 8).]                                                                                         | Other Membrane     |
| P50542 | [Peroxisomal targeting signal 1 receptor (Peroxisome receptor 1), (Peroxisomal C-terminal targeting signal import receptor) (PTS1-BP), (Peroxin-5) (PTS1 receptor).]                                                | Other Membrane     |
| P54756 | [Ephrin type-A receptor 5 precursor (EC 2.7.10.1) (Tyrosine-protein, kinase receptor EHK-1) (EPH homology kinase 1) (Receptor protein-, tyrosine kinase HEK7).]                                                     | Other Membrane     |

|        |                                                                                                                                                                                                                                                                                                              |                |
|--------|--------------------------------------------------------------------------------------------------------------------------------------------------------------------------------------------------------------------------------------------------------------------------------------------------------------|----------------|
| P56377 | [AP-1 complex subunit sigma-2 (Adapter-related protein complex 1 sigma-, 1B subunit) (Sigma-adaptin 1B) (Adaptor protein complex AP-1 sigma-1B, subunit) (Golgi adaptor HA1/AP1 adaptin sigma-1B subunit) (Clathrin, assembly protein complex 1 sigma-1B small chain) (Sigma 1B subunit of, AP-1 clathrin).] | Other Membrane |
| Q14330 | [N-arachidonyl glycine receptor (NAGly receptor) (G-protein coupled, receptor 18).]                                                                                                                                                                                                                          | Other Membrane |
| Q14940 | [Sodium/hydrogen exchanger 5 (Na(+)/H(+) exchanger 5) (NHE-5) (Solute, carrier family 9 member 5).]                                                                                                                                                                                                          | Other Membrane |
| Q15286 | Ras-related protein Rab-35 (Rab-1C) (GTP-binding protein RAY).                                                                                                                                                                                                                                               | Other Membrane |
| Q15391 | [P2Y purinoceptor 14 (P2Y14) (UDP-glucose receptor) (G-protein coupled, receptor 105).]                                                                                                                                                                                                                      | Other Membrane |
| Q15849 | Urea transporter, kidney.                                                                                                                                                                                                                                                                                    | Other Membrane |
| Q16478 | [Glutamate receptor, ionotropic kainate 5 precursor (Glutamate receptor, KA-2) (KA2) (Excitatory amino acid receptor 2) (EAA2).]                                                                                                                                                                             | Other Membrane |
| Q16787 | [Laminin subunit alpha-3 precursor (Epiligrin 170 kDa subunit) (E170), (Nicein subunit alpha).]                                                                                                                                                                                                              | Other Membrane |
| Q16864 | [Vacuolar ATP synthase subunit F (EC 3.6.3.14) (V-ATPase subunit F), (Vacuolar proton pump subunit F) (V-ATPase 14 kDa subunit).]                                                                                                                                                                            | Other Membrane |
| Q6UWL6 | [Kin of IRRE-like protein 2 precursor (Kin of irregular chiasm-like, protein 2) (Nephrin-like protein 3).]                                                                                                                                                                                                   | Other Membrane |
| P01860 | Ig gamma-3 chain C region (Heavy chain disease protein) (HDC).                                                                                                                                                                                                                                               | Other Membrane |
| P03989 | [HLA class I histocompatibility antigen, B-27 alpha chain precursor, (MHC class I antigen B*27).]                                                                                                                                                                                                            | Other Membrane |
| P04233 | [HLA class II histocompatibility antigen gamma chain (HLA-DR antigens-, associated invariant chain) (Ia antigen-associated invariant chain), (Ii) (p33) (CD74 antigen).]                                                                                                                                     | Other Membrane |
| P04920 | [Anion exchange protein 2 (Non-erythroid band 3-like protein) (AE2, anion exchanger) (Solute carrier family 4 member 2) (BND3L).]                                                                                                                                                                            | Other Membrane |
| P07358 | [Complement component C8 beta chain precursor (Complement component 8, subunit beta).]                                                                                                                                                                                                                       | Other Membrane |
| P22748 | [Carbonic anhydrase 4 precursor (EC 4.2.1.1) (Carbonic anhydrase IV), (Carbonate dehydratase IV) (CA-IV).]                                                                                                                                                                                                   | Other Membrane |
| P25067 | Collagen alpha-2(VIII) chain precursor (Endothelial collagen).                                                                                                                                                                                                                                               | Other Membrane |
| P26992 | Ciliary neurotrophic factor receptor alpha precursor (CNTFR alpha).                                                                                                                                                                                                                                          | Other Membrane |
| P31995 | [Low affinity immunoglobulin gamma Fc region receptor II-c precursor, (Fc-gamma RII-c) (FcRII-c) (IgG Fc receptor II-c) (Fc-gamma-RIIc), (CD32 antigen) (CDw32).]                                                                                                                                            | Other Membrane |
| P35410 | Mas-related G-protein coupled receptor MRG (MAS-R) (MAS1-like).                                                                                                                                                                                                                                              | Other Membrane |
| P60763 | Ras-related C3 botulinum toxin substrate 3 precursor (p21-Rac3).                                                                                                                                                                                                                                             | Other Membrane |
| Q00973 | [Beta-1,4 N-acetylgalactosaminyltransferase 1 (EC 2.4.1.92) ((N-, acetylneuraminyl)-galactosylglucosylceramide) (GM2/GD2 synthase), (GalNAc-T).]                                                                                                                                                             | Other Membrane |
| Q13061 | Triadin.                                                                                                                                                                                                                                                                                                     | Other Membrane |
| Q99848 | [Probable rRNA-processing protein EBP2 (EBNA1-binding protein 2), (Nucleolar protein p40).]                                                                                                                                                                                                                  | Other Membrane |
| Q9GZZ6 | [Neuronal acetylcholine receptor subunit alpha-10 precursor (Nicotinic, acetylcholine receptor subunit alpha 10) (NACHR alpha 10).]                                                                                                                                                                          | Other Membrane |
| Q9NRS4 | [Transmembrane protease, serine 4 (EC 3.4.21.-) (Membrane-type serine, protease 2) (MT-SP2).]                                                                                                                                                                                                                | Other Membrane |
| Q9NZW5 | MAGUK p55 subfamily member 6 (Veli-associated MAGUK 1) (VAM-1).                                                                                                                                                                                                                                              | Other Membrane |
| O00623 | [Peroxisome assembly protein 12 (Peroxin-12) (Peroxisome assembly, factor 3) (PAF-3).]                                                                                                                                                                                                                       | Other Membrane |
| O15259 | Nephrocystin-1 (Juvenile nephronophthisis 1 protein).                                                                                                                                                                                                                                                        | Other Membrane |
| O15394 | Neural cell adhesion molecule 2 precursor (N-CAM 2).                                                                                                                                                                                                                                                         | Other Membrane |
| O43427 | [Acidic fibroblast growth factor intracellular-binding protein (aFGF, intracellular-binding protein) (FGF-1 intracellular-binding protein).]                                                                                                                                                                 | Other Membrane |

|        |                                                                                                                                                                                                                                                         |                |
|--------|---------------------------------------------------------------------------------------------------------------------------------------------------------------------------------------------------------------------------------------------------------|----------------|
| O60241 | Brain-specific angiogenesis inhibitor 2 precursor.                                                                                                                                                                                                      | Other Membrane |
| O60779 | [Thiamine transporter 1 (ThTr-1) (ThTr1) (Thiamine carrier 1) (TC1), (Solute carrier family 19 member 2).]                                                                                                                                              | Other Membrane |
| O75144 | [ICOS ligand precursor (B7 homolog 2) (B7-H2) (B7-like protein Gl50), (B7-related protein 1) (B7RP-1) (CD275 antigen).]                                                                                                                                 | Other Membrane |
| P08240 | [Signal recognition particle receptor subunit alpha (SR-alpha) (Docking, protein alpha) (DP-alpha).]                                                                                                                                                    | Other Membrane |
| P08922 | [Proto-oncogene tyrosine-protein kinase ROS precursor (EC 2.7.10.1) (c-, ros-1).]                                                                                                                                                                       | Other Membrane |
| P12830 | [Epithelial cadherin precursor (E-cadherin) (Uvomorulin) (Cadherin-1), (CAM 120/80) (CD324 antigen) [Contains: E-Cad/CTF1; E-Cad/CTF2; E-, Cad/CTF3].]                                                                                                  | Other Membrane |
| P13591 | [Neural cell adhesion molecule 1, 140 kDa isoform precursor (N-CAM 140), (NCAM-140) (CD56 antigen).]                                                                                                                                                    | Other Membrane |
| P21217 | [Galactoside 3(4)-L-fucosyltransferase (EC 2.4.1.65) (Blood group Lewis, alpha-4-fucosyltransferase) (Lewis FT) (Fucosyltransferase 3) (FucT-, III).]                                                                                                   | Other Membrane |
| P42081 | [T-lymphocyte activation antigen CD86 precursor (Activation B7-2, antigen) (CTLA-4 counter-receptor B7.2) (B70) (FUN-1) (BU63).]                                                                                                                        | Other Membrane |
| P43003 | [Excitatory amino acid transporter 1 (Solute carrier family 1 member 3), (Sodium-dependent glutamate/aspartate transporter 1) (GLAST-1).]                                                                                                               | Other Membrane |
| P43220 | [Glucagon-like peptide 1 receptor precursor (GLP-1 receptor) (GLP-1-R), (GLP-1R).]                                                                                                                                                                      | Other Membrane |
| P43631 | [Killer cell immunoglobulin-like receptor 2DS2 precursor (MHC class I, NK cell receptor) (Natural killer-associated transcript 5) (NKAT-5), (p58 natural killer cell receptor clone CL-49) (p58 NK receptor) (NK, receptor 183 Act1) (CD158j antigen).] | Other Membrane |
| P48065 | [Sodium- and chloride-dependent betaine transporter (Na(+)/Cl(-), betaine/GABA transporter) (BGT-1).]                                                                                                                                                   | Other Membrane |
| P51805 | Plexin-A3 precursor (Plexin-4) (Semaphorin receptor SEX).                                                                                                                                                                                               | Other Membrane |
| P51843 | [Nuclear receptor 0B1 (Nuclear receptor DAX-1) (DSS-AHC critical region, on the X chromosome protein 1).]                                                                                                                                               | Other Membrane |
| P53985 | [Monocarboxylate transporter 1 (MCT 1) (Solute carrier family 16 member, 1).]                                                                                                                                                                           | Other Membrane |
| P54829 | [Tyrosine-protein phosphatase non-receptor type 5 (EC 3.1.3.48), (Protein-tyrosine phosphatase striatum-enriched) (STEP) (Neural-, specific protein-tyrosine phosphatase).]                                                                             | Other Membrane |
| P56159 | [GDNF family receptor alpha-1 precursor (GFR-alpha-1) (GDNF receptor, alpha) (GDNFR-alpha) (TGF-beta-related neurotrophic factor receptor 1), (RET ligand 1).]                                                                                          | Other Membrane |
| Q13505 | Metaxin-1.                                                                                                                                                                                                                                              | Other Membrane |
| Q13795 | [ADP-ribosylation factor-related protein 1 (ARF-related protein 1), (ARP).]                                                                                                                                                                             | Other Membrane |
| Q14210 | Lymphocyte antigen 6D precursor (Ly-6D) (E48 antigen).                                                                                                                                                                                                  | Other Membrane |
| Q15491 | Neuregulin-1, sensory and motor neuron-derived factor isoform.                                                                                                                                                                                          | Other Membrane |
| Q16739 | [Ceramide glucosyltransferase (EC 2.4.1.80) (Glucosylceramide synthase), (GCS) (UDP-glucose:N-acylsphingosine D-glucosyltransferase) (UDP-glucose ceramide glucosyltransferase) (GLCT-1).]                                                              | Other Membrane |
| Q92911 | [Sodium/iodide cotransporter (Na(+)/I(-) cotransporter) (Sodium-iodide, symporter) (Na(+)/I(-)-symporter).]                                                                                                                                             | Other Membrane |
| Q92968 | Peroxisomal membrane protein PEX13 (Peroxin-13).                                                                                                                                                                                                        | Other Membrane |
| O76024 | Wolframin.                                                                                                                                                                                                                                              | Other Membrane |
| P01857 | Ig gamma-1 chain C region.                                                                                                                                                                                                                              | Other Membrane |
| P01861 | Ig gamma-4 chain C region.                                                                                                                                                                                                                              | Other Membrane |
| P01919 | [HLA class II histocompatibility antigen, DQ(W1.1) beta chain precursor, (DQB1*0501).]                                                                                                                                                                  | Other Membrane |

|        |                                                                                                                                                                                                                                                                                                                  |                |
|--------|------------------------------------------------------------------------------------------------------------------------------------------------------------------------------------------------------------------------------------------------------------------------------------------------------------------|----------------|
| P22413 | [Ectonucleotide pyrophosphatase/phosphodiesterase family member 1 (E-, NPP 1) (Phosphodiesterase I/nucleotide pyrophosphatase 1) (Plasma-cell, membrane glycoprotein PC-1) [Includes: Alkaline phosphodiesterase I, (EC 3.1.4.1); Nucleotide pyrophosphatase (EC 3.6.1.9) (NPPase)].]                            | Other Membrane |
| P25089 | FMLP-related receptor II (FMLP-R-II) (Formylpeptide receptor-like 2).                                                                                                                                                                                                                                            | Other Membrane |
| P26439 | [3 beta-hydroxysteroid dehydrogenase/Delta 5-->4-isomerase type 2 (3-, beta-HSD II) [Includes: 3-beta-hydroxy-Delta(5)-steroid dehydrogenase, (EC 1.1.1.145) (3-beta-hydroxy-5-ene steroid dehydrogenase), (Progesterone reductase); Steroid Delta-isomerase (EC 5.3.3.1) (Delta-, 5-3-ketosteroid isomerase)].] | Other Membrane |
| P26442 | [Autocrine motility factor receptor precursor, isoform 1 (AMF, receptor).]                                                                                                                                                                                                                                       | Other Membrane |
| P29350 | [Tyrosine-protein phosphatase non-receptor type 6 (EC 3.1.3.48), (Protein-tyrosine phosphatase 1C) (PTP-1C) (Hematopoietic cell, protein-tyrosine phosphatase) (SH-PTP1) (Protein-tyrosine phosphatase, SHP-1).]                                                                                                 | Other Membrane |
| P29728 | [2'-5'-oligoadenylate synthetase 2 (EC 2.7.7.-) ((2-5')oligo(A), synthetase 2) (2-5A synthetase 2) (p69 OAS / p71 OAS) (p69OAS / p71OAS).]                                                                                                                                                                       | Other Membrane |
| P30533 | [Alpha-2-macroglobulin receptor-associated protein precursor (Alpha-2-, MRAP) (Low density lipoprotein receptor-related protein-associated, protein 1) (RAP).]                                                                                                                                                   | Other Membrane |
| P35555 | Fibrillin-1 precursor.                                                                                                                                                                                                                                                                                           | Other Membrane |
| P37173 | [TGF-beta receptor type-2 precursor (EC 2.7.11.30) (TGF-beta receptor, type II) (TGFR-2) (TGF-beta type II receptor) (Transforming growth, factor-beta receptor type II) (TbetaR-II).]                                                                                                                           | Other Membrane |
| P41439 | Folate receptor gamma precursor (FR-gamma) (Folate receptor 3).                                                                                                                                                                                                                                                  | Other Membrane |
| P98155 | [Very low-density lipoprotein receptor precursor (VLDL receptor) (VLDL-, R).]                                                                                                                                                                                                                                    | Other Membrane |
| Q02388 | [Collagen alpha-1(VII) chain precursor (Long-chain collagen) (LC, collagen).]                                                                                                                                                                                                                                    | Other Membrane |
| Q03001 | [Bullous pemphigoid antigen 1, isoforms 1/2/3/4/5/8 (230 kDa bullous, pemphigoid antigen) (BPA) (Hemidesmosomal plaque protein) (Dystonia, musculorum protein) (Dystonin) (Fragment).]                                                                                                                           | Other Membrane |
| Q06481 | [Amyloid-like protein 2 precursor (Amyloid protein homolog) (APPH), (CDEI box-binding protein) (CDEBP).]                                                                                                                                                                                                         | Other Membrane |
| Q08828 | [Adenylate cyclase type 1 (EC 4.6.1.1) (Adenylate cyclase type I) (ATP, pyrophosphate-lyase 1) (Adenylyl cyclase 1) (Ca(2+)/calmodulin-, activated adenylyl cyclase).]                                                                                                                                           | Other Membrane |
| Q12846 | Syntaxin-4 (Renal carcinoma antigen NY-REN-31).                                                                                                                                                                                                                                                                  | Other Membrane |
| Q93070 | [Ecto-ADP-ribosyltransferase 4 precursor (EC 2.4.2.31) (NAD(P)(+)-, arginine ADP-ribosyltransferase 4) (Mono(ADP-ribosyl)transferase 4), (Dombrock blood group carrier molecule) (CD297 antigen).]                                                                                                               | Other Membrane |
| Q99643 | [Succinate dehydrogenase cytochrome b560 subunit, mitochondrial, precursor (Integral membrane protein CII-3) (QPs1) (QPs-1) (Succinate, dehydrogenase complex subunit C) (Succinate-ubiquinone oxidoreductase, cytochrome B large subunit) (CYBL).]                                                              | Other Membrane |
| Q99717 | [Mothers against decapentaplegic homolog 5 (SMAD 5) (Mothers against, DPP homolog 5) (Smad5) (hSmad5) (JV5-1).]                                                                                                                                                                                                  | Other Membrane |
| Q9GZQ6 | [Neuropeptide FF receptor 1 (G-protein coupled receptor 147) (RFamide-, related peptide receptor OT7T022).]                                                                                                                                                                                                      | Other Membrane |
| Q9H251 | Cadherin-23 precursor (Otocadherin).                                                                                                                                                                                                                                                                             | Other Membrane |
| Q9H3N8 | [Histamine H4 receptor (HH4R) (GPRv53) (G-protein coupled receptor 105), (SP9144) (AXOR35).]                                                                                                                                                                                                                     | Other Membrane |
| Q9NRJ7 | Protocadherin beta 16 precursor (PCDH-beta16) (Protocadherin 3X).                                                                                                                                                                                                                                                | Other Membrane |
| Q9NYJ7 | Delta-like protein 3 precursor (Drosophila Delta homolog 3).                                                                                                                                                                                                                                                     | Other Membrane |
| Q9UEY8 | Gamma-adducin (Adducin-like protein 70).                                                                                                                                                                                                                                                                         | Other Membrane |
| Q9UKF2 | [ADAM 30 precursor (EC 3.4.24.-) (A disintegrin and metalloproteinase, domain 30).]                                                                                                                                                                                                                              | Other Membrane |
| Q9ULB4 | Cadherin-9 precursor.                                                                                                                                                                                                                                                                                            | Other Membrane |
| Q9Y345 | [Sodium- and chloride-dependent glycine transporter 2 (GlyT2) (GlyT-2), (Solute carrier family 6 member 5).]                                                                                                                                                                                                     | Other Membrane |

|        |                                                                                                                                                                                                                                                                                              |                |
|--------|----------------------------------------------------------------------------------------------------------------------------------------------------------------------------------------------------------------------------------------------------------------------------------------------|----------------|
| P13726 | [Tissue factor precursor (TF) (Coagulation factor III) (Thromboplastin), (CD142 antigen).]                                                                                                                                                                                                   | Other Membrane |
| O14684 | [Prostaglandin E synthase (EC 5.3.99.3) (Microsomal glutathione S-, transferase 1-like 1) (MGST1-L1) (p53-induced gene 12 protein).]                                                                                                                                                         | Other Membrane |
| O14983 | [Sarcoplasmic/endoplasmic reticulum calcium ATPase 1 (EC 3.6.3.8), (Calcium pump 1) (SERCA1) (SR Ca(2+)-ATPase 1) (Calcium-transporting, ATPase sarcoplasmic reticulum type, fast twitch skeletal muscle, isoform) (Endoplasmic reticulum class 1/2 Ca(2+) ATPase).]                         | Other Membrane |
| O43747 | [AP-1 complex subunit gamma-1 (Adapter-related protein complex 1, subunit gamma-1) (Gamma-adaptin) (Adaptor protein complex AP-1 gamma 1, subunit) (Golgi adaptor HA1/AP1 adaptin subunit gamma-1) (Clathrin, assembly protein complex 1 gamma-1 large chain).]                              | Other Membrane |
| O60242 | Brain-specific angiogenesis inhibitor 3 precursor.                                                                                                                                                                                                                                           | Other Membrane |
| O60609 | GDNF family receptor alpha-3 precursor (GFR-alpha-3).                                                                                                                                                                                                                                        | Other Membrane |
| O60683 | [Peroxisome assembly protein 10 (Peroxin-10) (Peroxisome biogenesis, factor 10) (RING finger protein 69).]                                                                                                                                                                                   | Other Membrane |
| O75311 | Glycine receptor subunit alpha-3 precursor.                                                                                                                                                                                                                                                  | Other Membrane |
| O75381 | [Peroxisomal membrane protein PEX14 (Peroxin-14) (Peroxisomal membrane, anchor protein PEX14) (PTS1 receptor docking protein).]                                                                                                                                                              | Other Membrane |
| P07911 | Uromodulin precursor (Tamm-Horsfall urinary glycoprotein) (THP).                                                                                                                                                                                                                             | Other Membrane |
| P09603 | [Macrophage colony-stimulating factor 1 precursor (CSF-1) (MCSF) (M-, CSF) (Lanimoestim) [Contains: Processed macrophage colony-stimulating, factor 1].]                                                                                                                                     | Other Membrane |
| P12821 | [Angiotensin-converting enzyme, somatic isoform precursor (EC 3.4.15.1), (Dipeptidyl carboxypeptidase I) (Kininase II) (CD143 antigen), [Contains: Angiotensin-converting enzyme, somatic isoform, soluble, form].]                                                                          | Other Membrane |
| P12956 | [ATP-dependent DNA helicase 2 subunit 1 (ATP-dependent DNA helicase II, 70 kDa subunit) (Lupus Ku autoantigen protein p70) (Ku70) (70 kDa, subunit of Ku antigen) (Thyroid-lupus autoantigen) (TLAA) (CTC box-, binding factor 75 kDa subunit) (CTCBF) (CTC75) (DNA-repair protein, XRCC6).] | Other Membrane |
| P13987 | [CD59 glycoprotein precursor (Membrane attack complex inhibition, factor) (MACIF) (MAC-inhibitory protein) (MAC-IP) (Protectin) (MEM43, antigen) (Membrane inhibitor of reactive lysis) (MIRL) (20 kDa, homologous restriction factor) (HRF-20) (HRF20) (1F5 antigen).]                      | Other Membrane |
| P19634 | [Sodium/hydrogen exchanger 1 (Na(+)/H(+) exchanger 1) (NHE-1) (Solute, carrier family 9 member 1) (Na(+)/H(+) antiporter, amiloride-, sensitive) (APNH).]                                                                                                                                    | Other Membrane |
| P20023 | [Complement receptor type 2 precursor (Cr2) (Complement C3d receptor), (Epstein-Barr virus receptor) (EBV receptor) (CD21 antigen).]                                                                                                                                                         | Other Membrane |
| P42345 | [FKBP12-rapamycin complex-associated protein (FK506-binding protein 12-, rapamycin complex-associated protein 1) (Rapamycin target protein), (RAPT1) (Mammalian target of rapamycin) (mTOR).]                                                                                                | Other Membrane |
| P42892 | Endothelin-converting enzyme 1 (EC 3.4.24.71) (ECE-1).                                                                                                                                                                                                                                       | Other Membrane |
| P48066 | Sodium- and chloride-dependent GABA transporter 3.                                                                                                                                                                                                                                           | Other Membrane |
| P48546 | [Gastric inhibitory polypeptide receptor precursor (GIP-R) (Glucose-, dependent insulinotropic polypeptide receptor).]                                                                                                                                                                       | Other Membrane |
| P48553 | [Transmembrane protein 1 (Epilepsy holoprosencephaly candidate 1, protein) (EHOC-1) (GT334 protein).]                                                                                                                                                                                        | Other Membrane |
| P51693 | Amyloid-like protein 1 precursor (APLP) (APLP-1) [Contains: C30].                                                                                                                                                                                                                            | Other Membrane |
| P51797 | Chloride channel protein 6 (ClC-6).                                                                                                                                                                                                                                                          | Other Membrane |
| P51809 | [Synaptobrevin-like protein 1 (Tetanus insensitive VAMP) (Ti-VAMP) (Ti-, VAMP/VAMP7).]                                                                                                                                                                                                       | Other Membrane |

|        |                                                                                                                                                                                                                                                                                                                                                       |                 |
|--------|-------------------------------------------------------------------------------------------------------------------------------------------------------------------------------------------------------------------------------------------------------------------------------------------------------------------------------------------------------|-----------------|
| P56180 | [Putative tyrosine-protein phosphatase TPTE (EC 3.1.3.48), (Transmembrane phosphatase with tensin homology) (Protein BJ-HCC-5), (Cancer/testis antigen 44) (CT44).]                                                                                                                                                                                   | Other Membrane  |
| Q13621 | [Solute carrier family 12 member 1 (Bumetanide-sensitive sodium-, (potassium)-chloride cotransporter 2) (Kidney-specific Na-K-Cl, symporter).]                                                                                                                                                                                                        | Other Membrane  |
| Q14112 | Nidogen-2 precursor (NID-2) (Osteonidogen).                                                                                                                                                                                                                                                                                                           | Other Membrane  |
| Q92185 | [Alpha-N-acetylneuraminide alpha-2,8-sialyltransferase (EC 2.4.99.8), (Ganglioside GD3 synthase) (Ganglioside GT3 synthase) (Alpha-2,8-, sialyltransferase 8A) (ST8Sia I).]                                                                                                                                                                           | Other Membrane  |
| O95248 | Myotubularin-related protein 5 (SET-binding factor 1) (Sbf1).                                                                                                                                                                                                                                                                                         | Other Membrane  |
| O95838 | [Glucagon-like peptide 2 receptor precursor (GLP-2 receptor) (GLP-2-R), (GLP-2R).]                                                                                                                                                                                                                                                                    | Other Membrane  |
| O95859 | [Tetraspanin-12 (Tspan-12) (Transmembrane 4 superfamily member 12), (Tetraspan NET-2).]                                                                                                                                                                                                                                                               | Other Membrane  |
| P01859 | Ig gamma-2 chain C region.                                                                                                                                                                                                                                                                                                                            | Other Membrane  |
| P01871 | Ig mu chain C region.                                                                                                                                                                                                                                                                                                                                 | Other Membrane  |
| P24043 | [Laminin subunit alpha-2 precursor (Laminin M chain) (Merosin heavy, chain).]                                                                                                                                                                                                                                                                         | Other Membrane  |
| P25090 | [FMLP-related receptor I (FMLP-R-I) (Lipoxin A4 receptor) (LXA4, receptor) (Formyl peptide receptor-like 1) (RFP) (HM63).]                                                                                                                                                                                                                            | Other Membrane  |
| P33897 | [ATP-binding cassette sub-family D member 1 (Adrenoleukodystrophy, protein) (ALDP).]                                                                                                                                                                                                                                                                  | Other Membrane  |
| P35498 | [Sodium channel protein type 1 subunit alpha (Sodium channel protein, type I subunit alpha) (Voltage-gated sodium channel subunit alpha, Nav1.1) (Sodium channel protein, brain I subunit alpha).]                                                                                                                                                    | Other Membrane  |
| P36894 | [Bone morphogenetic protein receptor type IA precursor (EC 2.7.11.30), (Serine/threonine-protein kinase receptor R5) (SKR5) (Activin, receptor-like kinase 3) (ALK-3) (CD292 antigen).]                                                                                                                                                               | Other Membrane  |
| P38435 | [Vitamin K-dependent gamma-carboxylase (EC 6.4.-.-) (Gamma-glutamyl, carboxylase) (Vitamin K gamma glutamyl carboxylase).]                                                                                                                                                                                                                            | Other Membrane  |
| P40145 | [Adenylate cyclase type 8 (EC 4.6.1.1) (Adenylate cyclase type VIII), (ATP pyrophosphate-lyase 8) (Adenylyl cyclase 8) (Ca(2+)/calmodulin-, activated adenylyl cyclase).]                                                                                                                                                                             | Other Membrane  |
| Q02643 | [Growth hormone-releasing hormone receptor precursor (GHRH receptor), (GRF receptor) (GRFR).]                                                                                                                                                                                                                                                         | Other Membrane  |
| Q06430 | [N-acetyllactosaminide beta-1,6-N-acetylglucosaminyl-transferase, (EC 2.4.1.150) (N-acetylglucosaminyltransferase) (I-branching enzyme), (IGNT).]                                                                                                                                                                                                     | Other Membrane  |
| Q08462 | [Adenylate cyclase type 2 (EC 4.6.1.1) (Adenylate cyclase type II) (ATP, pyrophosphate-lyase 2) (Adenylyl cyclase 2).]                                                                                                                                                                                                                                | Other Membrane  |
| Q10588 | [ADP-ribosyl cyclase 2 precursor (EC 3.2.2.5) (Cyclic ADP-ribose, hydrolase 2) (cADPr hydrolase 2) (Bone marrow stromal antigen 1) (BST-, 1) (CD157 antigen).]                                                                                                                                                                                        | Other Membrane  |
| Q12802 | [A-kinase anchor protein 13 (AKAP 13) (Protein kinase A-anchoring, protein 13) (Breast cancer nuclear receptor-binding auxiliary protein), (Human thyroid-anchoring protein 31) (Guanine nucleotide exchange, factor Lbc) (AKAP-Lbc) (LBC oncogene) (P47) (Lymphoid blast crisis, oncogene) (Non-oncogenic Rho GTPase-specific GTP exchange factor).] | Other Membrane  |
| Q12860 | [Contactin-1 precursor (Neural cell surface protein F3) (Glycoprotein, gp135).]                                                                                                                                                                                                                                                                       | Other Membrane  |
| Q99747 | [Gamma-soluble NSF attachment protein (SNAP-gamma) (N-ethylmaleimide-, sensitive factor attachment protein, gamma).]                                                                                                                                                                                                                                  | Other Membrane  |
| Q99835 | Smoothed homolog precursor (SMO) (Gx protein).                                                                                                                                                                                                                                                                                                        | Other Membrane  |
| Q9P241 | Probable phospholipid-transporting ATPase VD (EC 3.6.3.1) (ATPVD).                                                                                                                                                                                                                                                                                    | Other Membrane  |
| Q9UKP6 | Urotensin II receptor (UR-II-R) (G-protein coupled receptor 14).                                                                                                                                                                                                                                                                                      | Other Membrane  |
| Q9ULB5 | Cadherin-7 precursor.                                                                                                                                                                                                                                                                                                                                 | Other Membrane  |
| Q9Y2Q0 | [Probable phospholipid-transporting ATPase IA (EC 3.6.3.1) (Chromaffin, granule ATPase II) (ATPase class I type 8A member 1).]                                                                                                                                                                                                                        | Other Membrane  |
| P11171 | Protein 4.1 (Band 4.1) (P4.1) (EPB4.1) (4.1R).                                                                                                                                                                                                                                                                                                        | Plasma Membrane |

|        |                                                                                                                                                                                                                                                              |                 |
|--------|--------------------------------------------------------------------------------------------------------------------------------------------------------------------------------------------------------------------------------------------------------------|-----------------|
| O00155 | Probable G-protein coupled receptor 25.                                                                                                                                                                                                                      | Plasma Membrane |
| O00238 | [Bone morphogenetic protein receptor type IB precursor (EC 2.7.11.30), (CDw293 antigen).]                                                                                                                                                                    | Plasma Membrane |
| O14894 | [Transmembrane 4 L6 family member 5 (Tetraspan transmembrane protein, L6H).]                                                                                                                                                                                 | Plasma Membrane |
| O15393 | [Transmembrane protease, serine 2 precursor (EC 3.4.21.-) (Serine, protease 10) [Contains: Transmembrane protease, serine 2 non-catalytic, chain; Transmembrane protease, serine 2 catalytic chain].]                                                        | Plasma Membrane |
| O15547 | [P2X purinoceptor 6 (ATP receptor) (P2X6) (Purinerbic receptor) (P2XM), (Purinerbic receptor P2X-like 1).]                                                                                                                                                   | Plasma Membrane |
| O43193 | Motilin receptor (G-protein coupled receptor 38).                                                                                                                                                                                                            | Plasma Membrane |
| O43490 | [Prominin-1 precursor (Prominin-like protein 1) (Antigen AC133) (CD133, antigen).]                                                                                                                                                                           | Plasma Membrane |
| O43556 | Epsilon-sarcoglycan precursor (Epsilon-SG).                                                                                                                                                                                                                  | Plasma Membrane |
| O43868 | [Sodium/nucleoside cotransporter 2 (Na+)/nucleoside cotransporter 2), (Sodium-coupled nucleoside transporter 2) (Concentrative nucleoside, transporter 2) (CNT 2) (hCNT2) (Sodium/purine nucleoside co-, transporter) (SPNT).]                               | Plasma Membrane |
| O75899 | [Gamma-aminobutyric acid type B receptor subunit 2 precursor (GABA-B, receptor 2) (GABA-B-R2) (Gb2) (GABABR2) (G-protein coupled receptor, 51) (HG20).]                                                                                                      | Plasma Membrane |
| P08172 | Muscarinic acetylcholine receptor M2.                                                                                                                                                                                                                        | Plasma Membrane |
| P08588 | [Beta-1 adrenergic receptor (Beta-1 adrenoceptor) (Beta-1, adrenoceptor).]                                                                                                                                                                                   | Plasma Membrane |
| P08913 | [Alpha-2A adrenergic receptor (Alpha-2A adrenoceptor) (Alpha-2A, adrenoceptor) (Alpha-2AAR) (Alpha-2 adrenergic receptor subtype, C10).]                                                                                                                     | Plasma Membrane |
| P09693 | [T-cell surface glycoprotein CD3 gamma chain precursor (T-cell receptor, T3 gamma chain).]                                                                                                                                                                   | Plasma Membrane |
| P09848 | [Lactase-phlorizin hydrolase precursor (Lactase-glycosylceramidase), [Includes: Lactase (EC 3.2.1.108); Phlorizin hydrolase (EC 3.2.1.62)].]                                                                                                                 | Plasma Membrane |
| P10747 | T-cell-specific surface glycoprotein CD28 precursor (TP44).                                                                                                                                                                                                  | Plasma Membrane |
| P11021 | [78 kDa glucose-regulated protein precursor (GRP 78) (Heat shock 70 kDa, protein 5) (Immunoglobulin heavy chain-binding protein) (BiP), (Endoplasmic reticulum luminal Ca(2+)-binding protein grp78).]                                                       | Plasma Membrane |
| P13224 | [Platelet glycoprotein Ib beta chain precursor (GP-Ib beta) (GPIbB), (GPIb-beta) (Antigen CD42b-beta) (CD42c antigen).]                                                                                                                                      | Plasma Membrane |
| P13866 | [Sodium/glucose cotransporter 1 (Na+)/glucose cotransporter 1) (High, affinity sodium-glucose cotransporter).]                                                                                                                                               | Plasma Membrane |
| P13945 | [Beta-3 adrenergic receptor (Beta-3 adrenoceptor) (Beta-3, adrenoceptor).]                                                                                                                                                                                   | Plasma Membrane |
| P14384 | Carboxypeptidase M precursor (EC 3.4.17.12) (CPM).                                                                                                                                                                                                           | Plasma Membrane |
| P15328 | [Folate receptor alpha precursor (FR-alpha) (Folate receptor 1) (Folate, receptor, adult) (Adult folate-binding protein) (FBP) (Ovarian tumor-, associated antigen MOv18) (KB cells FBP).]                                                                   | Plasma Membrane |
| P15529 | [Membrane cofactor protein precursor (Trophoblast leukocyte common, antigen) (TLX) (CD46 antigen).]                                                                                                                                                          | Plasma Membrane |
| P16070 | [CD44 antigen precursor (Phagocytic glycoprotein I) (PGP-1) (HUTCH-I), (Extracellular matrix receptor-III) (ECMR-III) (GP90 lymphocyte, homing/adhesion receptor) (Hermes antigen) (Hyaluronate receptor), (Heparan sulfate proteoglycan) (Epican) (CDw44).] | Plasma Membrane |
| P16234 | [Alpha-type platelet-derived growth factor receptor precursor, (EC 2.7.10.1) (PDGF-R-alpha) (CD140a antigen).]                                                                                                                                               | Plasma Membrane |
| P16284 | [Platelet endothelial cell adhesion molecule precursor (PECAM-1), (EndoCAM) (GPIIA') (CD31 antigen).]                                                                                                                                                        | Plasma Membrane |
| P16870 | [Carboxypeptidase E precursor (EC 3.4.17.10) (CPE) (Carboxypeptidase H), (CPH) (Enkephalin convertase) (Prohormone-processing, carboxypeptidase).]                                                                                                           | Plasma Membrane |
| P18433 | [Receptor-type tyrosine-protein phosphatase alpha precursor, (EC 3.1.3.48) (Protein-tyrosine phosphatase alpha) (R-PTP-alpha).]                                                                                                                              | Plasma Membrane |
| P18827 | Syndecan-1 precursor (SYND1) (CD138 antigen).                                                                                                                                                                                                                | Plasma Membrane |

|        |                                                                                                                                                                                                                                                     |                 |
|--------|-----------------------------------------------------------------------------------------------------------------------------------------------------------------------------------------------------------------------------------------------------|-----------------|
| P20039 | [HLA class II histocompatibility antigen, DRB1-11 beta chain precursor, (MHC class I antigen DRB1*11) (DR-5) (DR5) (DRw11).]                                                                                                                        | Plasma Membrane |
| P20594 | [Atrial natriuretic peptide receptor B precursor (ANP-B) (ANPRB) (GC-B), (Guanylate cyclase B) (EC 4.6.1.2) (NPR-B) (Atrial natriuretic peptide, B type receptor).]                                                                                 | Plasma Membrane |
| P20701 | [Integrin alpha-L precursor (Leukocyte adhesion glycoprotein LFA-1, alpha chain) (LFA-1A) (Leukocyte function-associated molecule 1 alpha, chain) (CD11a antigen).]                                                                                 | Plasma Membrane |
| P21439 | [Multidrug resistance protein 3 (EC 3.6.3.44) (ATP-binding cassette, sub-family B member 4) (P-glycoprotein 3).]                                                                                                                                    | Plasma Membrane |
| P42262 | [Glutamate receptor 2 precursor (GluR-2) (GluR-B) (GluR-K2) (Glutamate, receptor ionotropic, AMPA 2) (AMPA-selective glutamate receptor 2).]                                                                                                        | Plasma Membrane |
| P42702 | [Leukemia inhibitory factor receptor precursor (LIF receptor) (LIF-R), (CD118 antigen).]                                                                                                                                                            | Plasma Membrane |
| P43121 | [Cell surface glycoprotein MUC18 precursor (Melanoma-associated antigen, MUC18) (Melanoma cell adhesion molecule) (Melanoma-associated antigen, A32) (S-endo 1 endothelial-associated antigen) (Cell surface, glycoprotein P1H12) (CD146 antigen).] | Plasma Membrane |
| P43630 | [Killer cell immunoglobulin-like receptor 3DL2 precursor (MHC class I, NK cell receptor) (Natural killer-associated transcript 4) (NKAT-4), (p70 natural killer cell receptor clone CL-5) (CD158k antigen).]                                        | Plasma Membrane |
| P47872 | Secretin receptor precursor (SCT-R).                                                                                                                                                                                                                | Plasma Membrane |
| P48169 | [Gamma-aminobutyric acid receptor subunit alpha-4 precursor (GABA(A), receptor subunit alpha-4).]                                                                                                                                                   | Plasma Membrane |
| P48995 | Short transient receptor potential channel 1 (TrpC1) (TRP-1 protein).                                                                                                                                                                               | Plasma Membrane |
| P49683 | [Prolactin-releasing peptide receptor (PrRP receptor) (PrRPR) (G-, protein coupled receptor 10) (hGR3).]                                                                                                                                            | Plasma Membrane |
| P51572 | [B-cell receptor-associated protein 31 (BCR-associated protein Bap31), (p28 Bap31) (Protein CDM) (6C6-AG tumor-associated antigen).]                                                                                                                | Plasma Membrane |
| P51790 | Chloride channel protein 3 (ClC-3).                                                                                                                                                                                                                 | Plasma Membrane |
| P51800 | Chloride channel protein ClC-Ka (Chloride channel Ka) (ClC-K1).                                                                                                                                                                                     | Plasma Membrane |
| P51841 | [Retinal guanylyl cyclase 2 precursor (EC 4.6.1.2) (Guanylate cyclase, 2F, retinal) (RETGC-2) (Rod outer segment membrane guanylate cyclase, 2) (ROS-GC2) (Guanylate cyclase F) (GC-F).]                                                            | Plasma Membrane |
| P54764 | [Ephrin type-A receptor 4 precursor (EC 2.7.10.1) (Tyrosine-protein, kinase receptor SEK) (Receptor protein-tyrosine kinase HEK8), (Tyrosine-protein kinase TYRO1).]                                                                                | Plasma Membrane |
| P54826 | Growth arrest-specific protein 1 precursor (GAS-1).                                                                                                                                                                                                 | Plasma Membrane |
| P55011 | [Solute carrier family 12 member 2 (Bumetanide-sensitive sodium-, (potassium)-chloride cotransporter 1) (Basolateral Na-K-Cl symporter).]                                                                                                           | Plasma Membrane |
| P55087 | [Aquaporin-4 (AQP-4) (WCH4) (Mercurial-insensitive water channel), (MIWC).]                                                                                                                                                                         | Plasma Membrane |
| Q13488 | [Vacuolar proton translocating ATPase 116 kDa subunit a isoform 3 (V-, ATPase 116 kDa isoform a3) (Osteoclastic proton pump 116 kDa subunit), (OC-116 kDa) (OC116) (T-cell immune regulator 1) (T-cell immune, response cDNA7 protein) (TIRC7).]    | Plasma Membrane |
| Q13508 | [Ecto-ADP-ribosyltransferase 3 precursor (EC 2.4.2.31) (NAD(P)(+)-, arginine ADP-ribosyltransferase 3) (Mono(ADP-ribosyl)transferase 3).]                                                                                                           | Plasma Membrane |
| Q13635 | Protein patched homolog 1 (PTC1) (PTC).                                                                                                                                                                                                             | Plasma Membrane |
| Q13797 | Integrin alpha-9 precursor (Integrin alpha-RLC).                                                                                                                                                                                                    | Plasma Membrane |
| Q13972 | [Guanine nucleotide-releasing protein (GNRP) (Ras-specific nucleotide, exchange factor CDC25) (Ras-specific guanine nucleotide-releasing, factor).]                                                                                                 | Plasma Membrane |
| Q14246 | [EGF-like module-containing mucin-like hormone receptor-like 1, precursor (Cell surface glycoprotein EMR1) (EMR1 hormone receptor).]                                                                                                                | Plasma Membrane |



|        |                                                                                                                                                                                                                                                                 |                 |
|--------|-----------------------------------------------------------------------------------------------------------------------------------------------------------------------------------------------------------------------------------------------------------------|-----------------|
| Q14254 | Flotillin-2 (Epidermal surface antigen) (ESA).                                                                                                                                                                                                                  | Plasma Membrane |
| Q14392 | [Leucine-rich repeat-containing protein 32 precursor (GARP protein), (Garpin) (Glycoprotein A repetitions predominant).]                                                                                                                                        | Plasma Membrane |
| Q14831 | Metabotropic glutamate receptor 7 precursor (mGluR7).                                                                                                                                                                                                           | Plasma Membrane |
| Q15262 | [Receptor-type tyrosine-protein phosphatase kappa precursor, (EC 3.1.3.48) (Protein-tyrosine phosphatase kappa) (R-PTP-kappa).]                                                                                                                                 | Plasma Membrane |
| Q15465 | [Sonic hedgehog protein precursor (SHH) (HHG-1) [Contains: Sonic, hedgehog protein N-product; Sonic hedgehog protein C-product].]                                                                                                                               | Plasma Membrane |
| Q16099 | [Glutamate receptor, ionotropic kainate 4 precursor (Glutamate receptor, KA-1) (KA1) (Excitatory amino acid receptor 1) (EAA1).]                                                                                                                                | Plasma Membrane |
| Q16720 | [Plasma membrane calcium-transporting ATPase 3 (EC 3.6.3.8) (PMCA3), (Plasma membrane calcium pump isoform 3) (Plasma membrane calcium, ATPase isoform 3).]                                                                                                     | Plasma Membrane |
| Q92633 | Lysophosphatidic acid receptor Edg-2 (LPA receptor 1) (LPA-1).                                                                                                                                                                                                  | Plasma Membrane |
| Q92673 | [Sortilin-related receptor precursor (Sorting protein-related receptor, containing LDLR class A repeats) (SorLA) (SorLA-1) (Low-density, lipoprotein receptor relative with 11 ligand-binding repeats) (LDLR, relative with 11 ligand-binding repeats) (LR11).] | Plasma Membrane |
| Q92729 | [Receptor-type tyrosine-protein phosphatase U precursor (EC 3.1.3.48), (R-PTP-U) (Protein-tyrosine phosphatase J) (PTP-J) (Pancreatic, carcinoma phosphatase 2) (PCP-2).]                                                                                       | Plasma Membrane |
| Q92736 | [Ryanodine receptor 2 (Cardiac muscle-type ryanodine receptor) (RyR2), (RYR-2) (Cardiac muscle ryanodine receptor-calcium release channel), (hRYR-2).]                                                                                                          | Plasma Membrane |
| Q92859 | Neogenin precursor.                                                                                                                                                                                                                                             | Plasma Membrane |
| Q92887 | [Canalicular multispecific organic anion transporter 1 (ATP-binding, cassette sub-family C member 2) (Multidrug resistance-associated, protein 2) (Canalicular multidrug resistance protein).]                                                                  | Plasma Membrane |
| Q92959 | [Solute carrier organic anion transporter family member 2A1 (Solute, carrier family 21 member 2) (Prostaglandin transporter) (PGT).]                                                                                                                            | Plasma Membrane |
| O76090 | Bestrophin-1 (Vitelliform macular dystrophy protein 2) (TU15B).                                                                                                                                                                                                 | Plasma Membrane |
| O94759 | [Transient receptor potential cation channel subfamily M member 2, (EC 3.6.1.13) (Long transient receptor potential channel 2) (LTrpC2), (LTrpC-2) (Transient receptor potential channel 7) (TrpC7) (Estrogen-, responsive element-associated gene 1 protein).] | Plasma Membrane |
| O95279 | [Potassium channel subfamily K member 5 (Acid-sensitive potassium, channel protein TASK-2) (TWIK-related acid-sensitive K(+) channel 2).]                                                                                                                       | Plasma Membrane |
| O95971 | CD160 antigen precursor (Natural killer cell receptor BY55).                                                                                                                                                                                                    | Plasma Membrane |
| P26006 | [Integrin alpha-3 precursor (Galactoprotein B3) (GAPB3) (VLA-3 alpha, chain) (FRP-2) (CD49c antigen) [Contains: Integrin alpha-3 heavy, chain; Integrin alpha-3 light chain].]                                                                                  | Plasma Membrane |
| P01589 | [Interleukin-2 receptor alpha chain precursor (IL-2 receptor alpha, subunit) (IL-2-RA) (IL2-RA) (p55) (TAC antigen) (CD25 antigen).]                                                                                                                            | Plasma Membrane |
| P05187 | [Alkaline phosphatase, placental type precursor (EC 3.1.3.1) (PLAP-1), (Alkaline phosphatase Regan isozyme).]                                                                                                                                                   | Plasma Membrane |
| P05362 | [Intercellular adhesion molecule 1 precursor (ICAM-1) (Major group, rhinovirus receptor) (CD54 antigen).]                                                                                                                                                       | Plasma Membrane |
| P05981 | [Serine protease hepsin (EC 3.4.21.106) (Transmembrane protease, serine, 1) [Contains: Serine protease hepsin non-catalytic chain; Serine, protease hepsin catalytic chain].]                                                                                   | Plasma Membrane |
| P06213 | [Insulin receptor precursor (EC 2.7.10.1) (IR) (CD220 antigen), [Contains: Insulin receptor subunit alpha; Insulin receptor subunit, beta].]                                                                                                                    | Plasma Membrane |
| P06756 | [Integrin alpha-V precursor (Vitronectin receptor subunit alpha) (CD51, antigen) [Contains: Integrin alpha-V heavy chain; Integrin alpha-V, light chain].]                                                                                                      | Plasma Membrane |
| P07202 | Thyroid peroxidase precursor (EC 1.11.1.8) (TPO).                                                                                                                                                                                                               | Plasma Membrane |

|        |                                                                                                                                                                                                                   |                 |
|--------|-------------------------------------------------------------------------------------------------------------------------------------------------------------------------------------------------------------------|-----------------|
| P21757 | [Macrophage scavenger receptor types I and II (Macrophage acetylated, LDL receptor I and II) (Scavenger receptor class A member 1) (CD204, antigen).]                                                             | Plasma Membrane |
| P21854 | B-cell differentiation antigen CD72 (Lyb-2).                                                                                                                                                                      | Plasma Membrane |
| P23276 | Kell blood group glycoprotein (EC 3.4.24.-) (CD238 antigen).                                                                                                                                                      | Plasma Membrane |
| P23416 | Glycine receptor subunit alpha-2 precursor.                                                                                                                                                                       | Plasma Membrane |
| P23470 | [Receptor-type tyrosine-protein phosphatase gamma precursor, (EC 3.1.3.48) (Protein-tyrosine phosphatase gamma) (R-PTP-gamma).]                                                                                   | Plasma Membrane |
| P24046 | [Gamma-aminobutyric acid receptor subunit rho-1 precursor (GABA(A), receptor subunit rho-1).]                                                                                                                     | Plasma Membrane |
| P24588 | [A-kinase anchor protein 5 (A-kinase anchor protein 79 kDa) (AKAP 79), (cAMP-dependent protein kinase regulatory subunit II high affinity-, binding protein) (H21).]                                              | Plasma Membrane |
| P28290 | [Sperm-specific antigen 2 (Cleavage signal-1 protein) (CS-1) (Ki-ras-, induced actin-interacting protein).]                                                                                                       | Plasma Membrane |
| P28336 | [Neuromedin-B receptor (NMB-R) (Neuromedin-B-preferring bombesin, receptor).]                                                                                                                                     | Plasma Membrane |
| P28827 | [Receptor-type tyrosine-protein phosphatase mu precursor (EC 3.1.3.48), (Protein-tyrosine phosphatase mu) (R-PTP-mu).]                                                                                            | Plasma Membrane |
| P29320 | [Ephrin type-A receptor 3 precursor (EC 2.7.10.1) (Tyrosine-protein, kinase receptor ETK1) (HEK) (HEK4) (Tyrosine-protein kinase TYRO4).]                                                                         | Plasma Membrane |
| P30301 | Lens fiber major intrinsic protein (Aquaporin-0) (MIP26) (MP26).                                                                                                                                                  | Plasma Membrane |
| P31785 | [Cytokine receptor common gamma chain precursor (Gamma-C) (Interleukin-, 2 receptor gamma chain) (IL-2R gamma chain) (p64) (CD132 antigen).]                                                                      | Plasma Membrane |
| P35499 | [Sodium channel protein type 4 subunit alpha (Sodium channel protein, type IV subunit alpha) (Voltage-gated sodium channel subunit alpha, Nav1.4) (Sodium channel protein skeletal muscle subunit alpha) (SkM1).] | Plasma Membrane |
| P35523 | [Chloride channel protein, skeletal muscle (Chloride channel protein 1), (ClC-1).]                                                                                                                                | Plasma Membrane |
| P35916 | [Vascular endothelial growth factor receptor 3 precursor (EC 2.7.10.1), (VEGFR-3) (Tyrosine-protein kinase receptor FLT4).]                                                                                       | Plasma Membrane |
| P36021 | [Monocarboxylate transporter 8 (MCT 8) (MCT 7) (Solute carrier family, 16 member 2) (X-linked PEST-containing transporter).]                                                                                      | Plasma Membrane |
| P36896 | [Activin receptor type-1B precursor (EC 2.7.11.30) (ACTR-1B), (Serine/threonine-protein kinase receptor R2) (SKR2) (Activin, receptor-like kinase 4) (ALK-4).]                                                    | Plasma Membrane |
| P37023 | [Serine/threonine-protein kinase receptor R3 precursor (EC 2.7.11.30), (SKR3) (Activin receptor-like kinase 1) (ALK-1) (TGF-B superfamily, receptor type I) (TSR-I).]                                             | Plasma Membrane |
| P38646 | [Stress-70 protein, mitochondrial precursor (75 kDa glucose-regulated, protein) (GRP 75) (Heat shock 70 kDa protein 9) (Peptide-binding, protein 74) (PBP74) (Mortalin) (MOT).]                                   | Plasma Membrane |
| P40197 | Platelet glycoprotein V precursor (GPV) (CD42D antigen).                                                                                                                                                          | Plasma Membrane |
| P40259 | [B-cell antigen receptor complex-associated protein beta-chain, precursor (B-cell-specific glycoprotein B29) (Immunoglobulin-, associated B29 protein) (IG-beta) (CD79b antigen).]                                | Plasma Membrane |
| P41594 | Metabotropic glutamate receptor 5 precursor (mGluR5).                                                                                                                                                             | Plasma Membrane |
| P63027 | Vesicle-associated membrane protein 2 (VAMP-2) (Synaptobrevin-2).                                                                                                                                                 | Plasma Membrane |
| P78325 | [ADAM 8 precursor (EC 3.4.24.-) (A disintegrin and metalloproteinase, domain 8) (Cell surface antigen MS2) (CD156a antigen) (CD156).]                                                                             | Plasma Membrane |
| P78334 | [Gamma-aminobutyric acid receptor subunit epsilon precursor (GABA(A), receptor subunit epsilon).]                                                                                                                 | Plasma Membrane |
| P78536 | [ADAM 17 precursor (EC 3.4.24.86) (A disintegrin and metalloproteinase, domain 17) (TNF-alpha-converting enzyme) (TNF-alpha convertase) (Snake, venom-like protease) (CD156b antigen).]                           | Plasma Membrane |

|        |                                                                                                                                                                                                                                                                                                                                                                                                                                                                                                                                                                                                                                                                                                                        |                 |
|--------|------------------------------------------------------------------------------------------------------------------------------------------------------------------------------------------------------------------------------------------------------------------------------------------------------------------------------------------------------------------------------------------------------------------------------------------------------------------------------------------------------------------------------------------------------------------------------------------------------------------------------------------------------------------------------------------------------------------------|-----------------|
| P78562 | [Phosphate-regulating neutral endopeptidase (EC 3.4.24.-), (Metalloendopeptidase homolog PEX) (X-linked hypophosphatemia protein), (HYP) (Vitamin D-resistant hypophosphatemic rickets protein).]                                                                                                                                                                                                                                                                                                                                                                                                                                                                                                                      | Plasma Membrane |
| P98161 | [Polycystin-1 precursor (Autosomal dominant polycystic kidney disease, protein 1).]                                                                                                                                                                                                                                                                                                                                                                                                                                                                                                                                                                                                                                    | Plasma Membrane |
| P98172 | [Ephrin-B1 precursor (EPH-related receptor tyrosine kinase ligand 2), (LERK-2) (ELK ligand) (ELK-L).]                                                                                                                                                                                                                                                                                                                                                                                                                                                                                                                                                                                                                  | Plasma Membrane |
| Q03405 | [Urokinase plasminogen activator surface receptor precursor (uPAR) (U-, PAR) (Monocyte activation antigen Mo3) (CD87 antigen).]                                                                                                                                                                                                                                                                                                                                                                                                                                                                                                                                                                                        | Plasma Membrane |
| Q04609 | [Glutamate carboxypeptidase 2 (EC 3.4.17.21) (Glutamate, carboxypeptidase II) (Membrane glutamate carboxypeptidase) (mGCP) (N-, acetylated-alpha-linked acidic dipeptidase I) (NAALADase I), (Pteroylpoly-gamma-glutamate carboxypeptidase) (Folypoly-gamma-, glutamate carboxypeptidase) (FGCP) (Folate hydrolase 1) (Prostate-, specific membrane antigen) (PSMA) (PSM).]                                                                                                                                                                                                                                                                                                                                            | Plasma Membrane |
| Q05940 | [Synaptic vesicular amine transporter (Monoamine transporter), (Vesicular amine transporter 2) (VAT2) (Solute carrier family 18, member 2).]                                                                                                                                                                                                                                                                                                                                                                                                                                                                                                                                                                           | Plasma Membrane |
| Q07075 | [Glutamyl aminopeptidase (EC 3.4.11.7) (EAP) (Aminopeptidase A) (APA), (Differentiation antigen gp160) (CD249 antigen).]                                                                                                                                                                                                                                                                                                                                                                                                                                                                                                                                                                                               | Plasma Membrane |
| Q12879 | [Glutamate [NMDA] receptor subunit epsilon-1 precursor (N-methyl D-, aspartate receptor subtype 2A) (NR2A) (NMDAR2A) (hNR2A).]                                                                                                                                                                                                                                                                                                                                                                                                                                                                                                                                                                                         | Plasma Membrane |
| Q12913 | [Receptor-type tyrosine-protein phosphatase eta precursor (EC 3.1.3.48), (Protein-tyrosine phosphatase eta) (R-PTP-eta) (HPTP eta) (Protein-, tyrosine phosphatase receptor type J) (Density-enhanced phosphatase 1), (DEP-1) (CD148 antigen).]                                                                                                                                                                                                                                                                                                                                                                                                                                                                        | Plasma Membrane |
| Q13003 | [Glutamate receptor, ionotropic kainate 3 precursor (Glutamate receptor, 7) (GluR-7) (GluR7) (Excitatory amino acid receptor 5) (EAA5).]                                                                                                                                                                                                                                                                                                                                                                                                                                                                                                                                                                               | Plasma Membrane |
| Q13224 | [Glutamate [NMDA] receptor subunit epsilon-2 precursor (N-methyl D-, aspartate receptor subtype 2B) (NR2B) (NMDAR2B) (N-methyl-D-aspartate, receptor subunit 3) (NR3) (hNR3).]                                                                                                                                                                                                                                                                                                                                                                                                                                                                                                                                         | Plasma Membrane |
| Q13368 | MAGUK p55 subfamily member 3 (Protein MPP3) (Discs large homolog 3).                                                                                                                                                                                                                                                                                                                                                                                                                                                                                                                                                                                                                                                   | Plasma Membrane |
| Q93086 | P2X purinoceptor 5 (ATP receptor) (P2X5) (Purinergic receptor).                                                                                                                                                                                                                                                                                                                                                                                                                                                                                                                                                                                                                                                        | Plasma Membrane |
| Q99075 | [Proheparin-binding EGF-like growth factor precursor [Contains:, Heparin-binding EGF-like growth factor (HB-EGF) (HBEGF) (Diphtheria, toxin receptor) (DT-R)].]                                                                                                                                                                                                                                                                                                                                                                                                                                                                                                                                                        | Plasma Membrane |
| Q99965 | [ADAM 2 precursor (A disintegrin and metalloproteinase domain 2), (Fertilin subunit beta) (PH-30) (PH30) (Cancer/testis antigen 15), (CT15).]                                                                                                                                                                                                                                                                                                                                                                                                                                                                                                                                                                          | Plasma Membrane |
| Q9UBN1 | [Voltage-dependent calcium channel gamma-4 subunit (Neuronal voltage-, gated calcium channel gamma-4 subunit).]                                                                                                                                                                                                                                                                                                                                                                                                                                                                                                                                                                                                        | Plasma Membrane |
| Q9UJS0 | [Calcium-binding mitochondrial carrier protein Aralar2 (Mitochondrial, aspartate glutamate carrier 2) (Solute carrier family 25 member 13), (Citrin).]                                                                                                                                                                                                                                                                                                                                                                                                                                                                                                                                                                 | Plasma Membrane |
| Q9UKX5 | Integrin alpha-11 precursor.                                                                                                                                                                                                                                                                                                                                                                                                                                                                                                                                                                                                                                                                                           | Plasma Membrane |
| Q9ULB1 | Neurexin-1-alpha precursor (Neurexin I-alpha).                                                                                                                                                                                                                                                                                                                                                                                                                                                                                                                                                                                                                                                                         | Plasma Membrane |
| Q9ULZ9 | [Matrix metalloproteinase-17 precursor (EC 3.4.24.-) (MMP-17), (Membrane-type matrix metalloproteinase 4) (MT-MMP 4) (Membrane-type-4, matrix metalloproteinase) (MT4-MMP).]                                                                                                                                                                                                                                                                                                                                                                                                                                                                                                                                           | Plasma Membrane |
| Q9Y2T5 | Probable G-protein coupled receptor 52.                                                                                                                                                                                                                                                                                                                                                                                                                                                                                                                                                                                                                                                                                | Plasma Membrane |
| P05067 | [Amyloid beta A4 protein precursor (APP) (ABPP) (Alzheimer disease, amyloid protein) (Cerebral vascular amyloid peptide) (CVAP) (Protease, nexin-II) (PN-II) (APPI) (PreA4) [Contains: Soluble APP-alpha (S-APP-, alpha); Soluble APP-beta (S-APP-beta); C99; Beta-amyloid protein 42, (Beta-APP42); Beta-amyloid protein 40 (Beta-APP40); C83; P3(42);, P3(40); Gamma-CTF(59) (Gamma-secretase C-terminal fragment 59), (Amyloid intracellular domain 59) (AID(59)) (AICD-59); Gamma-CTF(57), (Gamma-secretase C-terminal fragment 57) (Amyloid intracellular domain, 57) (AID(57)) (AICD-57); Gamma-CTF(50) (Gamma-secretase C-terminal, fragment 50) (Amyloid intracellular domain 50) (AID(50)) (AICD-50);, C31].] | Plasma Membrane |
| O00159 | Myosin-Ic (Myosin I beta) (MMI-beta) (MMIb).                                                                                                                                                                                                                                                                                                                                                                                                                                                                                                                                                                                                                                                                           | Plasma Membrane |

|        |                                                                                                                                                                                                                                                                                                                                                                                   |                 |
|--------|-----------------------------------------------------------------------------------------------------------------------------------------------------------------------------------------------------------------------------------------------------------------------------------------------------------------------------------------------------------------------------------|-----------------|
| O00219 | [Hyaluronan synthase 3 (EC 2.4.1.212) (Hyaluronate synthase 3), (Hyaluronic acid synthase 3) (HA synthase 3).]                                                                                                                                                                                                                                                                    | Plasma Membrane |
| O00337 | [Sodium/nucleoside cotransporter 1 (Na(+)/nucleoside cotransporter 1), (Sodium-coupled nucleoside transporter 1) (Concentrative nucleoside, transporter 1) (CNT 1) (hCNT1).]                                                                                                                                                                                                      | Plasma Membrane |
| O00526 | Uroplakin-2 precursor (UP 2) (Uroplakin II) (UPII).                                                                                                                                                                                                                                                                                                                               | Plasma Membrane |
| O14520 | Aquaporin-7 (AQP-7) (Aquaporin-7-like) (Aquaporin adipose) (AQPap).                                                                                                                                                                                                                                                                                                               | Plasma Membrane |
| O14807 | Ras-related protein M-Ras precursor (Ras-related protein R-Ras3).                                                                                                                                                                                                                                                                                                                 | Plasma Membrane |
| O14843 | Free fatty acid receptor 3 (G-protein coupled receptor 41).                                                                                                                                                                                                                                                                                                                       | Plasma Membrane |
| O15075 | [Serine/threonine-protein kinase DCLK1 (EC 2.7.11.1) (Doublecortin-like, and CAM kinase-like 1) (Doublecortin-like kinase 1).]                                                                                                                                                                                                                                                    | Plasma Membrane |
| O15162 | [Phospholipid scramblase 1 (PL scramblase 1) (Ca(2+)-dependent, phospholipid scramblase 1) (Erythrocyte phospholipid scramblase), (MmTRA1b).]                                                                                                                                                                                                                                     | Plasma Membrane |
| O15374 | [Monocarboxylate transporter 5 (MCT 5) (MCT 4) (Solute carrier family, 16 member 4).]                                                                                                                                                                                                                                                                                             | Plasma Membrane |
| O15440 | [Multidrug resistance-associated protein 5 (ATP-binding cassette sub-, family C member 5) (Multi-specific organic anion transporter-C) (MOAT-, C) (pABC11) (SMRP).]                                                                                                                                                                                                               | Plasma Membrane |
| O43520 | [Probable phospholipid-transporting ATPase IC (EC 3.6.3.1) (Familial, intrahepatic cholestasis type 1) (ATPase class I type 8B member 1).]                                                                                                                                                                                                                                        | Plasma Membrane |
| O43613 | Orexin receptor type 1 (Ox1r) (Hypocretin receptor type 1).                                                                                                                                                                                                                                                                                                                       | Plasma Membrane |
| O60469 | Down syndrome cell adhesion molecule precursor (CHD2).                                                                                                                                                                                                                                                                                                                            | Plasma Membrane |
| O60503 | [Adenylate cyclase type 9 (EC 4.6.1.1) (Adenylate cyclase type IX) (ATP, pyrophosphate-lyase 9) (Adenylyl cyclase 9).]                                                                                                                                                                                                                                                            | Plasma Membrane |
| O75578 | Integrin alpha-10 precursor.                                                                                                                                                                                                                                                                                                                                                      | Plasma Membrane |
| O75787 | [Renin receptor precursor (Renin/prorenin receptor) (ATPase H(+)-, transporting lysosomal accessory protein 2) (ATPase H(+)-transporting, lysosomal-interacting protein 2) (Vacuolar ATP synthase membrane, sector-associated protein M8-9) (V-ATPase M8.9 subunit) (ATP6M8-9), (N14F) (ER-localized type I transmembrane adaptor) (Embryonic liver, differentiation factor 10).] | Plasma Membrane |
| P08069 | [Insulin-like growth factor 1 receptor precursor (EC 2.7.10.1), (Insulin-like growth factor I receptor) (IGF-I receptor) (CD221, antigen) [Contains: Insulin-like growth factor 1 receptor alpha chain;, Insulin-like growth factor 1 receptor beta chain].]                                                                                                                      | Plasma Membrane |
| P08173 | Muscarinic acetylcholine receptor M4.                                                                                                                                                                                                                                                                                                                                             | Plasma Membrane |
| P08195 | [4F2 cell-surface antigen heavy chain (4F2hc) (Lymphocyte activation, antigen 4F2 large subunit) (4F2 heavy chain antigen) (CD98 antigen).]                                                                                                                                                                                                                                       | Plasma Membrane |
| P08571 | [Monocyte differentiation antigen CD14 precursor (Myeloid cell-specific, leucine-rich glycoprotein) [Contains: Monocyte differentiation antigen, CD14, urinary form; Monocyte differentiation antigen CD14, membrane-, bound form].]                                                                                                                                              | Plasma Membrane |
| P08581 | [Hepatocyte growth factor receptor precursor (EC 2.7.10.1) (HGF, receptor) (Scatter factor receptor) (SF receptor) (HGF/SF receptor), (Met proto-oncogene tyrosine kinase) (c-Met).]                                                                                                                                                                                              | Plasma Membrane |
| P11142 | Heat shock cognate 71 kDa protein (Heat shock 70 kDa protein 8).                                                                                                                                                                                                                                                                                                                  | Plasma Membrane |
| P11362 | [Basic fibroblast growth factor receptor 1 precursor (EC 2.7.10.1), (FGFR-1) (bFGF-R) (Fms-like tyrosine kinase 2) (c-fgr) (CD331, antigen).]                                                                                                                                                                                                                                     | Plasma Membrane |
| P14416 | D(2) dopamine receptor (Dopamine D2 receptor).                                                                                                                                                                                                                                                                                                                                    | Plasma Membrane |
| P14616 | [Insulin receptor-related protein precursor (EC 2.7.10.1) (IRR) (IR-, related receptor) [Contains: Insulin receptor-related protein alpha, chain; Insulin receptor-related protein beta chain].]                                                                                                                                                                                  | Plasma Membrane |
| P14867 | [Gamma-aminobutyric acid receptor subunit alpha-1 precursor (GABA(A), receptor subunit alpha-1).]                                                                                                                                                                                                                                                                                 | Plasma Membrane |
| P15812 | T-cell surface glycoprotein CD1e precursor (CD1e antigen) (R2G1).                                                                                                                                                                                                                                                                                                                 | Plasma Membrane |
| P16157 | Ankyrin-1 (Erythrocyte ankyrin) (Ankyrin-R).                                                                                                                                                                                                                                                                                                                                      | Plasma Membrane |

|        |                                                                                                                                                                                                            |                 |
|--------|------------------------------------------------------------------------------------------------------------------------------------------------------------------------------------------------------------|-----------------|
| P16471 | Prolactin receptor precursor (PRL-R).                                                                                                                                                                      | Plasma Membrane |
| P17081 | [Rho-related GTP-binding protein RhoQ precursor (Ras-related GTP-, binding protein TC10).]                                                                                                                 | Plasma Membrane |
| P17181 | Interferon-alpha/beta receptor alpha chain precursor (IFN-alpha-REC).                                                                                                                                      | Plasma Membrane |
| P17677 | [Neuromodulin (Axonal membrane protein GAP-43) (Growth-associated, protein 43) (PP46) (Neural phosphoprotein B-50).]                                                                                       | Plasma Membrane |
| P18089 | [Alpha-2B adrenergic receptor (Alpha-2B adrenoceptor) (Alpha-2B, adrenoceptor) (Alpha-2 adrenergic receptor subtype C2).]                                                                                  | Plasma Membrane |
| P18564 | Integrin beta-6 precursor.                                                                                                                                                                                 | Plasma Membrane |
| P20020 | [Plasma membrane calcium-transporting ATPase 1 (EC 3.6.3.8) (PMCA1), (Plasma membrane calcium pump isoform 1) (Plasma membrane calcium, ATPase isoform 1).]                                                | Plasma Membrane |
| P20648 | [Potassium-transporting ATPase alpha chain 1 (EC 3.6.3.10) (Proton, pump) (Gastric H(+)/K(+) ATPase subunit alpha).]                                                                                       | Plasma Membrane |
| P47900 | P2Y purinoceptor 1 (ATP receptor) (P2Y1) (Purinergic receptor).                                                                                                                                            | Plasma Membrane |
| P49019 | [Nicotinic acid receptor 2 (G-protein coupled receptor 109B) (G-protein, coupled receptor HM74) (G-protein coupled receptor HM74B).]                                                                       | Plasma Membrane |
| P49286 | Melatonin receptor type 1B (Mel-1B-R) (Mel1b melatonin receptor).                                                                                                                                          | Plasma Membrane |
| P49757 | Protein numb homolog (h-Numb) (Protein S171).                                                                                                                                                              | Plasma Membrane |
| P49961 | [Ectonucleoside triphosphate diphosphohydrolase 1 (EC 3.6.1.5) (NTPDase, 1) (Ecto-ATP diphosphohydrolase) (ATPDase) (Lymphoid cell activation, antigen) (Ecto-apyrase) (CD39 antigen).]                    | Plasma Membrane |
| P50281 | [Matrix metalloproteinase-14 precursor (EC 3.4.24.80) (MMP-14), (Membrane-type matrix metalloproteinase 1) (MT-MMP 1) (MTMMP1), (Membrane-type-1 matrix metalloproteinase) (MT1-MMP) (MT1MMP) (MMP-, X1).] | Plasma Membrane |
| P51575 | P2X purinoceptor 1 (ATP receptor) (P2X1) (Purinergic receptor).                                                                                                                                            | Plasma Membrane |
| P51795 | Chloride channel protein 5 (ClC-5).                                                                                                                                                                        | Plasma Membrane |
| P52569 | [Low affinity cationic amino acid transporter 2 (CAT-2) (CAT2) (Solute, carrier family 7 member 2).]                                                                                                       | Plasma Membrane |
| P53708 | [Integrin alpha-8 precursor [Contains: Integrin alpha-8 heavy chain;, Integrin alpha-8 light chain].]                                                                                                      | Plasma Membrane |
| P54652 | Heat shock-related 70 kDa protein 2 (Heat shock 70 kDa protein 2).                                                                                                                                         | Plasma Membrane |
| P54760 | [Ephrin type-B receptor 4 precursor (EC 2.7.10.1) (Tyrosine-protein, kinase receptor HTK) (Tyrosine-protein kinase TYRO11).]                                                                               | Plasma Membrane |
| P55064 | Aquaporin-5 (AQP-5).                                                                                                                                                                                       | Plasma Membrane |
| P56199 | [Integrin alpha-1 precursor (Laminin and collagen receptor) (VLA-1), (CD49a antigen).]                                                                                                                     | Plasma Membrane |
| P56589 | [Peroxisomal biogenesis factor 3 (Peroxin-3) (Peroxisomal assembly, protein PEX3).]                                                                                                                        | Plasma Membrane |
| Q13873 | [Bone morphogenetic protein receptor type-2 precursor (EC 2.7.11.30), (Bone morphogenetic protein receptor type II) (BMP type II receptor), (BMPR-II).]                                                    | Plasma Membrane |
| Q14108 | [Lysosome membrane protein 2 (Lysosome membrane protein II) (LIMP II), (Scavenger receptor class B member 2) (85 kDa lysosomal membrane, sialoglycoprotein) (LGP85) (CD36 antigen-like 2).]                | Plasma Membrane |
| Q14126 | Desmoglein-2 precursor (HDGC).                                                                                                                                                                             | Plasma Membrane |
| Q14444 | [Caprin-1 (Cytoplasmic activation- and proliferation-associated protein, 1) (GPI-anchored membrane protein 1) (GPI-anchored protein p137), (p137GPI) (Membrane component chromosome 11 surface marker 1).] | Plasma Membrane |
| Q14644 | [Ras GTPase-activating protein 3 (GAP1(IP4BP)) (Ins P4-binding, protein).]                                                                                                                                 | Plasma Membrane |
| Q14957 | [Glutamate [NMDA] receptor subunit epsilon-3 precursor (N-methyl D-, aspartate receptor subtype 2C) (NR2C) (NMDAR2C).]                                                                                     | Plasma Membrane |
| Q14982 | [Opioid-binding protein/cell adhesion molecule precursor (OBCAM), (Opioid-binding cell adhesion molecule) (OPCML).]                                                                                        | Plasma Membrane |
| Q15149 | Plectin-1 (PLTN) (PCN) (Hemidesmosomal protein 1) (HD1) (Plectin-11).                                                                                                                                      | Plasma Membrane |
| Q15700 | [Disks large homolog 2 (Postsynaptic density protein PSD-93) (Channel-, associated protein of synapse-110) (Chapsyn-110).]                                                                                 | Plasma Membrane |

|        |                                                                                                                                                                                                                                                                                                                                                 |                 |
|--------|-------------------------------------------------------------------------------------------------------------------------------------------------------------------------------------------------------------------------------------------------------------------------------------------------------------------------------------------------|-----------------|
| Q15722 | [Leukotriene B4 receptor 1 (LTB4-R 1) (P2Y purinoceptor 7) (P2Y7), (Chemoattractant receptor-like 1) (G-protein coupled receptor 16).]                                                                                                                                                                                                          | Plasma Membrane |
| Q16832 | [Discoidin domain-containing receptor 2 precursor (EC 2.7.10.1), (Discoidin domain receptor 2) (Receptor protein-tyrosine kinase TKT), (Tyrosine-protein kinase TYRO10) (Neurotrophic tyrosine kinase,, receptor-related 3) (CD167b antigen).]                                                                                                  | Plasma Membrane |
| Q92839 | [Hyaluronan synthase 1 (EC 2.4.1.212) (Hyaluronate synthase 1), (Hyaluronic acid synthase 1) (HA synthase 1) (HuHAS1).]                                                                                                                                                                                                                         | Plasma Membrane |
| Q92932 | [Receptor-type tyrosine-protein phosphatase N2 precursor (EC 3.1.3.48), (R-PTP-N2) (Islet cell autoantigen-related protein) (ICAAR) (IAR), (Phogrin).]                                                                                                                                                                                          | Plasma Membrane |
| O94907 | [Dickkopf-related protein 1 precursor (Dkk-1) (Dickkopf-1) (hDkk-1), (SK).]                                                                                                                                                                                                                                                                     | Plasma Membrane |
| O95255 | [Multidrug resistance-associated protein 6 (ATP-binding cassette sub-, family C member 6) (Anthracycline resistance-associated protein), (Multi-specific organic anion transporter-E) (MOAT-E).]                                                                                                                                                | Plasma Membrane |
| O95858 | [Tetraspanin-15 (Tspan-15) (Transmembrane 4 superfamily member 15), (Tetraspan NET-7).]                                                                                                                                                                                                                                                         | Plasma Membrane |
| P25929 | Neuropeptide Y receptor type 1 (NPY1-R).                                                                                                                                                                                                                                                                                                        | Plasma Membrane |
| P26010 | Integrin beta-7 precursor.                                                                                                                                                                                                                                                                                                                      | Plasma Membrane |
| P01213 | [Beta-neoendorphin-dynorphin precursor (Proenkephalin B), (Preprodynorphin) [Contains: Alpha-neoendorphin; Beta-neoendorphin;, Big dynorphin (Big Dyn); Dynorphin A(1-17) (Dynorphin A) (Dyn-A17);, Dynorphin A(1-13); Dynorphin A(1-8); Leu-enkephalin; Rimorphin, (Dynorphin B) (Dyn-B) (Dynorphin B(1-13)); Leumorphin (Dynorphin B-, 29)].] | Plasma Membrane |
| P01733 | T-cell receptor beta chain V region YT35 precursor.                                                                                                                                                                                                                                                                                             | Plasma Membrane |
| P02748 | [Complement component C9 precursor [Contains: Complement component C9a;, Complement component C9b].]                                                                                                                                                                                                                                            | Plasma Membrane |
| P07333 | [Macrophage colony-stimulating factor 1 receptor precursor, (EC 2.7.10.1) (CSF-1-R) (Fms proto-oncogene) (c-fms) (CD115 antigen).]                                                                                                                                                                                                              | Plasma Membrane |
| P07359 | [Platelet glycoprotein Ib alpha chain precursor (Glycoprotein Ibalpha), (GP-Ib alpha) (GPIbA) (GPIb-alpha) (Antigen CD42b-alpha) (CD42b, antigen) [Contains: Glycocalicin].]                                                                                                                                                                    | Plasma Membrane |
| P21452 | [Substance-K receptor (SKR) (Neurokinin A receptor) (NK-2 receptor), (NK-2R) (Tachykinin receptor 2).]                                                                                                                                                                                                                                          | Plasma Membrane |
| P21860 | [Receptor tyrosine-protein kinase erbB-3 precursor (EC 2.7.10.1) (c-, erbB3) (Tyrosine kinase-type cell surface receptor HER3).]                                                                                                                                                                                                                | Plasma Membrane |
| P23467 | [Receptor-type tyrosine-protein phosphatase beta precursor, (EC 3.1.3.48) (Protein-tyrosine phosphatase beta) (R-PTP-beta).]                                                                                                                                                                                                                    | Plasma Membrane |
| P23471 | [Receptor-type tyrosine-protein phosphatase zeta precursor, (EC 3.1.3.48) (R-PTP-zeta).]                                                                                                                                                                                                                                                        | Plasma Membrane |
| P24071 | [Immunoglobulin alpha Fc receptor precursor (IgA Fc receptor) (CD89, antigen).]                                                                                                                                                                                                                                                                 | Plasma Membrane |
| P24530 | [Endothelin B receptor precursor (ET-B) (Endothelin receptor Non-, selective type).]                                                                                                                                                                                                                                                            | Plasma Membrane |
| P28476 | [Gamma-aminobutyric acid receptor subunit rho-2 precursor (GABA(A), receptor subunit rho-2).]                                                                                                                                                                                                                                                   | Plasma Membrane |
| P29279 | [Connective tissue growth factor precursor (Hypertrophic chondrocyte-, specific protein 24).]                                                                                                                                                                                                                                                   | Plasma Membrane |
| P29973 | [cGMP-gated cation channel alpha 1 (CNG channel alpha 1) (CNG-1) (CNG1), (Cyclic nucleotide-gated channel alpha 1) (Cyclic nucleotide-gated, channel, photoreceptor) (Cyclic nucleotide-gated cation channel 1), (Rod photoreceptor cGMP-gated channel subunit alpha).]                                                                         | Plasma Membrane |
| P30460 | [HLA class I histocompatibility antigen, B-8 alpha chain precursor (MHC, class I antigen B*8).]                                                                                                                                                                                                                                                 | Plasma Membrane |
| P32238 | [Cholecystokinin receptor type A (CCK-A receptor) (CCK-AR), (Cholecystokinin-1 receptor) (CCK1-R).]                                                                                                                                                                                                                                             | Plasma Membrane |
| P32248 | [C-C chemokine receptor type 7 precursor (C-C CKR-7) (CC-CKR-7) (CCR-7), (MIP-3 beta receptor) (EBV-induced G-protein coupled receptor 1), (EBI1) (BLR2) (CD197 antigen) (CDw197).]                                                                                                                                                             | Plasma Membrane |
| P34903 | [Gamma-aminobutyric acid receptor subunit alpha-3 precursor (GABA(A), receptor subunit alpha-3).]                                                                                                                                                                                                                                               | Plasma Membrane |
| P35232 | Prohibitin.                                                                                                                                                                                                                                                                                                                                     | Plasma Membrane |

|        |                                                                                                                                                                                                                                                                                                                                                                                                                                  |                 |
|--------|----------------------------------------------------------------------------------------------------------------------------------------------------------------------------------------------------------------------------------------------------------------------------------------------------------------------------------------------------------------------------------------------------------------------------------|-----------------|
| P35367 | Histamine H1 receptor.                                                                                                                                                                                                                                                                                                                                                                                                           | Plasma Membrane |
| P35968 | [Vascular endothelial growth factor receptor 2 precursor (EC 2.7.10.1), (VEGFR-2) (Kinase insert domain receptor) (Protein-tyrosine kinase, receptor Flk-1) (CD309 antigen).]                                                                                                                                                                                                                                                    | Plasma Membrane |
| P36888 | [FL cytokine receptor precursor (EC 2.7.10.1) (Tyrosine-protein kinase, receptor FLT3) (Stem cell tyrosine kinase 1) (STK-1) (CD135 antigen).]                                                                                                                                                                                                                                                                                   | Plasma Membrane |
| P36897 | [TGF-beta receptor type-1 precursor (EC 2.7.11.30) (TGF-beta receptor, type I) (TGFR-1) (TGF-beta type I receptor) (Transforming growth, factor-beta receptor type I) (TbetaR-I) (Serine/threonine-protein, kinase receptor R4) (SKR4) (Activin receptor-like kinase 5) (ALK-5).]                                                                                                                                                | Plasma Membrane |
| P38567 | [Hyaluronidase PH-20 precursor (EC 3.2.1.35) (Hyal-PH20) (Sperm surface, protein PH-20) (Sperm adhesion molecule 1).]                                                                                                                                                                                                                                                                                                            | Plasma Membrane |
| P40199 | [Carcinoembryonic antigen-related cell adhesion molecule 6 precursor, (Normal cross-reacting antigen) (Non-specific crossreacting antigen), (CD66c antigen).]                                                                                                                                                                                                                                                                    | Plasma Membrane |
| P41217 | OX-2 membrane glycoprotein precursor (CD200 antigen).                                                                                                                                                                                                                                                                                                                                                                            | Plasma Membrane |
| P78310 | [Coxsackievirus and adenovirus receptor precursor (Coxsackievirus B-, adenovirus receptor) (hCAR) (CVB3-binding protein) (HCVADR).]                                                                                                                                                                                                                                                                                              | Plasma Membrane |
| P78539 | Sushi repeat-containing protein SRPX precursor.                                                                                                                                                                                                                                                                                                                                                                                  | Plasma Membrane |
| Q00341 | [Vigilin (High density lipoprotein-binding protein) (HDL-binding, protein).]                                                                                                                                                                                                                                                                                                                                                     | Plasma Membrane |
| Q02094 | [Rhesus blood group-associated glycoprotein (Rhesus blood group-, associated ammonia channel) (Erythrocyte plasma membrane 50 kDa, glycoprotein) (Rh50A) (CD241 antigen).]                                                                                                                                                                                                                                                       | Plasma Membrane |
| Q02161 | [Blood group Rh(D) polypeptide (Rhesus D antigen) (RHXIII) (Rh, polypeptide 2) (RhPII) (CD240D antigen).]                                                                                                                                                                                                                                                                                                                        | Plasma Membrane |
| Q02246 | [Contactin-2 precursor (Axonin-1) (Axonal glycoprotein TAG-1), (Transient axonal glycoprotein 1) (TAX-1).]                                                                                                                                                                                                                                                                                                                       | Plasma Membrane |
| Q06418 | [Tyrosine-protein kinase receptor TYRO3 precursor (EC 2.7.10.1), (Tyrosine-protein kinase RSE) (Tyrosine-protein kinase SKY) (Tyrosine-, protein kinase DTK) (Protein-tyrosine kinase byk).]                                                                                                                                                                                                                                     | Plasma Membrane |
| Q07954 | [Prolow-density lipoprotein receptor-related protein 1 precursor (LRP), (Alpha-2-macroglobulin receptor) (A2MR) (Apolipoprotein E receptor), (APOER) (CD91 antigen) [Contains: Low-density lipoprotein receptor-, related protein 1 85 kDa subunit (LRP-85); Low-density lipoprotein, receptor-related protein 1 515 kDa subunit (LRP-515); Low-density, lipoprotein receptor-related protein 1 intracellular domain (LRPICD)].] | Plasma Membrane |
| Q08289 | [Voltage-dependent L-type calcium channel subunit beta-2 (CAB2), (Calcium channel voltage-dependent subunit beta 2) (Lambert-Eaton, myasthenic syndrome antigen B) (MYSB).]                                                                                                                                                                                                                                                      | Plasma Membrane |
| Q08554 | Desmocollin-1 precursor (Desmosomal glycoprotein 2/3) (DG2/DG3).                                                                                                                                                                                                                                                                                                                                                                 | Plasma Membrane |
| Q99677 | [Lysophosphatidic acid receptor 4 (LPA receptor 4) (LPA-4) (P2Y, purinoceptor 9) (P2Y9) (Purinergic receptor 9) (G-protein coupled, receptor 23) (P2Y5-like receptor).]                                                                                                                                                                                                                                                          | Plasma Membrane |
| Q99795 | Cell surface A33 antigen precursor (Glycoprotein A33).                                                                                                                                                                                                                                                                                                                                                                           | Plasma Membrane |
| Q9H158 | Protocadherin alpha C1 precursor (PCDH-alpha-C1).                                                                                                                                                                                                                                                                                                                                                                                | Plasma Membrane |
| Q9H1Y3 | Opsin-3 (Encephalopsin) (Panopsin).                                                                                                                                                                                                                                                                                                                                                                                              | Plasma Membrane |
| Q9NPA2 | [Matrix metalloproteinase-25 precursor (EC 3.4.24.-) (MMP-25), (Membrane-type matrix metalloproteinase 6) (MT-MMP 6) (Membrane-type-6, matrix metalloproteinase) (MT6-MMP) (Leukolysin).]                                                                                                                                                                                                                                        | Plasma Membrane |
| Q9UBC5 | [Myosin-1a (Brush border myosin I) (BBM-I) (BBMI) (Myosin I heavy, chain) (MIHC).]                                                                                                                                                                                                                                                                                                                                               | Plasma Membrane |
| Q9UII2 | ATPase inhibitor, mitochondrial precursor.                                                                                                                                                                                                                                                                                                                                                                                       | Plasma Membrane |
| Q9UL52 | [Transmembrane protease, serine 11E precursor (EC 3.4.21.-) (Serine, protease DESC1) [Contains: Transmembrane protease, serine 11E non-, catalytic chain; Transmembrane protease, serine 11E catalytic chain].]                                                                                                                                                                                                                  | Plasma Membrane |

|        |                                                                                                                                                                                                                                          |                 |
|--------|------------------------------------------------------------------------------------------------------------------------------------------------------------------------------------------------------------------------------------------|-----------------|
| Q9UL62 | Short transient receptor potential channel 5 (TrpC5) (Htrp-5) (Htrp5).                                                                                                                                                                   | Plasma Membrane |
| Q9UN88 | [Gamma-aminobutyric acid receptor subunit theta precursor (GABA(A), receptor subunit theta).]                                                                                                                                            | Plasma Membrane |
| Q9UQ49 | [Sialidase-3 (EC 3.2.1.18) (Membrane sialidase) (Ganglioside sialidase), (N-acetyl-alpha-neuraminidase 3).]                                                                                                                              | Plasma Membrane |
| Q9Y256 | [CAAX prenyl protease 2 (EC 3.4.22.-) (Prenyl protein-specific, endoprotease 2) (Farnesylated proteins-converting enzyme 2) (FACE-2), (hRCE1).]                                                                                          | Plasma Membrane |
| O00222 | Metabotropic glutamate receptor 8 precursor (mGluR8).                                                                                                                                                                                    | Plasma Membrane |
| O00624 | [Sodium-dependent phosphate transport protein 3 (Sodium/phosphate, cotransporter 3) (Na(+)/PI cotransporter 3) (Solute carrier family 17, member 2).]                                                                                    | Plasma Membrane |
| O14764 | [Gamma-aminobutyric acid receptor subunit delta precursor (GABA(A), receptor subunit delta).]                                                                                                                                            | Plasma Membrane |
| O14939 | [Phospholipase D2 (EC 3.1.4.4) (PLD 2) (Choline phosphatase 2), (Phosphatidylcholine-hydrolyzing phospholipase D2) (PLD1C) (hPLD2).]                                                                                                     | Plasma Membrane |
| O15078 | [Centrosomal protein Cep290 (Nephrocystin-6) (Tumor antigen se2-2), (Cancer/testis antigen 87) (CT87).]                                                                                                                                  | Plasma Membrane |
| O15303 | Metabotropic glutamate receptor 6 precursor (mGluR6).                                                                                                                                                                                    | Plasma Membrane |
| O15438 | [Canalicular multispecific organic anion transporter 2 (ATP-binding, cassette sub-family C member 3) (Multidrug resistance-associated, protein 3) (Multi-specific organic anion transporter-D) (MOAT-D).]                                | Plasma Membrane |
| O15529 | Putative G-protein coupled receptor 42.                                                                                                                                                                                                  | Plasma Membrane |
| O43187 | Interleukin-1 receptor-associated kinase-like 2 (IRAK-2).                                                                                                                                                                                | Plasma Membrane |
| O43614 | Orexin receptor type 2 (Ox2r) (Hypocretin receptor type 2).                                                                                                                                                                              | Plasma Membrane |
| O43808 | [Peroxisomal membrane protein PMP34 (34 kDa peroxisomal membrane, protein) (Solute carrier family 25 member 17).]                                                                                                                        | Plasma Membrane |
| O43847 | [Nardilysin precursor (EC 3.4.24.61) (N-arginine dibasic convertase), (NRD convertase) (NRD-C).]                                                                                                                                         | Plasma Membrane |
| O60266 | [Adenylate cyclase type 3 (EC 4.6.1.1) (Adenylate cyclase type III), (ATP pyrophosphate-lyase 3) (Adenylyl cyclase 3) (AC-III) (AC3), (Adenylate cyclase, olfactory type).]                                                              | Plasma Membrane |
| O75323 | Protein NipSnap2 (Glioblastoma amplified sequence).                                                                                                                                                                                      | Plasma Membrane |
| O75487 | Glypican-4 precursor (K-glypican).                                                                                                                                                                                                       | Plasma Membrane |
| P08183 | [Multidrug resistance protein 1 (EC 3.6.3.44) (ATP-binding cassette, sub-family B member 1) (P-glycoprotein 1) (CD243 antigen).]                                                                                                         | Plasma Membrane |
| P08473 | [Nepriylsin (EC 3.4.24.11) (Neutral endopeptidase) (NEP), (Enkephalinase) (Neutral endopeptidase 24.11) (Atriopeptidase) (Common, acute lymphocytic leukemia antigen) (CALLA) (CD10 antigen).]                                           | Plasma Membrane |
| P08514 | [Integrin alpha-IIb precursor (Platelet membrane glycoprotein IIb), (GPalpha IIb) (GPIIb) (CD41 antigen) [Contains: Integrin alpha-IIb, heavy chain; Integrin alpha-IIb light chain, form 1; Integrin alpha-, IIb light chain, form 2].] | Plasma Membrane |
| P08582 | [Melanotransferrin precursor (Melanoma-associated antigen p97) (CD228, antigen).]                                                                                                                                                        | Plasma Membrane |
| P08637 | [Low affinity immunoglobulin gamma Fc region receptor III-A precursor, (IgG Fc receptor III-2) (Fc-gamma RIII-alpha) (Fc-gamma RIIIa), (FcRIIIa) (Fc-gamma RIII) (FcRIII) (FcR-10) (CD16a antigen).]                                     | Plasma Membrane |
| P09326 | [CD48 antigen precursor (B-lymphocyte activation marker BLAST-1) (BCM1, surface antigen) (Leukocyte antigen MEM-102) (TCT.1).]                                                                                                           | Plasma Membrane |
| P10586 | [Receptor-type tyrosine-protein phosphatase F precursor (EC 3.1.3.48), (LAR protein) (Leukocyte antigen related).]                                                                                                                       | Plasma Membrane |
| P10912 | [Growth hormone receptor precursor (GH receptor) (Somatotropin, receptor) [Contains: Growth hormone-binding protein (GH-binding, protein) (GHBP) (Serum-binding protein).]                                                               | Plasma Membrane |
| P11215 | [Integrin alpha-M precursor (Cell surface glycoprotein MAC-1 subunit, alpha) (CR-3 alpha chain) (Leukocyte adhesion receptor MO1), (Neutrophil adherence receptor) (CD11b antigen).]                                                     | Plasma Membrane |
| P11279 | [Lysosome-associated membrane glycoprotein 1 precursor (LAMP-1) (CD107a, antigen).]                                                                                                                                                      | Plasma Membrane |



|        |                                                                                                                                                                                                                                                                                  |                 |
|--------|----------------------------------------------------------------------------------------------------------------------------------------------------------------------------------------------------------------------------------------------------------------------------------|-----------------|
| P13569 | [Cystic fibrosis transmembrane conductance regulator (CFTR) (cAMP-, dependent chloride channel) (ATP-binding cassette transporter sub-, family C member 7).]                                                                                                                     | Plasma Membrane |
| P13598 | Intercellular adhesion molecule 2 precursor (ICAM-2) (CD102 antigen).                                                                                                                                                                                                            | Plasma Membrane |
| P13746 | [HLA class I histocompatibility antigen, A-11 alpha chain precursor, (MHC class I antigen A*11).]                                                                                                                                                                                | Plasma Membrane |
| P14778 | [Interleukin-1 receptor type I precursor (IL-1R-1) (IL-1RT1) (IL-1R-, alpha) (p80) (CD121a antigen).]                                                                                                                                                                            | Plasma Membrane |
| P15391 | [B-lymphocyte antigen CD19 precursor (Differentiation antigen CD19) (B-, lymphocyte surface antigen B4) (Leu-12).]                                                                                                                                                               | Plasma Membrane |
| P16066 | [Atrial natriuretic peptide receptor A precursor (ANP-A) (ANPRA) (GC-A), (Guanylate cyclase) (EC 4.6.1.2) (NPR-A) (Atrial natriuretic peptide, A-type receptor).]                                                                                                                | Plasma Membrane |
| P16144 | Integrin beta-4 precursor (GP150) (CD104 antigen).                                                                                                                                                                                                                               | Plasma Membrane |
| P16671 | [Platelet glycoprotein 4 (Platelet glycoprotein IV) (GP1V), (Glycoprotein IIIb) (GPIIIB) (Leukocyte differentiation antigen CD36), (CD36 antigen) (PAS IV) (PAS-4 protein) (Platelet collagen receptor), (Fatty acid translocase) (FAT) (Thrombospondin receptor).]              | Plasma Membrane |
| P17301 | [Integrin alpha-2 precursor (Platelet membrane glycoprotein Ia) (GPIa), (Collagen receptor) (VLA-2 alpha chain) (CD49b antigen).]                                                                                                                                                | Plasma Membrane |
| P17813 | Endoglin precursor (CD105 antigen).                                                                                                                                                                                                                                              | Plasma Membrane |
| P17927 | [Complement receptor type 1 precursor (C3b/C4b receptor) (CD35, antigen).]                                                                                                                                                                                                       | Plasma Membrane |
| P20309 | Muscarinic acetylcholine receptor M3.                                                                                                                                                                                                                                            | Plasma Membrane |
| P41968 | Melanocortin receptor 3 (MC3-R).                                                                                                                                                                                                                                                 | Plasma Membrane |
| P42261 | [Glutamate receptor 1 precursor (GluR-1) (GluR-A) (GluR-K1) (Glutamate, receptor ionotropic, AMPA 1) (AMPA-selective glutamate receptor 1).]                                                                                                                                     | Plasma Membrane |
| P42701 | [Interleukin-12 receptor beta-1 chain precursor (IL-12R-beta1), (Interleukin-12 receptor beta) (IL-12 receptor beta component) (IL-, 12RB1) (CD212 antigen).]                                                                                                                    | Plasma Membrane |
| P43626 | [Killer cell immunoglobulin-like receptor 2DL1 precursor (MHC class I, NK cell receptor) (Natural killer-associated transcript 1) (NKAT-1), (p58 natural killer cell receptor clones CL-42/47.11) (p58 NK, receptor) (p58.1 MHC class-I-specific NK receptor) (CD158a antigen).] | Plasma Membrane |
| P46098 | [5-hydroxytryptamine receptor 3 precursor (5-HT-3) (Serotonin-gated ion, channel receptor) (5-HT3R).]                                                                                                                                                                            | Plasma Membrane |
| P48058 | [Glutamate receptor 4 precursor (GluR-4) (GluR4) (GluR-D) (Glutamate, receptor ionotropic, AMPA 4) (AMPA-selective glutamate receptor 4).]                                                                                                                                       | Plasma Membrane |
| P48167 | [Glycine receptor subunit beta precursor (Glycine receptor 58 kDa, subunit).]                                                                                                                                                                                                    | Plasma Membrane |
| P48664 | [Excitatory amino acid transporter 4 (Solute carrier family 1 member 6), (Sodium-dependent glutamate/aspartate transporter).]                                                                                                                                                    | Plasma Membrane |
| P48960 | [CD97 antigen precursor (Leukocyte antigen CD97) [Contains: CD97, antigen subunit alpha; CD97 antigen subunit beta].]                                                                                                                                                            | Plasma Membrane |
| P50395 | [Rab GDP dissociation inhibitor beta (Rab GDI beta) (Guanosine, diphosphate dissociation inhibitor 2) (GDI-2).]                                                                                                                                                                  | Plasma Membrane |
| P51170 | [Amiloride-sensitive sodium channel subunit gamma (Epithelial Na+), channel subunit gamma) (Gamma-ENaC) (Nonvoltage-gated sodium channel 1, subunit gamma) (SCNEG) (Gamma-NaCH).]                                                                                                | Plasma Membrane |
| P51512 | [Matrix metalloproteinase-16 precursor (EC 3.4.24.-) (MMP-16), (Membrane-type matrix metalloproteinase 3) (MT-MMP 3) (MTMMP3), (Membrane-type-3 matrix metalloproteinase) (MT3-MMP) (MT3MMP) (MMP-, X2).]                                                                        | Plasma Membrane |
| P51582 | P2Y purinoceptor 4 (P2Y4) (Uridine nucleotide receptor) (UNR) (P2P).                                                                                                                                                                                                             | Plasma Membrane |
| P51677 | [C-C chemokine receptor type 3 (C-C CKR-3) (CC-CKR-3) (CCR-3) (CCR3), (CKR3) (Eosinophil eotaxin receptor) (CD193 antigen).]                                                                                                                                                     | Plasma Membrane |
| P51828 | [Adenylyl cyclase type 7 (EC 4.6.1.1) (Adenylyl cyclase type VII), (ATP pyrophosphate-lyase 7) (Adenylyl cyclase 7).]                                                                                                                                                            | Plasma Membrane |
| P54753 | [Ephrin type-B receptor 3 precursor (EC 2.7.10.1) (Tyrosine-protein, kinase receptor HEK-2) (Tyrosine-protein kinase TYRO6).]                                                                                                                                                    | Plasma Membrane |
| P54762 | [Ephrin type-B receptor 1 precursor (EC 2.7.10.1) (Tyrosine-protein, kinase receptor EPH-2) (NET) (HEK6) (ELK).]                                                                                                                                                                 | Plasma Membrane |

|        |                                                                                                                                                                                                      |                 |
|--------|------------------------------------------------------------------------------------------------------------------------------------------------------------------------------------------------------|-----------------|
| P55196 | Afadin (Protein AF-6).                                                                                                                                                                               | Plasma Membrane |
| P55291 | Cadherin-15 precursor (Muscle cadherin) (M-cadherin) (Cadherin-14).                                                                                                                                  | Plasma Membrane |
| Q13507 | Short transient receptor potential channel 3 (TrpC3) (Htrp-3) (Htrp3).                                                                                                                               | Plasma Membrane |
| Q13705 | [Activin receptor type-2B precursor (EC 2.7.11.30) (Activin receptor, type IIB) (ACTR-IIB).]                                                                                                         | Plasma Membrane |
| Q13796 | Protein Shroom2 (Apical-like protein) (Protein APXL).                                                                                                                                                | Plasma Membrane |
| Q14517 | [Cadherin-related tumor suppressor homolog precursor (Protein fat, homolog).]                                                                                                                        | Plasma Membrane |
| Q14574 | Desmocollin-3 precursor (Desmocollin-4) (HT-CP).                                                                                                                                                     | Plasma Membrane |
| Q15109 | [Advanced glycosylation end product-specific receptor precursor, (Receptor for advanced glycosylation end products).]                                                                                | Plasma Membrane |
| Q15303 | [Receptor tyrosine-protein kinase erbB-4 precursor (EC 2.7.10.1), (p180erbB4) (Tyrosine kinase-type cell surface receptor HER4).]                                                                    | Plasma Membrane |
| Q15390 | [Mitochondrial fission regulator 1 (Chondrocyte protein with a poly-, proline region).]                                                                                                              | Plasma Membrane |
| Q15760 | Probable G-protein coupled receptor 19 (GPR-NGA).                                                                                                                                                    | Plasma Membrane |
| Q16445 | [Gamma-aminobutyric acid receptor subunit alpha-6 precursor (GABA(A), receptor subunit alpha-6).]                                                                                                    | Plasma Membrane |
| Q16602 | [Calcitonin gene-related peptide type 1 receptor precursor (CGRP type 1, receptor) (Calcitonin receptor-like receptor).]                                                                             | Plasma Membrane |
| Q16625 | Occludin.                                                                                                                                                                                            | Plasma Membrane |
| Q16653 | Myelin-oligodendrocyte glycoprotein precursor.                                                                                                                                                       | Plasma Membrane |
| Q16849 | [Receptor-type tyrosine-protein phosphatase-like N precursor (R-PTP-N), (PTP IA-2) (Islet cell antigen 512) (ICA 512) (Islet cell autoantigen, 3).]                                                  | Plasma Membrane |
| O95258 | [Brain mitochondrial carrier protein 1 (BMCP-1) (Mitochondrial, uncoupling protein 5) (UCP 5) (Solute carrier family 25 member 14).]                                                                 | Plasma Membrane |
| P01848 | T-cell receptor alpha chain C region.                                                                                                                                                                | Plasma Membrane |
| P03979 | T-cell receptor gamma chain V region PT-gamma-1/2 precursor.                                                                                                                                         | Plasma Membrane |
| P04435 | T-cell receptor beta chain V region CTL-L17 precursor.                                                                                                                                               | Plasma Membrane |
| P05107 | [Integrin beta-2 precursor (Cell surface adhesion glycoproteins LFA-, 1/CR3/p150,95 subunit beta) (Complement receptor C3 subunit beta), (CD18 antigen).]                                            | Plasma Membrane |
| P06340 | [HLA class II histocompatibility antigen, DO alpha chain precursor (MHC, class II antigen DOA) (MHC DZ alpha) (MHC DN-alpha).]                                                                       | Plasma Membrane |
| P07510 | Acetylcholine receptor subunit gamma precursor.                                                                                                                                                      | Plasma Membrane |
| P21709 | [Ephrin type-A receptor 1 precursor (EC 2.7.10.1) (Tyrosine-protein, kinase receptor EPH).]                                                                                                          | Plasma Membrane |
| P21802 | [Fibroblast growth factor receptor 2 precursor (EC 2.7.10.1) (FGFR-2), (Keratinocyte growth factor receptor 2) (CD332 antigen).]                                                                     | Plasma Membrane |
| P21817 | [Ryanodine receptor 1 (Skeletal muscle-type ryanodine receptor) (RyR1), (RYR-1) (Skeletal muscle calcium release channel).]                                                                          | Plasma Membrane |
| P22681 | [E3 ubiquitin-protein ligase CBL (EC 6.3.2.-) (Signal transduction, protein CBL) (Proto-oncogene c-CBL) (Casitas B-lineage lymphoma proto-, oncogene) (RING finger protein 55).]                     | Plasma Membrane |
| P22897 | Macrophage mannose receptor 1 precursor (MMR) (CD206 antigen).                                                                                                                                       | Plasma Membrane |
| P23415 | [Glycine receptor subunit alpha-1 precursor (Glycine receptor 48 kDa, subunit) (Glycine receptor strychnine-binding subunit).]                                                                       | Plasma Membrane |
| P23634 | [Plasma membrane calcium-transporting ATPase 4 (EC 3.6.3.8) (PMCA4), (Plasma membrane calcium pump isoform 4) (Plasma membrane calcium, ATPase isoform 4) (Matrix-remodeling-associated protein 1).] | Plasma Membrane |
| P28223 | [5-hydroxytryptamine receptor 2A (5-HT-2A) (Serotonin receptor 2A) (5-, HT-2).]                                                                                                                      | Plasma Membrane |
| P28566 | [5-hydroxytryptamine receptor 1E (5-HT-1E) (Serotonin receptor 1E) (5-, HT1E) (S31).]                                                                                                                | Plasma Membrane |
| P29317 | [Ephrin type-A receptor 2 precursor (EC 2.7.10.1) (Tyrosine-protein, kinase receptor ECK) (Epithelial cell kinase).]                                                                                 | Plasma Membrane |

|        |                                                                                                                                                                                                                   |                 |
|--------|-------------------------------------------------------------------------------------------------------------------------------------------------------------------------------------------------------------------|-----------------|
| P29353 | [SHC-transforming protein 1 (SH2 domain protein C1) (Src homology 2, domain-containing-transforming protein C1).]                                                                                                 | Plasma Membrane |
| P29376 | [Leukocyte tyrosine kinase receptor precursor (EC 2.7.10.1) (Protein, tyrosine kinase 1).]                                                                                                                        | Plasma Membrane |
| P30273 | [High affinity immunoglobulin epsilon receptor subunit gamma precursor, (FcεRI gamma) (IgE Fc receptor subunit gamma) (Fc-epsilon RI-gamma).]                                                                     | Plasma Membrane |
| P30530 | [Tyrosine-protein kinase receptor UFO precursor (EC 2.7.10.1) (AXL, oncogene).]                                                                                                                                   | Plasma Membrane |
| P30954 | [Olfactory receptor 10J1 (Olfactory receptor OR1-26) (Olfactory, receptor-like protein HGMP07J).]                                                                                                                 | Plasma Membrane |
| P32241 | [Vasoactive intestinal polypeptide receptor 1 precursor (VIP-R-1), (Pituitary adenylate cyclase-activating polypeptide type II receptor), (PACAP type II receptor) (PACAP-R-2).]                                  | Plasma Membrane |
| P32745 | Somatostatin receptor type 3 (SS3R) (SSR-28).                                                                                                                                                                     | Plasma Membrane |
| P33527 | [Multidrug resistance-associated protein 1 (ATP-binding cassette sub-, family C member 1) (Leukotriene C(4) transporter) (LTC4 transporter).]                                                                     | Plasma Membrane |
| P34910 | [EVI2B protein precursor (Ecotropic viral integration site 2B protein, homolog) (EVI-2B).]                                                                                                                        | Plasma Membrane |
| P34981 | [Thyrotropin-releasing hormone receptor (TRH-R) (Thyroliberin, receptor).]                                                                                                                                        | Plasma Membrane |
| P35368 | [Alpha-1B adrenergic receptor (Alpha 1B-adrenoceptor) (Alpha 1B-, adrenoceptor).]                                                                                                                                 | Plasma Membrane |
| P35670 | [Copper-transporting ATPase 2 (EC 3.6.3.4) (Copper pump 2) (Wilson, disease-associated protein) [Contains: WND/140 kDa].]                                                                                         | Plasma Membrane |
| P36383 | Gap junction alpha-7 protein (Connexin-45) (Cx45).                                                                                                                                                                | Plasma Membrane |
| P38570 | [Integrin alpha-E precursor (Mucosal lymphocyte 1 antigen) (HML-1, antigen) (Integrin alpha-IEL) (CD103 antigen) [Contains: Integrin, alpha-E light chain; Integrin alpha-E heavy chain].]                        | Plasma Membrane |
| P40200 | [T-cell surface protein tactile precursor (T cell-activated increased, late expression protein) (CD96 antigen).]                                                                                                  | Plasma Membrane |
| P40238 | [Thrombopoietin receptor precursor (TPO-R) (Myeloproliferative leukemia, protein) (C-mpl) (CD110 antigen).]                                                                                                       | Plasma Membrane |
| P41143 | Delta-type opioid receptor (DOR-1).                                                                                                                                                                               | Plasma Membrane |
| P41231 | [P2Y purinoceptor 2 (P2Y2) (P2U purinoceptor 1) (P2U1) (ATP receptor), (Purinergic receptor).]                                                                                                                    | Plasma Membrane |
| P41440 | [Folate transporter 1 (Solute carrier family 19 member 1) (Placental, folate transporter) (FOLT) (Reduced folate carrier protein) (RFC), (Intestinal folate carrier) (IFC-1).]                                    | Plasma Membrane |
| P60893 | [Probable G-protein coupled receptor 85 (Super conserved receptor, expressed in brain 2).]                                                                                                                        | Plasma Membrane |
| Q00013 | [55 kDa erythrocyte membrane protein (p55) (Membrane protein,, palmitoylated 1).]                                                                                                                                 | Plasma Membrane |
| Q02763 | [Angiopoietin-1 receptor precursor (EC 2.7.10.1) (Tyrosine-protein, kinase receptor TIE-2) (hTIE2) (Tyrosine-protein kinase receptor TEK), (p140 TEK) (Tunica interna endothelial cell kinase) (CD202b antigen).] | Plasma Membrane |
| Q02846 | [Retinal guanylyl cyclase 1 precursor (EC 4.6.1.2) (Guanylate cyclase, 2D, retinal) (RETGC-1) (Rod outer segment membrane guanylate cyclase), (ROS-GC).]                                                          | Plasma Membrane |
| Q02978 | [Mitochondrial 2-oxoglutarate/malate carrier protein (OGCP) (Solute, carrier family 25 member 11).]                                                                                                               | Plasma Membrane |
| Q04656 | [Copper-transporting ATPase 1 (EC 3.6.3.4) (Copper pump 1) (Menkes, disease-associated protein).]                                                                                                                 | Plasma Membrane |
| Q07157 | [Tight junction protein ZO-1 (Zonula occludens protein 1) (Zona, occludens protein 1) (Tight junction protein 1).]                                                                                                | Plasma Membrane |
| Q12816 | Trophinin (MAGE-D3 antigen).                                                                                                                                                                                      | Plasma Membrane |
| Q13255 | Metabotropic glutamate receptor 1 precursor (mGluR1).                                                                                                                                                             | Plasma Membrane |
| Q99250 | [Sodium channel protein type 2 subunit alpha (Sodium channel protein, type II subunit alpha) (Voltage-gated sodium channel subunit alpha, Nav1.2) (Sodium channel protein, brain II subunit alpha) (HBSC II).]    | Plasma Membrane |
| Q99665 | [Interleukin-12 receptor beta-2 chain precursor (IL-12 receptor beta-2), (IL-12R-beta2).]                                                                                                                         | Plasma Membrane |
| Q99680 | Probable G-protein coupled receptor 22.                                                                                                                                                                           | Plasma Membrane |

|        |                                                                                                                                                                                                                                   |                 |
|--------|-----------------------------------------------------------------------------------------------------------------------------------------------------------------------------------------------------------------------------------|-----------------|
| Q99719 | [Septin-5 (Peanut-like protein 1) (Cell division control-related, protein 1) (CDCrel-1).]                                                                                                                                         | Plasma Membrane |
| Q99884 | [Sodium-dependent proline transporter (Solute carrier family 6 member, 7).]                                                                                                                                                       | Plasma Membrane |
| Q9NRY6 | [Phospholipid scramblase 3 (PL scramblase 3) (Ca(2+)-dependent, phospholipid scramblase 3).]                                                                                                                                      | Plasma Membrane |
| Q9UHE8 | [Metalloreductase STEAP1 (EC 1.16.1.-) (Six-transmembrane epithelial, antigen of prostate 1).]                                                                                                                                    | Plasma Membrane |
| Q9UKF5 | [ADAM 29 precursor (A disintegrin and metalloproteinase domain 29), (Cancer/testis antigen 73) (CT73).]                                                                                                                           | Plasma Membrane |
| Q9UKU6 | [Thyrotropin-releasing hormone-degrading ectoenzyme (EC 3.4.19.6) (TRH-, degrading ectoenzyme) (TRH-DE) (TRH-specific aminopeptidase), (Thyroliberinase) (Pyroglutamyl-peptidase II) (PAP-II).]                                   | Plasma Membrane |
| Q9UPC5 | Probable G-protein coupled receptor 34.                                                                                                                                                                                           | Plasma Membrane |
| P05455 | [Lupus La protein (Sjogren syndrome type B antigen) (SS-B) (La, ribonucleoprotein) (La autoantigen).]                                                                                                                             | Protein Complex |
| O14818 | [Proteasome subunit alpha type-7 (EC 3.4.25.1) (Proteasome subunit RC6-, 1) (Proteasome subunit XAPC7).]                                                                                                                          | Protein Complex |
| O15145 | [Actin-related protein 2/3 complex subunit 3 (ARP2/3 complex 21 kDa, subunit) (p21-ARC).]                                                                                                                                         | Protein Complex |
| O15372 | [Eukaryotic translation initiation factor 3 subunit 3 (eIF-3 gamma), (eIF3 p40 subunit) (eIF3h).]                                                                                                                                 | Protein Complex |
| O75426 | F-box only protein 24.                                                                                                                                                                                                            | Protein Complex |
| O75817 | [Ribonuclease P protein subunit p20 (EC 3.1.26.5) (RNaseP protein p20), (hPOP7).]                                                                                                                                                 | Protein Complex |
| P07942 | Laminin subunit beta-1 precursor (Laminin B1 chain).                                                                                                                                                                              | Protein Complex |
| P08476 | [Inhibin beta A chain precursor (Activin beta-A chain) (Erythroid, differentiation protein) (EDF).]                                                                                                                               | Protein Complex |
| P12829 | [Myosin light polypeptide 4 (Myosin light chain 1, embryonic, muscle/atrial isoform) (Myosin light chain alkali, GT-1 isoform).]                                                                                                  | Protein Complex |
| P13489 | [Ribonuclease inhibitor (Ribonuclease/angiogenin inhibitor 1) (RAI), (Placental ribonuclease inhibitor) (RNase inhibitor) (RI).]                                                                                                  | Protein Complex |
| P17302 | [Gap junction alpha-1 protein (Connexin-43) (Cx43) (Gap junction 43 kDa, heart protein).]                                                                                                                                         | Protein Complex |
| P46019 | [Phosphorylase b kinase regulatory subunit alpha, liver isoform, (Phosphorylase kinase alpha L subunit).]                                                                                                                         | Protein Complex |
| P51587 | [Breast cancer type 2 susceptibility protein (Fanconi anemia group D1, protein).]                                                                                                                                                 | Protein Complex |
| P54707 | [Potassium-transporting ATPase alpha chain 2 (EC 3.6.3.10) (Proton, pump) (Non-gastric H(+)/K(+) ATPase subunit alpha).]                                                                                                          | Protein Complex |
| P55884 | [Eukaryotic translation initiation factor 3 subunit 9 (eIF-3-eta) (eIF3, p116) (eIF3 p110) (eIF3b) (Prt1 homolog) (hPrt1).]                                                                                                       | Protein Complex |
| Q13454 | Tumor suppressor candidate 3 (Protein N33).                                                                                                                                                                                       | Protein Complex |
| Q14152 | [Eukaryotic translation initiation factor 3 subunit 10 (eIF-3-theta), (eIF3 p167) (eIF3 p180) (eIF3 p185) (eIF3a).]                                                                                                               | Protein Complex |
| P01730 | [T-cell surface glycoprotein CD4 precursor (T-cell surface antigen, T4/Leu-3).]                                                                                                                                                   | Protein Complex |
| P02675 | Fibrinogen beta chain precursor [Contains: Fibrinopeptide B].                                                                                                                                                                     | Protein Complex |
| P04843 | [Dolichyl-diphosphooligosaccharide--protein glycosyltransferase 67 kDa, subunit precursor (EC 2.4.1.119) (Ribophorin I) (RPN-I).]                                                                                                 | Protein Complex |
| P05538 | HLA class II histocompatibility antigen, DX beta chain precursor.                                                                                                                                                                 | Protein Complex |
| P23921 | [Ribonucleoside-diphosphate reductase large subunit (EC 1.17.4.1), (Ribonucleoside-diphosphate reductase subunit M1) (Ribonucleotide, reductase large chain).]                                                                    | Protein Complex |
| P28065 | [Proteasome subunit beta type-9 precursor (EC 3.4.25.1) (Proteasome, subunit beta-1i) (Proteasome chain 7) (Macropain chain 7), (Multicatalytic endopeptidase complex chain 7) (RING12 protein) (Low, molecular mass protein 2).] | Protein Complex |
| P28072 | [Proteasome subunit beta type-6 precursor (EC 3.4.25.1) (Proteasome, delta chain) (Macropain delta chain) (Multicatalytic endopeptidase, complex delta chain) (Proteasome subunit Y).]                                            | Protein Complex |
| P29459 | [Interleukin-12 subunit alpha precursor (IL-12A) (IL-12 subunit p35), (Cytotoxic lymphocyte maturation factor 35 kDa subunit) (CLMF p35) (NK, cell stimulatory factor chain 1) (NKSF1).]                                          | Protein Complex |
| P31321 | cAMP-dependent protein kinase type I-beta regulatory subunit.                                                                                                                                                                     | Protein Complex |

|        |                                                                                                                                                                                                                                                                                                                                                                          |                 |
|--------|--------------------------------------------------------------------------------------------------------------------------------------------------------------------------------------------------------------------------------------------------------------------------------------------------------------------------------------------------------------------------|-----------------|
| P38398 | Breast cancer type 1 susceptibility protein (RING finger protein 53).                                                                                                                                                                                                                                                                                                    | Protein Complex |
| P60660 | [Myosin light polypeptide 6 (Smooth muscle and nonmuscle myosin light, chain alkali 6) (Myosin light chain alkali 3) (Myosin light chain 3), (MLC-3) (LC17).]                                                                                                                                                                                                            | Protein Complex |
| P61353 | 60S ribosomal protein L27.                                                                                                                                                                                                                                                                                                                                               | Protein Complex |
| P61966 | [AP-1 complex subunit sigma-1A (Adapter-related protein complex 1, sigma-1A subunit) (Sigma-adaptin 1A) (Adaptor protein complex AP-1, sigma-1A subunit) (Golgi adaptor HA1/AP1 adaptin sigma-1A subunit), (Clathrin assembly protein complex 1 sigma-1A small chain) (Clathrin, coat assembly protein AP19) (HA1 19 kDa subunit) (Sigma 1a subunit of, AP-1 clathrin).] | Protein Complex |
| P62829 | 60S ribosomal protein L23 (Ribosomal protein L17).                                                                                                                                                                                                                                                                                                                       | Protein Complex |
| P68036 | [Ubiquitin-conjugating enzyme E2 L3 (EC 6.3.2.19) (Ubiquitin-protein, ligase L3) (Ubiquitin carrier protein L3) (UbcH7) (E2-F1) (L-UBC).]                                                                                                                                                                                                                                | Protein Complex |
| P68871 | [Hemoglobin subunit beta (Hemoglobin beta chain) (Beta-globin), [Contains: LVV-hemorphin-7].]                                                                                                                                                                                                                                                                            | Protein Complex |
| P69905 | Hemoglobin subunit alpha (Hemoglobin alpha chain) (Alpha-globin).                                                                                                                                                                                                                                                                                                        | Protein Complex |
| P78552 | [Interleukin-13 receptor alpha-1 chain precursor (IL-13R-alpha-1) (IL-, 13RA-1) (Cancer/testis antigen 19) (CT19) (CD213a1 antigen).]                                                                                                                                                                                                                                    | Protein Complex |
| Q12840 | [Kinesin heavy chain isoform 5A (Neuronal kinesin heavy chain) (NKHC), (Kinesin heavy chain neuron-specific 1).]                                                                                                                                                                                                                                                         | Protein Complex |
| Q13326 | [Gamma-sarcoglycan (Gamma-SG) (35 kDa dystrophin-associated, glycoprotein) (35DAG).]                                                                                                                                                                                                                                                                                     | Protein Complex |
| Q13347 | [Eukaryotic translation initiation factor 3 subunit 2 (eIF-3-beta), (eIF3 p36) (eIF3i) (TGF-beta receptor-interacting protein 1) (TRIP-1).]                                                                                                                                                                                                                              | Protein Complex |
| Q92993 | [Histone acetyltransferase HTATIP (EC 2.3.1.48) (EC 2.3.1.-) (60 kDa, Tat interactive protein) (Tip60) (HIV-1 Tat interactive protein), (cPLA(2)-interacting protein).]                                                                                                                                                                                                  | Protein Complex |
| Q93074 | [Mediator of RNA polymerase II transcription subunit 12 (Thyroid, hormone receptor-associated protein complex 230 kDa component), (Trap230) (Activator-recruited cofactor 240 kDa component) (ARC240), (CAG repeat protein 45) (OPA-containing protein) (Trinucleotide, repeat-containing gene 11 protein).]                                                             | Protein Complex |
| Q99728 | BRCA1-associated RING domain protein 1 (BARD-1).                                                                                                                                                                                                                                                                                                                         | Protein Complex |
| Q99759 | [Mitogen-activated protein kinase kinase kinase 3 (EC 2.7.11.25), (MAPK/ERK kinase kinase 3) (MEK kinase 3) (MEKK 3).]                                                                                                                                                                                                                                                   | Protein Complex |
| Q9UK97 | [F-box only protein 9 (Cross-immune reaction antigen 1) (Renal, carcinoma antigen NY-REN-57).]                                                                                                                                                                                                                                                                           | Protein Complex |
| Q9UKB1 | [F-box/WD repeat-containing protein 11 (F-box/WD repeat-containing, protein 1B) (F-box and WD repeats protein beta-TrCP2).]                                                                                                                                                                                                                                              | Protein Complex |
| Q9UL18 | [Eukaryotic translation initiation factor 2C 1 (eIF2C 1) (eIF-2C 1), (Argonaute-1) (Putative RNA-binding protein Q99).]                                                                                                                                                                                                                                                  | Protein Complex |
| O00566 | [U3 small nucleolar ribonucleoprotein protein MPP10 (M phase, phosphoprotein 10).]                                                                                                                                                                                                                                                                                       | Protein Complex |
| O15169 | Axin-1 (Axis inhibition protein 1) (hAxin).                                                                                                                                                                                                                                                                                                                              | Protein Complex |
| O15511 | [Actin-related protein 2/3 complex subunit 5 (ARP2/3 complex 16 kDa, subunit) (p16-ARC).]                                                                                                                                                                                                                                                                                | Protein Complex |
| O60282 | [Kinesin heavy chain isoform 5C (Kinesin heavy chain neuron-specific, 2).]                                                                                                                                                                                                                                                                                               | Protein Complex |
| O75818 | [Ribonuclease P protein subunit p40 (EC 3.1.26.5) (RNaseP protein p40), (RNase P subunit 1).]                                                                                                                                                                                                                                                                            | Protein Complex |
| P07992 | DNA excision repair protein ERCC-1.                                                                                                                                                                                                                                                                                                                                      | Protein Complex |
| P10644 | [cAMP-dependent protein kinase type I-alpha regulatory subunit (Tissue-, specific extinguisher 1) (TSE1).]                                                                                                                                                                                                                                                               | Protein Complex |
| P11047 | Laminin subunit gamma-1 precursor (Laminin B2 chain).                                                                                                                                                                                                                                                                                                                    | Protein Complex |
| P11277 | Spectrin beta chain, erythrocyte (Beta-I spectrin).                                                                                                                                                                                                                                                                                                                      | Protein Complex |
| P13533 | [Myosin-6 (Myosin heavy chain 6) (Myosin heavy chain, cardiac muscle, alpha isoform) (MyHC-alpha).]                                                                                                                                                                                                                                                                      | Protein Complex |

|        |                                                                                                                                                                                                                                                                                                                  |                 |
|--------|------------------------------------------------------------------------------------------------------------------------------------------------------------------------------------------------------------------------------------------------------------------------------------------------------------------|-----------------|
| P19474 | [52 kDa Ro protein (Sjogren syndrome type A antigen) (SS-A) (Ro(SS-A)), (52 kDa ribonucleoprotein autoantigen Ro/SS-A) (Tripartite motif-, containing protein 21) (RING finger protein 81).]                                                                                                                     | Protein Complex |
| P20585 | [DNA mismatch repair protein Msh3 (Divergent upstream protein) (DUP), (Mismatch repair protein 1) (MRP1).]                                                                                                                                                                                                       | Protein Complex |
| P43246 | DNA mismatch repair protein Msh2 (MutS protein homolog 2).                                                                                                                                                                                                                                                       | Protein Complex |
| P45379 | Troponin T, cardiac muscle (TnTc) (Cardiac muscle troponin T) (cTnT).                                                                                                                                                                                                                                            | Protein Complex |
| P51617 | Interleukin-1 receptor-associated kinase 1 (EC 2.7.11.1) (IRAK-1).                                                                                                                                                                                                                                               | Protein Complex |
| P51665 | [26S proteasome non-ATPase regulatory subunit 7 (26S proteasome, regulatory subunit rpn8) (26S proteasome regulatory subunit S12), (Proteasome subunit p40) (Mov34 protein homolog).]                                                                                                                            | Protein Complex |
| P52701 | [DNA mismatch repair protein MSH6 (MutS-alpha 160 kDa subunit) (G/T, mismatch-binding protein) (GTBP) (GTMBP) (p160).]                                                                                                                                                                                           | Protein Complex |
| P53396 | [ATP-citrate synthase (EC 2.3.3.8) (ATP-citrate (pro-S-)-lyase), (Citrate cleavage enzyme).]                                                                                                                                                                                                                     | Protein Complex |
| Q92889 | [DNA repair endonuclease XPF (EC 3.1.-.-) (DNA excision repair protein, ERCC-4) (DNA-repair protein complementing XP-F cells) (Xeroderma, pigmentosum group F-complementing protein).]                                                                                                                           | Protein Complex |
| Q92901 | 60S ribosomal protein L3-like.                                                                                                                                                                                                                                                                                   | Protein Complex |
| O95782 | [AP-2 complex subunit alpha-1 (Adapter-related protein complex 2 alpha-, 1 subunit) (Alpha-adaptin A) (Adaptor protein complex AP-2 alpha-1, subunit) (Clathrin assembly protein complex 2 alpha-A large chain), (100 kDa coated vesicle protein A) (Plasma membrane adaptor HA2/AP2, adaptin alpha A subunit).] | Protein Complex |
| P25391 | Laminin subunit alpha-1 precursor (Laminin A chain).                                                                                                                                                                                                                                                             | Protein Complex |
| P02679 | Fibrinogen gamma chain precursor.                                                                                                                                                                                                                                                                                | Protein Complex |
| P04844 | [Dolichyl-diphosphooligosaccharide--protein glycosyltransferase 63 kDa, subunit precursor (EC 2.4.1.119) (Ribophorin II) (RPN-II) (RIBIIR).]                                                                                                                                                                     | Protein Complex |
| P23434 | Glycine cleavage system H protein, mitochondrial precursor.                                                                                                                                                                                                                                                      | Protein Complex |
| P23588 | Eukaryotic translation initiation factor 4B (eIF-4B).                                                                                                                                                                                                                                                            | Protein Complex |
| P24386 | [Rab proteins geranylgeranyltransferase component A 1 (Rab escort, protein 1) (REP-1) (Choroideaemia protein) (TCD protein).]                                                                                                                                                                                    | Protein Complex |
| P27986 | [Phosphatidylinositol 3-kinase regulatory subunit alpha (PI3-kinase p85, subunit alpha) (PtdIns-3-kinase p85-alpha) (PI3K).]                                                                                                                                                                                     | Protein Complex |
| P28066 | [Proteasome subunit alpha type-5 (EC 3.4.25.1) (Proteasome zeta chain), (Macropain zeta chain) (Multicatalytic endopeptidase complex zeta, chain).]                                                                                                                                                              | Protein Complex |
| P30679 | [Guanine nucleotide-binding protein alpha-15 subunit (G alpha-15) (G, alpha-16).]                                                                                                                                                                                                                                | Protein Complex |
| P32969 | 60S ribosomal protein L9.                                                                                                                                                                                                                                                                                        | Protein Complex |
| P33176 | Kinesin heavy chain (Ubiquitous kinesin heavy chain) (UKHC).                                                                                                                                                                                                                                                     | Protein Complex |
| P36543 | [Vacuolar ATP synthase subunit E 1 (EC 3.6.3.14) (V-ATPase subunit E 1), (Vacuolar proton pump subunit E 1) (V-ATPase 31 kDa subunit) (P31).]                                                                                                                                                                    | Protein Complex |
| P60228 | [Eukaryotic translation initiation factor 3 subunit 6 (eIF-3 p48), (eIF3e) (Viral integration site protein INT-6 homolog).]                                                                                                                                                                                      | Protein Complex |
| P60661 | [Myosin light polypeptide 6 (Myosin light chain alkali 3) (Myosin light, chain 3) (MLC-3) (LC17).]                                                                                                                                                                                                               | Protein Complex |
| P60842 | [Eukaryotic initiation factor 4A-I (EC 3.6.1.-) (ATP-dependent RNA, helicase eIF4A-1) (eIF4A-I) (eIF-4A-I).]                                                                                                                                                                                                     | Protein Complex |
| P61313 | 60S ribosomal protein L15.                                                                                                                                                                                                                                                                                       | Protein Complex |
| P78345 | Ribonuclease P protein subunit p38 (EC 3.1.26.5) (RNaseP protein p38).                                                                                                                                                                                                                                           | Protein Complex |
| Q00653 | [Nuclear factor NF-kappa-B p100 subunit (DNA-binding factor KBF2), (H2TF1) (Lymphocyte translocation chromosome 10) (Oncogene Lyt-10), (Lyt10) [Contains: Nuclear factor NF-kappa-B p52 subunit].]                                                                                                               | Protein Complex |
| Q04637 | [Eukaryotic translation initiation factor 4 gamma 1 (eIF-4-gamma 1), (eIF-4G1) (eIF-4G 1) (p220).]                                                                                                                                                                                                               | Protein Complex |

|        |                                                                                                                                                                                                                                                                                                                                                        |                 |
|--------|--------------------------------------------------------------------------------------------------------------------------------------------------------------------------------------------------------------------------------------------------------------------------------------------------------------------------------------------------------|-----------------|
| Q13144 | [Translation initiation factor eIF-2B subunit epsilon (eIF-2B GDP-GTP, exchange factor subunit epsilon).]                                                                                                                                                                                                                                              | Protein Complex |
| Q99436 | [Proteasome subunit beta type-7 precursor (EC 3.4.25.1) (Proteasome, subunit Z) (Macropain chain Z) (Multicatalytic endopeptidase complex, chain Z).]                                                                                                                                                                                                  | Protein Complex |
| Q9Y2L1 | [Exosome complex exonuclease RRP44 (EC 3.1.13.-) (Ribosomal RNA-, processing protein 44) (DIS3 protein homolog).]                                                                                                                                                                                                                                      | Protein Complex |
| O00160 | Myosin-I $\alpha$ (Myosin-I $\alpha$ ).                                                                                                                                                                                                                                                                                                                | Protein Complex |
| O00329 | [Phosphatidylinositol-4,5-bisphosphate 3-kinase catalytic subunit delta, isoform (EC 2.7.1.153) (PI3-kinase p110 subunit delta) (PtdIns-3-, kinase p110) (PI3K) (p110delta).]                                                                                                                                                                          | Protein Complex |
| O14775 | [Guanine nucleotide-binding protein subunit beta-5 (Transducin beta, chain 5) (Gbeta5).]                                                                                                                                                                                                                                                               | Protein Complex |
| O15066 | [Kinesin-like protein KIF3B (Microtubule plus end-directed kinesin, motor 3B) (HH0048).]                                                                                                                                                                                                                                                               | Protein Complex |
| O15371 | [Eukaryotic translation initiation factor 3 subunit 7 (eIF-3-zeta), (eIF3 p66) (eIF3d).]                                                                                                                                                                                                                                                               | Protein Complex |
| O75593 | [Forkhead box protein H1 (Forkhead activin signal transducer 1) (Fast-, 1) (hFAST-1) (Forkhead activin signal transducer 2) (Fast-2).]                                                                                                                                                                                                                 | Protein Complex |
| P10155 | [60 kDa SS-A/Ro ribonucleoprotein (60 kDa Ro protein) (60 kDa, ribonucleoprotein Ro) (RoRNP) (Ro 60 kDa autoantigen) (TROVE domain, family member 2) (Sjogren syndrome type A antigen) (SS-A) (Sjogren, syndrome antigen A2).]                                                                                                                         | Protein Complex |
| P12883 | [Myosin-7 (Myosin heavy chain 7) (Myosin heavy chain, cardiac muscle, beta isoform) (MyHC-beta) (Myosin heavy chain slow isoform) (MyHC-, slow).]                                                                                                                                                                                                      | Protein Complex |
| P19087 | [Guanine nucleotide-binding protein G(t), alpha-2 subunit (Transducin, alpha-2 chain).]                                                                                                                                                                                                                                                                | Protein Complex |
| P46977 | [Dolichyl-diphosphooligosaccharide--protein glycosyltransferase subunit, STT3A (EC 2.4.1.119) (Oligosaccharyl transferase subunit STT3A) (STT3-, A) (B5) (Integral membrane protein 1) (TMC).]                                                                                                                                                         | Protein Complex |
| P49720 | [Proteasome subunit beta type-3 (EC 3.4.25.1) (Proteasome theta chain), (Proteasome chain 13) (Proteasome component C10-II).]                                                                                                                                                                                                                          | Protein Complex |
| P52732 | [Kinesin-like protein KIF11 (Kinesin-related motor protein Eg5), (Kinesin-like spindle protein HKSP) (Thyroid receptor-interacting, protein 5) (TRIP-5) (Kinesin-like protein 1).]                                                                                                                                                                     | Protein Complex |
| Q14232 | [Translation initiation factor eIF-2B subunit alpha (eIF-2B GDP-GTP, exchange factor subunit alpha).]                                                                                                                                                                                                                                                  | Protein Complex |
| Q14314 | Fibroleukin precursor (Fibrinogen-like protein 2) (pT49).                                                                                                                                                                                                                                                                                              | Protein Complex |
| Q15008 | [26S proteasome non-ATPase regulatory subunit 6 (26S proteasome, regulatory subunit S10) (p42A) (Proteasome regulatory particle subunit, p44S10) (Phosphonoformate immuno-associated protein 4) (Breast cancer-, associated protein SGA-113M).]                                                                                                        | Protein Complex |
| Q15056 | [Eukaryotic translation initiation factor 4H (eIF-4H) (Williams-Beuren, syndrome chromosome region 1 protein).]                                                                                                                                                                                                                                        | Protein Complex |
| Q15904 | [Vacuolar ATP synthase subunit S1 precursor (EC 3.6.3.14) (V-ATPase, subunit S1) (V-ATPase S1 accessory protein) (V-ATPase Ac45 subunit), (Protein XAP-3).]                                                                                                                                                                                            | Protein Complex |
| Q8IUD2 | [ELKS/RAB6-interacting/CAST family member 1 (RAB6-interacting protein, 2) (ERC protein 1).]                                                                                                                                                                                                                                                            | Protein Complex |
| O94913 | [Pre-mRNA cleavage complex 2 protein Pcf11 (Pre-mRNA cleavage complex, II protein Pcf11) (Fragment).]                                                                                                                                                                                                                                                  | Protein Complex |
| O94973 | [AP-2 complex subunit alpha-2 (Adapter-related protein complex 2 alpha-, 2 subunit) (Alpha-adaptin C) (Adaptor protein complex AP-2 alpha-2, subunit) (Clathrin assembly protein complex 2 alpha-C large chain), (100 kDa coated vesicle protein C) (Plasma membrane adaptor HA2/AP2, adaptin alpha C subunit) (Huntingtin-interacting protein HYPJ).] | Protein Complex |
| P02042 | Hemoglobin subunit delta (Hemoglobin delta chain) (Delta-globin).                                                                                                                                                                                                                                                                                      | Protein Complex |
| P02671 | Fibrinogen alpha chain precursor [Contains: Fibrinopeptide A].                                                                                                                                                                                                                                                                                         | Protein Complex |
| P02746 | Complement C1q subcomponent subunit B precursor.                                                                                                                                                                                                                                                                                                       | Protein Complex |
| P02794 | [Ferritin heavy chain (EC 1.16.3.1) (Ferritin H subunit) (Cell, proliferation-inducing gene 15 protein).]                                                                                                                                                                                                                                              | Protein Complex |
| P03950 | Angiogenin precursor (EC 3.1.27.-) (Ribonuclease 5) (RNase 5).                                                                                                                                                                                                                                                                                         | Protein Complex |

|        |                                                                                                                                                                                                                                     |                 |
|--------|-------------------------------------------------------------------------------------------------------------------------------------------------------------------------------------------------------------------------------------|-----------------|
| P06730 | [Eukaryotic translation initiation factor 4E (eIF4E) (eIF-4E) (mRNA, cap-binding protein) (eIF-4F 25 kDa subunit).]                                                                                                                 | Protein Complex |
| P25054 | Adenomatous polyposis coli protein (Protein APC).                                                                                                                                                                                   | Protein Complex |
| P35222 | Catenin beta-1 (Beta-catenin).                                                                                                                                                                                                      | Protein Complex |
| P35749 | [Myosin-11 (Myosin heavy chain 11) (Myosin heavy chain, smooth muscle, isoform) (SMMHC).]                                                                                                                                           | Protein Complex |
| P40306 | [Proteasome subunit beta type-10 precursor (EC 3.4.25.1) (Proteasome, subunit beta-2i) (Proteasome MECl-1) (Macropain subunit MECl-1), (Multicatalytic endopeptidase complex subunit MECl-1).]                                      | Protein Complex |
| P61803 | [Dolichyl-diphosphooligosaccharide--protein glycosyltransferase subunit, DAD1 (EC 2.4.1.119) (Oligosaccharyl transferase subunit DAD1), (Defender against cell death 1) (DAD-1).]                                                   | Protein Complex |
| P62191 | [26S protease regulatory subunit 4 (P26s4) (Proteasome 26S subunit, ATPase 1).]                                                                                                                                                     | Protein Complex |
| Q02108 | [Guanylate cyclase soluble subunit alpha-3 (EC 4.6.1.2) (GCS-alpha-3), (Soluble guanylate cyclase large subunit) (GCS-alpha-1).]                                                                                                    | Protein Complex |
| Q04771 | [Activin receptor type-1 precursor (EC 2.7.11.30) (Activin receptor, type I) (ACTR-I) (Serine/threonine-protein kinase receptor R1) (SKR1), (Activin receptor-like kinase 2) (ALK-2) (TGF-B superfamily receptor, type I) (TSR-I).] | Protein Complex |
| Q08334 | [Interleukin-10 receptor beta chain precursor (IL-10R-B) (IL-10R2), (Cytokine receptor family 2 member 4) (Cytokine receptor class-II, member 4) (CRF2-4) (CDw210b antigen).]                                                       | Protein Complex |
| Q99460 | [26S proteasome non-ATPase regulatory subunit 1 (26S proteasome, regulatory subunit RPN2) (26S proteasome regulatory subunit S1) (26S, proteasome subunit p112).]                                                                   | Protein Complex |
| Q99575 | Ribonucleases P/MRP protein subunit POP1 (EC 3.1.26.5) (hPOP1).                                                                                                                                                                     | Protein Complex |
| Q99613 | [Eukaryotic translation initiation factor 3 subunit 8 (eIF3 p110), (eIF3c).]                                                                                                                                                        | Protein Complex |
| Q9NRD0 | F-box only protein 8 (F-box/SEC7 protein FBS).                                                                                                                                                                                      | Protein Complex |
| Q9UI10 | [Translation initiation factor eIF-2B subunit delta (eIF-2B GDP-GTP, exchange factor subunit delta).]                                                                                                                               | Protein Complex |
| Q15544 | [Transcription initiation factor TFIID subunit 11 (Transcription, initiation factor TFIID 28 kDa subunit) (TAF(II)28) (TAFII-28), (TAFII28) (TFIID subunit p30-beta).]                                                              | Transcription   |
| Q16594 | [Transcription initiation factor TFIID subunit 9 (Transcription, initiation factor TFIID 31 kDa subunit) (TAFII-31) (TAFII-32), (TAFII32) (STAF31/32).]                                                                             | Transcription   |
| P21675 | [Transcription initiation factor TFIID subunit 1 (EC 2.7.11.1), (Transcription initiation factor TFIID 250 kDa subunit) (TAF(II)250), (TAFII-250) (TAFII250) (TBP-associated factor 250 kDa) (p250) (Cell, cycle gene 1 protein).]  | Transcription   |
| P29374 | [AT-rich interactive domain-containing protein 4A (ARID domain-, containing protein 4A) (Retinoblastoma-binding protein 1) (RBBP-1).]                                                                                               | Transcription   |
| P20226 | [TATA-box-binding protein (TATA-box factor) (TATA-binding factor) (TATA, sequence-binding protein) (Transcription initiation factor TFIID TBP, subunit).]                                                                           | Transcription   |
| P49848 | [Transcription initiation factor TFIID subunit 6 (Transcription, initiation factor TFIID 70 kDa subunit) (TAF(II)70) (TAFII-70) (TAFII-, 80) (TAFII80).]                                                                            | Transcription   |
| P50750 | [Cell division protein kinase 9 (EC 2.7.11.22) (EC 2.7.11.23) (Cyclin-, dependent kinase 9) (Serine/threonine-protein kinase PITALRE) (C-2K), (Cell division cycle 2-like protein kinase 4).]                                       | Transcription   |
| Q15406 | [Orphan nuclear receptor NR6A1 (Germ cell nuclear factor) (GCNF), (hGCNF) (Retinoid receptor-related testis-specific receptor) (RTR), (hRTR).]                                                                                      | Transcription   |
| Q15542 | [Transcription initiation factor TFIID subunit 5 (Transcription, initiation factor TFIID 100 kDa subunit) (TAF(II)100) (TAFII-100), (TAFII100).]                                                                                    | Transcription   |
| Q15796 | [Mothers against decapentaplegic homolog 2 (SMAD 2) (Mothers against, DPP homolog 2) (Mad-related protein 2) (hMAD-2) (JV18-1) (hSMAD2).]                                                                                           | Transcription   |



|        |                                                                                                                                                                                                                                                                                                                                 |               |
|--------|---------------------------------------------------------------------------------------------------------------------------------------------------------------------------------------------------------------------------------------------------------------------------------------------------------------------------------|---------------|
| Q99814 | [Endothelial PAS domain-containing protein 1 (EPAS-1) (Member of PAS, protein 2) (Basic-helix-loop-helix-PAS protein MOP2) (Hypoxia-, inducible factor 2 alpha) (HIF-2 alpha) (HIF2 alpha) (HIF-1 alpha-like, factor) (HLF).]                                                                                                   | Transcription |
| O00268 | [Transcription initiation factor TFIID subunit 4 (TBP-associated factor, 4) (Transcription initiation factor TFIID 135 kDa subunit), (TAF(II)135) (TAFII-135) (TAFII135) (TAFII-130) (TAFII130).]                                                                                                                               | Transcription |
| O00472 | RNA polymerase II elongation factor ELL2.                                                                                                                                                                                                                                                                                       | Transcription |
| Q13461 | [Forkhead box protein E3 (Forkhead-related protein FKHL12) (Forkhead-, related transcription factor 8) (FREAC-8).]                                                                                                                                                                                                              | Transcription |
| Q15543 | [Transcription initiation factor TFIID subunit 13 (Transcription, initiation factor TFIID 18 kDa subunit) (TAF(II)18) (TAFII-18), (TAFII18).]                                                                                                                                                                                   | Transcription |
| Q16514 | [Transcription initiation factor TFIID subunit 12 (Transcription, initiation factor TFIID 20/15 kDa subunits) (TAFII-20/TAFII-15), (TAFII20/TAFII15).]                                                                                                                                                                          | Transcription |
| P35269 | [Transcription initiation factor IIF subunit alpha (EC 2.7.11.1), (TFIIF-alpha) (General transcription factor IIF subunit 1), (Transcription initiation factor RAP74) (General transcription factor, IIF polypeptide 1 74 kDa subunit protein).]                                                                                | Transcription |
| Q9NVW2 | [RING finger protein 12 (LIM domain-interacting RING finger protein), (RING finger LIM domain-binding protein) (R-LIM) (Renal carcinoma, antigen NY-REN-43).]                                                                                                                                                                   | Transcription |
| O00116 | [Alkylidihydroxyacetonephosphate synthase, peroxisomal precursor, (EC 2.5.1.26) (Alkyl-DHAP synthase) (Alkylglycerone-phosphate, synthase) (Aging-associated gene 5 protein).]                                                                                                                                                  | Vesicle       |
| O14579 | Coatomer subunit epsilon (Epsilon-coat protein) (Epsilon-COP).                                                                                                                                                                                                                                                                  | Vesicle       |
| O14994 | Synapsin-3 (Synapsin III).                                                                                                                                                                                                                                                                                                      | Vesicle       |
| P11717 | [Cation-independent mannose-6-phosphate receptor precursor (CI Man-6-P, receptor) (CI-MPR) (M6PR) (Insulin-like growth factor 2 receptor), (Insulin-like growth factor II receptor) (IGF-II receptor) (M6P/IGF2, receptor) (M6P/IGF2R) (300 kDa mannose 6-phosphate receptor) (MPR 300), (MPR300) (CD222 antigen).]             | Vesicle       |
| P19801 | [Amiloride-sensitive amine oxidase [copper-containing] precursor, (EC 1.4.3.6) (Diamine oxidase) (DAO) (Amiloride-binding protein) (ABP), (Histaminase) (Kidney amine oxidase) (KAO).]                                                                                                                                          | Vesicle       |
| P51659 | [Peroxisomal multifunctional enzyme type 2 (MFE-2) (D-bifunctional, protein) (DBP) (17-beta-hydroxysteroid dehydrogenase 4) (17-beta-HSD, 4) (D-3-hydroxyacyl-CoA dehydratase) (EC 4.2.1.107) (3-alpha,7-, alpha,12-alpha-trihydroxy-5-beta-cholest-24-enoyl-CoA hydratase) (3-, hydroxyacyl-CoA dehydrogenase) (EC 1.1.1.35).] | Vesicle       |
| P51681 | [C-C chemokine receptor type 5 (C-C CKR-5) (CC-CKR-5) (CCR-5) (CCR5), (HIV-1 fusion coreceptor) (CHEMR13) (CD195 antigen).]                                                                                                                                                                                                     | Vesicle       |
| P53621 | [Coatomer subunit alpha (Alpha-coat protein) (Alpha-COP) (HEPCOP) (HEP-, COP) [Contains: Xenin (Xenopsin-related peptide); Proxenin].]                                                                                                                                                                                          | Vesicle       |
| P53992 | Protein transport protein Sec24C (SEC24-related protein C).                                                                                                                                                                                                                                                                     | Vesicle       |
| Q15036 | Sorting nexin-17.                                                                                                                                                                                                                                                                                                               | Vesicle       |
| Q15126 | Phosphomevalonate kinase (EC 2.7.4.2) (PMKase).                                                                                                                                                                                                                                                                                 | Vesicle       |
| O95486 | Protein transport protein Sec24A (SEC24-related protein A) (Fragment).                                                                                                                                                                                                                                                          | Vesicle       |
| P21579 | Synaptotagmin-1 (Synaptotagmin I) (Sytl) (p65).                                                                                                                                                                                                                                                                                 | Vesicle       |
| P35606 | Coatomer subunit beta' (Beta'-coat protein) (Beta'-COP) (p102).                                                                                                                                                                                                                                                                 | Vesicle       |
| Q9UBF2 | Coatomer subunit gamma-2 (Gamma-2-coat protein) (Gamma-2-COP).                                                                                                                                                                                                                                                                  | Vesicle       |
| O15228 | [Dihydroxyacetone phosphate acyltransferase (EC 2.3.1.42) (DHAP-AT), (DAP-AT) (Glycerone-phosphate O-acyltransferase) (Acyl-, CoA:dihydroxyacetonephosphateacyltransferase).]                                                                                                                                                   | Vesicle       |
| O43933 | [Peroxisome biogenesis factor 1 (Peroxin-1) (Peroxisome biogenesis, disorder protein 1).]                                                                                                                                                                                                                                       | Vesicle       |

|        |                                                                                                                                                                                                                                                                                   |         |
|--------|-----------------------------------------------------------------------------------------------------------------------------------------------------------------------------------------------------------------------------------------------------------------------------------|---------|
| O60333 | Kinesin-like protein KIF1B (Klp).                                                                                                                                                                                                                                                 | Vesicle |
| O60664 | [Mannose-6-phosphate receptor-binding protein 1 (Cargo selection, protein TIP47) (47 kDa mannose 6-phosphate receptor-binding protein), (47 kDa MPR-binding protein) (Placental protein 17) (PP17).]                                                                              | Vesicle |
| P20930 | Filaggrin.                                                                                                                                                                                                                                                                        | Vesicle |
| Q13907 | [Isopentenyl-diphosphate Delta-isomerase 1 (EC 5.3.3.2) (IPP isomerase, 1) (Isopentenyl pyrophosphate isomerase 1) (IPPI1).]                                                                                                                                                      | Vesicle |
| Q14833 | Metabotropic glutamate receptor 4 precursor (mGluR4).                                                                                                                                                                                                                             | Vesicle |
| O94855 | Protein transport protein Sec24D (SEC24-related protein D).                                                                                                                                                                                                                       | Vesicle |
| P00533 | [Epidermal growth factor receptor precursor (EC 2.7.10.1) (Receptor, tyrosine-protein kinase ErbB-1).]                                                                                                                                                                            | Vesicle |
| P02786 | [Transferrin receptor protein 1 (TfR1) (TR) (TfR) (TfRr) (CD71 antigen), (T9) (p90) [Contains: Transferrin receptor protein 1, serum form, (sTfR)].]                                                                                                                              | Vesicle |
| P27544 | LAG1 longevity assurance homolog 1 (UOG-1 protein) (Protein LAG1).                                                                                                                                                                                                                | Vesicle |
| P31512 | [Dimethylaniline monooxygenase [N-oxide-forming] 4 (EC 1.14.13.8), (Hepatic flavin-containing monooxygenase 4) (FMO 4) (Dimethylaniline, oxidase 4).]                                                                                                                             | Vesicle |
| P32856 | Syntaxin-2 (Epimorphin).                                                                                                                                                                                                                                                          | Vesicle |
| P33261 | [Cytochrome P450 2C19 (EC 1.14.13.80) ((R)-limonene 6-monooxygenase), (EC 1.14.13.48) ((S)-limonene 6-monooxygenase) (EC 1.14.13.49) ((S)-, limonene 7-monooxygenase) (CYP11C19) (P450-11A) (Mephenytoin 4-, hydroxylase) (CYP11C17) (P450-254C).]                                | Vesicle |
| P37058 | [Testosterone 17-beta-dehydrogenase 3 (EC 1.1.1.64) (17-beta-HSD 3), (Testicular 17-beta-hydroxysteroid dehydrogenase).]                                                                                                                                                          | Vesicle |
| Q08426 | [Peroxisomal bifunctional enzyme (PBE) (PBFE) [Includes: Enoyl-CoA, hydratase/3,2-trans-enoyl-CoA isomerase (EC 5.3.3.8) (EC 4.2.1.17); 3-, hydroxyacyl-CoA dehydrogenase (EC 1.1.1.35)].]                                                                                        | Vesicle |
| Q99424 | [Acyl-coenzyme A oxidase 2, peroxisomal (EC 1.17.99.3) (3-alpha,7-, alpha,12-alpha-trihydroxy-5-beta-cholestanoyl-CoA 24-hydroxylase) (3-, alpha,7-alpha,12-alpha-trihydroxy-5-beta-cholestanoyl-CoA oxidase), (Trihydroxycoprostanoyl-CoA oxidase) (THCCox) (THCA-CoA oxidase).] | Vesicle |
| Q99698 | Lysosomal-trafficking regulator (Beige homolog).                                                                                                                                                                                                                                  | Vesicle |
| Q9NYQ2 | [Hydroxyacid oxidase 2 (EC 1.1.3.15) (HAOX2) ((S)-2-hydroxy-acid, oxidase, peroxisomal) (Medium chain alpha-hydroxy acid oxidase), (Medium-chain L-2-hydroxy acid oxidase).]                                                                                                      | Vesicle |
| Q9UKU0 | [Long-chain-fatty-acid--CoA ligase 6 (EC 6.2.1.3) (Long-chain acyl-CoA, synthetase 6) (LACS 6).]                                                                                                                                                                                  | Vesicle |
| Q9UL25 | Ras-related protein Rab-21.                                                                                                                                                                                                                                                       | Vesicle |
| O15254 | [Acyl-coenzyme A oxidase 3, peroxisomal (EC 1.3.3.6) (Pristanoyl-CoA, oxidase) (Branched-chain acyl-CoA oxidase) (BRCAcox).]                                                                                                                                                      | Vesicle |
| O60344 | Endothelin-converting enzyme 2 (EC 3.4.24.71) (ECE-2).                                                                                                                                                                                                                            | Vesicle |
| O75146 | [Huntingtin-interacting protein 1-related protein (Hip1-related) (Hip, 12).]                                                                                                                                                                                                      | Vesicle |
| O75351 | [Vacuolar protein sorting-associating protein 4B (Suppressor of K(+), transport growth defect 1) (Protein SKD1).]                                                                                                                                                                 | Vesicle |
| P13473 | [Lysosome-associated membrane glycoprotein 2 precursor (LAMP-2) (CD107b, antigen).]                                                                                                                                                                                               | Vesicle |
| P18825 | [Alpha-2C adrenergic receptor (Alpha-2C adrenoceptor) (Alpha-2C, adrenoceptor) (Alpha-2 adrenergic receptor subtype C4).]                                                                                                                                                         | Vesicle |
| P19224 | [UDP-glucuronosyltransferase 1-6 precursor (EC 2.4.1.17) (UDP-, glucuronosyltransferase 1A6) (UDPGT) (UGT1*6) (UGT1-06) (UGT1.6) (UGT-, 1F) (UGT1F) (Phenol-metabolizing UDP-glucuronosyltransferase).]                                                                           | Vesicle |
| Q92902 | Hermansky-Pudlak syndrome 1 protein.                                                                                                                                                                                                                                              | Vesicle |
| O95405 | [Zinc finger FYVE domain-containing protein 9 (Mothers against, decapentaplegic homolog-interacting protein) (Madh-interacting, protein) (Smad anchor for receptor activation) (Receptor activation, anchor) (hSARA) (Novel serine protease) (NSP).]                              | Vesicle |

|        |                                                                                                                                                                                            |         |
|--------|--------------------------------------------------------------------------------------------------------------------------------------------------------------------------------------------|---------|
| O95822 | Malonyl-CoA decarboxylase, mitochondrial precursor (EC 4.1.1.9) (MCD).                                                                                                                     | Vesicle |
| P02787 | [Serotransferrin precursor (Transferrin) (Siderophilin) (Beta-1-metal-, binding globulin).]                                                                                                | Vesicle |
| P06133 | [UDP-glucuronosyltransferase 2B4 precursor (EC 2.4.1.17) (UDPGT), (Hydroxycholeic acid) (HLUG25) (UDPGTh-1).]                                                                              | Vesicle |
| P22307 | [Non-specific lipid-transfer protein (EC 2.3.1.176) (Propanoyl-CoA C-, acyltransferase) (NSL-TP) (Sterol carrier protein 2) (SCP-2) (Sterol, carrier protein X) (SCP-X) (SCP-chi) (SCPX).] | Vesicle |
| P31513 | [Dimethylaniline monooxygenase [N-oxide-forming] 3 (EC 1.14.13.8), (Hepatic flavin-containing monooxygenase 3) (FMO 3) (Dimethylaniline, oxidase 3) (FMO form 2) (FMO II).]                | Vesicle |
| P35247 | [Pulmonary surfactant-associated protein D precursor (SP-D) (PSP-D), (Lung surfactant protein D).]                                                                                         | Vesicle |
| P35504 | [UDP-glucuronosyltransferase 1-5 precursor (EC 2.4.1.17) (UDP-, glucuronosyltransferase 1A5) (UDPGT) (UGT1*5) (UGT1-05) (UGT1.5) (UGT-, 1E) (UGT1E).]                                      | Vesicle |
| Q02928 | [Cytochrome P450 4A11 precursor (EC 1.14.15.3) (CYP1A11) (Fatty acid, omega-hydroxylase) (P-450 HK omega) (Lauric acid omega-hydroxylase), (CYP4A11) (P450-HL-omega).]                     | Vesicle |
| Q13393 | [Phospholipase D1 (EC 3.1.4.4) (PLD 1) (Choline phosphatase 1), (Phosphatidylcholine-hydrolyzing phospholipase D1) (hPLD1).]                                                               | Vesicle |
| Q99523 | [Sortilin precursor (Neurotensin receptor 3) (NTR3) (NT3) (Glycoprotein, 95) (Gp95) (100 kDa NT receptor).]                                                                                | Vesicle |
| Q9NYQ3 | [Hydroxyacid oxidase 2 (EC 1.1.3.15) (HAOX2) ((S)-2-hydroxy-acid, oxidase, peroxisomal) (Long chain alpha-hydroxy acid oxidase) (Long-, chain L-2-hydroxy acid oxidase).]                  | Vesicle |
| Q9UJM8 | Hydroxyacid oxidase 1 (EC 1.1.3.15) (HAOX1) (Glycolate oxidase) (GOX).                                                                                                                     | Vesicle |
| Q9UL26 | Ras-related protein Rab-22A (Rab-22).                                                                                                                                                      | Vesicle |
