# Supplementary material for: The morphology and biochemistry of nanostructures provide evidence for synthesis and signaling functions in human cerebrospinal fluid
Source: PubMed Central journal article supplement (PMC2746175; doi:10.1186/1743-8454-6-10), 2009-09-07
Supplement: 1743-8454-6-10-S2.pdf [file 1743-8454-6-10-S2.pdf]

## Supplementary Table 2. CSF Proteins from the P3-enriched pellet and the S3 supernatant.

CSF samples from one participant, collected on two separate occasions (Visit 1 and 2), were separated into P3 and S3 fractions, as described in Methods. The two P3 and S3 samples were treated with trypsin, carboxymethylated, and subjected to a single high resolution LC-MS/MS analysis. Proteins are ordered by P3 followed by S3 of Data 3, then P3 followed by S3 of Data 4. Within each sample, they are ordered by the protein GO component assignment in alphabetical order

| P3 of Data 3, visit 1 |                                                                                                                                                                                                                                                                             |                        |
|-----------------------|-----------------------------------------------------------------------------------------------------------------------------------------------------------------------------------------------------------------------------------------------------------------------------|------------------------|
| Uniprot Number        | Protein Name                                                                                                                                                                                                                                                                | GO Component CATEGORY  |
| O14924                | Regulator of G-protein signaling 12 (RGS12).                                                                                                                                                                                                                                | Chromosomal            |
| Q8NI77                | Kinesin-like protein KIF18A.                                                                                                                                                                                                                                                | Cytoskeletal           |
| Q99469                | [SH3 and cysteine-rich domain-containing protein (SRC homology 3 and, cysteine-rich domain protein).]                                                                                                                                                                       | Cytosolic              |
| Q9NZ09                | [Ubiquitin-associated protein 1 (UBAP) (Nasopharyngeal carcinoma-, associated gene 20 protein).]                                                                                                                                                                            | Cytosolic              |
| O75912                | [Diacylglycerol kinase iota (EC 2.7.1.107) (Diglyceride kinase iota), (DGK-iota) (DAG kinase iota).]                                                                                                                                                                        | Cytosolic              |
| P00492                | [Hypoxanthine-guanine phosphoribosyltransferase (EC 2.4.2.8) (HGPRT), (HGPRTase).]                                                                                                                                                                                          | Cytosolic              |
| P12272                | [Parathyroid hormone-related protein precursor (PTH-rP) (PTHrP), [Contains: PTHrP[1-36]; PTHrP[38-94]; Osteostatin (PTHrP[107-139])].]                                                                                                                                      | Cytosolic              |
| Q5K4E3                | [Polyserase-2 precursor (EC 3.4.21.-) (Polyserine protease 2) (Serine, protease 36).]                                                                                                                                                                                       | Cytosolic              |
| Q9P2V4                | [Leucine-rich repeat, immunoglobulin-like domain and transmembrane, domain-containing protein 1 precursor (Leucine-rich repeat-containing, protein 21) (Photoreceptor-associated LRR superfamily protein), (Retina-specific protein PAL).]                                  | ER                     |
| P01009                | [Alpha-1-antitrypsin precursor (Alpha-1 protease inhibitor) (Alpha-1-, antiproteinase).]                                                                                                                                                                                    | Extracellular          |
| P01770                | Ig heavy chain V-III region NIE.                                                                                                                                                                                                                                            | Extracellular          |
| P41222                | [Prostaglandin-H2 D-isomerase precursor (EC 5.3.99.2) (Lipocalin-type, prostaglandin-D synthase) (Glutathione-independent PGD synthetase), (Prostaglandin-D2 synthase) (PGD2 synthase) (PGDS2) (PGDS) (Beta-trace, protein) (Cerebrin-28).]                                 | Extracellular          |
| P11487                | [INT-2 proto-oncogene protein precursor (Fibroblast growth factor 3), (FGF-3) (HBGF-3).]                                                                                                                                                                                    | Extracellular          |
| P02768                | Serum albumin precursor.                                                                                                                                                                                                                                                    | Extracellular          |
| P01023                | Alpha-2-macroglobulin precursor (Alpha-2-M).                                                                                                                                                                                                                                | Extracellular          |
| Q12979                | Active breakpoint cluster region-related protein.                                                                                                                                                                                                                           | Go Component not found |
| Q9NQ18                | CAP-binding protein complex interacting protein 1 (Fragment).                                                                                                                                                                                                               | Go Component not found |
| Q76MJ5                | [Serine/threonine-protein kinase/endoribonuclease IRE2 precursor, (Inositol-requiring protein 2) (hIRE2p) (IRE1b) (Ire1-beta), (Endoplasmic reticulum-to-nucleus signaling 2) [Includes:, Serine/threonine-protein kinase (EC 2.7.11.1); Endoribonuclease, (EC 3.1.26.-)].] | Go Component not found |
| Q8N1F7                | [Nuclear pore complex protein Nup93 (Nucleoporin Nup93) (93 kDa, nucleoporin).]                                                                                                                                                                                             | Go Component not found |
| O43586                | [Proline-serine-threonine phosphatase-interacting protein 1 (PEST, phosphatase-interacting protein 1) (CD2-binding protein 1) (H-PIP).]                                                                                                                                     | Go Component not found |

|        |                                                                                                                                                                                                   |                        |
|--------|---------------------------------------------------------------------------------------------------------------------------------------------------------------------------------------------------|------------------------|
| Q86X06 | BRD1 protein.                                                                                                                                                                                     | Go Component not found |
| Q9NX55 | Huntingtin-interacting protein HYPK (Huntingtin yeast partner K).                                                                                                                                 | Go Component not found |
| Q12955 | Ankyrin-3 (ANK-3) (Ankyrin-G).                                                                                                                                                                    | Go Component not found |
| Q5TBS2 | [OTTHUMP00000018460 (Heterogeneous nuclear ribonucleoprotein A1-like., isoform CRA_b).]                                                                                                           | Go Component not found |
| O60811 | PRAME family member 2.                                                                                                                                                                            | Go Component not found |
| Q5JT25 | Ras-related protein Rab-41.                                                                                                                                                                       | Go Component not found |
| Q5VZP5 | Inactive dual specificity phosphatase 27.                                                                                                                                                         | Go Component not found |
| Q6NVZ9 | LOC729176 protein (Fragment).                                                                                                                                                                     | Go Component not found |
| Q8N201 | Integrator complex subunit 1 (Int1).                                                                                                                                                              | Go Component not found |
| Q86U17 | Serpin A11 precursor.                                                                                                                                                                             | Go Component not found |
| Q8IYJ1 | Copine-9 (Copine IX).                                                                                                                                                                             | Go Component not found |
| Q8WYC2 | Dystrophin (Fragment).                                                                                                                                                                            | Go Component not found |
| Q9BY14 | [Testis-expressed protein 101 precursor (Scleroderma-associated, autoantigen) (Cell surface receptor NYD-SP8) (Spermatogenesis-related, gene protein).]                                           | Go Component not found |
| Q96A35 | 39S ribosomal protein L24, mitochondrial precursor (L24mt) (MRP-L24).                                                                                                                             | Go Component not found |
| P13762 | HLA class II histocompatibility antigen, DR-W53 beta chain precursor.                                                                                                                             | Go Component not found |
| Q13201 | [Multimerin-1 precursor (Endothelial cell multimerin 1) (EMILIN-4), (Elastin microfibril interface located protein 4) (Elastin microfibril, interfacier 4).]                                      | Go Component not found |
| P59541 | Taste receptor type 2 member 47 (T2R47).                                                                                                                                                          | Go Component not found |
| P14543 | Nidogen-1 precursor (Entactin).                                                                                                                                                                   | Go Component not found |
| Q6MZQ6 | Putative uncharacterized protein DKFZp686G11190.                                                                                                                                                  | Go Component not found |
| Q6PK57 | LOC554175 protein.                                                                                                                                                                                | Go Component not found |
| Q6VB91 | COBW domain-containing protein 3.                                                                                                                                                                 | Go Component not found |
| Q5SZL2 | [Coiled-coil domain-containing protein C6orf204 (Serologically defined, breast cancer antigen NY-BR-15).]                                                                                         | Go Component not found |
| Q96CF2 | [Charged multivesicular body protein 4c (Chromatin-modifying protein, 4c) (CHMP4c) (Vacuolar protein-sorting-associated protein 7-3) (SNF7-, 3) (hSnf7-3) (SNF7 homolog associated with Alix 3).] | Go Component not found |
| Q9H3T8 | Strawberry notch homolog 1 (Protein MOP-3).                                                                                                                                                       | Go Component not found |
| Q9HBQ9 | Putative uncharacterized protein.                                                                                                                                                                 | Go Component not found |
| Q8NGX2 | Olfactory receptor 2T35 (Olfactory receptor OR1-66).                                                                                                                                              | Go Component not found |
| Q6U7Q0 | [Zinc finger protein 322A (Zinc finger protein 388) (Zinc finger, protein 489).]                                                                                                                  | Go Component not found |
| Q6P1Q0 | [LETM1 domain-containing protein 1 (Cervical cancer 1 proto-oncogene, protein p40) (Cervical cancer proto-oncogene 2 protein) (HCRR-2).]                                                          | Go Component not found |
| Q8N1L7 | CDNA FLJ40039 fis, clone SYNOV2000397.                                                                                                                                                            | Go Component not found |
| Q8N8Z0 | Putative uncharacterized protein C12orf27.                                                                                                                                                        | Go Component not found |
| Q5TCY1 | Tau-tubulin kinase 1 (EC 2.7.11.1) (Brain-derived tau kinase).                                                                                                                                    | Go Component not found |
| Q9BS16 | [Centromere protein K (CENP-K) (Interphase centromere complex protein, 37) (Protein AF-5alpha) (p33).]                                                                                            | Go Component not found |

|        |                                                                                                                                                                                                                                                                               |                          |
|--------|-------------------------------------------------------------------------------------------------------------------------------------------------------------------------------------------------------------------------------------------------------------------------------|--------------------------|
| Q01740 | [Dimethylaniline monooxygenase [N-oxide-forming] 1 (EC 1.14.13.8), (Fetal hepatic flavin-containing monooxygenase 1) (FMO 1), (Dimethylaniline oxidase 1).]                                                                                                                   | Go Component not found   |
| O14744 | [Protein arginine N-methyltransferase 5 (EC 2.1.1.125) (EC 2.1.1.-), (Shk1 kinase-binding protein 1 homolog) (SKB1Hs) (Jak-binding protein, 1) (72 kDa IClN-binding protein).]                                                                                                | Go Component not found   |
| O43557 | [Tumor necrosis factor ligand superfamily member 14 (Herpesvirus entry, mediator-ligand) (HVEM-L) (CD258 antigen) [Contains: Tumor necrosis, factor ligand superfamily member 14, membrane form; Tumor necrosis, factor ligand superfamily member 14, soluble form].]         | Go Component not found   |
| P12955 | [Xaa-Pro dipeptidase (EC 3.4.13.9) (X-Pro dipeptidase) (Proline, dipeptidase) (Prolidase) (Imidodipeptidase).]                                                                                                                                                                | Go Component not found   |
| P01034 | [Cystatin-C precursor (Cystatin-3) (Neuroendocrine basic polypeptide), (Gamma-trace) (Post-gamma-globulin).]                                                                                                                                                                  | Go Component not found   |
| Q59FU7 | G protein-coupled receptor 156 variant (Fragment).                                                                                                                                                                                                                            | Go Component not found   |
| P15173 | Myogenin (Myogenic factor 4) (Myf-4).                                                                                                                                                                                                                                         | Go Component not found   |
| Q99798 | [Aconitate hydratase, mitochondrial precursor (EC 4.2.1.3) (Citrate, hydro-lyase) (Aconitase).]                                                                                                                                                                               | Mitochondrial            |
| Q9HCC0 | [Methylcrotonoyl-CoA carboxylase beta chain, mitochondrial precursor, (EC 6.4.1.4) (3-methylcrotonyl-CoA carboxylase 2) (MCCase subunit, beta) (3-methylcrotonyl-CoA:carbon dioxide ligase subunit beta) (3-, methylcrotonyl-CoA carboxylase non-biotin-containing subunit).] | Mitochondrial            |
| Q9UDR5 | [Alpha-aminoadipic semialdehyde synthase, mitochondrial precursor, (LKR/SDH) [Includes: Lysine ketoglutarate reductase (EC 1.5.1.8) (LOR), (LKR); Saccharopine dehydrogenase (EC 1.5.1.9) (SDH)].]                                                                            | Mitochondrial            |
| Q9NY61 | [Protein AATF (Apoptosis-antagonizing transcription factor) (Rb-binding, protein Che-1).]                                                                                                                                                                                     | Nuclear                  |
| Q9HCY0 | Putative transcription factor-like nuclear regulator.                                                                                                                                                                                                                         | Nuclear                  |
| Q9H0E7 | [Ubiquitin carboxyl-terminal hydrolase 44 (EC 3.1.2.15) (Ubiquitin, thioesterase 44) (Ubiquitin-specific-processing protease 44), (Deubiquitinating enzyme 44).]                                                                                                              | Nuclear                  |
| Q7Z3Y9 | Keratin-26 (Type I inner root sheath-specific keratin-K25irs2).                                                                                                                                                                                                               | Other Filament or Tubule |
| Q86VF7 | Nebulin-related-anchoring protein (N-RAP).                                                                                                                                                                                                                                    | Other Go Component       |
| P20908 | Collagen alpha-1(V) chain precursor.                                                                                                                                                                                                                                          | Other Go Component       |
| Q6ZP25 | CDNA FLJ26676 fis, clone MPG03726.                                                                                                                                                                                                                                            | Other Go Component       |
| Q6ZP91 | CDNA FLJ26213 fis, clone ADG07906.                                                                                                                                                                                                                                            | Other Go Component       |
| Q8N845 | CDNA FLJ40023 fis, clone STOMA2007680.                                                                                                                                                                                                                                        | Other Go Component       |
| Q6NVV1 | Putative uncharacterized protein.                                                                                                                                                                                                                                             | Other Go Component       |
| Q6ZT89 | CDNA FLJ44862 fis, clone BRALZ2010842.                                                                                                                                                                                                                                        | Other Membrane           |
| Q9BZJ6 | Probable G-protein coupled receptor 63 (PSP24-beta) (PSP24-2).                                                                                                                                                                                                                | Other Membrane           |
| Q93070 | [Ecto-ADP-ribosyltransferase 4 precursor (EC 2.4.2.31) (NAD(P)(+)-, arginine ADP-ribosyltransferase 4) (Mono(ADP-ribosyl)transferase 4), (Dombrock blood group carrier molecule) (CD297 antigen).]                                                                            | Other Membrane           |
| Q9UPU3 | VPS10 domain-containing receptor SorCS3 precursor.                                                                                                                                                                                                                            | Other Membrane           |
| O14817 | [Tetraspanin-4 (Tspan-4) (Transmembrane 4 superfamily member 7) (Novel, antigen 2) (NAG-2).]                                                                                                                                                                                  | Plasma Membrane          |
| Q14517 | [Cadherin-related tumor suppressor homolog precursor (Protein fat, homolog).]                                                                                                                                                                                                 | Plasma Membrane          |
| Q8N126 | [Cell adhesion molecule 3 precursor (Immunoglobulin superfamily member, 4B) (Nectin-like protein 1) (TSLC1-like protein 1) (Synaptic cell, adhesion molecule 3) (Brain immunoglobulin receptor).]                                                                             | Plasma Membrane          |
| O75899 | [Gamma-aminobutyric acid type B receptor subunit 2 precursor (GABA-B, receptor 2) (GABA-B-R2) (Gb2) (GABABR2) (G-protein coupled receptor, 51) (HG20).]                                                                                                                       | Plasma Membrane          |

|        |                                                                                             |                 |
|--------|---------------------------------------------------------------------------------------------|-----------------|
| O15169 | Axin-1 (Axis inhibition protein 1) (hAxin).                                                 | Protein Complex |
| Q14714 | [Sarcospan (K-ras oncogene-associated protein) (Kirsten-ras-associated, protein).]          | Protein Complex |
| Q14493 | [Histone RNA hairpin-binding protein (Histone stem-loop-binding, protein).]                 | Protein Complex |
| P02787 | [Serotransferrin precursor (Transferrin) (Siderophilin) (Beta-1-metal-, binding globulin).] | Vesicle         |

S3 of Data 3, visit 1

| Uniprot Number | Protein Name                                                                                                                                                                       | GO Component CATEGORY |
|----------------|------------------------------------------------------------------------------------------------------------------------------------------------------------------------------------|-----------------------|
| Q14565         | Meiotic recombination protein DMC1/LIM15 homolog.                                                                                                                                  | Chromosomal           |
| Q9NQS7         | Inner centromere protein.                                                                                                                                                          | Chromosomal           |
| O43602         | [Neuronal migration protein doublecortin (Lissencephalin-X) (Lis-X), (Doublin).]                                                                                                   | Cytoskeletal          |
| Q14118         | [Dystroglycan precursor (Dystrophin-associated glycoprotein 1), [Contains: Alpha-dystroglycan (Alpha-DG); Beta-dystroglycan (Beta-, DG)].]                                         | Cytoskeletal          |
| O95425         | Supervillin (Archvillin) (p205/p250).                                                                                                                                              | Cytoskeletal          |
| Q15813         | Tubulin-specific chaperone E (Tubulin-folding cofactor E).                                                                                                                         | Cytoskeletal          |
| P06396         | [Gelsolin precursor (Actin-depolymerizing factor) (ADF) (Brevin), (AGEL).]                                                                                                         | Cytoskeletal          |
| Q07283         | Trichohyalin.                                                                                                                                                                      | Cytoskeletal          |
| Q5HCH8         | Myosin-VB (Myosin-7B) (Fragment).                                                                                                                                                  | Cytoskeletal          |
| Q9C0H6         | Kelch-like protein 4.                                                                                                                                                              | Cytoskeletal          |
| Q9Y2M5         | [Kelch-like protein 20 (Kelch-like ECT2-interacting protein) (Kelch-, like protein X).]                                                                                            | Cytoskeletal          |
| Q9UDT6         | [CAP-Gly domain-containing linker protein 2 (Cytoplasmic linker protein, 2) (Cytoplasmic linker protein 115) (CLIP-115) (Williams-Beuren, syndrome chromosomal region 4 protein).] | Cytoskeletal          |
| Q9NYZ3         | G2 and S phase-expressed protein 1 (B99 homolog).                                                                                                                                  | Cytoskeletal          |
| P02730         | [Band 3 anion transport protein (Anion exchange protein 1) (AE 1), (Solute carrier family 4 member 1) (CD233 antigen).]                                                            | Cytoskeletal          |
| Q684P5         | [GTPase activating Rap/RanGAP domain-like protein 4 (Rap1 GTPase-, activating protein 2b).]                                                                                        | Cytosolic             |
| Q8WWN8         | [Centaurin-delta 3 (Cnt-d3) (Arf-GAP, Rho-GAP, ankyrin repeat and, pleckstrin homology domain-containing protein 3).]                                                              | Cytosolic             |
| Q9Y408         | Putative uncharacterized protein DKFZp566D133 (Fragment).                                                                                                                          | Cytosolic             |
| Q14164         | [Inhibitor of nuclear factor kappa-B kinase subunit epsilon, (EC 2.7.11.10) (I kappa-B kinase epsilon) (IkbKE) (IKK-epsilon) (IKK-, E) (Inducible I kappa-B kinase) (IKK-i).]      | Cytosolic             |
| Q92876         | [Kallikrein-6 precursor (EC 3.4.21.-) (Protease M) (Neurosin) (Zyme), (SP59) (Serine protease 9) (Serine protease 18).]                                                            | Cytosolic             |
| Q9BQ85         | [Zinc finger protein 655 (Zinc finger protein 655, isoform CRA_b) (Vav-, 1 interacting Kruppel-like protein) (Putative uncharacterized protein, VIK).]                             | Cytosolic             |
| P00966         | [Argininosuccinate synthase (EC 6.3.4.5) (Citrulline--aspartate, ligase).]                                                                                                         | Cytosolic             |
| Q86US8         | [Telomerase-binding protein EST1A (EC 3.1.-.-) (Ever shorter telomeres, 1A) (Telomerase subunit EST1A) (EST1-like protein A) (Smg-6 homolog), (hSmg5/7a).]                         | Cytosolic             |
| Q6IE81         | Protein Jade-1 (PHD finger protein 17).                                                                                                                                            | Cytosolic             |
| Q9Y314         | Nitric oxide synthase-interacting protein (eNOS-interacting protein).                                                                                                              | Cytosolic             |
| P49454         | [Centromere protein F (Kinetochore protein CENP-F) (Mitosin) (AH, antigen).]                                                                                                       | Cytosolic             |
| P37198         | Nuclear pore glycoprotein p62 (62 kDa nucleoporin).                                                                                                                                | Cytosolic             |
| P54136         | [Arginyl-tRNA synthetase, cytoplasmic (EC 6.1.1.19) (Arginine--tRNA, ligase) (ArgRS).]                                                                                             | Cytosolic             |
| O14787         | Transportin-2 (Karyopherin beta-2b).                                                                                                                                               | Cytosolic             |
| Q8NAJ6         | [cDNA FLJ35251 fis, clone PROST2003635, weakly similar to, MULTIFUNCTIONAL AMINOACYL-TRNA SYNTHETASE.]                                                                             | Cytosolic             |
| Q9C0D4         | KIAA1729 protein (Fragment).                                                                                                                                                       | Cytosolic             |

|        |                                                                                                                                                                                                                                       |               |
|--------|---------------------------------------------------------------------------------------------------------------------------------------------------------------------------------------------------------------------------------------|---------------|
| Q12830 | [Nucleosome-remodeling factor subunit BPTF (Bromodomain and PHD finger-, containing transcription factor) (Fetal Alzheimer antigen) (Fetal Alz-, 50 clone 1 protein).]                                                                | Cytosolic     |
| P57075 | [Suppressor of T-cell receptor signaling 2 (STS-2) (Cbl-interacting, protein 4) (CLIP4) (T-cell ubiquitin ligand) (TULA).]                                                                                                            | Cytosolic     |
| O75312 | Zinc finger protein ZPR1 (Zinc finger protein 259).                                                                                                                                                                                   | Cytosolic     |
| P68402 | [Platelet-activating factor acetylhydrolase IB subunit beta, (EC 3.1.1.47) (PAF acetylhydrolase 30 kDa subunit) (PAF-AH 30 kDa, subunit) (PAF-AH subunit beta) (PAFAH subunit beta).]                                                 | Cytosolic     |
| Q96A65 | Exocyst complex component 4 (Exocyst complex component Sec8).                                                                                                                                                                         | Cytosolic     |
| Q12799 | T-complex protein 10A homolog.                                                                                                                                                                                                        | Cytosolic     |
| Q8N632 | Sphingosine kinase 1 (Sphingosine kinase 1, isoform CRA_b).                                                                                                                                                                           | Cytosolic     |
| P05771 | Protein kinase C beta type (EC 2.7.11.13) (PKC-beta) (PKC-B).                                                                                                                                                                         | Cytosolic     |
| Q13217 | [DnaJ homolog subfamily C member 3 (Interferon-induced, double-stranded, RNA-activated protein kinase inhibitor) (Protein kinase inhibitor p58), (Protein kinase inhibitor of 58 kDa).]                                               | Cytosolic     |
| Q9NQ66 | [1-phosphatidylinositol-4,5-bisphosphate phosphodiesterase beta-1, (EC 3.1.4.11) (Phosphoinositide phospholipase C) (Phospholipase C-, beta-1) (PLC-beta-1) (PLC-I) (PLC-154).]                                                       | Cytosolic     |
| P35228 | [Nitric oxide synthase, inducible (EC 1.14.13.39) (NOS type II), (Inducible NO synthase) (Inducible NOS) (iNOS) (Hepatocyte NOS) (HEP-, NOS).]                                                                                        | Cytosolic     |
| P08294 | [Extracellular superoxide dismutase [Cu-Zn] precursor (EC 1.15.1.1), (EC-SOD).]                                                                                                                                                       | Cytosolic     |
| Q9BYN0 | Sulfiredoxin-1 (EC 1.8.98.2).                                                                                                                                                                                                         | Cytosolic     |
| P11413 | Glucose-6-phosphate 1-dehydrogenase (EC 1.1.1.49) (G6PD).                                                                                                                                                                             | Cytosolic     |
| P02649 | Apolipoprotein E precursor (Apo-E).                                                                                                                                                                                                   | Cytosolic     |
| P29074 | [Tyrosine-protein phosphatase non-receptor type 4 (EC 3.1.3.48), (Protein-tyrosine phosphatase MEG1) (PTPase-MEG1) (MEG).]                                                                                                            | Cytosolic     |
| Q9UNH7 | Sorting nexin-6 (TRAF4-associated factor 2).                                                                                                                                                                                          | Cytosolic     |
| Q15652 | [Probable JmjC domain-containing histone demethylation protein 2C, (EC 1.14.11.-) (Jumonji domain-containing protein 1C) (Thyroid, receptor-interacting protein 8) (TRIP-8).]                                                         | Cytosolic     |
| Q9UN86 | [Ras GTPase-activating protein-binding protein 2 (G3BP-2) (GAP SH3, domain-binding protein 2).]                                                                                                                                       | Cytosolic     |
| P08708 | 40S ribosomal protein S17.                                                                                                                                                                                                            | Cytosolic     |
| Q9BUP3 | [Oxidoreductase HTATIP2 (EC 1.1.1.-) (HIV-1 TAT-interactive protein 2), (30 kDa HIV-1 TAT-interacting protein).]                                                                                                                      | Cytosolic     |
| P13667 | [Protein disulfide-isomerase A4 precursor (EC 5.3.4.1) (Protein ERp-72), (ERp72).]                                                                                                                                                    | ER            |
| P56557 | Transmembrane protein 50B (HCV p7-trans-regulated protein 3).                                                                                                                                                                         | ER            |
| P20774 | Mimecan precursor (Osteoglycin) (Osteoinductive factor) (OIF).                                                                                                                                                                        | ER            |
| Q99442 | Translocation protein SEC62 (Translocation protein 1) (TP-1) (hTP-1).                                                                                                                                                                 | ER            |
| P02647 | [Apolipoprotein A-I precursor (Apo-AI) (ApoA-I) [Contains:, Apolipoprotein A-I(1-242)].]                                                                                                                                              | Extracellular |
| P04003 | [C4b-binding protein alpha chain precursor (C4bp) (Proline-rich, protein) (PRP).]                                                                                                                                                     | Extracellular |
| P01597 | Ig kappa chain V-I region DEE.                                                                                                                                                                                                        | Extracellular |
| P01620 | Ig kappa chain V-III region SIE.                                                                                                                                                                                                      | Extracellular |
| P80748 | Ig lambda chain V-III region LOI.                                                                                                                                                                                                     | Extracellular |
| Q99435 | [Protein kinase C-binding protein NELL2 precursor (NEL-like protein 2), (Nel-related protein 2).]                                                                                                                                     | Extracellular |
| P01009 | [Alpha-1-antitrypsin precursor (Alpha-1 protease inhibitor) (Alpha-1-, antiproteinase).]                                                                                                                                              | Extracellular |
| P01042 | [Kininogen-1 precursor (Alpha-2-thiol proteinase inhibitor) [Contains:, Kininogen-1 heavy chain; Bradykinin (Kallidin I); Lysyl-bradykinin, (Kallidin II); Kininogen-1 light chain; Low molecular weight growth-, promoting factor].] | Extracellular |
| P01606 | Ig kappa chain V-I region OU.                                                                                                                                                                                                         | Extracellular |
| P02774 | [Vitamin D-binding protein precursor (DBP) (Group-specific component), (Gc-globulin) (VDB).]                                                                                                                                          | Extracellular |

|        |                                                                                                                                                                                                                                                                                                                                                                                                |               |
|--------|------------------------------------------------------------------------------------------------------------------------------------------------------------------------------------------------------------------------------------------------------------------------------------------------------------------------------------------------------------------------------------------------|---------------|
| P02763 | Alpha-1-acid glycoprotein 1 precursor (AGP 1) (Orosomuroid-1) (OMD 1).                                                                                                                                                                                                                                                                                                                         | Extracellular |
| P02790 | Hemopexin precursor (Beta-1B-glycoprotein).                                                                                                                                                                                                                                                                                                                                                    | Extracellular |
| P01766 | Ig heavy chain V-III region BRO.                                                                                                                                                                                                                                                                                                                                                               | Extracellular |
| P01593 | Ig kappa chain V-I region AG.                                                                                                                                                                                                                                                                                                                                                                  | Extracellular |
| P10451 | [Osteopontin precursor (Bone sialoprotein 1) (Secreted phosphoprotein, 1) (SPP-1) (Urinary stone protein) (Nephropontin) (Uropontin).]                                                                                                                                                                                                                                                         | Extracellular |
| P04004 | [Vitronectin precursor (Serum-spreading factor) (S-protein) (V75), [Contains: Vitronectin V65 subunit; Vitronectin V10 subunit;, Somatomedin-B].]                                                                                                                                                                                                                                              | Extracellular |
| P19652 | Alpha-1-acid glycoprotein 2 precursor (AGP 2) (Orosomuroid-2) (OMD 2).                                                                                                                                                                                                                                                                                                                         | Extracellular |
| P02750 | Leucine-rich alpha-2-glycoprotein precursor (LRG).                                                                                                                                                                                                                                                                                                                                             | Extracellular |
| P02766 | Transthyretin precursor (Prealbumin) (TBPA) (TTR) (ATTR).                                                                                                                                                                                                                                                                                                                                      | Extracellular |
| P08603 | Complement factor H precursor (H factor 1).                                                                                                                                                                                                                                                                                                                                                    | Extracellular |
| P04196 | [Histidine-rich glycoprotein precursor (Histidine-proline-rich, glycoprotein) (HPRG).]                                                                                                                                                                                                                                                                                                         | Extracellular |
| P04217 | Alpha-1B-glycoprotein precursor (Alpha-1-B glycoprotein).                                                                                                                                                                                                                                                                                                                                      | Extracellular |
| P43652 | Afamin precursor (Alpha-albumin) (Alpha-Alb).                                                                                                                                                                                                                                                                                                                                                  | Extracellular |
| P02749 | [Beta-2-glycoprotein 1 precursor (Beta-2-glycoprotein I), (Apolipoprotein H) (Apo-H) (B2GPI) (Beta(2)GPI) (Activated protein C-, binding protein) (APC inhibitor) (Anticardiolipin cofactor).]                                                                                                                                                                                                 | Extracellular |
| P02747 | Complement C1q subcomponent subunit C precursor.                                                                                                                                                                                                                                                                                                                                               | Extracellular |
| P10909 | [Clusterin precursor (Complement-associated protein SP-40,40), (Complement cytolysis inhibitor) (CLI) (NA1/NA2) (Apolipoprotein J), (Apo-J) (Testosterone-repressed prostate message 2) (TRPM-2), [Contains: Clusterin beta chain (ApoJalpha) (Complement cytolysis, inhibitor a chain); Clusterin alpha chain (ApoJbeta) (Complement, cytolysis inhibitor b chain)].]                         | Extracellular |
| Q9UBP4 | Dickkopf-related protein 3 precursor (Dkk-3) (Dickkopf-3) (hDkk-3).                                                                                                                                                                                                                                                                                                                            | Extracellular |
| O00587 | [Beta-1,3-N-acetylglucosaminyltransferase manic fringe (EC 2.4.1.222), (O-fucosylpeptide 3-beta-N-acetylglucosaminyltransferase).]                                                                                                                                                                                                                                                             | Extracellular |
| P04279 | [Semenogelin-1 precursor (Semenogelin I) (SGI) [Contains: Alpha-, inhibin-92; Alpha-inhibin-31; Seminal basic protein].]                                                                                                                                                                                                                                                                       | Extracellular |
| P02765 | [Alpha-2-HS-glycoprotein precursor (Fetuin-A) (Alpha-2-Z-globulin) (Ba-, alpha-2-glycoprotein) [Contains: Alpha-2-HS-glycoprotein chain A;, Alpha-2-HS-glycoprotein chain B].]                                                                                                                                                                                                                 | Extracellular |
| P41222 | [Prostaglandin-H2 D-isomerase precursor (EC 5.3.99.2) (Lipocalin-type, prostaglandin-D synthase) (Glutathione-independent PGD synthetase), (Prostaglandin-D2 synthase) (PGD2 synthase) (PGDS2) (PGDS) (Beta-trace, protein) (Cerebrin-28).]                                                                                                                                                    | Extracellular |
| O00584 | Ribonuclease T2 precursor (EC 3.1.27.-) (Ribonuclease 6).                                                                                                                                                                                                                                                                                                                                      | Extracellular |
| P00450 | Ceruloplasmin precursor (EC 1.16.3.1) (Ferroxidase).                                                                                                                                                                                                                                                                                                                                           | Extracellular |
| P07711 | [Cathepsin L precursor (EC 3.4.22.15) (Major excreted protein) (MEP), [Contains: Cathepsin L heavy chain; Cathepsin L light chain].]                                                                                                                                                                                                                                                           | Extracellular |
| Q53F31 | [Vitamin D-binding protein variant (Group-specific component) (Vitamin, D binding protein) (Fragment).]                                                                                                                                                                                                                                                                                        | Extracellular |
| P07602 | [Proactivator polypeptide precursor [Contains: Saposin-A (Protein A);, Saposin-B-Val; Saposin-B (Sphingolipid activator protein 1) (SAP-1), (Cerebroside sulfate activator) (CSAct) (Dispersin) (Sulfatide/GM1, activator); Saposin-C (Co-beta-glucosidase) (A1 activator), (Glucosylceramidase activator) (Sphingolipid activator protein 2), (SAP-2); Saposin-D (Protein C) (Component C)].] | Extracellular |
| P13521 | [Secretogranin-2 precursor (Secretogranin II) (SgII) (Chromogranin-C), [Contains: Secretoneurin (SN)].]                                                                                                                                                                                                                                                                                        | Extracellular |
| P02768 | Serum albumin precursor.                                                                                                                                                                                                                                                                                                                                                                       | Extracellular |
| P01011 | [Alpha-1-antichymotrypsin precursor (ACT) (Cell growth-inhibiting gene, 24/25 protein) [Contains: Alpha-1-antichymotrypsin His-Pro-less].]                                                                                                                                                                                                                                                     | Extracellular |
| P06727 | Apolipoprotein A-IV precursor (Apo-AIV) (ApoA-IV).                                                                                                                                                                                                                                                                                                                                             | Extracellular |
| Q92520 | Protein FAM3C precursor (Protein GS3786).                                                                                                                                                                                                                                                                                                                                                      | Extracellular |

|        |                                                                                                                                                                                                                                                                                                             |                        |
|--------|-------------------------------------------------------------------------------------------------------------------------------------------------------------------------------------------------------------------------------------------------------------------------------------------------------------|------------------------|
| P07477 | [Trypsin-1 precursor (EC 3.4.21.4) (Trypsin I) (Cationic trypsinogen), (Serine protease 1).]                                                                                                                                                                                                                | Extracellular          |
| Q8IUK7 | ALB protein.                                                                                                                                                                                                                                                                                                | Extracellular          |
| P36955 | [Pigment epithelium-derived factor precursor (PEDF) (Serpin-F1) (EPC-, 1).]                                                                                                                                                                                                                                 | Extracellular          |
| Q9UHG2 | [ProSAAS precursor (pro-SAAS) (Proprotein convertase subtilisin/kexin, type 1 inhibitor) (Proprotein convertase 1 inhibitor) [Contains: KEP;, Big SAAS (b-SAAS); Little SAAS (l-SAAS) (N-proSAAS); Big PEN-LEN (b-, PEN-LEN) (SAAS CT(1-49)); PEN; Little LEN (l-LEN); Big LEN (b-LEN), (SAAS CT(25-40))].] | Extracellular          |
| P01023 | Alpha-2-macroglobulin precursor (Alpha-2-M).                                                                                                                                                                                                                                                                | Extracellular          |
| P05155 | [Plasma protease C1 inhibitor precursor (C1 Inh) (C1Inh) (C1 esterase, inhibitor) (C1-inhibiting factor).]                                                                                                                                                                                                  | Extracellular          |
| Q6U2F8 | C4A91 (C4A) (Fragment).                                                                                                                                                                                                                                                                                     | Extracellular          |
| P01019 | [Angiotensinogen precursor (Serp A8) [Contains: Angiotensin-1, (Angiotensin I) (Ang I); Angiotensin-2 (Angiotensin II) (Ang II);, Angiotensin-3 (Angiotensin III) (Ang III) (Des-Asp[1]-angiotensin, II)].]                                                                                                 | Extracellular          |
| P23142 | Fibulin-1 precursor.                                                                                                                                                                                                                                                                                        | Extracellular          |
| P05090 | Apolipoprotein D precursor (Apo-D) (ApoD).                                                                                                                                                                                                                                                                  | Extracellular          |
| P02652 | [Apolipoprotein A-II precursor (Apo-AII) (ApoA-II) [Contains:, Apolipoprotein A-II(1-76)].]                                                                                                                                                                                                                 | Extracellular          |
| Q9Y272 | [Dexamethasone-induced Ras-related protein 1 precursor (Activator of G-, protein signaling 1).]                                                                                                                                                                                                             | Go Component not found |
| Q75154 | [Rab11 family-interacting protein 3 (Rab11-FIP3) (EF hands-containing, Rab-interacting protein) (Eferin).]                                                                                                                                                                                                  | Go Component not found |
| P30154 | [Serine/threonine-protein phosphatase 2A 65 kDa regulatory subunit A, beta isoform (PP2A, subunit A, PR65-beta isoform) (PP2A, subunit A., R1-beta isoform).]                                                                                                                                               | Go Component not found |
| Q16671 | [Anti-Muellerian hormone type-2 receptor precursor (EC 2.7.11.30), (Anti-Muellerian hormone type II receptor) (AMH type II receptor) (MIS, type II receptor) (MISRII) (MRII).]                                                                                                                              | Go Component not found |
| O96020 | G1/S-specific cyclin-E2.                                                                                                                                                                                                                                                                                    | Go Component not found |
| P00751 | [Complement factor B precursor (EC 3.4.21.47) (C3/C5 convertase), (Properdin factor B) (Glycine-rich beta glycoprotein) (GBG) (PBF2), [Contains: Complement factor B Ba fragment; Complement factor B Bb, fragment].]                                                                                       | Go Component not found |
| Q92828 | Coronin-2A (WD repeat-containing protein 2) (IR10).                                                                                                                                                                                                                                                         | Go Component not found |
| Q01804 | OTU domain-containing protein 4 (HIV-1-induced protein HIN-1).                                                                                                                                                                                                                                              | Go Component not found |
| Q16270 | [Insulin-like growth factor-binding protein 7 precursor (IGFBP-7) (IBP-, 7) (IGF-binding protein 7) (MAC25 protein) (Prostacyclin-stimulating, factor) (PGI2-stimulating factor) (IGFBP-rP1).]                                                                                                              | Go Component not found |
| O14974 | [Protein phosphatase 1 regulatory subunit 12A (Myosin phosphatase-, targeting subunit 1) (Myosin phosphatase target subunit 1) (Protein, phosphatase myosin-binding subunit).]                                                                                                                              | Go Component not found |
| O15047 | [Histone-lysine N-methyltransferase, H3 lysine-4 specific SET1, (EC 2.1.1.43) (Set1/Ash2 histone methyltransferase complex subunit, SET1) (SET domain-containing protein 1A).]                                                                                                                              | Go Component not found |
| Q58HN0 | Programmed cell death 2 isoform 1.                                                                                                                                                                                                                                                                          | Go Component not found |
| Q8NF20 | FLJ00382 protein (Fragment).                                                                                                                                                                                                                                                                                | Go Component not found |
| Q9NSN6 | Putative uncharacterized protein DKFZp761O0113.                                                                                                                                                                                                                                                             | Go Component not found |
| Q8NE71 | [ATP-binding cassette sub-family F member 1 (ATP-binding cassette 50), (TNF-alpha-stimulated ABC protein).]                                                                                                                                                                                                 | Go Component not found |
| Q9NZN5 | [Rho guanine nucleotide exchange factor 12 (Leukemia-associated, RhoGEF).]                                                                                                                                                                                                                                  | Go Component not found |
| P05937 | [Calbindin (Vitamin D-dependent calcium-binding protein, avian-type), (Calbindin D28) (D-28K).]                                                                                                                                                                                                             | Go Component not found |
| P46013 | Antigen KI-67.                                                                                                                                                                                                                                                                                              | Go Component not found |
| P01842 | Ig lambda chain C regions.                                                                                                                                                                                                                                                                                  | Go Component not found |
| Q8WTW4 | [Tumor suppressor candidate 4 (NPR2-like) (Gene 21 protein) (G21, protein).]                                                                                                                                                                                                                                | Go Component not found |
| Q8N720 | Zinc finger protein 655 (Vav-interacting Krueppel-like protein).                                                                                                                                                                                                                                            | Go Component not found |



|        |                                                                                                                                                                                                                                      |                        |
|--------|--------------------------------------------------------------------------------------------------------------------------------------------------------------------------------------------------------------------------------------|------------------------|
| Q8N1V2 | [WD repeat-containing protein 16 (WD40-repeat protein up-regulated in, HCC).]                                                                                                                                                        | Go Component not found |
| Q9Y4W2 | LAS1-like protein.                                                                                                                                                                                                                   | Go Component not found |
| Q8NB16 | Mixed lineage kinase domain-like protein.                                                                                                                                                                                            | Go Component not found |
| Q8TDL7 | Spermatogenesis associated factor.                                                                                                                                                                                                   | Go Component not found |
| Q96BE9 | CDK4 protein (Cyclin-dependent kinase 4, isoform CRA_c).                                                                                                                                                                             | Go Component not found |
| P61769 | [Beta-2-microglobulin precursor [Contains: Beta-2-microglobulin form pl, 5.3].]                                                                                                                                                      | Go Component not found |
| O00512 | B-cell lymphoma 9 protein (Bcl-9) (Legless homolog).                                                                                                                                                                                 | Go Component not found |
| Q13045 | Protein flightless-1 homolog.                                                                                                                                                                                                        | Go Component not found |
| P35527 | [Keratin, type I cytoskeletal 9 (Cytokeratin-9) (CK-9) (Keratin-9), (K9).]                                                                                                                                                           | Go Component not found |
| P42679 | [Megakaryocyte-associated tyrosine-protein kinase (EC 2.7.10.2), (Tyrosine-protein kinase CTK) (Protein kinase HYL) (Hematopoietic, consensus tyrosine-lacking kinase).]                                                             | Go Component not found |
| Q5JUW7 | [Discs, large homolog 3 (Neuroendocrine-dlg, Drosophila) (Discs, large, homolog 3 (Neuroendocrine-dlg, Drosophila), isoform CRA_d).]                                                                                                 | Go Component not found |
| Q96AJ1 | Clusterin-associated protein 1.                                                                                                                                                                                                      | Go Component not found |
| Q6NUP7 | KIAA1622 (KIAA1622, isoform CRA_a).                                                                                                                                                                                                  | Go Component not found |
| Q8N774 | CDNA FLJ25966 fis, clone TST05207.                                                                                                                                                                                                   | Go Component not found |
| Q9H0J4 | Glutamine-rich protein 2.                                                                                                                                                                                                            | Go Component not found |
| Q7Z2E3 | [Aprataxin (EC 3.-.-) (Forkhead-associated domain histidine triad-, like protein) (FHA-HIT).]                                                                                                                                        | Go Component not found |
| P38935 | [DNA-binding protein SMUBP-2 (EC 3.6.1.-) (ATP-dependent helicase, IGHMBP2) (Immunoglobulin mu-binding protein 2) (SMUBP-2) (Glial factor, 1) (GF-1).]                                                                               | Go Component not found |
| Q5VZL5 | Zinc finger MYM-type protein 4 (Zinc finger protein 262).                                                                                                                                                                            | Go Component not found |
| O00172 | Line-1 reverse transcriptase (Fragment).                                                                                                                                                                                             | Go Component not found |
| Q9H040 | [Putative uncharacterized protein DKFz547N043 (Chromosome 1 open, reading frame 124) (CDNA FLJ14707 fis, clone NT2RP3000599).]                                                                                                       | Go Component not found |
| P51816 | [AF4/FMR2 family member 2 (Fragile X mental retardation 2 protein), (Protein FMR-2) (FMR2P) (Protein Ox19) (Fragile X E mental retardation, syndrome protein).]                                                                      | Go Component not found |
| Q96NS5 | Ankyrin repeat and SOCS box protein 16 (ASB-16).                                                                                                                                                                                     | Go Component not found |
| P59510 | [ADAMTS-20 precursor (EC 3.4.24.-) (A disintegrin and metalloproteinase, with thrombospondin motifs 20) (ADAM-TS 20) (ADAM-TS20).]                                                                                                   | Go Component not found |
| P19022 | [Cadherin-2 precursor (Neural cadherin) (N-cadherin) (CD325 antigen), (CDw325).]                                                                                                                                                     | Go Component not found |
| Q9P209 | Centrosomal protein of 72 kDa (Cep72 protein).                                                                                                                                                                                       | Go Component not found |
| Q8WUY3 | Prune homolog 2.                                                                                                                                                                                                                     | Go Component not found |
| P10645 | [Chromogranin-A precursor (CgA) (Pituitary secretory protein I) (SP-I), [Contains: Vasostatin-1 (Vasostatin I); Vasostatin-2 (Vasostatin II);, EA-92; ES-43; Pancreastatin; SS-18; WA-8; WE-14; LF-19; AL-11; GV-19; GR-44; ER-37].] | Go Component not found |
| Q96M20 | Uncharacterized protein C20orf152.                                                                                                                                                                                                   | Go Component not found |
| Q8TBR7 | Protein FAM57A (CT120 protein).                                                                                                                                                                                                      | Go Component not found |
| Q9P121 | Neurotrimin precursor (hNT).                                                                                                                                                                                                         | Go Component not found |
| Q8NDF8 | [PAP-associated domain-containing protein 5 (EC 2.7.7.-), (Topoisomerase-related function protein 4-2) (TRF4-2).]                                                                                                                    | Go Component not found |
| P16499 | [Rod cGMP-specific 3',5'-cyclic phosphodiesterase subunit alpha, (EC 3.1.4.35) (GMP-PDE alpha) (PDE V-B1).]                                                                                                                          | Go Component not found |
| P17257 | UPF0484 protein C1orf90 homolog (Protein SEC).                                                                                                                                                                                       | Go Component not found |

|        |                                                                                                                                                                                                                                                                                                         |                        |
|--------|---------------------------------------------------------------------------------------------------------------------------------------------------------------------------------------------------------------------------------------------------------------------------------------------------------|------------------------|
| O15389 | [Sialic acid-binding Ig-like lectin 5 precursor (Siglec-5) (Obesity-, binding protein 2) (OB-binding protein 2) (OB-BP2) (CD33 antigen-like, 2) (CD170 antigen).]                                                                                                                                       | Go Component not found |
| Q96P15 | Serpin B11.                                                                                                                                                                                                                                                                                             | Go Component not found |
| P59817 | [Suppressor of hairy wing homolog 1 (3'OY11.1) (Zinc finger protein, 280).]                                                                                                                                                                                                                             | Go Component not found |
| O95932 | [Protein-glutamine gamma-glutamyltransferase 6 (EC 2.3.2.13), (Transglutaminase-3-like) (TGase-3-like) (Transglutaminase Y).]                                                                                                                                                                           | Go Component not found |
| Q96QT4 | [Transient receptor potential cation channel subfamily M member 7, (EC 2.7.11.1) (Long transient receptor potential channel 7) (LTrpC7), (Channel-kinase 1).]                                                                                                                                           | Go Component not found |
| Q9ULK2 | Ataxin-7-like protein 1.                                                                                                                                                                                                                                                                                | Go Component not found |
| Q9POL1 | [Zinc finger protein 167 (Zinc finger protein 64) (Zinc finger protein, 448) (ZFP) (Zinc finger protein with KRAB and SCAN domains 7).]                                                                                                                                                                 | Go Component not found |
| Q9NYT6 | Zinc finger protein 226.                                                                                                                                                                                                                                                                                | Go Component not found |
| Q15786 | Testis calpastatin.                                                                                                                                                                                                                                                                                     | Go Component not found |
| Q5EFE6 | Anti-RhD monoclonal T125 kappa light chain precursor.                                                                                                                                                                                                                                                   | Go Component not found |
| Q5HY16 | Putative uncharacterized protein DKFZp313O2236 (Fragment).                                                                                                                                                                                                                                              | Go Component not found |
| Q9ULE6 | Paladin.                                                                                                                                                                                                                                                                                                | Go Component not found |
| Q5JWS2 | ERGIC and golgi 3 (Fragment).                                                                                                                                                                                                                                                                           | Go Component not found |
| Q9Y216 | Ninein-like protein.                                                                                                                                                                                                                                                                                    | Go Component not found |
| Q4LE39 | [AT-rich interactive domain-containing protein 4B (ARID domain-, containing protein 4B) (Histone deacetylase complex subunit SAP180), (180 kDa Sin3-associated polypeptide) (Sin3-associated polypeptide, p180) (Retinoblastoma-binding protein 1-like 1) (Breast cancer-, associated antigen BRCAA1).] | Go Component not found |
| Q68CQ1 | Uncharacterized protein C1orf175.                                                                                                                                                                                                                                                                       | Go Component not found |
| Q9H3W5 | [Leucine-rich repeat neuronal protein 3 precursor (Neuronal leucine-, rich repeat protein 3) (NLRR-3).]                                                                                                                                                                                                 | Go Component not found |
| Q7L3V2 | Uncharacterized protein C22orf29.                                                                                                                                                                                                                                                                       | Go Component not found |
| Q6N030 | Putative uncharacterized protein DKFZp686l15212.                                                                                                                                                                                                                                                        | Go Component not found |
| Q6P1N9 | [TatD DNase domain-containing protein 1 (Hepatocarcinoma high, expression protein).]                                                                                                                                                                                                                    | Go Component not found |
| Q4G0Z9 | Uncharacterized protein C8orf45.                                                                                                                                                                                                                                                                        | Go Component not found |
| Q6PIU1 | [Potassium voltage-gated channel subfamily V member 1 (Voltage-gated, potassium channel subunit Kv8.1) (Neuronal potassium channel alpha, subunit HNKA).]                                                                                                                                               | Go Component not found |
| Q6UTX4 | Putative uncharacterized protein.                                                                                                                                                                                                                                                                       | Go Component not found |
| Q6ZNH7 | [CDNA FLJ16074 fis, clone LIVER2000247, weakly similar to RENAL, SODIUM/DICARBOXYLATE COTRANSPORTER.]                                                                                                                                                                                                   | Go Component not found |
| Q6ZNS0 | CDNA FLJ27256 fis, clone SYN09689.                                                                                                                                                                                                                                                                      | Go Component not found |
| Q6ZTQ6 | CDNA FLJ44356 fis, clone TRACH3006889.                                                                                                                                                                                                                                                                  | Go Component not found |
| Q6ZUT9 | CDNA FLJ43333 fis, clone NT2RI3006376.                                                                                                                                                                                                                                                                  | Go Component not found |
| Q6ZVL3 | [CDNA FLJ42424 fis, clone BLADE2004089, moderately similar to Mus, musculus PDZ domain actin binding protein Shroom mRNA. (Fragment).]                                                                                                                                                                  | Go Component not found |
| Q14C87 | [Transmembrane protein 132D precursor (Mature oligodendrocytes, transmembrane protein) (Mature OL transmembrane protein).]                                                                                                                                                                              | Go Component not found |
| Q7Z766 | LOC492303 protein.                                                                                                                                                                                                                                                                                      | Go Component not found |
| Q86YA3 | Uncharacterized protein C4orf21.                                                                                                                                                                                                                                                                        | Go Component not found |
| Q8IUW3 | [Spermatogenesis-associated protein 2-like protein (SPATA2-like, protein).]                                                                                                                                                                                                                             | Go Component not found |
| Q9Y4B5 | Uncharacterized protein KIAA0802.                                                                                                                                                                                                                                                                       | Go Component not found |
| Q8IYM2 | Schlafen family member 12.                                                                                                                                                                                                                                                                              | Go Component not found |
| Q8NOV7 | CDNA FLJ40969 fis, clone UTERU2012688 (CDNA FLJ40984 fis).                                                                                                                                                                                                                                              | Go Component not found |

|        |                                                                                                                                                                                                                                        |                        |
|--------|----------------------------------------------------------------------------------------------------------------------------------------------------------------------------------------------------------------------------------------|------------------------|
| Q8N4V6 | TMEM181 protein (Fragment).                                                                                                                                                                                                            | Go Component not found |
| Q5T124 | [UBX domain-containing protein 5 (Socius) (Colorectal tumor-associated, antigen COA-1).]                                                                                                                                               | Go Component not found |
| Q8NAS4 | [CDNA FLJ34863 fis, clone NT2NE2014013, moderately similar to, SEMAPHORIN 3B.]                                                                                                                                                         | Go Component not found |
| Q8TBR0 | PDE4DIP protein.                                                                                                                                                                                                                       | Go Component not found |
| Q969F2 | Protein naked cuticle homolog 2 (hNkd2) (Naked-2).                                                                                                                                                                                     | Go Component not found |
| Q96ET8 | Protein FAM18B2.                                                                                                                                                                                                                       | Go Component not found |
| Q96JD0 | Amyloid lambda 6 light chain variable region SAR (Fragment).                                                                                                                                                                           | Go Component not found |
| Q96LR2 | Uncharacterized protein C1orf190.                                                                                                                                                                                                      | Go Component not found |
| Q9BRD0 | BUD13 homolog.                                                                                                                                                                                                                         | Go Component not found |
| Q9BSH9 | MGC31957 protein.                                                                                                                                                                                                                      | Go Component not found |
| Q96JA3 | [Pleckstrin homology domain-containing family A member 8, (Phosphoinositol 4-phosphate adapter protein 2) (Phosphatidylinositol-, four-phosphate adapter protein 2) (hFAPP2) (Serologically defined, breast cancer antigen NY-BR-86).] | Go Component not found |
| Q9H024 | Putative uncharacterized protein DKFZp547J036 (ELAVL3 protein).                                                                                                                                                                        | Go Component not found |
| Q9H3S5 | [GPI mannosyltransferase 1 (EC 2.4.1.-) (GPI mannosyltransferase I), (GPI-MT-I) (Phosphatidylinositol-glycan biosynthesis class M protein), (PIG-M).]                                                                                  | Go Component not found |
| Q9H799 | CDNA: FLJ21126 fis, clone CAS06183. (Fragment).                                                                                                                                                                                        | Go Component not found |
| Q8TC05 | Nuclear protein MDM1.                                                                                                                                                                                                                  | Go Component not found |
| Q9ULS2 | KIAA1148 protein (Fragment).                                                                                                                                                                                                           | Go Component not found |
| Q2M389 | Uncharacterized protein KIAA1033.                                                                                                                                                                                                      | Go Component not found |
| Q9Y6L7 | Tolloid-like protein 2 precursor (EC 3.4.24.-).                                                                                                                                                                                        | Go Component not found |
| Q30134 | [HLA class II histocompatibility antigen, DRB1*8 beta chain precursor, (MHC class I antigen DRB1*8) (DR-8) (DR8) (DRw8).]                                                                                                              | Go Component not found |
| Q8WWM7 | [Ataxin-2-like protein (Ataxin-2 domain protein) (Ataxin-2-related, protein).]                                                                                                                                                         | Go Component not found |
| Q96P47 | [Centaurin-gamma 3 (ARF-GAP with GTP-binding protein-like, ankyrin, repeat and pleckstrin homology domains 3) (AGAP-3) (MR1-interacting, protein) (MRIP-1) (GRAM-associated GTPase) (CRAG).]                                           | Go Component not found |
| Q5VXU9 | Uncharacterized protein C9orf84.                                                                                                                                                                                                       | Go Component not found |
| Q7Z5M8 | Abhydrolase domain-containing protein 12B.                                                                                                                                                                                             | Go Component not found |
| P0C0L4 | [Complement C4-A precursor (Acidic complement C4) [Contains: Complement, C4 beta chain; Complement C4-A alpha chain; C4a anaphylatoxin; C4b-A.; C4d-A; Complement C4 gamma chain].]                                                    | Go Component not found |
| Q96KN2 | [Beta-Ala-His dipeptidase precursor (EC 3.4.13.20) (Carnosine, dipeptidase 1) (CNDP dipeptidase 1) (Serum carnosinase) (Glutamate, carboxypeptidase-like protein 2).]                                                                  | Go Component not found |
| Q9BZ29 | [Dedicator of cytokinesis protein 9 (Cdc42 guanine nucleotide exchange, factor zizimin-1).]                                                                                                                                            | Go Component not found |
| P18065 | [Insulin-like growth factor-binding protein 2 precursor (IGFBP-2) (IBP-, 2) (IGF-binding protein 2).]                                                                                                                                  | Go Component not found |
| Q9H3R0 | [JmjC domain-containing histone demethylation protein 3C (EC 1.14.11.-), (Jumonji domain-containing protein 2C) (Gene amplified in squamous, cell carcinoma 1 protein) (GASC-1 protein).]                                              | Go Component not found |
| Q96PQ7 | Kelch-like protein 5.                                                                                                                                                                                                                  | Go Component not found |
| Q7Z553 | [MAM domain-containing glycosylphosphatidylinositol anchor protein 2, precursor (MAM domain-containing protein 1).]                                                                                                                    | Go Component not found |
| Q08431 | [Lactadherin precursor (Milk fat globule-EGF factor 8) (MFG-E8) (HMFG), (Breast epithelial antigen BA46) (MFGM) [Contains: Lactadherin short, form; Medin].]                                                                           | Go Component not found |
| Q86W25 | [NACHT, LRR and PYD domains-containing protein 13 (Nucleotide-binding, oligomerization domain protein 14).]                                                                                                                            | Go Component not found |
| Q9UGF6 | Olfactory receptor 5V1 (Olfactory receptor OR6-26) (Hs6M1-21).                                                                                                                                                                         | Go Component not found |
| Q8N3C7 | CAP-Gly domain-containing linker protein 4 (Restin-like protein 2).                                                                                                                                                                    | Go Component not found |

|        |                                                                                                                                  |                        |
|--------|----------------------------------------------------------------------------------------------------------------------------------|------------------------|
| Q9BYH1 | Seizure 6-like protein precursor.                                                                                                | Go Component not found |
| Q14515 | [SPARC-like protein 1 precursor (High endothelial venule protein), (Hevin) (MAST 9).]                                            | Go Component not found |
| Q13277 | Syntaxin-3.                                                                                                                      | Go Component not found |
| Q96BZ9 | TBC1 domain family member 20.                                                                                                    | Go Component not found |
| Q9HCL3 | Zinc finger protein 14 homolog (Zfp-14) (Zinc finger protein 531).                                                               | Go Component not found |
| O15014 | Zinc finger protein 609.                                                                                                         | Go Component not found |
| Q4VC05 | B-cell CLL/lymphoma 7 protein family member A.                                                                                   | Go Component not found |
| Q56UN5 | [SPS1/STE20-related protein kinase YSK4 (EC 2.7.11.1) (Regulated in, COPD, protein kinase).]                                     | Go Component not found |
| Q5CZ79 | Ankyrin repeat domain-containing protein 20B (Fragment).                                                                         | Go Component not found |
| Q5H9L2 | [Transcription elongation factor A protein-like 5 (TCEA-like protein 5), (Transcription elongation factor S-II protein-like 5).] | Go Component not found |
| Q86UY6 | N-acetyltransferase 11 (EC 2.3.1.-).                                                                                             | Go Component not found |
| Q5JUR7 | Uncharacterized protein C13orf27.                                                                                                | Go Component not found |
| Q8NEY1 | [Neuron navigator 1 (Steerin-1) (Pore membrane and/or filament-, interacting-like protein 3) (Unc-53 homolog 1) (unc53H1).]      | Go Component not found |
| Q5T2T0 | Novel protein (Fragment).                                                                                                        | Go Component not found |
| Q5T7N3 | Ankyrin repeat domain-containing protein 38.                                                                                     | Go Component not found |
| Q5VTR2 | [E3 ubiquitin-protein ligase BRE1A (EC 6.3.2.-) (BRE1-A) (hBRE1) (RING, finger protein 20).]                                     | Go Component not found |
| Q5VWN6 | Uncharacterized protein C10orf18.                                                                                                | Go Component not found |
| Q63HM9 | [Phosphatidylinositol-specific phospholipase C X domain-containing, protein 3 (PI-PLC X domain-containing protein 3).]           | Go Component not found |
| Q68CJ6 | Uncharacterized protein C8orf80.                                                                                                 | Go Component not found |
| Q68CZ6 | Uncharacterized protein C4orf15.                                                                                                 | Go Component not found |
| Q6ZXV5 | Transmembrane and TPR repeat-containing protein 3 (Protein SMILE).                                                               | Go Component not found |
| Q6MZQ6 | Putative uncharacterized protein DKFZp686G11190.                                                                                 | Go Component not found |
| Q6N095 | Putative uncharacterized protein DKFZp686K03196.                                                                                 | Go Component not found |
| Q9NS62 | [Thrombospondin type-1 domain-containing protein 1 precursor, (Transmembrane molecule with thrombospondin module).]              | Go Component not found |
| Q6P6B1 | Uncharacterized protein C8orf47.                                                                                                 | Go Component not found |
| Q6SPF0 | Atherin (Sterile alpha motif domain-containing protein 1).                                                                       | Go Component not found |
| Q6UWM7 | [Lactase-like protein precursor (Klotho/lactase-phlorizin hydrolase-, related protein).]                                         | Go Component not found |
| Q6ZMZ3 | Nesprin-3.                                                                                                                       | Go Component not found |
| Q6ZNI8 | Uncharacterized protein C1orf84 (Fragment).                                                                                      | Go Component not found |
| Q6ZRH3 | CDNA FLJ46360 fis, clone TEST14049863.                                                                                           | Go Component not found |
| Q6ZU14 | CDNA FLJ44063 fis, clone TEST14035637.                                                                                           | Go Component not found |
| Q6ZV48 | CDNA FLJ42992 fis, clone BRTHA2010608.                                                                                           | Go Component not found |
| Q5THJ4 | Vacuolar protein sorting-associated protein 13D.                                                                                 | Go Component not found |
| Q7Z6G3 | [EF-hand calcium-binding protein 2 (Neuronal calcium-binding protein 2), (Synaptotagmin-interacting protein 2) (Stip-2).]        | Go Component not found |
| Q86TG9 | COL12A1 protein.                                                                                                                 | Go Component not found |
| Q8IVL0 | [Neuron navigator 3 (Steerin-3) (Pore membrane and/or filament-, interacting-like protein 1) (Unc-53 homolog 3) (unc53H3).]      | Go Component not found |
| Q8IWB8 | CCR4-NOT transcription complex, subunit 1.                                                                                       | Go Component not found |
| Q8IYR2 | SET and MYND domain-containing protein 4.                                                                                        | Go Component not found |
| Q8N1K5 | Uncharacterized protein C6orf190.                                                                                                | Go Component not found |
| Q8N412 | [Chromosome 4 open reading frame 37 (Putative uncharacterized protein, MGC46496).]                                               | Go Component not found |

|        |                                                                                                                                                                                   |                        |
|--------|-----------------------------------------------------------------------------------------------------------------------------------------------------------------------------------|------------------------|
| Q96MF7 | [E3 SUMO-protein ligase NSE2 (EC 6.-.-) (Non-structural maintenance, of chromosomes element 2 homolog) (Non-SMC element 2 homolog), (hMMS21).]                                    | Go Component not found |
| Q8N7Q3 | Zinc finger protein 676.                                                                                                                                                          | Go Component not found |
| Q8N9X4 | [CDNA FLJ36112 fis, clone TEST12022023, weakly similar to Bos taurus, Reissner's fiber glycoprotein I mRNA.]                                                                      | Go Component not found |
| Q8NFL6 | Amphiphysin I variant CT4 (Fragment).                                                                                                                                             | Go Component not found |
| Q8WZ27 | Putative uncharacterized protein.                                                                                                                                                 | Go Component not found |
| Q96E03 | Melanoma antigen family A, 2B.                                                                                                                                                    | Go Component not found |
| A6BM72 | [Multiple epidermal growth factor-like domains 11 precursor (Multiple, EGF-like-domains 11).]                                                                                     | Go Component not found |
| Q96LS8 | Uncharacterized protein C2orf48.                                                                                                                                                  | Go Component not found |
| Q96N23 | Uncharacterized protein C12orf55 (Fragment).                                                                                                                                      | Go Component not found |
| Q99908 | BB1 protein.                                                                                                                                                                      | Go Component not found |
| Q9BQ86 | C14orf131 protein.                                                                                                                                                                | Go Component not found |
| Q9BRN9 | [TM2 domain-containing protein 3 precursor (Beta-amyloid-binding, protein-like protein 2) (BBP-like protein 2).]                                                                  | Go Component not found |
| Q9BSK1 | Zinc finger protein 577.                                                                                                                                                          | Go Component not found |
| Q9BUR4 | WD repeat-containing protein 79.                                                                                                                                                  | Go Component not found |
| Q9H609 | Zinc finger protein 576.                                                                                                                                                          | Go Component not found |
| Q9H8H0 | Nucleolar protein 11.                                                                                                                                                             | Go Component not found |
| Q9NRU5 | X 001 protein.                                                                                                                                                                    | Go Component not found |
| Q5VX71 | Sushi domain-containing protein 4 precursor.                                                                                                                                      | Go Component not found |
| Q9NX71 | CDNA FLJ20402 fis, clone KAT00919.                                                                                                                                                | Go Component not found |
| Q8TCC3 | 39S ribosomal protein L30, mitochondrial precursor (L30mt) (MRP-L30).                                                                                                             | Go Component not found |
| Q9UL88 | Myosin-reactive immunoglobulin heavy chain variable region (Fragment).                                                                                                            | Go Component not found |
| Q9UNZ4 | NPD002.                                                                                                                                                                           | Go Component not found |
| Q9BX69 | Caspase recruitment domain-containing protein 6.                                                                                                                                  | Go Component not found |
| Q5T5N4 | Uncharacterized protein C6orf118.                                                                                                                                                 | Go Component not found |
| Q96E09 | Protein FAM122A.                                                                                                                                                                  | Go Component not found |
| P0COL5 | [Complement C4-B precursor (Basic complement C4) [Contains: Complement, C4 beta chain; Complement C4-B alpha chain; C4a anaphylatoxin; C4b-B; C4d-B; Complement C4 gamma chain].] | Go Component not found |
| O94985 | Calsyntenin-1 precursor.                                                                                                                                                          | Go Component not found |
| Q13769 | [THO complex subunit 5 homolog (NF2/meningioma region protein pK1.3), (Placental protein 39.2).]                                                                                  | Go Component not found |
| Q9BTC0 | [Death-inducer obliterator 1 (DIO-1) (Death-associated transcription, factor 1) (DATF-1) (hDido1).]                                                                               | Go Component not found |
| P24592 | [Insulin-like growth factor-binding protein 6 precursor (IGFBP-6) (IBP-, 6) (IGF-binding protein 6).]                                                                             | Go Component not found |
| P27352 | Gastric intrinsic factor precursor (Intrinsic factor) (IF) (INF).                                                                                                                 | Go Component not found |
| Q8N7A1 | Kelch domain-containing protein 1.                                                                                                                                                | Go Component not found |
| Q13449 | Limbic system-associated membrane protein precursor (LSAMP).                                                                                                                      | Go Component not found |
| Q14149 | [MORC family CW-type zinc finger protein 3 (Zinc finger CW-type coiled-, coil domain protein 3).]                                                                                 | Go Component not found |
| Q8NC67 | [Neuropilin and tolloid-like protein 2 precursor (Brain-specific, transmembrane protein containing 2 CUB and 1 LDL-receptor class A, domains protein 2).]                         | Go Component not found |
| P05120 | [Plasminogen activator inhibitor 2 precursor (PAI-2) (Placental, plasminogen activator inhibitor) (Monocyte Arg-serpin) (Urokinase, inhibitor).]                                  | Go Component not found |
| Q9Y5G9 | Protocadherin gamma A4 precursor (PCDH-gamma-A4).                                                                                                                                 | Go Component not found |
| Q15032 | R3H domain-containing protein 1.                                                                                                                                                  | Go Component not found |

|        |                                                                                                                                                                                                                                                                                                                                     |                        |
|--------|-------------------------------------------------------------------------------------------------------------------------------------------------------------------------------------------------------------------------------------------------------------------------------------------------------------------------------------|------------------------|
| Q96EP0 | [RING finger protein 31 (Zinc in-between-RING-finger ubiquitin-, associated domain protein).]                                                                                                                                                                                                                                       | Go Component not found |
| Q9NY91 | [Low affinity sodium-glucose cotransporter (Sodium/glucose, cotransporter 3) (Na+)/glucose cotransporter 3) (Solute carrier, family 5 member 4).]                                                                                                                                                                                   | Go Component not found |
| Q8WXD2 | Secretogranin-3 precursor (Secretogranin III) (SgIII).                                                                                                                                                                                                                                                                              | Go Component not found |
| O43166 | [Signal-induced proliferation-associated 1-like protein 1 (High-risk, human papilloma viruses E6 oncoproteins targeted protein 1) (E6-, targeted protein 1).]                                                                                                                                                                       | Go Component not found |
| O94991 | [SLIT and NTRK-like protein 5 precursor (Leucine-rich repeat-containing, protein 11).]                                                                                                                                                                                                                                              | Go Component not found |
| Q96BD0 | [Solute carrier organic anion transporter family member 4A1 (Solute, carrier family 21 member 12) (Sodium-independent organic anion, transporter E) (Organic anion-transporting polypeptide E) (OATP-E), (Colon organic anion transporter) (Organic anion transporter, polypeptide-related protein 1) (OATP-RP1) (OATPRP1) (POAT).] | Go Component not found |
| Q8TDD2 | Transcription factor Sp7 (Zinc finger protein osterix).                                                                                                                                                                                                                                                                             | Go Component not found |
| O00186 | [Syntaxin-binding protein 3 (Unc-18 homolog 3) (Unc-18C) (Unc-18-3), (Platelet Sec1 protein) (PSP).]                                                                                                                                                                                                                                | Go Component not found |
| Q96G75 | RMD5 homolog B.                                                                                                                                                                                                                                                                                                                     | Go Component not found |
| Q9NWZ5 | Uridine/cytidine kinase-like 1 (EC 2.7.1.48).                                                                                                                                                                                                                                                                                       | Go Component not found |
| Q8NB66 | Protein unc-13 homolog C (Munc13-3).                                                                                                                                                                                                                                                                                                | Go Component not found |
| Q9UK10 | Zinc finger protein 225.                                                                                                                                                                                                                                                                                                            | Go Component not found |
| Q9BY12 | [S phase cyclin A-associated protein in the ER (Zinc finger protein, 291).]                                                                                                                                                                                                                                                         | Go Component not found |
| P60852 | [Zona pellucida sperm-binding protein 1 precursor (Zona pellucida, glycoprotein 1) (Zp-1) [Contains: Processed zona pellucida sperm-, binding protein 1].]                                                                                                                                                                          | Go Component not found |
| O75373 | Zinc finger protein (Fragment).                                                                                                                                                                                                                                                                                                     | Go Component not found |
| Q5CZ94 | Putative uncharacterized protein DKFZp781M0386.                                                                                                                                                                                                                                                                                     | Go Component not found |
| Q5EBL2 | Zinc finger protein 628.                                                                                                                                                                                                                                                                                                            | Go Component not found |
| Q5JSF6 | Novel protein (Fragment).                                                                                                                                                                                                                                                                                                           | Go Component not found |
| Q5JY77 | G-protein coupled receptor-associated sorting protein 1 (GASP-1).                                                                                                                                                                                                                                                                   | Go Component not found |
| Q495T6 | [Membrane metallo-endopeptidase-like 1 (EC 3.4.24.11) (Membrane, metallo-endopeptidase-like 2) (Nepriysin-2) (Nepriysin II) (NL2), (NEPII) (NEP2(m)) [Contains: Membrane metallo-endopeptidase-like 1., soluble form (Nepriysin-2 secreted) (NEP2(s))].]                                                                            | Go Component not found |
| Q5T5A4 | Uncharacterized protein C1orf194.                                                                                                                                                                                                                                                                                                   | Go Component not found |
| Q8NC56 | LEM domain-containing protein 2 (hLEM2).                                                                                                                                                                                                                                                                                            | Go Component not found |
| Q5VU18 | [Coiled-coil domain containing 19 (Coiled-coil domain containing 19., isoform CRA_b).]                                                                                                                                                                                                                                              | Go Component not found |
| Q68CN4 | Putative uncharacterized protein DKFZp686E23209.                                                                                                                                                                                                                                                                                    | Go Component not found |
| Q68D85 | Putative uncharacterized protein DKFZp686I21167.                                                                                                                                                                                                                                                                                    | Go Component not found |
| Q6MZV6 | Putative uncharacterized protein DKFZp686L19235.                                                                                                                                                                                                                                                                                    | Go Component not found |
| Q9P2N6 | [Uncharacterized protein KIAA1310 (Serum inhibited-related protein), (Testis development protein PRTD).]                                                                                                                                                                                                                            | Go Component not found |
| Q6UWL2 | Sushi domain-containing protein 1 precursor.                                                                                                                                                                                                                                                                                        | Go Component not found |
| Q6UXR4 | Serpin A13 precursor.                                                                                                                                                                                                                                                                                                               | Go Component not found |
| Q6ZN93 | CDNA FLJ16316 fis, clone SPLEN2033490.                                                                                                                                                                                                                                                                                              | Go Component not found |
| Q6ZRZ6 | CDNA FLJ45951 fis, clone PLACE7008766.                                                                                                                                                                                                                                                                                              | Go Component not found |
| Q7Z2X4 | [PTB-containing, cubilin and LRP1-interacting protein (P-CLI1), (Phosphotyrosine interaction domain-containing protein 1) (Protein, NYGGF4).]                                                                                                                                                                                       | Go Component not found |
| Q70CQ4 | [Ubiquitin carboxyl-terminal hydrolase 31 (EC 3.1.2.15) (Ubiquitin, thioesterase 31) (Ubiquitin-specific-processing protease 31), (Deubiquitinating enzyme 31).]                                                                                                                                                                    | Go Component not found |
| O95622 | [Adenylate cyclase type 5 (EC 4.6.1.1) (Adenylate cyclase type V) (ATP, pyrophosphate-lyase 5) (Adenylyl cyclase 5).]                                                                                                                                                                                                               | Go Component not found |

|        |                                                                                                                                                                 |                        |
|--------|-----------------------------------------------------------------------------------------------------------------------------------------------------------------|------------------------|
| Q7Z6J2 | [General receptor for phosphoinositides 1-associated scaffold protein, (GRP1-associated scaffold protein).]                                                     | Go Component not found |
| Q86X02 | [Cerebellar degeneration-related protein 2-like (Paraneoplastic 62 kDa, antigen).]                                                                              | Go Component not found |
| Q8IWG1 | WD repeat-containing protein 63 (Testis development protein NYD-SP29).                                                                                          | Go Component not found |
| Q8IZ40 | REST corepressor 2.                                                                                                                                             | Go Component not found |
| Q8N2E2 | [CDNA PSEC0224 fis, clone HEMBA1005703, weakly similar to UROMODULIN, (HCG1744959).]                                                                            | Go Component not found |
| Q9C0J1 | [UDP-GlcNAc:betaGal beta-1,3-N-acetylglucosaminyltransferase 4, (EC 2.4.1.-) (Beta3Gn-T4) (BGnT-4) (Beta-1,3-N-, acetylglucosaminyltransferase-4).]             | Go Component not found |
| Q8N7T0 | [CDNA FLJ40392 fis, clone TESTI2036913 (HCG1820408, isoform CRA_a), (DPY19L2P2 protein).]                                                                       | Go Component not found |
| Q8N9J9 | CDNA FLJ37013 fis, clone BRACE2010171 (Hypothetical LOC440337).                                                                                                 | Go Component not found |
| Q96QD5 | DEP domain-containing protein 7 (Protein TR2/D15).                                                                                                              | Go Component not found |
| Q96DN5 | WD repeat-containing protein 67.                                                                                                                                | Go Component not found |
| Q8WUN7 | [Ubiquitin domain-containing protein 2 (Dendritic cell-derived, ubiquitin-like protein) (DC-UbP) (Ubiquitin-like protein SB72).]                                | Go Component not found |
| Q8WZ28 | [Putative uncharacterized protein (Putative uncharacterized protein, MGC3123).]                                                                                 | Go Component not found |
| Q96BZ3 | HAGHL protein (Hydroxyacylglutathione hydrolase-like, isoform CRA_h).                                                                                           | Go Component not found |
| Q96ES7 | Coiled-coil domain-containing protein 101.                                                                                                                      | Go Component not found |
| Q96HQ4 | DUSP3 protein.                                                                                                                                                  | Go Component not found |
| Q96M85 | Putative uncharacterized protein FLJ32756.                                                                                                                      | Go Component not found |
| Q99993 | WUGSC:H_2G3A.1 protein.                                                                                                                                         | Go Component not found |
| Q9BR77 | Coiled-coil domain-containing protein 77.                                                                                                                       | Go Component not found |
| Q9BSH5 | Haloacid dehalogenase-like hydrolase domain-containing protein 3.                                                                                               | Go Component not found |
| Q9BTF7 | Calcium binding and coiled-coil domain 2.                                                                                                                       | Go Component not found |
| Q9H814 | [RNA U small nuclear RNA export adapter protein (Phosphorylated adapter, RNA export protein).]                                                                  | Go Component not found |
| Q5TAA0 | Tetratricopeptide repeat protein 22 (TPR repeat protein 22).                                                                                                    | Go Component not found |
| Q9UBS9 | Protein C1orf9 precursor.                                                                                                                                       | Go Component not found |
| Q9UDW8 | WUGSC:H_DJ0747G18.3 protein (VGF nerve growth factor inducible).                                                                                                | Go Component not found |
| Q9ULH9 | KIAA1241 protein (Fragment).                                                                                                                                    | Go Component not found |
| Q6MZW2 | Follistatin-related protein 4 precursor (Follistatin-like 4).                                                                                                   | Go Component not found |
| Q6ZRS2 | [Helicase SRCAP (EC 3.6.1.-) (Snf2-related CBP activator) (Domino, homolog 2).]                                                                                 | Go Component not found |
| P05129 | Protein kinase C gamma type (EC 2.7.11.13) (PKC-gamma).                                                                                                         | Go Component not found |
| Q5VVK9 | [Membrane associated guanylate kinase, WW and PDZ domain containing 3, (Membrane associated guanylate kinase, WW and PDZ domain containing 3,, isoform CRA_b).] | Go Component not found |
| Q96MA6 | Putative adenylate kinase-like protein C9orf98 (EC 2.7.4.3).                                                                                                    | Go Component not found |
| Q9UKA4 | [A-kinase anchor protein 11 (Protein kinase A-anchoring protein 11), (PRKA11) (A kinase anchor protein 220 kDa) (AKAP 220) (hAKAP220).]                         | Go Component not found |
| P52824 | [Diacylglycerol kinase theta (EC 2.7.1.107) (Diglyceride kinase theta), (DGK-theta) (DAG kinase theta).]                                                        | Go Component not found |
| Q9UDY2 | [Tight junction protein ZO-2 (Zonula occludens protein 2) (Zona, occludens protein 2) (Tight junction protein 2).]                                              | Go Component not found |
| Q5JZ02 | TP53 regulating kinase.                                                                                                                                         | Go Component not found |
| Q13315 | [Serine-protein kinase ATM (EC 2.7.11.1) (Ataxia telangiectasia, mutated) (A-T, mutated).]                                                                      | Go Component not found |
| P35558 | [Phosphoenolpyruvate carboxykinase, cytosolic [GTP] (EC 4.1.1.32), (Phosphoenolpyruvate carboxylase) (PEPCK-C).]                                                | Go Component not found |
| P12931 | [Proto-oncogene tyrosine-protein kinase Src (EC 2.7.10.2) (p60-Src) (c-, Src) (pp60c-src).]                                                                     | Go Component not found |
| Q53HR2 | Acyl-Coenzyme A dehydrogenase, very long chain variant (Fragment).                                                                                              | Go Component not found |

|        |                                                                                                                                                                                                                |                        |
|--------|----------------------------------------------------------------------------------------------------------------------------------------------------------------------------------------------------------------|------------------------|
| Q68DD2 | [Cytosolic phospholipase A2 zeta (EC 3.1.1.4) (cPLA2-zeta), (Phospholipase A2 group IVF).]                                                                                                                     | Go Component not found |
| P16885 | [1-phosphatidylinositol-4,5-bisphosphate phosphodiesterase gamma-2, (EC 3.1.4.11) (Phosphoinositide phospholipase C) (PLC-gamma-2), (Phospholipase C-gamma-2) (PLC-IV).]                                       | Go Component not found |
| Q93088 | Betaine-homocysteine S-methyltransferase 1 (EC 2.1.1.5).                                                                                                                                                       | Go Component not found |
| Q96T66 | [Nicotinamide mononucleotide adenylyltransferase 3 (EC 2.7.7.1) (NMN, adenylyltransferase 3).]                                                                                                                 | Go Component not found |
| Q5T013 | [Putative hydroxypyruvate isomerase (EC 5.3.1.22) (Endothelial cell, apoptosis protein E-CE1).]                                                                                                                | Go Component not found |
| Q5TD12 | [Serine palmitoyltransferase, long chain base subunit 2-like, (Aminotransferase 2) (Fragment).]                                                                                                                | Go Component not found |
| Q8N8Q3 | [CDNA FLJ39025 fis, clone NT2RP7004559, weakly similar to ENDONUCLEASE, C1F12.06C (EC 3.1.-.-) (Putative uncharacterized protein FLJ35220).]                                                                   | Go Component not found |
| Q9Y2C4 | Endonuclease G-like 1 (EC 3.1.30.-) (Endo G-like).                                                                                                                                                             | Go Component not found |
| O94788 | [Retinal dehydrogenase 2 (EC 1.2.1.36) (RaldH2) (RALDH 2) (RALDH(II)), (Retinaldehyde-specific dehydrogenase type 2) (Aldehyde dehydrogenase, family 1 member A2).]                                            | Go Component not found |
| P55073 | [Type III iodothyronine deiodinase (EC 1.97.1.11) (Type-III 5'-, deiodinase) (DIOIII) (Type 3 DI) (5DIII).]                                                                                                    | Go Component not found |
| Q504Q3 | [PAB-dependent poly(A)-specific ribonuclease subunit 2 (EC 3.1.13.4), (hPan2) (Inactive ubiquitin carboxyl-terminal hydrolase 52).]                                                                            | Go Component not found |
| Q58A53 | [UDP-N-acetyl-alpha-D-galactosamine:polypeptide N-, acetylgalactosaminyltransferase 16.]                                                                                                                       | Go Component not found |
| Q6NXE8 | Protein-tyrosine phosphatase domain-containing protein 1.                                                                                                                                                      | Go Component not found |
| Q8IVL5 | [Prolyl 3-hydroxylase 2 precursor (EC 1.14.11.7) (Leprecan-like protein, 1) (Myxoid liposarcoma-associated protein 4).]                                                                                        | Go Component not found |
| Q9C0C9 | [Ubiquitin-conjugating enzyme E2 O (EC 6.3.2.19) (Ubiquitin-protein, ligase O) (Ubiquitin carrier protein O) (Ubiquitin-conjugating enzyme, E2 of 230 kDa) (E2-230K).]                                         | Go Component not found |
| P22466 | [Galanin precursor [Contains: Galanin; Galanin message-associated, peptide (GMAP)].]                                                                                                                           | Go Component not found |
| O43451 | [Maltase-glucoamylase, intestinal [Includes: Maltase (EC 3.2.1.20), (Alpha-glucohydrolase); Glucoamylase (EC 3.2.1.3) (Glucan 1,4-alpha-, glucohydrolase)].]                                                   | Go Component not found |
| P05060 | [Secretogranin-1 precursor (Secretogranin I) (Sgl) (Chromogranin-B), (CgB) [Contains: GAWK peptide; CCB peptide].]                                                                                             | Go Component not found |
| Q9UBU7 | Protein DBF4 homolog (Activator of S phase Kinase).                                                                                                                                                            | Go Component not found |
| Q14449 | Growth factor receptor-bound protein 14 (GRB14 adapter protein).                                                                                                                                               | Go Component not found |
| O60256 | [Phosphoribosyl pyrophosphate synthetase-associated protein 2 (PRPP, synthetase-associated protein 2) (41 kDa phosphoribosypyrophosphate, synthetase-associated protein) (PAP41).]                             | Go Component not found |
| Q14524 | [Sodium channel protein type 5 subunit alpha (Sodium channel protein, type V subunit alpha) (Voltage-gated sodium channel subunit alpha, Nav1.5) (Sodium channel protein cardiac muscle subunit alpha) (HH1).] | Go Component not found |
| Q9Y302 | [Protein GPR89 (Putative MAPK-activating protein PM01) (Putative NF-, kappa-B-activating protein 90).]                                                                                                         | Go Component not found |
| Q8NBF2 | NHL repeat-containing protein 2.                                                                                                                                                                               | Go Component not found |
| Q15464 | SH2 domain-containing adapter protein B.                                                                                                                                                                       | Go Component not found |
| P49441 | Inositol polyphosphate 1-phosphatase (EC 3.1.3.57) (IPPase) (IPP).                                                                                                                                             | Go Component not found |
| P01034 | [Cystatin-C precursor (Cystatin-3) (Neuroendocrine basic polypeptide), (Gamma-trace) (Post-gamma-globulin).]                                                                                                   | Go Component not found |
| P52888 | Thimet oligopeptidase (EC 3.4.24.15) (Endopeptidase 24.15) (MP78).                                                                                                                                             | Go Component not found |
| Q7Z5K1 | Leukocyte-derived arginine aminopeptidase long form variant.                                                                                                                                                   | Go Component not found |
| P08185 | [Corticosteroid-binding globulin precursor (CBG) (Transcortin) (Serp, A6).]                                                                                                                                    | Go Component not found |
| Q9Y614 | [Ubiquitin carboxyl-terminal hydrolase 3 (EC 3.1.2.15) (Ubiquitin, thioesterase 3) (Ubiquitin-specific-processing protease 3), (Deubiquitinating enzyme 3).]                                                   | Go Component not found |
| Q7KZ97 | Antithrombin III variant.                                                                                                                                                                                      | Go Component not found |
| Q9UBX7 | [Kallikrein-11 precursor (EC 3.4.21.-) (hK11) (Hippostasin) (Trypsin-, like protease) (Serine protease 20) [Contains: Kallikrein-11 inactive, chain 1; Kallikrein-11 inactive chain 2].]                       | Go Component not found |



|        |                                                                                                                                                                                                                                                                                                                                     |                        |
|--------|-------------------------------------------------------------------------------------------------------------------------------------------------------------------------------------------------------------------------------------------------------------------------------------------------------------------------------------|------------------------|
| P01024 | [Complement C3 precursor [Contains: Complement C3 beta chain;, Complement C3 alpha chain; C3a anaphylatoxin; Complement C3b alpha', chain; Complement C3c alpha' chain fragment 1; Complement C3dg, fragment; Complement C3g fragment; Complement C3d fragment; Complement, C3f fragment; Complement C3c alpha' chain fragment 2].] | Go Component not found |
| Q9UP38 | Frizzled-1 precursor (Fz-1) (hFz1) (FzE1).                                                                                                                                                                                                                                                                                          | Go Component not found |
| Q9NZT2 | [Opioid growth factor receptor (OGFr) (Zeta-type opioid receptor) (7-60, protein).]                                                                                                                                                                                                                                                 | Go Component not found |
| Q12986 | [Transcriptional repressor NF-X1 (EC 6.3.2.-) (Nuclear transcription, factor, X box-binding, 1).]                                                                                                                                                                                                                                   | Go Component not found |
| O95416 | Transcription factor SOX-14.                                                                                                                                                                                                                                                                                                        | Go Component not found |
| O14709 | [Zinc finger protein 197 (ZnF20) (Zinc finger protein with KRAB and, SCAN domains 9).]                                                                                                                                                                                                                                              | Go Component not found |
| Q9H0U4 | Ras-related protein Rab-1B.                                                                                                                                                                                                                                                                                                         | Golgi                  |
| P02751 | [Fibronectin precursor (FN) (Cold-insoluble globulin) (CIG) [Contains:, Ugl-Y1; Ugl-Y2; Ugl-Y3].]                                                                                                                                                                                                                                   | Golgi                  |
| P45844 | [ATP-binding cassette sub-family G member 1 (White protein homolog), (ATP-binding cassette transporter 8).]                                                                                                                                                                                                                         | Golgi                  |
| O00461 | [Golgi integral membrane protein 4 (Golgi phosphoprotein 4) (Golgi, integral membrane protein, cis) (GIMPC) (Golgi-localized, phosphoprotein of 130 kDa) (Golgi phosphoprotein of 130 kDa).]                                                                                                                                        | Golgi                  |
| O14795 | Protein unc-13 homolog B (Munc13-2) (munc13).                                                                                                                                                                                                                                                                                       | Golgi                  |
| Q9H2K0 | [Translation initiation factor IF-3, mitochondrial precursor (IF-3Mt), (IF3(mt)) (IF-3(Mt)) (IF3mt).]                                                                                                                                                                                                                               | Mitochondrial          |
| P54098 | [DNA polymerase subunit gamma-1 (EC 2.7.7.7) (Mitochondrial DNA, polymerase catalytic subunit) (PolG-alpha).]                                                                                                                                                                                                                       | Mitochondrial          |
| Q9Y2Z9 | Ubiquinone biosynthesis monooxygenase COQ6 (EC 1.14.13.-).                                                                                                                                                                                                                                                                          | Mitochondrial          |
| P49748 | [Very long-chain specific acyl-CoA dehydrogenase, mitochondrial, precursor (EC 1.3.99.-) (VLCAD).]                                                                                                                                                                                                                                  | Mitochondrial          |
| P54289 | [Voltage-dependent calcium channel subunit alpha-2/delta-1 precursor, (Voltage-gated calcium channel subunit alpha-2/delta-1) [Contains:, Voltage-dependent calcium channel subunit alpha-2-1; Voltage-dependent, calcium channel subunit delta-1].]                                                                                | Neural                 |
| P07197 | [Neurofilament medium polypeptide (NF-M) (Neurofilament triplet M, protein) (160 kDa neurofilament protein) (Neurofilament 3).]                                                                                                                                                                                                     | Neural                 |
| Q9H6Z4 | Ran-binding protein 3 (RanBP3).                                                                                                                                                                                                                                                                                                     | Nuclear                |
| O95071 | [E3 ubiquitin-protein ligase EDD1 (EC 6.3.2.-) (Hyperplastic discs, protein homolog) (hHYD) (Progesterin-induced protein).]                                                                                                                                                                                                         | Nuclear                |
| P11387 | DNA topoisomerase 1 (EC 5.99.1.2) (DNA topoisomerase I).                                                                                                                                                                                                                                                                            | Nuclear                |
| Q9HCK8 | [Chromodomain-helicase-DNA-binding protein 8 (EC 3.6.1.-) (ATP-, dependent helicase CHD8) (CHD-8) (Helicase with SNF2 domain 1).]                                                                                                                                                                                                   | Nuclear                |
| Q9NX07 | tRNA selenocysteine-associated protein 1 (SECp43).                                                                                                                                                                                                                                                                                  | Nuclear                |
| P80217 | Interferon-induced 35 kDa protein (IFP 35).                                                                                                                                                                                                                                                                                         | Nuclear                |
| Q96T60 | [Bifunctional polynucleotide phosphatase/kinase (Polynucleotide kinase-, 3'-phosphatase) (DNA 5'-kinase/3'-phosphatase) [Includes:, Polynucleotide 3'-phosphatase (EC 3.1.3.32) (2'(3')-polynucleotidase);, Polynucleotide 5'-hydroxyl-kinase (EC 2.7.1.78)].]                                                                      | Nuclear                |
| P22626 | Heterogeneous nuclear ribonucleoproteins A2/B1 (hnRNP A2 / hnRNP B1).                                                                                                                                                                                                                                                               | Nuclear                |
| Q92565 | [Rap guanine nucleotide exchange factor 5 (Guanine nucleotide exchange, factor for Rap1) (Related to Epac) (Repac) (M-Ras-regulated Rap GEF), (MR-GEF).]                                                                                                                                                                            | Nuclear                |
| Q6ZNQ5 | [cDNA FLJ27339 fis, clone TMS09615, highly similar to TFIIH basal, transcription factor complex helicase subunit (EC 3.6.1.-).]                                                                                                                                                                                                     | Nuclear                |
| Q7L590 | Protein MCM10 homolog (HsMCM10).                                                                                                                                                                                                                                                                                                    | Nuclear                |
| Q7Z401 | C-myc promoter-binding protein (DENN domain-containing protein 4A).                                                                                                                                                                                                                                                                 | Nuclear                |
| P09884 | DNA polymerase alpha catalytic subunit (EC 2.7.7.7).                                                                                                                                                                                                                                                                                | Nuclear                |
| Q15424 | [Scaffold attachment factor B1 (SAB-B1) (SAF-B) (HSP27 estrogen, response element-TATA box-binding protein) (HSP27 ERE-TATA-binding, protein).]                                                                                                                                                                                     | Nuclear                |
| P51523 | Zinc finger protein 84 (Zinc finger protein HPF2).                                                                                                                                                                                                                                                                                  | Nuclear                |
| Q9NXJ9 | CDNA FLJ20203 fis, clone COLF1334.                                                                                                                                                                                                                                                                                                  | Nuclear                |
| Q9Y2X3 | Nucleolar protein 5 (Nucleolar protein NOP5) (NOP58).                                                                                                                                                                                                                                                                               | Nuclear                |

|        |                                                                                                                                                                                                                                             |                          |
|--------|---------------------------------------------------------------------------------------------------------------------------------------------------------------------------------------------------------------------------------------------|--------------------------|
| O60287 | Nucleolar pre-ribosomal-associated protein 1 (Protein URB1).                                                                                                                                                                                | Nuclear                  |
| Q92698 | [DNA repair and recombination protein RAD54-like (EC 3.6.1.-) (RAD54, homolog) (hRAD54) (hHR54).]                                                                                                                                           | Nuclear                  |
| Q15772 | [Striated muscle preferentially expressed protein kinase (EC 2.7.11.1), (Aortic preferentially expressed protein 1) (APEG-1).]                                                                                                              | Nuclear                  |
| Q05481 | Zinc finger protein 91 (Zinc finger protein HTF10) (HPF7).                                                                                                                                                                                  | Nuclear                  |
| Q9NYW8 | RB-associated KRAB zinc finger protein (RB-associated KRAB repressor).                                                                                                                                                                      | Nuclear                  |
| Q01954 | Zinc finger protein basonuclin-1.                                                                                                                                                                                                           | Nuclear                  |
| Q9UL36 | Zinc finger protein 236.                                                                                                                                                                                                                    | Nuclear                  |
| Q03924 | [Zinc finger protein 117 (Zinc finger protein HPF9) (Provirus-linked, krueppel) (h-PLK).]                                                                                                                                                   | Nuclear                  |
| P04264 | [Keratin, type II cytoskeletal 1 (Cytokeratin-1) (CK-1) (Keratin-1), (K1) (67 kDa cyokeratin) (Hair alpha protein).]                                                                                                                        | Other Filament or Tubule |
| P53350 | [Serine/threonine-protein kinase PLK1 (EC 2.7.11.21) (Polo-like kinase, 1) (PLK-1) (Serine/threonine-protein kinase 13) (STPK13).]                                                                                                          | Other Filament or Tubule |
| Q08043 | [Alpha-actinin-3 (Alpha-actinin skeletal muscle isoform 3) (F-actin, cross-linking protein).]                                                                                                                                               | Other Filament or Tubule |
| Q9NS87 | [Kinesin-like protein KIF15 (Kinesin-like protein 2) (Serologically, defined breast cancer antigen NY-BR-62).]                                                                                                                              | Other Filament or Tubule |
| Q6P2Q9 | [Pre-mRNA-processing-splicing factor 8 (Splicing factor Prp8) (PRP8, homolog) (220 kDa U5 snRNP-specific protein) (p220).]                                                                                                                  | Other Go Component       |
| Q86VF7 | Nebulin-related-anchoring protein (N-RAP).                                                                                                                                                                                                  | Other Go Component       |
| Q05707 | Collagen alpha-1(XIV) chain precursor (Undulin).                                                                                                                                                                                            | Other Go Component       |
| Q9UI47 | Catenin alpha-3 (Alpha T-catenin) (Cadherin-associated protein).                                                                                                                                                                            | Other Go Component       |
| P12109 | Collagen alpha-1(VI) chain precursor.                                                                                                                                                                                                       | Other Go Component       |
| P16118 | [6-phosphofructo-2-kinase/fructose-2,6-biphosphatase 1 (6PF-2-K/Fru-, 2,6-P2ASE liver isozyme) [Includes: 6-phosphofructo-2-kinase, (EC 2.7.1.105); Fructose-2,6-bisphosphatase (EC 3.1.3.46).]                                             | Other Go Component       |
| Q6ZQW4 | CDNA FLJ46848 fis, clone UTERU3005422.                                                                                                                                                                                                      | Other Go Component       |
| Q6ZP02 | CDNA FLJ26785 fis, clone PRS04357.                                                                                                                                                                                                          | Other Go Component       |
| Q8N8V9 | CDNA FLJ38783 fis, clone LIVER2001191.                                                                                                                                                                                                      | Other Go Component       |
| P01619 | Ig kappa chain V-III region B6.                                                                                                                                                                                                             | Other Go Component       |
| Q6ZP44 | CDNA FLJ26520 fis, clone KDN08032.                                                                                                                                                                                                          | Other Go Component       |
| Q6ZVA4 | [CDNA FLJ42828 fis, clone BRCAN2017442, weakly similar to Homo sapiens, sarcosine dehydrogenase (SARDH).]                                                                                                                                   | Other Go Component       |
| Q5PR22 | COL5A2 protein.                                                                                                                                                                                                                             | Other Go Component       |
| P78363 | [Retinal-specific ATP-binding cassette transporter (ATP-binding, cassette sub-family A member 4) (RIM ABC transporter) (RIM protein), (RmP) (Stargardt disease protein).]                                                                   | Other Membrane           |
| Q9NYZ4 | [Sialic acid-binding Ig-like lectin 8 precursor (Siglec-8), (Sialoadhesin family member 2) (SAF-2) (CD329 antigen) (CDw329).]                                                                                                               | Other Membrane           |
| P51693 | Amyloid-like protein 1 precursor (APLP) (APLP-1) [Contains: C30].                                                                                                                                                                           | Other Membrane           |
| Q7Z443 | Polycystic kidney disease 1-like protein 3.                                                                                                                                                                                                 | Other Membrane           |
| Q07666 | [KH domain-containing, RNA-binding, signal transduction-associated, protein 1 (p21 Ras GTPase-activating protein-associated p62) (GAP-, associated tyrosine phosphoprotein p62) (Src-associated in mitosis 68, kDa protein) (Sam68) (p68).] | Other Membrane           |
| O00533 | [Neural cell adhesion molecule L1-like protein precursor (Close homolog, of L1).]                                                                                                                                                           | Other Membrane           |
| Q5XKQ4 | Alpha-2-glycoprotein 1, zinc-binding.                                                                                                                                                                                                       | Other Membrane           |
| Q6NVV9 | ADAM5P protein.                                                                                                                                                                                                                             | Other Membrane           |
| Q8N7D8 | CDNA FLJ25756 fis, clone TST06241.                                                                                                                                                                                                          | Other Membrane           |
| Q07065 | Cytoskeleton-associated protein 4 (63 kDa membrane protein) (p63).                                                                                                                                                                          | Other Membrane           |
| Q12860 | [Contactin-1 precursor (Neural cell surface protein F3) (Glycoprotein, gp135).]                                                                                                                                                             | Other Membrane           |
| P29475 | [Nitric-oxide synthase, brain (EC 1.14.13.39) (NOS type I) (Neuronal, NOS) (N-NOS) (nNOS) (Constitutive NOS) (NC-NOS) (bNOS).]                                                                                                              | Other Membrane           |

|        |                                                                                                                                                                                                    |                 |
|--------|----------------------------------------------------------------------------------------------------------------------------------------------------------------------------------------------------|-----------------|
| P35498 | [Sodium channel protein type 1 subunit alpha (Sodium channel protein, type I subunit alpha) (Voltage-gated sodium channel subunit alpha, Nav1.1) (Sodium channel protein, brain I subunit alpha).] | Other Membrane  |
| Q6ZMB0 | [UDP-GlcNAc:betaGal beta-1,3-N-acetylglucosaminyltransferase 6, (EC 2.4.1.-) (Beta3Gn-T6) (BGnT-6) (Beta-1,3-N-, acetylglucosaminyltransferase-6) (Core 3 synthase).]                              | Other Membrane  |
| O75976 | [Carboxypeptidase D precursor (EC 3.4.17.22) (Metalloprotease, D) (gp180).]                                                                                                                        | Other Membrane  |
| Q9Y3Q0 | [N-acetylated-alpha-linked acidic dipeptidase 2 (EC 3.4.17.21) (N-, acetylated-alpha-linked acidic dipeptidase II) (NAALADase II).]                                                                | Other Membrane  |
| Q15391 | [P2Y purinoceptor 14 (P2Y14) (UDP-glucose receptor) (G-protein coupled, receptor 105).]                                                                                                            | Other Membrane  |
| P98155 | [Very low-density lipoprotein receptor precursor (VLDL receptor) (VLDL-, R).]                                                                                                                      | Other Membrane  |
| Q9BXR5 | Toll-like receptor 10 precursor (CD290 antigen).                                                                                                                                                   | Other Membrane  |
| Q6IEU2 | Olfactory receptor OR14-38.                                                                                                                                                                        | Other Membrane  |
| P16144 | Integrin beta-4 precursor (GP150) (CD104 antigen).                                                                                                                                                 | Plasma Membrane |
| Q12918 | [Killer cell lectin-like receptor subfamily B member 1 (Natural killer, cell surface protein P1A) (HNKR-P1a) (NKR-P1A) (C-type lectin domain, family 5 member B) (CD161 antigen).]                 | Plasma Membrane |
| Q9Y2J2 | [Band 4.1-like protein 3 (4.1B) (Differentially expressed in, adenocarcinoma of the lung protein 1) (DAL-1).]                                                                                      | Plasma Membrane |
| P11362 | [Basic fibroblast growth factor receptor 1 precursor (EC 2.7.10.1), (FGFR-1) (bFGF-R) (Fms-like tyrosine kinase 2) (c-fgr) (CD331, antigen).]                                                      | Plasma Membrane |
| Q92823 | [Neuronal cell adhesion molecule precursor (Nr-CAM) (NgCAM-related cell, adhesion molecule) (Ng-CAM-related) (hBravo).]                                                                            | Plasma Membrane |
| Q8WTV0 | [Scavenger receptor class B member 1 (SRB1) (SR-BI) (CD36 antigen-like, 1) (CD36 and LIMPII analogous 1) (CLA-1) (Collagen type I receptor,, thrombospondin receptor-like 1).]                     | Plasma Membrane |
| O95456 | [Down syndrome critical region protein 2 (Leucine-rich protein C21-, LRP).]                                                                                                                        | Plasma Membrane |
| Q92859 | Neogenin precursor.                                                                                                                                                                                | Plasma Membrane |
| Q9Y513 | Protocadherin alpha 1 precursor (PCDH-alpha1).                                                                                                                                                     | Plasma Membrane |
| O75323 | Protein NipSnap2 (Glioblastoma amplified sequence).                                                                                                                                                | Plasma Membrane |
| O60243 | Heparan-sulfate 6-O-sulfotransferase 1 (EC 2.8.2.-) (HS6ST-1).                                                                                                                                     | Plasma Membrane |
| O95151 | Calcium activated chloride channel family member 1.                                                                                                                                                | Plasma Membrane |
| Q8NER1 | [Transient receptor potential cation channel subfamily V member 1, (TrpV1) (osm-9-like TRP channel 1) (OTRPC1) (Vanilloid receptor 1), (Capsaicin receptor).]                                      | Plasma Membrane |
| Q13822 | [Ectonucleotide pyrophosphatase/phosphodiesterase family member 2, precursor (EC 3.1.4.39) (E-NPP 2) (Extracellular lysophospholipase D), (LysoPLD) (Autotaxin).]                                  | Plasma Membrane |
| P21860 | [Receptor tyrosine-kinase erbB-3 precursor (EC 2.7.10.1) (c-, erbB3) (Tyrosine kinase-type cell surface receptor HER3).]                                                                           | Plasma Membrane |
| P30968 | Gonadotropin-releasing hormone receptor (GnRH receptor) (GnRH-R).                                                                                                                                  | Plasma Membrane |
| P24046 | [Gamma-aminobutyric acid receptor subunit rho-1 precursor (GABA(A), receptor subunit rho-1).]                                                                                                      | Plasma Membrane |
| P29320 | [Ephrin type-A receptor 3 precursor (EC 2.7.10.1) (Tyrosine-protein, kinase receptor ETK1) (HEK) (HEK4) (Tyrosine-protein kinase TYRO4).]                                                          | Plasma Membrane |
| P17181 | Interferon-alpha/beta receptor alpha chain precursor (IFN-alpha-REC).                                                                                                                              | Plasma Membrane |
| Q08357 | Solute carrier family 20 member 2 (Gibbon leukemia virus receptor 2).                                                                                                                              | Plasma Membrane |
| Q961Y1 | Kinetochore-associated protein NSL1 homolog.                                                                                                                                                       | Protein Complex |
| P68871 | [Hemoglobin subunit beta (Hemoglobin beta chain) (Beta-globin), [Contains: LVV-hemorphin-7].]                                                                                                      | Protein Complex |
| Q99460 | [26S proteasome non-ATPase regulatory subunit 1 (26S proteasome, regulatory subunit RPN2) (26S proteasome regulatory subunit S1) (26S, proteasome subunit p112).]                                  | Protein Complex |

|        |                                                                                                                                                                                                                                                        |                 |
|--------|--------------------------------------------------------------------------------------------------------------------------------------------------------------------------------------------------------------------------------------------------------|-----------------|
| Q53F97 | Alpha 2 globin variant (Fragment).                                                                                                                                                                                                                     | Protein Complex |
| P61289 | [Proteasome activator complex subunit 3 (Proteasome activator 28, subunit gamma) (PA28gamma) (PA28g) (Activator of multicatalytic, protease subunit 3) (11S regulator complex subunit gamma) (REG-gamma), (Ki nuclear autoantigen).]                   | Protein Complex |
| P02675 | Fibrinogen beta chain precursor [Contains: Fibrinopeptide B].                                                                                                                                                                                          | Protein Complex |
| P78552 | [Interleukin-13 receptor alpha-1 chain precursor (IL-13R-alpha-1) (IL-, 13RA-1) (Cancer/testis antigen 19) (CT19) (CD213a1 antigen).]                                                                                                                  | Protein Complex |
| Q96DR0 | [CDNA FLJ30536 fis, clone BRAWH2001166, weakly similar to BETA-, GALACTOSIDASE (EC 3.2.1.23).]                                                                                                                                                         | Protein Complex |
| Q96PK6 | [RNA-binding protein 14 (RNA-binding motif protein 14) (RRM-containing, coactivator activator/modulator) (Synaptotagmin-interacting protein), (SYT-interacting protein).]                                                                              | Protein Complex |
| P29374 | [AT-rich interactive domain-containing protein 4A (ARID domain-, containing protein 4A) (Retinoblastoma-binding protein 1) (RBBP-1).]                                                                                                                  | Transcription   |
| Q9GZX5 | [Zinc finger protein 350 (Zinc finger protein ZBRK1) (Zinc finger and, BRCA1-interacting protein with a KRAB domain 1) (KRAB zinc finger, protein ZFQR).]                                                                                              | Transcription   |
| O00268 | [Transcription initiation factor TFIID subunit 4 (TBP-associated factor, 4) (Transcription initiation factor TFIID 135 kDa subunit), (TAF(II)135) (TAFII-135) (TAFII135) (TAFII-130) (TAFII130) (RNA, polymerase II TBP-associated factor subunit C).] | Transcription   |
| Q02410 | [Amyloid beta A4 precursor protein-binding family A member 1 (Neuron-, specific X11 protein) (Neuronal Munc18-1-interacting protein 1) (Mint-, 1) (Adapter protein X11alpha).]                                                                         | Vesicle         |
| P06133 | [UDP-glucuronosyltransferase 2B4 precursor (EC 2.4.1.17) (UDPGT), (Hyodeoxycholic acid) (HLUG25) (UDPGTh-1).]                                                                                                                                          | Vesicle         |
| O43601 | Putative uncharacterized protein (Fragment).                                                                                                                                                                                                           | Vesicle         |
| P02787 | [Serotransferrin precursor (Transferrin) (Siderophilin) (Beta-1-metal-, binding globulin).]                                                                                                                                                            | Vesicle         |
| Q9BY49 | [Peroxisomal trans-2-enoyl-CoA reductase (EC 1.3.1.38) (TERP) (HPDHase), (pVI-ARL) (2,4-dienoyl-CoA reductase-related protein) (DCR-RP).]                                                                                                              | Vesicle         |
| Q9UJM8 | Hydroxyacid oxidase 1 (EC 1.1.3.15) (HAOX1) (Glycolate oxidase) (GOX).                                                                                                                                                                                 | Vesicle         |
| Q8WZA1 | [Protein O-linked-mannose beta-1,2-N-acetylglucosaminyltransferase 1, (EC 2.4.1.-) (POMGnT1) (UDP-GlcNAc:alpha-D-mannoside beta-1,2-N-, acetylglucosaminyltransferase I.2) (GnT I.2).]                                                                 | Vesicle         |

P3 of Data 4, visit 2

| Uniprot Number | Protein Name                                                                                                                                                                                                                                                                                                                                                           | GO Component CATEGORY  |
|----------------|------------------------------------------------------------------------------------------------------------------------------------------------------------------------------------------------------------------------------------------------------------------------------------------------------------------------------------------------------------------------|------------------------|
| Q9BYG3         | [MKI67 FHA domain-interacting nucleolar phosphoprotein (Nucleolar, protein interacting with the FHA domain of pK1-67) (hNIFK) (Nucleolar, phosphoprotein Nopp34).]                                                                                                                                                                                                     | Chromosomal            |
| P27816         | Microtubule-associated protein 4 (MAP 4).                                                                                                                                                                                                                                                                                                                              | Cytoskeletal           |
| P02649         | Apolipoprotein E precursor (Apo-E).                                                                                                                                                                                                                                                                                                                                    | Cytosolic              |
| P21127         | [PITSLRE serine/threonine-protein kinase CDC2L1 (EC 2.7.11.22), (Galactosyltransferase-associated protein kinase p58/GTA) (Cell, division cycle 2-like protein kinase 1) (CLK-1) (CDK11) (p58 CLK-1).]                                                                                                                                                                 | Cytosolic              |
| Q9Y217         | Myotubularin-related protein 6 (EC 3.1.3.-).                                                                                                                                                                                                                                                                                                                           | Cytosolic              |
| P18124         | 60S ribosomal protein L7.                                                                                                                                                                                                                                                                                                                                              | Cytosolic              |
| Q9H190         | Syntenin-2 (Syndecan-binding protein 2).                                                                                                                                                                                                                                                                                                                               | Cytosolic              |
| Q5VWL4         | [Phospholipase C, epsilon 1 (Phospholipase C, epsilon 1, isoform, CRA_a).]                                                                                                                                                                                                                                                                                             | Cytosolic              |
| Q86VW2         | RhoA/RAC/CDC42 exchange factor (RAC/CDC42/Rho exchange factor GEFT).                                                                                                                                                                                                                                                                                                   | Cytosolic              |
| Q9H902         | Receptor expression-enhancing protein 1.                                                                                                                                                                                                                                                                                                                               | Cytosolic              |
| Q9NPP4         | [NLR family CARD domain-containing protein 4 (Caspase recruitment, domain-containing protein 12) (Ice protease-activating factor) (Ipad), (CARD, LRR, and NACHT-containing protein) (Clan protein).]                                                                                                                                                                   | Cytosolic              |
| O15379         | Histone deacetylase 3 (HD3) (RPD3-2) (SMAP45).                                                                                                                                                                                                                                                                                                                         | Cytosolic              |
| Q8WXG6         | [MAP kinase-activating death domain protein (Differentially expressed, in normal and neoplastic cells) (Insulinoma glucagonoma clone 20), (Rab3 GDP/GTP exchange factor).]                                                                                                                                                                                             | Cytosolic              |
| P22760         | Arylacetamide deacetylase (EC 3.1.1.-) (AADAC).                                                                                                                                                                                                                                                                                                                        | ER                     |
| P01009         | [Alpha-1-antitrypsin precursor (Alpha-1 protease inhibitor) (Alpha-1-, antiproteinase).]                                                                                                                                                                                                                                                                               | Extracellular          |
| P19827         | [Inter-alpha-trypsin inhibitor heavy chain H1 precursor (IT1 heavy, chain H1) (Inter-alpha-inhibitor heavy chain 1) (Inter-alpha-trypsin, inhibitor complex component III) (Serum-derived hyaluronan-associated, protein) (SHAP).]                                                                                                                                     | Extracellular          |
| Q08380         | [Galectin-3-binding protein precursor (Lectin galactoside-binding, soluble 3-binding protein) (Mac-2-binding protein) (Mac-2 BP) (MAC2BP), (Tumor-associated antigen 90K).]                                                                                                                                                                                            | Extracellular          |
| P20062         | Transcobalamin-2 precursor (Transcobalamin II) (TCII) (TC II).                                                                                                                                                                                                                                                                                                         | Extracellular          |
| P01023         | Alpha-2-macroglobulin precursor (Alpha-2-M).                                                                                                                                                                                                                                                                                                                           | Extracellular          |
| P10909         | [Clusterin precursor (Complement-associated protein SP-40,40), (Complement cytolysis inhibitor) (CLI) (NA1/NA2) (Apolipoprotein J), (Apo-J) (Testosterone-repressed prostate message 2) (TRPM-2), [Contains: Clusterin beta chain (ApoJalpha) (Complement cytolysis, inhibitor a chain); Clusterin alpha chain (ApoJbeta) (Complement, cytolysis inhibitor b chain)].] | Extracellular          |
| P02768         | Serum albumin precursor.                                                                                                                                                                                                                                                                                                                                               | Extracellular          |
| P41222         | [Prostaglandin-H2 D-isomerase precursor (EC 5.3.99.2) (Lipocalin-type, prostaglandin-D synthase) (Glutathione-independent PGD synthetase), (Prostaglandin-D2 synthase) (PGD2 synthase) (PGDS2) (PGDS) (Beta-trace, protein) (Cerebrin-28).]                                                                                                                            | Extracellular          |
| Q8IUK7         | ALB protein.                                                                                                                                                                                                                                                                                                                                                           | Extracellular          |
| Q9Y4X0         | AMME syndrome candidate gene 1 protein.                                                                                                                                                                                                                                                                                                                                | Go Component not found |
| Q5SR76         | Uncharacterized protein C10orf93.                                                                                                                                                                                                                                                                                                                                      | Go Component not found |
| P01034         | [Cystatin-C precursor (Cystatin-3) (Neuroendocrine basic polypeptide), (Gamma-trace) (Post-gamma-globulin).]                                                                                                                                                                                                                                                           | Go Component not found |
| Q13642         | [Four and a half LIM domains protein 1 (FHL-1) (Skeletal muscle LIM-, protein 1) (SLIM 1) (SLIM).]                                                                                                                                                                                                                                                                     | Go Component not found |
| P15173         | Myogenin (Myogenic factor 4) (Myf-4).                                                                                                                                                                                                                                                                                                                                  | Go Component not found |

|        |                                                                                                                                                                              |                        |
|--------|------------------------------------------------------------------------------------------------------------------------------------------------------------------------------|------------------------|
| Q8NGI7 | Olfactory receptor 10V1.                                                                                                                                                     | Go Component not found |
| Q99447 | [Ethanalamine-phosphate cytidyltransferase (EC 2.7.7.14), (Phosphorylethanalamine transferase) (CTP:phosphoethanolamine, cytidyltransferase).]                               | Go Component not found |
| Q7Z2W7 | [Transient receptor potential cation channel subfamily M member 8, (Transient receptor potential-p8) (Trp-p8) (Long transient receptor, potential channel 6) (LTrpC6).]      | Go Component not found |
| O95498 | [Vascular non-inflammatory molecule 2 precursor (Vanin-2), (Glycosylphosphatidyl inositol-anchored protein GPI-80) (Protein FOAP-, 4).]                                      | Go Component not found |
| Q53FE4 | Uncharacterized protein C4orf17.                                                                                                                                             | Go Component not found |
| Q5GH70 | XK-related protein 9.                                                                                                                                                        | Go Component not found |
| Q5HYI3 | Putative uncharacterized protein DKFZp686N1815.                                                                                                                              | Go Component not found |
| Q5TCW5 | Chromosome 9 open reading frame 127.                                                                                                                                         | Go Component not found |
| Q6N066 | [Putative uncharacterized protein DKFZp686D14128 (Kelch repeat and BTB, (POZ) domain containing 3, isoform CRA_b) (Kelch repeat and BTB (POZ), domain containing 3).]        | Go Component not found |
| Q6ZSP9 | CDNA FLJ45310 fis, clone BRHIP3004774.                                                                                                                                       | Go Component not found |
| Q8N0W7 | [Fragile X mental retardation 1 neighbor protein (Sarcoma antigen NY-, SAR-35) (Cancer/testis antigen 37) (CT37).]                                                           | Go Component not found |
| Q8NAI6 | CDNA FLJ35314 fis, clone PROST2010606.                                                                                                                                       | Go Component not found |
| Q9H3S5 | [GPI mannosyltransferase 1 (EC 2.4.1.-) (GPI mannosyltransferase I), (GPI-MT-I) (Phosphatidylinositol-glycan biosynthesis class M protein), (PIG-M).]                        | Go Component not found |
| Q9NQW1 | [Protein transport protein Sec31B (SEC31-related protein B) (SEC31B-1), (SEC31-like 2).]                                                                                     | Go Component not found |
| Q9UBY2 | Neurochondrin-2 (Neurochondrin, isoform CRA_b).                                                                                                                              | Go Component not found |
| Q9Y602 | [Cysteine sulfinic acid decarboxylase-related protein 1 (Cysteine, sulfinic acid decarboxylase, isoform CRA_c).]                                                             | Go Component not found |
| Q15389 | Angiotensinogen precursor (ANG-1).                                                                                                                                           | Go Component not found |
| Q9Y574 | Ankyrin repeat and SOCS box protein 4 (ASB-4).                                                                                                                               | Go Component not found |
| Q8WVQ1 | [Soluble calcium-activated nucleotidase 1 (EC 3.6.1.6) (SCAN-1), (Apyrase homolog) (Putative NF-kappa-B-activating protein 107), (Putative MAPK-activating protein PM09).]   | Go Component not found |
| Q8NB25 | Uncharacterized protein C6orf60.                                                                                                                                             | Go Component not found |
| O94964 | Uncharacterized protein C20orf117.                                                                                                                                           | Go Component not found |
| O75829 | [Chondromodulin-1 precursor (Chondromodulin-I) (ChM-I) (Leukocyte cell-, derived chemotaxin 1) [Contains: Chondrosurfactant protein (CH-SP)].]                               | Go Component not found |
| P09917 | Arachidonate 5-lipoxygenase (EC 1.13.11.34) (5-lipoxygenase) (5-LO).                                                                                                         | Go Component not found |
| Q13164 | [Mitogen-activated protein kinase 7 (EC 2.7.11.24) (Extracellular, signal-regulated kinase 5) (ERK-5) (ERK4) (BMK1 kinase).]                                                 | Go Component not found |
| P02144 | Myoglobin.                                                                                                                                                                   | Go Component not found |
| Q8TAT5 | Endonuclease VIII-like 3 (Nei-like 3) (DNA glycosylase FPG2).                                                                                                                | Go Component not found |
| Q9BZF1 | [Oxysterol-binding protein-related protein 8 (OSBP-related protein 8), (ORP-8).]                                                                                             | Go Component not found |
| Q92733 | [Proline-rich protein PRCC (Papillary renal cell carcinoma, translocation-associated gene protein).]                                                                         | Go Component not found |
| Q9BVG9 | [Phosphatidylserine synthase 2 (EC 2.7.8.-) (PtdSer synthase 2) (PSS-2), (Serine-exchange enzyme II).]                                                                       | Go Component not found |
| Q9BQ04 | [RNA-binding protein 4B (RNA-binding motif protein 4B) (RNA-binding, protein 30) (RNA-binding motif protein 30).]                                                            | Go Component not found |
| P51692 | Signal transducer and activator of transcription 5B.                                                                                                                         | Go Component not found |
| P59817 | [Suppressor of hairy wing homolog 1 (3'OY11.1) (Zinc finger protein, 280).]                                                                                                  | Go Component not found |
| P98066 | [Tumor necrosis factor-inducible protein TSG-6 precursor (TNF-, stimulated gene 6 protein) (Tumor necrosis factor, alpha-induced, protein 6) (Hyaluronate-binding protein).] | Go Component not found |

|        |                                                                                                                                                                                                              |                        |
|--------|--------------------------------------------------------------------------------------------------------------------------------------------------------------------------------------------------------------|------------------------|
| Q53TQ3 | Putative uncharacterized protein FLJ20309.                                                                                                                                                                   | Go Component not found |
| Q5H966 | Sex comb on midleg-like 1 ( <i>Drosophila</i> ) (Fragment).                                                                                                                                                  | Go Component not found |
| Q9BZQ6 | ER degradation-enhancing alpha-mannosidase-like 3.                                                                                                                                                           | Go Component not found |
| Q5VY27 | Centrosomal protein 55kDa (Fragment).                                                                                                                                                                        | Go Component not found |
| Q8WUA7 | TBC1 domain family member 22A.                                                                                                                                                                               | Go Component not found |
| Q9ULI0 | ATPase family AAA domain-containing protein 2B.                                                                                                                                                              | Go Component not found |
| Q8NAN4 | CDNA FLJ35074 fis, clone PLACE6001118 (HCG1979341, isoform CRA_a).                                                                                                                                           | Go Component not found |
| Q8WWU5 | TCP11b protein.                                                                                                                                                                                              | Go Component not found |
| Q9UBZ4 | [DNA-(apurinic or apyrimidinic site) lyase 2 (EC 4.2.99.18) (Apurinic-, apyrimidinic endonuclease 2) (AP endonuclease 2) (APEX nuclease 2), (APEX nuclease-like 2) (AP endonuclease XTH2).]                  | Go Component not found |
| P35527 | [Keratin, type I cytoskeletal 9 (Cytokeratin-9) (CK-9) (Keratin-9), (K9).]                                                                                                                                   | Go Component not found |
| O00182 | Galectin-9 (HOM-HD-21) (Ecalectin).                                                                                                                                                                          | Go Component not found |
| O95631 | Netrin-1 precursor.                                                                                                                                                                                          | Go Component not found |
| Q9Y6F1 | [Poly [ADP-ribose] polymerase 3 (EC 2.4.2.30) (PARP-3) (NAD(+) ADP-, ribosyltransferase 3) (Poly[ADP-ribose] synthetase 3) (pADPRT-3), (hPARP-3) (IRT1).]                                                    | Go Component not found |
| Q6IQ26 | Rab6-interacting protein 1 (Rab6IP1).                                                                                                                                                                        | Go Component not found |
| Q9UQ26 | [Regulating synaptic membrane exocytosis protein 2 (Rab3-interacting, molecule 2) (RIM 2).]                                                                                                                  | Go Component not found |
| O75529 | [TAF5-like RNA polymerase II p300/CBP-associated factor-associated, factor 65 kDa subunit 5L (PCAF-associated factor 65 beta) (PAF65-, beta).]                                                               | Go Component not found |
| P49638 | Alpha-tocopherol transfer protein (Alpha-TTP).                                                                                                                                                               | Go Component not found |
| Q59FN2 | P21-activated kinase 2 variant (Fragment).                                                                                                                                                                   | Go Component not found |
| Q5HY98 | Zinc finger protein 766.                                                                                                                                                                                     | Go Component not found |
| Q9NSV4 | Protein diaphanous homolog 3 (Diaphanous-related formin-3) (DRF3).                                                                                                                                           | Go Component not found |
| Q8IX12 | [Cell division cycle and apoptosis regulator protein 1 (Cell cycle and, apoptosis regulatory protein 1) (CARP-1) (Death inducer with SAP, domain).]                                                          | Go Component not found |
| Q5VZE5 | Protein MAK10 homolog (Embryonic growth-associated protein homolog).                                                                                                                                         | Go Component not found |
| Q6MZQ6 | Putative uncharacterized protein DKFZp686G11190.                                                                                                                                                             | Go Component not found |
| Q6ZUY1 | CDNA FLJ43215 fis, clone FEBRA2021908.                                                                                                                                                                       | Go Component not found |
| Q8N9I5 | CDNA FLJ37092 fis, clone BRACE2017934.                                                                                                                                                                       | Go Component not found |
| Q96D53 | Uncharacterized aarF domain-containing protein kinase 4 (EC 2.7.11.-).                                                                                                                                       | Go Component not found |
| Q92600 | Protein RCD1 homolog.                                                                                                                                                                                        | Go Component not found |
| Q8IZ40 | REST corepressor 2.                                                                                                                                                                                          | Go Component not found |
| Q9H903 | [CDNA FLJ13105 fis, clone NT2RP3002351, weakly similar to Human NAD-, dependent methylene tetrahydrofolate dehydrogenase cyclohydrolase, (EC 1.5.1.15).]                                                     | Go Component not found |
| Q6NUN0 | [Acyl-coenzyme A synthetase ACSM5, mitochondrial precursor, (EC 6.2.1.2).]                                                                                                                                   | Go Component not found |
| Q9UF92 | Putative uncharacterized protein DKFZp434K098 (Fragment).                                                                                                                                                    | Go Component not found |
| P02751 | [Fibronectin precursor (FN) (Cold-insoluble globulin) (CIG) [Contains:, Ugl-Y1; Ugl-Y2; Ugl-Y3].]                                                                                                            | Golgi                  |
| Q9Y3R5 | Protein dopey-2.                                                                                                                                                                                             | Golgi                  |
| Q6UWV6 | [Ectonucleotide pyrophosphatase/phosphodiesterase family member 7, precursor (EC 3.1.4.12) (E-NPP7) (NPP-7) (Alkaline sphingomyelin, phosphodiesterase) (Intestinal alkaline sphingomyelinase) (Alk-SMase).] | Golgi                  |

|        |                                                                                                                                                                                                                                                              |                          |
|--------|--------------------------------------------------------------------------------------------------------------------------------------------------------------------------------------------------------------------------------------------------------------|--------------------------|
| O14662 | Syntaxin-16 (Syn16).                                                                                                                                                                                                                                         | Golgi                    |
| Q01085 | Nucleolysin TIAR (TIA-1-related protein).                                                                                                                                                                                                                    | Lysosomal                |
| O00411 | [DNA-directed RNA polymerase, mitochondrial precursor (EC 2.7.7.6), (MtrPOL).]                                                                                                                                                                               | Mitochondrial            |
| Q15878 | [Voltage-dependent R-type calcium channel subunit alpha-1E (Voltage-, gated calcium channel subunit alpha Cav2.3) (Calcium channel, L type,, alpha-1 polypeptide, isoform 6) (Brain calcium channel II) (BII).]                                              | Neural                   |
| O15554 | [Intermediate conductance calcium-activated potassium channel protein 4, (SK4) (KCa4) (IK1) (IKCa1) (Putative Gardos channel).]                                                                                                                              | Neural                   |
| Q9NR82 | [Potassium voltage-gated channel subfamily KQT member 5 (Voltage-gated, potassium channel subunit Kv7.5) (Potassium channel subunit alpha, KvLQT5) (KQT-like 5).]                                                                                            | Neural                   |
| Q92698 | [DNA repair and recombination protein RAD54-like (EC 3.6.1.-) (RAD54, homolog) (hRAD54) (hHR54).]                                                                                                                                                            | Nuclear                  |
| Q8WUN3 | Zinc finger protein 252 (Fragment).                                                                                                                                                                                                                          | Nuclear                  |
| Q9P287 | BRCA2 and CDKN1A-interacting protein (Protein TOK-1).                                                                                                                                                                                                        | Nuclear                  |
| O00148 | [ATP-dependent RNA helicase DDX39 (EC 3.6.1.-) (DEAD box protein 39), (Nuclear RNA helicase URH49).]                                                                                                                                                         | Nuclear                  |
| P17032 | Zinc finger protein 37A (Zinc finger protein KOX21).                                                                                                                                                                                                         | Nuclear                  |
| P02533 | [Keratin, type I cytoskeletal 14 (Cytokeratin-14) (CK-14) (Keratin-14), (K14).]                                                                                                                                                                              | Other Filament or Tubule |
| P35908 | [Keratin, type II cytoskeletal 2 epidermal (Cytokeratin-2e) (K2e) (CK, 2e) (keratin-2).]                                                                                                                                                                     | Other Filament or Tubule |
| P04264 | [Keratin, type II cytoskeletal 1 (Cytokeratin-1) (CK-1) (Keratin-1), (K1) (67 kDa cyokeratin) (Hair alpha protein).]                                                                                                                                         | Other Filament or Tubule |
| P08779 | [Keratin, type I cytoskeletal 16 (Cytokeratin-16) (CK-16) (Keratin-16), (K16).]                                                                                                                                                                              | Other Filament or Tubule |
| P04264 | [Keratin, type II cytoskeletal 1 (Cytokeratin-1) (CK-1) (Keratin-1), (K1) (67 kDa cyokeratin) (Hair alpha protein).]                                                                                                                                         | Other Filament or Tubule |
| P13645 | [Keratin, type I cytoskeletal 10 (Cytokeratin-10) (CK-10) (Keratin-10), (K10).]                                                                                                                                                                              | Other Filament or Tubule |
| P02538 | [Keratin, type II cytoskeletal 6A (Cytokeratin-6A) (CK 6A) (K6a, keratin) (Cytokeratin-6D) (CK 6D).]                                                                                                                                                         | Other Filament or Tubule |
| Q8NEV4 | Myosin IIIA (EC 2.7.11.1).                                                                                                                                                                                                                                   | Other Filament or Tubule |
| P01616 | Ig kappa chain V-II region MIL.                                                                                                                                                                                                                              | Other Go Component       |
| Q6LBZ2 | Histone H4 gene (Fragment).                                                                                                                                                                                                                                  | Other Go Component       |
| Q6NWN0 | Putative uncharacterized protein FLJ12684.                                                                                                                                                                                                                   | Other Go Component       |
| Q96LT2 | CDNA FLJ25086 fis, clone CBL08645.                                                                                                                                                                                                                           | Other Go Component       |
| Q9UI62 | PRO0457.                                                                                                                                                                                                                                                     | Other Go Component       |
| Q93033 | [Immunoglobulin superfamily member 2 precursor (Glu-Trp-Ile EWI motif-, containing protein 101) (EWI-101) (Cell surface glycoprotein V7), (CD101 antigen).]                                                                                                  | Other Membrane           |
| Q9UFR6 | Putative uncharacterized protein DKFZp434B0335 (Fragment).                                                                                                                                                                                                   | Other Membrane           |
| O43603 | Galanin receptor type 2 (GAL2-R) (GALR2).                                                                                                                                                                                                                    | Other Membrane           |
| Q9UHN6 | Transmembrane protein 2.                                                                                                                                                                                                                                     | Other Membrane           |
| Q9NS84 | [Carbohydrate sulfotransferase 7 (EC 2.8.2.17) (EC 2.8.2.-), (Chondroitin 6-sulfotransferase 2) (C6ST-2) (N-acetylglucosamine 6-O-, sulfotransferase 1) (GlcNAc6ST-4) (Galactose/N-acetylglucosamine/N-, acetylglucosamine 6-O-sulfotransferase 5) (GST-5).] | Other Membrane           |
| Q6ZMK5 | FLJ00322 protein (Fragment).                                                                                                                                                                                                                                 | Other Membrane           |
| Q14831 | Metabotropic glutamate receptor 7 precursor (mGluR7).                                                                                                                                                                                                        | Plasma Membrane          |
| P49190 | Parathyroid hormone receptor precursor (PTH2 receptor).                                                                                                                                                                                                      | Plasma Membrane          |
| Q9Y493 | Zonadhesin precursor.                                                                                                                                                                                                                                        | Plasma Membrane          |
| P16066 | [Atrial natriuretic peptide receptor A precursor (ANP-A) (ANPRA) (GC-A), (Guanylate cyclase) (EC 4.6.1.2) (NPR-A) (Atrial natriuretic peptide, A-type receptor).]                                                                                            | Plasma Membrane          |
| P20648 | [Potassium-transporting ATPase alpha chain 1 (EC 3.6.3.10) (Proton, pump) (Gastric H(+)/K(+) ATPase subunit alpha).]                                                                                                                                         | Plasma Membrane          |
| Q14953 | [Killer cell immunoglobulin-like receptor 2DS5 precursor (MHC class I, NK cell receptor) (Natural killer-associated transcript 9) (NKAT-9), (CD158g antigen).]                                                                                               | Plasma Membrane          |



|        |                                                                                                                  |                 |
|--------|------------------------------------------------------------------------------------------------------------------|-----------------|
| Q9UHW9 | [Solute carrier family 12 member 6 (Electroneutral potassium-chloride, cotransporter 3) (K-Cl cotransporter 3).] | Plasma Membrane |
| P02671 | Fibrinogen alpha chain precursor [Contains: Fibrinopeptide A].                                                   | Protein Complex |
| Q9NU98 | OTTHUMP00000016594.                                                                                              | Protein Complex |
| P02675 | Fibrinogen beta chain precursor [Contains: Fibrinopeptide B].                                                    | Protein Complex |
| O43752 | Syntaxin-6.                                                                                                      | Vesicle         |
| P02787 | [Serotransferrin precursor (Transferrin) (Siderophilin) (Beta-1-metal-, binding globulin).]                      | Vesicle         |

## S3 of Data 4, visit 2

| Uniprot Number | Protein Name                                                                                                                                                                                                                                       | GO Component CATEGORY |
|----------------|----------------------------------------------------------------------------------------------------------------------------------------------------------------------------------------------------------------------------------------------------|-----------------------|
| O60264         | [SWI/SNF-related matrix-associated actin-dependent regulator of, chromatin subfamily A member 5 (EC 3.6.1.-) (SWI/SNF-related matrix-, associated actin-dependent regulator of chromatin A5) (Sucrose, nonfermenting protein 2 homolog) (hSNF2H).] | Chromosomal           |
| O14777         | [Kinetochore protein Hec1 (HsHec1) (Kinetochore-associated protein 2), (Highly expressed in cancer protein) (Retinoblastoma-associated, protein HEC).]                                                                                             | Chromosomal           |
| P06396         | [Gelsolin precursor (Actin-depolymerizing factor) (ADF) (Brevin), (AGEL).]                                                                                                                                                                         | Cytoskeletal          |
| Q6H8Q1         | [Actin-binding LIM protein 2 (Actin-binding LIM protein family member, 2) (abLIM-2).]                                                                                                                                                              | Cytoskeletal          |
| P58107         | Epiplakin (450 kDa epidermal antigen).                                                                                                                                                                                                             | Cytoskeletal          |
| Q9UBN4         | [Short transient receptor potential channel 4 (TrpC4) (Trp-related, protein 4) (hTrp-4) (hTrp4).]                                                                                                                                                  | Cytoskeletal          |
| O43602         | [Neuronal migration protein doublecortin (Lissencephalin-X) (Lis-X), (Doublin).]                                                                                                                                                                   | Cytoskeletal          |
| Q15813         | Tubulin-specific chaperone E (Tubulin-folding cofactor E).                                                                                                                                                                                         | Cytoskeletal          |
| P19338         | Nucleolin (Protein C23).                                                                                                                                                                                                                           | Cytoskeletal          |
| Q9C0H9         | [p130Cas-associated protein (p140Cap) (SNAP-25-interacting protein), (SNIP).]                                                                                                                                                                      | Cytoskeletal          |
| Q08495         | Dematin (Erythrocyte membrane protein band 4.9).                                                                                                                                                                                                   | Cytoskeletal          |
| Q14244         | [Enscosin (Microtubule-associated protein 7) (Epithelial microtubule-, associated protein of 115 kDa) (E-MAP-115).]                                                                                                                                | Cytoskeletal          |
| O95433         | Activator of 90 kDa heat shock protein ATPase homolog 1 (AHA1) (p38).                                                                                                                                                                              | Cytosolic             |
| Q9Y408         | Putative uncharacterized protein DKFZp566D133 (Fragment).                                                                                                                                                                                          | Cytosolic             |
| P41240         | [Tyrosine-protein kinase CSK (EC 2.7.10.2) (C-SRC kinase) (Protein-, tyrosine kinase CYL).]                                                                                                                                                        | Cytosolic             |
| Q14684         | RRP1-like protein B.                                                                                                                                                                                                                               | Cytosolic             |
| P37198         | Nuclear pore glycoprotein p62 (62 kDa nucleoporin).                                                                                                                                                                                                | Cytosolic             |
| Q8WYL5         | [Protein phosphatase Slingshot homolog 1 (EC 3.1.3.48) (EC 3.1.3.16), (SSH-1L) (hSSH-1L).]                                                                                                                                                         | Cytosolic             |
| P27037         | [Activin receptor type-2A precursor (EC 2.7.11.30) (Activin receptor, type IIA) (ACTR-IIA) (ACTRIIA).]                                                                                                                                             | Cytosolic             |
| P49454         | [Centromere protein F (Kinetochore protein CENP-F) (Mitosin) (AH, antigen).]                                                                                                                                                                       | Cytosolic             |
| Q00597         | Fanconi anemia group C protein (Protein FACC).                                                                                                                                                                                                     | Cytosolic             |
| Q13418         | [Integrin-linked protein kinase (EC 2.7.11.1) (ILK-1) (ILK-2) (59 kDa, serine/threonine-protein kinase) (p59ILK).]                                                                                                                                 | Cytosolic             |
| Q86UZ3         | Zinc finger protein 513 (Putative uncharacterized protein FLJ32203).                                                                                                                                                                               | Cytosolic             |
| Q92876         | [Kallikrein-6 precursor (EC 3.4.21.-) (Protease M) (Neurosin) (Zyme), (SP59) (Serine protease 9) (Serine protease 18).]                                                                                                                            | Cytosolic             |
| Q9UPN3         | [Microtubule-actin cross-linking factor 1, isoforms 1/2/3/5 (Actin, cross-linking family protein 7) (Macrophin-1) (Trabeculin-alpha) (620, kDa actin-binding protein) (ABP620).]                                                                   | Cytosolic             |
| P26639         | [Threonyl-tRNA synthetase, cytoplasmic (EC 6.1.1.3) (Threonine--tRNA, ligase) (ThrRS).]                                                                                                                                                            | Cytosolic             |
| P22105         | Tenascin-X precursor (TN-X) (Hexabrachion-like protein).                                                                                                                                                                                           | Cytosolic             |
| Q16851         | [UTP--glucose-1-phosphate uridylyltransferase (EC 2.7.7.9) (UDP-glucose, pyrophosphorylase) (UDPGP) (UGPase).]                                                                                                                                     | Cytosolic             |
| Q12830         | [Nucleosome-remodeling factor subunit BPTF (Bromodomain and PHD finger-, containing transcription factor) (Fetal Alzheimer antigen) (Fetal Alz-, 50 clone 1 protein).]                                                                             | Cytosolic             |
| P57075         | [Suppressor of T-cell receptor signaling 2 (STS-2) (Cbl-interacting, protein 4) (CLIP4) (T-cell ubiquitin ligand) (TULA).]                                                                                                                         | Cytosolic             |

|        |                                                                                                                                                                                                                                                      |               |
|--------|------------------------------------------------------------------------------------------------------------------------------------------------------------------------------------------------------------------------------------------------------|---------------|
| Q9P2Y5 | UV radiation resistance-associated gene protein (p63).                                                                                                                                                                                               | Cytosolic     |
| P68402 | [Platelet-activating factor acetylhydrolase IB subunit beta, (EC 3.1.1.47) (PAF acetylhydrolase 30 kDa subunit) (PAF-AH 30 kDa, subunit) (PAF-AH subunit beta) (PAFAH subunit beta).]                                                                | Cytosolic     |
| O95164 | [Ubiquitin-like protein 3 precursor (Membrane-anchored ubiquitin-fold, protein) (MUB) (HsMUB) (Protein HCG-1).]                                                                                                                                      | Cytosolic     |
| Q9ULU8 | [Calcium-dependent secretion activator 1 (Calcium-dependent activator, protein for secretion 1) (CAPS-1).]                                                                                                                                           | Cytosolic     |
| Q13217 | [DnaJ homolog subfamily C member 3 (Interferon-induced, double-stranded, RNA-activated protein kinase inhibitor) (Protein kinase inhibitor p58), (Protein kinase inhibitor of 58 kDa).]                                                              | Cytosolic     |
| Q9NQ66 | [1-phosphatidylinositol-4,5-bisphosphate phosphodiesterase beta-1, (EC 3.1.4.11) (Phosphoinositide phospholipase C) (Phospholipase C-, beta-1) (PLC-beta-1) (PLC-I) (PLC-154).]                                                                      | Cytosolic     |
| P48507 | [Glutamate--cysteine ligase regulatory subunit (EC 6.3.2.2) (Gamma-, glutamylcysteine synthetase regulatory subunit) (Gamma-ECS regulatory, subunit) (GCS light chain) (Glutamate--cysteine ligase modifier, subunit).]                              | Cytosolic     |
| O15067 | [Phosphoribosylformylglycinamide synthase (EC 6.3.5.3) (FGAM, synthase) (FGAMS) (Formylglycinamide ribotide amidotransferase), (FGARAT) (Formylglycinamide ribotide synthetase).]                                                                    | Cytosolic     |
| Q99259 | [Glutamate decarboxylase 1 (EC 4.1.1.15) (Glutamate decarboxylase 67, kDa isoform) (GAD-67) (67 kDa glutamic acid decarboxylase).]                                                                                                                   | Cytosolic     |
| Q9UMR2 | [ATP-dependent RNA helicase DDX19B (EC 3.6.1.-) (DEAD box protein 19B), (DEAD box RNA helicase DEAD5).]                                                                                                                                              | Cytosolic     |
| P11413 | Glucose-6-phosphate 1-dehydrogenase (EC 1.1.1.49) (G6PD).                                                                                                                                                                                            | Cytosolic     |
| O14772 | [Fucose-1-phosphate guanylyltransferase (EC 2.7.7.30) (GDP-L-fucose, pyrophosphorylase) (GDP-L-fucose diphosphorylase).]                                                                                                                             | Cytosolic     |
| Q6AZ96 | Src homology 3 domain-containing guanine nucleotide exchange factor.                                                                                                                                                                                 | Cytosolic     |
| Q9NVM4 | Protein arginine N-methyltransferase 7 (EC 2.1.1.-).                                                                                                                                                                                                 | Cytosolic     |
| P02649 | Apolipoprotein E precursor (Apo-E).                                                                                                                                                                                                                  | Cytosolic     |
| Q9UN86 | [Ras GTPase-activating protein-binding protein 2 (G3BP-2) (GAP SH3, domain-binding protein 2).]                                                                                                                                                      | Cytosolic     |
| Q15652 | [Probable JmjC domain-containing histone demethylation protein 2C, (EC 1.14.11.-) (Jumonji domain-containing protein 1C) (Thyroid, receptor-interacting protein 8) (TRIP-8).]                                                                        | Cytosolic     |
| P51003 | [Poly(A) polymerase alpha (EC 2.7.7.19) (PAP) (Polynucleotide, adenylyltransferase alpha).]                                                                                                                                                          | Cytosolic     |
| Q66K31 | TRMU protein.                                                                                                                                                                                                                                        | Cytosolic     |
| Q92766 | [RAS-responsive element-binding protein 1 (RREB-1) (Raf-responsive zinc, finger protein LZ321) (Zinc finger motif-enhancer binding-protein 1), (Zep-1) (Finger protein in nuclear bodies).]                                                          | Cytosolic     |
| Q93063 | [Exostosin-2 (EC 2.4.1.224) (EC 2.4.1.225) (Glucuronosyl-N-, acetylglucosaminyl-proteoglycan/N-acetylglucosaminyl-proteoglycan 4-, alpha-N-acetylglucosaminyltransferase) (Putative tumor suppressor, protein EXT2) (Multiple exostoses protein 2).] | ER            |
| Q86T76 | Putative uncharacterized protein DKFZp451O0317.                                                                                                                                                                                                      | ER            |
| P20774 | Mimecan precursor (Osteoglycin) (Osteoinductive factor) (OIF).                                                                                                                                                                                       | ER            |
| Q8TEQ8 | [GPI ethanolamine phosphate transferase 3 (EC 2.-.-.-), (Phosphatidylinositol-glycan biosynthesis class O protein) (PIG-O).]                                                                                                                         | ER            |
| P11511 | [Cytochrome P450 19A1 (EC 1.14.14.1) (Aromatase) (CYPXIX) (Estrogen, synthetase) (P-450AROM).]                                                                                                                                                       | ER            |
| P02763 | Alpha-1-acid glycoprotein 1 precursor (AGP 1) (Orosomuroid-1) (OMD 1).                                                                                                                                                                               | Extracellular |
| P02647 | [Apolipoprotein A-I precursor (Apo-AI) (ApoA-I) [Contains:, Apolipoprotein A-I(1-242)].]                                                                                                                                                             | Extracellular |
| P01042 | [Kininogen-1 precursor (Alpha-2-thiol proteinase inhibitor) [Contains:, Kininogen-1 heavy chain; Bradykinin (Kallidin I); Lysyl-bradykinin, (Kallidin II); Kininogen-1 light chain; Low molecular weight growth-, promoting factor].]                | Extracellular |
| P35030 | [Trypsin-3 precursor (EC 3.4.21.4) (Trypsin III) (Brain trypsinogen), (Mesotrypsinogen) (Trypsin IV) (Serine protease 3) (Serine protease, 4).]                                                                                                      | Extracellular |

|        |                                                                                                                                                                                                                                                                                                                                                                        |               |
|--------|------------------------------------------------------------------------------------------------------------------------------------------------------------------------------------------------------------------------------------------------------------------------------------------------------------------------------------------------------------------------|---------------|
| P01009 | [Alpha-1-antitrypsin precursor (Alpha-1 protease inhibitor) (Alpha-1-, antiproteinase).]                                                                                                                                                                                                                                                                               | Extracellular |
| Q99435 | [Protein kinase C-binding protein NELL2 precursor (NEL-like protein 2), (Nel-related protein 2).]                                                                                                                                                                                                                                                                      | Extracellular |
| P02774 | [Vitamin D-binding protein precursor (DBP) (Group-specific component), (Gc-globulin) (VDB).]                                                                                                                                                                                                                                                                           | Extracellular |
| P02790 | Hemopexin precursor (Beta-1B-glycoprotein).                                                                                                                                                                                                                                                                                                                            | Extracellular |
| P01620 | Ig kappa chain V-III region SIE.                                                                                                                                                                                                                                                                                                                                       | Extracellular |
| P10451 | [Osteopontin precursor (Bone sialoprotein 1) (Secreted phosphoprotein, 1) (SPP-1) (Urinary stone protein) (Nephropontin) (Uropontin).]                                                                                                                                                                                                                                 | Extracellular |
| P09486 | [SPARC precursor (Secreted protein acidic and rich in cysteine), (Osteonectin) (ON) (Basement-membrane protein 40) (BM-40).]                                                                                                                                                                                                                                           | Extracellular |
| P35443 | Thrombospondin-4 precursor.                                                                                                                                                                                                                                                                                                                                            | Extracellular |
| P04004 | [Vitronectin precursor (Serum-spreading factor) (S-protein) (V75), [Contains: Vitronectin V65 subunit; Vitronectin V10 subunit;, Somatomedin-B].]                                                                                                                                                                                                                      | Extracellular |
| P08603 | Complement factor H precursor (H factor 1).                                                                                                                                                                                                                                                                                                                            | Extracellular |
| P10909 | [Clusterin precursor (Complement-associated protein SP-40,40), (Complement cytolysis inhibitor) (CLI) (NA1/NA2) (Apolipoprotein J), (Apo-J) (Testosterone-repressed prostate message 2) (TRPM-2), [Contains: Clusterin beta chain (ApoJalpha) (Complement cytolysis, inhibitor a chain); Clusterin alpha chain (ApoJbeta) (Complement, cytolysis inhibitor b chain)].] | Extracellular |
| P04196 | [Histidine-rich glycoprotein precursor (Histidine-proline-rich, glycoprotein) (HPRG).]                                                                                                                                                                                                                                                                                 | Extracellular |
| P05452 | [Tetranectin precursor (TN) (C-type lectin domain family 3 member B), (Plasminogen kringle 4-binding protein).]                                                                                                                                                                                                                                                        | Extracellular |
| P02766 | Transthyretin precursor (Prealbumin) (TBPA) (TTR) (ATTR).                                                                                                                                                                                                                                                                                                              | Extracellular |
| P43652 | Afamin precursor (Alpha-albumin) (Alpha-Alb).                                                                                                                                                                                                                                                                                                                          | Extracellular |
| Q9UBP4 | Dickkopf-related protein 3 precursor (Dkk-3) (Dickkopf-3) (hDkk-3).                                                                                                                                                                                                                                                                                                    | Extracellular |
| P55058 | Phospholipid transfer protein precursor (Lipid transfer protein II).                                                                                                                                                                                                                                                                                                   | Extracellular |
| P04217 | Alpha-1B-glycoprotein precursor (Alpha-1-B glycoprotein).                                                                                                                                                                                                                                                                                                              | Extracellular |
| P00738 | [Haptoglobin precursor [Contains: Haptoglobin alpha chain; Haptoglobin, beta chain].]                                                                                                                                                                                                                                                                                  | Extracellular |
| P02765 | [Alpha-2-HS-glycoprotein precursor (Fetuin-A) (Alpha-2-Z-globulin) (Ba-, alpha-2-glycoprotein) [Contains: Alpha-2-HS-glycoprotein chain A;, Alpha-2-HS-glycoprotein chain B].]                                                                                                                                                                                         | Extracellular |
| P41222 | [Prostaglandin-H2 D-isomerase precursor (EC 5.3.99.2) (Lipocalin-type, prostaglandin-D synthase) (Glutathione-independent PGD synthetase), (Prostaglandin-D2 synthase) (PGD2 synthase) (PGDS2) (PGDS) (Beta-trace, protein) (Cerebrin-28).]                                                                                                                            | Extracellular |
| P00450 | Ceruloplasmin precursor (EC 1.16.3.1) (Ferroxidase).                                                                                                                                                                                                                                                                                                                   | Extracellular |
| O00584 | Ribonuclease T2 precursor (EC 3.1.27.-) (Ribonuclease 6).                                                                                                                                                                                                                                                                                                              | Extracellular |
| Q92520 | Protein FAM3C precursor (Protein GS3786).                                                                                                                                                                                                                                                                                                                              | Extracellular |
| P13521 | [Secretogranin-2 precursor (Secretogranin II) (SgII) (Chromogranin-C), [Contains: Secretoneurin (SN)].]                                                                                                                                                                                                                                                                | Extracellular |
| P02768 | Serum albumin precursor.                                                                                                                                                                                                                                                                                                                                               | Extracellular |
| Q8IUK7 | ALB protein.                                                                                                                                                                                                                                                                                                                                                           | Extracellular |
| P01011 | [Alpha-1-antichymotrypsin precursor (ACT) (Cell growth-inhibiting gene, 24/25 protein) [Contains: Alpha-1-antichymotrypsin His-Pro-less].]                                                                                                                                                                                                                             | Extracellular |
| P06727 | Apolipoprotein A-IV precursor (Apo-AIV) (ApoA-IV).                                                                                                                                                                                                                                                                                                                     | Extracellular |
| P07477 | [Trypsin-1 precursor (EC 3.4.21.4) (Trypsin I) (Cationic trypsinogen), (Serine protease 1).]                                                                                                                                                                                                                                                                           | Extracellular |
| P01023 | Alpha-2-macroglobulin precursor (Alpha-2-M).                                                                                                                                                                                                                                                                                                                           | Extracellular |

|        |                                                                                                                                                                                                                                                                                                             |                        |
|--------|-------------------------------------------------------------------------------------------------------------------------------------------------------------------------------------------------------------------------------------------------------------------------------------------------------------|------------------------|
| P05155 | [Plasma protease C1 inhibitor precursor (C1 Inh) (C1Inh) (C1 esterase, inhibitor) (C1-inhibiting factor).]                                                                                                                                                                                                  | Extracellular          |
| Q9UHG2 | [ProSAAS precursor (pro-SAAS) (Proprotein convertase subtilisin/kexin, type 1 inhibitor) (Proprotein convertase 1 inhibitor) [Contains: KEP;, Big SAAS (b-SAAS); Little SAAS (l-SAAS) (N-proSAAS); Big PEN-LEN (b-, PEN-LEN) (SAAS CT(1-49)); PEN; Little LEN (l-LEN); Big LEN (b-LEN), (SAAS CT(25-40))].] | Extracellular          |
| Q5JNX2 | Complement component 4A (Rodgers blood group).                                                                                                                                                                                                                                                              | Extracellular          |
| P36955 | [Pigment epithelium-derived factor precursor (PEDF) (Serpine-F1) (EPC-, 1).]                                                                                                                                                                                                                                | Extracellular          |
| P01019 | [Angiotensinogen precursor (Serpine A8) [Contains: Angiotensin-1, (Angiotensin I) (Ang I); Angiotensin-2 (Angiotensin II) (Ang II);, Angiotensin-3 (Angiotensin III) (Ang III) (Des-Asp[1]-angiotensin, II)].]                                                                                              | Extracellular          |
| P23142 | Fibulin-1 precursor.                                                                                                                                                                                                                                                                                        | Extracellular          |
| Q9NRM1 | Enamelin precursor.                                                                                                                                                                                                                                                                                         | Extracellular          |
| P05090 | Apolipoprotein D precursor (Apo-D) (ApoD).                                                                                                                                                                                                                                                                  | Extracellular          |
| P02652 | [Apolipoprotein A-II precursor (Apo-AII) (ApoA-II) [Contains:, Apolipoprotein A-II(1-76)].]                                                                                                                                                                                                                 | Extracellular          |
| Q9Y272 | [Dexamethasone-induced Ras-related protein 1 precursor (Activator of G-, protein signaling 1).]                                                                                                                                                                                                             | Go Component not found |
| P61769 | [Beta-2-microglobulin precursor [Contains: Beta-2-microglobulin form pl, 5.3].]                                                                                                                                                                                                                             | Go Component not found |
| O14867 | [Transcription regulator protein BACH1 (BTB and CNC homolog 1), (HA2303).]                                                                                                                                                                                                                                  | Go Component not found |
| P01842 | Ig lambda chain C regions.                                                                                                                                                                                                                                                                                  | Go Component not found |
| O15479 | [Melanoma-associated antigen B2 (MAGE-B2 antigen) (DSS-AHC critical, interval MAGE superfamily 6) (DAM6) (MAGE XP-2) (Cancer/testis antigen, 3.2) (CT3.2).]                                                                                                                                                 | Go Component not found |
| P00558 | [Phosphoglycerate kinase 1 (EC 2.7.2.3) (Primer recognition protein 2), (PRP 2) (Cell migration-inducing gene 10 protein).]                                                                                                                                                                                 | Go Component not found |
| P35813 | [Protein phosphatase 1A (EC 3.1.3.16) (Protein phosphatase 2C isoform, alpha) (PP2C-alpha) (IA).]                                                                                                                                                                                                           | Go Component not found |
| P45378 | [Troponin T, fast skeletal muscle (TnTf) (Fast skeletal muscle troponin, T) (fTnT) (Beta TnTF).]                                                                                                                                                                                                            | Go Component not found |
| Q6NZY4 | Zinc finger CCHC domain-containing protein 8.                                                                                                                                                                                                                                                               | Go Component not found |
| Q58FF3 | Heat shock protein 94b.                                                                                                                                                                                                                                                                                     | Go Component not found |
| Q8TDL7 | Spermatogenesis associated factor.                                                                                                                                                                                                                                                                          | Go Component not found |
| Q96RK0 | Protein capicua homolog.                                                                                                                                                                                                                                                                                    | Go Component not found |
| Q13619 | Cullin-4A (CUL-4A).                                                                                                                                                                                                                                                                                         | Go Component not found |
| P42679 | [Megakaryocyte-associated tyrosine-protein kinase (EC 2.7.10.2), (Tyrosine-protein kinase CTK) (Protein kinase HYL) (Hematopoietic, consensus tyrosine-lacking kinase).]                                                                                                                                    | Go Component not found |
| P98066 | [Tumor necrosis factor-inducible protein TSG-6 precursor (TNF-, stimulated gene 6 protein) (Tumor necrosis factor, alpha-induced, protein 6) (Hyaluronate-binding protein).]                                                                                                                                | Go Component not found |
| P52735 | Protein vav-2.                                                                                                                                                                                                                                                                                              | Go Component not found |
| Q8N720 | Zinc finger protein 655 (Vav-interacting Krueppel-like protein).                                                                                                                                                                                                                                            | Go Component not found |
| Q8N1V2 | [WD repeat-containing protein 16 (WD40-repeat protein up-regulated in, HCC).]                                                                                                                                                                                                                               | Go Component not found |
| Q5JUW7 | [Discs, large homolog 3 (Neuroendocrine-dlg, Drosophila) (Discs, large, homolog 3 (Neuroendocrine-dlg, Drosophila), isoform CRA_d).]                                                                                                                                                                        | Go Component not found |
| Q5PRF9 | Sterile alpha motif domain-containing protein 4B.                                                                                                                                                                                                                                                           | Go Component not found |
| Q5VZK9 | Leucine-rich repeat-containing protein 16.                                                                                                                                                                                                                                                                  | Go Component not found |
| Q8N8A2 | Ankyrin repeat domain-containing protein 44.                                                                                                                                                                                                                                                                | Go Component not found |

|        |                                                                                                                                                                                                                                   |                        |
|--------|-----------------------------------------------------------------------------------------------------------------------------------------------------------------------------------------------------------------------------------|------------------------|
| Q9BWU1 | [Cell division cycle 2-like protein kinase 6 (EC 2.7.11.22) (CDC2-, related protein kinase 6) (Death-preventing kinase) (Cyclin-dependent, kinase 11).]                                                                           | Go Component not found |
| P00751 | [Complement factor B precursor (EC 3.4.21.47) (C3/C5 convertase), (Properdin factor B) (Glycine-rich beta glycoprotein) (GBG) (PBF2), [Contains: Complement factor B Ba fragment; Complement factor B Bb, fragment].]             | Go Component not found |
| Q15418 | [Ribosomal protein S6 kinase alpha-1 (EC 2.7.11.1) (S6K-alpha 1) (90, kDa ribosomal protein S6 kinase 1) (p90-RSK 1) (Ribosomal S6 kinase 1), (RSK-1) (pp90RSK1) (p90S6K) (MAP kinase-activated protein kinase 1a), (MAPKAPK1A).] | Go Component not found |
| Q14134 | [Tripartite motif-containing protein 29 (Ataxia-telangiectasia group D-, associated protein).]                                                                                                                                    | Go Component not found |
| Q5JPN5 | LON peptidase N-terminal domain and ring finger 3 (Fragment).                                                                                                                                                                     | Go Component not found |
| Q9HBH9 | [MAP kinase-interacting serine/threonine-protein kinase 2 (EC 2.7.11.1), (MAP kinase signal-integrating kinase 2) (Mnk2).]                                                                                                        | Go Component not found |
| Q6NUP7 | KIAA1622 (KIAA1622, isoform CRA_a).                                                                                                                                                                                               | Go Component not found |
| Q6ZTD5 | [CDNA FLJ44762 fis, clone BRACE3031743, moderately similar to Homo, sapiens bruno-like 4, RNA binding protein.]                                                                                                                   | Go Component not found |
| Q96BE9 | CDK4 protein (Cyclin-dependent kinase 4, isoform CRA_c).                                                                                                                                                                          | Go Component not found |
| Q9Y5L5 | Lens epithelial cell protein LEP503.                                                                                                                                                                                              | Go Component not found |
| O00172 | Line-1 reverse transcriptase (Fragment).                                                                                                                                                                                          | Go Component not found |
| Q5VZL5 | Zinc finger MYM-type protein 4 (Zinc finger protein 262).                                                                                                                                                                         | Go Component not found |
| Q9BXJ4 | [Complement C1q tumor necrosis factor-related protein 3 precursor, (Secretory protein CORS26).]                                                                                                                                   | Go Component not found |
| O60543 | [Cell death activator CIDE-A (Cell death-inducing DFFA-like effector, A).]                                                                                                                                                        | Go Component not found |
| P0C0L4 | [Complement C4-A precursor (Acidic complement C4) [Contains: Complement, C4 beta chain; Complement C4-A alpha chain; C4a anaphylatoxin; C4b-A;, C4d-A; Complement C4 gamma chain].]                                               | Go Component not found |
| Q9NVD3 | SET domain-containing protein 4.                                                                                                                                                                                                  | Go Component not found |
| Q9UII4 | [Probable E3 ubiquitin-protein ligase HERC5 (EC 6.3.2.-) (HECT domain, and RCC1-like domain-containing protein 5) (Cyclin-E-binding protein, 1).]                                                                                 | Go Component not found |
| Q96PQ7 | Kelch-like protein 5.                                                                                                                                                                                                             | Go Component not found |
| O14513 | Nck-associated protein 5 (NAP-5) (Peripheral clock protein).                                                                                                                                                                      | Go Component not found |
| Q7RTW8 | Otoancorin precursor.                                                                                                                                                                                                             | Go Component not found |
| Q9Y365 | [PCTP-like protein (PCTP-L) (STAR-related lipid transfer protein 10), (StARD10) (START domain-containing protein 10) (Serologically defined, colon cancer antigen 28) (Antigen NY-CO-28).]                                        | Go Component not found |
| Q96EP0 | [RING finger protein 31 (Zinc in-between-RING-finger ubiquitin-, associated domain protein).]                                                                                                                                     | Go Component not found |
| Q9NY91 | [Low affinity sodium-glucose cotransporter (Sodium/glucose, cotransporter 3) (Na+)/glucose cotransporter 3) (Solute carrier, family 5 member 4).]                                                                                 | Go Component not found |
| Q13242 | [Splicing factor, arginine/serine-rich 9 (Pre-mRNA-splicing factor, SRp30C).]                                                                                                                                                     | Go Component not found |
| Q9UHH3 | Scm-like with four MBT domains protein 1 (Renal ubiquitous protein 1).                                                                                                                                                            | Go Component not found |
| Q14515 | [SPARC-like protein 1 precursor (High endothelial venule protein), (Hevin) (MAST 9).]                                                                                                                                             | Go Component not found |
| P59817 | [Suppressor of hairy wing homolog 1 (3'OY11.1) (Zinc finger protein, 280).]                                                                                                                                                       | Go Component not found |
| Q9Y6A5 | Transforming acidic coiled-coil-containing protein 3 (ERIC-1).                                                                                                                                                                    | Go Component not found |
| Q8TBP0 | TBC1 domain family member 16.                                                                                                                                                                                                     | Go Component not found |
| Q9UPW8 | Protein unc-13 homolog A (Munc13-1).                                                                                                                                                                                              | Go Component not found |
| O95498 | [Vascular non-inflammatory molecule 2 precursor (Vanin-2), (Glycosylphosphatidyl inositol-anchored protein GPI-80) (Protein FOAP-, 4).]                                                                                           | Go Component not found |

|        |                                                                                                                                                                  |                        |
|--------|------------------------------------------------------------------------------------------------------------------------------------------------------------------|------------------------|
| P62699 | Protein yippee-like 5.                                                                                                                                           | Go Component not found |
| Q9NYT6 | Zinc finger protein 226.                                                                                                                                         | Go Component not found |
| Q8N8Z8 | Zinc finger protein 441.                                                                                                                                         | Go Component not found |
| P60852 | [Zona pellucida sperm-binding protein 1 precursor (Zona pellucida, glycoprotein 1) (Zp-1) [Contains: Processed zona pellucida sperm-, binding protein 1].]       | Go Component not found |
| O15014 | Zinc finger protein 609.                                                                                                                                         | Go Component not found |
| Q7Z398 | Zinc finger protein 550.                                                                                                                                         | Go Component not found |
| Q9BQC3 | [Diphthamide biosynthesis protein 2 (DPH2 homolog) (HsDph2), (Diphthamide biosynthesis protein 2 homolog-like 2) (DPH2-like 2).]                                 | Go Component not found |
| O75199 | Putative uncharacterized protein A-761H5.4.                                                                                                                      | Go Component not found |
| Q53EV4 | Leucine-rich repeat-containing protein 23 (Leucine-rich protein B7).                                                                                             | Go Component not found |
| Q5HYI6 | Putative uncharacterized protein DKFZp313O2236 (Fragment).                                                                                                       | Go Component not found |
| Q8NEY1 | [Neuron navigator 1 (Steerin-1) (Pore membrane and/or filament-, interacting-like protein 3) (Unc-53 homolog 1) (unc53H1).]                                      | Go Component not found |
| Q5T447 | [Probable E3 ubiquitin-protein ligase HECTD3 (HECT domain-containing, protein 3).]                                                                               | Go Component not found |
| Q5T7N3 | Ankyrin repeat domain-containing protein 38.                                                                                                                     | Go Component not found |
| Q5TGZ2 | [Neuroblastoma, suppression of tumorigenicity 1 (Neuroblastoma,, suppression of tumorigenicity 1, isoform CRA_a).]                                               | Go Component not found |
| Q5VWN6 | Uncharacterized protein C10orf18.                                                                                                                                | Go Component not found |
| Q68CN4 | Putative uncharacterized protein DKFZp686E23209.                                                                                                                 | Go Component not found |
| Q9P2P5 | [E3 ubiquitin-protein ligase HECW2 (EC 6.3.2.-) (HECT, C2 and WW, domain-containing protein 2) (NEDD4-like E3 ubiquitin-protein ligase, 2).]                     | Go Component not found |
| Q6IPR3 | tRNA wybutosine-synthesizing protein 3 homolog (EC 2.1.1.-).                                                                                                     | Go Component not found |
| Q6MZV6 | Putative uncharacterized protein DKFZp686L19235.                                                                                                                 | Go Component not found |
| Q6N095 | Putative uncharacterized protein DKFZp686K03196.                                                                                                                 | Go Component not found |
| Q6P5U3 | CMYA5 protein (Fragment).                                                                                                                                        | Go Component not found |
| Q6PIU2 | Arylacetamide deacetylase-like 1 (EC 3.1.1.-).                                                                                                                   | Go Component not found |
| Q6UW49 | [Sperm equatorial segment protein 1 precursor (SP-ESP) (Equatorial, segment protein) (ESP) (Glycosylated 38 kDa sperm protein C-7/8).]                           | Go Component not found |
| Q6ZN84 | Coiled-coil domain-containing protein 81.                                                                                                                        | Go Component not found |
| Q6ZNY1 | CDNA FLJ26894 fis, clone RCT00440.                                                                                                                               | Go Component not found |
| Q6ZRF7 | Zinc finger protein 818.                                                                                                                                         | Go Component not found |
| Q6ZSA8 | CDNA FLJ45684 fis, clone FCBBF3005160.                                                                                                                           | Go Component not found |
| Q6ZTG8 | CDNA FLJ44670 fis, clone BRACE3005903.                                                                                                                           | Go Component not found |
| Q6ZUT9 | CDNA FLJ43333 fis, clone NT2RI3006376.                                                                                                                           | Go Component not found |
| Q70CQ4 | [Ubiquitin carboxyl-terminal hydrolase 31 (EC 3.1.2.15) (Ubiquitin, thioesterase 31) (Ubiquitin-specific-processing protease 31), (Deubiquitinating enzyme 31).] | Go Component not found |
| Q9H2L5 | Ras association domain-containing protein 4.                                                                                                                     | Go Component not found |
| Q149N8 | [E3 ubiquitin-protein ligase SHPRH (EC 6.3.2.-) (EC 3.6.1.-) (SNF2,, histone-linker, PHD and RING finger domain-containing helicase).]                           | Go Component not found |
| Q8IZC4 | Pleckstrin homology domain-containing family K member 1 (Rhotekin-2).                                                                                            | Go Component not found |

|        |                                                                                                                                                                                                                                      |                        |
|--------|--------------------------------------------------------------------------------------------------------------------------------------------------------------------------------------------------------------------------------------|------------------------|
| Q8N1K5 | Uncharacterized protein C6orf190.                                                                                                                                                                                                    | Go Component not found |
| Q96MF7 | [E3 SUMO-protein ligase NSE2 (EC 6.-.-.) (Non-structural maintenance, of chromosomes element 2 homolog) (Non-SMC element 2 homolog), (hMMS21).]                                                                                      | Go Component not found |
| Q8N7W6 | CDNA FLJ40265 fis, clone TESTI2026291.                                                                                                                                                                                               | Go Component not found |
| Q8NAA3 | CDNA FLJ35700 fis, clone SPLEN2019985.                                                                                                                                                                                               | Go Component not found |
| Q8NAT4 | CDNA FLJ34815 fis, clone NT2NE2007786.                                                                                                                                                                                               | Go Component not found |
| Q8NBZ9 | Putative uncharacterized protein C1orf118.                                                                                                                                                                                           | Go Component not found |
| Q8TD25 | Seizure 6 homolog.                                                                                                                                                                                                                   | Go Component not found |
| Q96BZ3 | HAGHL protein (Hydroxyacylglutathione hydrolase-like, isoform CRA_h).                                                                                                                                                                | Go Component not found |
| Q96JI6 | KIAA1841 protein (Fragment).                                                                                                                                                                                                         | Go Component not found |
| Q9BTE6 | Alanyl-tRNA synthetase domain-containing protein 1.                                                                                                                                                                                  | Go Component not found |
| Q9H3S5 | [GPI mannosyltransferase 1 (EC 2.4.1.-) (GPI mannosyltransferase I), (GPI-MT-I) (Phosphatidylinositol-glycan biosynthesis class M protein), (PIG-M).]                                                                                | Go Component not found |
| Q86TU7 | SET domain-containing protein 3.                                                                                                                                                                                                     | Go Component not found |
| Q9H8H0 | Nucleolar protein 11.                                                                                                                                                                                                                | Go Component not found |
| Q9HD47 | MOG1 isoform A (RAN guanine nucleotide release factor, isoform CRA_a).                                                                                                                                                               | Go Component not found |
| Q9NUJ7 | [Phosphatidylinositol-specific phospholipase C X domain-containing, protein 1 (PI-PLC X domain-containing protein 1).]                                                                                                               | Go Component not found |
| P59510 | [ADAMTS-20 precursor (EC 3.4.24.-) (A disintegrin and metalloproteinase, with thrombospondin motifs 20) (ADAM-TS 20) (ADAM-TS20).]                                                                                                   | Go Component not found |
| Q9H2I8 | Uncharacterized protein C10orf11.                                                                                                                                                                                                    | Go Component not found |
| P10645 | [Chromogranin-A precursor (CgA) (Pituitary secretory protein I) (SP-I), [Contains: Vasostatin-1 (Vasostatin I); Vasostatin-2 (Vasostatin II);, EA-92; ES-43; Pancreastatin; SS-18; WA-8; WE-14; LF-19; AL-11; GV-19; GR-44; ER-37].] | Go Component not found |
| P0C0L5 | [Complement C4-B precursor (Basic complement C4) [Contains: Complement, C4 beta chain; Complement C4-B alpha chain; C4a anaphylatoxin; C4b-B; C4d-B; Complement C4 gamma chain].]                                                    | Go Component not found |
| Q96KN2 | [Beta-Ala-His dipeptidase precursor (EC 3.4.13.20) (Carnosine, dipeptidase 1) (CNDP dipeptidase 1) (Serum carnosinase) (Glutamate, carboxypeptidase-like protein 2).]                                                                | Go Component not found |
| O94985 | Calsyntenin-1 precursor.                                                                                                                                                                                                             | Go Component not found |
| Q9HCS5 | Band 4.1-like protein 4A (Protein NBL4).                                                                                                                                                                                             | Go Component not found |
| Q8TBR7 | Protein FAM57A (CT120 protein).                                                                                                                                                                                                      | Go Component not found |
| Q5T200 | Zinc finger CCCH domain-containing protein 13.                                                                                                                                                                                       | Go Component not found |
| Q9P2N7 | Kelch-like protein 13 (BTB and kelch domain-containing protein 2).                                                                                                                                                                   | Go Component not found |
| Q96PG2 | Membrane-spanning 4-domains subfamily A member 10.                                                                                                                                                                                   | Go Component not found |
| Q8NEM0 | Microcephalin.                                                                                                                                                                                                                       | Go Component not found |
| Q8NC67 | [Neuropilin and tolloid-like protein 2 precursor (Brain-specific, transmembrane protein containing 2 CUB and 1 LDL-receptor class A, domains protein 2).]                                                                            | Go Component not found |
| Q9P121 | Neurotrimin precursor (hNT).                                                                                                                                                                                                         | Go Component not found |
| Q9H668 | Oligonucleotide/oligosaccharide-binding fold-containing protein 1.                                                                                                                                                                   | Go Component not found |
| Q9UGF6 | Olfactory receptor 5V1 (Olfactory receptor OR6-26) (Hs6M1-21).                                                                                                                                                                       | Go Component not found |
| P16499 | [Rod cGMP-specific 3',5'-cyclic phosphodiesterase subunit alpha, (EC 3.1.4.35) (GMP-PDE alpha) (PDE V-B1).]                                                                                                                          | Go Component not found |



|        |                                                                                                                                                        |                        |
|--------|--------------------------------------------------------------------------------------------------------------------------------------------------------|------------------------|
| P33764 | Protein S100-A3 (S100 calcium-binding protein A3) (Protein S-100E).                                                                                    | Go Component not found |
| Q8WVM8 | [Sec1 family domain-containing protein 1 (Syntaxin-binding protein 1-, like 2) (Sly1p).]                                                               | Go Component not found |
| Q8WXD2 | Secretogranin-3 precursor (Secretogranin III) (SgIII).                                                                                                 | Go Component not found |
| Q9P2P6 | [StAR-related lipid transfer protein 9 (StARD9) (START domain-, containing protein 9).]                                                                | Go Component not found |
| Q8NG68 | Tubulin--tyrosine ligase (EC 6.3.2.25) (TTL).                                                                                                          | Go Component not found |
| O00744 | Protein Wnt-10b precursor (Wnt-12).                                                                                                                    | Go Component not found |
| Q9NUA8 | Zinc finger and BTB domain-containing protein 40.                                                                                                      | Go Component not found |
| Q14588 | Zinc finger protein 234 (Zinc finger protein 4) (HZF4).                                                                                                | Go Component not found |
| O60687 | Sushi repeat-containing protein SRPX2 precursor.                                                                                                       | Go Component not found |
| Q8N370 | [Large neutral amino acids transporter small subunit 4 (L-type amino L-, acid transporter 4) (Solute carrier family 43 member 2).]                     | Go Component not found |
| Q15818 | Neuronal pentraxin-1 precursor (NP1) (Neuronal pentraxin I) (NP-I).                                                                                    | Go Component not found |
| Q5SYE7 | NHS-like protein 1.                                                                                                                                    | Go Component not found |
| Q5T4S7 | [Zinc finger UBR1-type protein 1 (Retinoblastoma-associated factor of, 600 kDa) (600 kDa retinoblastoma protein-associated factor) (RBAF600), (p600).] | Go Component not found |
| Q5RHP9 | Uncharacterized protein C1orf173.                                                                                                                      | Go Component not found |
| Q6DHV5 | Putative uncharacterized protein C10orf130.                                                                                                            | Go Component not found |
| Q6IQ55 | Tau-tubulin kinase 2 (EC 2.7.11.1).                                                                                                                    | Go Component not found |
| Q6MZX7 | Putative uncharacterized protein DKFZp686M24218.                                                                                                       | Go Component not found |
| Q6NSJ5 | Leucine-rich repeat-containing protein 8E.                                                                                                             | Go Component not found |
| Q6PI47 | BTB/POZ domain-containing protein KCTD18.                                                                                                              | Go Component not found |
| Q6S9Z5 | Zinc finger protein 474.                                                                                                                               | Go Component not found |
| Q6UXZ0 | [Transmembrane and immunoglobulin domain-containing protein 1, precursor.]                                                                             | Go Component not found |
| Q6ZMP0 | Thrombospondin type-1 domain-containing protein 4 (Fragment).                                                                                          | Go Component not found |
| Q6ZRG3 | CDNA FLJ46373 fis, clone TEST14052132.                                                                                                                 | Go Component not found |
| Q9ULJ7 | Ankyrin repeat domain-containing protein 50.                                                                                                           | Go Component not found |
| Q4AC94 | C2 domain-containing protein 3.                                                                                                                        | Go Component not found |
| Q86SE5 | [RNA-binding Raly-like protein (hRALYL) (Heterogeneous nuclear, ribonucleoprotein C-like 3) (hnRNP core protein C-like 3).]                            | Go Component not found |
| Q86XE5 | [Dihydrodipicolinate synthase-like, mitochondrial precursor, (EC 4.-.-.-) (DHDPS-like protein).]                                                       | Go Component not found |
| Q7LBC6 | [JmjC domain-containing histone demethylation protein 2B (EC 1.14.11.-), (Jumonji domain-containing protein 1B) (Nuclear protein 5qNCA).]              | Go Component not found |
| Q7Z6J2 | [General receptor for phosphoinositides 1-associated scaffold protein, (GRP1-associated scaffold protein).]                                            | Go Component not found |
| Q8TC20 | [Cancer-associated gene 1 protein (CAGE-1) (Cancer/testis antigen 3), (CT3).]                                                                          | Go Component not found |
| Q5T8A7 | Protein KIAA0649.                                                                                                                                      | Go Component not found |
| O43147 | [Small G protein signaling modulator 2 (RUN and TBC1 domain-containing, protein 1).]                                                                   | Go Component not found |
| Q4G0P3 | Hydrocephalus-inducing protein homolog.                                                                                                                | Go Component not found |
| Q8N4P6 | Leucine-rich repeat-containing protein C10orf92.                                                                                                       | Go Component not found |
| Q8N5U1 | Putative uncharacterized protein MGC35295.                                                                                                             | Go Component not found |

|        |                                                                                                                                                                                                                        |                        |
|--------|------------------------------------------------------------------------------------------------------------------------------------------------------------------------------------------------------------------------|------------------------|
| Q8NB62 | CDNA FLJ34189 fis, clone FCBBF3017535.                                                                                                                                                                                 | Go Component not found |
| Q8IVL1 | [Neuron navigator 2 (EC 3.6.1.-) (Helicase APC down-regulated 1), (Retinoic acid inducible in neuroblastoma 1) (Steerin-2) (Pore, membrane and/or filament-interacting-like protein 2) (Unc-53 homolog, 2) (unc53H2).] | Go Component not found |
| Q8TER2 | FLJ00131 protein (Fragment).                                                                                                                                                                                           | Go Component not found |
| Q969T7 | Cytosolic 5'-nucleotidase III-like protein.                                                                                                                                                                            | Go Component not found |
| Q96ET8 | Protein FAM18B2.                                                                                                                                                                                                       | Go Component not found |
| Q96RR1 | [Twinkle protein, mitochondrial precursor (EC 3.6.1.-) (T7 gp4-like, protein with intramitochondrial nucleoid localization) (T7-like, mitochondrial DNA helicase) (Progressive external ophthalmoplegia 1, protein).]  | Go Component not found |
| Q99993 | WUGSC:H_2G3A.1 protein.                                                                                                                                                                                                | Go Component not found |
| Q9BTF7 | Calcium binding and coiled-coil domain 2.                                                                                                                                                                              | Go Component not found |
| Q9NYV6 | [RNA polymerase I-specific transcription initiation factor RRN3, (Transcription initiation factor IA) (TIF-IA).]                                                                                                       | Go Component not found |
| Q9H958 | CDNA FLJ12990 fis, clone NT2RP3000092.                                                                                                                                                                                 | Go Component not found |
| Q9NWL6 | [CDNA FLJ20752 fis, clone HEP02921 (Asparagine synthetase domain, containing 1, isoform CRA_a) (Asparagine synthetase domain containing, 1) (HCV NS3-transactivated protein 1).]                                       | Go Component not found |
| Q8TCC3 | 39S ribosomal protein L30, mitochondrial precursor (L30mt) (MRP-L30).                                                                                                                                                  | Go Component not found |
| Q6MZW2 | Follistatin-related protein 4 precursor (Follistatin-like 4).                                                                                                                                                          | Go Component not found |
| P62736 | [Actin, aortic smooth muscle (Alpha-actin-2) (Cell growth-inhibiting, gene 46 protein).]                                                                                                                               | Go Component not found |
| P61109 | Kidney androgen-regulated protein precursor (KAP) (ARP).                                                                                                                                                               | Go Component not found |
| Q8WXX4 | Ankyrin repeat and SOCS box protein 12 (ASB-12).                                                                                                                                                                       | Go Component not found |
| Q8WXX7 | Autism susceptibility gene 2 protein.                                                                                                                                                                                  | Go Component not found |
| P34820 | [Bone morphogenetic protein 8B precursor (BMP-8B) (BMP-8) (Osteogenic, protein 2) (OP-2).]                                                                                                                             | Go Component not found |
| Q9P209 | Centrosomal protein of 72 kDa (Cep72 protein).                                                                                                                                                                         | Go Component not found |
| Q5VXU9 | Uncharacterized protein C9orf84.                                                                                                                                                                                       | Go Component not found |
| Q96M20 | Uncharacterized protein C20orf152.                                                                                                                                                                                     | Go Component not found |
| Q8WUP2 | [Filamin-binding LIM protein 1 (FBLP-1) (Mitogen-inducible 2-, interacting protein) (MIG2-interacting protein) (Migfilin).]                                                                                            | Go Component not found |
| P18065 | [Insulin-like growth factor-binding protein 2 precursor (IGFBP-2) (IBP-, 2) (IGF-binding protein 2).]                                                                                                                  | Go Component not found |
| Q6TDP4 | Kelch-like protein 17 (Actinfilin).                                                                                                                                                                                    | Go Component not found |
| Q13449 | Limbic system-associated membrane protein precursor (LSAMP).                                                                                                                                                           | Go Component not found |
| Q9H4F8 | [SPARC-related modular calcium-binding protein 1 precursor (Secreted, modular calcium-binding protein 1) (SMOC-1).]                                                                                                    | Go Component not found |
| Q07617 | [Sperm-associated antigen 1 (Infertility-related sperm protein Spag-1), (HSD-3.8).]                                                                                                                                    | Go Component not found |
| Q7Z410 | [Transmembrane protease, serine 9 (EC 3.4.21.-) (Polyserase-1), (Polyserase-I) (Polyserine protease 1) [Contains: Serase-1; Serase-2; Serase-3].]                                                                      | Go Component not found |
| Q8IZJ1 | [Netrin receptor UNC5B precursor (Protein unc-5 homolog B) (Unc-5, homolog 2) (p53-regulated receptor for death and life protein 1).]                                                                                  | Go Component not found |
| Q5GH73 | XK-related protein 6.                                                                                                                                                                                                  | Go Component not found |
| Q7Z2W4 | [Zinc finger CCCH type antiviral protein 1 (Zinc finger CCCH domain-, containing protein 2).]                                                                                                                          | Go Component not found |
| Q9UK10 | Zinc finger protein 225.                                                                                                                                                                                               | Go Component not found |

|        |                                                                                                                                                           |                        |
|--------|-----------------------------------------------------------------------------------------------------------------------------------------------------------|------------------------|
| Q9BY12 | [S phase cyclin A-associated protein in the ER (Zinc finger protein, 291).]                                                                               | Go Component not found |
| O43532 | RIG-like 7-1.                                                                                                                                             | Go Component not found |
| Q5CZ94 | Putative uncharacterized protein DKFZp781M0386.                                                                                                           | Go Component not found |
| Q5EFE6 | Anti-RhD monoclonal T125 kappa light chain precursor.                                                                                                     | Go Component not found |
| Q7Z2Y5 | Nik-related protein kinase (EC 2.7.11.1).                                                                                                                 | Go Component not found |
| Q5JYT8 | Novel protein (Fragment).                                                                                                                                 | Go Component not found |
| Q5T0D9 | Protein FAM79A.                                                                                                                                           | Go Component not found |
| Q5TF21 | Uncharacterized protein C6orf174 precursor.                                                                                                               | Go Component not found |
| Q5VVM6 | Novel protein.                                                                                                                                            | Go Component not found |
| A0AV02 | Solute carrier family 12 member 8 (Cation-chloride cotransporter 9).                                                                                      | Go Component not found |
| Q9Y4C1 | [JmjC domain-containing histone demethylation protein 2A (EC 1.14.11.-), (Jumonji domain-containing protein 1A).]                                         | Go Component not found |
| Q8NGI3 | Olfactory receptor 56B1 (Olfactory receptor OR11-65).                                                                                                     | Go Component not found |
| Q6MZQ6 | Putative uncharacterized protein DKFZp686G11190.                                                                                                          | Go Component not found |
| Q6N030 | Putative uncharacterized protein DKFZp686I15212.                                                                                                          | Go Component not found |
| Q6P280 | Zinc finger protein 529.                                                                                                                                  | Go Component not found |
| Q6PIU1 | [Potassium voltage-gated channel subfamily V member 1 (Voltage-gated, potassium channel subunit Kv8.1) (Neuronal potassium channel alpha, subunit HNKA).] | Go Component not found |
| Q6TDU7 | Lung adenoma susceptibility 1-like protein (CASC1 protein).                                                                                               | Go Component not found |
| Q6ZMX3 | CDNA FLJ16614 fis, clone TEST14013365.                                                                                                                    | Go Component not found |
| Q6ZNQ8 | CDNA FLJ27323 fis, clone TMS07977.                                                                                                                        | Go Component not found |
| Q6ZRT8 | [CDNA FLJ46113 fis, clone TEST12036285, highly similar to Rattus, norvegicus ubiquitin C (Ubc).]                                                          | Go Component not found |
| Q7Z4H8 | KDEL motif-containing protein 2 precursor.                                                                                                                | Go Component not found |
| Q6ZWJ8 | Cysteine-rich BMP regulator 2.                                                                                                                            | Go Component not found |
| Q76B61 | SCO-spondin homolog (Fragment).                                                                                                                           | Go Component not found |
| A4D1E1 | Zinc finger protein 804B.                                                                                                                                 | Go Component not found |
| Q86TP7 | LAMB4 protein (Fragment).                                                                                                                                 | Go Component not found |
| Q86Y25 | [Zinc finger protein 354C (Kidney, ischemia, and developmentally-, regulated protein 3) (hKID3).]                                                         | Go Component not found |
| O14526 | FCH domain only protein 1.                                                                                                                                | Go Component not found |
| Q8IZ40 | REST corepressor 2.                                                                                                                                       | Go Component not found |
| Q8N0V7 | CDNA FLJ40969 fis, clone UTERU2012688 (CDNA FLJ40984 fis).                                                                                                | Go Component not found |
| Q8N4V6 | TMEM181 protein (Fragment).                                                                                                                               | Go Component not found |
| Q8N7Q3 | Zinc finger protein 676.                                                                                                                                  | Go Component not found |
| Q8NAS2 | CDNA FLJ34873 fis, clone NT2NE2014950.                                                                                                                    | Go Component not found |
| Q8NBX4 | CDNA FLJ90687 fis, clone PLACE1006093.                                                                                                                    | Go Component not found |
| Q8TCD6 | Pyridoxal phosphate phosphatase PHOSPHO2 (EC 3.1.3.74).                                                                                                   | Go Component not found |
| Q96J66 | [ATP-binding cassette transporter sub-family C member 11 (Multidrug, resistance-associated protein 8).]                                                   | Go Component not found |
| Q8WY69 | PP4534.                                                                                                                                                   | Go Component not found |

|        |                                                                                                                                                                                                                                                             |                        |
|--------|-------------------------------------------------------------------------------------------------------------------------------------------------------------------------------------------------------------------------------------------------------------|------------------------|
| Q96HQ4 | DUSP3 protein.                                                                                                                                                                                                                                              | Go Component not found |
| Q5TGI0 | Uncharacterized protein C6orf168.                                                                                                                                                                                                                           | Go Component not found |
| Q86UV5 | [Ubiquitin carboxyl-terminal hydrolase 48 (EC 3.1.2.15) (Ubiquitin, thioesterase 48) (Ubiquitin-specific-processing protease 48), (Deubiquitinating enzyme 48).]                                                                                            | Go Component not found |
| Q6P2H3 | Coiled-coil domain-containing protein 21.                                                                                                                                                                                                                   | Go Component not found |
| Q9HBL8 | NmrA-like family domain-containing protein 1.                                                                                                                                                                                                               | Go Component not found |
| Q9NWS3 | CDNA FLJ20639 fis, clone KAT02950.                                                                                                                                                                                                                          | Go Component not found |
| Q9UDW8 | WUGSC:H_DJ0747G18.3 protein (VGF nerve growth factor inducible).                                                                                                                                                                                            | Go Component not found |
| Q9UKA4 | [A-kinase anchor protein 11 (Protein kinase A-anchoring protein 11), (PRKA11) (A kinase anchor protein 220 kDa) (AKAP 220) (hAKAP220).]                                                                                                                     | Go Component not found |
| P52824 | [Diacylglycerol kinase theta (EC 2.7.1.107) (Diglyceride kinase theta), (DGK-theta) (DAG kinase theta).]                                                                                                                                                    | Go Component not found |
| Q9NS73 | [MAP3K12-binding inhibitory protein 1 (MAPK upstream kinase-binding, inhibitory protein) (MUK-binding inhibitory protein).]                                                                                                                                 | Go Component not found |
| P45983 | [Mitogen-activated protein kinase 8 (EC 2.7.11.24) (Stress-activated, protein kinase JNK1) (c-Jun N-terminal kinase 1) (JNK-46).]                                                                                                                           | Go Component not found |
| Q99886 | Receptor tyrosine kinase (Fragment).                                                                                                                                                                                                                        | Go Component not found |
| P05129 | Protein kinase C gamma type (EC 2.7.11.13) (PKC-gamma).                                                                                                                                                                                                     | Go Component not found |
| P42680 | Tyrosine-protein kinase Tec (EC 2.7.10.2).                                                                                                                                                                                                                  | Go Component not found |
| Q96MA6 | Putative adenylate kinase-like protein C9orf98 (EC 2.7.4.3).                                                                                                                                                                                                | Go Component not found |
| Q13237 | [cGMP-dependent protein kinase 2 (EC 2.7.11.12) (CGK 2) (cGKII) (Type, II cGMP-dependent protein kinase).]                                                                                                                                                  | Go Component not found |
| Q68DD2 | [Cytosolic phospholipase A2 zeta (EC 3.1.1.4) (cPLA2-zeta), (Phospholipase A2 group IVF).]                                                                                                                                                                  | Go Component not found |
| Q96AD5 | [Patatin-like phospholipase domain-containing protein 2 (EC 3.1.1.3), (Adipose triglyceride lipase) (Desnutrin) (Transport-secretion protein, 2) (TTS2) (TTS2.2) (Calcium-independent phospholipase A2) (IPLA2-zeta), (Pigment epithelium-derived factor).] | Go Component not found |
| Q06278 | Aldehyde oxidase (EC 1.2.3.1).                                                                                                                                                                                                                              | Go Component not found |
| Q9HB55 | Cytochrome P450 3A43 (EC 1.14.14.1).                                                                                                                                                                                                                        | Go Component not found |
| P19623 | [Spermidine synthase (EC 2.5.1.16) (Putrescine aminopropyltransferase), (SPDSY).]                                                                                                                                                                           | Go Component not found |
| Q5JS39 | Tubulin tyrosine ligase-like family, member 11.                                                                                                                                                                                                             | Go Component not found |
| Q5KTR3 | Flavoprotein oxidoreductase.                                                                                                                                                                                                                                | Go Component not found |
| P04075 | [Fructose-bisphosphate aldolase A (EC 4.1.2.13) (Muscle-type aldolase), (Lung cancer antigen NY-LU-1).]                                                                                                                                                     | Go Component not found |
| Q93088 | Betaine-homocysteine S-methyltransferase 1 (EC 2.1.1.5).                                                                                                                                                                                                    | Go Component not found |
| Q5TD12 | [Serine palmitoyltransferase, long chain base subunit 2-like, (Aminotransferase 2) (Fragment).]                                                                                                                                                             | Go Component not found |
| Q9Y2P4 | [Long-chain fatty acid transport protein 6 (Fatty acid transport, protein 6) (FATP-6) (Very long-chain acyl-CoA synthetase homolog 1), (VLCSH1) (hVLCS-H1) (Fatty-acid-coenzyme A ligase, very long-chain 2), (Solute carrier family 27 member 6).]         | Go Component not found |
| Q9C0C9 | [Ubiquitin-conjugating enzyme E2 O (EC 6.3.2.19) (Ubiquitin-protein, ligase O) (Ubiquitin carrier protein O) (Ubiquitin-conjugating enzyme, E2 of 230 kDa) (E2-230K).]                                                                                      | Go Component not found |
| P08319 | [Alcohol dehydrogenase 4 (EC 1.1.1.1) (Alcohol dehydrogenase class II, pi chain).]                                                                                                                                                                          | Go Component not found |
| Q9Y600 | [Cysteine sulfinic acid decarboxylase (EC 4.1.1.29) (Sulfinoalanine, decarboxylase) (Cysteine-sulfinate decarboxylase).]                                                                                                                                    | Go Component not found |
| Q5T013 | [Putative hydroxypyruvate isomerase (EC 5.3.1.22) (Endothelial cell, apoptosis protein E-CE1).]                                                                                                                                                             | Go Component not found |
| Q9Y302 | [Protein GPR89 (Putative MAPK-activating protein PM01) (Putative NF-, kappa-B-activating protein 90).]                                                                                                                                                      | Go Component not found |
| Q9H3M0 | [Potassium voltage-gated channel subfamily F member 1 (Voltage-gated, potassium channel subunit Kv5.1) (kH1).]                                                                                                                                              | Go Component not found |

|        |                                                                                                                                                                                                                                                                                                                                                                                                                                                                                                                         |                        |
|--------|-------------------------------------------------------------------------------------------------------------------------------------------------------------------------------------------------------------------------------------------------------------------------------------------------------------------------------------------------------------------------------------------------------------------------------------------------------------------------------------------------------------------------|------------------------|
| Q8NFN6 | RGS3 isoform RGS3S.                                                                                                                                                                                                                                                                                                                                                                                                                                                                                                     | Go Component not found |
| P53675 | Clathrin heavy chain 2 (CLH-22).                                                                                                                                                                                                                                                                                                                                                                                                                                                                                        | Go Component not found |
| Q93034 | [Cullin-5 (CUL-5) (Vasopressin-activated calcium-mobilizing receptor), (VACM-1).]                                                                                                                                                                                                                                                                                                                                                                                                                                       | Go Component not found |
| Q9UKY4 | [Protein O-mannosyl-transferase 2 (EC 2.4.1.109) (Dolichyl-phosphate-, mannose--protein mannosyltransferase 2).]                                                                                                                                                                                                                                                                                                                                                                                                        | Go Component not found |
| P05060 | [Secretogranin-1 precursor (Secretogranin I) (Sgl) (Chromogranin-B), (CgB) [Contains: GAWK peptide; CCB peptide].]                                                                                                                                                                                                                                                                                                                                                                                                      | Go Component not found |
| Q14524 | [Sodium channel protein type 5 subunit alpha (Sodium channel protein, type V subunit alpha) (Voltage-gated sodium channel subunit alpha, Nav1.5) (Sodium channel protein cardiac muscle subunit alpha) (HH1).]                                                                                                                                                                                                                                                                                                          | Go Component not found |
| O15240 | Neurosecretory protein VGF precursor.                                                                                                                                                                                                                                                                                                                                                                                                                                                                                   | Go Component not found |
| Q15678 | [Tyrosine-protein phosphatase non-receptor type 14 (EC 3.1.3.48), (Protein-tyrosine phosphatase pez).]                                                                                                                                                                                                                                                                                                                                                                                                                  | Go Component not found |
| Q9NRR6 | [72 kDa inositol polyphosphate 5-phosphatase (EC 3.1.3.36), (Phosphatidylinositol-4,5-bisphosphate 5-phosphatase), (Phosphatidylinositol polyphosphate 5-phosphatase type IV).]                                                                                                                                                                                                                                                                                                                                         | Go Component not found |
| P01034 | [Cystatin-C precursor (Cystatin-3) (Neuroendocrine basic polypeptide), (Gamma-trace) (Post-gamma-globulin).]                                                                                                                                                                                                                                                                                                                                                                                                            | Go Component not found |
| Q6HA08 | [Astacin-like metalloendopeptidase precursor (EC 3.4.-.-) (Oocyte, astacin) (Ovastacin).]                                                                                                                                                                                                                                                                                                                                                                                                                               | Go Component not found |
| Q7KZ97 | Antithrombin III variant.                                                                                                                                                                                                                                                                                                                                                                                                                                                                                               | Go Component not found |
| Q9UBX7 | [Kallikrein-11 precursor (EC 3.4.21.-) (hK11) (Hippostasin) (Trypsin-, like protease) (Serine protease 20) [Contains: Kallikrein-11 inactive, chain 1; Kallikrein-11 inactive chain 2].]                                                                                                                                                                                                                                                                                                                                | Go Component not found |
| Q8IZJ3 | C3 and PZP-like alpha-2-macroglobulin domain-containing protein 8.                                                                                                                                                                                                                                                                                                                                                                                                                                                      | Go Component not found |
| P01024 | [Complement C3 precursor [Contains: Complement C3 beta chain;, Complement C3 alpha chain; C3a anaphylatoxin; Complement C3b alpha', chain; Complement C3c alpha' chain fragment 1; Complement C3dg, fragment; Complement C3g fragment; Complement C3d fragment; Complement, C3f fragment; Complement C3c alpha' chain fragment 2].]                                                                                                                                                                                     | Go Component not found |
| Q9NZT2 | [Opioid growth factor receptor (OGFr) (Zeta-type opioid receptor) (7-60, protein).]                                                                                                                                                                                                                                                                                                                                                                                                                                     | Go Component not found |
| Q15247 | 33.1 kDa protein.                                                                                                                                                                                                                                                                                                                                                                                                                                                                                                       | Go Component not found |
| O15309 | Endogenous retroviral sequence K(C4) 2 (Fragment).                                                                                                                                                                                                                                                                                                                                                                                                                                                                      | Go Component not found |
| Q6ZPD6 | CDNA FLJ25992 fis, clone DMC03508.                                                                                                                                                                                                                                                                                                                                                                                                                                                                                      | Go Component not found |
| Q9UN79 | [SOX-13 protein (Type 1 diabetes autoantigen ICA12) (Islet cell antigen, 12).]                                                                                                                                                                                                                                                                                                                                                                                                                                          | Go Component not found |
| Q12986 | [Transcriptional repressor NF-X1 (EC 6.3.2.-) (Nuclear transcription, factor, X box-binding, 1).]                                                                                                                                                                                                                                                                                                                                                                                                                       | Go Component not found |
| Q8N950 | CDNA FLJ38364 fis, clone FEBRA2000909 (HCG1978990).                                                                                                                                                                                                                                                                                                                                                                                                                                                                     | Go Component not found |
| P78381 | [UDP-galactose translocator (UDP-galactose transporter) (UGT) (UDP-Gal-, Tr) (Solute carrier family 35 member A2).]                                                                                                                                                                                                                                                                                                                                                                                                     | Go Component not found |
| P02751 | [Fibronectin precursor (FN) (Cold-insoluble globulin) (CIG) [Contains:, Ugl-Y1; Ugl-Y2; Ugl-Y3].]                                                                                                                                                                                                                                                                                                                                                                                                                       | Golgi                  |
| Q7Z3U7 | Protein MON2 homolog (Protein SF21).                                                                                                                                                                                                                                                                                                                                                                                                                                                                                    | Golgi                  |
| Q9UBV7 | [Beta-1,4-galactosyltransferase 7 (EC 2.4.1.-) (Beta-1,4-GalTase 7), (Beta4Gal-T7) (b4Gal-T7) (UDP-galactose:beta-N-acetylglucosamine beta-, 1,4-galactosyltransferase 7) (UDP-Gal:beta-GlcNAc beta-1,4-, galactosyltransferase 7) [Includes: Xylosylprotein 4-beta-, galactosyltransferase (EC 2.4.1.133) (UDP-galactose:beta-xylose beta-, 1,4-galactosyltransferase) (Xylosylprotein beta-1,4-, galactosyltransferase) (XGPT) (Proteoglycan UDP-galactose:beta-xylose, beta1,4-galactosyltransferase I) (XGalT-1)].] | Golgi                  |
| O14795 | Protein unc-13 homolog B (Munc13-2) (munc13).                                                                                                                                                                                                                                                                                                                                                                                                                                                                           | Golgi                  |
| Q9Y6M9 | [NADH dehydrogenase [ubiquinone] 1 beta subcomplex subunit 9, (EC 1.6.5.3) (EC 1.6.99.3) (NADH-ubiquinone oxidoreductase B22, subunit) (Complex I-B22) (CI-B22).]                                                                                                                                                                                                                                                                                                                                                       | Mitochondrial          |

|        |                                                                                                                                                                                                                                                                                                                                 |                          |
|--------|---------------------------------------------------------------------------------------------------------------------------------------------------------------------------------------------------------------------------------------------------------------------------------------------------------------------------------|--------------------------|
| P47985 | [Cytochrome b-c1 complex subunit Rieske, mitochondrial precursor, (EC 1.10.2.2) (Ubiquinol-cytochrome c reductase iron-sulfur subunit), (Rieske iron-sulfur protein) (RISP) (Complex III subunit 5) [Contains:, Cytochrome b-c1 complex subunit 11 (Ubiquinol-cytochrome c reductase 8, kDa protein) (Complex III subunit IX).] | Mitochondrial            |
| Q969V5 | [RING finger protein C1orf166 (Putative NF-kappa-B-activating protein, 266).]                                                                                                                                                                                                                                                   | Mitochondrial            |
| Q9H936 | [Mitochondrial glutamate carrier 1 (GC-1) (Glutamate/H(+) symporter 1), (Solute carrier family 25 member 22).]                                                                                                                                                                                                                  | Mitochondrial            |
| P48547 | [Potassium voltage-gated channel subfamily C member 1 (Voltage-gated, potassium channel subunit Kv3.1) (Kv4) (NGK2).]                                                                                                                                                                                                           | Neural                   |
| O95180 | [Voltage-dependent T-type calcium channel subunit alpha-1H (Voltage-, gated calcium channel subunit alpha Cav3.2) (Low-voltage-activated, calcium channel alpha1 3.2 subunit).]                                                                                                                                                 | Neural                   |
| Q9UNX9 | [ATP-sensitive inward rectifier potassium channel 14 (Potassium, channel, inwardly rectifying subfamily J member 14) (Inward rectifier, K(+) channel Kir2.4) (IRK4).]                                                                                                                                                           | Neural                   |
| Q02641 | [Voltage-dependent L-type calcium channel subunit beta-1 (CAB1), (Calcium channel voltage-dependent subunit beta 1).]                                                                                                                                                                                                           | Neural                   |
| Q9H6Z4 | Ran-binding protein 3 (RanBP3).                                                                                                                                                                                                                                                                                                 | Nuclear                  |
| Q9UQ88 | [PITSLRE serine/threonine-protein kinase CDC2L2 (EC 2.7.11.22), (Galactosyltransferase-associated protein kinase p58/GTA) (Cell, division cycle 2-like protein kinase 2) (CDK11).]                                                                                                                                              | Nuclear                  |
| P38159 | [Heterogeneous nuclear ribonucleoprotein G (hnRNP G) (RNA-binding motif, protein, X chromosome) (Glycoprotein p43) [Contains: Processed, heterogeneous nuclear ribonucleoprotein G].]                                                                                                                                           | Nuclear                  |
| Q96ST3 | [Paired amphipathic helix protein Sin3a (Transcriptional corepressor, Sin3a) (Histone deacetylase complex subunit Sin3a).]                                                                                                                                                                                                      | Nuclear                  |
| Q68CN7 | Putative uncharacterized protein DKFZp78111252.                                                                                                                                                                                                                                                                                 | Nuclear                  |
| Q6ZNQ5 | [CDNA FLJ27339 fis, clone TMS09615, highly similar to TFIIH basal, transcription factor complex helicase subunit (EC 3.6.1.-).]                                                                                                                                                                                                 | Nuclear                  |
| Q6ZP55 | [CDNA FLJ26482 fis, clone KDN05127 (Putative uncharacterized protein, DKFZp686G16228).]                                                                                                                                                                                                                                         | Nuclear                  |
| Q9UIS9 | [Methyl-CpG-binding domain protein 1 (Methyl-CpG-binding protein MBD1), (Protein containing methyl-CpG-binding domain 1).]                                                                                                                                                                                                      | Nuclear                  |
| Q14980 | Nuclear mitotic apparatus protein 1 (NuMA protein) (SP-H antigen).                                                                                                                                                                                                                                                              | Nuclear                  |
| P22626 | Heterogeneous nuclear ribonucleoproteins A2/B1 (hnRNP A2 / hnRNP B1).                                                                                                                                                                                                                                                           | Nuclear                  |
| P55771 | Paired box protein Pax-9.                                                                                                                                                                                                                                                                                                       | Nuclear                  |
| P15822 | [Zinc finger protein 40 (Human immunodeficiency virus type I enhancer-, binding protein 1) (HIV-EP1) (Major histocompatibility complex-binding, protein 1) (MBP-1) (Positive regulatory domain II-binding factor 1), (PRDII-BF1).]                                                                                              | Nuclear                  |
| Q86VE0 | Putative uncharacterized protein LOC339344.                                                                                                                                                                                                                                                                                     | Nuclear                  |
| Q96S19 | Spermatid perinuclear RNA-binding protein.                                                                                                                                                                                                                                                                                      | Nuclear                  |
| Q9UNH5 | [Dual specificity protein phosphatase CDC14A (EC 3.1.3.48), (EC 3.1.3.16) (CDC14 cell division cycle 14 homolog A).]                                                                                                                                                                                                            | Nuclear                  |
| Q14192 | [Four and a half LIM domains protein 2 (FHL-2) (Skeletal muscle LIM-, protein 3) (SLIM 3) (LIM domain protein DRAL).]                                                                                                                                                                                                           | Nuclear                  |
| P48552 | [Nuclear receptor-interacting protein 1 (Nuclear factor RIP140), (Receptor-interacting protein 140).]                                                                                                                                                                                                                           | Nuclear                  |
| Q13342 | [Nuclear body protein SP140 (Nuclear autoantigen Sp-140) (Speckled 140, kDa) (LYSp100 protein) (Lymphoid-restricted homolog of Sp100).]                                                                                                                                                                                         | Nuclear                  |
| Q9NPG3 | Ubiquitin (Ubiquitously expressed nuclear protein) (VT4).                                                                                                                                                                                                                                                                       | Nuclear                  |
| O95373 | Importin-7 (Imp7) (Ran-binding protein 7) (RanBP7).                                                                                                                                                                                                                                                                             | Nuclear Membrane         |
| Q08043 | [Alpha-actinin-3 (Alpha-actinin skeletal muscle isoform 3) (F-actin, cross-linking protein).]                                                                                                                                                                                                                                   | Other Filament or Tubule |
| P41208 | Centrin-2 (Caltractin isoform 1).                                                                                                                                                                                                                                                                                               | Other Filament or Tubule |
| Q9NZQ3 | [SH3 adapter protein SPIN90 (NCK-interacting protein with SH3 domain), (SH3 protein interacting with Nck, 90 kDa) (VacA-interacting protein., 54 kDa) (VIP54) (AF3p21) (Diaphanous protein-interacting protein), (Dia-interacting protein 1) (DIP-1).]                                                                          | Other Filament or Tubule |

|        |                                                                                                                                                                                                                          |                          |
|--------|--------------------------------------------------------------------------------------------------------------------------------------------------------------------------------------------------------------------------|--------------------------|
| P04264 | [Keratin, type II cytoskeletal 1 (Cytokeratin-1) (CK-1) (Keratin-1), (K1) (67 kDa cytokeratin) (Hair alpha protein).]                                                                                                    | Other Filament or Tubule |
| Q15029 | [116 kDa U5 small nuclear ribonucleoprotein component (U5 snRNP-, specific protein, 116 kDa) (U5-116 kDa) (Elongation factor Tu GTP-, binding domain protein 2) (hSNU114).]                                              | Other Go Component       |
| Q92870 | [Amyloid beta A4 precursor protein-binding family B member 2 (Fe65-like, protein).]                                                                                                                                      | Other Go Component       |
| P42566 | [Epidermal growth factor receptor substrate 15 (Protein Eps15) (AF-1p, protein).]                                                                                                                                        | Other Go Component       |
| Q15517 | Corneodesmosin precursor (S protein).                                                                                                                                                                                    | Other Go Component       |
| P01619 | Ig kappa chain V-III region B6.                                                                                                                                                                                          | Other Go Component       |
| Q9P241 | Probable phospholipid-transporting ATPase VD (EC 3.6.3.1) (ATPVD).                                                                                                                                                       | Other Membrane           |
| P29323 | [Ephrin type-B receptor 2 precursor (EC 2.7.10.1) (Tyrosine-protein, kinase receptor EPH-3) (DRT) (Receptor protein-tyrosine kinase HEK5), (ERK) (Tyrosine-protein kinase TYRO5) (Renal carcinoma antigen NY-REN-, 47).] | Other Membrane           |
| P04220 | Ig mu heavy chain disease protein (BOT).                                                                                                                                                                                 | Other Membrane           |
| O00631 | Sarcopin.                                                                                                                                                                                                                | Other Membrane           |
| Q7LFX5 | [N-acetylgalactosamine 4-sulfate 6-O-sulfotransferase (EC 2.8.2.33), (GalNAc4S-6ST) (B-cell RAG-associated gene protein) (hBRAG).]                                                                                       | Other Membrane           |
| P51693 | Amyloid-like protein 1 precursor (APLP) (APLP-1) [Contains: C30].                                                                                                                                                        | Other Membrane           |
| Q93045 | Stathmin-2 (Protein SCG10) (Superior cervical ganglion-10 protein).                                                                                                                                                      | Other Membrane           |
| Q9NP80 | [Calcium-independent phospholipase A2-gamma (EC 3.1.1.5) (Intracellular, membrane-associated calcium-independent phospholipase A2 gamma), (iPLA2-gamma) (Patatin-like phospholipase domain-containing protein, 8).]      | Other Membrane           |
| Q86UD5 | [NHEDC2 protein (Putative uncharacterized protein LOC133308) (CDNA, FLJ23984 fis, clone HEP22543).]                                                                                                                      | Other Membrane           |
| P13726 | [Tissue factor precursor (TF) (Coagulation factor III) (Thromboplastin), (CD142 antigen).]                                                                                                                               | Other Membrane           |
| Q07065 | Cytoskeleton-associated protein 4 (63 kDa membrane protein) (p63).                                                                                                                                                       | Other Membrane           |
| O60883 | [Endothelin B receptor-like protein 2 precursor (ETBR-LP-2) (G-protein, coupled receptor 37-like 1).]                                                                                                                    | Other Membrane           |
| Q96PD7 | [Diacylglycerol O-acyltransferase 2 (EC 2.3.1.20) (Diglyceride, acyltransferase 2).]                                                                                                                                     | Other Membrane           |
| P29475 | [Nitric-oxide synthase, brain (EC 1.14.13.39) (NOS type I) (Neuronal, NOS) (N-NOS) (nNOS) (Constitutive NOS) (NC-NOS) (bNOS).]                                                                                           | Other Membrane           |
| Q8WZA2 | [Rap guanine nucleotide exchange factor 4 (cAMP-regulated guanine, nucleotide exchange factor II) (cAMP-GEFII) (Exchange factor directly, activated by cAMP 2) (Epac 2).]                                                | Other Membrane           |
| Q6ZMB0 | [UDP-GlcNAc:betaGal beta-1,3-N-acetylglucosaminyltransferase 6, (EC 2.4.1.-) (Beta3Gn-T6) (BGnT-6) (Beta-1,3-N-, acetylglucosaminyltransferase-6) (Core 3 synthase).]                                                    | Other Membrane           |
| Q96RY8 | [Putative chloride channel protein 7 (Chloride channel 7, isoform, CRA_b).]                                                                                                                                              | Other Membrane           |
| O75976 | [Carboxypeptidase D precursor (EC 3.4.17.22) (Metalloprotease, D) (gp180).]                                                                                                                                              | Other Membrane           |
| Q14868 | Effector cell protease receptor 1 (Fragment).                                                                                                                                                                            | Other Membrane           |
| Q5EGP2 | G protein-coupled receptor 112.                                                                                                                                                                                          | Other Membrane           |
| Q15391 | [P2Y purinoceptor 14 (P2Y14) (UDP-glucose receptor) (G-protein coupled, receptor 105).]                                                                                                                                  | Other Membrane           |
| Q86UC7 | Solute carrier family 5 (Sodium/glucose cotransporter), member 12.                                                                                                                                                       | Other Membrane           |
| Q13621 | [Solute carrier family 12 member 1 (Bumetanide-sensitive sodium-, (potassium)-chloride cotransporter 2) (Kidney-specific Na-K-Cl, symporter).]                                                                           | Other Membrane           |
| O95342 | Bile salt export pump (ATP-binding cassette sub-family B member 11).                                                                                                                                                     | Plasma Membrane          |

|        |                                                                                                                                                                                                                                                                                                                                                                                                                                                                                                                                                                                                                                                                                                                        |                 |
|--------|------------------------------------------------------------------------------------------------------------------------------------------------------------------------------------------------------------------------------------------------------------------------------------------------------------------------------------------------------------------------------------------------------------------------------------------------------------------------------------------------------------------------------------------------------------------------------------------------------------------------------------------------------------------------------------------------------------------------|-----------------|
| Q08345 | [Epithelial discoidin domain-containing receptor 1 precursor, (EC 2.7.10.1) (Epithelial discoidin domain receptor 1) (Tyrosine, kinase DDR) (Discoidin receptor tyrosine kinase) (Tyrosine-protein, kinase CAK) (Cell adhesion kinase) (TRK E) (Protein-tyrosine kinase, RTK 6) (HGK2) (CD167a antigen).]                                                                                                                                                                                                                                                                                                                                                                                                              | Plasma Membrane |
| Q9Y2J2 | [Band 4.1-like protein 3 (4.1B) (Differentially expressed in, adenocarcinoma of the lung protein 1) (DAL-1).]                                                                                                                                                                                                                                                                                                                                                                                                                                                                                                                                                                                                          | Plasma Membrane |
| P48995 | Short transient receptor potential channel 1 (TrpC1) (TRP-1 protein).                                                                                                                                                                                                                                                                                                                                                                                                                                                                                                                                                                                                                                                  | Plasma Membrane |
| P05067 | [Amyloid beta A4 protein precursor (APP) (ABPP) (Alzheimer disease, amyloid protein) (Cerebral vascular amyloid peptide) (CVAP) (Protease, nexin-II) (PN-II) (APP1) (PreA4) [Contains: Soluble APP-alpha (S-APP-, alpha); Soluble APP-beta (S-APP-beta); C99; Beta-amyloid protein 42, (Beta-APP42); Beta-amyloid protein 40 (Beta-APP40); C83; P3(42);, P3(40); Gamma-CTF(59) (Gamma-secretase C-terminal fragment 59), (Amyloid intracellular domain 59) (AID(59)) (AICD-59); Gamma-CTF(57), (Gamma-secretase C-terminal fragment 57) (Amyloid intracellular domain, 57) (AID(57)) (AICD-57); Gamma-CTF(50) (Gamma-secretase C-terminal, fragment 50) (Amyloid intracellular domain 50) (AID(50)) (AICD-50);, C31].] | Plasma Membrane |
| P13569 | [Cystic fibrosis transmembrane conductance regulator (CFTR) (cAMP-, dependent chloride channel) (ATP-binding cassette transporter sub-, family C member 7).]                                                                                                                                                                                                                                                                                                                                                                                                                                                                                                                                                           | Plasma Membrane |
| P11362 | [Basic fibroblast growth factor receptor 1 precursor (EC 2.7.10.1), (FGFR-1) (bFGF-R) (Fms-like tyrosine kinase 2) (c-fgr) (CD331, antigen).]                                                                                                                                                                                                                                                                                                                                                                                                                                                                                                                                                                          | Plasma Membrane |
| P38646 | [Stress-70 protein, mitochondrial precursor (75 kDa glucose-regulated, protein) (GRP 75) (Heat shock 70 kDa protein 9) (Peptide-binding, protein 74) (PBP74) (Mortalin) (MOT).]                                                                                                                                                                                                                                                                                                                                                                                                                                                                                                                                        | Plasma Membrane |
| P05556 | [Integrin beta-1 precursor (Fibronectin receptor subunit beta), (Integrin VLA-4 subunit beta) (CD29 antigen).]                                                                                                                                                                                                                                                                                                                                                                                                                                                                                                                                                                                                         | Plasma Membrane |
| Q92823 | [Neuronal cell adhesion molecule precursor (Nr-CAM) (NgCAM-related cell, adhesion molecule) (Ng-CAM-related) (hBravo).]                                                                                                                                                                                                                                                                                                                                                                                                                                                                                                                                                                                                | Plasma Membrane |
| Q13332 | [Receptor-type tyrosine-protein phosphatase S precursor (EC 3.1.3.48), (R-PTP-S) (Protein-tyrosine phosphatase sigma) (R-PTP-sigma).]                                                                                                                                                                                                                                                                                                                                                                                                                                                                                                                                                                                  | Plasma Membrane |
| Q07157 | [Tight junction protein ZO-1 (Zonula occludens protein 1) (Zona, occludens protein 1) (Tight junction protein 1).]                                                                                                                                                                                                                                                                                                                                                                                                                                                                                                                                                                                                     | Plasma Membrane |
| O60469 | Down syndrome cell adhesion molecule precursor (CHD2).                                                                                                                                                                                                                                                                                                                                                                                                                                                                                                                                                                                                                                                                 | Plasma Membrane |
| Q92859 | Neogenin precursor.                                                                                                                                                                                                                                                                                                                                                                                                                                                                                                                                                                                                                                                                                                    | Plasma Membrane |
| Q9Y513 | Protocadherin alpha 1 precursor (PCDH-alpha1).                                                                                                                                                                                                                                                                                                                                                                                                                                                                                                                                                                                                                                                                         | Plasma Membrane |
| Q9UHC3 | [Amiloride-sensitive cation channel 3 (Acid-sensing ion channel 3), (ASIC3) (hASIC3) (Testis sodium channel 1) (hTNaC1).]                                                                                                                                                                                                                                                                                                                                                                                                                                                                                                                                                                                              | Plasma Membrane |
| Q13822 | [Ectonucleotide pyrophosphatase/phosphodiesterase family member 2, precursor (EC 3.1.4.39) (E-NPP 2) (Extracellular lysophospholipase D), (LysoPLD) (Autotaxin).]                                                                                                                                                                                                                                                                                                                                                                                                                                                                                                                                                      | Plasma Membrane |
| P08473 | [Nephrilysin (EC 3.4.24.11) (Neutral endopeptidase) (NEP), (Enkephalinase) (Neutral endopeptidase 24.11) (Atriopeptidase) (Common, acute lymphocytic leukemia antigen) (CALLA) (CD10 antigen).]                                                                                                                                                                                                                                                                                                                                                                                                                                                                                                                        | Plasma Membrane |
| P78562 | [Phosphate-regulating neutral endopeptidase (EC 3.4.24.-), (Metalloendopeptidase homolog PEX) (X-linked hypophosphatemia protein), (HYP) (Vitamin D-resistant hypophosphatemic rickets protein).]                                                                                                                                                                                                                                                                                                                                                                                                                                                                                                                      | Plasma Membrane |
| P08571 | [Monocyte differentiation antigen CD14 precursor (Myeloid cell-specific, leucine-rich glycoprotein) [Contains: Monocyte differentiation antigen, CD14, urinary form; Monocyte differentiation antigen CD14, membrane-, bound form].]                                                                                                                                                                                                                                                                                                                                                                                                                                                                                   | Plasma Membrane |
| Q14982 | [Opioid-binding protein/cell adhesion molecule precursor (OBCAM), (Opioid-binding cell adhesion molecule) (OPCML).]                                                                                                                                                                                                                                                                                                                                                                                                                                                                                                                                                                                                    | Plasma Membrane |
| Q99665 | [Interleukin-12 receptor beta-2 chain precursor (IL-12 receptor beta-2), (IL-12R-beta2).]                                                                                                                                                                                                                                                                                                                                                                                                                                                                                                                                                                                                                              | Plasma Membrane |
| Q9NPB9 | [C-C chemokine receptor type 11 (C-C CKR-11) (CC-CKR-11) (CCR-11) (CC, chemokine receptor-like 1) (CCRL1) (CCX CKR).]                                                                                                                                                                                                                                                                                                                                                                                                                                                                                                                                                                                                  | Plasma Membrane |
| P29320 | [Ephrin type-A receptor 3 precursor (EC 2.7.10.1) (Tyrosine-protein, kinase receptor ETK1) (HEK) (HEK4) (Tyrosine-protein kinase TYRO4).]                                                                                                                                                                                                                                                                                                                                                                                                                                                                                                                                                                              | Plasma Membrane |
| O60486 | [Plexin-C1 precursor (Virus-encoded semaphorin protein receptor) (CD232, antigen).]                                                                                                                                                                                                                                                                                                                                                                                                                                                                                                                                                                                                                                    | Plasma Membrane |



|        |                                                                                                                                                                                                                                                                   |                 |
|--------|-------------------------------------------------------------------------------------------------------------------------------------------------------------------------------------------------------------------------------------------------------------------|-----------------|
| O15244 | Solute carrier family 22 member 2 (Organic cation transporter OCT2).                                                                                                                                                                                              | Plasma Membrane |
| Q9BVA0 | [Katanin p80 WD40-containing subunit B1 (Katanin p80 subunit B1) (p80, katanin).]                                                                                                                                                                                 | Protein Complex |
| P25054 | Adenomatous polyposis coli protein (Protein APC).                                                                                                                                                                                                                 | Protein Complex |
| P68871 | [Hemoglobin subunit beta (Hemoglobin beta chain) (Beta-globin), [Contains: LVV-hemorphin-7].]                                                                                                                                                                     | Protein Complex |
| Q99460 | [26S proteasome non-ATPase regulatory subunit 1 (26S proteasome, regulatory subunit RPN2) (26S proteasome regulatory subunit S1) (26S, proteasome subunit p112).]                                                                                                 | Protein Complex |
| Q14139 | Ubiquitin conjugation factor E4 A.                                                                                                                                                                                                                                | Protein Complex |
| Q53F97 | Alpha 2 globin variant (Fragment).                                                                                                                                                                                                                                | Protein Complex |
| Q9UKX3 | [Myosin-13 (Myosin heavy chain 13) (Myosin heavy chain, skeletal, muscle, extraocular) (MyHC- <i>eo</i> ).]                                                                                                                                                       | Protein Complex |
| P61289 | [Proteasome activator complex subunit 3 (Proteasome activator 28, subunit gamma) (PA28gamma) (PA28g) (Activator of multicatalytic, protease subunit 3) (11S regulator complex subunit gamma) (REG-gamma), (Ki nuclear autoantigen).]                              | Protein Complex |
| O60934 | [Nibrin (Nijmegen breakage syndrome protein 1) (Cell cycle regulatory, protein p95).]                                                                                                                                                                             | Protein Complex |
| Q9BX26 | [Synaptonemal complex protein 2 (SCP-2) (Synaptonemal complex lateral, element protein) (hsSCP2).]                                                                                                                                                                | Protein Complex |
| P02675 | Fibrinogen beta chain precursor [Contains: Fibrinopeptide B].                                                                                                                                                                                                     | Protein Complex |
| Q6P9B9 | Integrator complex subunit 5 (Int5).                                                                                                                                                                                                                              | Protein Complex |
| P52732 | [Kinesin-like protein KIF11 (Kinesin-related motor protein Eg5), (Kinesin-like spindle protein HKSP) (Thyroid receptor-interacting, protein 5) (TRIP-5) (Kinesin-like protein 1).]                                                                                | Protein Complex |
| Q9NP71 | [Williams-Beuren syndrome chromosomal region 14 protein (WS basic-, helix-loop-helix leucine zipper protein) (WS-bHLH) (Mix interactor), (MLX-interacting protein-like).]                                                                                         | Transcription   |
| P21675 | [Transcription initiation factor TFIID subunit 1 (EC 2.7.11.1), (Transcription initiation factor TFIID 250 kDa subunit) (TAF(II)250), (TAFII-250) (TAFII250) (TBP-associated factor 250 kDa) (p250) (Cell, cycle gene 1 protein).]                                | Transcription   |
| Q6P1X5 | [Transcription initiation factor TFIID subunit 2 (Transcription, initiation factor TFIID 150 kDa subunit) (TBP-associated factor 150, kDa) (TAFII-150) (TAFII150) (150 kDa cofactor of initiator function), (RNA polymerase II TBP-associated factor subunit B).] | Transcription   |
| O00268 | [Transcription initiation factor TFIID subunit 4 (TBP-associated factor, 4) (Transcription initiation factor TFIID 135 kDa subunit), (TAF(II)135) (TAFII-135) (TAFII135) (TAFII-130) (TAFII130) (RNA, polymerase II TBP-associated factor subunit C).]            | Transcription   |
| Q13485 | [Mothers against decapentaplegic homolog 4 (SMAD 4) (Mothers against, DPP homolog 4) (Deletion target in pancreatic carcinoma 4) (hSMAD4).]                                                                                                                       | Transcription   |
| P53992 | Protein transport protein Sec24C (SEC24-related protein C).                                                                                                                                                                                                       | Vesicle         |
| P02787 | [Serotransferrin precursor (Transferrin) (Siderophilin) (Beta-1-metal-, binding globulin).]                                                                                                                                                                       | Vesicle         |
| O60656 | [UDP-glucuronosyltransferase 1-9 precursor (EC 2.4.1.17) (UDP-, glucuronosyltransferase 1A9) (UDPGT) (UGT1*9) (UGT1-9) (UGT1.9) (UGT-, 1I) (UGT1I) (IugP4).]                                                                                                      | Vesicle         |
